# Supplementary material
Source: PubMed Central journal article supplement (PMC7780394)
Supplement: 12913_2020_6009_MOESM4_ESM.pdf [file 12913_2020_6009_MOESM4_ESM.pdf]

# PAROLE-Onco-2-Patients accompagnés-English

Guide des codes ▾

## Code du dictionnaire de données

09-10-2020 21:02

^ Collapse all instruments

| #                                                                                                            | Nom de variable/champ                                                                    | Étiquette de champ<br><i>Note de champ</i>                             | Attributs de champ (type de champ, validation, choix, logique de branchement, calculs, etc.)                                                                                                                                                                                                                                                                                                           |   |                        |   |                     |   |                    |   |                 |   |                 |   |                 |   |                           |
|--------------------------------------------------------------------------------------------------------------|------------------------------------------------------------------------------------------|------------------------------------------------------------------------|--------------------------------------------------------------------------------------------------------------------------------------------------------------------------------------------------------------------------------------------------------------------------------------------------------------------------------------------------------------------------------------------------------|---|------------------------|---|---------------------|---|--------------------|---|-----------------|---|-----------------|---|-----------------|---|---------------------------|
| Formulaire : <b>Participant identification form</b> (participant_identification_form) <span>▾ Expand</span>  |                                                                                          |                                                                        |                                                                                                                                                                                                                                                                                                                                                                                                        |   |                        |   |                     |   |                    |   |                 |   |                 |   |                 |   |                           |
| Formulaire : <b>Integrated consent</b> (integrated_consent) <span>▾ Expand</span>                            |                                                                                          |                                                                        |                                                                                                                                                                                                                                                                                                                                                                                                        |   |                        |   |                     |   |                    |   |                 |   |                 |   |                 |   |                           |
| Formulaire : <b>Socio-demographic questionnaire</b> (sociodemographic_questionnaire) <span>^ Collapse</span> |                                                                                          |                                                                        |                                                                                                                                                                                                                                                                                                                                                                                                        |   |                        |   |                     |   |                    |   |                 |   |                 |   |                 |   |                           |
| 21                                                                                                           | pa_bidon6pa                                                                              | To begin the questionnaire, here are some socio-demographic questions. | descriptive                                                                                                                                                                                                                                                                                                                                                                                            |   |                        |   |                     |   |                    |   |                 |   |                 |   |                 |   |                           |
| 22                                                                                                           | pa_sexepa                                                                                | You are... ?                                                           | radio<br><table border="1"> <tr><td>1</td><td>A woman</td></tr> <tr><td>2</td><td>A man</td></tr> </table> Alignement personnalisé : LV                                                                                                                                                                                                                                                                | 1 | A woman                | 2 | A man               |   |                    |   |                 |   |                 |   |                 |   |                           |
| 1                                                                                                            | A woman                                                                                  |                                                                        |                                                                                                                                                                                                                                                                                                                                                                                                        |   |                        |   |                     |   |                    |   |                 |   |                 |   |                 |   |                           |
| 2                                                                                                            | A man                                                                                    |                                                                        |                                                                                                                                                                                                                                                                                                                                                                                                        |   |                        |   |                     |   |                    |   |                 |   |                 |   |                 |   |                           |
| 23                                                                                                           | pa_agepa                                                                                 | What is your age group?                                                | radio<br><table border="1"> <tr><td>1</td><td>24 years old and under</td></tr> <tr><td>2</td><td>25-34 years old</td></tr> <tr><td>3</td><td>35-44 years old</td></tr> <tr><td>4</td><td>45-54 years old</td></tr> <tr><td>5</td><td>55-64 years old</td></tr> <tr><td>6</td><td>65-74 years old</td></tr> <tr><td>7</td><td>75 ans years old and over</td></tr> </table> Alignement personnalisé : LV | 1 | 24 years old and under | 2 | 25-34 years old     | 3 | 35-44 years old    | 4 | 45-54 years old | 5 | 55-64 years old | 6 | 65-74 years old | 7 | 75 ans years old and over |
| 1                                                                                                            | 24 years old and under                                                                   |                                                                        |                                                                                                                                                                                                                                                                                                                                                                                                        |   |                        |   |                     |   |                    |   |                 |   |                 |   |                 |   |                           |
| 2                                                                                                            | 25-34 years old                                                                          |                                                                        |                                                                                                                                                                                                                                                                                                                                                                                                        |   |                        |   |                     |   |                    |   |                 |   |                 |   |                 |   |                           |
| 3                                                                                                            | 35-44 years old                                                                          |                                                                        |                                                                                                                                                                                                                                                                                                                                                                                                        |   |                        |   |                     |   |                    |   |                 |   |                 |   |                 |   |                           |
| 4                                                                                                            | 45-54 years old                                                                          |                                                                        |                                                                                                                                                                                                                                                                                                                                                                                                        |   |                        |   |                     |   |                    |   |                 |   |                 |   |                 |   |                           |
| 5                                                                                                            | 55-64 years old                                                                          |                                                                        |                                                                                                                                                                                                                                                                                                                                                                                                        |   |                        |   |                     |   |                    |   |                 |   |                 |   |                 |   |                           |
| 6                                                                                                            | 65-74 years old                                                                          |                                                                        |                                                                                                                                                                                                                                                                                                                                                                                                        |   |                        |   |                     |   |                    |   |                 |   |                 |   |                 |   |                           |
| 7                                                                                                            | 75 ans years old and over                                                                |                                                                        |                                                                                                                                                                                                                                                                                                                                                                                                        |   |                        |   |                     |   |                    |   |                 |   |                 |   |                 |   |                           |
| 24                                                                                                           | pa_nepa                                                                                  | Where were you born?                                                   | radio<br><table border="1"> <tr><td>1</td><td>In Quebec</td></tr> <tr><td>2</td><td>Elsewhere in Canada</td></tr> <tr><td>3</td><td>Outside Canada</td></tr> <tr><td>4</td><td>Does not answer</td></tr> </table> Alignement personnalisé : LV                                                                                                                                                         | 1 | In Quebec              | 2 | Elsewhere in Canada | 3 | Outside Canada     | 4 | Does not answer |   |                 |   |                 |   |                           |
| 1                                                                                                            | In Quebec                                                                                |                                                                        |                                                                                                                                                                                                                                                                                                                                                                                                        |   |                        |   |                     |   |                    |   |                 |   |                 |   |                 |   |                           |
| 2                                                                                                            | Elsewhere in Canada                                                                      |                                                                        |                                                                                                                                                                                                                                                                                                                                                                                                        |   |                        |   |                     |   |                    |   |                 |   |                 |   |                 |   |                           |
| 3                                                                                                            | Outside Canada                                                                           |                                                                        |                                                                                                                                                                                                                                                                                                                                                                                                        |   |                        |   |                     |   |                    |   |                 |   |                 |   |                 |   |                           |
| 4                                                                                                            | Does not answer                                                                          |                                                                        |                                                                                                                                                                                                                                                                                                                                                                                                        |   |                        |   |                     |   |                    |   |                 |   |                 |   |                 |   |                           |
| 25                                                                                                           | pa_neepascanadapa<br>Afficher le champ UNIQUEM<br>ENT si :<br>[pa_nepa] = '3'            | If you were born outside of Canada, please specify the country.        | text<br>Alignement personnalisé : LV                                                                                                                                                                                                                                                                                                                                                                   |   |                        |   |                     |   |                    |   |                 |   |                 |   |                 |   |                           |
| 26                                                                                                           | pa_anqcpa<br>Afficher le champ UNIQUEM<br>ENT si :<br>[pa_nepa] = '2' or [pa_nepa] = '3' | How many years have you lived in Quebec?                               | radio<br><table border="1"> <tr><td>1</td><td>Less than 5 years</td></tr> <tr><td>2</td><td>5 to 10 years</td></tr> <tr><td>3</td><td>More than 10 years</td></tr> <tr><td>4</td><td>Don't know</td></tr> </table> Alignement personnalisé : LV                                                                                                                                                        | 1 | Less than 5 years      | 2 | 5 to 10 years       | 3 | More than 10 years | 4 | Don't know      |   |                 |   |                 |   |                           |
| 1                                                                                                            | Less than 5 years                                                                        |                                                                        |                                                                                                                                                                                                                                                                                                                                                                                                        |   |                        |   |                     |   |                    |   |                 |   |                 |   |                 |   |                           |
| 2                                                                                                            | 5 to 10 years                                                                            |                                                                        |                                                                                                                                                                                                                                                                                                                                                                                                        |   |                        |   |                     |   |                    |   |                 |   |                 |   |                 |   |                           |
| 3                                                                                                            | More than 10 years                                                                       |                                                                        |                                                                                                                                                                                                                                                                                                                                                                                                        |   |                        |   |                     |   |                    |   |                 |   |                 |   |                 |   |                           |
| 4                                                                                                            | Don't know                                                                               |                                                                        |                                                                                                                                                                                                                                                                                                                                                                                                        |   |                        |   |                     |   |                    |   |                 |   |                 |   |                 |   |                           |

|    |                                                                                         |                                                                                                                                                 |                                                                                                                                                                                                                                                                                                                                                                                                                                                                                                                                                                                                                                                                                                                                                                                                                                                                                                                           |   |                                      |        |                                 |                       |                              |   |                                            |        |                          |                       |                                       |   |                                      |       |                                 |   |           |   |                |    |                               |    |                      |    |       |    |            |    |             |    |            |    |         |    |                               |
|----|-----------------------------------------------------------------------------------------|-------------------------------------------------------------------------------------------------------------------------------------------------|---------------------------------------------------------------------------------------------------------------------------------------------------------------------------------------------------------------------------------------------------------------------------------------------------------------------------------------------------------------------------------------------------------------------------------------------------------------------------------------------------------------------------------------------------------------------------------------------------------------------------------------------------------------------------------------------------------------------------------------------------------------------------------------------------------------------------------------------------------------------------------------------------------------------------|---|--------------------------------------|--------|---------------------------------|-----------------------|------------------------------|---|--------------------------------------------|--------|--------------------------|-----------------------|---------------------------------------|---|--------------------------------------|-------|---------------------------------|---|-----------|---|----------------|----|-------------------------------|----|----------------------|----|-------|----|------------|----|-------------|----|------------|----|---------|----|-------------------------------|
| 27 | ppa57pa                                                                                 | In which administrative region do you live?                                                                                                     | <p>radio</p> <table border="1"> <tr><td>0</td><td>Bas-Saint-Laurent</td></tr> <tr><td>1</td><td>Saguenay-Lac-Saint-Jean</td></tr> <tr><td>2</td><td>Capitale-Nationale (Québec)</td></tr> <tr><td>3</td><td>Mauricie-et-Centre-du-Québec</td></tr> <tr><td>4</td><td>Estrie</td></tr> <tr><td>5</td><td>Montréal</td></tr> <tr><td>6</td><td>Outaouais</td></tr> <tr><td>7</td><td>Abitibi-Témiscamingue</td></tr> <tr><td>8</td><td>Côte-Nord</td></tr> <tr><td>9</td><td>Nord-du-Québec</td></tr> <tr><td>10</td><td>Gaspésie-Îles-de-la-Madeleine</td></tr> <tr><td>11</td><td>Chaudière-Appalaches</td></tr> <tr><td>12</td><td>Laval</td></tr> <tr><td>13</td><td>Lanaudière</td></tr> <tr><td>14</td><td>Laurentides</td></tr> <tr><td>15</td><td>Montérégie</td></tr> <tr><td>16</td><td>Nunavik</td></tr> <tr><td>17</td><td>Terres-Cries-de-la-Baie-James</td></tr> </table> <p>Alignement personnalisé : LV</p> | 0 | Bas-Saint-Laurent                    | 1      | Saguenay-Lac-Saint-Jean         | 2                     | Capitale-Nationale (Québec)  | 3 | Mauricie-et-Centre-du-Québec               | 4      | Estrie                   | 5                     | Montréal                              | 6 | Outaouais                            | 7     | Abitibi-Témiscamingue           | 8 | Côte-Nord | 9 | Nord-du-Québec | 10 | Gaspésie-Îles-de-la-Madeleine | 11 | Chaudière-Appalaches | 12 | Laval | 13 | Lanaudière | 14 | Laurentides | 15 | Montérégie | 16 | Nunavik | 17 | Terres-Cries-de-la-Baie-James |
| 0  | Bas-Saint-Laurent                                                                       |                                                                                                                                                 |                                                                                                                                                                                                                                                                                                                                                                                                                                                                                                                                                                                                                                                                                                                                                                                                                                                                                                                           |   |                                      |        |                                 |                       |                              |   |                                            |        |                          |                       |                                       |   |                                      |       |                                 |   |           |   |                |    |                               |    |                      |    |       |    |            |    |             |    |            |    |         |    |                               |
| 1  | Saguenay-Lac-Saint-Jean                                                                 |                                                                                                                                                 |                                                                                                                                                                                                                                                                                                                                                                                                                                                                                                                                                                                                                                                                                                                                                                                                                                                                                                                           |   |                                      |        |                                 |                       |                              |   |                                            |        |                          |                       |                                       |   |                                      |       |                                 |   |           |   |                |    |                               |    |                      |    |       |    |            |    |             |    |            |    |         |    |                               |
| 2  | Capitale-Nationale (Québec)                                                             |                                                                                                                                                 |                                                                                                                                                                                                                                                                                                                                                                                                                                                                                                                                                                                                                                                                                                                                                                                                                                                                                                                           |   |                                      |        |                                 |                       |                              |   |                                            |        |                          |                       |                                       |   |                                      |       |                                 |   |           |   |                |    |                               |    |                      |    |       |    |            |    |             |    |            |    |         |    |                               |
| 3  | Mauricie-et-Centre-du-Québec                                                            |                                                                                                                                                 |                                                                                                                                                                                                                                                                                                                                                                                                                                                                                                                                                                                                                                                                                                                                                                                                                                                                                                                           |   |                                      |        |                                 |                       |                              |   |                                            |        |                          |                       |                                       |   |                                      |       |                                 |   |           |   |                |    |                               |    |                      |    |       |    |            |    |             |    |            |    |         |    |                               |
| 4  | Estrie                                                                                  |                                                                                                                                                 |                                                                                                                                                                                                                                                                                                                                                                                                                                                                                                                                                                                                                                                                                                                                                                                                                                                                                                                           |   |                                      |        |                                 |                       |                              |   |                                            |        |                          |                       |                                       |   |                                      |       |                                 |   |           |   |                |    |                               |    |                      |    |       |    |            |    |             |    |            |    |         |    |                               |
| 5  | Montréal                                                                                |                                                                                                                                                 |                                                                                                                                                                                                                                                                                                                                                                                                                                                                                                                                                                                                                                                                                                                                                                                                                                                                                                                           |   |                                      |        |                                 |                       |                              |   |                                            |        |                          |                       |                                       |   |                                      |       |                                 |   |           |   |                |    |                               |    |                      |    |       |    |            |    |             |    |            |    |         |    |                               |
| 6  | Outaouais                                                                               |                                                                                                                                                 |                                                                                                                                                                                                                                                                                                                                                                                                                                                                                                                                                                                                                                                                                                                                                                                                                                                                                                                           |   |                                      |        |                                 |                       |                              |   |                                            |        |                          |                       |                                       |   |                                      |       |                                 |   |           |   |                |    |                               |    |                      |    |       |    |            |    |             |    |            |    |         |    |                               |
| 7  | Abitibi-Témiscamingue                                                                   |                                                                                                                                                 |                                                                                                                                                                                                                                                                                                                                                                                                                                                                                                                                                                                                                                                                                                                                                                                                                                                                                                                           |   |                                      |        |                                 |                       |                              |   |                                            |        |                          |                       |                                       |   |                                      |       |                                 |   |           |   |                |    |                               |    |                      |    |       |    |            |    |             |    |            |    |         |    |                               |
| 8  | Côte-Nord                                                                               |                                                                                                                                                 |                                                                                                                                                                                                                                                                                                                                                                                                                                                                                                                                                                                                                                                                                                                                                                                                                                                                                                                           |   |                                      |        |                                 |                       |                              |   |                                            |        |                          |                       |                                       |   |                                      |       |                                 |   |           |   |                |    |                               |    |                      |    |       |    |            |    |             |    |            |    |         |    |                               |
| 9  | Nord-du-Québec                                                                          |                                                                                                                                                 |                                                                                                                                                                                                                                                                                                                                                                                                                                                                                                                                                                                                                                                                                                                                                                                                                                                                                                                           |   |                                      |        |                                 |                       |                              |   |                                            |        |                          |                       |                                       |   |                                      |       |                                 |   |           |   |                |    |                               |    |                      |    |       |    |            |    |             |    |            |    |         |    |                               |
| 10 | Gaspésie-Îles-de-la-Madeleine                                                           |                                                                                                                                                 |                                                                                                                                                                                                                                                                                                                                                                                                                                                                                                                                                                                                                                                                                                                                                                                                                                                                                                                           |   |                                      |        |                                 |                       |                              |   |                                            |        |                          |                       |                                       |   |                                      |       |                                 |   |           |   |                |    |                               |    |                      |    |       |    |            |    |             |    |            |    |         |    |                               |
| 11 | Chaudière-Appalaches                                                                    |                                                                                                                                                 |                                                                                                                                                                                                                                                                                                                                                                                                                                                                                                                                                                                                                                                                                                                                                                                                                                                                                                                           |   |                                      |        |                                 |                       |                              |   |                                            |        |                          |                       |                                       |   |                                      |       |                                 |   |           |   |                |    |                               |    |                      |    |       |    |            |    |             |    |            |    |         |    |                               |
| 12 | Laval                                                                                   |                                                                                                                                                 |                                                                                                                                                                                                                                                                                                                                                                                                                                                                                                                                                                                                                                                                                                                                                                                                                                                                                                                           |   |                                      |        |                                 |                       |                              |   |                                            |        |                          |                       |                                       |   |                                      |       |                                 |   |           |   |                |    |                               |    |                      |    |       |    |            |    |             |    |            |    |         |    |                               |
| 13 | Lanaudière                                                                              |                                                                                                                                                 |                                                                                                                                                                                                                                                                                                                                                                                                                                                                                                                                                                                                                                                                                                                                                                                                                                                                                                                           |   |                                      |        |                                 |                       |                              |   |                                            |        |                          |                       |                                       |   |                                      |       |                                 |   |           |   |                |    |                               |    |                      |    |       |    |            |    |             |    |            |    |         |    |                               |
| 14 | Laurentides                                                                             |                                                                                                                                                 |                                                                                                                                                                                                                                                                                                                                                                                                                                                                                                                                                                                                                                                                                                                                                                                                                                                                                                                           |   |                                      |        |                                 |                       |                              |   |                                            |        |                          |                       |                                       |   |                                      |       |                                 |   |           |   |                |    |                               |    |                      |    |       |    |            |    |             |    |            |    |         |    |                               |
| 15 | Montérégie                                                                              |                                                                                                                                                 |                                                                                                                                                                                                                                                                                                                                                                                                                                                                                                                                                                                                                                                                                                                                                                                                                                                                                                                           |   |                                      |        |                                 |                       |                              |   |                                            |        |                          |                       |                                       |   |                                      |       |                                 |   |           |   |                |    |                               |    |                      |    |       |    |            |    |             |    |            |    |         |    |                               |
| 16 | Nunavik                                                                                 |                                                                                                                                                 |                                                                                                                                                                                                                                                                                                                                                                                                                                                                                                                                                                                                                                                                                                                                                                                                                                                                                                                           |   |                                      |        |                                 |                       |                              |   |                                            |        |                          |                       |                                       |   |                                      |       |                                 |   |           |   |                |    |                               |    |                      |    |       |    |            |    |             |    |            |    |         |    |                               |
| 17 | Terres-Cries-de-la-Baie-James                                                           |                                                                                                                                                 |                                                                                                                                                                                                                                                                                                                                                                                                                                                                                                                                                                                                                                                                                                                                                                                                                                                                                                                           |   |                                      |        |                                 |                       |                              |   |                                            |        |                          |                       |                                       |   |                                      |       |                                 |   |           |   |                |    |                               |    |                      |    |       |    |            |    |             |    |            |    |         |    |                               |
| 28 | pa_nbmenagepa                                                                           | How many people compose your household and reside permanently in your home, including you?                                                      | <p>text (number)</p> <p>Alignement personnalisé : LV</p>                                                                                                                                                                                                                                                                                                                                                                                                                                                                                                                                                                                                                                                                                                                                                                                                                                                                  |   |                                      |        |                                 |                       |                              |   |                                            |        |                          |                       |                                       |   |                                      |       |                                 |   |           |   |                |    |                               |    |                      |    |       |    |            |    |             |    |            |    |         |    |                               |
| 29 | pa_nbchargepa                                                                           | How many of the people in your household are dependent on you?                                                                                  | <p>text (number)</p> <p>Alignement personnalisé : LV</p>                                                                                                                                                                                                                                                                                                                                                                                                                                                                                                                                                                                                                                                                                                                                                                                                                                                                  |   |                                      |        |                                 |                       |                              |   |                                            |        |                          |                       |                                       |   |                                      |       |                                 |   |           |   |                |    |                               |    |                      |    |       |    |            |    |             |    |            |    |         |    |                               |
| 30 | pa_situationpa                                                                          | What type of situation best suits the composition of your household?                                                                            | <p>radio</p> <table border="1"> <tr><td>1</td><td>Person living alone in the household</td></tr> <tr><td>2</td><td>Couple without children at home</td></tr> <tr><td>3</td><td>Couple with children at home</td></tr> <tr><td>4</td><td>Single-parent family (children of any age)</td></tr> <tr><td>5</td><td>Family with other people</td></tr> <tr><td>6</td><td>Related persons only (siblings, etc.)</td></tr> <tr><td>7</td><td>Non-related persons only (roommates)</td></tr> <tr><td>8</td><td>Other (multiple families, etc.)</td></tr> </table> <p>Alignement personnalisé : LV</p>                                                                                                                                                                                                                                                                                                                             | 1 | Person living alone in the household | 2      | Couple without children at home | 3                     | Couple with children at home | 4 | Single-parent family (children of any age) | 5      | Family with other people | 6                     | Related persons only (siblings, etc.) | 7 | Non-related persons only (roommates) | 8     | Other (multiple families, etc.) |   |           |   |                |    |                               |    |                      |    |       |    |            |    |             |    |            |    |         |    |                               |
| 1  | Person living alone in the household                                                    |                                                                                                                                                 |                                                                                                                                                                                                                                                                                                                                                                                                                                                                                                                                                                                                                                                                                                                                                                                                                                                                                                                           |   |                                      |        |                                 |                       |                              |   |                                            |        |                          |                       |                                       |   |                                      |       |                                 |   |           |   |                |    |                               |    |                      |    |       |    |            |    |             |    |            |    |         |    |                               |
| 2  | Couple without children at home                                                         |                                                                                                                                                 |                                                                                                                                                                                                                                                                                                                                                                                                                                                                                                                                                                                                                                                                                                                                                                                                                                                                                                                           |   |                                      |        |                                 |                       |                              |   |                                            |        |                          |                       |                                       |   |                                      |       |                                 |   |           |   |                |    |                               |    |                      |    |       |    |            |    |             |    |            |    |         |    |                               |
| 3  | Couple with children at home                                                            |                                                                                                                                                 |                                                                                                                                                                                                                                                                                                                                                                                                                                                                                                                                                                                                                                                                                                                                                                                                                                                                                                                           |   |                                      |        |                                 |                       |                              |   |                                            |        |                          |                       |                                       |   |                                      |       |                                 |   |           |   |                |    |                               |    |                      |    |       |    |            |    |             |    |            |    |         |    |                               |
| 4  | Single-parent family (children of any age)                                              |                                                                                                                                                 |                                                                                                                                                                                                                                                                                                                                                                                                                                                                                                                                                                                                                                                                                                                                                                                                                                                                                                                           |   |                                      |        |                                 |                       |                              |   |                                            |        |                          |                       |                                       |   |                                      |       |                                 |   |           |   |                |    |                               |    |                      |    |       |    |            |    |             |    |            |    |         |    |                               |
| 5  | Family with other people                                                                |                                                                                                                                                 |                                                                                                                                                                                                                                                                                                                                                                                                                                                                                                                                                                                                                                                                                                                                                                                                                                                                                                                           |   |                                      |        |                                 |                       |                              |   |                                            |        |                          |                       |                                       |   |                                      |       |                                 |   |           |   |                |    |                               |    |                      |    |       |    |            |    |             |    |            |    |         |    |                               |
| 6  | Related persons only (siblings, etc.)                                                   |                                                                                                                                                 |                                                                                                                                                                                                                                                                                                                                                                                                                                                                                                                                                                                                                                                                                                                                                                                                                                                                                                                           |   |                                      |        |                                 |                       |                              |   |                                            |        |                          |                       |                                       |   |                                      |       |                                 |   |           |   |                |    |                               |    |                      |    |       |    |            |    |             |    |            |    |         |    |                               |
| 7  | Non-related persons only (roommates)                                                    |                                                                                                                                                 |                                                                                                                                                                                                                                                                                                                                                                                                                                                                                                                                                                                                                                                                                                                                                                                                                                                                                                                           |   |                                      |        |                                 |                       |                              |   |                                            |        |                          |                       |                                       |   |                                      |       |                                 |   |           |   |                |    |                               |    |                      |    |       |    |            |    |             |    |            |    |         |    |                               |
| 8  | Other (multiple families, etc.)                                                         |                                                                                                                                                 |                                                                                                                                                                                                                                                                                                                                                                                                                                                                                                                                                                                                                                                                                                                                                                                                                                                                                                                           |   |                                      |        |                                 |                       |                              |   |                                            |        |                          |                       |                                       |   |                                      |       |                                 |   |           |   |                |    |                               |    |                      |    |       |    |            |    |             |    |            |    |         |    |                               |
| 31 | pa_situationautrepa<br>Afficher le champ UNIQUEMENT si :<br>[pa_situationpa] = '8'      | If you answered "Other", please specify the composition of your household.                                                                      | <p>text</p> <p>Alignement personnalisé : LV</p>                                                                                                                                                                                                                                                                                                                                                                                                                                                                                                                                                                                                                                                                                                                                                                                                                                                                           |   |                                      |        |                                 |                       |                              |   |                                            |        |                          |                       |                                       |   |                                      |       |                                 |   |           |   |                |    |                               |    |                      |    |       |    |            |    |             |    |            |    |         |    |                               |
| 32 | ppa_entou_v2                                                                            | Is there one or more people in your entourage (spouse, child, friend, other) who can help you if necessary with your current medical follow-up? | <p>radio</p> <table border="1"> <tr><td>1</td><td>Yes</td></tr> <tr><td>2</td><td>No</td></tr> </table> <p>Alignement personnalisé : LV</p>                                                                                                                                                                                                                                                                                                                                                                                                                                                                                                                                                                                                                                                                                                                                                                               | 1 | Yes                                  | 2      | No                              |                       |                              |   |                                            |        |                          |                       |                                       |   |                                      |       |                                 |   |           |   |                |    |                               |    |                      |    |       |    |            |    |             |    |            |    |         |    |                               |
| 1  | Yes                                                                                     |                                                                                                                                                 |                                                                                                                                                                                                                                                                                                                                                                                                                                                                                                                                                                                                                                                                                                                                                                                                                                                                                                                           |   |                                      |        |                                 |                       |                              |   |                                            |        |                          |                       |                                       |   |                                      |       |                                 |   |           |   |                |    |                               |    |                      |    |       |    |            |    |             |    |            |    |         |    |                               |
| 2  | No                                                                                      |                                                                                                                                                 |                                                                                                                                                                                                                                                                                                                                                                                                                                                                                                                                                                                                                                                                                                                                                                                                                                                                                                                           |   |                                      |        |                                 |                       |                              |   |                                            |        |                          |                       |                                       |   |                                      |       |                                 |   |           |   |                |    |                               |    |                      |    |       |    |            |    |             |    |            |    |         |    |                               |
| 33 | ppa_entouprecis_v2<br>Afficher le champ UNIQUEMENT si :<br>[ppa_entou_v2] = '1'         | This person is your (you can choose more than one answer) :                                                                                     | <p>checkbox</p> <table border="1"> <tr><td>1</td><td>ppa_entouprecis_v2__1</td><td>Spouse</td></tr> <tr><td>2</td><td>ppa_entouprecis_v2__2</td><td>Child</td></tr> <tr><td>3</td><td>ppa_entouprecis_v2__3</td><td>Parent</td></tr> <tr><td>4</td><td>ppa_entouprecis_v2__4</td><td>Friend</td></tr> <tr><td>5</td><td>ppa_entouprecis_v2__5</td><td>Other</td></tr> </table> <p>Alignement personnalisé : LV</p>                                                                                                                                                                                                                                                                                                                                                                                                                                                                                                        | 1 | ppa_entouprecis_v2__1                | Spouse | 2                               | ppa_entouprecis_v2__2 | Child                        | 3 | ppa_entouprecis_v2__3                      | Parent | 4                        | ppa_entouprecis_v2__4 | Friend                                | 5 | ppa_entouprecis_v2__5                | Other |                                 |   |           |   |                |    |                               |    |                      |    |       |    |            |    |             |    |            |    |         |    |                               |
| 1  | ppa_entouprecis_v2__1                                                                   | Spouse                                                                                                                                          |                                                                                                                                                                                                                                                                                                                                                                                                                                                                                                                                                                                                                                                                                                                                                                                                                                                                                                                           |   |                                      |        |                                 |                       |                              |   |                                            |        |                          |                       |                                       |   |                                      |       |                                 |   |           |   |                |    |                               |    |                      |    |       |    |            |    |             |    |            |    |         |    |                               |
| 2  | ppa_entouprecis_v2__2                                                                   | Child                                                                                                                                           |                                                                                                                                                                                                                                                                                                                                                                                                                                                                                                                                                                                                                                                                                                                                                                                                                                                                                                                           |   |                                      |        |                                 |                       |                              |   |                                            |        |                          |                       |                                       |   |                                      |       |                                 |   |           |   |                |    |                               |    |                      |    |       |    |            |    |             |    |            |    |         |    |                               |
| 3  | ppa_entouprecis_v2__3                                                                   | Parent                                                                                                                                          |                                                                                                                                                                                                                                                                                                                                                                                                                                                                                                                                                                                                                                                                                                                                                                                                                                                                                                                           |   |                                      |        |                                 |                       |                              |   |                                            |        |                          |                       |                                       |   |                                      |       |                                 |   |           |   |                |    |                               |    |                      |    |       |    |            |    |             |    |            |    |         |    |                               |
| 4  | ppa_entouprecis_v2__4                                                                   | Friend                                                                                                                                          |                                                                                                                                                                                                                                                                                                                                                                                                                                                                                                                                                                                                                                                                                                                                                                                                                                                                                                                           |   |                                      |        |                                 |                       |                              |   |                                            |        |                          |                       |                                       |   |                                      |       |                                 |   |           |   |                |    |                               |    |                      |    |       |    |            |    |             |    |            |    |         |    |                               |
| 5  | ppa_entouprecis_v2__5                                                                   | Other                                                                                                                                           |                                                                                                                                                                                                                                                                                                                                                                                                                                                                                                                                                                                                                                                                                                                                                                                                                                                                                                                           |   |                                      |        |                                 |                       |                              |   |                                            |        |                          |                       |                                       |   |                                      |       |                                 |   |           |   |                |    |                               |    |                      |    |       |    |            |    |             |    |            |    |         |    |                               |
| 34 | pro_entouautre_v2<br>Afficher le champ UNIQUEMENT si :<br>[ppa_entouprecis_v2(5)] = '1' | If you answered "Other", please specify:                                                                                                        | <p>text</p> <p>Alignement personnalisé : LV</p>                                                                                                                                                                                                                                                                                                                                                                                                                                                                                                                                                                                                                                                                                                                                                                                                                                                                           |   |                                      |        |                                 |                       |                              |   |                                            |        |                          |                       |                                       |   |                                      |       |                                 |   |           |   |                |    |                               |    |                      |    |       |    |            |    |             |    |            |    |         |    |                               |

|    |                                                                                               |                                                                                              |                                                                                                                                                                                                                                                                                                                                                                                                                                                                                                                                                                                                                                                                                 |   |                                               |   |                                                                                               |   |                                       |   |                                         |   |                                                                              |   |                                                                                       |   |                               |   |                               |   |                                               |    |       |
|----|-----------------------------------------------------------------------------------------------|----------------------------------------------------------------------------------------------|---------------------------------------------------------------------------------------------------------------------------------------------------------------------------------------------------------------------------------------------------------------------------------------------------------------------------------------------------------------------------------------------------------------------------------------------------------------------------------------------------------------------------------------------------------------------------------------------------------------------------------------------------------------------------------|---|-----------------------------------------------|---|-----------------------------------------------------------------------------------------------|---|---------------------------------------|---|-----------------------------------------|---|------------------------------------------------------------------------------|---|---------------------------------------------------------------------------------------|---|-------------------------------|---|-------------------------------|---|-----------------------------------------------|----|-------|
| 35 | pa_educpa                                                                                     | What is the highest level of education you have completed?                                   | <p>radio</p> <table border="1"> <tr><td>1</td><td>No diploma</td></tr> <tr><td>2</td><td>Elementary education</td></tr> <tr><td>3</td><td>Partial studies at high school (I-IV)</td></tr> <tr><td>4</td><td>High School Diploma (Sec V or Grade 12)</td></tr> <tr><td>5</td><td>Partial studies in a CEGEP, technical school or professional training school</td></tr> <tr><td>6</td><td>Diploma or certificate from a CEGEP, technical school or professional training school</td></tr> <tr><td>7</td><td>Partial studies at university</td></tr> <tr><td>8</td><td>University degree</td></tr> <tr><td>9</td><td>Other</td></tr> </table> <p>Alignement personnalisé : LV</p> | 1 | No diploma                                    | 2 | Elementary education                                                                          | 3 | Partial studies at high school (I-IV) | 4 | High School Diploma (Sec V or Grade 12) | 5 | Partial studies in a CEGEP, technical school or professional training school | 6 | Diploma or certificate from a CEGEP, technical school or professional training school | 7 | Partial studies at university | 8 | University degree             | 9 | Other                                         |    |       |
| 1  | No diploma                                                                                    |                                                                                              |                                                                                                                                                                                                                                                                                                                                                                                                                                                                                                                                                                                                                                                                                 |   |                                               |   |                                                                                               |   |                                       |   |                                         |   |                                                                              |   |                                                                                       |   |                               |   |                               |   |                                               |    |       |
| 2  | Elementary education                                                                          |                                                                                              |                                                                                                                                                                                                                                                                                                                                                                                                                                                                                                                                                                                                                                                                                 |   |                                               |   |                                                                                               |   |                                       |   |                                         |   |                                                                              |   |                                                                                       |   |                               |   |                               |   |                                               |    |       |
| 3  | Partial studies at high school (I-IV)                                                         |                                                                                              |                                                                                                                                                                                                                                                                                                                                                                                                                                                                                                                                                                                                                                                                                 |   |                                               |   |                                                                                               |   |                                       |   |                                         |   |                                                                              |   |                                                                                       |   |                               |   |                               |   |                                               |    |       |
| 4  | High School Diploma (Sec V or Grade 12)                                                       |                                                                                              |                                                                                                                                                                                                                                                                                                                                                                                                                                                                                                                                                                                                                                                                                 |   |                                               |   |                                                                                               |   |                                       |   |                                         |   |                                                                              |   |                                                                                       |   |                               |   |                               |   |                                               |    |       |
| 5  | Partial studies in a CEGEP, technical school or professional training school                  |                                                                                              |                                                                                                                                                                                                                                                                                                                                                                                                                                                                                                                                                                                                                                                                                 |   |                                               |   |                                                                                               |   |                                       |   |                                         |   |                                                                              |   |                                                                                       |   |                               |   |                               |   |                                               |    |       |
| 6  | Diploma or certificate from a CEGEP, technical school or professional training school         |                                                                                              |                                                                                                                                                                                                                                                                                                                                                                                                                                                                                                                                                                                                                                                                                 |   |                                               |   |                                                                                               |   |                                       |   |                                         |   |                                                                              |   |                                                                                       |   |                               |   |                               |   |                                               |    |       |
| 7  | Partial studies at university                                                                 |                                                                                              |                                                                                                                                                                                                                                                                                                                                                                                                                                                                                                                                                                                                                                                                                 |   |                                               |   |                                                                                               |   |                                       |   |                                         |   |                                                                              |   |                                                                                       |   |                               |   |                               |   |                                               |    |       |
| 8  | University degree                                                                             |                                                                                              |                                                                                                                                                                                                                                                                                                                                                                                                                                                                                                                                                                                                                                                                                 |   |                                               |   |                                                                                               |   |                                       |   |                                         |   |                                                                              |   |                                                                                       |   |                               |   |                               |   |                                               |    |       |
| 9  | Other                                                                                         |                                                                                              |                                                                                                                                                                                                                                                                                                                                                                                                                                                                                                                                                                                                                                                                                 |   |                                               |   |                                                                                               |   |                                       |   |                                         |   |                                                                              |   |                                                                                       |   |                               |   |                               |   |                                               |    |       |
| 36 | pa_eduautrepa<br>Afficher le champ UNIQUEM<br>ENT si :<br>[pa_educpa] = '9'                   | If you checked "Other", please specify the highest level of education you have completed.    | <p>text</p> <p>Alignement personnalisé : LV</p>                                                                                                                                                                                                                                                                                                                                                                                                                                                                                                                                                                                                                                 |   |                                               |   |                                                                                               |   |                                       |   |                                         |   |                                                                              |   |                                                                                       |   |                               |   |                               |   |                                               |    |       |
| 37 | pa_occupa                                                                                     | In the past 12 months, what was your main occupation?                                        | <p>radio</p> <table border="1"> <tr><td>1</td><td>Full-time worker</td></tr> <tr><td>2</td><td>Part-time worker</td></tr> <tr><td>3</td><td>Student</td></tr> <tr><td>4</td><td>Volunteer/Unpaid Worker</td></tr> <tr><td>5</td><td>Retired</td></tr> <tr><td>6</td><td>Homemaker</td></tr> <tr><td>7</td><td>On maternity/paternity leave</td></tr> <tr><td>8</td><td>Employment Insurance claimant</td></tr> <tr><td>9</td><td>Income assistance recipient (income security)</td></tr> <tr><td>10</td><td>Other</td></tr> </table> <p>Alignement personnalisé : LV</p>                                                                                                        | 1 | Full-time worker                              | 2 | Part-time worker                                                                              | 3 | Student                               | 4 | Volunteer/Unpaid Worker                 | 5 | Retired                                                                      | 6 | Homemaker                                                                             | 7 | On maternity/paternity leave  | 8 | Employment Insurance claimant | 9 | Income assistance recipient (income security) | 10 | Other |
| 1  | Full-time worker                                                                              |                                                                                              |                                                                                                                                                                                                                                                                                                                                                                                                                                                                                                                                                                                                                                                                                 |   |                                               |   |                                                                                               |   |                                       |   |                                         |   |                                                                              |   |                                                                                       |   |                               |   |                               |   |                                               |    |       |
| 2  | Part-time worker                                                                              |                                                                                              |                                                                                                                                                                                                                                                                                                                                                                                                                                                                                                                                                                                                                                                                                 |   |                                               |   |                                                                                               |   |                                       |   |                                         |   |                                                                              |   |                                                                                       |   |                               |   |                               |   |                                               |    |       |
| 3  | Student                                                                                       |                                                                                              |                                                                                                                                                                                                                                                                                                                                                                                                                                                                                                                                                                                                                                                                                 |   |                                               |   |                                                                                               |   |                                       |   |                                         |   |                                                                              |   |                                                                                       |   |                               |   |                               |   |                                               |    |       |
| 4  | Volunteer/Unpaid Worker                                                                       |                                                                                              |                                                                                                                                                                                                                                                                                                                                                                                                                                                                                                                                                                                                                                                                                 |   |                                               |   |                                                                                               |   |                                       |   |                                         |   |                                                                              |   |                                                                                       |   |                               |   |                               |   |                                               |    |       |
| 5  | Retired                                                                                       |                                                                                              |                                                                                                                                                                                                                                                                                                                                                                                                                                                                                                                                                                                                                                                                                 |   |                                               |   |                                                                                               |   |                                       |   |                                         |   |                                                                              |   |                                                                                       |   |                               |   |                               |   |                                               |    |       |
| 6  | Homemaker                                                                                     |                                                                                              |                                                                                                                                                                                                                                                                                                                                                                                                                                                                                                                                                                                                                                                                                 |   |                                               |   |                                                                                               |   |                                       |   |                                         |   |                                                                              |   |                                                                                       |   |                               |   |                               |   |                                               |    |       |
| 7  | On maternity/paternity leave                                                                  |                                                                                              |                                                                                                                                                                                                                                                                                                                                                                                                                                                                                                                                                                                                                                                                                 |   |                                               |   |                                                                                               |   |                                       |   |                                         |   |                                                                              |   |                                                                                       |   |                               |   |                               |   |                                               |    |       |
| 8  | Employment Insurance claimant                                                                 |                                                                                              |                                                                                                                                                                                                                                                                                                                                                                                                                                                                                                                                                                                                                                                                                 |   |                                               |   |                                                                                               |   |                                       |   |                                         |   |                                                                              |   |                                                                                       |   |                               |   |                               |   |                                               |    |       |
| 9  | Income assistance recipient (income security)                                                 |                                                                                              |                                                                                                                                                                                                                                                                                                                                                                                                                                                                                                                                                                                                                                                                                 |   |                                               |   |                                                                                               |   |                                       |   |                                         |   |                                                                              |   |                                                                                       |   |                               |   |                               |   |                                               |    |       |
| 10 | Other                                                                                         |                                                                                              |                                                                                                                                                                                                                                                                                                                                                                                                                                                                                                                                                                                                                                                                                 |   |                                               |   |                                                                                               |   |                                       |   |                                         |   |                                                                              |   |                                                                                       |   |                               |   |                               |   |                                               |    |       |
| 38 | pa_occuautrepa<br>Afficher le champ UNIQUEM<br>ENT si :<br>[pa_occupa] = '10'                 | If you answered "Other", please specify what was your main occupation in the last 12 months. | <p>text</p> <p>Alignement personnalisé : LV</p>                                                                                                                                                                                                                                                                                                                                                                                                                                                                                                                                                                                                                                 |   |                                               |   |                                                                                               |   |                                       |   |                                         |   |                                                                              |   |                                                                                       |   |                               |   |                               |   |                                               |    |       |
| 39 | pa_finanpa                                                                                    | How do you feel about your financial situation compared to people your own age?              | <p>radio</p> <table border="1"> <tr><td>1</td><td>You consider yourself financially comfortable</td></tr> <tr><td>2</td><td>You consider that your income is sufficient to meet your basic needs or those of your family.</td></tr> <tr><td>3</td><td>You consider yourself poor</td></tr> <tr><td>4</td><td>You consider yourself very poor</td></tr> </table> <p>Alignement personnalisé : LV</p>                                                                                                                                                                                                                                                                             | 1 | You consider yourself financially comfortable | 2 | You consider that your income is sufficient to meet your basic needs or those of your family. | 3 | You consider yourself poor            | 4 | You consider yourself very poor         |   |                                                                              |   |                                                                                       |   |                               |   |                               |   |                                               |    |       |
| 1  | You consider yourself financially comfortable                                                 |                                                                                              |                                                                                                                                                                                                                                                                                                                                                                                                                                                                                                                                                                                                                                                                                 |   |                                               |   |                                                                                               |   |                                       |   |                                         |   |                                                                              |   |                                                                                       |   |                               |   |                               |   |                                               |    |       |
| 2  | You consider that your income is sufficient to meet your basic needs or those of your family. |                                                                                              |                                                                                                                                                                                                                                                                                                                                                                                                                                                                                                                                                                                                                                                                                 |   |                                               |   |                                                                                               |   |                                       |   |                                         |   |                                                                              |   |                                                                                       |   |                               |   |                               |   |                                               |    |       |
| 3  | You consider yourself poor                                                                    |                                                                                              |                                                                                                                                                                                                                                                                                                                                                                                                                                                                                                                                                                                                                                                                                 |   |                                               |   |                                                                                               |   |                                       |   |                                         |   |                                                                              |   |                                                                                       |   |                               |   |                               |   |                                               |    |       |
| 4  | You consider yourself very poor                                                               |                                                                                              |                                                                                                                                                                                                                                                                                                                                                                                                                                                                                                                                                                                                                                                                                 |   |                                               |   |                                                                                               |   |                                       |   |                                         |   |                                                                              |   |                                                                                       |   |                               |   |                               |   |                                               |    |       |
| 40 | sociodemographic_questionnaire_complete                                                       | En-tête de section : <i>Form Status</i><br>Complete?                                         | <p>dropdown</p> <table border="1"> <tr><td>0</td><td>Incomplete</td></tr> <tr><td>1</td><td>Unverified</td></tr> <tr><td>2</td><td>Complete</td></tr> </table>                                                                                                                                                                                                                                                                                                                                                                                                                                                                                                                  | 0 | Incomplete                                    | 1 | Unverified                                                                                    | 2 | Complete                              |   |                                         |   |                                                                              |   |                                                                                       |   |                               |   |                               |   |                                               |    |       |
| 0  | Incomplete                                                                                    |                                                                                              |                                                                                                                                                                                                                                                                                                                                                                                                                                                                                                                                                                                                                                                                                 |   |                                               |   |                                                                                               |   |                                       |   |                                         |   |                                                                              |   |                                                                                       |   |                               |   |                               |   |                                               |    |       |
| 1  | Unverified                                                                                    |                                                                                              |                                                                                                                                                                                                                                                                                                                                                                                                                                                                                                                                                                                                                                                                                 |   |                                               |   |                                                                                               |   |                                       |   |                                         |   |                                                                              |   |                                                                                       |   |                               |   |                               |   |                                               |    |       |
| 2  | Complete                                                                                      |                                                                                              |                                                                                                                                                                                                                                                                                                                                                                                                                                                                                                                                                                                                                                                                                 |   |                                               |   |                                                                                               |   |                                       |   |                                         |   |                                                                              |   |                                                                                       |   |                               |   |                               |   |                                               |    |       |

|    |                                                                                                              |                                                                                                                                                                                                                                                                                                                                                                                                              |                                                                                                                                                                                                                                                                                                                                                                                                                                                                                                                                                                                                                                                                                                                                                                                                                                                                                                                                |   |                                                    |   |                                                              |   |                                         |   |                                   |   |                      |   |                                                 |   |                         |   |                                      |   |                        |    |          |    |       |    |          |    |                         |    |                 |    |          |    |        |    |        |    |         |    |         |    |              |
|----|--------------------------------------------------------------------------------------------------------------|--------------------------------------------------------------------------------------------------------------------------------------------------------------------------------------------------------------------------------------------------------------------------------------------------------------------------------------------------------------------------------------------------------------|--------------------------------------------------------------------------------------------------------------------------------------------------------------------------------------------------------------------------------------------------------------------------------------------------------------------------------------------------------------------------------------------------------------------------------------------------------------------------------------------------------------------------------------------------------------------------------------------------------------------------------------------------------------------------------------------------------------------------------------------------------------------------------------------------------------------------------------------------------------------------------------------------------------------------------|---|----------------------------------------------------|---|--------------------------------------------------------------|---|-----------------------------------------|---|-----------------------------------|---|----------------------|---|-------------------------------------------------|---|-------------------------|---|--------------------------------------|---|------------------------|----|----------|----|-------|----|----------|----|-------------------------|----|-----------------|----|----------|----|--------|----|--------|----|---------|----|---------|----|--------------|
| 41 | pa_recupa                                                                                                    | <p>En-tête de section : <i>The following questions focus on your clinical experience and the information provided by your health care team. By health care team, we mean the various health care professionals who work together: doctors, nurses, pivot nurses, pharmacists, nutritionists, psychologists, social workers, physiotherapists, etc...</i></p> <p>Where were you given this questionnaire?</p> | <p>radio</p> <table border="1"> <tr><td>1</td><td>At CHUM</td></tr> <tr><td>2</td><td>At CIUSSS Mauricie-Centre-du-Québec</td></tr> <tr><td>3</td><td>At CIUSSS de l'Est-de-l'Île-de-Montréal</td></tr> <tr><td>4</td><td>At CHU de Québec-Université Laval</td></tr> <tr><td>5</td><td>At CISSS Laval</td></tr> <tr><td>6</td><td>At CIUSSS du Centre-Ouest-de-l' Île-de-Montréal</td></tr> <tr><td>7</td><td>At CISSS de la Gaspésie</td></tr> <tr><td>8</td><td>At CIUSSS du Saguenay-Lac-Saint-Jean</td></tr> <tr><td>9</td><td>At CUSM</td></tr> </table> <p>Alignement personnalisé : LV</p>                                                                                                                                                                                                                                                                                                                             | 1 | At CHUM                                            | 2 | At CIUSSS Mauricie-Centre-du-Québec                          | 3 | At CIUSSS de l'Est-de-l'Île-de-Montréal | 4 | At CHU de Québec-Université Laval | 5 | At CISSS Laval       | 6 | At CIUSSS du Centre-Ouest-de-l' Île-de-Montréal | 7 | At CISSS de la Gaspésie | 8 | At CIUSSS du Saguenay-Lac-Saint-Jean | 9 | At CUSM                |    |          |    |       |    |          |    |                         |    |                 |    |          |    |        |    |        |    |         |    |         |    |              |
| 1  | At CHUM                                                                                                      |                                                                                                                                                                                                                                                                                                                                                                                                              |                                                                                                                                                                                                                                                                                                                                                                                                                                                                                                                                                                                                                                                                                                                                                                                                                                                                                                                                |   |                                                    |   |                                                              |   |                                         |   |                                   |   |                      |   |                                                 |   |                         |   |                                      |   |                        |    |          |    |       |    |          |    |                         |    |                 |    |          |    |        |    |        |    |         |    |         |    |              |
| 2  | At CIUSSS Mauricie-Centre-du-Québec                                                                          |                                                                                                                                                                                                                                                                                                                                                                                                              |                                                                                                                                                                                                                                                                                                                                                                                                                                                                                                                                                                                                                                                                                                                                                                                                                                                                                                                                |   |                                                    |   |                                                              |   |                                         |   |                                   |   |                      |   |                                                 |   |                         |   |                                      |   |                        |    |          |    |       |    |          |    |                         |    |                 |    |          |    |        |    |        |    |         |    |         |    |              |
| 3  | At CIUSSS de l'Est-de-l'Île-de-Montréal                                                                      |                                                                                                                                                                                                                                                                                                                                                                                                              |                                                                                                                                                                                                                                                                                                                                                                                                                                                                                                                                                                                                                                                                                                                                                                                                                                                                                                                                |   |                                                    |   |                                                              |   |                                         |   |                                   |   |                      |   |                                                 |   |                         |   |                                      |   |                        |    |          |    |       |    |          |    |                         |    |                 |    |          |    |        |    |        |    |         |    |         |    |              |
| 4  | At CHU de Québec-Université Laval                                                                            |                                                                                                                                                                                                                                                                                                                                                                                                              |                                                                                                                                                                                                                                                                                                                                                                                                                                                                                                                                                                                                                                                                                                                                                                                                                                                                                                                                |   |                                                    |   |                                                              |   |                                         |   |                                   |   |                      |   |                                                 |   |                         |   |                                      |   |                        |    |          |    |       |    |          |    |                         |    |                 |    |          |    |        |    |        |    |         |    |         |    |              |
| 5  | At CISSS Laval                                                                                               |                                                                                                                                                                                                                                                                                                                                                                                                              |                                                                                                                                                                                                                                                                                                                                                                                                                                                                                                                                                                                                                                                                                                                                                                                                                                                                                                                                |   |                                                    |   |                                                              |   |                                         |   |                                   |   |                      |   |                                                 |   |                         |   |                                      |   |                        |    |          |    |       |    |          |    |                         |    |                 |    |          |    |        |    |        |    |         |    |         |    |              |
| 6  | At CIUSSS du Centre-Ouest-de-l' Île-de-Montréal                                                              |                                                                                                                                                                                                                                                                                                                                                                                                              |                                                                                                                                                                                                                                                                                                                                                                                                                                                                                                                                                                                                                                                                                                                                                                                                                                                                                                                                |   |                                                    |   |                                                              |   |                                         |   |                                   |   |                      |   |                                                 |   |                         |   |                                      |   |                        |    |          |    |       |    |          |    |                         |    |                 |    |          |    |        |    |        |    |         |    |         |    |              |
| 7  | At CISSS de la Gaspésie                                                                                      |                                                                                                                                                                                                                                                                                                                                                                                                              |                                                                                                                                                                                                                                                                                                                                                                                                                                                                                                                                                                                                                                                                                                                                                                                                                                                                                                                                |   |                                                    |   |                                                              |   |                                         |   |                                   |   |                      |   |                                                 |   |                         |   |                                      |   |                        |    |          |    |       |    |          |    |                         |    |                 |    |          |    |        |    |        |    |         |    |         |    |              |
| 8  | At CIUSSS du Saguenay-Lac-Saint-Jean                                                                         |                                                                                                                                                                                                                                                                                                                                                                                                              |                                                                                                                                                                                                                                                                                                                                                                                                                                                                                                                                                                                                                                                                                                                                                                                                                                                                                                                                |   |                                                    |   |                                                              |   |                                         |   |                                   |   |                      |   |                                                 |   |                         |   |                                      |   |                        |    |          |    |       |    |          |    |                         |    |                 |    |          |    |        |    |        |    |         |    |         |    |              |
| 9  | At CUSM                                                                                                      |                                                                                                                                                                                                                                                                                                                                                                                                              |                                                                                                                                                                                                                                                                                                                                                                                                                                                                                                                                                                                                                                                                                                                                                                                                                                                                                                                                |   |                                                    |   |                                                              |   |                                         |   |                                   |   |                      |   |                                                 |   |                         |   |                                      |   |                        |    |          |    |       |    |          |    |                         |    |                 |    |          |    |        |    |        |    |         |    |         |    |              |
| 42 | pa_suivipa                                                                                                   | Your current medical follow-up takes place in the context of :                                                                                                                                                                                                                                                                                                                                               | <p>radio</p> <table border="1"> <tr><td>1</td><td>An episode of cancer</td></tr> <tr><td>2</td><td>An episode of cancer that led to an oncogenetic consultation</td></tr> <tr><td>3</td><td>A consultation in oncogenetic</td></tr> </table> <p>Alignement personnalisé : LV</p>                                                                                                                                                                                                                                                                                                                                                                                                                                                                                                                                                                                                                                               | 1 | An episode of cancer                               | 2 | An episode of cancer that led to an oncogenetic consultation | 3 | A consultation in oncogenetic           |   |                                   |   |                      |   |                                                 |   |                         |   |                                      |   |                        |    |          |    |       |    |          |    |                         |    |                 |    |          |    |        |    |        |    |         |    |         |    |              |
| 1  | An episode of cancer                                                                                         |                                                                                                                                                                                                                                                                                                                                                                                                              |                                                                                                                                                                                                                                                                                                                                                                                                                                                                                                                                                                                                                                                                                                                                                                                                                                                                                                                                |   |                                                    |   |                                                              |   |                                         |   |                                   |   |                      |   |                                                 |   |                         |   |                                      |   |                        |    |          |    |       |    |          |    |                         |    |                 |    |          |    |        |    |        |    |         |    |         |    |              |
| 2  | An episode of cancer that led to an oncogenetic consultation                                                 |                                                                                                                                                                                                                                                                                                                                                                                                              |                                                                                                                                                                                                                                                                                                                                                                                                                                                                                                                                                                                                                                                                                                                                                                                                                                                                                                                                |   |                                                    |   |                                                              |   |                                         |   |                                   |   |                      |   |                                                 |   |                         |   |                                      |   |                        |    |          |    |       |    |          |    |                         |    |                 |    |          |    |        |    |        |    |         |    |         |    |              |
| 3  | A consultation in oncogenetic                                                                                |                                                                                                                                                                                                                                                                                                                                                                                                              |                                                                                                                                                                                                                                                                                                                                                                                                                                                                                                                                                                                                                                                                                                                                                                                                                                                                                                                                |   |                                                    |   |                                                              |   |                                         |   |                                   |   |                      |   |                                                 |   |                         |   |                                      |   |                        |    |          |    |       |    |          |    |                         |    |                 |    |          |    |        |    |        |    |         |    |         |    |              |
| 43 | <p>pa_cancerpa</p> <p>Afficher le champ UNIQUEM ENT si :<br/>[pa_suivipa] = '1' or [pa_suivipa] = '2'</p>    | What is the main type of cancer you are currently being treated for?                                                                                                                                                                                                                                                                                                                                         | <p>radio</p> <table border="1"> <tr><td>1</td><td>Oral cavity</td></tr> <tr><td>2</td><td>Brain</td></tr> <tr><td>3</td><td>Colorectal (colon, rectum)</td></tr> <tr><td>4</td><td>Cervix</td></tr> <tr><td>5</td><td>Endometrium / Uterus</td></tr> <tr><td>6</td><td>Stomach / Esophagus</td></tr> <tr><td>7</td><td>Liver</td></tr> <tr><td>8</td><td>Leukemia</td></tr> <tr><td>9</td><td>Non-Hodgkin's lymphoma</td></tr> <tr><td>10</td><td>Melanoma</td></tr> <tr><td>11</td><td>Ovary</td></tr> <tr><td>12</td><td>Pancreas</td></tr> <tr><td>13</td><td>Skin (without melanoma)</td></tr> <tr><td>14</td><td>Lung / Bronchus</td></tr> <tr><td>15</td><td>Prostate</td></tr> <tr><td>16</td><td>Kidney</td></tr> <tr><td>17</td><td>Breast</td></tr> <tr><td>18</td><td>Thyroid</td></tr> <tr><td>19</td><td>Bladder</td></tr> <tr><td>20</td><td>Other cancer</td></tr> </table> <p>Alignement personnalisé : LV</p> | 1 | Oral cavity                                        | 2 | Brain                                                        | 3 | Colorectal (colon, rectum)              | 4 | Cervix                            | 5 | Endometrium / Uterus | 6 | Stomach / Esophagus                             | 7 | Liver                   | 8 | Leukemia                             | 9 | Non-Hodgkin's lymphoma | 10 | Melanoma | 11 | Ovary | 12 | Pancreas | 13 | Skin (without melanoma) | 14 | Lung / Bronchus | 15 | Prostate | 16 | Kidney | 17 | Breast | 18 | Thyroid | 19 | Bladder | 20 | Other cancer |
| 1  | Oral cavity                                                                                                  |                                                                                                                                                                                                                                                                                                                                                                                                              |                                                                                                                                                                                                                                                                                                                                                                                                                                                                                                                                                                                                                                                                                                                                                                                                                                                                                                                                |   |                                                    |   |                                                              |   |                                         |   |                                   |   |                      |   |                                                 |   |                         |   |                                      |   |                        |    |          |    |       |    |          |    |                         |    |                 |    |          |    |        |    |        |    |         |    |         |    |              |
| 2  | Brain                                                                                                        |                                                                                                                                                                                                                                                                                                                                                                                                              |                                                                                                                                                                                                                                                                                                                                                                                                                                                                                                                                                                                                                                                                                                                                                                                                                                                                                                                                |   |                                                    |   |                                                              |   |                                         |   |                                   |   |                      |   |                                                 |   |                         |   |                                      |   |                        |    |          |    |       |    |          |    |                         |    |                 |    |          |    |        |    |        |    |         |    |         |    |              |
| 3  | Colorectal (colon, rectum)                                                                                   |                                                                                                                                                                                                                                                                                                                                                                                                              |                                                                                                                                                                                                                                                                                                                                                                                                                                                                                                                                                                                                                                                                                                                                                                                                                                                                                                                                |   |                                                    |   |                                                              |   |                                         |   |                                   |   |                      |   |                                                 |   |                         |   |                                      |   |                        |    |          |    |       |    |          |    |                         |    |                 |    |          |    |        |    |        |    |         |    |         |    |              |
| 4  | Cervix                                                                                                       |                                                                                                                                                                                                                                                                                                                                                                                                              |                                                                                                                                                                                                                                                                                                                                                                                                                                                                                                                                                                                                                                                                                                                                                                                                                                                                                                                                |   |                                                    |   |                                                              |   |                                         |   |                                   |   |                      |   |                                                 |   |                         |   |                                      |   |                        |    |          |    |       |    |          |    |                         |    |                 |    |          |    |        |    |        |    |         |    |         |    |              |
| 5  | Endometrium / Uterus                                                                                         |                                                                                                                                                                                                                                                                                                                                                                                                              |                                                                                                                                                                                                                                                                                                                                                                                                                                                                                                                                                                                                                                                                                                                                                                                                                                                                                                                                |   |                                                    |   |                                                              |   |                                         |   |                                   |   |                      |   |                                                 |   |                         |   |                                      |   |                        |    |          |    |       |    |          |    |                         |    |                 |    |          |    |        |    |        |    |         |    |         |    |              |
| 6  | Stomach / Esophagus                                                                                          |                                                                                                                                                                                                                                                                                                                                                                                                              |                                                                                                                                                                                                                                                                                                                                                                                                                                                                                                                                                                                                                                                                                                                                                                                                                                                                                                                                |   |                                                    |   |                                                              |   |                                         |   |                                   |   |                      |   |                                                 |   |                         |   |                                      |   |                        |    |          |    |       |    |          |    |                         |    |                 |    |          |    |        |    |        |    |         |    |         |    |              |
| 7  | Liver                                                                                                        |                                                                                                                                                                                                                                                                                                                                                                                                              |                                                                                                                                                                                                                                                                                                                                                                                                                                                                                                                                                                                                                                                                                                                                                                                                                                                                                                                                |   |                                                    |   |                                                              |   |                                         |   |                                   |   |                      |   |                                                 |   |                         |   |                                      |   |                        |    |          |    |       |    |          |    |                         |    |                 |    |          |    |        |    |        |    |         |    |         |    |              |
| 8  | Leukemia                                                                                                     |                                                                                                                                                                                                                                                                                                                                                                                                              |                                                                                                                                                                                                                                                                                                                                                                                                                                                                                                                                                                                                                                                                                                                                                                                                                                                                                                                                |   |                                                    |   |                                                              |   |                                         |   |                                   |   |                      |   |                                                 |   |                         |   |                                      |   |                        |    |          |    |       |    |          |    |                         |    |                 |    |          |    |        |    |        |    |         |    |         |    |              |
| 9  | Non-Hodgkin's lymphoma                                                                                       |                                                                                                                                                                                                                                                                                                                                                                                                              |                                                                                                                                                                                                                                                                                                                                                                                                                                                                                                                                                                                                                                                                                                                                                                                                                                                                                                                                |   |                                                    |   |                                                              |   |                                         |   |                                   |   |                      |   |                                                 |   |                         |   |                                      |   |                        |    |          |    |       |    |          |    |                         |    |                 |    |          |    |        |    |        |    |         |    |         |    |              |
| 10 | Melanoma                                                                                                     |                                                                                                                                                                                                                                                                                                                                                                                                              |                                                                                                                                                                                                                                                                                                                                                                                                                                                                                                                                                                                                                                                                                                                                                                                                                                                                                                                                |   |                                                    |   |                                                              |   |                                         |   |                                   |   |                      |   |                                                 |   |                         |   |                                      |   |                        |    |          |    |       |    |          |    |                         |    |                 |    |          |    |        |    |        |    |         |    |         |    |              |
| 11 | Ovary                                                                                                        |                                                                                                                                                                                                                                                                                                                                                                                                              |                                                                                                                                                                                                                                                                                                                                                                                                                                                                                                                                                                                                                                                                                                                                                                                                                                                                                                                                |   |                                                    |   |                                                              |   |                                         |   |                                   |   |                      |   |                                                 |   |                         |   |                                      |   |                        |    |          |    |       |    |          |    |                         |    |                 |    |          |    |        |    |        |    |         |    |         |    |              |
| 12 | Pancreas                                                                                                     |                                                                                                                                                                                                                                                                                                                                                                                                              |                                                                                                                                                                                                                                                                                                                                                                                                                                                                                                                                                                                                                                                                                                                                                                                                                                                                                                                                |   |                                                    |   |                                                              |   |                                         |   |                                   |   |                      |   |                                                 |   |                         |   |                                      |   |                        |    |          |    |       |    |          |    |                         |    |                 |    |          |    |        |    |        |    |         |    |         |    |              |
| 13 | Skin (without melanoma)                                                                                      |                                                                                                                                                                                                                                                                                                                                                                                                              |                                                                                                                                                                                                                                                                                                                                                                                                                                                                                                                                                                                                                                                                                                                                                                                                                                                                                                                                |   |                                                    |   |                                                              |   |                                         |   |                                   |   |                      |   |                                                 |   |                         |   |                                      |   |                        |    |          |    |       |    |          |    |                         |    |                 |    |          |    |        |    |        |    |         |    |         |    |              |
| 14 | Lung / Bronchus                                                                                              |                                                                                                                                                                                                                                                                                                                                                                                                              |                                                                                                                                                                                                                                                                                                                                                                                                                                                                                                                                                                                                                                                                                                                                                                                                                                                                                                                                |   |                                                    |   |                                                              |   |                                         |   |                                   |   |                      |   |                                                 |   |                         |   |                                      |   |                        |    |          |    |       |    |          |    |                         |    |                 |    |          |    |        |    |        |    |         |    |         |    |              |
| 15 | Prostate                                                                                                     |                                                                                                                                                                                                                                                                                                                                                                                                              |                                                                                                                                                                                                                                                                                                                                                                                                                                                                                                                                                                                                                                                                                                                                                                                                                                                                                                                                |   |                                                    |   |                                                              |   |                                         |   |                                   |   |                      |   |                                                 |   |                         |   |                                      |   |                        |    |          |    |       |    |          |    |                         |    |                 |    |          |    |        |    |        |    |         |    |         |    |              |
| 16 | Kidney                                                                                                       |                                                                                                                                                                                                                                                                                                                                                                                                              |                                                                                                                                                                                                                                                                                                                                                                                                                                                                                                                                                                                                                                                                                                                                                                                                                                                                                                                                |   |                                                    |   |                                                              |   |                                         |   |                                   |   |                      |   |                                                 |   |                         |   |                                      |   |                        |    |          |    |       |    |          |    |                         |    |                 |    |          |    |        |    |        |    |         |    |         |    |              |
| 17 | Breast                                                                                                       |                                                                                                                                                                                                                                                                                                                                                                                                              |                                                                                                                                                                                                                                                                                                                                                                                                                                                                                                                                                                                                                                                                                                                                                                                                                                                                                                                                |   |                                                    |   |                                                              |   |                                         |   |                                   |   |                      |   |                                                 |   |                         |   |                                      |   |                        |    |          |    |       |    |          |    |                         |    |                 |    |          |    |        |    |        |    |         |    |         |    |              |
| 18 | Thyroid                                                                                                      |                                                                                                                                                                                                                                                                                                                                                                                                              |                                                                                                                                                                                                                                                                                                                                                                                                                                                                                                                                                                                                                                                                                                                                                                                                                                                                                                                                |   |                                                    |   |                                                              |   |                                         |   |                                   |   |                      |   |                                                 |   |                         |   |                                      |   |                        |    |          |    |       |    |          |    |                         |    |                 |    |          |    |        |    |        |    |         |    |         |    |              |
| 19 | Bladder                                                                                                      |                                                                                                                                                                                                                                                                                                                                                                                                              |                                                                                                                                                                                                                                                                                                                                                                                                                                                                                                                                                                                                                                                                                                                                                                                                                                                                                                                                |   |                                                    |   |                                                              |   |                                         |   |                                   |   |                      |   |                                                 |   |                         |   |                                      |   |                        |    |          |    |       |    |          |    |                         |    |                 |    |          |    |        |    |        |    |         |    |         |    |              |
| 20 | Other cancer                                                                                                 |                                                                                                                                                                                                                                                                                                                                                                                                              |                                                                                                                                                                                                                                                                                                                                                                                                                                                                                                                                                                                                                                                                                                                                                                                                                                                                                                                                |   |                                                    |   |                                                              |   |                                         |   |                                   |   |                      |   |                                                 |   |                         |   |                                      |   |                        |    |          |    |       |    |          |    |                         |    |                 |    |          |    |        |    |        |    |         |    |         |    |              |
| 44 | <p>pa_cancerautrepa</p> <p>Afficher le champ UNIQUEM ENT si :<br/>[pa_cancerpa] = '20'</p>                   | If you are currently being followed for a type of cancer other than those listed, please specify which one:                                                                                                                                                                                                                                                                                                  | <p>text</p> <p>Alignement personnalisé : LV</p>                                                                                                                                                                                                                                                                                                                                                                                                                                                                                                                                                                                                                                                                                                                                                                                                                                                                                |   |                                                    |   |                                                              |   |                                         |   |                                   |   |                      |   |                                                 |   |                         |   |                                      |   |                        |    |          |    |       |    |          |    |                         |    |                 |    |          |    |        |    |        |    |         |    |         |    |              |
| 45 | <p>pa_cancernewpa</p> <p>Afficher le champ UNIQUEM ENT si :<br/>[pa_suivipa] = '1' or [pa_suivipa] = '2'</p> | Is this cancer :                                                                                                                                                                                                                                                                                                                                                                                             | <p>radio</p> <table border="1"> <tr><td>1</td><td>A new cancer (a cancer treated for the first time)</td></tr> <tr><td>2</td><td>A recurrence of a cancer treated in the past</td></tr> <tr><td>3</td><td>A second or third cancer</td></tr> <tr><td>4</td><td>Don't know</td></tr> </table> <p>Alignement personnalisé : LV</p>                                                                                                                                                                                                                                                                                                                                                                                                                                                                                                                                                                                               | 1 | A new cancer (a cancer treated for the first time) | 2 | A recurrence of a cancer treated in the past                 | 3 | A second or third cancer                | 4 | Don't know                        |   |                      |   |                                                 |   |                         |   |                                      |   |                        |    |          |    |       |    |          |    |                         |    |                 |    |          |    |        |    |        |    |         |    |         |    |              |
| 1  | A new cancer (a cancer treated for the first time)                                                           |                                                                                                                                                                                                                                                                                                                                                                                                              |                                                                                                                                                                                                                                                                                                                                                                                                                                                                                                                                                                                                                                                                                                                                                                                                                                                                                                                                |   |                                                    |   |                                                              |   |                                         |   |                                   |   |                      |   |                                                 |   |                         |   |                                      |   |                        |    |          |    |       |    |          |    |                         |    |                 |    |          |    |        |    |        |    |         |    |         |    |              |
| 2  | A recurrence of a cancer treated in the past                                                                 |                                                                                                                                                                                                                                                                                                                                                                                                              |                                                                                                                                                                                                                                                                                                                                                                                                                                                                                                                                                                                                                                                                                                                                                                                                                                                                                                                                |   |                                                    |   |                                                              |   |                                         |   |                                   |   |                      |   |                                                 |   |                         |   |                                      |   |                        |    |          |    |       |    |          |    |                         |    |                 |    |          |    |        |    |        |    |         |    |         |    |              |
| 3  | A second or third cancer                                                                                     |                                                                                                                                                                                                                                                                                                                                                                                                              |                                                                                                                                                                                                                                                                                                                                                                                                                                                                                                                                                                                                                                                                                                                                                                                                                                                                                                                                |   |                                                    |   |                                                              |   |                                         |   |                                   |   |                      |   |                                                 |   |                         |   |                                      |   |                        |    |          |    |       |    |          |    |                         |    |                 |    |          |    |        |    |        |    |         |    |         |    |              |
| 4  | Don't know                                                                                                   |                                                                                                                                                                                                                                                                                                                                                                                                              |                                                                                                                                                                                                                                                                                                                                                                                                                                                                                                                                                                                                                                                                                                                                                                                                                                                                                                                                |   |                                                    |   |                                                              |   |                                         |   |                                   |   |                      |   |                                                 |   |                         |   |                                      |   |                        |    |          |    |       |    |          |    |                         |    |                 |    |          |    |        |    |        |    |         |    |         |    |              |

|    |                                                                                                       |                                                                                                                                   |                                                                                                                                                                                                                                                                                                                                                                                                                                                                                                                                                                                                                                                                                                                                                                                                                                                                                                                                                                                                                                                                                                                                                                          |   |                           |                                 |                        |               |                                       |   |                       |                                 |                       |               |                               |   |               |                                                                                        |   |               |                                                         |   |               |                        |   |               |                             |   |               |                                        |    |                |                      |    |                |       |    |                |            |
|----|-------------------------------------------------------------------------------------------------------|-----------------------------------------------------------------------------------------------------------------------------------|--------------------------------------------------------------------------------------------------------------------------------------------------------------------------------------------------------------------------------------------------------------------------------------------------------------------------------------------------------------------------------------------------------------------------------------------------------------------------------------------------------------------------------------------------------------------------------------------------------------------------------------------------------------------------------------------------------------------------------------------------------------------------------------------------------------------------------------------------------------------------------------------------------------------------------------------------------------------------------------------------------------------------------------------------------------------------------------------------------------------------------------------------------------------------|---|---------------------------|---------------------------------|------------------------|---------------|---------------------------------------|---|-----------------------|---------------------------------|-----------------------|---------------|-------------------------------|---|---------------|----------------------------------------------------------------------------------------|---|---------------|---------------------------------------------------------|---|---------------|------------------------|---|---------------|-----------------------------|---|---------------|----------------------------------------|----|----------------|----------------------|----|----------------|-------|----|----------------|------------|
| 46 | pa_cancermetaspa<br>Afficher le champ UNIQUEM<br>ENT si :<br>[pa_suivipa] = '1' or [pa_suivipa] = '2' | Is it a metastatic cancer?                                                                                                        | radio<br><table border="1"> <tr> <td>1</td> <td>Yes</td> </tr> <tr> <td>2</td> <td>No</td> </tr> </table><br>Alignement personnalisé : LV                                                                                                                                                                                                                                                                                                                                                                                                                                                                                                                                                                                                                                                                                                                                                                                                                                                                                                                                                                                                                                | 1 | Yes                       | 2                               | No                     |               |                                       |   |                       |                                 |                       |               |                               |   |               |                                                                                        |   |               |                                                         |   |               |                        |   |               |                             |   |               |                                        |    |                |                      |    |                |       |    |                |            |
| 1  | Yes                                                                                                   |                                                                                                                                   |                                                                                                                                                                                                                                                                                                                                                                                                                                                                                                                                                                                                                                                                                                                                                                                                                                                                                                                                                                                                                                                                                                                                                                          |   |                           |                                 |                        |               |                                       |   |                       |                                 |                       |               |                               |   |               |                                                                                        |   |               |                                                         |   |               |                        |   |               |                             |   |               |                                        |    |                |                      |    |                |       |    |                |            |
| 2  | No                                                                                                    |                                                                                                                                   |                                                                                                                                                                                                                                                                                                                                                                                                                                                                                                                                                                                                                                                                                                                                                                                                                                                                                                                                                                                                                                                                                                                                                                          |   |                           |                                 |                        |               |                                       |   |                       |                                 |                       |               |                               |   |               |                                                                                        |   |               |                                                         |   |               |                        |   |               |                             |   |               |                                        |    |                |                      |    |                |       |    |                |            |
| 47 | pa_canceranpa<br>Afficher le champ UNIQUEM<br>ENT si :<br>[pa_suivipa] = '1' or [pa_suivipa] = '2'    | When were you diagnosed with the cancer you are being treated for now?                                                            | radio<br><table border="1"> <tr> <td>1</td> <td>Less than one month</td> </tr> <tr> <td>2</td> <td>Between 1 and 6 months</td> </tr> <tr> <td>3</td> <td>Between 7 and 11 months</td> </tr> <tr> <td>4</td> <td>Between 1 and 3 years</td> </tr> <tr> <td>5</td> <td>Between 3 and 5 years</td> </tr> <tr> <td>6</td> <td>More than 5 years</td> </tr> <tr> <td>7</td> <td>Don't know</td> </tr> </table><br>Alignement personnalisé : LV                                                                                                                                                                                                                                                                                                                                                                                                                                                                                                                                                                                                                                                                                                                                | 1 | Less than one month       | 2                               | Between 1 and 6 months | 3             | Between 7 and 11 months               | 4 | Between 1 and 3 years | 5                               | Between 3 and 5 years | 6             | More than 5 years             | 7 | Don't know    |                                                                                        |   |               |                                                         |   |               |                        |   |               |                             |   |               |                                        |    |                |                      |    |                |       |    |                |            |
| 1  | Less than one month                                                                                   |                                                                                                                                   |                                                                                                                                                                                                                                                                                                                                                                                                                                                                                                                                                                                                                                                                                                                                                                                                                                                                                                                                                                                                                                                                                                                                                                          |   |                           |                                 |                        |               |                                       |   |                       |                                 |                       |               |                               |   |               |                                                                                        |   |               |                                                         |   |               |                        |   |               |                             |   |               |                                        |    |                |                      |    |                |       |    |                |            |
| 2  | Between 1 and 6 months                                                                                |                                                                                                                                   |                                                                                                                                                                                                                                                                                                                                                                                                                                                                                                                                                                                                                                                                                                                                                                                                                                                                                                                                                                                                                                                                                                                                                                          |   |                           |                                 |                        |               |                                       |   |                       |                                 |                       |               |                               |   |               |                                                                                        |   |               |                                                         |   |               |                        |   |               |                             |   |               |                                        |    |                |                      |    |                |       |    |                |            |
| 3  | Between 7 and 11 months                                                                               |                                                                                                                                   |                                                                                                                                                                                                                                                                                                                                                                                                                                                                                                                                                                                                                                                                                                                                                                                                                                                                                                                                                                                                                                                                                                                                                                          |   |                           |                                 |                        |               |                                       |   |                       |                                 |                       |               |                               |   |               |                                                                                        |   |               |                                                         |   |               |                        |   |               |                             |   |               |                                        |    |                |                      |    |                |       |    |                |            |
| 4  | Between 1 and 3 years                                                                                 |                                                                                                                                   |                                                                                                                                                                                                                                                                                                                                                                                                                                                                                                                                                                                                                                                                                                                                                                                                                                                                                                                                                                                                                                                                                                                                                                          |   |                           |                                 |                        |               |                                       |   |                       |                                 |                       |               |                               |   |               |                                                                                        |   |               |                                                         |   |               |                        |   |               |                             |   |               |                                        |    |                |                      |    |                |       |    |                |            |
| 5  | Between 3 and 5 years                                                                                 |                                                                                                                                   |                                                                                                                                                                                                                                                                                                                                                                                                                                                                                                                                                                                                                                                                                                                                                                                                                                                                                                                                                                                                                                                                                                                                                                          |   |                           |                                 |                        |               |                                       |   |                       |                                 |                       |               |                               |   |               |                                                                                        |   |               |                                                         |   |               |                        |   |               |                             |   |               |                                        |    |                |                      |    |                |       |    |                |            |
| 6  | More than 5 years                                                                                     |                                                                                                                                   |                                                                                                                                                                                                                                                                                                                                                                                                                                                                                                                                                                                                                                                                                                                                                                                                                                                                                                                                                                                                                                                                                                                                                                          |   |                           |                                 |                        |               |                                       |   |                       |                                 |                       |               |                               |   |               |                                                                                        |   |               |                                                         |   |               |                        |   |               |                             |   |               |                                        |    |                |                      |    |                |       |    |                |            |
| 7  | Don't know                                                                                            |                                                                                                                                   |                                                                                                                                                                                                                                                                                                                                                                                                                                                                                                                                                                                                                                                                                                                                                                                                                                                                                                                                                                                                                                                                                                                                                                          |   |                           |                                 |                        |               |                                       |   |                       |                                 |                       |               |                               |   |               |                                                                                        |   |               |                                                         |   |               |                        |   |               |                             |   |               |                                        |    |                |                      |    |                |       |    |                |            |
| 48 | pa_cancer5anpa<br>Afficher le champ UNIQUEM<br>ENT si :<br>[pa_canceranpa] = '6'                      | If you have been diagnosed with cancer for more than 5 years, please specify the number of years.                                 | text (number)<br>Alignement personnalisé : LV                                                                                                                                                                                                                                                                                                                                                                                                                                                                                                                                                                                                                                                                                                                                                                                                                                                                                                                                                                                                                                                                                                                            |   |                           |                                 |                        |               |                                       |   |                       |                                 |                       |               |                               |   |               |                                                                                        |   |               |                                                         |   |               |                        |   |               |                             |   |               |                                        |    |                |                      |    |                |       |    |                |            |
| 49 | pa_trajectpa<br>Afficher le champ UNIQUEM<br>ENT si :<br>[pa_suivipa] = '1' or [pa_suivipa] = '2'     | At the time of answering this questionnaire, what step best describes where you are in your care trajectory to treat this cancer? | radio, Required<br><table border="1"> <tr> <td>1</td> <td>Before starting treatment</td> </tr> <tr> <td>2</td> <td>Treatment in progress</td> </tr> <tr> <td>3</td> <td>Treatment completed</td> </tr> </table><br>Alignement personnalisé : LV                                                                                                                                                                                                                                                                                                                                                                                                                                                                                                                                                                                                                                                                                                                                                                                                                                                                                                                          | 1 | Before starting treatment | 2                               | Treatment in progress  | 3             | Treatment completed                   |   |                       |                                 |                       |               |                               |   |               |                                                                                        |   |               |                                                         |   |               |                        |   |               |                             |   |               |                                        |    |                |                      |    |                |       |    |                |            |
| 1  | Before starting treatment                                                                             |                                                                                                                                   |                                                                                                                                                                                                                                                                                                                                                                                                                                                                                                                                                                                                                                                                                                                                                                                                                                                                                                                                                                                                                                                                                                                                                                          |   |                           |                                 |                        |               |                                       |   |                       |                                 |                       |               |                               |   |               |                                                                                        |   |               |                                                         |   |               |                        |   |               |                             |   |               |                                        |    |                |                      |    |                |       |    |                |            |
| 2  | Treatment in progress                                                                                 |                                                                                                                                   |                                                                                                                                                                                                                                                                                                                                                                                                                                                                                                                                                                                                                                                                                                                                                                                                                                                                                                                                                                                                                                                                                                                                                                          |   |                           |                                 |                        |               |                                       |   |                       |                                 |                       |               |                               |   |               |                                                                                        |   |               |                                                         |   |               |                        |   |               |                             |   |               |                                        |    |                |                      |    |                |       |    |                |            |
| 3  | Treatment completed                                                                                   |                                                                                                                                   |                                                                                                                                                                                                                                                                                                                                                                                                                                                                                                                                                                                                                                                                                                                                                                                                                                                                                                                                                                                                                                                                                                                                                                          |   |                           |                                 |                        |               |                                       |   |                       |                                 |                       |               |                               |   |               |                                                                                        |   |               |                                                         |   |               |                        |   |               |                             |   |               |                                        |    |                |                      |    |                |       |    |                |            |
| 50 | pa_traitpa<br>Afficher le champ UNIQUEM<br>ENT si :<br>[pa_trajectpa] = '2' or [pa_trajectpa] = '3'   | What type of treatment or surgery did you receive (check all that apply)?                                                         | checkbox<br><table border="1"> <tr> <td>1</td> <td>pa_traitpa__1</td> <td>Vein Chemotherapy (Intravenous)</td> </tr> <tr> <td>2</td> <td>pa_traitpa__2</td> <td>Chemotherapy with swallowable tablets</td> </tr> <tr> <td>3</td> <td>pa_traitpa__3</td> <td>Hormonal therapy (antihormones)</td> </tr> <tr> <td>4</td> <td>pa_traitpa__4</td> <td>Radiotherapy or brachytherapy</td> </tr> <tr> <td>5</td> <td>pa_traitpa__5</td> <td>Partial Surgery (remove the tumor while preserving as much healthy tissue as possible)</td> </tr> <tr> <td>6</td> <td>pa_traitpa__6</td> <td>Complete Surgery (completely remove the affected organ)</td> </tr> <tr> <td>7</td> <td>pa_traitpa__7</td> <td>Reconstructive surgery</td> </tr> <tr> <td>8</td> <td>pa_traitpa__8</td> <td>Transplantation or grafting</td> </tr> <tr> <td>9</td> <td>pa_traitpa__9</td> <td>Medication for symptoms (pain, nausea)</td> </tr> <tr> <td>10</td> <td>pa_traitpa__10</td> <td>Alternative Medicine</td> </tr> <tr> <td>11</td> <td>pa_traitpa__11</td> <td>Other</td> </tr> <tr> <td>12</td> <td>pa_traitpa__12</td> <td>Don't know</td> </tr> </table><br>Alignement personnalisé : LV | 1 | pa_traitpa__1             | Vein Chemotherapy (Intravenous) | 2                      | pa_traitpa__2 | Chemotherapy with swallowable tablets | 3 | pa_traitpa__3         | Hormonal therapy (antihormones) | 4                     | pa_traitpa__4 | Radiotherapy or brachytherapy | 5 | pa_traitpa__5 | Partial Surgery (remove the tumor while preserving as much healthy tissue as possible) | 6 | pa_traitpa__6 | Complete Surgery (completely remove the affected organ) | 7 | pa_traitpa__7 | Reconstructive surgery | 8 | pa_traitpa__8 | Transplantation or grafting | 9 | pa_traitpa__9 | Medication for symptoms (pain, nausea) | 10 | pa_traitpa__10 | Alternative Medicine | 11 | pa_traitpa__11 | Other | 12 | pa_traitpa__12 | Don't know |
| 1  | pa_traitpa__1                                                                                         | Vein Chemotherapy (Intravenous)                                                                                                   |                                                                                                                                                                                                                                                                                                                                                                                                                                                                                                                                                                                                                                                                                                                                                                                                                                                                                                                                                                                                                                                                                                                                                                          |   |                           |                                 |                        |               |                                       |   |                       |                                 |                       |               |                               |   |               |                                                                                        |   |               |                                                         |   |               |                        |   |               |                             |   |               |                                        |    |                |                      |    |                |       |    |                |            |
| 2  | pa_traitpa__2                                                                                         | Chemotherapy with swallowable tablets                                                                                             |                                                                                                                                                                                                                                                                                                                                                                                                                                                                                                                                                                                                                                                                                                                                                                                                                                                                                                                                                                                                                                                                                                                                                                          |   |                           |                                 |                        |               |                                       |   |                       |                                 |                       |               |                               |   |               |                                                                                        |   |               |                                                         |   |               |                        |   |               |                             |   |               |                                        |    |                |                      |    |                |       |    |                |            |
| 3  | pa_traitpa__3                                                                                         | Hormonal therapy (antihormones)                                                                                                   |                                                                                                                                                                                                                                                                                                                                                                                                                                                                                                                                                                                                                                                                                                                                                                                                                                                                                                                                                                                                                                                                                                                                                                          |   |                           |                                 |                        |               |                                       |   |                       |                                 |                       |               |                               |   |               |                                                                                        |   |               |                                                         |   |               |                        |   |               |                             |   |               |                                        |    |                |                      |    |                |       |    |                |            |
| 4  | pa_traitpa__4                                                                                         | Radiotherapy or brachytherapy                                                                                                     |                                                                                                                                                                                                                                                                                                                                                                                                                                                                                                                                                                                                                                                                                                                                                                                                                                                                                                                                                                                                                                                                                                                                                                          |   |                           |                                 |                        |               |                                       |   |                       |                                 |                       |               |                               |   |               |                                                                                        |   |               |                                                         |   |               |                        |   |               |                             |   |               |                                        |    |                |                      |    |                |       |    |                |            |
| 5  | pa_traitpa__5                                                                                         | Partial Surgery (remove the tumor while preserving as much healthy tissue as possible)                                            |                                                                                                                                                                                                                                                                                                                                                                                                                                                                                                                                                                                                                                                                                                                                                                                                                                                                                                                                                                                                                                                                                                                                                                          |   |                           |                                 |                        |               |                                       |   |                       |                                 |                       |               |                               |   |               |                                                                                        |   |               |                                                         |   |               |                        |   |               |                             |   |               |                                        |    |                |                      |    |                |       |    |                |            |
| 6  | pa_traitpa__6                                                                                         | Complete Surgery (completely remove the affected organ)                                                                           |                                                                                                                                                                                                                                                                                                                                                                                                                                                                                                                                                                                                                                                                                                                                                                                                                                                                                                                                                                                                                                                                                                                                                                          |   |                           |                                 |                        |               |                                       |   |                       |                                 |                       |               |                               |   |               |                                                                                        |   |               |                                                         |   |               |                        |   |               |                             |   |               |                                        |    |                |                      |    |                |       |    |                |            |
| 7  | pa_traitpa__7                                                                                         | Reconstructive surgery                                                                                                            |                                                                                                                                                                                                                                                                                                                                                                                                                                                                                                                                                                                                                                                                                                                                                                                                                                                                                                                                                                                                                                                                                                                                                                          |   |                           |                                 |                        |               |                                       |   |                       |                                 |                       |               |                               |   |               |                                                                                        |   |               |                                                         |   |               |                        |   |               |                             |   |               |                                        |    |                |                      |    |                |       |    |                |            |
| 8  | pa_traitpa__8                                                                                         | Transplantation or grafting                                                                                                       |                                                                                                                                                                                                                                                                                                                                                                                                                                                                                                                                                                                                                                                                                                                                                                                                                                                                                                                                                                                                                                                                                                                                                                          |   |                           |                                 |                        |               |                                       |   |                       |                                 |                       |               |                               |   |               |                                                                                        |   |               |                                                         |   |               |                        |   |               |                             |   |               |                                        |    |                |                      |    |                |       |    |                |            |
| 9  | pa_traitpa__9                                                                                         | Medication for symptoms (pain, nausea)                                                                                            |                                                                                                                                                                                                                                                                                                                                                                                                                                                                                                                                                                                                                                                                                                                                                                                                                                                                                                                                                                                                                                                                                                                                                                          |   |                           |                                 |                        |               |                                       |   |                       |                                 |                       |               |                               |   |               |                                                                                        |   |               |                                                         |   |               |                        |   |               |                             |   |               |                                        |    |                |                      |    |                |       |    |                |            |
| 10 | pa_traitpa__10                                                                                        | Alternative Medicine                                                                                                              |                                                                                                                                                                                                                                                                                                                                                                                                                                                                                                                                                                                                                                                                                                                                                                                                                                                                                                                                                                                                                                                                                                                                                                          |   |                           |                                 |                        |               |                                       |   |                       |                                 |                       |               |                               |   |               |                                                                                        |   |               |                                                         |   |               |                        |   |               |                             |   |               |                                        |    |                |                      |    |                |       |    |                |            |
| 11 | pa_traitpa__11                                                                                        | Other                                                                                                                             |                                                                                                                                                                                                                                                                                                                                                                                                                                                                                                                                                                                                                                                                                                                                                                                                                                                                                                                                                                                                                                                                                                                                                                          |   |                           |                                 |                        |               |                                       |   |                       |                                 |                       |               |                               |   |               |                                                                                        |   |               |                                                         |   |               |                        |   |               |                             |   |               |                                        |    |                |                      |    |                |       |    |                |            |
| 12 | pa_traitpa__12                                                                                        | Don't know                                                                                                                        |                                                                                                                                                                                                                                                                                                                                                                                                                                                                                                                                                                                                                                                                                                                                                                                                                                                                                                                                                                                                                                                                                                                                                                          |   |                           |                                 |                        |               |                                       |   |                       |                                 |                       |               |                               |   |               |                                                                                        |   |               |                                                         |   |               |                        |   |               |                             |   |               |                                        |    |                |                      |    |                |       |    |                |            |
| 51 | pa_traitautrepa<br>Afficher le champ UNIQUEM<br>ENT si :<br>[pa_traitpa(11)] = '1'                    | If you have received any type of treatment other than those listed, please specify:                                               | text<br>Alignement personnalisé : LV                                                                                                                                                                                                                                                                                                                                                                                                                                                                                                                                                                                                                                                                                                                                                                                                                                                                                                                                                                                                                                                                                                                                     |   |                           |                                 |                        |               |                                       |   |                       |                                 |                       |               |                               |   |               |                                                                                        |   |               |                                                         |   |               |                        |   |               |                             |   |               |                                        |    |                |                      |    |                |       |    |                |            |

|    |                                                                                                                                                                                                                                                                                                                                              |                                                                                                                        |                                                                                                                                                                                                                                                                                                                                                                                                                                                                              |   |                                                                                                                                                                                                                                                                                                                                              |   |                                                            |   |                                                                                            |   |                                                                                     |   |                           |   |                       |   |            |
|----|----------------------------------------------------------------------------------------------------------------------------------------------------------------------------------------------------------------------------------------------------------------------------------------------------------------------------------------------|------------------------------------------------------------------------------------------------------------------------|------------------------------------------------------------------------------------------------------------------------------------------------------------------------------------------------------------------------------------------------------------------------------------------------------------------------------------------------------------------------------------------------------------------------------------------------------------------------------|---|----------------------------------------------------------------------------------------------------------------------------------------------------------------------------------------------------------------------------------------------------------------------------------------------------------------------------------------------|---|------------------------------------------------------------|---|--------------------------------------------------------------------------------------------|---|-------------------------------------------------------------------------------------|---|---------------------------|---|-----------------------|---|------------|
| 52 | <p>pa_traitdebutpa</p> <p>Afficher le champ UNIQUEM ENT si :<br/>[pa_trajectpa] = '2' or [pa_trajectpa] = '3'</p>                                                                                                                                                                                                                            | This (or these) treatment(s) was (or were) started:                                                                    | <p>radio</p> <table border="1"> <tr><td>1</td><td>less than a month ago</td></tr> <tr><td>2</td><td>between 1 and 6 months ago</td></tr> <tr><td>3</td><td>between 7 and 11 months ago</td></tr> <tr><td>4</td><td>between 1 and 3 years</td></tr> <tr><td>5</td><td>between 3 and 5 years</td></tr> <tr><td>6</td><td>more than 5 years ago</td></tr> <tr><td>7</td><td>Don't know</td></tr> </table> <p>Alignement personnalisé : LV</p>                                   | 1 | less than a month ago                                                                                                                                                                                                                                                                                                                        | 2 | between 1 and 6 months ago                                 | 3 | between 7 and 11 months ago                                                                | 4 | between 1 and 3 years                                                               | 5 | between 3 and 5 years     | 6 | more than 5 years ago | 7 | Don't know |
| 1  | less than a month ago                                                                                                                                                                                                                                                                                                                        |                                                                                                                        |                                                                                                                                                                                                                                                                                                                                                                                                                                                                              |   |                                                                                                                                                                                                                                                                                                                                              |   |                                                            |   |                                                                                            |   |                                                                                     |   |                           |   |                       |   |            |
| 2  | between 1 and 6 months ago                                                                                                                                                                                                                                                                                                                   |                                                                                                                        |                                                                                                                                                                                                                                                                                                                                                                                                                                                                              |   |                                                                                                                                                                                                                                                                                                                                              |   |                                                            |   |                                                                                            |   |                                                                                     |   |                           |   |                       |   |            |
| 3  | between 7 and 11 months ago                                                                                                                                                                                                                                                                                                                  |                                                                                                                        |                                                                                                                                                                                                                                                                                                                                                                                                                                                                              |   |                                                                                                                                                                                                                                                                                                                                              |   |                                                            |   |                                                                                            |   |                                                                                     |   |                           |   |                       |   |            |
| 4  | between 1 and 3 years                                                                                                                                                                                                                                                                                                                        |                                                                                                                        |                                                                                                                                                                                                                                                                                                                                                                                                                                                                              |   |                                                                                                                                                                                                                                                                                                                                              |   |                                                            |   |                                                                                            |   |                                                                                     |   |                           |   |                       |   |            |
| 5  | between 3 and 5 years                                                                                                                                                                                                                                                                                                                        |                                                                                                                        |                                                                                                                                                                                                                                                                                                                                                                                                                                                                              |   |                                                                                                                                                                                                                                                                                                                                              |   |                                                            |   |                                                                                            |   |                                                                                     |   |                           |   |                       |   |            |
| 6  | more than 5 years ago                                                                                                                                                                                                                                                                                                                        |                                                                                                                        |                                                                                                                                                                                                                                                                                                                                                                                                                                                                              |   |                                                                                                                                                                                                                                                                                                                                              |   |                                                            |   |                                                                                            |   |                                                                                     |   |                           |   |                       |   |            |
| 7  | Don't know                                                                                                                                                                                                                                                                                                                                   |                                                                                                                        |                                                                                                                                                                                                                                                                                                                                                                                                                                                                              |   |                                                                                                                                                                                                                                                                                                                                              |   |                                                            |   |                                                                                            |   |                                                                                     |   |                           |   |                       |   |            |
| 53 | <p>pa_traitdebut5pa</p> <p>Afficher le champ UNIQUEM ENT si :<br/>[pa_traitdebutpa] = '6'</p>                                                                                                                                                                                                                                                | If your treatments began more than 5 years ago, please indicate the number of years.                                   | <p>text</p> <p>Alignement personnalisé : LV</p>                                                                                                                                                                                                                                                                                                                                                                                                                              |   |                                                                                                                                                                                                                                                                                                                                              |   |                                                            |   |                                                                                            |   |                                                                                     |   |                           |   |                       |   |            |
| 54 | <p>pa_genetiquepa</p> <p>Afficher le champ UNIQUEM ENT si :<br/>[pa_suivipa] = '1'</p>                                                                                                                                                                                                                                                       | Have you consulted in oncogenetic or undergone genetic testing to find out your hereditary predisposition to cancer?   | <p>radio</p> <table border="1"> <tr><td>1</td><td>Yes</td></tr> <tr><td>2</td><td>No</td></tr> <tr><td>3</td><td>Don't know</td></tr> </table> <p>Alignement personnalisé : LV</p>                                                                                                                                                                                                                                                                                           | 1 | Yes                                                                                                                                                                                                                                                                                                                                          | 2 | No                                                         | 3 | Don't know                                                                                 |   |                                                                                     |   |                           |   |                       |   |            |
| 1  | Yes                                                                                                                                                                                                                                                                                                                                          |                                                                                                                        |                                                                                                                                                                                                                                                                                                                                                                                                                                                                              |   |                                                                                                                                                                                                                                                                                                                                              |   |                                                            |   |                                                                                            |   |                                                                                     |   |                           |   |                       |   |            |
| 2  | No                                                                                                                                                                                                                                                                                                                                           |                                                                                                                        |                                                                                                                                                                                                                                                                                                                                                                                                                                                                              |   |                                                                                                                                                                                                                                                                                                                                              |   |                                                            |   |                                                                                            |   |                                                                                     |   |                           |   |                       |   |            |
| 3  | Don't know                                                                                                                                                                                                                                                                                                                                   |                                                                                                                        |                                                                                                                                                                                                                                                                                                                                                                                                                                                                              |   |                                                                                                                                                                                                                                                                                                                                              |   |                                                            |   |                                                                                            |   |                                                                                     |   |                           |   |                       |   |            |
| 55 | <p>pa_bidon7</p> <p>Afficher le champ UNIQUEM ENT si :<br/>[pa_suivipa] = '3' or [pa_suivipa] = '2' or [pa_genetiquepa] = "1"</p>                                                                                                                                                                                                            | YOUR MEDICAL FOLLOW-UP TOOK PLACE IN THE CONTEXT OF AN ONCOGENETIC CONSULTATION                                        | <p>descriptive</p> <table border="1"> <tr><td>1</td><td>Décision thérapeutique (décision chirurgicale ou thérapie ciblée) 2, Pour connaitre mon statut génétique à la suite d'un diagnostic de cancer 3, Pour connaitre mon statut génétique suite à l'identification d'une mutation génétique dans la famille 4, Pour connaitre mon statut génétique en raison de mon historique familial de cancer</td></tr> </table>                                                      | 1 | Décision thérapeutique (décision chirurgicale ou thérapie ciblée) 2, Pour connaitre mon statut génétique à la suite d'un diagnostic de cancer 3, Pour connaitre mon statut génétique suite à l'identification d'une mutation génétique dans la famille 4, Pour connaitre mon statut génétique en raison de mon historique familial de cancer |   |                                                            |   |                                                                                            |   |                                                                                     |   |                           |   |                       |   |            |
| 1  | Décision thérapeutique (décision chirurgicale ou thérapie ciblée) 2, Pour connaitre mon statut génétique à la suite d'un diagnostic de cancer 3, Pour connaitre mon statut génétique suite à l'identification d'une mutation génétique dans la famille 4, Pour connaitre mon statut génétique en raison de mon historique familial de cancer |                                                                                                                        |                                                                                                                                                                                                                                                                                                                                                                                                                                                                              |   |                                                                                                                                                                                                                                                                                                                                              |   |                                                            |   |                                                                                            |   |                                                                                     |   |                           |   |                       |   |            |
| 56 | <p>pa_motifgenpa</p> <p>Afficher le champ UNIQUEM ENT si :<br/>[pa_suivipa] = '3' or [pa_suivipa] = '2' or [pa_genetiquepa] = "1"</p>                                                                                                                                                                                                        | Why are you undergoing oncogenetic consultation OR genetic testing?                                                    | <p>radio</p> <table border="1"> <tr><td>1</td><td>Therapeutic decision (surgical decision or targeted therapy)</td></tr> <tr><td>2</td><td>To find out my genetic status following a cancer diagnosis</td></tr> <tr><td>3</td><td>To know my genetic status following the identification of a genetic mutation in the family</td></tr> <tr><td>4</td><td>To know my genetic status due to my family history of cancer</td></tr> </table> <p>Alignement personnalisé : LV</p> | 1 | Therapeutic decision (surgical decision or targeted therapy)                                                                                                                                                                                                                                                                                 | 2 | To find out my genetic status following a cancer diagnosis | 3 | To know my genetic status following the identification of a genetic mutation in the family | 4 | To know my genetic status due to my family history of cancer                        |   |                           |   |                       |   |            |
| 1  | Therapeutic decision (surgical decision or targeted therapy)                                                                                                                                                                                                                                                                                 |                                                                                                                        |                                                                                                                                                                                                                                                                                                                                                                                                                                                                              |   |                                                                                                                                                                                                                                                                                                                                              |   |                                                            |   |                                                                                            |   |                                                                                     |   |                           |   |                       |   |            |
| 2  | To find out my genetic status following a cancer diagnosis                                                                                                                                                                                                                                                                                   |                                                                                                                        |                                                                                                                                                                                                                                                                                                                                                                                                                                                                              |   |                                                                                                                                                                                                                                                                                                                                              |   |                                                            |   |                                                                                            |   |                                                                                     |   |                           |   |                       |   |            |
| 3  | To know my genetic status following the identification of a genetic mutation in the family                                                                                                                                                                                                                                                   |                                                                                                                        |                                                                                                                                                                                                                                                                                                                                                                                                                                                                              |   |                                                                                                                                                                                                                                                                                                                                              |   |                                                            |   |                                                                                            |   |                                                                                     |   |                           |   |                       |   |            |
| 4  | To know my genetic status due to my family history of cancer                                                                                                                                                                                                                                                                                 |                                                                                                                        |                                                                                                                                                                                                                                                                                                                                                                                                                                                                              |   |                                                                                                                                                                                                                                                                                                                                              |   |                                                            |   |                                                                                            |   |                                                                                     |   |                           |   |                       |   |            |
| 57 | <p>pa_oncogenpa</p> <p>Afficher le champ UNIQUEM ENT si :<br/>[pa_suivipa] = '3' or [pa_suivipa] = '2' or [pa_genetiquepa] = "1"</p>                                                                                                                                                                                                         | At the time of answering this questionnaire, what step best describes where you are in your trajectory in oncogenetic? | <p>radio</p> <table border="1"> <tr><td>1</td><td>You have just attended an information meeting in oncogenetic</td></tr> <tr><td>2</td><td>You are waiting for the result of your genetic test</td></tr> <tr><td>3</td><td>You have just received your genetic test result.</td></tr> <tr><td>4</td><td>You are a carrier of a genetic mutation and you are considering preventive surgery.</td></tr> </table> <p>Alignement personnalisé : LV</p>                           | 1 | You have just attended an information meeting in oncogenetic                                                                                                                                                                                                                                                                                 | 2 | You are waiting for the result of your genetic test        | 3 | You have just received your genetic test result.                                           | 4 | You are a carrier of a genetic mutation and you are considering preventive surgery. |   |                           |   |                       |   |            |
| 1  | You have just attended an information meeting in oncogenetic                                                                                                                                                                                                                                                                                 |                                                                                                                        |                                                                                                                                                                                                                                                                                                                                                                                                                                                                              |   |                                                                                                                                                                                                                                                                                                                                              |   |                                                            |   |                                                                                            |   |                                                                                     |   |                           |   |                       |   |            |
| 2  | You are waiting for the result of your genetic test                                                                                                                                                                                                                                                                                          |                                                                                                                        |                                                                                                                                                                                                                                                                                                                                                                                                                                                                              |   |                                                                                                                                                                                                                                                                                                                                              |   |                                                            |   |                                                                                            |   |                                                                                     |   |                           |   |                       |   |            |
| 3  | You have just received your genetic test result.                                                                                                                                                                                                                                                                                             |                                                                                                                        |                                                                                                                                                                                                                                                                                                                                                                                                                                                                              |   |                                                                                                                                                                                                                                                                                                                                              |   |                                                            |   |                                                                                            |   |                                                                                     |   |                           |   |                       |   |            |
| 4  | You are a carrier of a genetic mutation and you are considering preventive surgery.                                                                                                                                                                                                                                                          |                                                                                                                        |                                                                                                                                                                                                                                                                                                                                                                                                                                                                              |   |                                                                                                                                                                                                                                                                                                                                              |   |                                                            |   |                                                                                            |   |                                                                                     |   |                           |   |                       |   |            |
| 58 | <p>pa_resultdatepa</p> <p>Afficher le champ UNIQUEM ENT si :<br/>[pa_oncogenpa] = '3' or [pa_oncogenpa] = '4'</p>                                                                                                                                                                                                                            | You received your genetic test result :                                                                                | <p>radio</p> <table border="1"> <tr><td>1</td><td>Less than 1 month ago</td></tr> <tr><td>2</td><td>Between 1 and 6 months ago</td></tr> <tr><td>3</td><td>Between 7 and 11 months ago</td></tr> <tr><td>4</td><td>Between 1 and 3 years ago</td></tr> <tr><td>5</td><td>Between 3 and 5 years ago</td></tr> <tr><td>6</td><td>More than 5 years ago</td></tr> <tr><td>7</td><td>Don't know</td></tr> </table> <p>Alignement personnalisé : LV</p>                           | 1 | Less than 1 month ago                                                                                                                                                                                                                                                                                                                        | 2 | Between 1 and 6 months ago                                 | 3 | Between 7 and 11 months ago                                                                | 4 | Between 1 and 3 years ago                                                           | 5 | Between 3 and 5 years ago | 6 | More than 5 years ago | 7 | Don't know |
| 1  | Less than 1 month ago                                                                                                                                                                                                                                                                                                                        |                                                                                                                        |                                                                                                                                                                                                                                                                                                                                                                                                                                                                              |   |                                                                                                                                                                                                                                                                                                                                              |   |                                                            |   |                                                                                            |   |                                                                                     |   |                           |   |                       |   |            |
| 2  | Between 1 and 6 months ago                                                                                                                                                                                                                                                                                                                   |                                                                                                                        |                                                                                                                                                                                                                                                                                                                                                                                                                                                                              |   |                                                                                                                                                                                                                                                                                                                                              |   |                                                            |   |                                                                                            |   |                                                                                     |   |                           |   |                       |   |            |
| 3  | Between 7 and 11 months ago                                                                                                                                                                                                                                                                                                                  |                                                                                                                        |                                                                                                                                                                                                                                                                                                                                                                                                                                                                              |   |                                                                                                                                                                                                                                                                                                                                              |   |                                                            |   |                                                                                            |   |                                                                                     |   |                           |   |                       |   |            |
| 4  | Between 1 and 3 years ago                                                                                                                                                                                                                                                                                                                    |                                                                                                                        |                                                                                                                                                                                                                                                                                                                                                                                                                                                                              |   |                                                                                                                                                                                                                                                                                                                                              |   |                                                            |   |                                                                                            |   |                                                                                     |   |                           |   |                       |   |            |
| 5  | Between 3 and 5 years ago                                                                                                                                                                                                                                                                                                                    |                                                                                                                        |                                                                                                                                                                                                                                                                                                                                                                                                                                                                              |   |                                                                                                                                                                                                                                                                                                                                              |   |                                                            |   |                                                                                            |   |                                                                                     |   |                           |   |                       |   |            |
| 6  | More than 5 years ago                                                                                                                                                                                                                                                                                                                        |                                                                                                                        |                                                                                                                                                                                                                                                                                                                                                                                                                                                                              |   |                                                                                                                                                                                                                                                                                                                                              |   |                                                            |   |                                                                                            |   |                                                                                     |   |                           |   |                       |   |            |
| 7  | Don't know                                                                                                                                                                                                                                                                                                                                   |                                                                                                                        |                                                                                                                                                                                                                                                                                                                                                                                                                                                                              |   |                                                                                                                                                                                                                                                                                                                                              |   |                                                            |   |                                                                                            |   |                                                                                     |   |                           |   |                       |   |            |

|    |                                                                                                        |                                                                                                                                                     |                                                                                                                                                                                                                                                                                                                                                                                                                                                                                                                                                                  |   |                                          |                                               |                                      |              |                                                              |   |                |                                         |   |              |                         |   |              |                   |   |              |       |
|----|--------------------------------------------------------------------------------------------------------|-----------------------------------------------------------------------------------------------------------------------------------------------------|------------------------------------------------------------------------------------------------------------------------------------------------------------------------------------------------------------------------------------------------------------------------------------------------------------------------------------------------------------------------------------------------------------------------------------------------------------------------------------------------------------------------------------------------------------------|---|------------------------------------------|-----------------------------------------------|--------------------------------------|--------------|--------------------------------------------------------------|---|----------------|-----------------------------------------|---|--------------|-------------------------|---|--------------|-------------------|---|--------------|-------|
| 59 | pa_result5pa<br>Afficher le champ UNIQUEM<br>ENT si :<br>[pa_resultdatepa] = '6'                       | If you received your result more than 5 years ago, please indicate the number of years.                                                             | text<br>Alignement personnalisé : LV                                                                                                                                                                                                                                                                                                                                                                                                                                                                                                                             |   |                                          |                                               |                                      |              |                                                              |   |                |                                         |   |              |                         |   |              |                   |   |              |       |
| 60 | pa_mastectpa<br>Afficher le champ UNIQUEM<br>ENT si :<br>[pa_oncogenpa] = '3' or [pa_oncogenpa] = '4'  | Have you had or are you considering having a preventative mastectomy (breast removal) to reduce your risk of breast cancer?                         | radio<br><table border="1"> <tr><td>0</td><td>Yes, I had this surgery</td></tr> <tr><td>1</td><td>Yes, I am considering this surgery</td></tr> <tr><td>2</td><td>No, I have not had this surgery and I am not considering it.</td></tr> <tr><td>3</td><td>Not applicable</td></tr> </table><br>Alignement personnalisé : LV                                                                                                                                                                                                                                      | 0 | Yes, I had this surgery                  | 1                                             | Yes, I am considering this surgery   | 2            | No, I have not had this surgery and I am not considering it. | 3 | Not applicable |                                         |   |              |                         |   |              |                   |   |              |       |
| 0  | Yes, I had this surgery                                                                                |                                                                                                                                                     |                                                                                                                                                                                                                                                                                                                                                                                                                                                                                                                                                                  |   |                                          |                                               |                                      |              |                                                              |   |                |                                         |   |              |                         |   |              |                   |   |              |       |
| 1  | Yes, I am considering this surgery                                                                     |                                                                                                                                                     |                                                                                                                                                                                                                                                                                                                                                                                                                                                                                                                                                                  |   |                                          |                                               |                                      |              |                                                              |   |                |                                         |   |              |                         |   |              |                   |   |              |       |
| 2  | No, I have not had this surgery and I am not considering it.                                           |                                                                                                                                                     |                                                                                                                                                                                                                                                                                                                                                                                                                                                                                                                                                                  |   |                                          |                                               |                                      |              |                                                              |   |                |                                         |   |              |                         |   |              |                   |   |              |       |
| 3  | Not applicable                                                                                         |                                                                                                                                                     |                                                                                                                                                                                                                                                                                                                                                                                                                                                                                                                                                                  |   |                                          |                                               |                                      |              |                                                              |   |                |                                         |   |              |                         |   |              |                   |   |              |       |
| 61 | pa_mastectanpa<br>Afficher le champ UNIQUEM<br>ENT si :<br>[pa_mastectpa] = '0'                        | In what year did you have your preventive mastectomy?                                                                                               | text<br>Alignement personnalisé : LV                                                                                                                                                                                                                                                                                                                                                                                                                                                                                                                             |   |                                          |                                               |                                      |              |                                                              |   |                |                                         |   |              |                         |   |              |                   |   |              |       |
| 62 | pa_reconstpa<br>Afficher le champ UNIQUEM<br>ENT si :<br>[pa_mastectpa] = '0'                          | Have you had a breast reconstruction?                                                                                                               | radio<br><table border="1"> <tr><td>1</td><td>Yes</td></tr> <tr><td>2</td><td>No</td></tr> </table><br>Alignement personnalisé : LV                                                                                                                                                                                                                                                                                                                                                                                                                              | 1 | Yes                                      | 2                                             | No                                   |              |                                                              |   |                |                                         |   |              |                         |   |              |                   |   |              |       |
| 1  | Yes                                                                                                    |                                                                                                                                                     |                                                                                                                                                                                                                                                                                                                                                                                                                                                                                                                                                                  |   |                                          |                                               |                                      |              |                                                              |   |                |                                         |   |              |                         |   |              |                   |   |              |       |
| 2  | No                                                                                                     |                                                                                                                                                     |                                                                                                                                                                                                                                                                                                                                                                                                                                                                                                                                                                  |   |                                          |                                               |                                      |              |                                                              |   |                |                                         |   |              |                         |   |              |                   |   |              |       |
| 63 | pa_reconsttypepa<br>Afficher le champ UNIQUEM<br>ENT si :<br>[pa_reconstpa] = '1'                      | What type of breast reconstruction have you had?                                                                                                    | radio<br><table border="1"> <tr><td>1</td><td>Reconstruction by adding breast implants</td></tr> <tr><td>2</td><td>Reconstruction from your own tissues</td></tr> <tr><td>3</td><td>Don't know</td></tr> </table><br>Alignement personnalisé : LV                                                                                                                                                                                                                                                                                                                | 1 | Reconstruction by adding breast implants | 2                                             | Reconstruction from your own tissues | 3            | Don't know                                                   |   |                |                                         |   |              |                         |   |              |                   |   |              |       |
| 1  | Reconstruction by adding breast implants                                                               |                                                                                                                                                     |                                                                                                                                                                                                                                                                                                                                                                                                                                                                                                                                                                  |   |                                          |                                               |                                      |              |                                                              |   |                |                                         |   |              |                         |   |              |                   |   |              |       |
| 2  | Reconstruction from your own tissues                                                                   |                                                                                                                                                     |                                                                                                                                                                                                                                                                                                                                                                                                                                                                                                                                                                  |   |                                          |                                               |                                      |              |                                                              |   |                |                                         |   |              |                         |   |              |                   |   |              |       |
| 3  | Don't know                                                                                             |                                                                                                                                                     |                                                                                                                                                                                                                                                                                                                                                                                                                                                                                                                                                                  |   |                                          |                                               |                                      |              |                                                              |   |                |                                         |   |              |                         |   |              |                   |   |              |       |
| 64 | pa_ovariectpa<br>Afficher le champ UNIQUEM<br>ENT si :<br>[pa_oncogenpa] = '3' or [pa_oncogenpa] = '4' | Have you had or are you considering preventive bilateral salpingo ovariectomy (removal of ovaries and tubes) to reduce your risk of ovarian cancer? | radio<br><table border="1"> <tr><td>0</td><td>Yes, I had this surgery</td></tr> <tr><td>1</td><td>Yes, I am considering this surgery</td></tr> <tr><td>2</td><td>No, I have not had this surgery and I am not considering it.</td></tr> <tr><td>3</td><td>Not applicable</td></tr> </table><br>Alignement personnalisé : LV                                                                                                                                                                                                                                      | 0 | Yes, I had this surgery                  | 1                                             | Yes, I am considering this surgery   | 2            | No, I have not had this surgery and I am not considering it. | 3 | Not applicable |                                         |   |              |                         |   |              |                   |   |              |       |
| 0  | Yes, I had this surgery                                                                                |                                                                                                                                                     |                                                                                                                                                                                                                                                                                                                                                                                                                                                                                                                                                                  |   |                                          |                                               |                                      |              |                                                              |   |                |                                         |   |              |                         |   |              |                   |   |              |       |
| 1  | Yes, I am considering this surgery                                                                     |                                                                                                                                                     |                                                                                                                                                                                                                                                                                                                                                                                                                                                                                                                                                                  |   |                                          |                                               |                                      |              |                                                              |   |                |                                         |   |              |                         |   |              |                   |   |              |       |
| 2  | No, I have not had this surgery and I am not considering it.                                           |                                                                                                                                                     |                                                                                                                                                                                                                                                                                                                                                                                                                                                                                                                                                                  |   |                                          |                                               |                                      |              |                                                              |   |                |                                         |   |              |                         |   |              |                   |   |              |       |
| 3  | Not applicable                                                                                         |                                                                                                                                                     |                                                                                                                                                                                                                                                                                                                                                                                                                                                                                                                                                                  |   |                                          |                                               |                                      |              |                                                              |   |                |                                         |   |              |                         |   |              |                   |   |              |       |
| 65 | pa_ovariectanpa<br>Afficher le champ UNIQUEM<br>ENT si :<br>[pa_ovariectpa] = '0'                      | In what year did you have your preventive ovariectomy?                                                                                              | text<br>Alignement personnalisé : LV                                                                                                                                                                                                                                                                                                                                                                                                                                                                                                                             |   |                                          |                                               |                                      |              |                                                              |   |                |                                         |   |              |                         |   |              |                   |   |              |       |
| 66 | pa_infopa                                                                                              | During your meetings with the health care team, the information provided allowed you to fully understand:                                           | checkbox<br><table border="1"> <tr><td>1</td><td>pa_infopa__1</td><td>Your condition (stakes, diagnosis, evolution)</td></tr> <tr><td>2</td><td>pa_infopa__2</td><td>Your examinations (tests and investigations)</td></tr> <tr><td>3</td><td>pa_infopa__3</td><td>Your options, benefits and side effects</td></tr> <tr><td>4</td><td>pa_infopa__4</td><td>Your follow-up and care</td></tr> <tr><td>5</td><td>pa_infopa__5</td><td>None of the above</td></tr> <tr><td>6</td><td>pa_infopa__6</td><td>Other</td></tr> </table><br>Alignement personnalisé : LV | 1 | pa_infopa__1                             | Your condition (stakes, diagnosis, evolution) | 2                                    | pa_infopa__2 | Your examinations (tests and investigations)                 | 3 | pa_infopa__3   | Your options, benefits and side effects | 4 | pa_infopa__4 | Your follow-up and care | 5 | pa_infopa__5 | None of the above | 6 | pa_infopa__6 | Other |
| 1  | pa_infopa__1                                                                                           | Your condition (stakes, diagnosis, evolution)                                                                                                       |                                                                                                                                                                                                                                                                                                                                                                                                                                                                                                                                                                  |   |                                          |                                               |                                      |              |                                                              |   |                |                                         |   |              |                         |   |              |                   |   |              |       |
| 2  | pa_infopa__2                                                                                           | Your examinations (tests and investigations)                                                                                                        |                                                                                                                                                                                                                                                                                                                                                                                                                                                                                                                                                                  |   |                                          |                                               |                                      |              |                                                              |   |                |                                         |   |              |                         |   |              |                   |   |              |       |
| 3  | pa_infopa__3                                                                                           | Your options, benefits and side effects                                                                                                             |                                                                                                                                                                                                                                                                                                                                                                                                                                                                                                                                                                  |   |                                          |                                               |                                      |              |                                                              |   |                |                                         |   |              |                         |   |              |                   |   |              |       |
| 4  | pa_infopa__4                                                                                           | Your follow-up and care                                                                                                                             |                                                                                                                                                                                                                                                                                                                                                                                                                                                                                                                                                                  |   |                                          |                                               |                                      |              |                                                              |   |                |                                         |   |              |                         |   |              |                   |   |              |       |
| 5  | pa_infopa__5                                                                                           | None of the above                                                                                                                                   |                                                                                                                                                                                                                                                                                                                                                                                                                                                                                                                                                                  |   |                                          |                                               |                                      |              |                                                              |   |                |                                         |   |              |                         |   |              |                   |   |              |       |
| 6  | pa_infopa__6                                                                                           | Other                                                                                                                                               |                                                                                                                                                                                                                                                                                                                                                                                                                                                                                                                                                                  |   |                                          |                                               |                                      |              |                                                              |   |                |                                         |   |              |                         |   |              |                   |   |              |       |
| 67 | pa_infoautrepa<br>Afficher le champ UNIQUEM<br>ENT si :<br>[pa_infopa(6)] = '1'                        | If you checked "Other", please specify.                                                                                                             | text<br>Alignement personnalisé : LV                                                                                                                                                                                                                                                                                                                                                                                                                                                                                                                             |   |                                          |                                               |                                      |              |                                                              |   |                |                                         |   |              |                         |   |              |                   |   |              |       |
| 68 | patients_care_experience_questionnaire_complete                                                        | En-tête de section : <i>Form Status</i><br>Complete?                                                                                                | dropdown<br><table border="1"> <tr><td>0</td><td>Incomplete</td></tr> <tr><td>1</td><td>Unverified</td></tr> <tr><td>2</td><td>Complete</td></tr> </table>                                                                                                                                                                                                                                                                                                                                                                                                       | 0 | Incomplete                               | 1                                             | Unverified                           | 2            | Complete                                                     |   |                |                                         |   |              |                         |   |              |                   |   |              |       |
| 0  | Incomplete                                                                                             |                                                                                                                                                     |                                                                                                                                                                                                                                                                                                                                                                                                                                                                                                                                                                  |   |                                          |                                               |                                      |              |                                                              |   |                |                                         |   |              |                         |   |              |                   |   |              |       |
| 1  | Unverified                                                                                             |                                                                                                                                                     |                                                                                                                                                                                                                                                                                                                                                                                                                                                                                                                                                                  |   |                                          |                                               |                                      |              |                                                              |   |                |                                         |   |              |                         |   |              |                   |   |              |       |
| 2  | Complete                                                                                               |                                                                                                                                                     |                                                                                                                                                                                                                                                                                                                                                                                                                                                                                                                                                                  |   |                                          |                                               |                                      |              |                                                              |   |                |                                         |   |              |                         |   |              |                   |   |              |       |

|          |                                                                                     |                                                                                                                                                                                                                                            |                                                                                                                                                                                                                                                                                                                                                                                                                                                                                                                                                                                                                                                                                                                                                                                                                                                                                                                                                                                                             |          |     |   |                                       |                |                                   |   |                |                                                 |   |                |                                                 |   |                |                     |   |                |                                                                  |   |                |                                              |   |                |                                                              |   |                |                                  |   |                |                   |
|----------|-------------------------------------------------------------------------------------|--------------------------------------------------------------------------------------------------------------------------------------------------------------------------------------------------------------------------------------------|-------------------------------------------------------------------------------------------------------------------------------------------------------------------------------------------------------------------------------------------------------------------------------------------------------------------------------------------------------------------------------------------------------------------------------------------------------------------------------------------------------------------------------------------------------------------------------------------------------------------------------------------------------------------------------------------------------------------------------------------------------------------------------------------------------------------------------------------------------------------------------------------------------------------------------------------------------------------------------------------------------------|----------|-----|---|---------------------------------------|----------------|-----------------------------------|---|----------------|-------------------------------------------------|---|----------------|-------------------------------------------------|---|----------------|---------------------|---|----------------|------------------------------------------------------------------|---|----------------|----------------------------------------------|---|----------------|--------------------------------------------------------------|---|----------------|----------------------------------|---|----------------|-------------------|
| 69       | pa_jumelage                                                                         | Have you ever been accompanied by someone (this may be one or more meetings) who has had the same experience as you (cancer, surgery or genetic testing experience)? In health care settings, these people are called "patients advisors". | <table border="1"> <tr> <td>0</td> <td>Yes</td> </tr> <tr> <td>1</td> <td>Not yet but I wish to benefit from it</td> </tr> <tr> <td>2</td> <td>No and I don't think I need it</td> </tr> </table> <p>Alignement personnalisé : LV</p>                                                                                                                                                                                                                                                                                                                                                                                                                                                                                                                                                                                                                                                                                                                                                                       | 0        | Yes | 1 | Not yet but I wish to benefit from it | 2              | No and I don't think I need it    |   |                |                                                 |   |                |                                                 |   |                |                     |   |                |                                                                  |   |                |                                              |   |                |                                                              |   |                |                                  |   |                |                   |
| 0        | Yes                                                                                 |                                                                                                                                                                                                                                            |                                                                                                                                                                                                                                                                                                                                                                                                                                                                                                                                                                                                                                                                                                                                                                                                                                                                                                                                                                                                             |          |     |   |                                       |                |                                   |   |                |                                                 |   |                |                                                 |   |                |                     |   |                |                                                                  |   |                |                                              |   |                |                                                              |   |                |                                  |   |                |                   |
| 1        | Not yet but I wish to benefit from it                                               |                                                                                                                                                                                                                                            |                                                                                                                                                                                                                                                                                                                                                                                                                                                                                                                                                                                                                                                                                                                                                                                                                                                                                                                                                                                                             |          |     |   |                                       |                |                                   |   |                |                                                 |   |                |                                                 |   |                |                     |   |                |                                                                  |   |                |                                              |   |                |                                                              |   |                |                                  |   |                |                   |
| 2        | No and I don't think I need it                                                      |                                                                                                                                                                                                                                            |                                                                                                                                                                                                                                                                                                                                                                                                                                                                                                                                                                                                                                                                                                                                                                                                                                                                                                                                                                                                             |          |     |   |                                       |                |                                   |   |                |                                                 |   |                |                                                 |   |                |                     |   |                |                                                                  |   |                |                                              |   |                |                                                              |   |                |                                  |   |                |                   |
| 70       | pa_bidon2_v2_v2<br>Afficher le champ UNIQUEM<br>ENT si :<br>[pa_jumelage] = '0'     | What topics did you discuss with the patient advisor?<br>(Check all that apply)                                                                                                                                                            | descriptive                                                                                                                                                                                                                                                                                                                                                                                                                                                                                                                                                                                                                                                                                                                                                                                                                                                                                                                                                                                                 |          |     |   |                                       |                |                                   |   |                |                                                 |   |                |                                                 |   |                |                     |   |                |                                                                  |   |                |                                              |   |                |                                                              |   |                |                                  |   |                |                   |
| 71       | pa_themeorg<br>Afficher le champ UNIQUEM<br>ENT si :<br>[pa_jumelage] = '0'         | Organizational aspects                                                                                                                                                                                                                     | <table border="1"> <tr> <td colspan="3">checkbox</td> </tr> <tr> <td>0</td> <td>pa_themeorg__0</td> <td>Her/His role as a patient advisor</td> </tr> <tr> <td>1</td> <td>pa_themeorg__1</td> <td>The role of different health care professionals</td> </tr> <tr> <td>2</td> <td>pa_themeorg__2</td> <td>The role of external and internal organizations</td> </tr> <tr> <td>3</td> <td>pa_themeorg__3</td> <td>The care trajectory</td> </tr> <tr> <td>4</td> <td>pa_themeorg__4</td> <td>Rights as a patient (e.g., refusing treatment, asking questions)</td> </tr> <tr> <td>5</td> <td>pa_themeorg__5</td> <td>Where and how to get to medical appointments</td> </tr> <tr> <td>6</td> <td>pa_themeorg__6</td> <td>Financial support for patients and transportation assistance</td> </tr> <tr> <td>7</td> <td>pa_themeorg__7</td> <td>The Parole-Onco Research Project</td> </tr> <tr> <td>8</td> <td>pa_themeorg__8</td> <td>Other information</td> </tr> </table> <p>Alignement personnalisé : LV</p> | checkbox |     |   | 0                                     | pa_themeorg__0 | Her/His role as a patient advisor | 1 | pa_themeorg__1 | The role of different health care professionals | 2 | pa_themeorg__2 | The role of external and internal organizations | 3 | pa_themeorg__3 | The care trajectory | 4 | pa_themeorg__4 | Rights as a patient (e.g., refusing treatment, asking questions) | 5 | pa_themeorg__5 | Where and how to get to medical appointments | 6 | pa_themeorg__6 | Financial support for patients and transportation assistance | 7 | pa_themeorg__7 | The Parole-Onco Research Project | 8 | pa_themeorg__8 | Other information |
| checkbox |                                                                                     |                                                                                                                                                                                                                                            |                                                                                                                                                                                                                                                                                                                                                                                                                                                                                                                                                                                                                                                                                                                                                                                                                                                                                                                                                                                                             |          |     |   |                                       |                |                                   |   |                |                                                 |   |                |                                                 |   |                |                     |   |                |                                                                  |   |                |                                              |   |                |                                                              |   |                |                                  |   |                |                   |
| 0        | pa_themeorg__0                                                                      | Her/His role as a patient advisor                                                                                                                                                                                                          |                                                                                                                                                                                                                                                                                                                                                                                                                                                                                                                                                                                                                                                                                                                                                                                                                                                                                                                                                                                                             |          |     |   |                                       |                |                                   |   |                |                                                 |   |                |                                                 |   |                |                     |   |                |                                                                  |   |                |                                              |   |                |                                                              |   |                |                                  |   |                |                   |
| 1        | pa_themeorg__1                                                                      | The role of different health care professionals                                                                                                                                                                                            |                                                                                                                                                                                                                                                                                                                                                                                                                                                                                                                                                                                                                                                                                                                                                                                                                                                                                                                                                                                                             |          |     |   |                                       |                |                                   |   |                |                                                 |   |                |                                                 |   |                |                     |   |                |                                                                  |   |                |                                              |   |                |                                                              |   |                |                                  |   |                |                   |
| 2        | pa_themeorg__2                                                                      | The role of external and internal organizations                                                                                                                                                                                            |                                                                                                                                                                                                                                                                                                                                                                                                                                                                                                                                                                                                                                                                                                                                                                                                                                                                                                                                                                                                             |          |     |   |                                       |                |                                   |   |                |                                                 |   |                |                                                 |   |                |                     |   |                |                                                                  |   |                |                                              |   |                |                                                              |   |                |                                  |   |                |                   |
| 3        | pa_themeorg__3                                                                      | The care trajectory                                                                                                                                                                                                                        |                                                                                                                                                                                                                                                                                                                                                                                                                                                                                                                                                                                                                                                                                                                                                                                                                                                                                                                                                                                                             |          |     |   |                                       |                |                                   |   |                |                                                 |   |                |                                                 |   |                |                     |   |                |                                                                  |   |                |                                              |   |                |                                                              |   |                |                                  |   |                |                   |
| 4        | pa_themeorg__4                                                                      | Rights as a patient (e.g., refusing treatment, asking questions)                                                                                                                                                                           |                                                                                                                                                                                                                                                                                                                                                                                                                                                                                                                                                                                                                                                                                                                                                                                                                                                                                                                                                                                                             |          |     |   |                                       |                |                                   |   |                |                                                 |   |                |                                                 |   |                |                     |   |                |                                                                  |   |                |                                              |   |                |                                                              |   |                |                                  |   |                |                   |
| 5        | pa_themeorg__5                                                                      | Where and how to get to medical appointments                                                                                                                                                                                               |                                                                                                                                                                                                                                                                                                                                                                                                                                                                                                                                                                                                                                                                                                                                                                                                                                                                                                                                                                                                             |          |     |   |                                       |                |                                   |   |                |                                                 |   |                |                                                 |   |                |                     |   |                |                                                                  |   |                |                                              |   |                |                                                              |   |                |                                  |   |                |                   |
| 6        | pa_themeorg__6                                                                      | Financial support for patients and transportation assistance                                                                                                                                                                               |                                                                                                                                                                                                                                                                                                                                                                                                                                                                                                                                                                                                                                                                                                                                                                                                                                                                                                                                                                                                             |          |     |   |                                       |                |                                   |   |                |                                                 |   |                |                                                 |   |                |                     |   |                |                                                                  |   |                |                                              |   |                |                                                              |   |                |                                  |   |                |                   |
| 7        | pa_themeorg__7                                                                      | The Parole-Onco Research Project                                                                                                                                                                                                           |                                                                                                                                                                                                                                                                                                                                                                                                                                                                                                                                                                                                                                                                                                                                                                                                                                                                                                                                                                                                             |          |     |   |                                       |                |                                   |   |                |                                                 |   |                |                                                 |   |                |                     |   |                |                                                                  |   |                |                                              |   |                |                                                              |   |                |                                  |   |                |                   |
| 8        | pa_themeorg__8                                                                      | Other information                                                                                                                                                                                                                          |                                                                                                                                                                                                                                                                                                                                                                                                                                                                                                                                                                                                                                                                                                                                                                                                                                                                                                                                                                                                             |          |     |   |                                       |                |                                   |   |                |                                                 |   |                |                                                 |   |                |                     |   |                |                                                                  |   |                |                                              |   |                |                                                              |   |                |                                  |   |                |                   |
| 72       | pa_asp_org_autre<br>Afficher le champ UNIQUEM<br>ENT si :<br>[pa_themeorg(8)] = '1' | If other information, please specify which one:                                                                                                                                                                                            | text<br>Alignement personnalisé : LV                                                                                                                                                                                                                                                                                                                                                                                                                                                                                                                                                                                                                                                                                                                                                                                                                                                                                                                                                                        |          |     |   |                                       |                |                                   |   |                |                                                 |   |                |                                                 |   |                |                     |   |                |                                                                  |   |                |                                              |   |                |                                                              |   |                |                                  |   |                |                   |

|    |                                                                                       |                                                                                      |                                                                                                                                                                                                                                                                                                                                                                                                                                                                                                                                                                                                                                                                                                                                                                                                                                                                                                                                                                                                                                                                                                                                                                                                                                                                                                                                                                                                                                                                                                                                                                                                                                                                                                                                                      |   |                |                                                                                  |   |                |        |   |                |                 |   |                |                                           |   |                |                                                                                      |   |                |                                                |   |                |                 |   |                |                 |   |                |                     |   |                |                                         |    |                 |                              |    |                 |                                     |    |                 |                                   |    |                 |                   |    |                 |                               |    |                 |                                               |    |                 |                           |    |                 |                   |
|----|---------------------------------------------------------------------------------------|--------------------------------------------------------------------------------------|------------------------------------------------------------------------------------------------------------------------------------------------------------------------------------------------------------------------------------------------------------------------------------------------------------------------------------------------------------------------------------------------------------------------------------------------------------------------------------------------------------------------------------------------------------------------------------------------------------------------------------------------------------------------------------------------------------------------------------------------------------------------------------------------------------------------------------------------------------------------------------------------------------------------------------------------------------------------------------------------------------------------------------------------------------------------------------------------------------------------------------------------------------------------------------------------------------------------------------------------------------------------------------------------------------------------------------------------------------------------------------------------------------------------------------------------------------------------------------------------------------------------------------------------------------------------------------------------------------------------------------------------------------------------------------------------------------------------------------------------------|---|----------------|----------------------------------------------------------------------------------|---|----------------|--------|---|----------------|-----------------|---|----------------|-------------------------------------------|---|----------------|--------------------------------------------------------------------------------------|---|----------------|------------------------------------------------|---|----------------|-----------------|---|----------------|-----------------|---|----------------|---------------------|---|----------------|-----------------------------------------|----|-----------------|------------------------------|----|-----------------|-------------------------------------|----|-----------------|-----------------------------------|----|-----------------|-------------------|----|-----------------|-------------------------------|----|-----------------|-----------------------------------------------|----|-----------------|---------------------------|----|-----------------|-------------------|
| 73 | pa_themecli<br>Afficher le champ UNIQUEM<br>ENT si :<br>[pa_jumelage] = '0'           | Clinical aspects                                                                     | checkbox<br><table border="1"> <tr> <td>0</td> <td>pa_themecli__0</td> <td>The announcement of the cancer diagnosis or genetic predisposition by the doctor</td> </tr> <tr> <td>1</td> <td>pa_themecli__1</td> <td>Cancer</td> </tr> <tr> <td>2</td> <td>pa_themecli__2</td> <td>Genetic testing</td> </tr> <tr> <td>3</td> <td>pa_themecli__3</td> <td>Therapeutic options in the case of cancer</td> </tr> <tr> <td>4</td> <td>pa_themecli__4</td> <td>Ways to reduce risk in carriers of a gene mutation that increases the risk of cancer</td> </tr> <tr> <td>5</td> <td>pa_themecli__5</td> <td>Surgical and reconstructive options for cancer</td> </tr> <tr> <td>6</td> <td>pa_themecli__6</td> <td>Breast implants</td> </tr> <tr> <td>7</td> <td>pa_themecli__7</td> <td>Hormonal issues</td> </tr> <tr> <td>8</td> <td>pa_themecli__8</td> <td>Reproductive issues</td> </tr> <tr> <td>9</td> <td>pa_themecli__9</td> <td>Urinary and erectile dysfunction issues</td> </tr> <tr> <td>10</td> <td>pa_themecli__10</td> <td>Fatigue following treatments</td> </tr> <tr> <td>11</td> <td>pa_themecli__11</td> <td>Pain and discomfort after treatment</td> </tr> <tr> <td>12</td> <td>pa_themecli__12</td> <td>Pain and discomfort after surgery</td> </tr> <tr> <td>13</td> <td>pa_themecli__13</td> <td>Possible emotions</td> </tr> <tr> <td>14</td> <td>pa_themecli__14</td> <td>Stress and anxiety management</td> </tr> <tr> <td>15</td> <td>pa_themecli__15</td> <td>Impact on physical appearance and self-esteem</td> </tr> <tr> <td>16</td> <td>pa_themecli__16</td> <td>Decision-making processes</td> </tr> <tr> <td>17</td> <td>pa_themecli__17</td> <td>Other information</td> </tr> </table><br>Alignement personnalisé : LV | 0 | pa_themecli__0 | The announcement of the cancer diagnosis or genetic predisposition by the doctor | 1 | pa_themecli__1 | Cancer | 2 | pa_themecli__2 | Genetic testing | 3 | pa_themecli__3 | Therapeutic options in the case of cancer | 4 | pa_themecli__4 | Ways to reduce risk in carriers of a gene mutation that increases the risk of cancer | 5 | pa_themecli__5 | Surgical and reconstructive options for cancer | 6 | pa_themecli__6 | Breast implants | 7 | pa_themecli__7 | Hormonal issues | 8 | pa_themecli__8 | Reproductive issues | 9 | pa_themecli__9 | Urinary and erectile dysfunction issues | 10 | pa_themecli__10 | Fatigue following treatments | 11 | pa_themecli__11 | Pain and discomfort after treatment | 12 | pa_themecli__12 | Pain and discomfort after surgery | 13 | pa_themecli__13 | Possible emotions | 14 | pa_themecli__14 | Stress and anxiety management | 15 | pa_themecli__15 | Impact on physical appearance and self-esteem | 16 | pa_themecli__16 | Decision-making processes | 17 | pa_themecli__17 | Other information |
| 0  | pa_themecli__0                                                                        | The announcement of the cancer diagnosis or genetic predisposition by the doctor     |                                                                                                                                                                                                                                                                                                                                                                                                                                                                                                                                                                                                                                                                                                                                                                                                                                                                                                                                                                                                                                                                                                                                                                                                                                                                                                                                                                                                                                                                                                                                                                                                                                                                                                                                                      |   |                |                                                                                  |   |                |        |   |                |                 |   |                |                                           |   |                |                                                                                      |   |                |                                                |   |                |                 |   |                |                 |   |                |                     |   |                |                                         |    |                 |                              |    |                 |                                     |    |                 |                                   |    |                 |                   |    |                 |                               |    |                 |                                               |    |                 |                           |    |                 |                   |
| 1  | pa_themecli__1                                                                        | Cancer                                                                               |                                                                                                                                                                                                                                                                                                                                                                                                                                                                                                                                                                                                                                                                                                                                                                                                                                                                                                                                                                                                                                                                                                                                                                                                                                                                                                                                                                                                                                                                                                                                                                                                                                                                                                                                                      |   |                |                                                                                  |   |                |        |   |                |                 |   |                |                                           |   |                |                                                                                      |   |                |                                                |   |                |                 |   |                |                 |   |                |                     |   |                |                                         |    |                 |                              |    |                 |                                     |    |                 |                                   |    |                 |                   |    |                 |                               |    |                 |                                               |    |                 |                           |    |                 |                   |
| 2  | pa_themecli__2                                                                        | Genetic testing                                                                      |                                                                                                                                                                                                                                                                                                                                                                                                                                                                                                                                                                                                                                                                                                                                                                                                                                                                                                                                                                                                                                                                                                                                                                                                                                                                                                                                                                                                                                                                                                                                                                                                                                                                                                                                                      |   |                |                                                                                  |   |                |        |   |                |                 |   |                |                                           |   |                |                                                                                      |   |                |                                                |   |                |                 |   |                |                 |   |                |                     |   |                |                                         |    |                 |                              |    |                 |                                     |    |                 |                                   |    |                 |                   |    |                 |                               |    |                 |                                               |    |                 |                           |    |                 |                   |
| 3  | pa_themecli__3                                                                        | Therapeutic options in the case of cancer                                            |                                                                                                                                                                                                                                                                                                                                                                                                                                                                                                                                                                                                                                                                                                                                                                                                                                                                                                                                                                                                                                                                                                                                                                                                                                                                                                                                                                                                                                                                                                                                                                                                                                                                                                                                                      |   |                |                                                                                  |   |                |        |   |                |                 |   |                |                                           |   |                |                                                                                      |   |                |                                                |   |                |                 |   |                |                 |   |                |                     |   |                |                                         |    |                 |                              |    |                 |                                     |    |                 |                                   |    |                 |                   |    |                 |                               |    |                 |                                               |    |                 |                           |    |                 |                   |
| 4  | pa_themecli__4                                                                        | Ways to reduce risk in carriers of a gene mutation that increases the risk of cancer |                                                                                                                                                                                                                                                                                                                                                                                                                                                                                                                                                                                                                                                                                                                                                                                                                                                                                                                                                                                                                                                                                                                                                                                                                                                                                                                                                                                                                                                                                                                                                                                                                                                                                                                                                      |   |                |                                                                                  |   |                |        |   |                |                 |   |                |                                           |   |                |                                                                                      |   |                |                                                |   |                |                 |   |                |                 |   |                |                     |   |                |                                         |    |                 |                              |    |                 |                                     |    |                 |                                   |    |                 |                   |    |                 |                               |    |                 |                                               |    |                 |                           |    |                 |                   |
| 5  | pa_themecli__5                                                                        | Surgical and reconstructive options for cancer                                       |                                                                                                                                                                                                                                                                                                                                                                                                                                                                                                                                                                                                                                                                                                                                                                                                                                                                                                                                                                                                                                                                                                                                                                                                                                                                                                                                                                                                                                                                                                                                                                                                                                                                                                                                                      |   |                |                                                                                  |   |                |        |   |                |                 |   |                |                                           |   |                |                                                                                      |   |                |                                                |   |                |                 |   |                |                 |   |                |                     |   |                |                                         |    |                 |                              |    |                 |                                     |    |                 |                                   |    |                 |                   |    |                 |                               |    |                 |                                               |    |                 |                           |    |                 |                   |
| 6  | pa_themecli__6                                                                        | Breast implants                                                                      |                                                                                                                                                                                                                                                                                                                                                                                                                                                                                                                                                                                                                                                                                                                                                                                                                                                                                                                                                                                                                                                                                                                                                                                                                                                                                                                                                                                                                                                                                                                                                                                                                                                                                                                                                      |   |                |                                                                                  |   |                |        |   |                |                 |   |                |                                           |   |                |                                                                                      |   |                |                                                |   |                |                 |   |                |                 |   |                |                     |   |                |                                         |    |                 |                              |    |                 |                                     |    |                 |                                   |    |                 |                   |    |                 |                               |    |                 |                                               |    |                 |                           |    |                 |                   |
| 7  | pa_themecli__7                                                                        | Hormonal issues                                                                      |                                                                                                                                                                                                                                                                                                                                                                                                                                                                                                                                                                                                                                                                                                                                                                                                                                                                                                                                                                                                                                                                                                                                                                                                                                                                                                                                                                                                                                                                                                                                                                                                                                                                                                                                                      |   |                |                                                                                  |   |                |        |   |                |                 |   |                |                                           |   |                |                                                                                      |   |                |                                                |   |                |                 |   |                |                 |   |                |                     |   |                |                                         |    |                 |                              |    |                 |                                     |    |                 |                                   |    |                 |                   |    |                 |                               |    |                 |                                               |    |                 |                           |    |                 |                   |
| 8  | pa_themecli__8                                                                        | Reproductive issues                                                                  |                                                                                                                                                                                                                                                                                                                                                                                                                                                                                                                                                                                                                                                                                                                                                                                                                                                                                                                                                                                                                                                                                                                                                                                                                                                                                                                                                                                                                                                                                                                                                                                                                                                                                                                                                      |   |                |                                                                                  |   |                |        |   |                |                 |   |                |                                           |   |                |                                                                                      |   |                |                                                |   |                |                 |   |                |                 |   |                |                     |   |                |                                         |    |                 |                              |    |                 |                                     |    |                 |                                   |    |                 |                   |    |                 |                               |    |                 |                                               |    |                 |                           |    |                 |                   |
| 9  | pa_themecli__9                                                                        | Urinary and erectile dysfunction issues                                              |                                                                                                                                                                                                                                                                                                                                                                                                                                                                                                                                                                                                                                                                                                                                                                                                                                                                                                                                                                                                                                                                                                                                                                                                                                                                                                                                                                                                                                                                                                                                                                                                                                                                                                                                                      |   |                |                                                                                  |   |                |        |   |                |                 |   |                |                                           |   |                |                                                                                      |   |                |                                                |   |                |                 |   |                |                 |   |                |                     |   |                |                                         |    |                 |                              |    |                 |                                     |    |                 |                                   |    |                 |                   |    |                 |                               |    |                 |                                               |    |                 |                           |    |                 |                   |
| 10 | pa_themecli__10                                                                       | Fatigue following treatments                                                         |                                                                                                                                                                                                                                                                                                                                                                                                                                                                                                                                                                                                                                                                                                                                                                                                                                                                                                                                                                                                                                                                                                                                                                                                                                                                                                                                                                                                                                                                                                                                                                                                                                                                                                                                                      |   |                |                                                                                  |   |                |        |   |                |                 |   |                |                                           |   |                |                                                                                      |   |                |                                                |   |                |                 |   |                |                 |   |                |                     |   |                |                                         |    |                 |                              |    |                 |                                     |    |                 |                                   |    |                 |                   |    |                 |                               |    |                 |                                               |    |                 |                           |    |                 |                   |
| 11 | pa_themecli__11                                                                       | Pain and discomfort after treatment                                                  |                                                                                                                                                                                                                                                                                                                                                                                                                                                                                                                                                                                                                                                                                                                                                                                                                                                                                                                                                                                                                                                                                                                                                                                                                                                                                                                                                                                                                                                                                                                                                                                                                                                                                                                                                      |   |                |                                                                                  |   |                |        |   |                |                 |   |                |                                           |   |                |                                                                                      |   |                |                                                |   |                |                 |   |                |                 |   |                |                     |   |                |                                         |    |                 |                              |    |                 |                                     |    |                 |                                   |    |                 |                   |    |                 |                               |    |                 |                                               |    |                 |                           |    |                 |                   |
| 12 | pa_themecli__12                                                                       | Pain and discomfort after surgery                                                    |                                                                                                                                                                                                                                                                                                                                                                                                                                                                                                                                                                                                                                                                                                                                                                                                                                                                                                                                                                                                                                                                                                                                                                                                                                                                                                                                                                                                                                                                                                                                                                                                                                                                                                                                                      |   |                |                                                                                  |   |                |        |   |                |                 |   |                |                                           |   |                |                                                                                      |   |                |                                                |   |                |                 |   |                |                 |   |                |                     |   |                |                                         |    |                 |                              |    |                 |                                     |    |                 |                                   |    |                 |                   |    |                 |                               |    |                 |                                               |    |                 |                           |    |                 |                   |
| 13 | pa_themecli__13                                                                       | Possible emotions                                                                    |                                                                                                                                                                                                                                                                                                                                                                                                                                                                                                                                                                                                                                                                                                                                                                                                                                                                                                                                                                                                                                                                                                                                                                                                                                                                                                                                                                                                                                                                                                                                                                                                                                                                                                                                                      |   |                |                                                                                  |   |                |        |   |                |                 |   |                |                                           |   |                |                                                                                      |   |                |                                                |   |                |                 |   |                |                 |   |                |                     |   |                |                                         |    |                 |                              |    |                 |                                     |    |                 |                                   |    |                 |                   |    |                 |                               |    |                 |                                               |    |                 |                           |    |                 |                   |
| 14 | pa_themecli__14                                                                       | Stress and anxiety management                                                        |                                                                                                                                                                                                                                                                                                                                                                                                                                                                                                                                                                                                                                                                                                                                                                                                                                                                                                                                                                                                                                                                                                                                                                                                                                                                                                                                                                                                                                                                                                                                                                                                                                                                                                                                                      |   |                |                                                                                  |   |                |        |   |                |                 |   |                |                                           |   |                |                                                                                      |   |                |                                                |   |                |                 |   |                |                 |   |                |                     |   |                |                                         |    |                 |                              |    |                 |                                     |    |                 |                                   |    |                 |                   |    |                 |                               |    |                 |                                               |    |                 |                           |    |                 |                   |
| 15 | pa_themecli__15                                                                       | Impact on physical appearance and self-esteem                                        |                                                                                                                                                                                                                                                                                                                                                                                                                                                                                                                                                                                                                                                                                                                                                                                                                                                                                                                                                                                                                                                                                                                                                                                                                                                                                                                                                                                                                                                                                                                                                                                                                                                                                                                                                      |   |                |                                                                                  |   |                |        |   |                |                 |   |                |                                           |   |                |                                                                                      |   |                |                                                |   |                |                 |   |                |                 |   |                |                     |   |                |                                         |    |                 |                              |    |                 |                                     |    |                 |                                   |    |                 |                   |    |                 |                               |    |                 |                                               |    |                 |                           |    |                 |                   |
| 16 | pa_themecli__16                                                                       | Decision-making processes                                                            |                                                                                                                                                                                                                                                                                                                                                                                                                                                                                                                                                                                                                                                                                                                                                                                                                                                                                                                                                                                                                                                                                                                                                                                                                                                                                                                                                                                                                                                                                                                                                                                                                                                                                                                                                      |   |                |                                                                                  |   |                |        |   |                |                 |   |                |                                           |   |                |                                                                                      |   |                |                                                |   |                |                 |   |                |                 |   |                |                     |   |                |                                         |    |                 |                              |    |                 |                                     |    |                 |                                   |    |                 |                   |    |                 |                               |    |                 |                                               |    |                 |                           |    |                 |                   |
| 17 | pa_themecli__17                                                                       | Other information                                                                    |                                                                                                                                                                                                                                                                                                                                                                                                                                                                                                                                                                                                                                                                                                                                                                                                                                                                                                                                                                                                                                                                                                                                                                                                                                                                                                                                                                                                                                                                                                                                                                                                                                                                                                                                                      |   |                |                                                                                  |   |                |        |   |                |                 |   |                |                                           |   |                |                                                                                      |   |                |                                                |   |                |                 |   |                |                 |   |                |                     |   |                |                                         |    |                 |                              |    |                 |                                     |    |                 |                                   |    |                 |                   |    |                 |                               |    |                 |                                               |    |                 |                           |    |                 |                   |
| 74 | pa_aspcclin_autre<br>Afficher le champ UNIQUEM<br>ENT si :<br>[pa_themecli(17)] = '1' | If other information, please specify which one:                                      | text<br>Alignement personnalisé : LV                                                                                                                                                                                                                                                                                                                                                                                                                                                                                                                                                                                                                                                                                                                                                                                                                                                                                                                                                                                                                                                                                                                                                                                                                                                                                                                                                                                                                                                                                                                                                                                                                                                                                                                 |   |                |                                                                                  |   |                |        |   |                |                 |   |                |                                           |   |                |                                                                                      |   |                |                                                |   |                |                 |   |                |                 |   |                |                     |   |                |                                         |    |                 |                              |    |                 |                                     |    |                 |                                   |    |                 |                   |    |                 |                               |    |                 |                                               |    |                 |                           |    |                 |                   |

|    |                                                                                          |                                                                                                                                         |                                                                                                                                                                                                                                                                                                                                                                                                                                                                                                                                                                                                                                                                                                                                                                                                                                                                                                                                                                                                                                                                                                                                                                                                                                                                                                                                                                                                              |   |                |                                                                                                        |   |                |                                                                   |   |                |                                                                                                                                         |   |                |                                                                               |   |                |                                                             |   |                |                                                                |   |                |                                        |   |                |                                                |   |                |                        |   |                |                           |    |                 |                                   |    |                 |                                            |    |                 |                                                             |    |                 |                                        |    |                 |                   |
|----|------------------------------------------------------------------------------------------|-----------------------------------------------------------------------------------------------------------------------------------------|--------------------------------------------------------------------------------------------------------------------------------------------------------------------------------------------------------------------------------------------------------------------------------------------------------------------------------------------------------------------------------------------------------------------------------------------------------------------------------------------------------------------------------------------------------------------------------------------------------------------------------------------------------------------------------------------------------------------------------------------------------------------------------------------------------------------------------------------------------------------------------------------------------------------------------------------------------------------------------------------------------------------------------------------------------------------------------------------------------------------------------------------------------------------------------------------------------------------------------------------------------------------------------------------------------------------------------------------------------------------------------------------------------------|---|----------------|--------------------------------------------------------------------------------------------------------|---|----------------|-------------------------------------------------------------------|---|----------------|-----------------------------------------------------------------------------------------------------------------------------------------|---|----------------|-------------------------------------------------------------------------------|---|----------------|-------------------------------------------------------------|---|----------------|----------------------------------------------------------------|---|----------------|----------------------------------------|---|----------------|------------------------------------------------|---|----------------|------------------------|---|----------------|---------------------------|----|-----------------|-----------------------------------|----|-----------------|--------------------------------------------|----|-----------------|-------------------------------------------------------------|----|-----------------|----------------------------------------|----|-----------------|-------------------|
| 75 | pa_themequo<br>Afficher le champ UNIQUEM<br>ENT si :<br>[pa_jumelage] = '0'              | Consequences on daily life                                                                                                              | checkbox <table border="1" data-bbox="1023 107 1493 1032"> <tr><td>0</td><td>pa_themequo__0</td><td>Consequences on daily life</td></tr> <tr><td>1</td><td>pa_themequo__1</td><td>Consequences on children</td></tr> <tr><td>2</td><td>pa_themequo__2</td><td>Consequences on conjugal life</td></tr> <tr><td>3</td><td>pa_themequo__3</td><td>Consequences on sexual life</td></tr> <tr><td>4</td><td>pa_themequo__4</td><td>Returning to work</td></tr> <tr><td>5</td><td>pa_themequo__5</td><td>The return to daily life</td></tr> <tr><td>6</td><td>pa_themequo__6</td><td>The consequences on the spiritual life</td></tr> <tr><td>7</td><td>pa_themequo__7</td><td>How to announce a diagnosis to your loved ones</td></tr> <tr><td>8</td><td>pa_themequo__8</td><td>Financial implications</td></tr> <tr><td>9</td><td>pa_themequo__9</td><td>Consequences on insurance</td></tr> <tr><td>10</td><td>pa_themequo__10</td><td>Consequences on professional life</td></tr> <tr><td>11</td><td>pa_themequo__11</td><td>Social perception (the reaction of others)</td></tr> <tr><td>12</td><td>pa_themequo__12</td><td>Strategies for living the treatments in the best conditions</td></tr> <tr><td>13</td><td>pa_themequo__13</td><td>How to regain control over the disease</td></tr> <tr><td>14</td><td>pa_themequo__14</td><td>Other information</td></tr> </table><br>Alignement personnalisé : LV | 0 | pa_themequo__0 | Consequences on daily life                                                                             | 1 | pa_themequo__1 | Consequences on children                                          | 2 | pa_themequo__2 | Consequences on conjugal life                                                                                                           | 3 | pa_themequo__3 | Consequences on sexual life                                                   | 4 | pa_themequo__4 | Returning to work                                           | 5 | pa_themequo__5 | The return to daily life                                       | 6 | pa_themequo__6 | The consequences on the spiritual life | 7 | pa_themequo__7 | How to announce a diagnosis to your loved ones | 8 | pa_themequo__8 | Financial implications | 9 | pa_themequo__9 | Consequences on insurance | 10 | pa_themequo__10 | Consequences on professional life | 11 | pa_themequo__11 | Social perception (the reaction of others) | 12 | pa_themequo__12 | Strategies for living the treatments in the best conditions | 13 | pa_themequo__13 | How to regain control over the disease | 14 | pa_themequo__14 | Other information |
| 0  | pa_themequo__0                                                                           | Consequences on daily life                                                                                                              |                                                                                                                                                                                                                                                                                                                                                                                                                                                                                                                                                                                                                                                                                                                                                                                                                                                                                                                                                                                                                                                                                                                                                                                                                                                                                                                                                                                                              |   |                |                                                                                                        |   |                |                                                                   |   |                |                                                                                                                                         |   |                |                                                                               |   |                |                                                             |   |                |                                                                |   |                |                                        |   |                |                                                |   |                |                        |   |                |                           |    |                 |                                   |    |                 |                                            |    |                 |                                                             |    |                 |                                        |    |                 |                   |
| 1  | pa_themequo__1                                                                           | Consequences on children                                                                                                                |                                                                                                                                                                                                                                                                                                                                                                                                                                                                                                                                                                                                                                                                                                                                                                                                                                                                                                                                                                                                                                                                                                                                                                                                                                                                                                                                                                                                              |   |                |                                                                                                        |   |                |                                                                   |   |                |                                                                                                                                         |   |                |                                                                               |   |                |                                                             |   |                |                                                                |   |                |                                        |   |                |                                                |   |                |                        |   |                |                           |    |                 |                                   |    |                 |                                            |    |                 |                                                             |    |                 |                                        |    |                 |                   |
| 2  | pa_themequo__2                                                                           | Consequences on conjugal life                                                                                                           |                                                                                                                                                                                                                                                                                                                                                                                                                                                                                                                                                                                                                                                                                                                                                                                                                                                                                                                                                                                                                                                                                                                                                                                                                                                                                                                                                                                                              |   |                |                                                                                                        |   |                |                                                                   |   |                |                                                                                                                                         |   |                |                                                                               |   |                |                                                             |   |                |                                                                |   |                |                                        |   |                |                                                |   |                |                        |   |                |                           |    |                 |                                   |    |                 |                                            |    |                 |                                                             |    |                 |                                        |    |                 |                   |
| 3  | pa_themequo__3                                                                           | Consequences on sexual life                                                                                                             |                                                                                                                                                                                                                                                                                                                                                                                                                                                                                                                                                                                                                                                                                                                                                                                                                                                                                                                                                                                                                                                                                                                                                                                                                                                                                                                                                                                                              |   |                |                                                                                                        |   |                |                                                                   |   |                |                                                                                                                                         |   |                |                                                                               |   |                |                                                             |   |                |                                                                |   |                |                                        |   |                |                                                |   |                |                        |   |                |                           |    |                 |                                   |    |                 |                                            |    |                 |                                                             |    |                 |                                        |    |                 |                   |
| 4  | pa_themequo__4                                                                           | Returning to work                                                                                                                       |                                                                                                                                                                                                                                                                                                                                                                                                                                                                                                                                                                                                                                                                                                                                                                                                                                                                                                                                                                                                                                                                                                                                                                                                                                                                                                                                                                                                              |   |                |                                                                                                        |   |                |                                                                   |   |                |                                                                                                                                         |   |                |                                                                               |   |                |                                                             |   |                |                                                                |   |                |                                        |   |                |                                                |   |                |                        |   |                |                           |    |                 |                                   |    |                 |                                            |    |                 |                                                             |    |                 |                                        |    |                 |                   |
| 5  | pa_themequo__5                                                                           | The return to daily life                                                                                                                |                                                                                                                                                                                                                                                                                                                                                                                                                                                                                                                                                                                                                                                                                                                                                                                                                                                                                                                                                                                                                                                                                                                                                                                                                                                                                                                                                                                                              |   |                |                                                                                                        |   |                |                                                                   |   |                |                                                                                                                                         |   |                |                                                                               |   |                |                                                             |   |                |                                                                |   |                |                                        |   |                |                                                |   |                |                        |   |                |                           |    |                 |                                   |    |                 |                                            |    |                 |                                                             |    |                 |                                        |    |                 |                   |
| 6  | pa_themequo__6                                                                           | The consequences on the spiritual life                                                                                                  |                                                                                                                                                                                                                                                                                                                                                                                                                                                                                                                                                                                                                                                                                                                                                                                                                                                                                                                                                                                                                                                                                                                                                                                                                                                                                                                                                                                                              |   |                |                                                                                                        |   |                |                                                                   |   |                |                                                                                                                                         |   |                |                                                                               |   |                |                                                             |   |                |                                                                |   |                |                                        |   |                |                                                |   |                |                        |   |                |                           |    |                 |                                   |    |                 |                                            |    |                 |                                                             |    |                 |                                        |    |                 |                   |
| 7  | pa_themequo__7                                                                           | How to announce a diagnosis to your loved ones                                                                                          |                                                                                                                                                                                                                                                                                                                                                                                                                                                                                                                                                                                                                                                                                                                                                                                                                                                                                                                                                                                                                                                                                                                                                                                                                                                                                                                                                                                                              |   |                |                                                                                                        |   |                |                                                                   |   |                |                                                                                                                                         |   |                |                                                                               |   |                |                                                             |   |                |                                                                |   |                |                                        |   |                |                                                |   |                |                        |   |                |                           |    |                 |                                   |    |                 |                                            |    |                 |                                                             |    |                 |                                        |    |                 |                   |
| 8  | pa_themequo__8                                                                           | Financial implications                                                                                                                  |                                                                                                                                                                                                                                                                                                                                                                                                                                                                                                                                                                                                                                                                                                                                                                                                                                                                                                                                                                                                                                                                                                                                                                                                                                                                                                                                                                                                              |   |                |                                                                                                        |   |                |                                                                   |   |                |                                                                                                                                         |   |                |                                                                               |   |                |                                                             |   |                |                                                                |   |                |                                        |   |                |                                                |   |                |                        |   |                |                           |    |                 |                                   |    |                 |                                            |    |                 |                                                             |    |                 |                                        |    |                 |                   |
| 9  | pa_themequo__9                                                                           | Consequences on insurance                                                                                                               |                                                                                                                                                                                                                                                                                                                                                                                                                                                                                                                                                                                                                                                                                                                                                                                                                                                                                                                                                                                                                                                                                                                                                                                                                                                                                                                                                                                                              |   |                |                                                                                                        |   |                |                                                                   |   |                |                                                                                                                                         |   |                |                                                                               |   |                |                                                             |   |                |                                                                |   |                |                                        |   |                |                                                |   |                |                        |   |                |                           |    |                 |                                   |    |                 |                                            |    |                 |                                                             |    |                 |                                        |    |                 |                   |
| 10 | pa_themequo__10                                                                          | Consequences on professional life                                                                                                       |                                                                                                                                                                                                                                                                                                                                                                                                                                                                                                                                                                                                                                                                                                                                                                                                                                                                                                                                                                                                                                                                                                                                                                                                                                                                                                                                                                                                              |   |                |                                                                                                        |   |                |                                                                   |   |                |                                                                                                                                         |   |                |                                                                               |   |                |                                                             |   |                |                                                                |   |                |                                        |   |                |                                                |   |                |                        |   |                |                           |    |                 |                                   |    |                 |                                            |    |                 |                                                             |    |                 |                                        |    |                 |                   |
| 11 | pa_themequo__11                                                                          | Social perception (the reaction of others)                                                                                              |                                                                                                                                                                                                                                                                                                                                                                                                                                                                                                                                                                                                                                                                                                                                                                                                                                                                                                                                                                                                                                                                                                                                                                                                                                                                                                                                                                                                              |   |                |                                                                                                        |   |                |                                                                   |   |                |                                                                                                                                         |   |                |                                                                               |   |                |                                                             |   |                |                                                                |   |                |                                        |   |                |                                                |   |                |                        |   |                |                           |    |                 |                                   |    |                 |                                            |    |                 |                                                             |    |                 |                                        |    |                 |                   |
| 12 | pa_themequo__12                                                                          | Strategies for living the treatments in the best conditions                                                                             |                                                                                                                                                                                                                                                                                                                                                                                                                                                                                                                                                                                                                                                                                                                                                                                                                                                                                                                                                                                                                                                                                                                                                                                                                                                                                                                                                                                                              |   |                |                                                                                                        |   |                |                                                                   |   |                |                                                                                                                                         |   |                |                                                                               |   |                |                                                             |   |                |                                                                |   |                |                                        |   |                |                                                |   |                |                        |   |                |                           |    |                 |                                   |    |                 |                                            |    |                 |                                                             |    |                 |                                        |    |                 |                   |
| 13 | pa_themequo__13                                                                          | How to regain control over the disease                                                                                                  |                                                                                                                                                                                                                                                                                                                                                                                                                                                                                                                                                                                                                                                                                                                                                                                                                                                                                                                                                                                                                                                                                                                                                                                                                                                                                                                                                                                                              |   |                |                                                                                                        |   |                |                                                                   |   |                |                                                                                                                                         |   |                |                                                                               |   |                |                                                             |   |                |                                                                |   |                |                                        |   |                |                                                |   |                |                        |   |                |                           |    |                 |                                   |    |                 |                                            |    |                 |                                                             |    |                 |                                        |    |                 |                   |
| 14 | pa_themequo__14                                                                          | Other information                                                                                                                       |                                                                                                                                                                                                                                                                                                                                                                                                                                                                                                                                                                                                                                                                                                                                                                                                                                                                                                                                                                                                                                                                                                                                                                                                                                                                                                                                                                                                              |   |                |                                                                                                        |   |                |                                                                   |   |                |                                                                                                                                         |   |                |                                                                               |   |                |                                                             |   |                |                                                                |   |                |                                        |   |                |                                                |   |                |                        |   |                |                           |    |                 |                                   |    |                 |                                            |    |                 |                                                             |    |                 |                                        |    |                 |                   |
| 76 | pa_asp_viequot_autre<br>Afficher le champ UNIQUEM<br>ENT si :<br>[pa_themequo(14)] = '1' | If other information, please specify which one:                                                                                         | text<br>Alignement personnalisé : LV                                                                                                                                                                                                                                                                                                                                                                                                                                                                                                                                                                                                                                                                                                                                                                                                                                                                                                                                                                                                                                                                                                                                                                                                                                                                                                                                                                         |   |                |                                                                                                        |   |                |                                                                   |   |                |                                                                                                                                         |   |                |                                                                               |   |                |                                                             |   |                |                                                                |   |                |                                        |   |                |                                                |   |                |                        |   |                |                           |    |                 |                                   |    |                 |                                            |    |                 |                                                             |    |                 |                                        |    |                 |                   |
| 77 | pa_bene<br>Afficher le champ UNIQUEM<br>ENT si :<br>[pa_jumelage] = '0'                  | In what area has the accompaniment been beneficial? (You may check more than one answer.)                                               | checkbox <table border="1" data-bbox="1023 1256 1493 1868"> <tr><td>0</td><td>pa_bene__0</td><td>My understanding of my care pathway within the health care institution (steps, role of each person...)</td></tr> <tr><td>1</td><td>pa_bene__1</td><td>My relationships and exchanges with the medical and nursing teams</td></tr> <tr><td>2</td><td>pa_bene__2</td><td>My experience of the disease (sharing experiences on side effects, on the impact of the disease on daily life, with those around me...)</td></tr> <tr><td>3</td><td>pa_bene__3</td><td>My quality of life (decrease in stress level, anxiety, feeling understood...)</td></tr> <tr><td>4</td><td>pa_bene__4</td><td>My knowledge of services and associations that can help me.</td></tr> <tr><td>5</td><td>pa_bene__5</td><td>This accompaniment has not been particularly beneficial to me.</td></tr> <tr><td>6</td><td>pa_bene__6</td><td>Other</td></tr> </table><br>Alignement personnalisé : LV                                                                                                                                                                                                                                                                                                                                                                                                                                | 0 | pa_bene__0     | My understanding of my care pathway within the health care institution (steps, role of each person...) | 1 | pa_bene__1     | My relationships and exchanges with the medical and nursing teams | 2 | pa_bene__2     | My experience of the disease (sharing experiences on side effects, on the impact of the disease on daily life, with those around me...) | 3 | pa_bene__3     | My quality of life (decrease in stress level, anxiety, feeling understood...) | 4 | pa_bene__4     | My knowledge of services and associations that can help me. | 5 | pa_bene__5     | This accompaniment has not been particularly beneficial to me. | 6 | pa_bene__6     | Other                                  |   |                |                                                |   |                |                        |   |                |                           |    |                 |                                   |    |                 |                                            |    |                 |                                                             |    |                 |                                        |    |                 |                   |
| 0  | pa_bene__0                                                                               | My understanding of my care pathway within the health care institution (steps, role of each person...)                                  |                                                                                                                                                                                                                                                                                                                                                                                                                                                                                                                                                                                                                                                                                                                                                                                                                                                                                                                                                                                                                                                                                                                                                                                                                                                                                                                                                                                                              |   |                |                                                                                                        |   |                |                                                                   |   |                |                                                                                                                                         |   |                |                                                                               |   |                |                                                             |   |                |                                                                |   |                |                                        |   |                |                                                |   |                |                        |   |                |                           |    |                 |                                   |    |                 |                                            |    |                 |                                                             |    |                 |                                        |    |                 |                   |
| 1  | pa_bene__1                                                                               | My relationships and exchanges with the medical and nursing teams                                                                       |                                                                                                                                                                                                                                                                                                                                                                                                                                                                                                                                                                                                                                                                                                                                                                                                                                                                                                                                                                                                                                                                                                                                                                                                                                                                                                                                                                                                              |   |                |                                                                                                        |   |                |                                                                   |   |                |                                                                                                                                         |   |                |                                                                               |   |                |                                                             |   |                |                                                                |   |                |                                        |   |                |                                                |   |                |                        |   |                |                           |    |                 |                                   |    |                 |                                            |    |                 |                                                             |    |                 |                                        |    |                 |                   |
| 2  | pa_bene__2                                                                               | My experience of the disease (sharing experiences on side effects, on the impact of the disease on daily life, with those around me...) |                                                                                                                                                                                                                                                                                                                                                                                                                                                                                                                                                                                                                                                                                                                                                                                                                                                                                                                                                                                                                                                                                                                                                                                                                                                                                                                                                                                                              |   |                |                                                                                                        |   |                |                                                                   |   |                |                                                                                                                                         |   |                |                                                                               |   |                |                                                             |   |                |                                                                |   |                |                                        |   |                |                                                |   |                |                        |   |                |                           |    |                 |                                   |    |                 |                                            |    |                 |                                                             |    |                 |                                        |    |                 |                   |
| 3  | pa_bene__3                                                                               | My quality of life (decrease in stress level, anxiety, feeling understood...)                                                           |                                                                                                                                                                                                                                                                                                                                                                                                                                                                                                                                                                                                                                                                                                                                                                                                                                                                                                                                                                                                                                                                                                                                                                                                                                                                                                                                                                                                              |   |                |                                                                                                        |   |                |                                                                   |   |                |                                                                                                                                         |   |                |                                                                               |   |                |                                                             |   |                |                                                                |   |                |                                        |   |                |                                                |   |                |                        |   |                |                           |    |                 |                                   |    |                 |                                            |    |                 |                                                             |    |                 |                                        |    |                 |                   |
| 4  | pa_bene__4                                                                               | My knowledge of services and associations that can help me.                                                                             |                                                                                                                                                                                                                                                                                                                                                                                                                                                                                                                                                                                                                                                                                                                                                                                                                                                                                                                                                                                                                                                                                                                                                                                                                                                                                                                                                                                                              |   |                |                                                                                                        |   |                |                                                                   |   |                |                                                                                                                                         |   |                |                                                                               |   |                |                                                             |   |                |                                                                |   |                |                                        |   |                |                                                |   |                |                        |   |                |                           |    |                 |                                   |    |                 |                                            |    |                 |                                                             |    |                 |                                        |    |                 |                   |
| 5  | pa_bene__5                                                                               | This accompaniment has not been particularly beneficial to me.                                                                          |                                                                                                                                                                                                                                                                                                                                                                                                                                                                                                                                                                                                                                                                                                                                                                                                                                                                                                                                                                                                                                                                                                                                                                                                                                                                                                                                                                                                              |   |                |                                                                                                        |   |                |                                                                   |   |                |                                                                                                                                         |   |                |                                                                               |   |                |                                                             |   |                |                                                                |   |                |                                        |   |                |                                                |   |                |                        |   |                |                           |    |                 |                                   |    |                 |                                            |    |                 |                                                             |    |                 |                                        |    |                 |                   |
| 6  | pa_bene__6                                                                               | Other                                                                                                                                   |                                                                                                                                                                                                                                                                                                                                                                                                                                                                                                                                                                                                                                                                                                                                                                                                                                                                                                                                                                                                                                                                                                                                                                                                                                                                                                                                                                                                              |   |                |                                                                                                        |   |                |                                                                   |   |                |                                                                                                                                         |   |                |                                                                               |   |                |                                                             |   |                |                                                                |   |                |                                        |   |                |                                                |   |                |                        |   |                |                           |    |                 |                                   |    |                 |                                            |    |                 |                                                             |    |                 |                                        |    |                 |                   |
| 78 | pa_bene_autre<br>Afficher le champ UNIQUEM<br>ENT si :<br>[pa_bene(6)] = '1'             | If other benefit, please specify which one:                                                                                             | text<br>Alignement personnalisé : LV                                                                                                                                                                                                                                                                                                                                                                                                                                                                                                                                                                                                                                                                                                                                                                                                                                                                                                                                                                                                                                                                                                                                                                                                                                                                                                                                                                         |   |                |                                                                                                        |   |                |                                                                   |   |                |                                                                                                                                         |   |                |                                                                               |   |                |                                                             |   |                |                                                                |   |                |                                        |   |                |                                                |   |                |                        |   |                |                           |    |                 |                                   |    |                 |                                            |    |                 |                                                             |    |                 |                                        |    |                 |                   |

|    |                                                                                                               |                                                                                                                       |                                                                                                                                                                                                                                                                                                                                                                                                                                                                                                                                                                                                                                                                                                                                                                                                                                                                                                                                                                                                                                                                                                                                                                                                                                                                                                                                                                                                                                                                                                                                                                                                                                                                                                                                                                                                                                                                  |   |                   |                    |          |              |                            |   |              |                     |                |              |                                                                                          |   |              |                                                                    |   |              |                                                                                    |   |              |                                 |   |              |                                                |   |              |                                               |    |               |                                                    |    |               |                                               |    |               |                                              |    |               |                                                                                   |    |               |                                                             |    |               |                          |    |               |                    |    |               |                                                                                        |
|----|---------------------------------------------------------------------------------------------------------------|-----------------------------------------------------------------------------------------------------------------------|------------------------------------------------------------------------------------------------------------------------------------------------------------------------------------------------------------------------------------------------------------------------------------------------------------------------------------------------------------------------------------------------------------------------------------------------------------------------------------------------------------------------------------------------------------------------------------------------------------------------------------------------------------------------------------------------------------------------------------------------------------------------------------------------------------------------------------------------------------------------------------------------------------------------------------------------------------------------------------------------------------------------------------------------------------------------------------------------------------------------------------------------------------------------------------------------------------------------------------------------------------------------------------------------------------------------------------------------------------------------------------------------------------------------------------------------------------------------------------------------------------------------------------------------------------------------------------------------------------------------------------------------------------------------------------------------------------------------------------------------------------------------------------------------------------------------------------------------------------------|---|-------------------|--------------------|----------|--------------|----------------------------|---|--------------|---------------------|----------------|--------------|------------------------------------------------------------------------------------------|---|--------------|--------------------------------------------------------------------|---|--------------|------------------------------------------------------------------------------------|---|--------------|---------------------------------|---|--------------|------------------------------------------------|---|--------------|-----------------------------------------------|----|---------------|----------------------------------------------------|----|---------------|-----------------------------------------------|----|---------------|----------------------------------------------|----|---------------|-----------------------------------------------------------------------------------|----|---------------|-------------------------------------------------------------|----|---------------|--------------------------|----|---------------|--------------------|----|---------------|----------------------------------------------------------------------------------------|
| 79 | <p>pa_contri</p> <p>Afficher le champ UNIQUEM ENT si : [pa_jumelage] = '0'</p>                                | <p>In your opinion, what is the contribution of the patient advisor? You may check more than one answer.</p>          | <p>checkbox</p> <table border="1" data-bbox="1023 109 1495 1265"> <tr><td>1</td><td>pa_contri__1</td><td>Giving information</td></tr> <tr><td>2</td><td>pa_contri__2</td><td>Giving support</td></tr> <tr><td>3</td><td>pa_contri__3</td><td>Sharing experiences</td></tr> <tr><td>4</td><td>pa_contri__4</td><td>Facilitate communication between the health care team and the patient being accompanied.</td></tr> <tr><td>5</td><td>pa_contri__5</td><td>Helping to bring the patient's perspective to the health care team</td></tr> <tr><td>6</td><td>pa_contri__6</td><td>Improving understanding of information shared between patient and health care team</td></tr> <tr><td>7</td><td>pa_contri__7</td><td>Helping to remember information</td></tr> <tr><td>8</td><td>pa_contri__8</td><td>Preparing the patient for medical appointments</td></tr> <tr><td>9</td><td>pa_contri__9</td><td>Accompanying patients to medical appointments</td></tr> <tr><td>10</td><td>pa_contri__10</td><td>Helping the patient participate in decision making</td></tr> <tr><td>11</td><td>pa_contri__11</td><td>Bringing a new perspective to decision making</td></tr> <tr><td>12</td><td>pa_contri__12</td><td>Referring patients to a variety of resources</td></tr> <tr><td>13</td><td>pa_contri__13</td><td>Help develop a trusting relationship between the patient and the health care team</td></tr> <tr><td>14</td><td>pa_contri__14</td><td>Helping the patient become a partner in his or her own care</td></tr> <tr><td>15</td><td>pa_contri__15</td><td>Listening to the patient</td></tr> <tr><td>16</td><td>pa_contri__16</td><td>Other contribution</td></tr> <tr><td>17</td><td>pa_contri__17</td><td>No, the patient advisor has no particular contribution to make to the care trajectory.</td></tr> </table> <p>Alignement personnalisé : LV</p> | 1 | pa_contri__1      | Giving information | 2        | pa_contri__2 | Giving support             | 3 | pa_contri__3 | Sharing experiences | 4              | pa_contri__4 | Facilitate communication between the health care team and the patient being accompanied. | 5 | pa_contri__5 | Helping to bring the patient's perspective to the health care team | 6 | pa_contri__6 | Improving understanding of information shared between patient and health care team | 7 | pa_contri__7 | Helping to remember information | 8 | pa_contri__8 | Preparing the patient for medical appointments | 9 | pa_contri__9 | Accompanying patients to medical appointments | 10 | pa_contri__10 | Helping the patient participate in decision making | 11 | pa_contri__11 | Bringing a new perspective to decision making | 12 | pa_contri__12 | Referring patients to a variety of resources | 13 | pa_contri__13 | Help develop a trusting relationship between the patient and the health care team | 14 | pa_contri__14 | Helping the patient become a partner in his or her own care | 15 | pa_contri__15 | Listening to the patient | 16 | pa_contri__16 | Other contribution | 17 | pa_contri__17 | No, the patient advisor has no particular contribution to make to the care trajectory. |
| 1  | pa_contri__1                                                                                                  | Giving information                                                                                                    |                                                                                                                                                                                                                                                                                                                                                                                                                                                                                                                                                                                                                                                                                                                                                                                                                                                                                                                                                                                                                                                                                                                                                                                                                                                                                                                                                                                                                                                                                                                                                                                                                                                                                                                                                                                                                                                                  |   |                   |                    |          |              |                            |   |              |                     |                |              |                                                                                          |   |              |                                                                    |   |              |                                                                                    |   |              |                                 |   |              |                                                |   |              |                                               |    |               |                                                    |    |               |                                               |    |               |                                              |    |               |                                                                                   |    |               |                                                             |    |               |                          |    |               |                    |    |               |                                                                                        |
| 2  | pa_contri__2                                                                                                  | Giving support                                                                                                        |                                                                                                                                                                                                                                                                                                                                                                                                                                                                                                                                                                                                                                                                                                                                                                                                                                                                                                                                                                                                                                                                                                                                                                                                                                                                                                                                                                                                                                                                                                                                                                                                                                                                                                                                                                                                                                                                  |   |                   |                    |          |              |                            |   |              |                     |                |              |                                                                                          |   |              |                                                                    |   |              |                                                                                    |   |              |                                 |   |              |                                                |   |              |                                               |    |               |                                                    |    |               |                                               |    |               |                                              |    |               |                                                                                   |    |               |                                                             |    |               |                          |    |               |                    |    |               |                                                                                        |
| 3  | pa_contri__3                                                                                                  | Sharing experiences                                                                                                   |                                                                                                                                                                                                                                                                                                                                                                                                                                                                                                                                                                                                                                                                                                                                                                                                                                                                                                                                                                                                                                                                                                                                                                                                                                                                                                                                                                                                                                                                                                                                                                                                                                                                                                                                                                                                                                                                  |   |                   |                    |          |              |                            |   |              |                     |                |              |                                                                                          |   |              |                                                                    |   |              |                                                                                    |   |              |                                 |   |              |                                                |   |              |                                               |    |               |                                                    |    |               |                                               |    |               |                                              |    |               |                                                                                   |    |               |                                                             |    |               |                          |    |               |                    |    |               |                                                                                        |
| 4  | pa_contri__4                                                                                                  | Facilitate communication between the health care team and the patient being accompanied.                              |                                                                                                                                                                                                                                                                                                                                                                                                                                                                                                                                                                                                                                                                                                                                                                                                                                                                                                                                                                                                                                                                                                                                                                                                                                                                                                                                                                                                                                                                                                                                                                                                                                                                                                                                                                                                                                                                  |   |                   |                    |          |              |                            |   |              |                     |                |              |                                                                                          |   |              |                                                                    |   |              |                                                                                    |   |              |                                 |   |              |                                                |   |              |                                               |    |               |                                                    |    |               |                                               |    |               |                                              |    |               |                                                                                   |    |               |                                                             |    |               |                          |    |               |                    |    |               |                                                                                        |
| 5  | pa_contri__5                                                                                                  | Helping to bring the patient's perspective to the health care team                                                    |                                                                                                                                                                                                                                                                                                                                                                                                                                                                                                                                                                                                                                                                                                                                                                                                                                                                                                                                                                                                                                                                                                                                                                                                                                                                                                                                                                                                                                                                                                                                                                                                                                                                                                                                                                                                                                                                  |   |                   |                    |          |              |                            |   |              |                     |                |              |                                                                                          |   |              |                                                                    |   |              |                                                                                    |   |              |                                 |   |              |                                                |   |              |                                               |    |               |                                                    |    |               |                                               |    |               |                                              |    |               |                                                                                   |    |               |                                                             |    |               |                          |    |               |                    |    |               |                                                                                        |
| 6  | pa_contri__6                                                                                                  | Improving understanding of information shared between patient and health care team                                    |                                                                                                                                                                                                                                                                                                                                                                                                                                                                                                                                                                                                                                                                                                                                                                                                                                                                                                                                                                                                                                                                                                                                                                                                                                                                                                                                                                                                                                                                                                                                                                                                                                                                                                                                                                                                                                                                  |   |                   |                    |          |              |                            |   |              |                     |                |              |                                                                                          |   |              |                                                                    |   |              |                                                                                    |   |              |                                 |   |              |                                                |   |              |                                               |    |               |                                                    |    |               |                                               |    |               |                                              |    |               |                                                                                   |    |               |                                                             |    |               |                          |    |               |                    |    |               |                                                                                        |
| 7  | pa_contri__7                                                                                                  | Helping to remember information                                                                                       |                                                                                                                                                                                                                                                                                                                                                                                                                                                                                                                                                                                                                                                                                                                                                                                                                                                                                                                                                                                                                                                                                                                                                                                                                                                                                                                                                                                                                                                                                                                                                                                                                                                                                                                                                                                                                                                                  |   |                   |                    |          |              |                            |   |              |                     |                |              |                                                                                          |   |              |                                                                    |   |              |                                                                                    |   |              |                                 |   |              |                                                |   |              |                                               |    |               |                                                    |    |               |                                               |    |               |                                              |    |               |                                                                                   |    |               |                                                             |    |               |                          |    |               |                    |    |               |                                                                                        |
| 8  | pa_contri__8                                                                                                  | Preparing the patient for medical appointments                                                                        |                                                                                                                                                                                                                                                                                                                                                                                                                                                                                                                                                                                                                                                                                                                                                                                                                                                                                                                                                                                                                                                                                                                                                                                                                                                                                                                                                                                                                                                                                                                                                                                                                                                                                                                                                                                                                                                                  |   |                   |                    |          |              |                            |   |              |                     |                |              |                                                                                          |   |              |                                                                    |   |              |                                                                                    |   |              |                                 |   |              |                                                |   |              |                                               |    |               |                                                    |    |               |                                               |    |               |                                              |    |               |                                                                                   |    |               |                                                             |    |               |                          |    |               |                    |    |               |                                                                                        |
| 9  | pa_contri__9                                                                                                  | Accompanying patients to medical appointments                                                                         |                                                                                                                                                                                                                                                                                                                                                                                                                                                                                                                                                                                                                                                                                                                                                                                                                                                                                                                                                                                                                                                                                                                                                                                                                                                                                                                                                                                                                                                                                                                                                                                                                                                                                                                                                                                                                                                                  |   |                   |                    |          |              |                            |   |              |                     |                |              |                                                                                          |   |              |                                                                    |   |              |                                                                                    |   |              |                                 |   |              |                                                |   |              |                                               |    |               |                                                    |    |               |                                               |    |               |                                              |    |               |                                                                                   |    |               |                                                             |    |               |                          |    |               |                    |    |               |                                                                                        |
| 10 | pa_contri__10                                                                                                 | Helping the patient participate in decision making                                                                    |                                                                                                                                                                                                                                                                                                                                                                                                                                                                                                                                                                                                                                                                                                                                                                                                                                                                                                                                                                                                                                                                                                                                                                                                                                                                                                                                                                                                                                                                                                                                                                                                                                                                                                                                                                                                                                                                  |   |                   |                    |          |              |                            |   |              |                     |                |              |                                                                                          |   |              |                                                                    |   |              |                                                                                    |   |              |                                 |   |              |                                                |   |              |                                               |    |               |                                                    |    |               |                                               |    |               |                                              |    |               |                                                                                   |    |               |                                                             |    |               |                          |    |               |                    |    |               |                                                                                        |
| 11 | pa_contri__11                                                                                                 | Bringing a new perspective to decision making                                                                         |                                                                                                                                                                                                                                                                                                                                                                                                                                                                                                                                                                                                                                                                                                                                                                                                                                                                                                                                                                                                                                                                                                                                                                                                                                                                                                                                                                                                                                                                                                                                                                                                                                                                                                                                                                                                                                                                  |   |                   |                    |          |              |                            |   |              |                     |                |              |                                                                                          |   |              |                                                                    |   |              |                                                                                    |   |              |                                 |   |              |                                                |   |              |                                               |    |               |                                                    |    |               |                                               |    |               |                                              |    |               |                                                                                   |    |               |                                                             |    |               |                          |    |               |                    |    |               |                                                                                        |
| 12 | pa_contri__12                                                                                                 | Referring patients to a variety of resources                                                                          |                                                                                                                                                                                                                                                                                                                                                                                                                                                                                                                                                                                                                                                                                                                                                                                                                                                                                                                                                                                                                                                                                                                                                                                                                                                                                                                                                                                                                                                                                                                                                                                                                                                                                                                                                                                                                                                                  |   |                   |                    |          |              |                            |   |              |                     |                |              |                                                                                          |   |              |                                                                    |   |              |                                                                                    |   |              |                                 |   |              |                                                |   |              |                                               |    |               |                                                    |    |               |                                               |    |               |                                              |    |               |                                                                                   |    |               |                                                             |    |               |                          |    |               |                    |    |               |                                                                                        |
| 13 | pa_contri__13                                                                                                 | Help develop a trusting relationship between the patient and the health care team                                     |                                                                                                                                                                                                                                                                                                                                                                                                                                                                                                                                                                                                                                                                                                                                                                                                                                                                                                                                                                                                                                                                                                                                                                                                                                                                                                                                                                                                                                                                                                                                                                                                                                                                                                                                                                                                                                                                  |   |                   |                    |          |              |                            |   |              |                     |                |              |                                                                                          |   |              |                                                                    |   |              |                                                                                    |   |              |                                 |   |              |                                                |   |              |                                               |    |               |                                                    |    |               |                                               |    |               |                                              |    |               |                                                                                   |    |               |                                                             |    |               |                          |    |               |                    |    |               |                                                                                        |
| 14 | pa_contri__14                                                                                                 | Helping the patient become a partner in his or her own care                                                           |                                                                                                                                                                                                                                                                                                                                                                                                                                                                                                                                                                                                                                                                                                                                                                                                                                                                                                                                                                                                                                                                                                                                                                                                                                                                                                                                                                                                                                                                                                                                                                                                                                                                                                                                                                                                                                                                  |   |                   |                    |          |              |                            |   |              |                     |                |              |                                                                                          |   |              |                                                                    |   |              |                                                                                    |   |              |                                 |   |              |                                                |   |              |                                               |    |               |                                                    |    |               |                                               |    |               |                                              |    |               |                                                                                   |    |               |                                                             |    |               |                          |    |               |                    |    |               |                                                                                        |
| 15 | pa_contri__15                                                                                                 | Listening to the patient                                                                                              |                                                                                                                                                                                                                                                                                                                                                                                                                                                                                                                                                                                                                                                                                                                                                                                                                                                                                                                                                                                                                                                                                                                                                                                                                                                                                                                                                                                                                                                                                                                                                                                                                                                                                                                                                                                                                                                                  |   |                   |                    |          |              |                            |   |              |                     |                |              |                                                                                          |   |              |                                                                    |   |              |                                                                                    |   |              |                                 |   |              |                                                |   |              |                                               |    |               |                                                    |    |               |                                               |    |               |                                              |    |               |                                                                                   |    |               |                                                             |    |               |                          |    |               |                    |    |               |                                                                                        |
| 16 | pa_contri__16                                                                                                 | Other contribution                                                                                                    |                                                                                                                                                                                                                                                                                                                                                                                                                                                                                                                                                                                                                                                                                                                                                                                                                                                                                                                                                                                                                                                                                                                                                                                                                                                                                                                                                                                                                                                                                                                                                                                                                                                                                                                                                                                                                                                                  |   |                   |                    |          |              |                            |   |              |                     |                |              |                                                                                          |   |              |                                                                    |   |              |                                                                                    |   |              |                                 |   |              |                                                |   |              |                                               |    |               |                                                    |    |               |                                               |    |               |                                              |    |               |                                                                                   |    |               |                                                             |    |               |                          |    |               |                    |    |               |                                                                                        |
| 17 | pa_contri__17                                                                                                 | No, the patient advisor has no particular contribution to make to the care trajectory.                                |                                                                                                                                                                                                                                                                                                                                                                                                                                                                                                                                                                                                                                                                                                                                                                                                                                                                                                                                                                                                                                                                                                                                                                                                                                                                                                                                                                                                                                                                                                                                                                                                                                                                                                                                                                                                                                                                  |   |                   |                    |          |              |                            |   |              |                     |                |              |                                                                                          |   |              |                                                                    |   |              |                                                                                    |   |              |                                 |   |              |                                                |   |              |                                               |    |               |                                                    |    |               |                                               |    |               |                                              |    |               |                                                                                   |    |               |                                                             |    |               |                          |    |               |                    |    |               |                                                                                        |
| 80 | <p>pa_contriautre</p> <p>Afficher le champ UNIQUEM ENT si : [pa_jumelage] = '0' and [pa_contri(16)] = '1'</p> | <p>Please indicate what other contribution the patient advisor has had.</p>                                           | <p>text</p> <p>Alignement personnalisé : LV</p>                                                                                                                                                                                                                                                                                                                                                                                                                                                                                                                                                                                                                                                                                                                                                                                                                                                                                                                                                                                                                                                                                                                                                                                                                                                                                                                                                                                                                                                                                                                                                                                                                                                                                                                                                                                                                  |   |                   |                    |          |              |                            |   |              |                     |                |              |                                                                                          |   |              |                                                                    |   |              |                                                                                    |   |              |                                 |   |              |                                                |   |              |                                               |    |               |                                                    |    |               |                                               |    |               |                                              |    |               |                                                                                   |    |               |                                                             |    |               |                          |    |               |                    |    |               |                                                                                        |
| 81 | <p>pa_postacc_mat</p> <p>Afficher le champ UNIQUEM ENT si : [pa_jumelage] = '0'</p>                           | <p>To what extent do you agree with each of the following statements?</p>                                             | <p>descriptive</p>                                                                                                                                                                                                                                                                                                                                                                                                                                                                                                                                                                                                                                                                                                                                                                                                                                                                                                                                                                                                                                                                                                                                                                                                                                                                                                                                                                                                                                                                                                                                                                                                                                                                                                                                                                                                                                               |   |                   |                    |          |              |                            |   |              |                     |                |              |                                                                                          |   |              |                                                                    |   |              |                                                                                    |   |              |                                 |   |              |                                                |   |              |                                               |    |               |                                                    |    |               |                                               |    |               |                                              |    |               |                                                                                   |    |               |                                                             |    |               |                          |    |               |                    |    |               |                                                                                        |
| 82 | <p>mat_post_bes</p> <p>Afficher le champ UNIQUEM ENT si : [pa_jumelage] = '0'</p>                             | <p>This/these meeting(s) with a patient advisor has/have met my needs:</p>                                            | <p>radio (Matrice)</p> <table border="1" data-bbox="1023 1644 1305 1879"> <tr><td>1</td><td>Strongly Disagree</td></tr> <tr><td>2</td><td>Disagree</td></tr> <tr><td>3</td><td>Neither agree nor disagree</td></tr> <tr><td>4</td><td>Agree</td></tr> <tr><td>5</td><td>Strongly agree</td></tr> <tr><td>6</td><td>I don't know</td></tr> </table>                                                                                                                                                                                                                                                                                                                                                                                                                                                                                                                                                                                                                                                                                                                                                                                                                                                                                                                                                                                                                                                                                                                                                                                                                                                                                                                                                                                                                                                                                                               | 1 | Strongly Disagree | 2                  | Disagree | 3            | Neither agree nor disagree | 4 | Agree        | 5                   | Strongly agree | 6            | I don't know                                                                             |   |              |                                                                    |   |              |                                                                                    |   |              |                                 |   |              |                                                |   |              |                                               |    |               |                                                    |    |               |                                               |    |               |                                              |    |               |                                                                                   |    |               |                                                             |    |               |                          |    |               |                    |    |               |                                                                                        |
| 1  | Strongly Disagree                                                                                             |                                                                                                                       |                                                                                                                                                                                                                                                                                                                                                                                                                                                                                                                                                                                                                                                                                                                                                                                                                                                                                                                                                                                                                                                                                                                                                                                                                                                                                                                                                                                                                                                                                                                                                                                                                                                                                                                                                                                                                                                                  |   |                   |                    |          |              |                            |   |              |                     |                |              |                                                                                          |   |              |                                                                    |   |              |                                                                                    |   |              |                                 |   |              |                                                |   |              |                                               |    |               |                                                    |    |               |                                               |    |               |                                              |    |               |                                                                                   |    |               |                                                             |    |               |                          |    |               |                    |    |               |                                                                                        |
| 2  | Disagree                                                                                                      |                                                                                                                       |                                                                                                                                                                                                                                                                                                                                                                                                                                                                                                                                                                                                                                                                                                                                                                                                                                                                                                                                                                                                                                                                                                                                                                                                                                                                                                                                                                                                                                                                                                                                                                                                                                                                                                                                                                                                                                                                  |   |                   |                    |          |              |                            |   |              |                     |                |              |                                                                                          |   |              |                                                                    |   |              |                                                                                    |   |              |                                 |   |              |                                                |   |              |                                               |    |               |                                                    |    |               |                                               |    |               |                                              |    |               |                                                                                   |    |               |                                                             |    |               |                          |    |               |                    |    |               |                                                                                        |
| 3  | Neither agree nor disagree                                                                                    |                                                                                                                       |                                                                                                                                                                                                                                                                                                                                                                                                                                                                                                                                                                                                                                                                                                                                                                                                                                                                                                                                                                                                                                                                                                                                                                                                                                                                                                                                                                                                                                                                                                                                                                                                                                                                                                                                                                                                                                                                  |   |                   |                    |          |              |                            |   |              |                     |                |              |                                                                                          |   |              |                                                                    |   |              |                                                                                    |   |              |                                 |   |              |                                                |   |              |                                               |    |               |                                                    |    |               |                                               |    |               |                                              |    |               |                                                                                   |    |               |                                                             |    |               |                          |    |               |                    |    |               |                                                                                        |
| 4  | Agree                                                                                                         |                                                                                                                       |                                                                                                                                                                                                                                                                                                                                                                                                                                                                                                                                                                                                                                                                                                                                                                                                                                                                                                                                                                                                                                                                                                                                                                                                                                                                                                                                                                                                                                                                                                                                                                                                                                                                                                                                                                                                                                                                  |   |                   |                    |          |              |                            |   |              |                     |                |              |                                                                                          |   |              |                                                                    |   |              |                                                                                    |   |              |                                 |   |              |                                                |   |              |                                               |    |               |                                                    |    |               |                                               |    |               |                                              |    |               |                                                                                   |    |               |                                                             |    |               |                          |    |               |                    |    |               |                                                                                        |
| 5  | Strongly agree                                                                                                |                                                                                                                       |                                                                                                                                                                                                                                                                                                                                                                                                                                                                                                                                                                                                                                                                                                                                                                                                                                                                                                                                                                                                                                                                                                                                                                                                                                                                                                                                                                                                                                                                                                                                                                                                                                                                                                                                                                                                                                                                  |   |                   |                    |          |              |                            |   |              |                     |                |              |                                                                                          |   |              |                                                                    |   |              |                                                                                    |   |              |                                 |   |              |                                                |   |              |                                               |    |               |                                                    |    |               |                                               |    |               |                                              |    |               |                                                                                   |    |               |                                                             |    |               |                          |    |               |                    |    |               |                                                                                        |
| 6  | I don't know                                                                                                  |                                                                                                                       |                                                                                                                                                                                                                                                                                                                                                                                                                                                                                                                                                                                                                                                                                                                                                                                                                                                                                                                                                                                                                                                                                                                                                                                                                                                                                                                                                                                                                                                                                                                                                                                                                                                                                                                                                                                                                                                                  |   |                   |                    |          |              |                            |   |              |                     |                |              |                                                                                          |   |              |                                                                    |   |              |                                                                                    |   |              |                                 |   |              |                                                |   |              |                                               |    |               |                                                    |    |               |                                               |    |               |                                              |    |               |                                                                                   |    |               |                                                             |    |               |                          |    |               |                    |    |               |                                                                                        |
| 83 | <p>mat_post_lib</p> <p>Afficher le champ UNIQUEM ENT si : [pa_jumelage] = '0'</p>                             | <p>I feel free to discuss all the subjects that preoccupy me during this/these meeting(s) with a patient advisor:</p> | <p>radio (Matrice)</p> <table border="1" data-bbox="1023 1919 1305 2154"> <tr><td>1</td><td>Strongly Disagree</td></tr> <tr><td>2</td><td>Disagree</td></tr> <tr><td>3</td><td>Neither agree nor disagree</td></tr> <tr><td>4</td><td>Agree</td></tr> <tr><td>5</td><td>Strongly agree</td></tr> <tr><td>6</td><td>I don't know</td></tr> </table>                                                                                                                                                                                                                                                                                                                                                                                                                                                                                                                                                                                                                                                                                                                                                                                                                                                                                                                                                                                                                                                                                                                                                                                                                                                                                                                                                                                                                                                                                                               | 1 | Strongly Disagree | 2                  | Disagree | 3            | Neither agree nor disagree | 4 | Agree        | 5                   | Strongly agree | 6            | I don't know                                                                             |   |              |                                                                    |   |              |                                                                                    |   |              |                                 |   |              |                                                |   |              |                                               |    |               |                                                    |    |               |                                               |    |               |                                              |    |               |                                                                                   |    |               |                                                             |    |               |                          |    |               |                    |    |               |                                                                                        |
| 1  | Strongly Disagree                                                                                             |                                                                                                                       |                                                                                                                                                                                                                                                                                                                                                                                                                                                                                                                                                                                                                                                                                                                                                                                                                                                                                                                                                                                                                                                                                                                                                                                                                                                                                                                                                                                                                                                                                                                                                                                                                                                                                                                                                                                                                                                                  |   |                   |                    |          |              |                            |   |              |                     |                |              |                                                                                          |   |              |                                                                    |   |              |                                                                                    |   |              |                                 |   |              |                                                |   |              |                                               |    |               |                                                    |    |               |                                               |    |               |                                              |    |               |                                                                                   |    |               |                                                             |    |               |                          |    |               |                    |    |               |                                                                                        |
| 2  | Disagree                                                                                                      |                                                                                                                       |                                                                                                                                                                                                                                                                                                                                                                                                                                                                                                                                                                                                                                                                                                                                                                                                                                                                                                                                                                                                                                                                                                                                                                                                                                                                                                                                                                                                                                                                                                                                                                                                                                                                                                                                                                                                                                                                  |   |                   |                    |          |              |                            |   |              |                     |                |              |                                                                                          |   |              |                                                                    |   |              |                                                                                    |   |              |                                 |   |              |                                                |   |              |                                               |    |               |                                                    |    |               |                                               |    |               |                                              |    |               |                                                                                   |    |               |                                                             |    |               |                          |    |               |                    |    |               |                                                                                        |
| 3  | Neither agree nor disagree                                                                                    |                                                                                                                       |                                                                                                                                                                                                                                                                                                                                                                                                                                                                                                                                                                                                                                                                                                                                                                                                                                                                                                                                                                                                                                                                                                                                                                                                                                                                                                                                                                                                                                                                                                                                                                                                                                                                                                                                                                                                                                                                  |   |                   |                    |          |              |                            |   |              |                     |                |              |                                                                                          |   |              |                                                                    |   |              |                                                                                    |   |              |                                 |   |              |                                                |   |              |                                               |    |               |                                                    |    |               |                                               |    |               |                                              |    |               |                                                                                   |    |               |                                                             |    |               |                          |    |               |                    |    |               |                                                                                        |
| 4  | Agree                                                                                                         |                                                                                                                       |                                                                                                                                                                                                                                                                                                                                                                                                                                                                                                                                                                                                                                                                                                                                                                                                                                                                                                                                                                                                                                                                                                                                                                                                                                                                                                                                                                                                                                                                                                                                                                                                                                                                                                                                                                                                                                                                  |   |                   |                    |          |              |                            |   |              |                     |                |              |                                                                                          |   |              |                                                                    |   |              |                                                                                    |   |              |                                 |   |              |                                                |   |              |                                               |    |               |                                                    |    |               |                                               |    |               |                                              |    |               |                                                                                   |    |               |                                                             |    |               |                          |    |               |                    |    |               |                                                                                        |
| 5  | Strongly agree                                                                                                |                                                                                                                       |                                                                                                                                                                                                                                                                                                                                                                                                                                                                                                                                                                                                                                                                                                                                                                                                                                                                                                                                                                                                                                                                                                                                                                                                                                                                                                                                                                                                                                                                                                                                                                                                                                                                                                                                                                                                                                                                  |   |                   |                    |          |              |                            |   |              |                     |                |              |                                                                                          |   |              |                                                                    |   |              |                                                                                    |   |              |                                 |   |              |                                                |   |              |                                               |    |               |                                                    |    |               |                                               |    |               |                                              |    |               |                                                                                   |    |               |                                                             |    |               |                          |    |               |                    |    |               |                                                                                        |
| 6  | I don't know                                                                                                  |                                                                                                                       |                                                                                                                                                                                                                                                                                                                                                                                                                                                                                                                                                                                                                                                                                                                                                                                                                                                                                                                                                                                                                                                                                                                                                                                                                                                                                                                                                                                                                                                                                                                                                                                                                                                                                                                                                                                                                                                                  |   |                   |                    |          |              |                            |   |              |                     |                |              |                                                                                          |   |              |                                                                    |   |              |                                                                                    |   |              |                                 |   |              |                                                |   |              |                                               |    |               |                                                    |    |               |                                               |    |               |                                              |    |               |                                                                                   |    |               |                                                             |    |               |                          |    |               |                    |    |               |                                                                                        |

|    |                                                                                  |                                                                                                                           |                                                                                                                                                                           |
|----|----------------------------------------------------------------------------------|---------------------------------------------------------------------------------------------------------------------------|---------------------------------------------------------------------------------------------------------------------------------------------------------------------------|
| 84 | mat_post_complem<br>Afficher le champ UNIQUEM<br>ENT si :<br>[pa_jumelage] = '0' | This/these meeting(s) with a patient advisor is/are in complementarity with the interventions of my health professionals: | radio (Matrice)<br>1 Strongly Disagree<br>2 Disagree<br>3 Neither agree nor disagree<br>4 Agree<br>5 Strongly agree<br>6 I don't know                                     |
| 85 | pa_postacc_mat2<br>Afficher le champ UNIQUEM<br>ENT si :<br>[pa_jumelage] = '0'  | How satisfied are you with the following?                                                                                 | descriptive                                                                                                                                                               |
| 86 | mat_post_freq<br>Afficher le champ UNIQUEM<br>ENT si :<br>[pa_jumelage] = '0'    | The frequency of your exchanges with the patient advisor                                                                  | radio (Matrice)<br>1 Very dissatisfied<br>2 Somewhat dissatisfied<br>3 Neither satisfied nor dissatisfied<br>4 Somewhat satisfied<br>5 Very satisfied<br>6 Not applicable |
| 87 | mat_post_dur<br>Afficher le champ UNIQUEM<br>ENT si :<br>[pa_jumelage] = '0'     | The duration of your exchanges with the patient advisor                                                                   | radio (Matrice)<br>1 Very dissatisfied<br>2 Somewhat dissatisfied<br>3 Neither satisfied nor dissatisfied<br>4 Somewhat satisfied<br>5 Very satisfied<br>6 Not applicable |
| 88 | mat_post_adapt<br>Afficher le champ UNIQUEM<br>ENT si :<br>[pa_jumelage] = '0'   | The adaptation of physical spaces to exchanges (confidentiality...)                                                       | radio (Matrice)<br>1 Very dissatisfied<br>2 Somewhat dissatisfied<br>3 Neither satisfied nor dissatisfied<br>4 Somewhat satisfied<br>5 Very satisfied<br>6 Not applicable |
| 89 | mat_post_facil<br>Afficher le champ UNIQUEM<br>ENT si :<br>[pa_jumelage] = '0'   | Ease of access to the patient advisor when needed                                                                         | radio (Matrice)<br>1 Very dissatisfied<br>2 Somewhat dissatisfied<br>3 Neither satisfied nor dissatisfied<br>4 Somewhat satisfied<br>5 Very satisfied<br>6 Not applicable |
| 90 | pa_recom<br>Afficher le champ UNIQUEM<br>ENT si :<br>[pa_jumelage] = '0'         | In the end, do you think this type of meeting would be interesting to deploy to help more patients and caregivers?        | radio<br>1 Yes, absolutely<br>2 Yes, but by reviewing some of the terms and conditions.<br>3 Rather not, it doesn't really matter<br>4 No, not at all                     |
| 91 | pa_recom_prcis<br>Afficher le champ UNIQUEM<br>ENT si :<br>[pa_recom] = '2'      | Please specify these terms and conditions to be reviewed                                                                  | text                                                                                                                                                                      |
| 92 | pa_bidon3_v2_v2<br>Afficher le champ UNIQUEM<br>ENT si :<br>[pa_jumelage] = '1'  | What topics would you like to discuss with a patient advisor? You can check more than one answer.                         | descriptive                                                                                                                                                               |

|    |                                                                                   |                                                                                      |                                                                                                                                                                                                                                                                                                                                                                                                                                                                                                                                                                                                                                                                                                                                                                                                                                                                                                                                                                                                                                                                                                                                                                                                                                                                                                                                                                                                                                                                                                                                                                                                                                                                                                                                                                                                                                                                                              |   |                      |                                                                                  |   |                      |                                                 |   |                      |                                                 |   |                      |                                           |   |                      |                                                                                      |   |                      |                                                |   |                      |                                                              |   |                      |                                  |   |                      |                     |   |                      |                                         |    |                       |                              |    |                       |                                     |    |                       |                                   |    |                       |                   |    |                       |                               |    |                       |                                               |    |                       |                           |    |                       |                   |
|----|-----------------------------------------------------------------------------------|--------------------------------------------------------------------------------------|----------------------------------------------------------------------------------------------------------------------------------------------------------------------------------------------------------------------------------------------------------------------------------------------------------------------------------------------------------------------------------------------------------------------------------------------------------------------------------------------------------------------------------------------------------------------------------------------------------------------------------------------------------------------------------------------------------------------------------------------------------------------------------------------------------------------------------------------------------------------------------------------------------------------------------------------------------------------------------------------------------------------------------------------------------------------------------------------------------------------------------------------------------------------------------------------------------------------------------------------------------------------------------------------------------------------------------------------------------------------------------------------------------------------------------------------------------------------------------------------------------------------------------------------------------------------------------------------------------------------------------------------------------------------------------------------------------------------------------------------------------------------------------------------------------------------------------------------------------------------------------------------|---|----------------------|----------------------------------------------------------------------------------|---|----------------------|-------------------------------------------------|---|----------------------|-------------------------------------------------|---|----------------------|-------------------------------------------|---|----------------------|--------------------------------------------------------------------------------------|---|----------------------|------------------------------------------------|---|----------------------|--------------------------------------------------------------|---|----------------------|----------------------------------|---|----------------------|---------------------|---|----------------------|-----------------------------------------|----|-----------------------|------------------------------|----|-----------------------|-------------------------------------|----|-----------------------|-----------------------------------|----|-----------------------|-------------------|----|-----------------------|-------------------------------|----|-----------------------|-----------------------------------------------|----|-----------------------|---------------------------|----|-----------------------|-------------------|
| 93 | pa_orgpo<br>Afficher le champ UNIQUEM<br>ENT si :<br>[pa_jumelage] = '1'          | Organizational aspects                                                               | checkbox <table border="1" data-bbox="1023 107 1495 618"> <tr> <td>0</td> <td>pa_orgpo__0</td> <td>Her/His role as a patient advisor</td> </tr> <tr> <td>1</td> <td>pa_orgpo__1</td> <td>The role of different health care professionals</td> </tr> <tr> <td>2</td> <td>pa_orgpo__2</td> <td>The role of external and internal organizations</td> </tr> <tr> <td>3</td> <td>pa_orgpo__3</td> <td>The care trajectory</td> </tr> <tr> <td>4</td> <td>pa_orgpo__4</td> <td>Rights as a patient (e.g., refusing treatment, asking questions)</td> </tr> <tr> <td>5</td> <td>pa_orgpo__5</td> <td>Where and how to get to medical appointments</td> </tr> <tr> <td>6</td> <td>pa_orgpo__6</td> <td>Financial support for patients and transportation assistance</td> </tr> <tr> <td>7</td> <td>pa_orgpo__7</td> <td>The Parole-Onco Research Project</td> </tr> <tr> <td>8</td> <td>pa_orgpo__8</td> <td>Other information</td> </tr> </table><br>Alignement personnalisé : LV                                                                                                                                                                                                                                                                                                                                                                                                                                                                                                                                                                                                                                                                                                                                                                                                                                                                                                                   | 0 | pa_orgpo__0          | Her/His role as a patient advisor                                                | 1 | pa_orgpo__1          | The role of different health care professionals | 2 | pa_orgpo__2          | The role of external and internal organizations | 3 | pa_orgpo__3          | The care trajectory                       | 4 | pa_orgpo__4          | Rights as a patient (e.g., refusing treatment, asking questions)                     | 5 | pa_orgpo__5          | Where and how to get to medical appointments   | 6 | pa_orgpo__6          | Financial support for patients and transportation assistance | 7 | pa_orgpo__7          | The Parole-Onco Research Project | 8 | pa_orgpo__8          | Other information   |   |                      |                                         |    |                       |                              |    |                       |                                     |    |                       |                                   |    |                       |                   |    |                       |                               |    |                       |                                               |    |                       |                           |    |                       |                   |
| 0  | pa_orgpo__0                                                                       | Her/His role as a patient advisor                                                    |                                                                                                                                                                                                                                                                                                                                                                                                                                                                                                                                                                                                                                                                                                                                                                                                                                                                                                                                                                                                                                                                                                                                                                                                                                                                                                                                                                                                                                                                                                                                                                                                                                                                                                                                                                                                                                                                                              |   |                      |                                                                                  |   |                      |                                                 |   |                      |                                                 |   |                      |                                           |   |                      |                                                                                      |   |                      |                                                |   |                      |                                                              |   |                      |                                  |   |                      |                     |   |                      |                                         |    |                       |                              |    |                       |                                     |    |                       |                                   |    |                       |                   |    |                       |                               |    |                       |                                               |    |                       |                           |    |                       |                   |
| 1  | pa_orgpo__1                                                                       | The role of different health care professionals                                      |                                                                                                                                                                                                                                                                                                                                                                                                                                                                                                                                                                                                                                                                                                                                                                                                                                                                                                                                                                                                                                                                                                                                                                                                                                                                                                                                                                                                                                                                                                                                                                                                                                                                                                                                                                                                                                                                                              |   |                      |                                                                                  |   |                      |                                                 |   |                      |                                                 |   |                      |                                           |   |                      |                                                                                      |   |                      |                                                |   |                      |                                                              |   |                      |                                  |   |                      |                     |   |                      |                                         |    |                       |                              |    |                       |                                     |    |                       |                                   |    |                       |                   |    |                       |                               |    |                       |                                               |    |                       |                           |    |                       |                   |
| 2  | pa_orgpo__2                                                                       | The role of external and internal organizations                                      |                                                                                                                                                                                                                                                                                                                                                                                                                                                                                                                                                                                                                                                                                                                                                                                                                                                                                                                                                                                                                                                                                                                                                                                                                                                                                                                                                                                                                                                                                                                                                                                                                                                                                                                                                                                                                                                                                              |   |                      |                                                                                  |   |                      |                                                 |   |                      |                                                 |   |                      |                                           |   |                      |                                                                                      |   |                      |                                                |   |                      |                                                              |   |                      |                                  |   |                      |                     |   |                      |                                         |    |                       |                              |    |                       |                                     |    |                       |                                   |    |                       |                   |    |                       |                               |    |                       |                                               |    |                       |                           |    |                       |                   |
| 3  | pa_orgpo__3                                                                       | The care trajectory                                                                  |                                                                                                                                                                                                                                                                                                                                                                                                                                                                                                                                                                                                                                                                                                                                                                                                                                                                                                                                                                                                                                                                                                                                                                                                                                                                                                                                                                                                                                                                                                                                                                                                                                                                                                                                                                                                                                                                                              |   |                      |                                                                                  |   |                      |                                                 |   |                      |                                                 |   |                      |                                           |   |                      |                                                                                      |   |                      |                                                |   |                      |                                                              |   |                      |                                  |   |                      |                     |   |                      |                                         |    |                       |                              |    |                       |                                     |    |                       |                                   |    |                       |                   |    |                       |                               |    |                       |                                               |    |                       |                           |    |                       |                   |
| 4  | pa_orgpo__4                                                                       | Rights as a patient (e.g., refusing treatment, asking questions)                     |                                                                                                                                                                                                                                                                                                                                                                                                                                                                                                                                                                                                                                                                                                                                                                                                                                                                                                                                                                                                                                                                                                                                                                                                                                                                                                                                                                                                                                                                                                                                                                                                                                                                                                                                                                                                                                                                                              |   |                      |                                                                                  |   |                      |                                                 |   |                      |                                                 |   |                      |                                           |   |                      |                                                                                      |   |                      |                                                |   |                      |                                                              |   |                      |                                  |   |                      |                     |   |                      |                                         |    |                       |                              |    |                       |                                     |    |                       |                                   |    |                       |                   |    |                       |                               |    |                       |                                               |    |                       |                           |    |                       |                   |
| 5  | pa_orgpo__5                                                                       | Where and how to get to medical appointments                                         |                                                                                                                                                                                                                                                                                                                                                                                                                                                                                                                                                                                                                                                                                                                                                                                                                                                                                                                                                                                                                                                                                                                                                                                                                                                                                                                                                                                                                                                                                                                                                                                                                                                                                                                                                                                                                                                                                              |   |                      |                                                                                  |   |                      |                                                 |   |                      |                                                 |   |                      |                                           |   |                      |                                                                                      |   |                      |                                                |   |                      |                                                              |   |                      |                                  |   |                      |                     |   |                      |                                         |    |                       |                              |    |                       |                                     |    |                       |                                   |    |                       |                   |    |                       |                               |    |                       |                                               |    |                       |                           |    |                       |                   |
| 6  | pa_orgpo__6                                                                       | Financial support for patients and transportation assistance                         |                                                                                                                                                                                                                                                                                                                                                                                                                                                                                                                                                                                                                                                                                                                                                                                                                                                                                                                                                                                                                                                                                                                                                                                                                                                                                                                                                                                                                                                                                                                                                                                                                                                                                                                                                                                                                                                                                              |   |                      |                                                                                  |   |                      |                                                 |   |                      |                                                 |   |                      |                                           |   |                      |                                                                                      |   |                      |                                                |   |                      |                                                              |   |                      |                                  |   |                      |                     |   |                      |                                         |    |                       |                              |    |                       |                                     |    |                       |                                   |    |                       |                   |    |                       |                               |    |                       |                                               |    |                       |                           |    |                       |                   |
| 7  | pa_orgpo__7                                                                       | The Parole-Onco Research Project                                                     |                                                                                                                                                                                                                                                                                                                                                                                                                                                                                                                                                                                                                                                                                                                                                                                                                                                                                                                                                                                                                                                                                                                                                                                                                                                                                                                                                                                                                                                                                                                                                                                                                                                                                                                                                                                                                                                                                              |   |                      |                                                                                  |   |                      |                                                 |   |                      |                                                 |   |                      |                                           |   |                      |                                                                                      |   |                      |                                                |   |                      |                                                              |   |                      |                                  |   |                      |                     |   |                      |                                         |    |                       |                              |    |                       |                                     |    |                       |                                   |    |                       |                   |    |                       |                               |    |                       |                                               |    |                       |                           |    |                       |                   |
| 8  | pa_orgpo__8                                                                       | Other information                                                                    |                                                                                                                                                                                                                                                                                                                                                                                                                                                                                                                                                                                                                                                                                                                                                                                                                                                                                                                                                                                                                                                                                                                                                                                                                                                                                                                                                                                                                                                                                                                                                                                                                                                                                                                                                                                                                                                                                              |   |                      |                                                                                  |   |                      |                                                 |   |                      |                                                 |   |                      |                                           |   |                      |                                                                                      |   |                      |                                                |   |                      |                                                              |   |                      |                                  |   |                      |                     |   |                      |                                         |    |                       |                              |    |                       |                                     |    |                       |                                   |    |                       |                   |    |                       |                               |    |                       |                                               |    |                       |                           |    |                       |                   |
| 94 | pa_asporg2_autre<br>Afficher le champ UNIQUEM<br>ENT si :<br>[pa_orgpo(8)] = '1'  | If other information, please specify which one:                                      | text<br>Alignement personnalisé : LV                                                                                                                                                                                                                                                                                                                                                                                                                                                                                                                                                                                                                                                                                                                                                                                                                                                                                                                                                                                                                                                                                                                                                                                                                                                                                                                                                                                                                                                                                                                                                                                                                                                                                                                                                                                                                                                         |   |                      |                                                                                  |   |                      |                                                 |   |                      |                                                 |   |                      |                                           |   |                      |                                                                                      |   |                      |                                                |   |                      |                                                              |   |                      |                                  |   |                      |                     |   |                      |                                         |    |                       |                              |    |                       |                                     |    |                       |                                   |    |                       |                   |    |                       |                               |    |                       |                                               |    |                       |                           |    |                       |                   |
| 95 | pa_ppaclipo_v2_v2<br>Afficher le champ UNIQUEM<br>ENT si :<br>[pa_jumelage] = '1' | Clinical aspects                                                                     | checkbox <table border="1" data-bbox="1023 837 1495 2033"> <tr> <td>0</td> <td>pa_ppaclipo_v2_v2__0</td> <td>The announcement of the cancer diagnosis or genetic predisposition by the doctor</td> </tr> <tr> <td>1</td> <td>pa_ppaclipo_v2_v2__1</td> <td>Cancer</td> </tr> <tr> <td>2</td> <td>pa_ppaclipo_v2_v2__2</td> <td>Genetic testing</td> </tr> <tr> <td>3</td> <td>pa_ppaclipo_v2_v2__3</td> <td>Therapeutic options in the case of cancer</td> </tr> <tr> <td>4</td> <td>pa_ppaclipo_v2_v2__4</td> <td>Ways to reduce risk in carriers of a gene mutation that increases the risk of cancer</td> </tr> <tr> <td>5</td> <td>pa_ppaclipo_v2_v2__5</td> <td>Surgical and reconstructive options for cancer</td> </tr> <tr> <td>6</td> <td>pa_ppaclipo_v2_v2__6</td> <td>Breast implants</td> </tr> <tr> <td>7</td> <td>pa_ppaclipo_v2_v2__7</td> <td>Hormonal issues</td> </tr> <tr> <td>8</td> <td>pa_ppaclipo_v2_v2__8</td> <td>Reproductive issues</td> </tr> <tr> <td>9</td> <td>pa_ppaclipo_v2_v2__9</td> <td>Urinary and erectile dysfunction issues</td> </tr> <tr> <td>10</td> <td>pa_ppaclipo_v2_v2__10</td> <td>Fatigue following treatments</td> </tr> <tr> <td>11</td> <td>pa_ppaclipo_v2_v2__11</td> <td>Pain and discomfort after treatment</td> </tr> <tr> <td>12</td> <td>pa_ppaclipo_v2_v2__12</td> <td>Pain and discomfort after surgery</td> </tr> <tr> <td>13</td> <td>pa_ppaclipo_v2_v2__13</td> <td>Possible emotions</td> </tr> <tr> <td>14</td> <td>pa_ppaclipo_v2_v2__14</td> <td>Stress and anxiety management</td> </tr> <tr> <td>15</td> <td>pa_ppaclipo_v2_v2__15</td> <td>Impact on physical appearance and self-esteem</td> </tr> <tr> <td>16</td> <td>pa_ppaclipo_v2_v2__16</td> <td>Decision-making processes</td> </tr> <tr> <td>17</td> <td>pa_ppaclipo_v2_v2__17</td> <td>Other information</td> </tr> </table><br>Alignement personnalisé : LV | 0 | pa_ppaclipo_v2_v2__0 | The announcement of the cancer diagnosis or genetic predisposition by the doctor | 1 | pa_ppaclipo_v2_v2__1 | Cancer                                          | 2 | pa_ppaclipo_v2_v2__2 | Genetic testing                                 | 3 | pa_ppaclipo_v2_v2__3 | Therapeutic options in the case of cancer | 4 | pa_ppaclipo_v2_v2__4 | Ways to reduce risk in carriers of a gene mutation that increases the risk of cancer | 5 | pa_ppaclipo_v2_v2__5 | Surgical and reconstructive options for cancer | 6 | pa_ppaclipo_v2_v2__6 | Breast implants                                              | 7 | pa_ppaclipo_v2_v2__7 | Hormonal issues                  | 8 | pa_ppaclipo_v2_v2__8 | Reproductive issues | 9 | pa_ppaclipo_v2_v2__9 | Urinary and erectile dysfunction issues | 10 | pa_ppaclipo_v2_v2__10 | Fatigue following treatments | 11 | pa_ppaclipo_v2_v2__11 | Pain and discomfort after treatment | 12 | pa_ppaclipo_v2_v2__12 | Pain and discomfort after surgery | 13 | pa_ppaclipo_v2_v2__13 | Possible emotions | 14 | pa_ppaclipo_v2_v2__14 | Stress and anxiety management | 15 | pa_ppaclipo_v2_v2__15 | Impact on physical appearance and self-esteem | 16 | pa_ppaclipo_v2_v2__16 | Decision-making processes | 17 | pa_ppaclipo_v2_v2__17 | Other information |
| 0  | pa_ppaclipo_v2_v2__0                                                              | The announcement of the cancer diagnosis or genetic predisposition by the doctor     |                                                                                                                                                                                                                                                                                                                                                                                                                                                                                                                                                                                                                                                                                                                                                                                                                                                                                                                                                                                                                                                                                                                                                                                                                                                                                                                                                                                                                                                                                                                                                                                                                                                                                                                                                                                                                                                                                              |   |                      |                                                                                  |   |                      |                                                 |   |                      |                                                 |   |                      |                                           |   |                      |                                                                                      |   |                      |                                                |   |                      |                                                              |   |                      |                                  |   |                      |                     |   |                      |                                         |    |                       |                              |    |                       |                                     |    |                       |                                   |    |                       |                   |    |                       |                               |    |                       |                                               |    |                       |                           |    |                       |                   |
| 1  | pa_ppaclipo_v2_v2__1                                                              | Cancer                                                                               |                                                                                                                                                                                                                                                                                                                                                                                                                                                                                                                                                                                                                                                                                                                                                                                                                                                                                                                                                                                                                                                                                                                                                                                                                                                                                                                                                                                                                                                                                                                                                                                                                                                                                                                                                                                                                                                                                              |   |                      |                                                                                  |   |                      |                                                 |   |                      |                                                 |   |                      |                                           |   |                      |                                                                                      |   |                      |                                                |   |                      |                                                              |   |                      |                                  |   |                      |                     |   |                      |                                         |    |                       |                              |    |                       |                                     |    |                       |                                   |    |                       |                   |    |                       |                               |    |                       |                                               |    |                       |                           |    |                       |                   |
| 2  | pa_ppaclipo_v2_v2__2                                                              | Genetic testing                                                                      |                                                                                                                                                                                                                                                                                                                                                                                                                                                                                                                                                                                                                                                                                                                                                                                                                                                                                                                                                                                                                                                                                                                                                                                                                                                                                                                                                                                                                                                                                                                                                                                                                                                                                                                                                                                                                                                                                              |   |                      |                                                                                  |   |                      |                                                 |   |                      |                                                 |   |                      |                                           |   |                      |                                                                                      |   |                      |                                                |   |                      |                                                              |   |                      |                                  |   |                      |                     |   |                      |                                         |    |                       |                              |    |                       |                                     |    |                       |                                   |    |                       |                   |    |                       |                               |    |                       |                                               |    |                       |                           |    |                       |                   |
| 3  | pa_ppaclipo_v2_v2__3                                                              | Therapeutic options in the case of cancer                                            |                                                                                                                                                                                                                                                                                                                                                                                                                                                                                                                                                                                                                                                                                                                                                                                                                                                                                                                                                                                                                                                                                                                                                                                                                                                                                                                                                                                                                                                                                                                                                                                                                                                                                                                                                                                                                                                                                              |   |                      |                                                                                  |   |                      |                                                 |   |                      |                                                 |   |                      |                                           |   |                      |                                                                                      |   |                      |                                                |   |                      |                                                              |   |                      |                                  |   |                      |                     |   |                      |                                         |    |                       |                              |    |                       |                                     |    |                       |                                   |    |                       |                   |    |                       |                               |    |                       |                                               |    |                       |                           |    |                       |                   |
| 4  | pa_ppaclipo_v2_v2__4                                                              | Ways to reduce risk in carriers of a gene mutation that increases the risk of cancer |                                                                                                                                                                                                                                                                                                                                                                                                                                                                                                                                                                                                                                                                                                                                                                                                                                                                                                                                                                                                                                                                                                                                                                                                                                                                                                                                                                                                                                                                                                                                                                                                                                                                                                                                                                                                                                                                                              |   |                      |                                                                                  |   |                      |                                                 |   |                      |                                                 |   |                      |                                           |   |                      |                                                                                      |   |                      |                                                |   |                      |                                                              |   |                      |                                  |   |                      |                     |   |                      |                                         |    |                       |                              |    |                       |                                     |    |                       |                                   |    |                       |                   |    |                       |                               |    |                       |                                               |    |                       |                           |    |                       |                   |
| 5  | pa_ppaclipo_v2_v2__5                                                              | Surgical and reconstructive options for cancer                                       |                                                                                                                                                                                                                                                                                                                                                                                                                                                                                                                                                                                                                                                                                                                                                                                                                                                                                                                                                                                                                                                                                                                                                                                                                                                                                                                                                                                                                                                                                                                                                                                                                                                                                                                                                                                                                                                                                              |   |                      |                                                                                  |   |                      |                                                 |   |                      |                                                 |   |                      |                                           |   |                      |                                                                                      |   |                      |                                                |   |                      |                                                              |   |                      |                                  |   |                      |                     |   |                      |                                         |    |                       |                              |    |                       |                                     |    |                       |                                   |    |                       |                   |    |                       |                               |    |                       |                                               |    |                       |                           |    |                       |                   |
| 6  | pa_ppaclipo_v2_v2__6                                                              | Breast implants                                                                      |                                                                                                                                                                                                                                                                                                                                                                                                                                                                                                                                                                                                                                                                                                                                                                                                                                                                                                                                                                                                                                                                                                                                                                                                                                                                                                                                                                                                                                                                                                                                                                                                                                                                                                                                                                                                                                                                                              |   |                      |                                                                                  |   |                      |                                                 |   |                      |                                                 |   |                      |                                           |   |                      |                                                                                      |   |                      |                                                |   |                      |                                                              |   |                      |                                  |   |                      |                     |   |                      |                                         |    |                       |                              |    |                       |                                     |    |                       |                                   |    |                       |                   |    |                       |                               |    |                       |                                               |    |                       |                           |    |                       |                   |
| 7  | pa_ppaclipo_v2_v2__7                                                              | Hormonal issues                                                                      |                                                                                                                                                                                                                                                                                                                                                                                                                                                                                                                                                                                                                                                                                                                                                                                                                                                                                                                                                                                                                                                                                                                                                                                                                                                                                                                                                                                                                                                                                                                                                                                                                                                                                                                                                                                                                                                                                              |   |                      |                                                                                  |   |                      |                                                 |   |                      |                                                 |   |                      |                                           |   |                      |                                                                                      |   |                      |                                                |   |                      |                                                              |   |                      |                                  |   |                      |                     |   |                      |                                         |    |                       |                              |    |                       |                                     |    |                       |                                   |    |                       |                   |    |                       |                               |    |                       |                                               |    |                       |                           |    |                       |                   |
| 8  | pa_ppaclipo_v2_v2__8                                                              | Reproductive issues                                                                  |                                                                                                                                                                                                                                                                                                                                                                                                                                                                                                                                                                                                                                                                                                                                                                                                                                                                                                                                                                                                                                                                                                                                                                                                                                                                                                                                                                                                                                                                                                                                                                                                                                                                                                                                                                                                                                                                                              |   |                      |                                                                                  |   |                      |                                                 |   |                      |                                                 |   |                      |                                           |   |                      |                                                                                      |   |                      |                                                |   |                      |                                                              |   |                      |                                  |   |                      |                     |   |                      |                                         |    |                       |                              |    |                       |                                     |    |                       |                                   |    |                       |                   |    |                       |                               |    |                       |                                               |    |                       |                           |    |                       |                   |
| 9  | pa_ppaclipo_v2_v2__9                                                              | Urinary and erectile dysfunction issues                                              |                                                                                                                                                                                                                                                                                                                                                                                                                                                                                                                                                                                                                                                                                                                                                                                                                                                                                                                                                                                                                                                                                                                                                                                                                                                                                                                                                                                                                                                                                                                                                                                                                                                                                                                                                                                                                                                                                              |   |                      |                                                                                  |   |                      |                                                 |   |                      |                                                 |   |                      |                                           |   |                      |                                                                                      |   |                      |                                                |   |                      |                                                              |   |                      |                                  |   |                      |                     |   |                      |                                         |    |                       |                              |    |                       |                                     |    |                       |                                   |    |                       |                   |    |                       |                               |    |                       |                                               |    |                       |                           |    |                       |                   |
| 10 | pa_ppaclipo_v2_v2__10                                                             | Fatigue following treatments                                                         |                                                                                                                                                                                                                                                                                                                                                                                                                                                                                                                                                                                                                                                                                                                                                                                                                                                                                                                                                                                                                                                                                                                                                                                                                                                                                                                                                                                                                                                                                                                                                                                                                                                                                                                                                                                                                                                                                              |   |                      |                                                                                  |   |                      |                                                 |   |                      |                                                 |   |                      |                                           |   |                      |                                                                                      |   |                      |                                                |   |                      |                                                              |   |                      |                                  |   |                      |                     |   |                      |                                         |    |                       |                              |    |                       |                                     |    |                       |                                   |    |                       |                   |    |                       |                               |    |                       |                                               |    |                       |                           |    |                       |                   |
| 11 | pa_ppaclipo_v2_v2__11                                                             | Pain and discomfort after treatment                                                  |                                                                                                                                                                                                                                                                                                                                                                                                                                                                                                                                                                                                                                                                                                                                                                                                                                                                                                                                                                                                                                                                                                                                                                                                                                                                                                                                                                                                                                                                                                                                                                                                                                                                                                                                                                                                                                                                                              |   |                      |                                                                                  |   |                      |                                                 |   |                      |                                                 |   |                      |                                           |   |                      |                                                                                      |   |                      |                                                |   |                      |                                                              |   |                      |                                  |   |                      |                     |   |                      |                                         |    |                       |                              |    |                       |                                     |    |                       |                                   |    |                       |                   |    |                       |                               |    |                       |                                               |    |                       |                           |    |                       |                   |
| 12 | pa_ppaclipo_v2_v2__12                                                             | Pain and discomfort after surgery                                                    |                                                                                                                                                                                                                                                                                                                                                                                                                                                                                                                                                                                                                                                                                                                                                                                                                                                                                                                                                                                                                                                                                                                                                                                                                                                                                                                                                                                                                                                                                                                                                                                                                                                                                                                                                                                                                                                                                              |   |                      |                                                                                  |   |                      |                                                 |   |                      |                                                 |   |                      |                                           |   |                      |                                                                                      |   |                      |                                                |   |                      |                                                              |   |                      |                                  |   |                      |                     |   |                      |                                         |    |                       |                              |    |                       |                                     |    |                       |                                   |    |                       |                   |    |                       |                               |    |                       |                                               |    |                       |                           |    |                       |                   |
| 13 | pa_ppaclipo_v2_v2__13                                                             | Possible emotions                                                                    |                                                                                                                                                                                                                                                                                                                                                                                                                                                                                                                                                                                                                                                                                                                                                                                                                                                                                                                                                                                                                                                                                                                                                                                                                                                                                                                                                                                                                                                                                                                                                                                                                                                                                                                                                                                                                                                                                              |   |                      |                                                                                  |   |                      |                                                 |   |                      |                                                 |   |                      |                                           |   |                      |                                                                                      |   |                      |                                                |   |                      |                                                              |   |                      |                                  |   |                      |                     |   |                      |                                         |    |                       |                              |    |                       |                                     |    |                       |                                   |    |                       |                   |    |                       |                               |    |                       |                                               |    |                       |                           |    |                       |                   |
| 14 | pa_ppaclipo_v2_v2__14                                                             | Stress and anxiety management                                                        |                                                                                                                                                                                                                                                                                                                                                                                                                                                                                                                                                                                                                                                                                                                                                                                                                                                                                                                                                                                                                                                                                                                                                                                                                                                                                                                                                                                                                                                                                                                                                                                                                                                                                                                                                                                                                                                                                              |   |                      |                                                                                  |   |                      |                                                 |   |                      |                                                 |   |                      |                                           |   |                      |                                                                                      |   |                      |                                                |   |                      |                                                              |   |                      |                                  |   |                      |                     |   |                      |                                         |    |                       |                              |    |                       |                                     |    |                       |                                   |    |                       |                   |    |                       |                               |    |                       |                                               |    |                       |                           |    |                       |                   |
| 15 | pa_ppaclipo_v2_v2__15                                                             | Impact on physical appearance and self-esteem                                        |                                                                                                                                                                                                                                                                                                                                                                                                                                                                                                                                                                                                                                                                                                                                                                                                                                                                                                                                                                                                                                                                                                                                                                                                                                                                                                                                                                                                                                                                                                                                                                                                                                                                                                                                                                                                                                                                                              |   |                      |                                                                                  |   |                      |                                                 |   |                      |                                                 |   |                      |                                           |   |                      |                                                                                      |   |                      |                                                |   |                      |                                                              |   |                      |                                  |   |                      |                     |   |                      |                                         |    |                       |                              |    |                       |                                     |    |                       |                                   |    |                       |                   |    |                       |                               |    |                       |                                               |    |                       |                           |    |                       |                   |
| 16 | pa_ppaclipo_v2_v2__16                                                             | Decision-making processes                                                            |                                                                                                                                                                                                                                                                                                                                                                                                                                                                                                                                                                                                                                                                                                                                                                                                                                                                                                                                                                                                                                                                                                                                                                                                                                                                                                                                                                                                                                                                                                                                                                                                                                                                                                                                                                                                                                                                                              |   |                      |                                                                                  |   |                      |                                                 |   |                      |                                                 |   |                      |                                           |   |                      |                                                                                      |   |                      |                                                |   |                      |                                                              |   |                      |                                  |   |                      |                     |   |                      |                                         |    |                       |                              |    |                       |                                     |    |                       |                                   |    |                       |                   |    |                       |                               |    |                       |                                               |    |                       |                           |    |                       |                   |
| 17 | pa_ppaclipo_v2_v2__17                                                             | Other information                                                                    |                                                                                                                                                                                                                                                                                                                                                                                                                                                                                                                                                                                                                                                                                                                                                                                                                                                                                                                                                                                                                                                                                                                                                                                                                                                                                                                                                                                                                                                                                                                                                                                                                                                                                                                                                                                                                                                                                              |   |                      |                                                                                  |   |                      |                                                 |   |                      |                                                 |   |                      |                                           |   |                      |                                                                                      |   |                      |                                                |   |                      |                                                              |   |                      |                                  |   |                      |                     |   |                      |                                         |    |                       |                              |    |                       |                                     |    |                       |                                   |    |                       |                   |    |                       |                               |    |                       |                                               |    |                       |                           |    |                       |                   |

|    |                                                                                             |                                                             |                                                                                                                                                                                                                                                                                                                                                                                                                                                                                                                                                                                                                                                                                                                                                                                                                                                                                                                                                                                                                                                                                                                                                                                                                                                                                                                                                                                                                            |   |             |                            |   |             |                          |   |             |                               |   |             |                             |   |             |                   |   |             |                          |   |             |                                        |   |             |                                                |   |             |                        |    |              |                           |    |              |                                   |    |              |                                            |    |              |                                                             |    |              |                                        |    |              |                   |
|----|---------------------------------------------------------------------------------------------|-------------------------------------------------------------|----------------------------------------------------------------------------------------------------------------------------------------------------------------------------------------------------------------------------------------------------------------------------------------------------------------------------------------------------------------------------------------------------------------------------------------------------------------------------------------------------------------------------------------------------------------------------------------------------------------------------------------------------------------------------------------------------------------------------------------------------------------------------------------------------------------------------------------------------------------------------------------------------------------------------------------------------------------------------------------------------------------------------------------------------------------------------------------------------------------------------------------------------------------------------------------------------------------------------------------------------------------------------------------------------------------------------------------------------------------------------------------------------------------------------|---|-------------|----------------------------|---|-------------|--------------------------|---|-------------|-------------------------------|---|-------------|-----------------------------|---|-------------|-------------------|---|-------------|--------------------------|---|-------------|----------------------------------------|---|-------------|------------------------------------------------|---|-------------|------------------------|----|--------------|---------------------------|----|--------------|-----------------------------------|----|--------------|--------------------------------------------|----|--------------|-------------------------------------------------------------|----|--------------|----------------------------------------|----|--------------|-------------------|
| 96 | pa_apsclin2_autre<br>Afficher le champ UNIQUEM<br>ENT si :<br>[pa_ppaclipo_v2_v2(17)] = '1' | If other information, please specify which one:             | text<br>Alignement personnalisé : LV                                                                                                                                                                                                                                                                                                                                                                                                                                                                                                                                                                                                                                                                                                                                                                                                                                                                                                                                                                                                                                                                                                                                                                                                                                                                                                                                                                                       |   |             |                            |   |             |                          |   |             |                               |   |             |                             |   |             |                   |   |             |                          |   |             |                                        |   |             |                                                |   |             |                        |    |              |                           |    |              |                                   |    |              |                                            |    |              |                                                             |    |              |                                        |    |              |                   |
| 97 | pa_quopo<br>Afficher le champ UNIQUEM<br>ENT si :<br>[pa_jumelage] = '1'                    | Consequences on daily life                                  | checkbox <table border="1" data-bbox="1023 241 1495 1032"> <tr> <td>1</td> <td>pa_quopo__1</td> <td>Consequences on daily life</td> </tr> <tr> <td>2</td> <td>pa_quopo__2</td> <td>Consequences on children</td> </tr> <tr> <td>3</td> <td>pa_quopo__3</td> <td>Consequences on conjugal life</td> </tr> <tr> <td>4</td> <td>pa_quopo__4</td> <td>Consequences on sexual life</td> </tr> <tr> <td>5</td> <td>pa_quopo__5</td> <td>Returning to work</td> </tr> <tr> <td>6</td> <td>pa_quopo__6</td> <td>The return to daily life</td> </tr> <tr> <td>7</td> <td>pa_quopo__7</td> <td>The consequences on the spiritual life</td> </tr> <tr> <td>8</td> <td>pa_quopo__8</td> <td>How to announce a diagnosis to your loved ones</td> </tr> <tr> <td>9</td> <td>pa_quopo__9</td> <td>Financial implications</td> </tr> <tr> <td>10</td> <td>pa_quopo__10</td> <td>Consequences on insurance</td> </tr> <tr> <td>11</td> <td>pa_quopo__11</td> <td>Consequences on professional life</td> </tr> <tr> <td>12</td> <td>pa_quopo__12</td> <td>Social perception (the reaction of others)</td> </tr> <tr> <td>13</td> <td>pa_quopo__13</td> <td>Strategies for living the treatments in the best conditions</td> </tr> <tr> <td>14</td> <td>pa_quopo__14</td> <td>How to regain control over the disease</td> </tr> <tr> <td>15</td> <td>pa_quopo__15</td> <td>Other information</td> </tr> </table> Alignement personnalisé : LV | 1 | pa_quopo__1 | Consequences on daily life | 2 | pa_quopo__2 | Consequences on children | 3 | pa_quopo__3 | Consequences on conjugal life | 4 | pa_quopo__4 | Consequences on sexual life | 5 | pa_quopo__5 | Returning to work | 6 | pa_quopo__6 | The return to daily life | 7 | pa_quopo__7 | The consequences on the spiritual life | 8 | pa_quopo__8 | How to announce a diagnosis to your loved ones | 9 | pa_quopo__9 | Financial implications | 10 | pa_quopo__10 | Consequences on insurance | 11 | pa_quopo__11 | Consequences on professional life | 12 | pa_quopo__12 | Social perception (the reaction of others) | 13 | pa_quopo__13 | Strategies for living the treatments in the best conditions | 14 | pa_quopo__14 | How to regain control over the disease | 15 | pa_quopo__15 | Other information |
| 1  | pa_quopo__1                                                                                 | Consequences on daily life                                  |                                                                                                                                                                                                                                                                                                                                                                                                                                                                                                                                                                                                                                                                                                                                                                                                                                                                                                                                                                                                                                                                                                                                                                                                                                                                                                                                                                                                                            |   |             |                            |   |             |                          |   |             |                               |   |             |                             |   |             |                   |   |             |                          |   |             |                                        |   |             |                                                |   |             |                        |    |              |                           |    |              |                                   |    |              |                                            |    |              |                                                             |    |              |                                        |    |              |                   |
| 2  | pa_quopo__2                                                                                 | Consequences on children                                    |                                                                                                                                                                                                                                                                                                                                                                                                                                                                                                                                                                                                                                                                                                                                                                                                                                                                                                                                                                                                                                                                                                                                                                                                                                                                                                                                                                                                                            |   |             |                            |   |             |                          |   |             |                               |   |             |                             |   |             |                   |   |             |                          |   |             |                                        |   |             |                                                |   |             |                        |    |              |                           |    |              |                                   |    |              |                                            |    |              |                                                             |    |              |                                        |    |              |                   |
| 3  | pa_quopo__3                                                                                 | Consequences on conjugal life                               |                                                                                                                                                                                                                                                                                                                                                                                                                                                                                                                                                                                                                                                                                                                                                                                                                                                                                                                                                                                                                                                                                                                                                                                                                                                                                                                                                                                                                            |   |             |                            |   |             |                          |   |             |                               |   |             |                             |   |             |                   |   |             |                          |   |             |                                        |   |             |                                                |   |             |                        |    |              |                           |    |              |                                   |    |              |                                            |    |              |                                                             |    |              |                                        |    |              |                   |
| 4  | pa_quopo__4                                                                                 | Consequences on sexual life                                 |                                                                                                                                                                                                                                                                                                                                                                                                                                                                                                                                                                                                                                                                                                                                                                                                                                                                                                                                                                                                                                                                                                                                                                                                                                                                                                                                                                                                                            |   |             |                            |   |             |                          |   |             |                               |   |             |                             |   |             |                   |   |             |                          |   |             |                                        |   |             |                                                |   |             |                        |    |              |                           |    |              |                                   |    |              |                                            |    |              |                                                             |    |              |                                        |    |              |                   |
| 5  | pa_quopo__5                                                                                 | Returning to work                                           |                                                                                                                                                                                                                                                                                                                                                                                                                                                                                                                                                                                                                                                                                                                                                                                                                                                                                                                                                                                                                                                                                                                                                                                                                                                                                                                                                                                                                            |   |             |                            |   |             |                          |   |             |                               |   |             |                             |   |             |                   |   |             |                          |   |             |                                        |   |             |                                                |   |             |                        |    |              |                           |    |              |                                   |    |              |                                            |    |              |                                                             |    |              |                                        |    |              |                   |
| 6  | pa_quopo__6                                                                                 | The return to daily life                                    |                                                                                                                                                                                                                                                                                                                                                                                                                                                                                                                                                                                                                                                                                                                                                                                                                                                                                                                                                                                                                                                                                                                                                                                                                                                                                                                                                                                                                            |   |             |                            |   |             |                          |   |             |                               |   |             |                             |   |             |                   |   |             |                          |   |             |                                        |   |             |                                                |   |             |                        |    |              |                           |    |              |                                   |    |              |                                            |    |              |                                                             |    |              |                                        |    |              |                   |
| 7  | pa_quopo__7                                                                                 | The consequences on the spiritual life                      |                                                                                                                                                                                                                                                                                                                                                                                                                                                                                                                                                                                                                                                                                                                                                                                                                                                                                                                                                                                                                                                                                                                                                                                                                                                                                                                                                                                                                            |   |             |                            |   |             |                          |   |             |                               |   |             |                             |   |             |                   |   |             |                          |   |             |                                        |   |             |                                                |   |             |                        |    |              |                           |    |              |                                   |    |              |                                            |    |              |                                                             |    |              |                                        |    |              |                   |
| 8  | pa_quopo__8                                                                                 | How to announce a diagnosis to your loved ones              |                                                                                                                                                                                                                                                                                                                                                                                                                                                                                                                                                                                                                                                                                                                                                                                                                                                                                                                                                                                                                                                                                                                                                                                                                                                                                                                                                                                                                            |   |             |                            |   |             |                          |   |             |                               |   |             |                             |   |             |                   |   |             |                          |   |             |                                        |   |             |                                                |   |             |                        |    |              |                           |    |              |                                   |    |              |                                            |    |              |                                                             |    |              |                                        |    |              |                   |
| 9  | pa_quopo__9                                                                                 | Financial implications                                      |                                                                                                                                                                                                                                                                                                                                                                                                                                                                                                                                                                                                                                                                                                                                                                                                                                                                                                                                                                                                                                                                                                                                                                                                                                                                                                                                                                                                                            |   |             |                            |   |             |                          |   |             |                               |   |             |                             |   |             |                   |   |             |                          |   |             |                                        |   |             |                                                |   |             |                        |    |              |                           |    |              |                                   |    |              |                                            |    |              |                                                             |    |              |                                        |    |              |                   |
| 10 | pa_quopo__10                                                                                | Consequences on insurance                                   |                                                                                                                                                                                                                                                                                                                                                                                                                                                                                                                                                                                                                                                                                                                                                                                                                                                                                                                                                                                                                                                                                                                                                                                                                                                                                                                                                                                                                            |   |             |                            |   |             |                          |   |             |                               |   |             |                             |   |             |                   |   |             |                          |   |             |                                        |   |             |                                                |   |             |                        |    |              |                           |    |              |                                   |    |              |                                            |    |              |                                                             |    |              |                                        |    |              |                   |
| 11 | pa_quopo__11                                                                                | Consequences on professional life                           |                                                                                                                                                                                                                                                                                                                                                                                                                                                                                                                                                                                                                                                                                                                                                                                                                                                                                                                                                                                                                                                                                                                                                                                                                                                                                                                                                                                                                            |   |             |                            |   |             |                          |   |             |                               |   |             |                             |   |             |                   |   |             |                          |   |             |                                        |   |             |                                                |   |             |                        |    |              |                           |    |              |                                   |    |              |                                            |    |              |                                                             |    |              |                                        |    |              |                   |
| 12 | pa_quopo__12                                                                                | Social perception (the reaction of others)                  |                                                                                                                                                                                                                                                                                                                                                                                                                                                                                                                                                                                                                                                                                                                                                                                                                                                                                                                                                                                                                                                                                                                                                                                                                                                                                                                                                                                                                            |   |             |                            |   |             |                          |   |             |                               |   |             |                             |   |             |                   |   |             |                          |   |             |                                        |   |             |                                                |   |             |                        |    |              |                           |    |              |                                   |    |              |                                            |    |              |                                                             |    |              |                                        |    |              |                   |
| 13 | pa_quopo__13                                                                                | Strategies for living the treatments in the best conditions |                                                                                                                                                                                                                                                                                                                                                                                                                                                                                                                                                                                                                                                                                                                                                                                                                                                                                                                                                                                                                                                                                                                                                                                                                                                                                                                                                                                                                            |   |             |                            |   |             |                          |   |             |                               |   |             |                             |   |             |                   |   |             |                          |   |             |                                        |   |             |                                                |   |             |                        |    |              |                           |    |              |                                   |    |              |                                            |    |              |                                                             |    |              |                                        |    |              |                   |
| 14 | pa_quopo__14                                                                                | How to regain control over the disease                      |                                                                                                                                                                                                                                                                                                                                                                                                                                                                                                                                                                                                                                                                                                                                                                                                                                                                                                                                                                                                                                                                                                                                                                                                                                                                                                                                                                                                                            |   |             |                            |   |             |                          |   |             |                               |   |             |                             |   |             |                   |   |             |                          |   |             |                                        |   |             |                                                |   |             |                        |    |              |                           |    |              |                                   |    |              |                                            |    |              |                                                             |    |              |                                        |    |              |                   |
| 15 | pa_quopo__15                                                                                | Other information                                           |                                                                                                                                                                                                                                                                                                                                                                                                                                                                                                                                                                                                                                                                                                                                                                                                                                                                                                                                                                                                                                                                                                                                                                                                                                                                                                                                                                                                                            |   |             |                            |   |             |                          |   |             |                               |   |             |                             |   |             |                   |   |             |                          |   |             |                                        |   |             |                                                |   |             |                        |    |              |                           |    |              |                                   |    |              |                                            |    |              |                                                             |    |              |                                        |    |              |                   |
| 98 | pa_ppaquopoautre_v2_v2<br>Afficher le champ UNIQUEM<br>ENT si :<br>[pa_quopo(15)] = '1'     | If other information, please specify which one:             | text<br>Alignement personnalisé : LV                                                                                                                                                                                                                                                                                                                                                                                                                                                                                                                                                                                                                                                                                                                                                                                                                                                                                                                                                                                                                                                                                                                                                                                                                                                                                                                                                                                       |   |             |                            |   |             |                          |   |             |                               |   |             |                             |   |             |                   |   |             |                          |   |             |                                        |   |             |                                                |   |             |                        |    |              |                           |    |              |                                   |    |              |                                            |    |              |                                                             |    |              |                                        |    |              |                   |

|                                                                                                                                                                              |                                                                                                |                                                                                                                                                                                                                                            |                                                                                                                                                                                                                                                                                                                                                                                                                                                                                                                                                                                                                                                                                                                                                                                                                                                                                                                                                                                                                                                                                                                                                                                                                                                                                                                                                                                                                                                                                                                                                                                                                                                                                                                                                                                                                                                             |   |                |                    |                                       |                |                                |   |                |                     |   |                |                                                                                          |   |                |                                                                    |   |                |                                                                                    |   |                |                                 |   |                |                                                |   |                |                                               |    |                 |                                                    |    |                 |                                               |    |                 |                                              |    |                 |                                                                                   |    |                 |                                                             |    |                 |                          |    |                 |                    |    |                 |                                                                                        |
|------------------------------------------------------------------------------------------------------------------------------------------------------------------------------|------------------------------------------------------------------------------------------------|--------------------------------------------------------------------------------------------------------------------------------------------------------------------------------------------------------------------------------------------|-------------------------------------------------------------------------------------------------------------------------------------------------------------------------------------------------------------------------------------------------------------------------------------------------------------------------------------------------------------------------------------------------------------------------------------------------------------------------------------------------------------------------------------------------------------------------------------------------------------------------------------------------------------------------------------------------------------------------------------------------------------------------------------------------------------------------------------------------------------------------------------------------------------------------------------------------------------------------------------------------------------------------------------------------------------------------------------------------------------------------------------------------------------------------------------------------------------------------------------------------------------------------------------------------------------------------------------------------------------------------------------------------------------------------------------------------------------------------------------------------------------------------------------------------------------------------------------------------------------------------------------------------------------------------------------------------------------------------------------------------------------------------------------------------------------------------------------------------------------|---|----------------|--------------------|---------------------------------------|----------------|--------------------------------|---|----------------|---------------------|---|----------------|------------------------------------------------------------------------------------------|---|----------------|--------------------------------------------------------------------|---|----------------|------------------------------------------------------------------------------------|---|----------------|---------------------------------|---|----------------|------------------------------------------------|---|----------------|-----------------------------------------------|----|-----------------|----------------------------------------------------|----|-----------------|-----------------------------------------------|----|-----------------|----------------------------------------------|----|-----------------|-----------------------------------------------------------------------------------|----|-----------------|-------------------------------------------------------------|----|-----------------|--------------------------|----|-----------------|--------------------|----|-----------------|----------------------------------------------------------------------------------------|
| 99                                                                                                                                                                           | pa_contripo<br>Afficher le champ UNIQUEMENT si :<br>[pa_jumelage] = '1' or [pa_jumelage] = '2' | In your opinion, what could be the contribution of the patient advisor?                                                                                                                                                                    | checkbox<br><table border="1"> <tr><td>1</td><td>pa_contripo__1</td><td>Giving information</td></tr> <tr><td>2</td><td>pa_contripo__2</td><td>Giving support</td></tr> <tr><td>3</td><td>pa_contripo__3</td><td>Sharing experiences</td></tr> <tr><td>4</td><td>pa_contripo__4</td><td>Facilitate communication between the health care team and the patient being accompanied.</td></tr> <tr><td>5</td><td>pa_contripo__5</td><td>Helping to bring the patient's perspective to the health care team</td></tr> <tr><td>6</td><td>pa_contripo__6</td><td>Improving understanding of information shared between patient and health care team</td></tr> <tr><td>7</td><td>pa_contripo__7</td><td>Helping to remember information</td></tr> <tr><td>8</td><td>pa_contripo__8</td><td>Preparing the patient for medical appointments</td></tr> <tr><td>9</td><td>pa_contripo__9</td><td>Accompanying patients to medical appointments</td></tr> <tr><td>10</td><td>pa_contripo__10</td><td>Helping the patient participate in decision making</td></tr> <tr><td>11</td><td>pa_contripo__11</td><td>Bringing a new perspective to decision making</td></tr> <tr><td>12</td><td>pa_contripo__12</td><td>Referring patients to a variety of resources</td></tr> <tr><td>13</td><td>pa_contripo__13</td><td>Help develop a trusting relationship between the patient and the health care team</td></tr> <tr><td>14</td><td>pa_contripo__14</td><td>Helping the patient become a partner in his or her own care</td></tr> <tr><td>15</td><td>pa_contripo__15</td><td>Listening to the patient</td></tr> <tr><td>16</td><td>pa_contripo__16</td><td>Other contribution</td></tr> <tr><td>17</td><td>pa_contripo__17</td><td>No, the patient advisor has no particular contribution to make to the care trajectory.</td></tr> </table><br>Alignement personnalisé : LV | 1 | pa_contripo__1 | Giving information | 2                                     | pa_contripo__2 | Giving support                 | 3 | pa_contripo__3 | Sharing experiences | 4 | pa_contripo__4 | Facilitate communication between the health care team and the patient being accompanied. | 5 | pa_contripo__5 | Helping to bring the patient's perspective to the health care team | 6 | pa_contripo__6 | Improving understanding of information shared between patient and health care team | 7 | pa_contripo__7 | Helping to remember information | 8 | pa_contripo__8 | Preparing the patient for medical appointments | 9 | pa_contripo__9 | Accompanying patients to medical appointments | 10 | pa_contripo__10 | Helping the patient participate in decision making | 11 | pa_contripo__11 | Bringing a new perspective to decision making | 12 | pa_contripo__12 | Referring patients to a variety of resources | 13 | pa_contripo__13 | Help develop a trusting relationship between the patient and the health care team | 14 | pa_contripo__14 | Helping the patient become a partner in his or her own care | 15 | pa_contripo__15 | Listening to the patient | 16 | pa_contripo__16 | Other contribution | 17 | pa_contripo__17 | No, the patient advisor has no particular contribution to make to the care trajectory. |
| 1                                                                                                                                                                            | pa_contripo__1                                                                                 | Giving information                                                                                                                                                                                                                         |                                                                                                                                                                                                                                                                                                                                                                                                                                                                                                                                                                                                                                                                                                                                                                                                                                                                                                                                                                                                                                                                                                                                                                                                                                                                                                                                                                                                                                                                                                                                                                                                                                                                                                                                                                                                                                                             |   |                |                    |                                       |                |                                |   |                |                     |   |                |                                                                                          |   |                |                                                                    |   |                |                                                                                    |   |                |                                 |   |                |                                                |   |                |                                               |    |                 |                                                    |    |                 |                                               |    |                 |                                              |    |                 |                                                                                   |    |                 |                                                             |    |                 |                          |    |                 |                    |    |                 |                                                                                        |
| 2                                                                                                                                                                            | pa_contripo__2                                                                                 | Giving support                                                                                                                                                                                                                             |                                                                                                                                                                                                                                                                                                                                                                                                                                                                                                                                                                                                                                                                                                                                                                                                                                                                                                                                                                                                                                                                                                                                                                                                                                                                                                                                                                                                                                                                                                                                                                                                                                                                                                                                                                                                                                                             |   |                |                    |                                       |                |                                |   |                |                     |   |                |                                                                                          |   |                |                                                                    |   |                |                                                                                    |   |                |                                 |   |                |                                                |   |                |                                               |    |                 |                                                    |    |                 |                                               |    |                 |                                              |    |                 |                                                                                   |    |                 |                                                             |    |                 |                          |    |                 |                    |    |                 |                                                                                        |
| 3                                                                                                                                                                            | pa_contripo__3                                                                                 | Sharing experiences                                                                                                                                                                                                                        |                                                                                                                                                                                                                                                                                                                                                                                                                                                                                                                                                                                                                                                                                                                                                                                                                                                                                                                                                                                                                                                                                                                                                                                                                                                                                                                                                                                                                                                                                                                                                                                                                                                                                                                                                                                                                                                             |   |                |                    |                                       |                |                                |   |                |                     |   |                |                                                                                          |   |                |                                                                    |   |                |                                                                                    |   |                |                                 |   |                |                                                |   |                |                                               |    |                 |                                                    |    |                 |                                               |    |                 |                                              |    |                 |                                                                                   |    |                 |                                                             |    |                 |                          |    |                 |                    |    |                 |                                                                                        |
| 4                                                                                                                                                                            | pa_contripo__4                                                                                 | Facilitate communication between the health care team and the patient being accompanied.                                                                                                                                                   |                                                                                                                                                                                                                                                                                                                                                                                                                                                                                                                                                                                                                                                                                                                                                                                                                                                                                                                                                                                                                                                                                                                                                                                                                                                                                                                                                                                                                                                                                                                                                                                                                                                                                                                                                                                                                                                             |   |                |                    |                                       |                |                                |   |                |                     |   |                |                                                                                          |   |                |                                                                    |   |                |                                                                                    |   |                |                                 |   |                |                                                |   |                |                                               |    |                 |                                                    |    |                 |                                               |    |                 |                                              |    |                 |                                                                                   |    |                 |                                                             |    |                 |                          |    |                 |                    |    |                 |                                                                                        |
| 5                                                                                                                                                                            | pa_contripo__5                                                                                 | Helping to bring the patient's perspective to the health care team                                                                                                                                                                         |                                                                                                                                                                                                                                                                                                                                                                                                                                                                                                                                                                                                                                                                                                                                                                                                                                                                                                                                                                                                                                                                                                                                                                                                                                                                                                                                                                                                                                                                                                                                                                                                                                                                                                                                                                                                                                                             |   |                |                    |                                       |                |                                |   |                |                     |   |                |                                                                                          |   |                |                                                                    |   |                |                                                                                    |   |                |                                 |   |                |                                                |   |                |                                               |    |                 |                                                    |    |                 |                                               |    |                 |                                              |    |                 |                                                                                   |    |                 |                                                             |    |                 |                          |    |                 |                    |    |                 |                                                                                        |
| 6                                                                                                                                                                            | pa_contripo__6                                                                                 | Improving understanding of information shared between patient and health care team                                                                                                                                                         |                                                                                                                                                                                                                                                                                                                                                                                                                                                                                                                                                                                                                                                                                                                                                                                                                                                                                                                                                                                                                                                                                                                                                                                                                                                                                                                                                                                                                                                                                                                                                                                                                                                                                                                                                                                                                                                             |   |                |                    |                                       |                |                                |   |                |                     |   |                |                                                                                          |   |                |                                                                    |   |                |                                                                                    |   |                |                                 |   |                |                                                |   |                |                                               |    |                 |                                                    |    |                 |                                               |    |                 |                                              |    |                 |                                                                                   |    |                 |                                                             |    |                 |                          |    |                 |                    |    |                 |                                                                                        |
| 7                                                                                                                                                                            | pa_contripo__7                                                                                 | Helping to remember information                                                                                                                                                                                                            |                                                                                                                                                                                                                                                                                                                                                                                                                                                                                                                                                                                                                                                                                                                                                                                                                                                                                                                                                                                                                                                                                                                                                                                                                                                                                                                                                                                                                                                                                                                                                                                                                                                                                                                                                                                                                                                             |   |                |                    |                                       |                |                                |   |                |                     |   |                |                                                                                          |   |                |                                                                    |   |                |                                                                                    |   |                |                                 |   |                |                                                |   |                |                                               |    |                 |                                                    |    |                 |                                               |    |                 |                                              |    |                 |                                                                                   |    |                 |                                                             |    |                 |                          |    |                 |                    |    |                 |                                                                                        |
| 8                                                                                                                                                                            | pa_contripo__8                                                                                 | Preparing the patient for medical appointments                                                                                                                                                                                             |                                                                                                                                                                                                                                                                                                                                                                                                                                                                                                                                                                                                                                                                                                                                                                                                                                                                                                                                                                                                                                                                                                                                                                                                                                                                                                                                                                                                                                                                                                                                                                                                                                                                                                                                                                                                                                                             |   |                |                    |                                       |                |                                |   |                |                     |   |                |                                                                                          |   |                |                                                                    |   |                |                                                                                    |   |                |                                 |   |                |                                                |   |                |                                               |    |                 |                                                    |    |                 |                                               |    |                 |                                              |    |                 |                                                                                   |    |                 |                                                             |    |                 |                          |    |                 |                    |    |                 |                                                                                        |
| 9                                                                                                                                                                            | pa_contripo__9                                                                                 | Accompanying patients to medical appointments                                                                                                                                                                                              |                                                                                                                                                                                                                                                                                                                                                                                                                                                                                                                                                                                                                                                                                                                                                                                                                                                                                                                                                                                                                                                                                                                                                                                                                                                                                                                                                                                                                                                                                                                                                                                                                                                                                                                                                                                                                                                             |   |                |                    |                                       |                |                                |   |                |                     |   |                |                                                                                          |   |                |                                                                    |   |                |                                                                                    |   |                |                                 |   |                |                                                |   |                |                                               |    |                 |                                                    |    |                 |                                               |    |                 |                                              |    |                 |                                                                                   |    |                 |                                                             |    |                 |                          |    |                 |                    |    |                 |                                                                                        |
| 10                                                                                                                                                                           | pa_contripo__10                                                                                | Helping the patient participate in decision making                                                                                                                                                                                         |                                                                                                                                                                                                                                                                                                                                                                                                                                                                                                                                                                                                                                                                                                                                                                                                                                                                                                                                                                                                                                                                                                                                                                                                                                                                                                                                                                                                                                                                                                                                                                                                                                                                                                                                                                                                                                                             |   |                |                    |                                       |                |                                |   |                |                     |   |                |                                                                                          |   |                |                                                                    |   |                |                                                                                    |   |                |                                 |   |                |                                                |   |                |                                               |    |                 |                                                    |    |                 |                                               |    |                 |                                              |    |                 |                                                                                   |    |                 |                                                             |    |                 |                          |    |                 |                    |    |                 |                                                                                        |
| 11                                                                                                                                                                           | pa_contripo__11                                                                                | Bringing a new perspective to decision making                                                                                                                                                                                              |                                                                                                                                                                                                                                                                                                                                                                                                                                                                                                                                                                                                                                                                                                                                                                                                                                                                                                                                                                                                                                                                                                                                                                                                                                                                                                                                                                                                                                                                                                                                                                                                                                                                                                                                                                                                                                                             |   |                |                    |                                       |                |                                |   |                |                     |   |                |                                                                                          |   |                |                                                                    |   |                |                                                                                    |   |                |                                 |   |                |                                                |   |                |                                               |    |                 |                                                    |    |                 |                                               |    |                 |                                              |    |                 |                                                                                   |    |                 |                                                             |    |                 |                          |    |                 |                    |    |                 |                                                                                        |
| 12                                                                                                                                                                           | pa_contripo__12                                                                                | Referring patients to a variety of resources                                                                                                                                                                                               |                                                                                                                                                                                                                                                                                                                                                                                                                                                                                                                                                                                                                                                                                                                                                                                                                                                                                                                                                                                                                                                                                                                                                                                                                                                                                                                                                                                                                                                                                                                                                                                                                                                                                                                                                                                                                                                             |   |                |                    |                                       |                |                                |   |                |                     |   |                |                                                                                          |   |                |                                                                    |   |                |                                                                                    |   |                |                                 |   |                |                                                |   |                |                                               |    |                 |                                                    |    |                 |                                               |    |                 |                                              |    |                 |                                                                                   |    |                 |                                                             |    |                 |                          |    |                 |                    |    |                 |                                                                                        |
| 13                                                                                                                                                                           | pa_contripo__13                                                                                | Help develop a trusting relationship between the patient and the health care team                                                                                                                                                          |                                                                                                                                                                                                                                                                                                                                                                                                                                                                                                                                                                                                                                                                                                                                                                                                                                                                                                                                                                                                                                                                                                                                                                                                                                                                                                                                                                                                                                                                                                                                                                                                                                                                                                                                                                                                                                                             |   |                |                    |                                       |                |                                |   |                |                     |   |                |                                                                                          |   |                |                                                                    |   |                |                                                                                    |   |                |                                 |   |                |                                                |   |                |                                               |    |                 |                                                    |    |                 |                                               |    |                 |                                              |    |                 |                                                                                   |    |                 |                                                             |    |                 |                          |    |                 |                    |    |                 |                                                                                        |
| 14                                                                                                                                                                           | pa_contripo__14                                                                                | Helping the patient become a partner in his or her own care                                                                                                                                                                                |                                                                                                                                                                                                                                                                                                                                                                                                                                                                                                                                                                                                                                                                                                                                                                                                                                                                                                                                                                                                                                                                                                                                                                                                                                                                                                                                                                                                                                                                                                                                                                                                                                                                                                                                                                                                                                                             |   |                |                    |                                       |                |                                |   |                |                     |   |                |                                                                                          |   |                |                                                                    |   |                |                                                                                    |   |                |                                 |   |                |                                                |   |                |                                               |    |                 |                                                    |    |                 |                                               |    |                 |                                              |    |                 |                                                                                   |    |                 |                                                             |    |                 |                          |    |                 |                    |    |                 |                                                                                        |
| 15                                                                                                                                                                           | pa_contripo__15                                                                                | Listening to the patient                                                                                                                                                                                                                   |                                                                                                                                                                                                                                                                                                                                                                                                                                                                                                                                                                                                                                                                                                                                                                                                                                                                                                                                                                                                                                                                                                                                                                                                                                                                                                                                                                                                                                                                                                                                                                                                                                                                                                                                                                                                                                                             |   |                |                    |                                       |                |                                |   |                |                     |   |                |                                                                                          |   |                |                                                                    |   |                |                                                                                    |   |                |                                 |   |                |                                                |   |                |                                               |    |                 |                                                    |    |                 |                                               |    |                 |                                              |    |                 |                                                                                   |    |                 |                                                             |    |                 |                          |    |                 |                    |    |                 |                                                                                        |
| 16                                                                                                                                                                           | pa_contripo__16                                                                                | Other contribution                                                                                                                                                                                                                         |                                                                                                                                                                                                                                                                                                                                                                                                                                                                                                                                                                                                                                                                                                                                                                                                                                                                                                                                                                                                                                                                                                                                                                                                                                                                                                                                                                                                                                                                                                                                                                                                                                                                                                                                                                                                                                                             |   |                |                    |                                       |                |                                |   |                |                     |   |                |                                                                                          |   |                |                                                                    |   |                |                                                                                    |   |                |                                 |   |                |                                                |   |                |                                               |    |                 |                                                    |    |                 |                                               |    |                 |                                              |    |                 |                                                                                   |    |                 |                                                             |    |                 |                          |    |                 |                    |    |                 |                                                                                        |
| 17                                                                                                                                                                           | pa_contripo__17                                                                                | No, the patient advisor has no particular contribution to make to the care trajectory.                                                                                                                                                     |                                                                                                                                                                                                                                                                                                                                                                                                                                                                                                                                                                                                                                                                                                                                                                                                                                                                                                                                                                                                                                                                                                                                                                                                                                                                                                                                                                                                                                                                                                                                                                                                                                                                                                                                                                                                                                                             |   |                |                    |                                       |                |                                |   |                |                     |   |                |                                                                                          |   |                |                                                                    |   |                |                                                                                    |   |                |                                 |   |                |                                                |   |                |                                               |    |                 |                                                    |    |                 |                                               |    |                 |                                              |    |                 |                                                                                   |    |                 |                                                             |    |                 |                          |    |                 |                    |    |                 |                                                                                        |
| 100                                                                                                                                                                          | pa_ppacontripoautre_v2_v2<br>Afficher le champ UNIQUEMENT si :<br>[pa_contripo(16)] = '1'      | Please indicate what other contribution the patient advisor could make.                                                                                                                                                                    | text<br>Alignement personnalisé : LV                                                                                                                                                                                                                                                                                                                                                                                                                                                                                                                                                                                                                                                                                                                                                                                                                                                                                                                                                                                                                                                                                                                                                                                                                                                                                                                                                                                                                                                                                                                                                                                                                                                                                                                                                                                                                        |   |                |                    |                                       |                |                                |   |                |                     |   |                |                                                                                          |   |                |                                                                    |   |                |                                                                                    |   |                |                                 |   |                |                                                |   |                |                                               |    |                 |                                                    |    |                 |                                               |    |                 |                                              |    |                 |                                                                                   |    |                 |                                                             |    |                 |                          |    |                 |                    |    |                 |                                                                                        |
| 101                                                                                                                                                                          | patients_experience_with_pas_questionnaire_complete                                            | En-tête de section : <i>Form Status</i><br>Complete?                                                                                                                                                                                       | dropdown<br><table border="1"> <tr><td>0</td><td>Incomplete</td></tr> <tr><td>1</td><td>Unverified</td></tr> <tr><td>2</td><td>Complete</td></tr> </table>                                                                                                                                                                                                                                                                                                                                                                                                                                                                                                                                                                                                                                                                                                                                                                                                                                                                                                                                                                                                                                                                                                                                                                                                                                                                                                                                                                                                                                                                                                                                                                                                                                                                                                  | 0 | Incomplete     | 1                  | Unverified                            | 2              | Complete                       |   |                |                     |   |                |                                                                                          |   |                |                                                                    |   |                |                                                                                    |   |                |                                 |   |                |                                                |   |                |                                               |    |                 |                                                    |    |                 |                                               |    |                 |                                              |    |                 |                                                                                   |    |                 |                                                             |    |                 |                          |    |                 |                    |    |                 |                                                                                        |
| 0                                                                                                                                                                            | Incomplete                                                                                     |                                                                                                                                                                                                                                            |                                                                                                                                                                                                                                                                                                                                                                                                                                                                                                                                                                                                                                                                                                                                                                                                                                                                                                                                                                                                                                                                                                                                                                                                                                                                                                                                                                                                                                                                                                                                                                                                                                                                                                                                                                                                                                                             |   |                |                    |                                       |                |                                |   |                |                     |   |                |                                                                                          |   |                |                                                                    |   |                |                                                                                    |   |                |                                 |   |                |                                                |   |                |                                               |    |                 |                                                    |    |                 |                                               |    |                 |                                              |    |                 |                                                                                   |    |                 |                                                             |    |                 |                          |    |                 |                    |    |                 |                                                                                        |
| 1                                                                                                                                                                            | Unverified                                                                                     |                                                                                                                                                                                                                                            |                                                                                                                                                                                                                                                                                                                                                                                                                                                                                                                                                                                                                                                                                                                                                                                                                                                                                                                                                                                                                                                                                                                                                                                                                                                                                                                                                                                                                                                                                                                                                                                                                                                                                                                                                                                                                                                             |   |                |                    |                                       |                |                                |   |                |                     |   |                |                                                                                          |   |                |                                                                    |   |                |                                                                                    |   |                |                                 |   |                |                                                |   |                |                                               |    |                 |                                                    |    |                 |                                               |    |                 |                                              |    |                 |                                                                                   |    |                 |                                                             |    |                 |                          |    |                 |                    |    |                 |                                                                                        |
| 2                                                                                                                                                                            | Complete                                                                                       |                                                                                                                                                                                                                                            |                                                                                                                                                                                                                                                                                                                                                                                                                                                                                                                                                                                                                                                                                                                                                                                                                                                                                                                                                                                                                                                                                                                                                                                                                                                                                                                                                                                                                                                                                                                                                                                                                                                                                                                                                                                                                                                             |   |                |                    |                                       |                |                                |   |                |                     |   |                |                                                                                          |   |                |                                                                    |   |                |                                                                                    |   |                |                                 |   |                |                                                |   |                |                                               |    |                 |                                                    |    |                 |                                               |    |                 |                                              |    |                 |                                                                                   |    |                 |                                                             |    |                 |                          |    |                 |                    |    |                 |                                                                                        |
| Formulaire : <b>Patient's experience with PAs questionnaire-T2</b> (patients_experience_with_pas_questionnaire2) <span style="float: right;"><a href="#">Collapse</a></span> |                                                                                                |                                                                                                                                                                                                                                            |                                                                                                                                                                                                                                                                                                                                                                                                                                                                                                                                                                                                                                                                                                                                                                                                                                                                                                                                                                                                                                                                                                                                                                                                                                                                                                                                                                                                                                                                                                                                                                                                                                                                                                                                                                                                                                                             |   |                |                    |                                       |                |                                |   |                |                     |   |                |                                                                                          |   |                |                                                                    |   |                |                                                                                    |   |                |                                 |   |                |                                                |   |                |                                               |    |                 |                                                    |    |                 |                                               |    |                 |                                              |    |                 |                                                                                   |    |                 |                                                             |    |                 |                          |    |                 |                    |    |                 |                                                                                        |
| 102                                                                                                                                                                          | pa_jumelage_v2                                                                                 | Have you ever been accompanied by someone (this may be one or more meetings) who has had the same experience as you (cancer, surgery or genetic testing experience)? In health care settings, these people are called "patients advisors". | radio<br><table border="1"> <tr><td>0</td><td>Yes</td></tr> <tr><td>1</td><td>Not yet but I wish to benefit from it</td></tr> <tr><td>2</td><td>No and I don't think I need it</td></tr> </table><br>Alignement personnalisé : LV                                                                                                                                                                                                                                                                                                                                                                                                                                                                                                                                                                                                                                                                                                                                                                                                                                                                                                                                                                                                                                                                                                                                                                                                                                                                                                                                                                                                                                                                                                                                                                                                                           | 0 | Yes            | 1                  | Not yet but I wish to benefit from it | 2              | No and I don't think I need it |   |                |                     |   |                |                                                                                          |   |                |                                                                    |   |                |                                                                                    |   |                |                                 |   |                |                                                |   |                |                                               |    |                 |                                                    |    |                 |                                               |    |                 |                                              |    |                 |                                                                                   |    |                 |                                                             |    |                 |                          |    |                 |                    |    |                 |                                                                                        |
| 0                                                                                                                                                                            | Yes                                                                                            |                                                                                                                                                                                                                                            |                                                                                                                                                                                                                                                                                                                                                                                                                                                                                                                                                                                                                                                                                                                                                                                                                                                                                                                                                                                                                                                                                                                                                                                                                                                                                                                                                                                                                                                                                                                                                                                                                                                                                                                                                                                                                                                             |   |                |                    |                                       |                |                                |   |                |                     |   |                |                                                                                          |   |                |                                                                    |   |                |                                                                                    |   |                |                                 |   |                |                                                |   |                |                                               |    |                 |                                                    |    |                 |                                               |    |                 |                                              |    |                 |                                                                                   |    |                 |                                                             |    |                 |                          |    |                 |                    |    |                 |                                                                                        |
| 1                                                                                                                                                                            | Not yet but I wish to benefit from it                                                          |                                                                                                                                                                                                                                            |                                                                                                                                                                                                                                                                                                                                                                                                                                                                                                                                                                                                                                                                                                                                                                                                                                                                                                                                                                                                                                                                                                                                                                                                                                                                                                                                                                                                                                                                                                                                                                                                                                                                                                                                                                                                                                                             |   |                |                    |                                       |                |                                |   |                |                     |   |                |                                                                                          |   |                |                                                                    |   |                |                                                                                    |   |                |                                 |   |                |                                                |   |                |                                               |    |                 |                                                    |    |                 |                                               |    |                 |                                              |    |                 |                                                                                   |    |                 |                                                             |    |                 |                          |    |                 |                    |    |                 |                                                                                        |
| 2                                                                                                                                                                            | No and I don't think I need it                                                                 |                                                                                                                                                                                                                                            |                                                                                                                                                                                                                                                                                                                                                                                                                                                                                                                                                                                                                                                                                                                                                                                                                                                                                                                                                                                                                                                                                                                                                                                                                                                                                                                                                                                                                                                                                                                                                                                                                                                                                                                                                                                                                                                             |   |                |                    |                                       |                |                                |   |                |                     |   |                |                                                                                          |   |                |                                                                    |   |                |                                                                                    |   |                |                                 |   |                |                                                |   |                |                                               |    |                 |                                                    |    |                 |                                               |    |                 |                                              |    |                 |                                                                                   |    |                 |                                                             |    |                 |                          |    |                 |                    |    |                 |                                                                                        |
| 103                                                                                                                                                                          | pa_nbrc_renc<br>Afficher le champ UNIQUEMENT si :<br>[pa_jumelage_v2] = '0'                    | How many meetings have you had with a patient advisor?                                                                                                                                                                                     | radio<br><table border="1"> <tr><td>1</td><td>Only one</td></tr> <tr><td>2</td><td>Several</td></tr> </table>                                                                                                                                                                                                                                                                                                                                                                                                                                                                                                                                                                                                                                                                                                                                                                                                                                                                                                                                                                                                                                                                                                                                                                                                                                                                                                                                                                                                                                                                                                                                                                                                                                                                                                                                               | 1 | Only one       | 2                  | Several                               |                |                                |   |                |                     |   |                |                                                                                          |   |                |                                                                    |   |                |                                                                                    |   |                |                                 |   |                |                                                |   |                |                                               |    |                 |                                                    |    |                 |                                               |    |                 |                                              |    |                 |                                                                                   |    |                 |                                                             |    |                 |                          |    |                 |                    |    |                 |                                                                                        |
| 1                                                                                                                                                                            | Only one                                                                                       |                                                                                                                                                                                                                                            |                                                                                                                                                                                                                                                                                                                                                                                                                                                                                                                                                                                                                                                                                                                                                                                                                                                                                                                                                                                                                                                                                                                                                                                                                                                                                                                                                                                                                                                                                                                                                                                                                                                                                                                                                                                                                                                             |   |                |                    |                                       |                |                                |   |                |                     |   |                |                                                                                          |   |                |                                                                    |   |                |                                                                                    |   |                |                                 |   |                |                                                |   |                |                                               |    |                 |                                                    |    |                 |                                               |    |                 |                                              |    |                 |                                                                                   |    |                 |                                                             |    |                 |                          |    |                 |                    |    |                 |                                                                                        |
| 2                                                                                                                                                                            | Several                                                                                        |                                                                                                                                                                                                                                            |                                                                                                                                                                                                                                                                                                                                                                                                                                                                                                                                                                                                                                                                                                                                                                                                                                                                                                                                                                                                                                                                                                                                                                                                                                                                                                                                                                                                                                                                                                                                                                                                                                                                                                                                                                                                                                                             |   |                |                    |                                       |                |                                |   |                |                     |   |                |                                                                                          |   |                |                                                                    |   |                |                                                                                    |   |                |                                 |   |                |                                                |   |                |                                               |    |                 |                                                    |    |                 |                                               |    |                 |                                              |    |                 |                                                                                   |    |                 |                                                             |    |                 |                          |    |                 |                    |    |                 |                                                                                        |

|     |                                                                                                                                         |                                                                                                                                                                            |                                                                                                                                                                                                                                                                                                                                                                                                                                                                                                                                                                                                                                                                                                                                                                                                                                                                                                                                                                                                               |   |                   |                                   |   |                   |                                                 |   |                   |                                                 |   |                   |                     |   |                   |                                                                  |   |                   |                                              |   |                   |                                                              |   |                   |                                  |   |                   |                   |
|-----|-----------------------------------------------------------------------------------------------------------------------------------------|----------------------------------------------------------------------------------------------------------------------------------------------------------------------------|---------------------------------------------------------------------------------------------------------------------------------------------------------------------------------------------------------------------------------------------------------------------------------------------------------------------------------------------------------------------------------------------------------------------------------------------------------------------------------------------------------------------------------------------------------------------------------------------------------------------------------------------------------------------------------------------------------------------------------------------------------------------------------------------------------------------------------------------------------------------------------------------------------------------------------------------------------------------------------------------------------------|---|-------------------|-----------------------------------|---|-------------------|-------------------------------------------------|---|-------------------|-------------------------------------------------|---|-------------------|---------------------|---|-------------------|------------------------------------------------------------------|---|-------------------|----------------------------------------------|---|-------------------|--------------------------------------------------------------|---|-------------------|----------------------------------|---|-------------------|-------------------|
| 104 | <p>bidon_65</p> <p>Afficher le champ UNIQUEMENT si :<br/>[pa_nombre_renc] = '1' or [pa_jumelage_v2] = '1' or [pa_jumelage_v2] = '2'</p> | <p>Since you have had only one meeting with a patient advisor or have not yet met one, you do not have to answer this questionnaire. Thank you for your participation.</p> | descriptive                                                                                                                                                                                                                                                                                                                                                                                                                                                                                                                                                                                                                                                                                                                                                                                                                                                                                                                                                                                                   |   |                   |                                   |   |                   |                                                 |   |                   |                                                 |   |                   |                     |   |                   |                                                                  |   |                   |                                              |   |                   |                                                              |   |                   |                                  |   |                   |                   |
| 105 | <p>bidon_66</p> <p>Afficher le champ UNIQUEMENT si :<br/>[pa_jumelage_v2] = '0' and [pa_nombre_renc] = '2'</p>                          | <p>The following questions focus on your evaluation of the second (and subsequent if applicable) meeting with a patient advisor.</p>                                       | descriptive                                                                                                                                                                                                                                                                                                                                                                                                                                                                                                                                                                                                                                                                                                                                                                                                                                                                                                                                                                                                   |   |                   |                                   |   |                   |                                                 |   |                   |                                                 |   |                   |                     |   |                   |                                                                  |   |                   |                                              |   |                   |                                                              |   |                   |                                  |   |                   |                   |
| 106 | <p>pa_bidon2_v2_v2_v2</p> <p>Afficher le champ UNIQUEMENT si :<br/>[pa_jumelage_v2] = '0' and [pa_nombre_renc] = '2'</p>                | <p>What topics did you discuss with the patient advisor?<br/>(Check all that apply)</p>                                                                                    | descriptive                                                                                                                                                                                                                                                                                                                                                                                                                                                                                                                                                                                                                                                                                                                                                                                                                                                                                                                                                                                                   |   |                   |                                   |   |                   |                                                 |   |                   |                                                 |   |                   |                     |   |                   |                                                                  |   |                   |                                              |   |                   |                                                              |   |                   |                                  |   |                   |                   |
| 107 | <p>pa_themeorg_v2</p> <p>Afficher le champ UNIQUEMENT si :<br/>[pa_jumelage_v2] = '0' and [pa_nombre_renc] = '2'</p>                    | <p>Organizational aspects</p>                                                                                                                                              | <p>checkbox</p> <table border="1"> <tr> <td>0</td> <td>pa_themeorg_v2__0</td> <td>Her/His role as a patient advisor</td> </tr> <tr> <td>1</td> <td>pa_themeorg_v2__1</td> <td>The role of different health care professionals</td> </tr> <tr> <td>2</td> <td>pa_themeorg_v2__2</td> <td>The role of external and internal organizations</td> </tr> <tr> <td>3</td> <td>pa_themeorg_v2__3</td> <td>The care trajectory</td> </tr> <tr> <td>4</td> <td>pa_themeorg_v2__4</td> <td>Rights as a patient (e.g., refusing treatment, asking questions)</td> </tr> <tr> <td>5</td> <td>pa_themeorg_v2__5</td> <td>Where and how to get to medical appointments</td> </tr> <tr> <td>6</td> <td>pa_themeorg_v2__6</td> <td>Financial support for patients and transportation assistance</td> </tr> <tr> <td>7</td> <td>pa_themeorg_v2__7</td> <td>The Parole-Onco Research Project</td> </tr> <tr> <td>8</td> <td>pa_themeorg_v2__8</td> <td>Other information</td> </tr> </table> <p>Alignement personnalisé : LV</p> | 0 | pa_themeorg_v2__0 | Her/His role as a patient advisor | 1 | pa_themeorg_v2__1 | The role of different health care professionals | 2 | pa_themeorg_v2__2 | The role of external and internal organizations | 3 | pa_themeorg_v2__3 | The care trajectory | 4 | pa_themeorg_v2__4 | Rights as a patient (e.g., refusing treatment, asking questions) | 5 | pa_themeorg_v2__5 | Where and how to get to medical appointments | 6 | pa_themeorg_v2__6 | Financial support for patients and transportation assistance | 7 | pa_themeorg_v2__7 | The Parole-Onco Research Project | 8 | pa_themeorg_v2__8 | Other information |
| 0   | pa_themeorg_v2__0                                                                                                                       | Her/His role as a patient advisor                                                                                                                                          |                                                                                                                                                                                                                                                                                                                                                                                                                                                                                                                                                                                                                                                                                                                                                                                                                                                                                                                                                                                                               |   |                   |                                   |   |                   |                                                 |   |                   |                                                 |   |                   |                     |   |                   |                                                                  |   |                   |                                              |   |                   |                                                              |   |                   |                                  |   |                   |                   |
| 1   | pa_themeorg_v2__1                                                                                                                       | The role of different health care professionals                                                                                                                            |                                                                                                                                                                                                                                                                                                                                                                                                                                                                                                                                                                                                                                                                                                                                                                                                                                                                                                                                                                                                               |   |                   |                                   |   |                   |                                                 |   |                   |                                                 |   |                   |                     |   |                   |                                                                  |   |                   |                                              |   |                   |                                                              |   |                   |                                  |   |                   |                   |
| 2   | pa_themeorg_v2__2                                                                                                                       | The role of external and internal organizations                                                                                                                            |                                                                                                                                                                                                                                                                                                                                                                                                                                                                                                                                                                                                                                                                                                                                                                                                                                                                                                                                                                                                               |   |                   |                                   |   |                   |                                                 |   |                   |                                                 |   |                   |                     |   |                   |                                                                  |   |                   |                                              |   |                   |                                                              |   |                   |                                  |   |                   |                   |
| 3   | pa_themeorg_v2__3                                                                                                                       | The care trajectory                                                                                                                                                        |                                                                                                                                                                                                                                                                                                                                                                                                                                                                                                                                                                                                                                                                                                                                                                                                                                                                                                                                                                                                               |   |                   |                                   |   |                   |                                                 |   |                   |                                                 |   |                   |                     |   |                   |                                                                  |   |                   |                                              |   |                   |                                                              |   |                   |                                  |   |                   |                   |
| 4   | pa_themeorg_v2__4                                                                                                                       | Rights as a patient (e.g., refusing treatment, asking questions)                                                                                                           |                                                                                                                                                                                                                                                                                                                                                                                                                                                                                                                                                                                                                                                                                                                                                                                                                                                                                                                                                                                                               |   |                   |                                   |   |                   |                                                 |   |                   |                                                 |   |                   |                     |   |                   |                                                                  |   |                   |                                              |   |                   |                                                              |   |                   |                                  |   |                   |                   |
| 5   | pa_themeorg_v2__5                                                                                                                       | Where and how to get to medical appointments                                                                                                                               |                                                                                                                                                                                                                                                                                                                                                                                                                                                                                                                                                                                                                                                                                                                                                                                                                                                                                                                                                                                                               |   |                   |                                   |   |                   |                                                 |   |                   |                                                 |   |                   |                     |   |                   |                                                                  |   |                   |                                              |   |                   |                                                              |   |                   |                                  |   |                   |                   |
| 6   | pa_themeorg_v2__6                                                                                                                       | Financial support for patients and transportation assistance                                                                                                               |                                                                                                                                                                                                                                                                                                                                                                                                                                                                                                                                                                                                                                                                                                                                                                                                                                                                                                                                                                                                               |   |                   |                                   |   |                   |                                                 |   |                   |                                                 |   |                   |                     |   |                   |                                                                  |   |                   |                                              |   |                   |                                                              |   |                   |                                  |   |                   |                   |
| 7   | pa_themeorg_v2__7                                                                                                                       | The Parole-Onco Research Project                                                                                                                                           |                                                                                                                                                                                                                                                                                                                                                                                                                                                                                                                                                                                                                                                                                                                                                                                                                                                                                                                                                                                                               |   |                   |                                   |   |                   |                                                 |   |                   |                                                 |   |                   |                     |   |                   |                                                                  |   |                   |                                              |   |                   |                                                              |   |                   |                                  |   |                   |                   |
| 8   | pa_themeorg_v2__8                                                                                                                       | Other information                                                                                                                                                          |                                                                                                                                                                                                                                                                                                                                                                                                                                                                                                                                                                                                                                                                                                                                                                                                                                                                                                                                                                                                               |   |                   |                                   |   |                   |                                                 |   |                   |                                                 |   |                   |                     |   |                   |                                                                  |   |                   |                                              |   |                   |                                                              |   |                   |                                  |   |                   |                   |
| 108 | <p>pa_asp_org_autre_v2</p> <p>Afficher le champ UNIQUEMENT si :<br/>[pa_themeorg_v2(8)] = '1'</p>                                       | <p>If other information, please specify which one:</p>                                                                                                                     | <p>text</p> <p>Alignement personnalisé : LV</p>                                                                                                                                                                                                                                                                                                                                                                                                                                                                                                                                                                                                                                                                                                                                                                                                                                                                                                                                                               |   |                   |                                   |   |                   |                                                 |   |                   |                                                 |   |                   |                     |   |                   |                                                                  |   |                   |                                              |   |                   |                                                              |   |                   |                                  |   |                   |                   |

|     |                                                                                                                |                                                                                      |                                                                                                                                                                                                                                                                                                                                                                                                                                                                                                                                                                                                                                                                                                                                                                                                                                                                                                                                                                                                                                                                                                                                                                                                                                                                                                                                                                                                                                                                                                                                                                                                                                                                                                                                                                                                            |   |                   |                                                                                  |   |                   |        |   |                   |                 |   |                   |                                           |   |                   |                                                                                      |   |                   |                                                |   |                   |                 |   |                   |                 |   |                   |                     |   |                   |                                         |    |                    |                              |    |                    |                                     |    |                    |                                   |    |                    |                   |    |                    |                               |    |                    |                                               |    |                    |                           |    |                    |                   |
|-----|----------------------------------------------------------------------------------------------------------------|--------------------------------------------------------------------------------------|------------------------------------------------------------------------------------------------------------------------------------------------------------------------------------------------------------------------------------------------------------------------------------------------------------------------------------------------------------------------------------------------------------------------------------------------------------------------------------------------------------------------------------------------------------------------------------------------------------------------------------------------------------------------------------------------------------------------------------------------------------------------------------------------------------------------------------------------------------------------------------------------------------------------------------------------------------------------------------------------------------------------------------------------------------------------------------------------------------------------------------------------------------------------------------------------------------------------------------------------------------------------------------------------------------------------------------------------------------------------------------------------------------------------------------------------------------------------------------------------------------------------------------------------------------------------------------------------------------------------------------------------------------------------------------------------------------------------------------------------------------------------------------------------------------|---|-------------------|----------------------------------------------------------------------------------|---|-------------------|--------|---|-------------------|-----------------|---|-------------------|-------------------------------------------|---|-------------------|--------------------------------------------------------------------------------------|---|-------------------|------------------------------------------------|---|-------------------|-----------------|---|-------------------|-----------------|---|-------------------|---------------------|---|-------------------|-----------------------------------------|----|--------------------|------------------------------|----|--------------------|-------------------------------------|----|--------------------|-----------------------------------|----|--------------------|-------------------|----|--------------------|-------------------------------|----|--------------------|-----------------------------------------------|----|--------------------|---------------------------|----|--------------------|-------------------|
| 109 | pa_themecli_v2<br>Afficher le champ UNIQUEM<br>ENT si :<br>[pa_jumelage_v2] = '0' and [p<br>a_nbre_renc] = '2' | Clinical aspects                                                                     | checkbox<br><table border="1"> <tr> <td>0</td> <td>pa_themecli_v2__0</td> <td>The announcement of the cancer diagnosis or genetic predisposition by the doctor</td> </tr> <tr> <td>1</td> <td>pa_themecli_v2__1</td> <td>Cancer</td> </tr> <tr> <td>2</td> <td>pa_themecli_v2__2</td> <td>Genetic testing</td> </tr> <tr> <td>3</td> <td>pa_themecli_v2__3</td> <td>Therapeutic options in the case of cancer</td> </tr> <tr> <td>4</td> <td>pa_themecli_v2__4</td> <td>Ways to reduce risk in carriers of a gene mutation that increases the risk of cancer</td> </tr> <tr> <td>5</td> <td>pa_themecli_v2__5</td> <td>Surgical and reconstructive options for cancer</td> </tr> <tr> <td>6</td> <td>pa_themecli_v2__6</td> <td>Breast implants</td> </tr> <tr> <td>7</td> <td>pa_themecli_v2__7</td> <td>Hormonal issues</td> </tr> <tr> <td>8</td> <td>pa_themecli_v2__8</td> <td>Reproductive issues</td> </tr> <tr> <td>9</td> <td>pa_themecli_v2__9</td> <td>Urinary and erectile dysfunction issues</td> </tr> <tr> <td>10</td> <td>pa_themecli_v2__10</td> <td>Fatigue following treatments</td> </tr> <tr> <td>11</td> <td>pa_themecli_v2__11</td> <td>Pain and discomfort after treatment</td> </tr> <tr> <td>12</td> <td>pa_themecli_v2__12</td> <td>Pain and discomfort after surgery</td> </tr> <tr> <td>13</td> <td>pa_themecli_v2__13</td> <td>Possible emotions</td> </tr> <tr> <td>14</td> <td>pa_themecli_v2__14</td> <td>Stress and anxiety management</td> </tr> <tr> <td>15</td> <td>pa_themecli_v2__15</td> <td>Impact on physical appearance and self-esteem</td> </tr> <tr> <td>16</td> <td>pa_themecli_v2__16</td> <td>Decision-making processes</td> </tr> <tr> <td>17</td> <td>pa_themecli_v2__17</td> <td>Other information</td> </tr> </table><br>Alignement personnalisé : LV | 0 | pa_themecli_v2__0 | The announcement of the cancer diagnosis or genetic predisposition by the doctor | 1 | pa_themecli_v2__1 | Cancer | 2 | pa_themecli_v2__2 | Genetic testing | 3 | pa_themecli_v2__3 | Therapeutic options in the case of cancer | 4 | pa_themecli_v2__4 | Ways to reduce risk in carriers of a gene mutation that increases the risk of cancer | 5 | pa_themecli_v2__5 | Surgical and reconstructive options for cancer | 6 | pa_themecli_v2__6 | Breast implants | 7 | pa_themecli_v2__7 | Hormonal issues | 8 | pa_themecli_v2__8 | Reproductive issues | 9 | pa_themecli_v2__9 | Urinary and erectile dysfunction issues | 10 | pa_themecli_v2__10 | Fatigue following treatments | 11 | pa_themecli_v2__11 | Pain and discomfort after treatment | 12 | pa_themecli_v2__12 | Pain and discomfort after surgery | 13 | pa_themecli_v2__13 | Possible emotions | 14 | pa_themecli_v2__14 | Stress and anxiety management | 15 | pa_themecli_v2__15 | Impact on physical appearance and self-esteem | 16 | pa_themecli_v2__16 | Decision-making processes | 17 | pa_themecli_v2__17 | Other information |
| 0   | pa_themecli_v2__0                                                                                              | The announcement of the cancer diagnosis or genetic predisposition by the doctor     |                                                                                                                                                                                                                                                                                                                                                                                                                                                                                                                                                                                                                                                                                                                                                                                                                                                                                                                                                                                                                                                                                                                                                                                                                                                                                                                                                                                                                                                                                                                                                                                                                                                                                                                                                                                                            |   |                   |                                                                                  |   |                   |        |   |                   |                 |   |                   |                                           |   |                   |                                                                                      |   |                   |                                                |   |                   |                 |   |                   |                 |   |                   |                     |   |                   |                                         |    |                    |                              |    |                    |                                     |    |                    |                                   |    |                    |                   |    |                    |                               |    |                    |                                               |    |                    |                           |    |                    |                   |
| 1   | pa_themecli_v2__1                                                                                              | Cancer                                                                               |                                                                                                                                                                                                                                                                                                                                                                                                                                                                                                                                                                                                                                                                                                                                                                                                                                                                                                                                                                                                                                                                                                                                                                                                                                                                                                                                                                                                                                                                                                                                                                                                                                                                                                                                                                                                            |   |                   |                                                                                  |   |                   |        |   |                   |                 |   |                   |                                           |   |                   |                                                                                      |   |                   |                                                |   |                   |                 |   |                   |                 |   |                   |                     |   |                   |                                         |    |                    |                              |    |                    |                                     |    |                    |                                   |    |                    |                   |    |                    |                               |    |                    |                                               |    |                    |                           |    |                    |                   |
| 2   | pa_themecli_v2__2                                                                                              | Genetic testing                                                                      |                                                                                                                                                                                                                                                                                                                                                                                                                                                                                                                                                                                                                                                                                                                                                                                                                                                                                                                                                                                                                                                                                                                                                                                                                                                                                                                                                                                                                                                                                                                                                                                                                                                                                                                                                                                                            |   |                   |                                                                                  |   |                   |        |   |                   |                 |   |                   |                                           |   |                   |                                                                                      |   |                   |                                                |   |                   |                 |   |                   |                 |   |                   |                     |   |                   |                                         |    |                    |                              |    |                    |                                     |    |                    |                                   |    |                    |                   |    |                    |                               |    |                    |                                               |    |                    |                           |    |                    |                   |
| 3   | pa_themecli_v2__3                                                                                              | Therapeutic options in the case of cancer                                            |                                                                                                                                                                                                                                                                                                                                                                                                                                                                                                                                                                                                                                                                                                                                                                                                                                                                                                                                                                                                                                                                                                                                                                                                                                                                                                                                                                                                                                                                                                                                                                                                                                                                                                                                                                                                            |   |                   |                                                                                  |   |                   |        |   |                   |                 |   |                   |                                           |   |                   |                                                                                      |   |                   |                                                |   |                   |                 |   |                   |                 |   |                   |                     |   |                   |                                         |    |                    |                              |    |                    |                                     |    |                    |                                   |    |                    |                   |    |                    |                               |    |                    |                                               |    |                    |                           |    |                    |                   |
| 4   | pa_themecli_v2__4                                                                                              | Ways to reduce risk in carriers of a gene mutation that increases the risk of cancer |                                                                                                                                                                                                                                                                                                                                                                                                                                                                                                                                                                                                                                                                                                                                                                                                                                                                                                                                                                                                                                                                                                                                                                                                                                                                                                                                                                                                                                                                                                                                                                                                                                                                                                                                                                                                            |   |                   |                                                                                  |   |                   |        |   |                   |                 |   |                   |                                           |   |                   |                                                                                      |   |                   |                                                |   |                   |                 |   |                   |                 |   |                   |                     |   |                   |                                         |    |                    |                              |    |                    |                                     |    |                    |                                   |    |                    |                   |    |                    |                               |    |                    |                                               |    |                    |                           |    |                    |                   |
| 5   | pa_themecli_v2__5                                                                                              | Surgical and reconstructive options for cancer                                       |                                                                                                                                                                                                                                                                                                                                                                                                                                                                                                                                                                                                                                                                                                                                                                                                                                                                                                                                                                                                                                                                                                                                                                                                                                                                                                                                                                                                                                                                                                                                                                                                                                                                                                                                                                                                            |   |                   |                                                                                  |   |                   |        |   |                   |                 |   |                   |                                           |   |                   |                                                                                      |   |                   |                                                |   |                   |                 |   |                   |                 |   |                   |                     |   |                   |                                         |    |                    |                              |    |                    |                                     |    |                    |                                   |    |                    |                   |    |                    |                               |    |                    |                                               |    |                    |                           |    |                    |                   |
| 6   | pa_themecli_v2__6                                                                                              | Breast implants                                                                      |                                                                                                                                                                                                                                                                                                                                                                                                                                                                                                                                                                                                                                                                                                                                                                                                                                                                                                                                                                                                                                                                                                                                                                                                                                                                                                                                                                                                                                                                                                                                                                                                                                                                                                                                                                                                            |   |                   |                                                                                  |   |                   |        |   |                   |                 |   |                   |                                           |   |                   |                                                                                      |   |                   |                                                |   |                   |                 |   |                   |                 |   |                   |                     |   |                   |                                         |    |                    |                              |    |                    |                                     |    |                    |                                   |    |                    |                   |    |                    |                               |    |                    |                                               |    |                    |                           |    |                    |                   |
| 7   | pa_themecli_v2__7                                                                                              | Hormonal issues                                                                      |                                                                                                                                                                                                                                                                                                                                                                                                                                                                                                                                                                                                                                                                                                                                                                                                                                                                                                                                                                                                                                                                                                                                                                                                                                                                                                                                                                                                                                                                                                                                                                                                                                                                                                                                                                                                            |   |                   |                                                                                  |   |                   |        |   |                   |                 |   |                   |                                           |   |                   |                                                                                      |   |                   |                                                |   |                   |                 |   |                   |                 |   |                   |                     |   |                   |                                         |    |                    |                              |    |                    |                                     |    |                    |                                   |    |                    |                   |    |                    |                               |    |                    |                                               |    |                    |                           |    |                    |                   |
| 8   | pa_themecli_v2__8                                                                                              | Reproductive issues                                                                  |                                                                                                                                                                                                                                                                                                                                                                                                                                                                                                                                                                                                                                                                                                                                                                                                                                                                                                                                                                                                                                                                                                                                                                                                                                                                                                                                                                                                                                                                                                                                                                                                                                                                                                                                                                                                            |   |                   |                                                                                  |   |                   |        |   |                   |                 |   |                   |                                           |   |                   |                                                                                      |   |                   |                                                |   |                   |                 |   |                   |                 |   |                   |                     |   |                   |                                         |    |                    |                              |    |                    |                                     |    |                    |                                   |    |                    |                   |    |                    |                               |    |                    |                                               |    |                    |                           |    |                    |                   |
| 9   | pa_themecli_v2__9                                                                                              | Urinary and erectile dysfunction issues                                              |                                                                                                                                                                                                                                                                                                                                                                                                                                                                                                                                                                                                                                                                                                                                                                                                                                                                                                                                                                                                                                                                                                                                                                                                                                                                                                                                                                                                                                                                                                                                                                                                                                                                                                                                                                                                            |   |                   |                                                                                  |   |                   |        |   |                   |                 |   |                   |                                           |   |                   |                                                                                      |   |                   |                                                |   |                   |                 |   |                   |                 |   |                   |                     |   |                   |                                         |    |                    |                              |    |                    |                                     |    |                    |                                   |    |                    |                   |    |                    |                               |    |                    |                                               |    |                    |                           |    |                    |                   |
| 10  | pa_themecli_v2__10                                                                                             | Fatigue following treatments                                                         |                                                                                                                                                                                                                                                                                                                                                                                                                                                                                                                                                                                                                                                                                                                                                                                                                                                                                                                                                                                                                                                                                                                                                                                                                                                                                                                                                                                                                                                                                                                                                                                                                                                                                                                                                                                                            |   |                   |                                                                                  |   |                   |        |   |                   |                 |   |                   |                                           |   |                   |                                                                                      |   |                   |                                                |   |                   |                 |   |                   |                 |   |                   |                     |   |                   |                                         |    |                    |                              |    |                    |                                     |    |                    |                                   |    |                    |                   |    |                    |                               |    |                    |                                               |    |                    |                           |    |                    |                   |
| 11  | pa_themecli_v2__11                                                                                             | Pain and discomfort after treatment                                                  |                                                                                                                                                                                                                                                                                                                                                                                                                                                                                                                                                                                                                                                                                                                                                                                                                                                                                                                                                                                                                                                                                                                                                                                                                                                                                                                                                                                                                                                                                                                                                                                                                                                                                                                                                                                                            |   |                   |                                                                                  |   |                   |        |   |                   |                 |   |                   |                                           |   |                   |                                                                                      |   |                   |                                                |   |                   |                 |   |                   |                 |   |                   |                     |   |                   |                                         |    |                    |                              |    |                    |                                     |    |                    |                                   |    |                    |                   |    |                    |                               |    |                    |                                               |    |                    |                           |    |                    |                   |
| 12  | pa_themecli_v2__12                                                                                             | Pain and discomfort after surgery                                                    |                                                                                                                                                                                                                                                                                                                                                                                                                                                                                                                                                                                                                                                                                                                                                                                                                                                                                                                                                                                                                                                                                                                                                                                                                                                                                                                                                                                                                                                                                                                                                                                                                                                                                                                                                                                                            |   |                   |                                                                                  |   |                   |        |   |                   |                 |   |                   |                                           |   |                   |                                                                                      |   |                   |                                                |   |                   |                 |   |                   |                 |   |                   |                     |   |                   |                                         |    |                    |                              |    |                    |                                     |    |                    |                                   |    |                    |                   |    |                    |                               |    |                    |                                               |    |                    |                           |    |                    |                   |
| 13  | pa_themecli_v2__13                                                                                             | Possible emotions                                                                    |                                                                                                                                                                                                                                                                                                                                                                                                                                                                                                                                                                                                                                                                                                                                                                                                                                                                                                                                                                                                                                                                                                                                                                                                                                                                                                                                                                                                                                                                                                                                                                                                                                                                                                                                                                                                            |   |                   |                                                                                  |   |                   |        |   |                   |                 |   |                   |                                           |   |                   |                                                                                      |   |                   |                                                |   |                   |                 |   |                   |                 |   |                   |                     |   |                   |                                         |    |                    |                              |    |                    |                                     |    |                    |                                   |    |                    |                   |    |                    |                               |    |                    |                                               |    |                    |                           |    |                    |                   |
| 14  | pa_themecli_v2__14                                                                                             | Stress and anxiety management                                                        |                                                                                                                                                                                                                                                                                                                                                                                                                                                                                                                                                                                                                                                                                                                                                                                                                                                                                                                                                                                                                                                                                                                                                                                                                                                                                                                                                                                                                                                                                                                                                                                                                                                                                                                                                                                                            |   |                   |                                                                                  |   |                   |        |   |                   |                 |   |                   |                                           |   |                   |                                                                                      |   |                   |                                                |   |                   |                 |   |                   |                 |   |                   |                     |   |                   |                                         |    |                    |                              |    |                    |                                     |    |                    |                                   |    |                    |                   |    |                    |                               |    |                    |                                               |    |                    |                           |    |                    |                   |
| 15  | pa_themecli_v2__15                                                                                             | Impact on physical appearance and self-esteem                                        |                                                                                                                                                                                                                                                                                                                                                                                                                                                                                                                                                                                                                                                                                                                                                                                                                                                                                                                                                                                                                                                                                                                                                                                                                                                                                                                                                                                                                                                                                                                                                                                                                                                                                                                                                                                                            |   |                   |                                                                                  |   |                   |        |   |                   |                 |   |                   |                                           |   |                   |                                                                                      |   |                   |                                                |   |                   |                 |   |                   |                 |   |                   |                     |   |                   |                                         |    |                    |                              |    |                    |                                     |    |                    |                                   |    |                    |                   |    |                    |                               |    |                    |                                               |    |                    |                           |    |                    |                   |
| 16  | pa_themecli_v2__16                                                                                             | Decision-making processes                                                            |                                                                                                                                                                                                                                                                                                                                                                                                                                                                                                                                                                                                                                                                                                                                                                                                                                                                                                                                                                                                                                                                                                                                                                                                                                                                                                                                                                                                                                                                                                                                                                                                                                                                                                                                                                                                            |   |                   |                                                                                  |   |                   |        |   |                   |                 |   |                   |                                           |   |                   |                                                                                      |   |                   |                                                |   |                   |                 |   |                   |                 |   |                   |                     |   |                   |                                         |    |                    |                              |    |                    |                                     |    |                    |                                   |    |                    |                   |    |                    |                               |    |                    |                                               |    |                    |                           |    |                    |                   |
| 17  | pa_themecli_v2__17                                                                                             | Other information                                                                    |                                                                                                                                                                                                                                                                                                                                                                                                                                                                                                                                                                                                                                                                                                                                                                                                                                                                                                                                                                                                                                                                                                                                                                                                                                                                                                                                                                                                                                                                                                                                                                                                                                                                                                                                                                                                            |   |                   |                                                                                  |   |                   |        |   |                   |                 |   |                   |                                           |   |                   |                                                                                      |   |                   |                                                |   |                   |                 |   |                   |                 |   |                   |                     |   |                   |                                         |    |                    |                              |    |                    |                                     |    |                    |                                   |    |                    |                   |    |                    |                               |    |                    |                                               |    |                    |                           |    |                    |                   |
| 110 | pa_aspcin_autre_v2<br>Afficher le champ UNIQUEM<br>ENT si :<br>[pa_themecli_v2(17)] = '1'                      | If other information, please specify which one:                                      | text<br>Alignement personnalisé : LV                                                                                                                                                                                                                                                                                                                                                                                                                                                                                                                                                                                                                                                                                                                                                                                                                                                                                                                                                                                                                                                                                                                                                                                                                                                                                                                                                                                                                                                                                                                                                                                                                                                                                                                                                                       |   |                   |                                                                                  |   |                   |        |   |                   |                 |   |                   |                                           |   |                   |                                                                                      |   |                   |                                                |   |                   |                 |   |                   |                 |   |                   |                     |   |                   |                                         |    |                    |                              |    |                    |                                     |    |                    |                                   |    |                    |                   |    |                    |                               |    |                    |                                               |    |                    |                           |    |                    |                   |

|     |                                                                                                                     |                                                                                                                                         |                                                                                                                                                                                                                                                                                                                                                                                                                                                                                                                                                                                                                                                                                                                                                                                                                                                                                                                                                                                                                                                                                                                                                                                                                                                                                                                                                                                                                                                                                                   |   |                   |                                                                                                        |   |                   |                                                                   |   |                   |                                                                                                                                         |   |                   |                                                                               |   |                   |                                                             |   |                   |                                                                |   |                   |                                        |   |                   |                                                |   |                   |                        |   |                   |                           |    |                    |                                   |    |                    |                                            |    |                    |                                                             |    |                    |                                        |    |                    |                   |
|-----|---------------------------------------------------------------------------------------------------------------------|-----------------------------------------------------------------------------------------------------------------------------------------|---------------------------------------------------------------------------------------------------------------------------------------------------------------------------------------------------------------------------------------------------------------------------------------------------------------------------------------------------------------------------------------------------------------------------------------------------------------------------------------------------------------------------------------------------------------------------------------------------------------------------------------------------------------------------------------------------------------------------------------------------------------------------------------------------------------------------------------------------------------------------------------------------------------------------------------------------------------------------------------------------------------------------------------------------------------------------------------------------------------------------------------------------------------------------------------------------------------------------------------------------------------------------------------------------------------------------------------------------------------------------------------------------------------------------------------------------------------------------------------------------|---|-------------------|--------------------------------------------------------------------------------------------------------|---|-------------------|-------------------------------------------------------------------|---|-------------------|-----------------------------------------------------------------------------------------------------------------------------------------|---|-------------------|-------------------------------------------------------------------------------|---|-------------------|-------------------------------------------------------------|---|-------------------|----------------------------------------------------------------|---|-------------------|----------------------------------------|---|-------------------|------------------------------------------------|---|-------------------|------------------------|---|-------------------|---------------------------|----|--------------------|-----------------------------------|----|--------------------|--------------------------------------------|----|--------------------|-------------------------------------------------------------|----|--------------------|----------------------------------------|----|--------------------|-------------------|
| 111 | <p>pa_themequo_v2</p> <p>Afficher le champ UNIQUEM ENT si :<br/>[pa_jumelage_v2] = '0' and [pa_nbre_renc] = '2'</p> | <p>Consequences on daily life</p>                                                                                                       | <p>checkbox</p> <table border="1"> <tr> <td>0</td> <td>pa_themequo_v2__0</td> <td>Consequences on daily life</td> </tr> <tr> <td>1</td> <td>pa_themequo_v2__1</td> <td>Consequences on children</td> </tr> <tr> <td>2</td> <td>pa_themequo_v2__2</td> <td>Consequences on conjugal life</td> </tr> <tr> <td>3</td> <td>pa_themequo_v2__3</td> <td>Consequences on sexual life</td> </tr> <tr> <td>4</td> <td>pa_themequo_v2__4</td> <td>Returning to work</td> </tr> <tr> <td>5</td> <td>pa_themequo_v2__5</td> <td>The return to daily life</td> </tr> <tr> <td>6</td> <td>pa_themequo_v2__6</td> <td>The consequences on the spiritual life</td> </tr> <tr> <td>7</td> <td>pa_themequo_v2__7</td> <td>How to announce a diagnosis to your loved ones</td> </tr> <tr> <td>8</td> <td>pa_themequo_v2__8</td> <td>Financial implications</td> </tr> <tr> <td>9</td> <td>pa_themequo_v2__9</td> <td>Consequences on insurance</td> </tr> <tr> <td>10</td> <td>pa_themequo_v2__10</td> <td>Consequences on professional life</td> </tr> <tr> <td>11</td> <td>pa_themequo_v2__11</td> <td>Social perception (the reaction of others)</td> </tr> <tr> <td>12</td> <td>pa_themequo_v2__12</td> <td>Strategies for living the treatments in the best conditions</td> </tr> <tr> <td>13</td> <td>pa_themequo_v2__13</td> <td>How to regain control over the disease</td> </tr> <tr> <td>14</td> <td>pa_themequo_v2__14</td> <td>Other information</td> </tr> </table> <p>Alignement personnalisé : LV</p> | 0 | pa_themequo_v2__0 | Consequences on daily life                                                                             | 1 | pa_themequo_v2__1 | Consequences on children                                          | 2 | pa_themequo_v2__2 | Consequences on conjugal life                                                                                                           | 3 | pa_themequo_v2__3 | Consequences on sexual life                                                   | 4 | pa_themequo_v2__4 | Returning to work                                           | 5 | pa_themequo_v2__5 | The return to daily life                                       | 6 | pa_themequo_v2__6 | The consequences on the spiritual life | 7 | pa_themequo_v2__7 | How to announce a diagnosis to your loved ones | 8 | pa_themequo_v2__8 | Financial implications | 9 | pa_themequo_v2__9 | Consequences on insurance | 10 | pa_themequo_v2__10 | Consequences on professional life | 11 | pa_themequo_v2__11 | Social perception (the reaction of others) | 12 | pa_themequo_v2__12 | Strategies for living the treatments in the best conditions | 13 | pa_themequo_v2__13 | How to regain control over the disease | 14 | pa_themequo_v2__14 | Other information |
| 0   | pa_themequo_v2__0                                                                                                   | Consequences on daily life                                                                                                              |                                                                                                                                                                                                                                                                                                                                                                                                                                                                                                                                                                                                                                                                                                                                                                                                                                                                                                                                                                                                                                                                                                                                                                                                                                                                                                                                                                                                                                                                                                   |   |                   |                                                                                                        |   |                   |                                                                   |   |                   |                                                                                                                                         |   |                   |                                                                               |   |                   |                                                             |   |                   |                                                                |   |                   |                                        |   |                   |                                                |   |                   |                        |   |                   |                           |    |                    |                                   |    |                    |                                            |    |                    |                                                             |    |                    |                                        |    |                    |                   |
| 1   | pa_themequo_v2__1                                                                                                   | Consequences on children                                                                                                                |                                                                                                                                                                                                                                                                                                                                                                                                                                                                                                                                                                                                                                                                                                                                                                                                                                                                                                                                                                                                                                                                                                                                                                                                                                                                                                                                                                                                                                                                                                   |   |                   |                                                                                                        |   |                   |                                                                   |   |                   |                                                                                                                                         |   |                   |                                                                               |   |                   |                                                             |   |                   |                                                                |   |                   |                                        |   |                   |                                                |   |                   |                        |   |                   |                           |    |                    |                                   |    |                    |                                            |    |                    |                                                             |    |                    |                                        |    |                    |                   |
| 2   | pa_themequo_v2__2                                                                                                   | Consequences on conjugal life                                                                                                           |                                                                                                                                                                                                                                                                                                                                                                                                                                                                                                                                                                                                                                                                                                                                                                                                                                                                                                                                                                                                                                                                                                                                                                                                                                                                                                                                                                                                                                                                                                   |   |                   |                                                                                                        |   |                   |                                                                   |   |                   |                                                                                                                                         |   |                   |                                                                               |   |                   |                                                             |   |                   |                                                                |   |                   |                                        |   |                   |                                                |   |                   |                        |   |                   |                           |    |                    |                                   |    |                    |                                            |    |                    |                                                             |    |                    |                                        |    |                    |                   |
| 3   | pa_themequo_v2__3                                                                                                   | Consequences on sexual life                                                                                                             |                                                                                                                                                                                                                                                                                                                                                                                                                                                                                                                                                                                                                                                                                                                                                                                                                                                                                                                                                                                                                                                                                                                                                                                                                                                                                                                                                                                                                                                                                                   |   |                   |                                                                                                        |   |                   |                                                                   |   |                   |                                                                                                                                         |   |                   |                                                                               |   |                   |                                                             |   |                   |                                                                |   |                   |                                        |   |                   |                                                |   |                   |                        |   |                   |                           |    |                    |                                   |    |                    |                                            |    |                    |                                                             |    |                    |                                        |    |                    |                   |
| 4   | pa_themequo_v2__4                                                                                                   | Returning to work                                                                                                                       |                                                                                                                                                                                                                                                                                                                                                                                                                                                                                                                                                                                                                                                                                                                                                                                                                                                                                                                                                                                                                                                                                                                                                                                                                                                                                                                                                                                                                                                                                                   |   |                   |                                                                                                        |   |                   |                                                                   |   |                   |                                                                                                                                         |   |                   |                                                                               |   |                   |                                                             |   |                   |                                                                |   |                   |                                        |   |                   |                                                |   |                   |                        |   |                   |                           |    |                    |                                   |    |                    |                                            |    |                    |                                                             |    |                    |                                        |    |                    |                   |
| 5   | pa_themequo_v2__5                                                                                                   | The return to daily life                                                                                                                |                                                                                                                                                                                                                                                                                                                                                                                                                                                                                                                                                                                                                                                                                                                                                                                                                                                                                                                                                                                                                                                                                                                                                                                                                                                                                                                                                                                                                                                                                                   |   |                   |                                                                                                        |   |                   |                                                                   |   |                   |                                                                                                                                         |   |                   |                                                                               |   |                   |                                                             |   |                   |                                                                |   |                   |                                        |   |                   |                                                |   |                   |                        |   |                   |                           |    |                    |                                   |    |                    |                                            |    |                    |                                                             |    |                    |                                        |    |                    |                   |
| 6   | pa_themequo_v2__6                                                                                                   | The consequences on the spiritual life                                                                                                  |                                                                                                                                                                                                                                                                                                                                                                                                                                                                                                                                                                                                                                                                                                                                                                                                                                                                                                                                                                                                                                                                                                                                                                                                                                                                                                                                                                                                                                                                                                   |   |                   |                                                                                                        |   |                   |                                                                   |   |                   |                                                                                                                                         |   |                   |                                                                               |   |                   |                                                             |   |                   |                                                                |   |                   |                                        |   |                   |                                                |   |                   |                        |   |                   |                           |    |                    |                                   |    |                    |                                            |    |                    |                                                             |    |                    |                                        |    |                    |                   |
| 7   | pa_themequo_v2__7                                                                                                   | How to announce a diagnosis to your loved ones                                                                                          |                                                                                                                                                                                                                                                                                                                                                                                                                                                                                                                                                                                                                                                                                                                                                                                                                                                                                                                                                                                                                                                                                                                                                                                                                                                                                                                                                                                                                                                                                                   |   |                   |                                                                                                        |   |                   |                                                                   |   |                   |                                                                                                                                         |   |                   |                                                                               |   |                   |                                                             |   |                   |                                                                |   |                   |                                        |   |                   |                                                |   |                   |                        |   |                   |                           |    |                    |                                   |    |                    |                                            |    |                    |                                                             |    |                    |                                        |    |                    |                   |
| 8   | pa_themequo_v2__8                                                                                                   | Financial implications                                                                                                                  |                                                                                                                                                                                                                                                                                                                                                                                                                                                                                                                                                                                                                                                                                                                                                                                                                                                                                                                                                                                                                                                                                                                                                                                                                                                                                                                                                                                                                                                                                                   |   |                   |                                                                                                        |   |                   |                                                                   |   |                   |                                                                                                                                         |   |                   |                                                                               |   |                   |                                                             |   |                   |                                                                |   |                   |                                        |   |                   |                                                |   |                   |                        |   |                   |                           |    |                    |                                   |    |                    |                                            |    |                    |                                                             |    |                    |                                        |    |                    |                   |
| 9   | pa_themequo_v2__9                                                                                                   | Consequences on insurance                                                                                                               |                                                                                                                                                                                                                                                                                                                                                                                                                                                                                                                                                                                                                                                                                                                                                                                                                                                                                                                                                                                                                                                                                                                                                                                                                                                                                                                                                                                                                                                                                                   |   |                   |                                                                                                        |   |                   |                                                                   |   |                   |                                                                                                                                         |   |                   |                                                                               |   |                   |                                                             |   |                   |                                                                |   |                   |                                        |   |                   |                                                |   |                   |                        |   |                   |                           |    |                    |                                   |    |                    |                                            |    |                    |                                                             |    |                    |                                        |    |                    |                   |
| 10  | pa_themequo_v2__10                                                                                                  | Consequences on professional life                                                                                                       |                                                                                                                                                                                                                                                                                                                                                                                                                                                                                                                                                                                                                                                                                                                                                                                                                                                                                                                                                                                                                                                                                                                                                                                                                                                                                                                                                                                                                                                                                                   |   |                   |                                                                                                        |   |                   |                                                                   |   |                   |                                                                                                                                         |   |                   |                                                                               |   |                   |                                                             |   |                   |                                                                |   |                   |                                        |   |                   |                                                |   |                   |                        |   |                   |                           |    |                    |                                   |    |                    |                                            |    |                    |                                                             |    |                    |                                        |    |                    |                   |
| 11  | pa_themequo_v2__11                                                                                                  | Social perception (the reaction of others)                                                                                              |                                                                                                                                                                                                                                                                                                                                                                                                                                                                                                                                                                                                                                                                                                                                                                                                                                                                                                                                                                                                                                                                                                                                                                                                                                                                                                                                                                                                                                                                                                   |   |                   |                                                                                                        |   |                   |                                                                   |   |                   |                                                                                                                                         |   |                   |                                                                               |   |                   |                                                             |   |                   |                                                                |   |                   |                                        |   |                   |                                                |   |                   |                        |   |                   |                           |    |                    |                                   |    |                    |                                            |    |                    |                                                             |    |                    |                                        |    |                    |                   |
| 12  | pa_themequo_v2__12                                                                                                  | Strategies for living the treatments in the best conditions                                                                             |                                                                                                                                                                                                                                                                                                                                                                                                                                                                                                                                                                                                                                                                                                                                                                                                                                                                                                                                                                                                                                                                                                                                                                                                                                                                                                                                                                                                                                                                                                   |   |                   |                                                                                                        |   |                   |                                                                   |   |                   |                                                                                                                                         |   |                   |                                                                               |   |                   |                                                             |   |                   |                                                                |   |                   |                                        |   |                   |                                                |   |                   |                        |   |                   |                           |    |                    |                                   |    |                    |                                            |    |                    |                                                             |    |                    |                                        |    |                    |                   |
| 13  | pa_themequo_v2__13                                                                                                  | How to regain control over the disease                                                                                                  |                                                                                                                                                                                                                                                                                                                                                                                                                                                                                                                                                                                                                                                                                                                                                                                                                                                                                                                                                                                                                                                                                                                                                                                                                                                                                                                                                                                                                                                                                                   |   |                   |                                                                                                        |   |                   |                                                                   |   |                   |                                                                                                                                         |   |                   |                                                                               |   |                   |                                                             |   |                   |                                                                |   |                   |                                        |   |                   |                                                |   |                   |                        |   |                   |                           |    |                    |                                   |    |                    |                                            |    |                    |                                                             |    |                    |                                        |    |                    |                   |
| 14  | pa_themequo_v2__14                                                                                                  | Other information                                                                                                                       |                                                                                                                                                                                                                                                                                                                                                                                                                                                                                                                                                                                                                                                                                                                                                                                                                                                                                                                                                                                                                                                                                                                                                                                                                                                                                                                                                                                                                                                                                                   |   |                   |                                                                                                        |   |                   |                                                                   |   |                   |                                                                                                                                         |   |                   |                                                                               |   |                   |                                                             |   |                   |                                                                |   |                   |                                        |   |                   |                                                |   |                   |                        |   |                   |                           |    |                    |                                   |    |                    |                                            |    |                    |                                                             |    |                    |                                        |    |                    |                   |
| 112 | <p>pa_asp_viequot_autre_v2</p> <p>Afficher le champ UNIQUEM ENT si :<br/>[pa_themequo_v2(14)] = '1'</p>             | <p>If other information, please specify which one:</p>                                                                                  | <p>text</p> <p>Alignement personnalisé : LV</p>                                                                                                                                                                                                                                                                                                                                                                                                                                                                                                                                                                                                                                                                                                                                                                                                                                                                                                                                                                                                                                                                                                                                                                                                                                                                                                                                                                                                                                                   |   |                   |                                                                                                        |   |                   |                                                                   |   |                   |                                                                                                                                         |   |                   |                                                                               |   |                   |                                                             |   |                   |                                                                |   |                   |                                        |   |                   |                                                |   |                   |                        |   |                   |                           |    |                    |                                   |    |                    |                                            |    |                    |                                                             |    |                    |                                        |    |                    |                   |
| 113 | <p>pa_bene_v2</p> <p>Afficher le champ UNIQUEM ENT si :<br/>[pa_jumelage_v2] = '0' and [pa_nbre_renc] = '2'</p>     | <p>In what area has the accompaniment been beneficial? (You may check more than one answer.)</p>                                        | <p>checkbox</p> <table border="1"> <tr> <td>0</td> <td>pa_bene_v2__0</td> <td>My understanding of my care pathway within the health care institution (steps, role of each person...)</td> </tr> <tr> <td>1</td> <td>pa_bene_v2__1</td> <td>My relationships and exchanges with the medical and nursing teams</td> </tr> <tr> <td>2</td> <td>pa_bene_v2__2</td> <td>My experience of the disease (sharing experiences on side effects, on the impact of the disease on daily life, with those around me...)</td> </tr> <tr> <td>3</td> <td>pa_bene_v2__3</td> <td>My quality of life (decrease in stress level, anxiety, feeling understood...)</td> </tr> <tr> <td>4</td> <td>pa_bene_v2__4</td> <td>My knowledge of services and associations that can help me.</td> </tr> <tr> <td>5</td> <td>pa_bene_v2__5</td> <td>This accompaniment has not been particularly beneficial to me.</td> </tr> <tr> <td>6</td> <td>pa_bene_v2__6</td> <td>Other</td> </tr> </table> <p>Alignement personnalisé : LV</p>                                                                                                                                                                                                                                                                                                                                                                                                                                                                                         | 0 | pa_bene_v2__0     | My understanding of my care pathway within the health care institution (steps, role of each person...) | 1 | pa_bene_v2__1     | My relationships and exchanges with the medical and nursing teams | 2 | pa_bene_v2__2     | My experience of the disease (sharing experiences on side effects, on the impact of the disease on daily life, with those around me...) | 3 | pa_bene_v2__3     | My quality of life (decrease in stress level, anxiety, feeling understood...) | 4 | pa_bene_v2__4     | My knowledge of services and associations that can help me. | 5 | pa_bene_v2__5     | This accompaniment has not been particularly beneficial to me. | 6 | pa_bene_v2__6     | Other                                  |   |                   |                                                |   |                   |                        |   |                   |                           |    |                    |                                   |    |                    |                                            |    |                    |                                                             |    |                    |                                        |    |                    |                   |
| 0   | pa_bene_v2__0                                                                                                       | My understanding of my care pathway within the health care institution (steps, role of each person...)                                  |                                                                                                                                                                                                                                                                                                                                                                                                                                                                                                                                                                                                                                                                                                                                                                                                                                                                                                                                                                                                                                                                                                                                                                                                                                                                                                                                                                                                                                                                                                   |   |                   |                                                                                                        |   |                   |                                                                   |   |                   |                                                                                                                                         |   |                   |                                                                               |   |                   |                                                             |   |                   |                                                                |   |                   |                                        |   |                   |                                                |   |                   |                        |   |                   |                           |    |                    |                                   |    |                    |                                            |    |                    |                                                             |    |                    |                                        |    |                    |                   |
| 1   | pa_bene_v2__1                                                                                                       | My relationships and exchanges with the medical and nursing teams                                                                       |                                                                                                                                                                                                                                                                                                                                                                                                                                                                                                                                                                                                                                                                                                                                                                                                                                                                                                                                                                                                                                                                                                                                                                                                                                                                                                                                                                                                                                                                                                   |   |                   |                                                                                                        |   |                   |                                                                   |   |                   |                                                                                                                                         |   |                   |                                                                               |   |                   |                                                             |   |                   |                                                                |   |                   |                                        |   |                   |                                                |   |                   |                        |   |                   |                           |    |                    |                                   |    |                    |                                            |    |                    |                                                             |    |                    |                                        |    |                    |                   |
| 2   | pa_bene_v2__2                                                                                                       | My experience of the disease (sharing experiences on side effects, on the impact of the disease on daily life, with those around me...) |                                                                                                                                                                                                                                                                                                                                                                                                                                                                                                                                                                                                                                                                                                                                                                                                                                                                                                                                                                                                                                                                                                                                                                                                                                                                                                                                                                                                                                                                                                   |   |                   |                                                                                                        |   |                   |                                                                   |   |                   |                                                                                                                                         |   |                   |                                                                               |   |                   |                                                             |   |                   |                                                                |   |                   |                                        |   |                   |                                                |   |                   |                        |   |                   |                           |    |                    |                                   |    |                    |                                            |    |                    |                                                             |    |                    |                                        |    |                    |                   |
| 3   | pa_bene_v2__3                                                                                                       | My quality of life (decrease in stress level, anxiety, feeling understood...)                                                           |                                                                                                                                                                                                                                                                                                                                                                                                                                                                                                                                                                                                                                                                                                                                                                                                                                                                                                                                                                                                                                                                                                                                                                                                                                                                                                                                                                                                                                                                                                   |   |                   |                                                                                                        |   |                   |                                                                   |   |                   |                                                                                                                                         |   |                   |                                                                               |   |                   |                                                             |   |                   |                                                                |   |                   |                                        |   |                   |                                                |   |                   |                        |   |                   |                           |    |                    |                                   |    |                    |                                            |    |                    |                                                             |    |                    |                                        |    |                    |                   |
| 4   | pa_bene_v2__4                                                                                                       | My knowledge of services and associations that can help me.                                                                             |                                                                                                                                                                                                                                                                                                                                                                                                                                                                                                                                                                                                                                                                                                                                                                                                                                                                                                                                                                                                                                                                                                                                                                                                                                                                                                                                                                                                                                                                                                   |   |                   |                                                                                                        |   |                   |                                                                   |   |                   |                                                                                                                                         |   |                   |                                                                               |   |                   |                                                             |   |                   |                                                                |   |                   |                                        |   |                   |                                                |   |                   |                        |   |                   |                           |    |                    |                                   |    |                    |                                            |    |                    |                                                             |    |                    |                                        |    |                    |                   |
| 5   | pa_bene_v2__5                                                                                                       | This accompaniment has not been particularly beneficial to me.                                                                          |                                                                                                                                                                                                                                                                                                                                                                                                                                                                                                                                                                                                                                                                                                                                                                                                                                                                                                                                                                                                                                                                                                                                                                                                                                                                                                                                                                                                                                                                                                   |   |                   |                                                                                                        |   |                   |                                                                   |   |                   |                                                                                                                                         |   |                   |                                                                               |   |                   |                                                             |   |                   |                                                                |   |                   |                                        |   |                   |                                                |   |                   |                        |   |                   |                           |    |                    |                                   |    |                    |                                            |    |                    |                                                             |    |                    |                                        |    |                    |                   |
| 6   | pa_bene_v2__6                                                                                                       | Other                                                                                                                                   |                                                                                                                                                                                                                                                                                                                                                                                                                                                                                                                                                                                                                                                                                                                                                                                                                                                                                                                                                                                                                                                                                                                                                                                                                                                                                                                                                                                                                                                                                                   |   |                   |                                                                                                        |   |                   |                                                                   |   |                   |                                                                                                                                         |   |                   |                                                                               |   |                   |                                                             |   |                   |                                                                |   |                   |                                        |   |                   |                                                |   |                   |                        |   |                   |                           |    |                    |                                   |    |                    |                                            |    |                    |                                                             |    |                    |                                        |    |                    |                   |
| 114 | <p>pa_bene_autre_v2</p> <p>Afficher le champ UNIQUEM ENT si :<br/>[pa_bene_v2(6)] = '1'</p>                         | <p>If other benefit, please specify which one:</p>                                                                                      | <p>text</p> <p>Alignement personnalisé : LV</p>                                                                                                                                                                                                                                                                                                                                                                                                                                                                                                                                                                                                                                                                                                                                                                                                                                                                                                                                                                                                                                                                                                                                                                                                                                                                                                                                                                                                                                                   |   |                   |                                                                                                        |   |                   |                                                                   |   |                   |                                                                                                                                         |   |                   |                                                                               |   |                   |                                                             |   |                   |                                                                |   |                   |                                        |   |                   |                                                |   |                   |                        |   |                   |                           |    |                    |                                   |    |                    |                                            |    |                    |                                                             |    |                    |                                        |    |                    |                   |

|     |                                                                                                                        |                                                                                                              |                                                                                                                                                                                                                                                                                                                                                                                                                                                                                                                                                                                                                                                                                                                                                                                                                                                                                                                                                                                                                                                                                                                                                                                                                                                                                                                                                                                                                                                                                                                                                                                                                                                                                                                                                                                                                                                                                                                     |   |                   |                    |          |                 |                            |   |                 |                     |                |                 |                                                                                          |   |                 |                                                                    |   |                 |                                                                                    |   |                 |                                 |   |                 |                                                |   |                 |                                               |    |                  |                                                    |    |                  |                                               |    |                  |                                              |    |                  |                                                                                   |    |                  |                                                             |    |                  |                          |    |                  |                    |    |                  |                                                                                        |
|-----|------------------------------------------------------------------------------------------------------------------------|--------------------------------------------------------------------------------------------------------------|---------------------------------------------------------------------------------------------------------------------------------------------------------------------------------------------------------------------------------------------------------------------------------------------------------------------------------------------------------------------------------------------------------------------------------------------------------------------------------------------------------------------------------------------------------------------------------------------------------------------------------------------------------------------------------------------------------------------------------------------------------------------------------------------------------------------------------------------------------------------------------------------------------------------------------------------------------------------------------------------------------------------------------------------------------------------------------------------------------------------------------------------------------------------------------------------------------------------------------------------------------------------------------------------------------------------------------------------------------------------------------------------------------------------------------------------------------------------------------------------------------------------------------------------------------------------------------------------------------------------------------------------------------------------------------------------------------------------------------------------------------------------------------------------------------------------------------------------------------------------------------------------------------------------|---|-------------------|--------------------|----------|-----------------|----------------------------|---|-----------------|---------------------|----------------|-----------------|------------------------------------------------------------------------------------------|---|-----------------|--------------------------------------------------------------------|---|-----------------|------------------------------------------------------------------------------------|---|-----------------|---------------------------------|---|-----------------|------------------------------------------------|---|-----------------|-----------------------------------------------|----|------------------|----------------------------------------------------|----|------------------|-----------------------------------------------|----|------------------|----------------------------------------------|----|------------------|-----------------------------------------------------------------------------------|----|------------------|-------------------------------------------------------------|----|------------------|--------------------------|----|------------------|--------------------|----|------------------|----------------------------------------------------------------------------------------|
| 115 | <p>pa_contri_v2</p> <p>Afficher le champ UNIQUEM ENT si :<br/>[pa_jumelage_v2] = '0' and [pa_nbre_renc] = '2'</p>      | <p>In your opinion, what is the contribution of the patient advisor? You may check more than one answer.</p> | <p>checkbox</p> <table border="1" data-bbox="1026 107 1493 1368"> <tr><td>1</td><td>pa_contri_v2__1</td><td>Giving information</td></tr> <tr><td>2</td><td>pa_contri_v2__2</td><td>Giving support</td></tr> <tr><td>3</td><td>pa_contri_v2__3</td><td>Sharing experiences</td></tr> <tr><td>4</td><td>pa_contri_v2__4</td><td>Facilitate communication between the health care team and the patient being accompanied.</td></tr> <tr><td>5</td><td>pa_contri_v2__5</td><td>Helping to bring the patient's perspective to the health care team</td></tr> <tr><td>6</td><td>pa_contri_v2__6</td><td>Improving understanding of information shared between patient and health care team</td></tr> <tr><td>7</td><td>pa_contri_v2__7</td><td>Helping to remember information</td></tr> <tr><td>8</td><td>pa_contri_v2__8</td><td>Preparing the patient for medical appointments</td></tr> <tr><td>9</td><td>pa_contri_v2__9</td><td>Accompanying patients to medical appointments</td></tr> <tr><td>10</td><td>pa_contri_v2__10</td><td>Helping the patient participate in decision making</td></tr> <tr><td>11</td><td>pa_contri_v2__11</td><td>Bringing a new perspective to decision making</td></tr> <tr><td>12</td><td>pa_contri_v2__12</td><td>Referring patients to a variety of resources</td></tr> <tr><td>13</td><td>pa_contri_v2__13</td><td>Help develop a trusting relationship between the patient and the health care team</td></tr> <tr><td>14</td><td>pa_contri_v2__14</td><td>Helping the patient become a partner in his or her own care</td></tr> <tr><td>15</td><td>pa_contri_v2__15</td><td>Listening to the patient</td></tr> <tr><td>16</td><td>pa_contri_v2__16</td><td>Other contribution</td></tr> <tr><td>17</td><td>pa_contri_v2__17</td><td>No, the patient advisor has no particular contribution to make to the care trajectory.</td></tr> </table> <p>Alignement personnalisé : LV</p> | 1 | pa_contri_v2__1   | Giving information | 2        | pa_contri_v2__2 | Giving support             | 3 | pa_contri_v2__3 | Sharing experiences | 4              | pa_contri_v2__4 | Facilitate communication between the health care team and the patient being accompanied. | 5 | pa_contri_v2__5 | Helping to bring the patient's perspective to the health care team | 6 | pa_contri_v2__6 | Improving understanding of information shared between patient and health care team | 7 | pa_contri_v2__7 | Helping to remember information | 8 | pa_contri_v2__8 | Preparing the patient for medical appointments | 9 | pa_contri_v2__9 | Accompanying patients to medical appointments | 10 | pa_contri_v2__10 | Helping the patient participate in decision making | 11 | pa_contri_v2__11 | Bringing a new perspective to decision making | 12 | pa_contri_v2__12 | Referring patients to a variety of resources | 13 | pa_contri_v2__13 | Help develop a trusting relationship between the patient and the health care team | 14 | pa_contri_v2__14 | Helping the patient become a partner in his or her own care | 15 | pa_contri_v2__15 | Listening to the patient | 16 | pa_contri_v2__16 | Other contribution | 17 | pa_contri_v2__17 | No, the patient advisor has no particular contribution to make to the care trajectory. |
| 1   | pa_contri_v2__1                                                                                                        | Giving information                                                                                           |                                                                                                                                                                                                                                                                                                                                                                                                                                                                                                                                                                                                                                                                                                                                                                                                                                                                                                                                                                                                                                                                                                                                                                                                                                                                                                                                                                                                                                                                                                                                                                                                                                                                                                                                                                                                                                                                                                                     |   |                   |                    |          |                 |                            |   |                 |                     |                |                 |                                                                                          |   |                 |                                                                    |   |                 |                                                                                    |   |                 |                                 |   |                 |                                                |   |                 |                                               |    |                  |                                                    |    |                  |                                               |    |                  |                                              |    |                  |                                                                                   |    |                  |                                                             |    |                  |                          |    |                  |                    |    |                  |                                                                                        |
| 2   | pa_contri_v2__2                                                                                                        | Giving support                                                                                               |                                                                                                                                                                                                                                                                                                                                                                                                                                                                                                                                                                                                                                                                                                                                                                                                                                                                                                                                                                                                                                                                                                                                                                                                                                                                                                                                                                                                                                                                                                                                                                                                                                                                                                                                                                                                                                                                                                                     |   |                   |                    |          |                 |                            |   |                 |                     |                |                 |                                                                                          |   |                 |                                                                    |   |                 |                                                                                    |   |                 |                                 |   |                 |                                                |   |                 |                                               |    |                  |                                                    |    |                  |                                               |    |                  |                                              |    |                  |                                                                                   |    |                  |                                                             |    |                  |                          |    |                  |                    |    |                  |                                                                                        |
| 3   | pa_contri_v2__3                                                                                                        | Sharing experiences                                                                                          |                                                                                                                                                                                                                                                                                                                                                                                                                                                                                                                                                                                                                                                                                                                                                                                                                                                                                                                                                                                                                                                                                                                                                                                                                                                                                                                                                                                                                                                                                                                                                                                                                                                                                                                                                                                                                                                                                                                     |   |                   |                    |          |                 |                            |   |                 |                     |                |                 |                                                                                          |   |                 |                                                                    |   |                 |                                                                                    |   |                 |                                 |   |                 |                                                |   |                 |                                               |    |                  |                                                    |    |                  |                                               |    |                  |                                              |    |                  |                                                                                   |    |                  |                                                             |    |                  |                          |    |                  |                    |    |                  |                                                                                        |
| 4   | pa_contri_v2__4                                                                                                        | Facilitate communication between the health care team and the patient being accompanied.                     |                                                                                                                                                                                                                                                                                                                                                                                                                                                                                                                                                                                                                                                                                                                                                                                                                                                                                                                                                                                                                                                                                                                                                                                                                                                                                                                                                                                                                                                                                                                                                                                                                                                                                                                                                                                                                                                                                                                     |   |                   |                    |          |                 |                            |   |                 |                     |                |                 |                                                                                          |   |                 |                                                                    |   |                 |                                                                                    |   |                 |                                 |   |                 |                                                |   |                 |                                               |    |                  |                                                    |    |                  |                                               |    |                  |                                              |    |                  |                                                                                   |    |                  |                                                             |    |                  |                          |    |                  |                    |    |                  |                                                                                        |
| 5   | pa_contri_v2__5                                                                                                        | Helping to bring the patient's perspective to the health care team                                           |                                                                                                                                                                                                                                                                                                                                                                                                                                                                                                                                                                                                                                                                                                                                                                                                                                                                                                                                                                                                                                                                                                                                                                                                                                                                                                                                                                                                                                                                                                                                                                                                                                                                                                                                                                                                                                                                                                                     |   |                   |                    |          |                 |                            |   |                 |                     |                |                 |                                                                                          |   |                 |                                                                    |   |                 |                                                                                    |   |                 |                                 |   |                 |                                                |   |                 |                                               |    |                  |                                                    |    |                  |                                               |    |                  |                                              |    |                  |                                                                                   |    |                  |                                                             |    |                  |                          |    |                  |                    |    |                  |                                                                                        |
| 6   | pa_contri_v2__6                                                                                                        | Improving understanding of information shared between patient and health care team                           |                                                                                                                                                                                                                                                                                                                                                                                                                                                                                                                                                                                                                                                                                                                                                                                                                                                                                                                                                                                                                                                                                                                                                                                                                                                                                                                                                                                                                                                                                                                                                                                                                                                                                                                                                                                                                                                                                                                     |   |                   |                    |          |                 |                            |   |                 |                     |                |                 |                                                                                          |   |                 |                                                                    |   |                 |                                                                                    |   |                 |                                 |   |                 |                                                |   |                 |                                               |    |                  |                                                    |    |                  |                                               |    |                  |                                              |    |                  |                                                                                   |    |                  |                                                             |    |                  |                          |    |                  |                    |    |                  |                                                                                        |
| 7   | pa_contri_v2__7                                                                                                        | Helping to remember information                                                                              |                                                                                                                                                                                                                                                                                                                                                                                                                                                                                                                                                                                                                                                                                                                                                                                                                                                                                                                                                                                                                                                                                                                                                                                                                                                                                                                                                                                                                                                                                                                                                                                                                                                                                                                                                                                                                                                                                                                     |   |                   |                    |          |                 |                            |   |                 |                     |                |                 |                                                                                          |   |                 |                                                                    |   |                 |                                                                                    |   |                 |                                 |   |                 |                                                |   |                 |                                               |    |                  |                                                    |    |                  |                                               |    |                  |                                              |    |                  |                                                                                   |    |                  |                                                             |    |                  |                          |    |                  |                    |    |                  |                                                                                        |
| 8   | pa_contri_v2__8                                                                                                        | Preparing the patient for medical appointments                                                               |                                                                                                                                                                                                                                                                                                                                                                                                                                                                                                                                                                                                                                                                                                                                                                                                                                                                                                                                                                                                                                                                                                                                                                                                                                                                                                                                                                                                                                                                                                                                                                                                                                                                                                                                                                                                                                                                                                                     |   |                   |                    |          |                 |                            |   |                 |                     |                |                 |                                                                                          |   |                 |                                                                    |   |                 |                                                                                    |   |                 |                                 |   |                 |                                                |   |                 |                                               |    |                  |                                                    |    |                  |                                               |    |                  |                                              |    |                  |                                                                                   |    |                  |                                                             |    |                  |                          |    |                  |                    |    |                  |                                                                                        |
| 9   | pa_contri_v2__9                                                                                                        | Accompanying patients to medical appointments                                                                |                                                                                                                                                                                                                                                                                                                                                                                                                                                                                                                                                                                                                                                                                                                                                                                                                                                                                                                                                                                                                                                                                                                                                                                                                                                                                                                                                                                                                                                                                                                                                                                                                                                                                                                                                                                                                                                                                                                     |   |                   |                    |          |                 |                            |   |                 |                     |                |                 |                                                                                          |   |                 |                                                                    |   |                 |                                                                                    |   |                 |                                 |   |                 |                                                |   |                 |                                               |    |                  |                                                    |    |                  |                                               |    |                  |                                              |    |                  |                                                                                   |    |                  |                                                             |    |                  |                          |    |                  |                    |    |                  |                                                                                        |
| 10  | pa_contri_v2__10                                                                                                       | Helping the patient participate in decision making                                                           |                                                                                                                                                                                                                                                                                                                                                                                                                                                                                                                                                                                                                                                                                                                                                                                                                                                                                                                                                                                                                                                                                                                                                                                                                                                                                                                                                                                                                                                                                                                                                                                                                                                                                                                                                                                                                                                                                                                     |   |                   |                    |          |                 |                            |   |                 |                     |                |                 |                                                                                          |   |                 |                                                                    |   |                 |                                                                                    |   |                 |                                 |   |                 |                                                |   |                 |                                               |    |                  |                                                    |    |                  |                                               |    |                  |                                              |    |                  |                                                                                   |    |                  |                                                             |    |                  |                          |    |                  |                    |    |                  |                                                                                        |
| 11  | pa_contri_v2__11                                                                                                       | Bringing a new perspective to decision making                                                                |                                                                                                                                                                                                                                                                                                                                                                                                                                                                                                                                                                                                                                                                                                                                                                                                                                                                                                                                                                                                                                                                                                                                                                                                                                                                                                                                                                                                                                                                                                                                                                                                                                                                                                                                                                                                                                                                                                                     |   |                   |                    |          |                 |                            |   |                 |                     |                |                 |                                                                                          |   |                 |                                                                    |   |                 |                                                                                    |   |                 |                                 |   |                 |                                                |   |                 |                                               |    |                  |                                                    |    |                  |                                               |    |                  |                                              |    |                  |                                                                                   |    |                  |                                                             |    |                  |                          |    |                  |                    |    |                  |                                                                                        |
| 12  | pa_contri_v2__12                                                                                                       | Referring patients to a variety of resources                                                                 |                                                                                                                                                                                                                                                                                                                                                                                                                                                                                                                                                                                                                                                                                                                                                                                                                                                                                                                                                                                                                                                                                                                                                                                                                                                                                                                                                                                                                                                                                                                                                                                                                                                                                                                                                                                                                                                                                                                     |   |                   |                    |          |                 |                            |   |                 |                     |                |                 |                                                                                          |   |                 |                                                                    |   |                 |                                                                                    |   |                 |                                 |   |                 |                                                |   |                 |                                               |    |                  |                                                    |    |                  |                                               |    |                  |                                              |    |                  |                                                                                   |    |                  |                                                             |    |                  |                          |    |                  |                    |    |                  |                                                                                        |
| 13  | pa_contri_v2__13                                                                                                       | Help develop a trusting relationship between the patient and the health care team                            |                                                                                                                                                                                                                                                                                                                                                                                                                                                                                                                                                                                                                                                                                                                                                                                                                                                                                                                                                                                                                                                                                                                                                                                                                                                                                                                                                                                                                                                                                                                                                                                                                                                                                                                                                                                                                                                                                                                     |   |                   |                    |          |                 |                            |   |                 |                     |                |                 |                                                                                          |   |                 |                                                                    |   |                 |                                                                                    |   |                 |                                 |   |                 |                                                |   |                 |                                               |    |                  |                                                    |    |                  |                                               |    |                  |                                              |    |                  |                                                                                   |    |                  |                                                             |    |                  |                          |    |                  |                    |    |                  |                                                                                        |
| 14  | pa_contri_v2__14                                                                                                       | Helping the patient become a partner in his or her own care                                                  |                                                                                                                                                                                                                                                                                                                                                                                                                                                                                                                                                                                                                                                                                                                                                                                                                                                                                                                                                                                                                                                                                                                                                                                                                                                                                                                                                                                                                                                                                                                                                                                                                                                                                                                                                                                                                                                                                                                     |   |                   |                    |          |                 |                            |   |                 |                     |                |                 |                                                                                          |   |                 |                                                                    |   |                 |                                                                                    |   |                 |                                 |   |                 |                                                |   |                 |                                               |    |                  |                                                    |    |                  |                                               |    |                  |                                              |    |                  |                                                                                   |    |                  |                                                             |    |                  |                          |    |                  |                    |    |                  |                                                                                        |
| 15  | pa_contri_v2__15                                                                                                       | Listening to the patient                                                                                     |                                                                                                                                                                                                                                                                                                                                                                                                                                                                                                                                                                                                                                                                                                                                                                                                                                                                                                                                                                                                                                                                                                                                                                                                                                                                                                                                                                                                                                                                                                                                                                                                                                                                                                                                                                                                                                                                                                                     |   |                   |                    |          |                 |                            |   |                 |                     |                |                 |                                                                                          |   |                 |                                                                    |   |                 |                                                                                    |   |                 |                                 |   |                 |                                                |   |                 |                                               |    |                  |                                                    |    |                  |                                               |    |                  |                                              |    |                  |                                                                                   |    |                  |                                                             |    |                  |                          |    |                  |                    |    |                  |                                                                                        |
| 16  | pa_contri_v2__16                                                                                                       | Other contribution                                                                                           |                                                                                                                                                                                                                                                                                                                                                                                                                                                                                                                                                                                                                                                                                                                                                                                                                                                                                                                                                                                                                                                                                                                                                                                                                                                                                                                                                                                                                                                                                                                                                                                                                                                                                                                                                                                                                                                                                                                     |   |                   |                    |          |                 |                            |   |                 |                     |                |                 |                                                                                          |   |                 |                                                                    |   |                 |                                                                                    |   |                 |                                 |   |                 |                                                |   |                 |                                               |    |                  |                                                    |    |                  |                                               |    |                  |                                              |    |                  |                                                                                   |    |                  |                                                             |    |                  |                          |    |                  |                    |    |                  |                                                                                        |
| 17  | pa_contri_v2__17                                                                                                       | No, the patient advisor has no particular contribution to make to the care trajectory.                       |                                                                                                                                                                                                                                                                                                                                                                                                                                                                                                                                                                                                                                                                                                                                                                                                                                                                                                                                                                                                                                                                                                                                                                                                                                                                                                                                                                                                                                                                                                                                                                                                                                                                                                                                                                                                                                                                                                                     |   |                   |                    |          |                 |                            |   |                 |                     |                |                 |                                                                                          |   |                 |                                                                    |   |                 |                                                                                    |   |                 |                                 |   |                 |                                                |   |                 |                                               |    |                  |                                                    |    |                  |                                               |    |                  |                                              |    |                  |                                                                                   |    |                  |                                                             |    |                  |                          |    |                  |                    |    |                  |                                                                                        |
| 116 | <p>pa_contriautre_v2</p> <p>Afficher le champ UNIQUEM ENT si :<br/>[pa_contri_v2(16)] = '1'</p>                        | <p>Please indicate what other contribution the patient advisor made.</p>                                     | <p>text</p> <p>Alignement personnalisé : LV</p>                                                                                                                                                                                                                                                                                                                                                                                                                                                                                                                                                                                                                                                                                                                                                                                                                                                                                                                                                                                                                                                                                                                                                                                                                                                                                                                                                                                                                                                                                                                                                                                                                                                                                                                                                                                                                                                                     |   |                   |                    |          |                 |                            |   |                 |                     |                |                 |                                                                                          |   |                 |                                                                    |   |                 |                                                                                    |   |                 |                                 |   |                 |                                                |   |                 |                                               |    |                  |                                                    |    |                  |                                               |    |                  |                                              |    |                  |                                                                                   |    |                  |                                                             |    |                  |                          |    |                  |                    |    |                  |                                                                                        |
| 117 | <p>pa_postacc_mat_v2</p> <p>Afficher le champ UNIQUEM ENT si :<br/>[pa_jumelage_v2] = '0' and [pa_nbre_renc] = '2'</p> | <p>To what extent do you agree with each of the following statements?</p>                                    | <p>descriptive</p>                                                                                                                                                                                                                                                                                                                                                                                                                                                                                                                                                                                                                                                                                                                                                                                                                                                                                                                                                                                                                                                                                                                                                                                                                                                                                                                                                                                                                                                                                                                                                                                                                                                                                                                                                                                                                                                                                                  |   |                   |                    |          |                 |                            |   |                 |                     |                |                 |                                                                                          |   |                 |                                                                    |   |                 |                                                                                    |   |                 |                                 |   |                 |                                                |   |                 |                                               |    |                  |                                                    |    |                  |                                               |    |                  |                                              |    |                  |                                                                                   |    |                  |                                                             |    |                  |                          |    |                  |                    |    |                  |                                                                                        |
| 118 | <p>mat_post_bes_v2</p> <p>Afficher le champ UNIQUEM ENT si :<br/>[pa_jumelage_v2] = '0' and [pa_nbre_renc] = '2'</p>   | <p>This/these meeting(s) with a patient advisor met my needs:</p>                                            | <p>radio (Matrice)</p> <table border="1" data-bbox="1026 1749 1305 1984"> <tr><td>1</td><td>Strongly Disagree</td></tr> <tr><td>2</td><td>Disagree</td></tr> <tr><td>3</td><td>Neither agree nor disagree</td></tr> <tr><td>4</td><td>Agree</td></tr> <tr><td>5</td><td>Strongly agree</td></tr> <tr><td>6</td><td>I don't know</td></tr> </table>                                                                                                                                                                                                                                                                                                                                                                                                                                                                                                                                                                                                                                                                                                                                                                                                                                                                                                                                                                                                                                                                                                                                                                                                                                                                                                                                                                                                                                                                                                                                                                  | 1 | Strongly Disagree | 2                  | Disagree | 3               | Neither agree nor disagree | 4 | Agree           | 5                   | Strongly agree | 6               | I don't know                                                                             |   |                 |                                                                    |   |                 |                                                                                    |   |                 |                                 |   |                 |                                                |   |                 |                                               |    |                  |                                                    |    |                  |                                               |    |                  |                                              |    |                  |                                                                                   |    |                  |                                                             |    |                  |                          |    |                  |                    |    |                  |                                                                                        |
| 1   | Strongly Disagree                                                                                                      |                                                                                                              |                                                                                                                                                                                                                                                                                                                                                                                                                                                                                                                                                                                                                                                                                                                                                                                                                                                                                                                                                                                                                                                                                                                                                                                                                                                                                                                                                                                                                                                                                                                                                                                                                                                                                                                                                                                                                                                                                                                     |   |                   |                    |          |                 |                            |   |                 |                     |                |                 |                                                                                          |   |                 |                                                                    |   |                 |                                                                                    |   |                 |                                 |   |                 |                                                |   |                 |                                               |    |                  |                                                    |    |                  |                                               |    |                  |                                              |    |                  |                                                                                   |    |                  |                                                             |    |                  |                          |    |                  |                    |    |                  |                                                                                        |
| 2   | Disagree                                                                                                               |                                                                                                              |                                                                                                                                                                                                                                                                                                                                                                                                                                                                                                                                                                                                                                                                                                                                                                                                                                                                                                                                                                                                                                                                                                                                                                                                                                                                                                                                                                                                                                                                                                                                                                                                                                                                                                                                                                                                                                                                                                                     |   |                   |                    |          |                 |                            |   |                 |                     |                |                 |                                                                                          |   |                 |                                                                    |   |                 |                                                                                    |   |                 |                                 |   |                 |                                                |   |                 |                                               |    |                  |                                                    |    |                  |                                               |    |                  |                                              |    |                  |                                                                                   |    |                  |                                                             |    |                  |                          |    |                  |                    |    |                  |                                                                                        |
| 3   | Neither agree nor disagree                                                                                             |                                                                                                              |                                                                                                                                                                                                                                                                                                                                                                                                                                                                                                                                                                                                                                                                                                                                                                                                                                                                                                                                                                                                                                                                                                                                                                                                                                                                                                                                                                                                                                                                                                                                                                                                                                                                                                                                                                                                                                                                                                                     |   |                   |                    |          |                 |                            |   |                 |                     |                |                 |                                                                                          |   |                 |                                                                    |   |                 |                                                                                    |   |                 |                                 |   |                 |                                                |   |                 |                                               |    |                  |                                                    |    |                  |                                               |    |                  |                                              |    |                  |                                                                                   |    |                  |                                                             |    |                  |                          |    |                  |                    |    |                  |                                                                                        |
| 4   | Agree                                                                                                                  |                                                                                                              |                                                                                                                                                                                                                                                                                                                                                                                                                                                                                                                                                                                                                                                                                                                                                                                                                                                                                                                                                                                                                                                                                                                                                                                                                                                                                                                                                                                                                                                                                                                                                                                                                                                                                                                                                                                                                                                                                                                     |   |                   |                    |          |                 |                            |   |                 |                     |                |                 |                                                                                          |   |                 |                                                                    |   |                 |                                                                                    |   |                 |                                 |   |                 |                                                |   |                 |                                               |    |                  |                                                    |    |                  |                                               |    |                  |                                              |    |                  |                                                                                   |    |                  |                                                             |    |                  |                          |    |                  |                    |    |                  |                                                                                        |
| 5   | Strongly agree                                                                                                         |                                                                                                              |                                                                                                                                                                                                                                                                                                                                                                                                                                                                                                                                                                                                                                                                                                                                                                                                                                                                                                                                                                                                                                                                                                                                                                                                                                                                                                                                                                                                                                                                                                                                                                                                                                                                                                                                                                                                                                                                                                                     |   |                   |                    |          |                 |                            |   |                 |                     |                |                 |                                                                                          |   |                 |                                                                    |   |                 |                                                                                    |   |                 |                                 |   |                 |                                                |   |                 |                                               |    |                  |                                                    |    |                  |                                               |    |                  |                                              |    |                  |                                                                                   |    |                  |                                                             |    |                  |                          |    |                  |                    |    |                  |                                                                                        |
| 6   | I don't know                                                                                                           |                                                                                                              |                                                                                                                                                                                                                                                                                                                                                                                                                                                                                                                                                                                                                                                                                                                                                                                                                                                                                                                                                                                                                                                                                                                                                                                                                                                                                                                                                                                                                                                                                                                                                                                                                                                                                                                                                                                                                                                                                                                     |   |                   |                    |          |                 |                            |   |                 |                     |                |                 |                                                                                          |   |                 |                                                                    |   |                 |                                                                                    |   |                 |                                 |   |                 |                                                |   |                 |                                               |    |                  |                                                    |    |                  |                                               |    |                  |                                              |    |                  |                                                                                   |    |                  |                                                             |    |                  |                          |    |                  |                    |    |                  |                                                                                        |

|     |                                                                                                            |                                                                                                                           |                                                                                                                                                                           |
|-----|------------------------------------------------------------------------------------------------------------|---------------------------------------------------------------------------------------------------------------------------|---------------------------------------------------------------------------------------------------------------------------------------------------------------------------|
| 119 | mat_post_lib_v2<br>Afficher le champ UNIQUEM ENT si :<br>[pa_jumelage_v2] = '0' and [pa_nb_renc] = '2'     | I feel free to discuss all the subjects that preoccupy me during this/these meeting(s) with a patient advisor:            | radio (Matrice)<br>1 Strongly Disagree<br>2 Disagree<br>3 Neither agree nor disagree<br>4 Agree<br>5 Strongly agree<br>6 I don't know                                     |
| 120 | mat_post_complem_v2<br>Afficher le champ UNIQUEM ENT si :<br>[pa_jumelage_v2] = '0' and [pa_nb_renc] = '2' | This/these meeting(s) with a patient advisor is/are in complementarity with the interventions of my health professionals: | radio (Matrice)<br>1 Strongly Disagree<br>2 Disagree<br>3 Neither agree nor disagree<br>4 Agree<br>5 Strongly agree<br>6 I don't know                                     |
| 121 | pa_postacc_mat2_v2<br>Afficher le champ UNIQUEM ENT si :<br>[pa_jumelage_v2] = '0' and [pa_nb_renc] = '2'  | How satisfied are you with the following?                                                                                 | descriptive                                                                                                                                                               |
| 122 | mat_post_freq_v2<br>Afficher le champ UNIQUEM ENT si :<br>[pa_jumelage_v2] = '0' and [pa_nb_renc] = '2'    | The frequency of your exchanges with the patient advisor                                                                  | radio (Matrice)<br>1 Very dissatisfied<br>2 Somewhat dissatisfied<br>3 Neither satisfied nor dissatisfied<br>4 Somewhat satisfied<br>5 Very satisfied<br>6 Not applicable |
| 123 | mat_post_dur_v2<br>Afficher le champ UNIQUEM ENT si :<br>[pa_jumelage_v2] = '0' and [pa_nb_renc] = '2'     | The duration of your exchanges with the patient advisor                                                                   | radio (Matrice)<br>1 Very dissatisfied<br>2 Somewhat dissatisfied<br>3 Neither satisfied nor dissatisfied<br>4 Somewhat satisfied<br>5 Very satisfied<br>6 Not applicable |
| 124 | mat_post_adapt_v2<br>Afficher le champ UNIQUEM ENT si :<br>[pa_jumelage_v2] = '0' and [pa_nb_renc] = '2'   | The adaptation of physical spaces to exchanges (confidentiality...)                                                       | radio (Matrice)<br>1 Very dissatisfied<br>2 Somewhat dissatisfied<br>3 Neither satisfied nor dissatisfied<br>4 Somewhat satisfied<br>5 Very satisfied<br>6 Not applicable |
| 125 | mat_post_facil_v2<br>Afficher le champ UNIQUEM ENT si :<br>[pa_jumelage_v2] = '0' and [pa_nb_renc] = '2'   | Ease of access to the patient advisor when needed.                                                                        | radio (Matrice)<br>1 Very dissatisfied<br>2 Somewhat dissatisfied<br>3 Neither satisfied nor dissatisfied<br>4 Somewhat satisfied<br>5 Very satisfied<br>6 Not applicable |
| 126 | pa_recom_v2<br>Afficher le champ UNIQUEM ENT si :<br>[pa_jumelage_v2] = '0' and [pa_nb_renc] = '2'         | In the end, do you think this type of meeting would be interesting to deploy to help more patients and caregivers?        | radio<br>1 Yes, absolutely<br>2 Yes, but by reviewing some of the terms and conditions.<br>3 Rather not, it doesn't really matter<br>4 No, not at all                     |

|                                               |                                                                                 |                                                                                                                                                                                                                                                                                         |                                                                                                                                                                                                                |   |                   |   |            |   |          |   |                |
|-----------------------------------------------|---------------------------------------------------------------------------------|-----------------------------------------------------------------------------------------------------------------------------------------------------------------------------------------------------------------------------------------------------------------------------------------|----------------------------------------------------------------------------------------------------------------------------------------------------------------------------------------------------------------|---|-------------------|---|------------|---|----------|---|----------------|
| 127                                           | pa_recom_precis_v2<br>Afficher le champ UNIQUEM ENT si :<br>[pa_recom_v2] = '2' | Please specify these terms and conditions to be reviewed                                                                                                                                                                                                                                | text                                                                                                                                                                                                           |   |                   |   |            |   |          |   |                |
| 128                                           | patients_experience_with_pas_questionnaire2_complete                            | En-tête de section : <i>Form Status</i><br>Complete?                                                                                                                                                                                                                                    | dropdown<br><table border="1"> <tr><td>0</td><td>Incomplete</td></tr> <tr><td>1</td><td>Unverified</td></tr> <tr><td>2</td><td>Complete</td></tr> </table>                                                     | 0 | Incomplete        | 1 | Unverified | 2 | Complete |   |                |
| 0                                             | Incomplete                                                                      |                                                                                                                                                                                                                                                                                         |                                                                                                                                                                                                                |   |                   |   |            |   |          |   |                |
| 1                                             | Unverified                                                                      |                                                                                                                                                                                                                                                                                         |                                                                                                                                                                                                                |   |                   |   |            |   |          |   |                |
| 2                                             | Complete                                                                        |                                                                                                                                                                                                                                                                                         |                                                                                                                                                                                                                |   |                   |   |            |   |          |   |                |
| Formulaire : <b>CASE and K6</b> (case_and_k6) |                                                                                 |                                                                                                                                                                                                                                                                                         | <a href="#">^ Collapse</a>                                                                                                                                                                                     |   |                   |   |            |   |          |   |                |
| 129                                           | pa_caseface_v2_v2                                                               | En-tête de section : <i>ABILITY TO COPE WITH CANCER Please indicate the extent to which you disagree or agree with the following statements by checking the answer that best describes you at this time.</i><br><br>I am confident that I can deal with any unexpected health problems. | radio (Matrice)<br><table border="1"> <tr><td>1</td><td>Strongly Disagree</td></tr> <tr><td>2</td><td>Disagree</td></tr> <tr><td>3</td><td>Agree</td></tr> <tr><td>4</td><td>Strongly agree</td></tr> </table> | 1 | Strongly Disagree | 2 | Disagree   | 3 | Agree    | 4 | Strongly agree |
| 1                                             | Strongly Disagree                                                               |                                                                                                                                                                                                                                                                                         |                                                                                                                                                                                                                |   |                   |   |            |   |          |   |                |
| 2                                             | Disagree                                                                        |                                                                                                                                                                                                                                                                                         |                                                                                                                                                                                                                |   |                   |   |            |   |          |   |                |
| 3                                             | Agree                                                                           |                                                                                                                                                                                                                                                                                         |                                                                                                                                                                                                                |   |                   |   |            |   |          |   |                |
| 4                                             | Strongly agree                                                                  |                                                                                                                                                                                                                                                                                         |                                                                                                                                                                                                                |   |                   |   |            |   |          |   |                |
| 130                                           | pa_caseecrit_v2_v2                                                              | I am confident in my ability to understand written information about cancer.                                                                                                                                                                                                            | radio (Matrice)<br><table border="1"> <tr><td>1</td><td>Strongly Disagree</td></tr> <tr><td>2</td><td>Disagree</td></tr> <tr><td>3</td><td>Agree</td></tr> <tr><td>4</td><td>Strongly agree</td></tr> </table> | 1 | Strongly Disagree | 2 | Disagree   | 3 | Agree    | 4 | Strongly agree |
| 1                                             | Strongly Disagree                                                               |                                                                                                                                                                                                                                                                                         |                                                                                                                                                                                                                |   |                   |   |            |   |          |   |                |
| 2                                             | Disagree                                                                        |                                                                                                                                                                                                                                                                                         |                                                                                                                                                                                                                |   |                   |   |            |   |          |   |                |
| 3                                             | Agree                                                                           |                                                                                                                                                                                                                                                                                         |                                                                                                                                                                                                                |   |                   |   |            |   |          |   |                |
| 4                                             | Strongly agree                                                                  |                                                                                                                                                                                                                                                                                         |                                                                                                                                                                                                                |   |                   |   |            |   |          |   |                |
| 131                                           | pa_casemd_v2_v2                                                                 | I am confident in my ability to understand the instructions of my doctor(s).                                                                                                                                                                                                            | radio (Matrice)<br><table border="1"> <tr><td>1</td><td>Strongly Disagree</td></tr> <tr><td>2</td><td>Disagree</td></tr> <tr><td>3</td><td>Agree</td></tr> <tr><td>4</td><td>Strongly agree</td></tr> </table> | 1 | Strongly Disagree | 2 | Disagree   | 3 | Agree    | 4 | Strongly agree |
| 1                                             | Strongly Disagree                                                               |                                                                                                                                                                                                                                                                                         |                                                                                                                                                                                                                |   |                   |   |            |   |          |   |                |
| 2                                             | Disagree                                                                        |                                                                                                                                                                                                                                                                                         |                                                                                                                                                                                                                |   |                   |   |            |   |          |   |                |
| 3                                             | Agree                                                                           |                                                                                                                                                                                                                                                                                         |                                                                                                                                                                                                                |   |                   |   |            |   |          |   |                |
| 4                                             | Strongly agree                                                                  |                                                                                                                                                                                                                                                                                         |                                                                                                                                                                                                                |   |                   |   |            |   |          |   |                |
| 132                                           | pa_caseparti_v2_v2                                                              | I know that I will be able to actively participate in decisions about my treatments.                                                                                                                                                                                                    | radio (Matrice)<br><table border="1"> <tr><td>1</td><td>Strongly Disagree</td></tr> <tr><td>2</td><td>Disagree</td></tr> <tr><td>3</td><td>Agree</td></tr> <tr><td>4</td><td>Strongly agree</td></tr> </table> | 1 | Strongly Disagree | 2 | Disagree   | 3 | Agree    | 4 | Strongly agree |
| 1                                             | Strongly Disagree                                                               |                                                                                                                                                                                                                                                                                         |                                                                                                                                                                                                                |   |                   |   |            |   |          |   |                |
| 2                                             | Disagree                                                                        |                                                                                                                                                                                                                                                                                         |                                                                                                                                                                                                                |   |                   |   |            |   |          |   |                |
| 3                                             | Agree                                                                           |                                                                                                                                                                                                                                                                                         |                                                                                                                                                                                                                |   |                   |   |            |   |          |   |                |
| 4                                             | Strongly agree                                                                  |                                                                                                                                                                                                                                                                                         |                                                                                                                                                                                                                |   |                   |   |            |   |          |   |                |
| 133                                           | pa_casedecou_v2_v2                                                              | I will not be discouraged by cancer.                                                                                                                                                                                                                                                    | radio (Matrice)<br><table border="1"> <tr><td>1</td><td>Strongly Disagree</td></tr> <tr><td>2</td><td>Disagree</td></tr> <tr><td>3</td><td>Agree</td></tr> <tr><td>4</td><td>Strongly agree</td></tr> </table> | 1 | Strongly Disagree | 2 | Disagree   | 3 | Agree    | 4 | Strongly agree |
| 1                                             | Strongly Disagree                                                               |                                                                                                                                                                                                                                                                                         |                                                                                                                                                                                                                |   |                   |   |            |   |          |   |                |
| 2                                             | Disagree                                                                        |                                                                                                                                                                                                                                                                                         |                                                                                                                                                                                                                |   |                   |   |            |   |          |   |                |
| 3                                             | Agree                                                                           |                                                                                                                                                                                                                                                                                         |                                                                                                                                                                                                                |   |                   |   |            |   |          |   |                |
| 4                                             | Strongly agree                                                                  |                                                                                                                                                                                                                                                                                         |                                                                                                                                                                                                                |   |                   |   |            |   |          |   |                |
| 134                                           | pa_caseatti_v2_v2                                                               | It's easy for me to keep a positive attitude.                                                                                                                                                                                                                                           | radio (Matrice)<br><table border="1"> <tr><td>1</td><td>Strongly Disagree</td></tr> <tr><td>2</td><td>Disagree</td></tr> <tr><td>3</td><td>Agree</td></tr> <tr><td>4</td><td>Strongly agree</td></tr> </table> | 1 | Strongly Disagree | 2 | Disagree   | 3 | Agree    | 4 | Strongly agree |
| 1                                             | Strongly Disagree                                                               |                                                                                                                                                                                                                                                                                         |                                                                                                                                                                                                                |   |                   |   |            |   |          |   |                |
| 2                                             | Disagree                                                                        |                                                                                                                                                                                                                                                                                         |                                                                                                                                                                                                                |   |                   |   |            |   |          |   |                |
| 3                                             | Agree                                                                           |                                                                                                                                                                                                                                                                                         |                                                                                                                                                                                                                |   |                   |   |            |   |          |   |                |
| 4                                             | Strongly agree                                                                  |                                                                                                                                                                                                                                                                                         |                                                                                                                                                                                                                |   |                   |   |            |   |          |   |                |
| 135                                           | pa_casehumou_v2_v2                                                              | It's easy for me to keep a sense of humor.                                                                                                                                                                                                                                              | radio (Matrice)<br><table border="1"> <tr><td>1</td><td>Strongly Disagree</td></tr> <tr><td>2</td><td>Disagree</td></tr> <tr><td>3</td><td>Agree</td></tr> <tr><td>4</td><td>Strongly agree</td></tr> </table> | 1 | Strongly Disagree | 2 | Disagree   | 3 | Agree    | 4 | Strongly agree |
| 1                                             | Strongly Disagree                                                               |                                                                                                                                                                                                                                                                                         |                                                                                                                                                                                                                |   |                   |   |            |   |          |   |                |
| 2                                             | Disagree                                                                        |                                                                                                                                                                                                                                                                                         |                                                                                                                                                                                                                |   |                   |   |            |   |          |   |                |
| 3                                             | Agree                                                                           |                                                                                                                                                                                                                                                                                         |                                                                                                                                                                                                                |   |                   |   |            |   |          |   |                |
| 4                                             | Strongly agree                                                                  |                                                                                                                                                                                                                                                                                         |                                                                                                                                                                                                                |   |                   |   |            |   |          |   |                |
| 136                                           | pa_casesenti_v2_v2                                                              | I feel confident that I can control my negative feelings about cancer.                                                                                                                                                                                                                  | radio (Matrice)<br><table border="1"> <tr><td>1</td><td>Strongly Disagree</td></tr> <tr><td>2</td><td>Disagree</td></tr> <tr><td>3</td><td>Agree</td></tr> <tr><td>4</td><td>Strongly agree</td></tr> </table> | 1 | Strongly Disagree | 2 | Disagree   | 3 | Agree    | 4 | Strongly agree |
| 1                                             | Strongly Disagree                                                               |                                                                                                                                                                                                                                                                                         |                                                                                                                                                                                                                |   |                   |   |            |   |          |   |                |
| 2                                             | Disagree                                                                        |                                                                                                                                                                                                                                                                                         |                                                                                                                                                                                                                |   |                   |   |            |   |          |   |                |
| 3                                             | Agree                                                                           |                                                                                                                                                                                                                                                                                         |                                                                                                                                                                                                                |   |                   |   |            |   |          |   |                |
| 4                                             | Strongly agree                                                                  |                                                                                                                                                                                                                                                                                         |                                                                                                                                                                                                                |   |                   |   |            |   |          |   |                |

|     |                      |                                                                                                          |                                                                                                                                                                                                                                                                                    |   |                   |   |                  |   |                  |   |                      |   |                  |
|-----|----------------------|----------------------------------------------------------------------------------------------------------|------------------------------------------------------------------------------------------------------------------------------------------------------------------------------------------------------------------------------------------------------------------------------------|---|-------------------|---|------------------|---|------------------|---|----------------------|---|------------------|
| 137 | pa_casedeman_v2_v2   | If I don't understand something, it's easy for me to ask for help.                                       | radio (Matrice)<br><table border="1"> <tr><td>1</td><td>Strongly Disagree</td></tr> <tr><td>2</td><td>Disagree</td></tr> <tr><td>3</td><td>Agree</td></tr> <tr><td>4</td><td>Strongly agree</td></tr> </table>                                                                     | 1 | Strongly Disagree | 2 | Disagree         | 3 | Agree            | 4 | Strongly agree       |   |                  |
| 1   | Strongly Disagree    |                                                                                                          |                                                                                                                                                                                                                                                                                    |   |                   |   |                  |   |                  |   |                      |   |                  |
| 2   | Disagree             |                                                                                                          |                                                                                                                                                                                                                                                                                    |   |                   |   |                  |   |                  |   |                      |   |                  |
| 3   | Agree                |                                                                                                          |                                                                                                                                                                                                                                                                                    |   |                   |   |                  |   |                  |   |                      |   |                  |
| 4   | Strongly agree       |                                                                                                          |                                                                                                                                                                                                                                                                                    |   |                   |   |                  |   |                  |   |                      |   |                  |
| 138 | pa_caseposer_v2_v2   | It's easy for me to ask the nurse(s) questions.                                                          | radio (Matrice)<br><table border="1"> <tr><td>1</td><td>Strongly Disagree</td></tr> <tr><td>2</td><td>Disagree</td></tr> <tr><td>3</td><td>Agree</td></tr> <tr><td>4</td><td>Strongly agree</td></tr> </table>                                                                     | 1 | Strongly Disagree | 2 | Disagree         | 3 | Agree            | 4 | Strongly agree       |   |                  |
| 1   | Strongly Disagree    |                                                                                                          |                                                                                                                                                                                                                                                                                    |   |                   |   |                  |   |                  |   |                      |   |                  |
| 2   | Disagree             |                                                                                                          |                                                                                                                                                                                                                                                                                    |   |                   |   |                  |   |                  |   |                      |   |                  |
| 3   | Agree                |                                                                                                          |                                                                                                                                                                                                                                                                                    |   |                   |   |                  |   |                  |   |                      |   |                  |
| 4   | Strongly agree       |                                                                                                          |                                                                                                                                                                                                                                                                                    |   |                   |   |                  |   |                  |   |                      |   |                  |
| 139 | pa_caseques_v2_v2    | It's easy for me to ask my doctor(s) questions.                                                          | radio (Matrice)<br><table border="1"> <tr><td>1</td><td>Strongly Disagree</td></tr> <tr><td>2</td><td>Disagree</td></tr> <tr><td>3</td><td>Agree</td></tr> <tr><td>4</td><td>Strongly agree</td></tr> </table>                                                                     | 1 | Strongly Disagree | 2 | Disagree         | 3 | Agree            | 4 | Strongly agree       |   |                  |
| 1   | Strongly Disagree    |                                                                                                          |                                                                                                                                                                                                                                                                                    |   |                   |   |                  |   |                  |   |                      |   |                  |
| 2   | Disagree             |                                                                                                          |                                                                                                                                                                                                                                                                                    |   |                   |   |                  |   |                  |   |                      |   |                  |
| 3   | Agree                |                                                                                                          |                                                                                                                                                                                                                                                                                    |   |                   |   |                  |   |                  |   |                      |   |                  |
| 4   | Strongly agree       |                                                                                                          |                                                                                                                                                                                                                                                                                    |   |                   |   |                  |   |                  |   |                      |   |                  |
| 140 | pa_caseobte_v2_v2    | It's easy for me to get information about cancer.                                                        | radio (Matrice)<br><table border="1"> <tr><td>1</td><td>Strongly Disagree</td></tr> <tr><td>2</td><td>Disagree</td></tr> <tr><td>3</td><td>Agree</td></tr> <tr><td>4</td><td>Strongly agree</td></tr> </table>                                                                     | 1 | Strongly Disagree | 2 | Disagree         | 3 | Agree            | 4 | Strongly agree       |   |                  |
| 1   | Strongly Disagree    |                                                                                                          |                                                                                                                                                                                                                                                                                    |   |                   |   |                  |   |                  |   |                      |   |                  |
| 2   | Disagree             |                                                                                                          |                                                                                                                                                                                                                                                                                    |   |                   |   |                  |   |                  |   |                      |   |                  |
| 3   | Agree                |                                                                                                          |                                                                                                                                                                                                                                                                                    |   |                   |   |                  |   |                  |   |                      |   |                  |
| 4   | Strongly agree       |                                                                                                          |                                                                                                                                                                                                                                                                                    |   |                   |   |                  |   |                  |   |                      |   |                  |
| 141 | pa_k6nerv_v2_v2      | En-tête de section : <i>YOUR EMOTIONAL STATE</i><br>In the last 30 days, how often did you feel nervous? | radio (Matrice)<br><table border="1"> <tr><td>1</td><td>All of the time</td></tr> <tr><td>2</td><td>Most of the time</td></tr> <tr><td>3</td><td>Some of the time</td></tr> <tr><td>4</td><td>A little of the time</td></tr> <tr><td>5</td><td>None of the time</td></tr> </table> | 1 | All of the time   | 2 | Most of the time | 3 | Some of the time | 4 | A little of the time | 5 | None of the time |
| 1   | All of the time      |                                                                                                          |                                                                                                                                                                                                                                                                                    |   |                   |   |                  |   |                  |   |                      |   |                  |
| 2   | Most of the time     |                                                                                                          |                                                                                                                                                                                                                                                                                    |   |                   |   |                  |   |                  |   |                      |   |                  |
| 3   | Some of the time     |                                                                                                          |                                                                                                                                                                                                                                                                                    |   |                   |   |                  |   |                  |   |                      |   |                  |
| 4   | A little of the time |                                                                                                          |                                                                                                                                                                                                                                                                                    |   |                   |   |                  |   |                  |   |                      |   |                  |
| 5   | None of the time     |                                                                                                          |                                                                                                                                                                                                                                                                                    |   |                   |   |                  |   |                  |   |                      |   |                  |
| 142 | pa_k6deses_v2_v2     | In the past 30 days, how often did you feel hopeless?                                                    | radio (Matrice)<br><table border="1"> <tr><td>1</td><td>All of the time</td></tr> <tr><td>2</td><td>Most of the time</td></tr> <tr><td>3</td><td>Some of the time</td></tr> <tr><td>4</td><td>A little of the time</td></tr> <tr><td>5</td><td>None of the time</td></tr> </table> | 1 | All of the time   | 2 | Most of the time | 3 | Some of the time | 4 | A little of the time | 5 | None of the time |
| 1   | All of the time      |                                                                                                          |                                                                                                                                                                                                                                                                                    |   |                   |   |                  |   |                  |   |                      |   |                  |
| 2   | Most of the time     |                                                                                                          |                                                                                                                                                                                                                                                                                    |   |                   |   |                  |   |                  |   |                      |   |                  |
| 3   | Some of the time     |                                                                                                          |                                                                                                                                                                                                                                                                                    |   |                   |   |                  |   |                  |   |                      |   |                  |
| 4   | A little of the time |                                                                                                          |                                                                                                                                                                                                                                                                                    |   |                   |   |                  |   |                  |   |                      |   |                  |
| 5   | None of the time     |                                                                                                          |                                                                                                                                                                                                                                                                                    |   |                   |   |                  |   |                  |   |                      |   |                  |
| 143 | pa_k6agite_v2_v2     | In the past 30 days, how often did you feel restless or fidgety?                                         | radio (Matrice)<br><table border="1"> <tr><td>1</td><td>All of the time</td></tr> <tr><td>2</td><td>Most of the time</td></tr> <tr><td>3</td><td>Some of the time</td></tr> <tr><td>4</td><td>A little of the time</td></tr> <tr><td>5</td><td>None of the time</td></tr> </table> | 1 | All of the time   | 2 | Most of the time | 3 | Some of the time | 4 | A little of the time | 5 | None of the time |
| 1   | All of the time      |                                                                                                          |                                                                                                                                                                                                                                                                                    |   |                   |   |                  |   |                  |   |                      |   |                  |
| 2   | Most of the time     |                                                                                                          |                                                                                                                                                                                                                                                                                    |   |                   |   |                  |   |                  |   |                      |   |                  |
| 3   | Some of the time     |                                                                                                          |                                                                                                                                                                                                                                                                                    |   |                   |   |                  |   |                  |   |                      |   |                  |
| 4   | A little of the time |                                                                                                          |                                                                                                                                                                                                                                                                                    |   |                   |   |                  |   |                  |   |                      |   |                  |
| 5   | None of the time     |                                                                                                          |                                                                                                                                                                                                                                                                                    |   |                   |   |                  |   |                  |   |                      |   |                  |
| 144 | pa_k6sourire_v2_v2   | In the past 30 days, how often did you feel so depressed that nothing could cheer you up?                | radio (Matrice)<br><table border="1"> <tr><td>1</td><td>All of the time</td></tr> <tr><td>2</td><td>Most of the time</td></tr> <tr><td>3</td><td>Some of the time</td></tr> <tr><td>4</td><td>A little of the time</td></tr> <tr><td>5</td><td>None of the time</td></tr> </table> | 1 | All of the time   | 2 | Most of the time | 3 | Some of the time | 4 | A little of the time | 5 | None of the time |
| 1   | All of the time      |                                                                                                          |                                                                                                                                                                                                                                                                                    |   |                   |   |                  |   |                  |   |                      |   |                  |
| 2   | Most of the time     |                                                                                                          |                                                                                                                                                                                                                                                                                    |   |                   |   |                  |   |                  |   |                      |   |                  |
| 3   | Some of the time     |                                                                                                          |                                                                                                                                                                                                                                                                                    |   |                   |   |                  |   |                  |   |                      |   |                  |
| 4   | A little of the time |                                                                                                          |                                                                                                                                                                                                                                                                                    |   |                   |   |                  |   |                  |   |                      |   |                  |
| 5   | None of the time     |                                                                                                          |                                                                                                                                                                                                                                                                                    |   |                   |   |                  |   |                  |   |                      |   |                  |
| 145 | pa_k6effort_v2_v2    | In the last 30 days, how often did you feel everything was an effort?                                    | radio (Matrice)<br><table border="1"> <tr><td>1</td><td>All of the time</td></tr> <tr><td>2</td><td>Most of the time</td></tr> <tr><td>3</td><td>Some of the time</td></tr> <tr><td>4</td><td>A little of the time</td></tr> <tr><td>5</td><td>None of the time</td></tr> </table> | 1 | All of the time   | 2 | Most of the time | 3 | Some of the time | 4 | A little of the time | 5 | None of the time |
| 1   | All of the time      |                                                                                                          |                                                                                                                                                                                                                                                                                    |   |                   |   |                  |   |                  |   |                      |   |                  |
| 2   | Most of the time     |                                                                                                          |                                                                                                                                                                                                                                                                                    |   |                   |   |                  |   |                  |   |                      |   |                  |
| 3   | Some of the time     |                                                                                                          |                                                                                                                                                                                                                                                                                    |   |                   |   |                  |   |                  |   |                      |   |                  |
| 4   | A little of the time |                                                                                                          |                                                                                                                                                                                                                                                                                    |   |                   |   |                  |   |                  |   |                      |   |                  |
| 5   | None of the time     |                                                                                                          |                                                                                                                                                                                                                                                                                    |   |                   |   |                  |   |                  |   |                      |   |                  |

|     |                      |                                                        |                                                                                                                                                                                                                                                                                 |   |                 |   |                  |   |                  |   |                      |   |                  |
|-----|----------------------|--------------------------------------------------------|---------------------------------------------------------------------------------------------------------------------------------------------------------------------------------------------------------------------------------------------------------------------------------|---|-----------------|---|------------------|---|------------------|---|----------------------|---|------------------|
| 146 | pa_k6rien_v2_v2      | In the last 30 days, how often did you feel worthless? | radio (Matrice) <table border="1"> <tr><td>1</td><td>All of the time</td></tr> <tr><td>2</td><td>Most of the time</td></tr> <tr><td>3</td><td>Some of the time</td></tr> <tr><td>4</td><td>A little of the time</td></tr> <tr><td>5</td><td>None of the time</td></tr> </table> | 1 | All of the time | 2 | Most of the time | 3 | Some of the time | 4 | A little of the time | 5 | None of the time |
| 1   | All of the time      |                                                        |                                                                                                                                                                                                                                                                                 |   |                 |   |                  |   |                  |   |                      |   |                  |
| 2   | Most of the time     |                                                        |                                                                                                                                                                                                                                                                                 |   |                 |   |                  |   |                  |   |                      |   |                  |
| 3   | Some of the time     |                                                        |                                                                                                                                                                                                                                                                                 |   |                 |   |                  |   |                  |   |                      |   |                  |
| 4   | A little of the time |                                                        |                                                                                                                                                                                                                                                                                 |   |                 |   |                  |   |                  |   |                      |   |                  |
| 5   | None of the time     |                                                        |                                                                                                                                                                                                                                                                                 |   |                 |   |                  |   |                  |   |                      |   |                  |
| 147 | case_and_k6_complete | En-tête de section : <i>Form Status</i><br>Complete?   | dropdown <table border="1"> <tr><td>0</td><td>Incomplete</td></tr> <tr><td>1</td><td>Unverified</td></tr> <tr><td>2</td><td>Complete</td></tr> </table>                                                                                                                         | 0 | Incomplete      | 1 | Unverified       | 2 | Complete         |   |                      |   |                  |
| 0   | Incomplete           |                                                        |                                                                                                                                                                                                                                                                                 |   |                 |   |                  |   |                  |   |                      |   |                  |
| 1   | Unverified           |                                                        |                                                                                                                                                                                                                                                                                 |   |                 |   |                  |   |                  |   |                      |   |                  |
| 2   | Complete             |                                                        |                                                                                                                                                                                                                                                                                 |   |                 |   |                  |   |                  |   |                      |   |                  |

Formulaire : **Treatment adherence questionnaire** (treatment\_adherence\_questionnaire)

[^ Collapse](#)

|     |                                                                                                    |                                                                                                                                                                                                                                              |                                                                                                                                                                                                                                                                    |   |                           |   |                       |   |                            |   |       |   |                |
|-----|----------------------------------------------------------------------------------------------------|----------------------------------------------------------------------------------------------------------------------------------------------------------------------------------------------------------------------------------------------|--------------------------------------------------------------------------------------------------------------------------------------------------------------------------------------------------------------------------------------------------------------------|---|---------------------------|---|-----------------------|---|----------------------------|---|-------|---|----------------|
| 148 | pa_traitement                                                                                      | At the time of completing this questionnaire, which stage best describes where you are in your cancer care?                                                                                                                                  | radio <table border="1"> <tr><td>1</td><td>Before starting treatment</td></tr> <tr><td>2</td><td>Treatment in progress</td></tr> <tr><td>3</td><td>Treatment completed</td></tr> </table><br>Alignement personnalisé : LV                                          | 1 | Before starting treatment | 2 | Treatment in progress | 3 | Treatment completed        |   |       |   |                |
| 1   | Before starting treatment                                                                          |                                                                                                                                                                                                                                              |                                                                                                                                                                                                                                                                    |   |                           |   |                       |   |                            |   |       |   |                |
| 2   | Treatment in progress                                                                              |                                                                                                                                                                                                                                              |                                                                                                                                                                                                                                                                    |   |                           |   |                       |   |                            |   |       |   |                |
| 3   | Treatment completed                                                                                |                                                                                                                                                                                                                                              |                                                                                                                                                                                                                                                                    |   |                           |   |                       |   |                            |   |       |   |                |
| 149 | bidon54<br>Afficher le champ UNIQUEM<br>ENT si :<br>[pa_traitement] = '1' OR [pa_traitement] = '3' | Since you are not currently undergoing treatment, you do not have to answer this questionnaire. Thank you for your participation.                                                                                                            | descriptive                                                                                                                                                                                                                                                        |   |                           |   |                       |   |                            |   |       |   |                |
| 150 | bidon_55<br>Afficher le champ UNIQUEM<br>ENT si :<br>[pa_traitement] = '2'                         | YOUR ADHERENCE TO YOUR TREATMENTS<br><br>The questions below relate to your treatments. Please indicate the extent to which you disagree or agree with the following statements by checking the answer that best describes you at this time. | descriptive                                                                                                                                                                                                                                                        |   |                           |   |                       |   |                            |   |       |   |                |
| 151 | pa_adheenga2<br>Afficher le champ UNIQUEM<br>ENT si :<br>[pa_traitement] = '2'                     | I have made a commitment to follow my treatment plan.                                                                                                                                                                                        | radio (Matrice) <table border="1"> <tr><td>1</td><td>Strongly disagree</td></tr> <tr><td>2</td><td>Disagree</td></tr> <tr><td>3</td><td>Neither agree nor disagree</td></tr> <tr><td>4</td><td>Agree</td></tr> <tr><td>5</td><td>Strongly agree</td></tr> </table> | 1 | Strongly disagree         | 2 | Disagree              | 3 | Neither agree nor disagree | 4 | Agree | 5 | Strongly agree |
| 1   | Strongly disagree                                                                                  |                                                                                                                                                                                                                                              |                                                                                                                                                                                                                                                                    |   |                           |   |                       |   |                            |   |       |   |                |
| 2   | Disagree                                                                                           |                                                                                                                                                                                                                                              |                                                                                                                                                                                                                                                                    |   |                           |   |                       |   |                            |   |       |   |                |
| 3   | Neither agree nor disagree                                                                         |                                                                                                                                                                                                                                              |                                                                                                                                                                                                                                                                    |   |                           |   |                       |   |                            |   |       |   |                |
| 4   | Agree                                                                                              |                                                                                                                                                                                                                                              |                                                                                                                                                                                                                                                                    |   |                           |   |                       |   |                            |   |       |   |                |
| 5   | Strongly agree                                                                                     |                                                                                                                                                                                                                                              |                                                                                                                                                                                                                                                                    |   |                           |   |                       |   |                            |   |       |   |                |
| 152 | pa_adheplan2<br>Afficher le champ UNIQUEM<br>ENT si :<br>[pa_traitement] = '2'                     | Following my treatment plan is not in my plans.                                                                                                                                                                                              | radio (Matrice) <table border="1"> <tr><td>1</td><td>Strongly disagree</td></tr> <tr><td>2</td><td>Disagree</td></tr> <tr><td>3</td><td>Neither agree nor disagree</td></tr> <tr><td>4</td><td>Agree</td></tr> <tr><td>5</td><td>Strongly agree</td></tr> </table> | 1 | Strongly disagree         | 2 | Disagree              | 3 | Neither agree nor disagree | 4 | Agree | 5 | Strongly agree |
| 1   | Strongly disagree                                                                                  |                                                                                                                                                                                                                                              |                                                                                                                                                                                                                                                                    |   |                           |   |                       |   |                            |   |       |   |                |
| 2   | Disagree                                                                                           |                                                                                                                                                                                                                                              |                                                                                                                                                                                                                                                                    |   |                           |   |                       |   |                            |   |       |   |                |
| 3   | Neither agree nor disagree                                                                         |                                                                                                                                                                                                                                              |                                                                                                                                                                                                                                                                    |   |                           |   |                       |   |                            |   |       |   |                |
| 4   | Agree                                                                                              |                                                                                                                                                                                                                                              |                                                                                                                                                                                                                                                                    |   |                           |   |                       |   |                            |   |       |   |                |
| 5   | Strongly agree                                                                                     |                                                                                                                                                                                                                                              |                                                                                                                                                                                                                                                                    |   |                           |   |                       |   |                            |   |       |   |                |
| 153 | pa_adheinten2<br>Afficher le champ UNIQUEM<br>ENT si :<br>[pa_traitement] = '2'                    | I intend to follow my treatment plan.                                                                                                                                                                                                        | radio (Matrice) <table border="1"> <tr><td>1</td><td>Strongly disagree</td></tr> <tr><td>2</td><td>Disagree</td></tr> <tr><td>3</td><td>Neither agree nor disagree</td></tr> <tr><td>4</td><td>Agree</td></tr> <tr><td>5</td><td>Strongly agree</td></tr> </table> | 1 | Strongly disagree         | 2 | Disagree              | 3 | Neither agree nor disagree | 4 | Agree | 5 | Strongly agree |
| 1   | Strongly disagree                                                                                  |                                                                                                                                                                                                                                              |                                                                                                                                                                                                                                                                    |   |                           |   |                       |   |                            |   |       |   |                |
| 2   | Disagree                                                                                           |                                                                                                                                                                                                                                              |                                                                                                                                                                                                                                                                    |   |                           |   |                       |   |                            |   |       |   |                |
| 3   | Neither agree nor disagree                                                                         |                                                                                                                                                                                                                                              |                                                                                                                                                                                                                                                                    |   |                           |   |                       |   |                            |   |       |   |                |
| 4   | Agree                                                                                              |                                                                                                                                                                                                                                              |                                                                                                                                                                                                                                                                    |   |                           |   |                       |   |                            |   |       |   |                |
| 5   | Strongly agree                                                                                     |                                                                                                                                                                                                                                              |                                                                                                                                                                                                                                                                    |   |                           |   |                       |   |                            |   |       |   |                |
| 154 | pa_adhepainten2<br>Afficher le champ UNIQUEM<br>ENT si :<br>[pa_traitement] = '2'                  | I have no intention of following my treatment plan.                                                                                                                                                                                          | radio (Matrice) <table border="1"> <tr><td>1</td><td>Strongly disagree</td></tr> <tr><td>2</td><td>Disagree</td></tr> <tr><td>3</td><td>Neither agree nor disagree</td></tr> <tr><td>4</td><td>Agree</td></tr> <tr><td>5</td><td>Strongly agree</td></tr> </table> | 1 | Strongly disagree         | 2 | Disagree              | 3 | Neither agree nor disagree | 4 | Agree | 5 | Strongly agree |
| 1   | Strongly disagree                                                                                  |                                                                                                                                                                                                                                              |                                                                                                                                                                                                                                                                    |   |                           |   |                       |   |                            |   |       |   |                |
| 2   | Disagree                                                                                           |                                                                                                                                                                                                                                              |                                                                                                                                                                                                                                                                    |   |                           |   |                       |   |                            |   |       |   |                |
| 3   | Neither agree nor disagree                                                                         |                                                                                                                                                                                                                                              |                                                                                                                                                                                                                                                                    |   |                           |   |                       |   |                            |   |       |   |                |
| 4   | Agree                                                                                              |                                                                                                                                                                                                                                              |                                                                                                                                                                                                                                                                    |   |                           |   |                       |   |                            |   |       |   |                |
| 5   | Strongly agree                                                                                     |                                                                                                                                                                                                                                              |                                                                                                                                                                                                                                                                    |   |                           |   |                       |   |                            |   |       |   |                |
| 155 | pa_bidon52<br>Afficher le champ UNIQUEM<br>ENT si :<br>[pa_traitement] = '2'                       | Please indicate the extent to which you disagree or agree with the following statements by checking the answer that best describes you at this time.                                                                                         | descriptive                                                                                                                                                                                                                                                        |   |                           |   |                       |   |                            |   |       |   |                |

|     |                                                                              |                                                                     |                                                                                                                     |
|-----|------------------------------------------------------------------------------|---------------------------------------------------------------------|---------------------------------------------------------------------------------------------------------------------|
| 156 | pa_adheempe2<br>Afficher le champ UNIQUEMENT si :<br>[pa_traitement] = '2'   | Lots of things get in the way of following my treatment plan.       | radio (Matrice)<br>1 Strongly disagree<br>2 Disagree<br>3 Neither agree nor disagree<br>4 Agree<br>5 Strongly agree |
| 157 | pa_adhebesoin2<br>Afficher le champ UNIQUEMENT si :<br>[pa_traitement] = '2' | I need more assistance in order to follow my treatment plan.        | radio (Matrice)<br>1 Strongly disagree<br>2 Disagree<br>3 Neither agree nor disagree<br>4 Agree<br>5 Strongly agree |
| 158 | pa_adheaide2<br>Afficher le champ UNIQUEMENT si :<br>[pa_traitement] = '2'   | I get the help I need to carry out my treatment plan.               | radio (Matrice)<br>1 Strongly disagree<br>2 Disagree<br>3 Neither agree nor disagree<br>4 Agree<br>5 Strongly agree |
| 159 | pa_adhecapa2<br>Afficher le champ UNIQUEMENT si :<br>[pa_traitement] = '2'   | I am able to deal with any problems in following my treatment plan. | radio (Matrice)<br>1 Strongly disagree<br>2 Disagree<br>3 Neither agree nor disagree<br>4 Agree<br>5 Strongly agree |
| 160 | treatment_adherence_questionnaire_complete                                   | En-tête de section : <i>Form Status</i><br>Complete?                | dropdown<br>0 Incomplete<br>1 Unverified<br>2 Complete                                                              |

Formulaire : **Accompaniment** (accompagnement)

▼ Expand

Formulaire : **Focus group** (focus\_group)

▼ Expand

Formulaire : **Interview** (interview)

▼ Expand

Formulaire : **End-of-study status** (endofstudy\_status)

▼ Expand

Formulaire : **Focus group general form** (focus\_group\_general\_form)

▼ Expand
