# Supplementary material
Source: PubMed Central journal article supplement (PMC7780394)
Supplement: 12913_2020_6009_MOESM5_ESM.pdf [file 12913_2020_6009_MOESM5_ESM.pdf]

# PAROLE-Onco-2-Patient accompagnateur-English

Guide des codes ▾

## Code du dictionnaire de données

09-10-2020 21:10

^ Collapse all instruments

| #                                                                                                                                    | Nom de variable/champ                                                                             | Étiquette de champ<br><i>Note de champ</i>                             | Attributs de champ (type de champ, validation, choix, logique de branchement, calculs, etc.)                                                                                                                                                                                                                                                                                                       |   |                        |   |                     |   |                    |   |                 |   |                 |   |                 |   |                       |
|--------------------------------------------------------------------------------------------------------------------------------------|---------------------------------------------------------------------------------------------------|------------------------------------------------------------------------|----------------------------------------------------------------------------------------------------------------------------------------------------------------------------------------------------------------------------------------------------------------------------------------------------------------------------------------------------------------------------------------------------|---|------------------------|---|---------------------|---|--------------------|---|-----------------|---|-----------------|---|-----------------|---|-----------------------|
| Formulaire : <b>Formulaire d'identification des participants</b> (formulaire_didentification_des_participants) <span>▾ Expand</span> |                                                                                                   |                                                                        |                                                                                                                                                                                                                                                                                                                                                                                                    |   |                        |   |                     |   |                    |   |                 |   |                 |   |                 |   |                       |
| Formulaire : <b>Consentement abrégé</b> (consentement_abrg) <span>▾ Expand</span>                                                    |                                                                                                   |                                                                        |                                                                                                                                                                                                                                                                                                                                                                                                    |   |                        |   |                     |   |                    |   |                 |   |                 |   |                 |   |                       |
| Formulaire : <b>PA-Socio-demographic questionnaire</b> (pasociodemographic_questionnaire) <span>^ Collapse</span>                    |                                                                                                   |                                                                        |                                                                                                                                                                                                                                                                                                                                                                                                    |   |                        |   |                     |   |                    |   |                 |   |                 |   |                 |   |                       |
| 18                                                                                                                                   | pa_bidon6pa_v2                                                                                    | To begin the questionnaire, here are some socio-demographic questions. | descriptive                                                                                                                                                                                                                                                                                                                                                                                        |   |                        |   |                     |   |                    |   |                 |   |                 |   |                 |   |                       |
| 19                                                                                                                                   | pa_sexepa_v2                                                                                      | You are...?                                                            | radio<br><table border="1"> <tr><td>1</td><td>A woman</td></tr> <tr><td>2</td><td>A man</td></tr> </table> Alignement personnalisé : LV                                                                                                                                                                                                                                                            | 1 | A woman                | 2 | A man               |   |                    |   |                 |   |                 |   |                 |   |                       |
| 1                                                                                                                                    | A woman                                                                                           |                                                                        |                                                                                                                                                                                                                                                                                                                                                                                                    |   |                        |   |                     |   |                    |   |                 |   |                 |   |                 |   |                       |
| 2                                                                                                                                    | A man                                                                                             |                                                                        |                                                                                                                                                                                                                                                                                                                                                                                                    |   |                        |   |                     |   |                    |   |                 |   |                 |   |                 |   |                       |
| 20                                                                                                                                   | pa_agepa_v2                                                                                       | What is your age group?                                                | radio<br><table border="1"> <tr><td>1</td><td>24 years old and under</td></tr> <tr><td>2</td><td>25-34 years old</td></tr> <tr><td>3</td><td>35-44 years old</td></tr> <tr><td>4</td><td>45-54 years old</td></tr> <tr><td>5</td><td>55-64 years old</td></tr> <tr><td>6</td><td>65-74 years old</td></tr> <tr><td>7</td><td>75 years old and over</td></tr> </table> Alignement personnalisé : LV | 1 | 24 years old and under | 2 | 25-34 years old     | 3 | 35-44 years old    | 4 | 45-54 years old | 5 | 55-64 years old | 6 | 65-74 years old | 7 | 75 years old and over |
| 1                                                                                                                                    | 24 years old and under                                                                            |                                                                        |                                                                                                                                                                                                                                                                                                                                                                                                    |   |                        |   |                     |   |                    |   |                 |   |                 |   |                 |   |                       |
| 2                                                                                                                                    | 25-34 years old                                                                                   |                                                                        |                                                                                                                                                                                                                                                                                                                                                                                                    |   |                        |   |                     |   |                    |   |                 |   |                 |   |                 |   |                       |
| 3                                                                                                                                    | 35-44 years old                                                                                   |                                                                        |                                                                                                                                                                                                                                                                                                                                                                                                    |   |                        |   |                     |   |                    |   |                 |   |                 |   |                 |   |                       |
| 4                                                                                                                                    | 45-54 years old                                                                                   |                                                                        |                                                                                                                                                                                                                                                                                                                                                                                                    |   |                        |   |                     |   |                    |   |                 |   |                 |   |                 |   |                       |
| 5                                                                                                                                    | 55-64 years old                                                                                   |                                                                        |                                                                                                                                                                                                                                                                                                                                                                                                    |   |                        |   |                     |   |                    |   |                 |   |                 |   |                 |   |                       |
| 6                                                                                                                                    | 65-74 years old                                                                                   |                                                                        |                                                                                                                                                                                                                                                                                                                                                                                                    |   |                        |   |                     |   |                    |   |                 |   |                 |   |                 |   |                       |
| 7                                                                                                                                    | 75 years old and over                                                                             |                                                                        |                                                                                                                                                                                                                                                                                                                                                                                                    |   |                        |   |                     |   |                    |   |                 |   |                 |   |                 |   |                       |
| 21                                                                                                                                   | pa_nepa_v2                                                                                        | Where were you born?                                                   | radio<br><table border="1"> <tr><td>1</td><td>In Quebec</td></tr> <tr><td>2</td><td>Elsewhere in Canada</td></tr> <tr><td>3</td><td>Outside Canada</td></tr> <tr><td>4</td><td>Does not answer</td></tr> </table> Alignement personnalisé : LV                                                                                                                                                     | 1 | In Quebec              | 2 | Elsewhere in Canada | 3 | Outside Canada     | 4 | Does not answer |   |                 |   |                 |   |                       |
| 1                                                                                                                                    | In Quebec                                                                                         |                                                                        |                                                                                                                                                                                                                                                                                                                                                                                                    |   |                        |   |                     |   |                    |   |                 |   |                 |   |                 |   |                       |
| 2                                                                                                                                    | Elsewhere in Canada                                                                               |                                                                        |                                                                                                                                                                                                                                                                                                                                                                                                    |   |                        |   |                     |   |                    |   |                 |   |                 |   |                 |   |                       |
| 3                                                                                                                                    | Outside Canada                                                                                    |                                                                        |                                                                                                                                                                                                                                                                                                                                                                                                    |   |                        |   |                     |   |                    |   |                 |   |                 |   |                 |   |                       |
| 4                                                                                                                                    | Does not answer                                                                                   |                                                                        |                                                                                                                                                                                                                                                                                                                                                                                                    |   |                        |   |                     |   |                    |   |                 |   |                 |   |                 |   |                       |
| 22                                                                                                                                   | pa_neepascanadapa_v2<br>Afficher le champ UNIQUEM<br>ENT si :<br>[pa_nepa_v2] = '3'               | If you were born outside of Canada, please specify the country.        | text<br>Alignement personnalisé : LV                                                                                                                                                                                                                                                                                                                                                               |   |                        |   |                     |   |                    |   |                 |   |                 |   |                 |   |                       |
| 23                                                                                                                                   | pa_anqcpa_v2<br>Afficher le champ UNIQUEM<br>ENT si :<br>[pa_nepa_v2] = '2' or [pa_nepa_v2] = '3' | How many years have you lived in Quebec?                               | radio<br><table border="1"> <tr><td>1</td><td>Less than 5 years</td></tr> <tr><td>2</td><td>5 to 10 years</td></tr> <tr><td>3</td><td>More than 10 years</td></tr> <tr><td>4</td><td>Don't know</td></tr> </table> Alignement personnalisé : LV                                                                                                                                                    | 1 | Less than 5 years      | 2 | 5 to 10 years       | 3 | More than 10 years | 4 | Don't know      |   |                 |   |                 |   |                       |
| 1                                                                                                                                    | Less than 5 years                                                                                 |                                                                        |                                                                                                                                                                                                                                                                                                                                                                                                    |   |                        |   |                     |   |                    |   |                 |   |                 |   |                 |   |                       |
| 2                                                                                                                                    | 5 to 10 years                                                                                     |                                                                        |                                                                                                                                                                                                                                                                                                                                                                                                    |   |                        |   |                     |   |                    |   |                 |   |                 |   |                 |   |                       |
| 3                                                                                                                                    | More than 10 years                                                                                |                                                                        |                                                                                                                                                                                                                                                                                                                                                                                                    |   |                        |   |                     |   |                    |   |                 |   |                 |   |                 |   |                       |
| 4                                                                                                                                    | Don't know                                                                                        |                                                                        |                                                                                                                                                                                                                                                                                                                                                                                                    |   |                        |   |                     |   |                    |   |                 |   |                 |   |                 |   |                       |

|    |                                                                                               |                                                                                                                                     |                                                                                                                                                                                                                                                                                                                                                                                                                                                                                                                                                                                                                                                                                                                                                                                                                                                                                                                           |   |                                      |        |                                 |                          |                              |   |                                            |        |                          |                          |                                       |   |                                      |       |                                 |   |           |   |                |    |                               |    |                      |    |       |    |            |    |             |    |            |    |         |    |                               |
|----|-----------------------------------------------------------------------------------------------|-------------------------------------------------------------------------------------------------------------------------------------|---------------------------------------------------------------------------------------------------------------------------------------------------------------------------------------------------------------------------------------------------------------------------------------------------------------------------------------------------------------------------------------------------------------------------------------------------------------------------------------------------------------------------------------------------------------------------------------------------------------------------------------------------------------------------------------------------------------------------------------------------------------------------------------------------------------------------------------------------------------------------------------------------------------------------|---|--------------------------------------|--------|---------------------------------|--------------------------|------------------------------|---|--------------------------------------------|--------|--------------------------|--------------------------|---------------------------------------|---|--------------------------------------|-------|---------------------------------|---|-----------|---|----------------|----|-------------------------------|----|----------------------|----|-------|----|------------|----|-------------|----|------------|----|---------|----|-------------------------------|
| 24 | ppa57pa_v2                                                                                    | In which administrative region do you live?                                                                                         | <p>radio</p> <table border="1"> <tr><td>0</td><td>Bas-Saint-Laurent</td></tr> <tr><td>1</td><td>Saguenay-Lac-Saint-Jean</td></tr> <tr><td>2</td><td>Capitale-Nationale (Québec)</td></tr> <tr><td>3</td><td>Mauricie-et-Centre-du-Québec</td></tr> <tr><td>4</td><td>Estrie</td></tr> <tr><td>5</td><td>Montréal</td></tr> <tr><td>6</td><td>Outaouais</td></tr> <tr><td>7</td><td>Abitibi-Témiscamingue</td></tr> <tr><td>8</td><td>Côte-Nord</td></tr> <tr><td>9</td><td>Nord-du-Québec</td></tr> <tr><td>10</td><td>Gaspésie-Îles-de-la-Madeleine</td></tr> <tr><td>11</td><td>Chaudière-Appalaches</td></tr> <tr><td>12</td><td>Laval</td></tr> <tr><td>13</td><td>Lanaudière</td></tr> <tr><td>14</td><td>Laurentides</td></tr> <tr><td>15</td><td>Montérégie</td></tr> <tr><td>16</td><td>Nunavik</td></tr> <tr><td>17</td><td>Terres-Cries-de-la-Baie-James</td></tr> </table> <p>Alignement personnalisé : LV</p> | 0 | Bas-Saint-Laurent                    | 1      | Saguenay-Lac-Saint-Jean         | 2                        | Capitale-Nationale (Québec)  | 3 | Mauricie-et-Centre-du-Québec               | 4      | Estrie                   | 5                        | Montréal                              | 6 | Outaouais                            | 7     | Abitibi-Témiscamingue           | 8 | Côte-Nord | 9 | Nord-du-Québec | 10 | Gaspésie-Îles-de-la-Madeleine | 11 | Chaudière-Appalaches | 12 | Laval | 13 | Lanaudière | 14 | Laurentides | 15 | Montérégie | 16 | Nunavik | 17 | Terres-Cries-de-la-Baie-James |
| 0  | Bas-Saint-Laurent                                                                             |                                                                                                                                     |                                                                                                                                                                                                                                                                                                                                                                                                                                                                                                                                                                                                                                                                                                                                                                                                                                                                                                                           |   |                                      |        |                                 |                          |                              |   |                                            |        |                          |                          |                                       |   |                                      |       |                                 |   |           |   |                |    |                               |    |                      |    |       |    |            |    |             |    |            |    |         |    |                               |
| 1  | Saguenay-Lac-Saint-Jean                                                                       |                                                                                                                                     |                                                                                                                                                                                                                                                                                                                                                                                                                                                                                                                                                                                                                                                                                                                                                                                                                                                                                                                           |   |                                      |        |                                 |                          |                              |   |                                            |        |                          |                          |                                       |   |                                      |       |                                 |   |           |   |                |    |                               |    |                      |    |       |    |            |    |             |    |            |    |         |    |                               |
| 2  | Capitale-Nationale (Québec)                                                                   |                                                                                                                                     |                                                                                                                                                                                                                                                                                                                                                                                                                                                                                                                                                                                                                                                                                                                                                                                                                                                                                                                           |   |                                      |        |                                 |                          |                              |   |                                            |        |                          |                          |                                       |   |                                      |       |                                 |   |           |   |                |    |                               |    |                      |    |       |    |            |    |             |    |            |    |         |    |                               |
| 3  | Mauricie-et-Centre-du-Québec                                                                  |                                                                                                                                     |                                                                                                                                                                                                                                                                                                                                                                                                                                                                                                                                                                                                                                                                                                                                                                                                                                                                                                                           |   |                                      |        |                                 |                          |                              |   |                                            |        |                          |                          |                                       |   |                                      |       |                                 |   |           |   |                |    |                               |    |                      |    |       |    |            |    |             |    |            |    |         |    |                               |
| 4  | Estrie                                                                                        |                                                                                                                                     |                                                                                                                                                                                                                                                                                                                                                                                                                                                                                                                                                                                                                                                                                                                                                                                                                                                                                                                           |   |                                      |        |                                 |                          |                              |   |                                            |        |                          |                          |                                       |   |                                      |       |                                 |   |           |   |                |    |                               |    |                      |    |       |    |            |    |             |    |            |    |         |    |                               |
| 5  | Montréal                                                                                      |                                                                                                                                     |                                                                                                                                                                                                                                                                                                                                                                                                                                                                                                                                                                                                                                                                                                                                                                                                                                                                                                                           |   |                                      |        |                                 |                          |                              |   |                                            |        |                          |                          |                                       |   |                                      |       |                                 |   |           |   |                |    |                               |    |                      |    |       |    |            |    |             |    |            |    |         |    |                               |
| 6  | Outaouais                                                                                     |                                                                                                                                     |                                                                                                                                                                                                                                                                                                                                                                                                                                                                                                                                                                                                                                                                                                                                                                                                                                                                                                                           |   |                                      |        |                                 |                          |                              |   |                                            |        |                          |                          |                                       |   |                                      |       |                                 |   |           |   |                |    |                               |    |                      |    |       |    |            |    |             |    |            |    |         |    |                               |
| 7  | Abitibi-Témiscamingue                                                                         |                                                                                                                                     |                                                                                                                                                                                                                                                                                                                                                                                                                                                                                                                                                                                                                                                                                                                                                                                                                                                                                                                           |   |                                      |        |                                 |                          |                              |   |                                            |        |                          |                          |                                       |   |                                      |       |                                 |   |           |   |                |    |                               |    |                      |    |       |    |            |    |             |    |            |    |         |    |                               |
| 8  | Côte-Nord                                                                                     |                                                                                                                                     |                                                                                                                                                                                                                                                                                                                                                                                                                                                                                                                                                                                                                                                                                                                                                                                                                                                                                                                           |   |                                      |        |                                 |                          |                              |   |                                            |        |                          |                          |                                       |   |                                      |       |                                 |   |           |   |                |    |                               |    |                      |    |       |    |            |    |             |    |            |    |         |    |                               |
| 9  | Nord-du-Québec                                                                                |                                                                                                                                     |                                                                                                                                                                                                                                                                                                                                                                                                                                                                                                                                                                                                                                                                                                                                                                                                                                                                                                                           |   |                                      |        |                                 |                          |                              |   |                                            |        |                          |                          |                                       |   |                                      |       |                                 |   |           |   |                |    |                               |    |                      |    |       |    |            |    |             |    |            |    |         |    |                               |
| 10 | Gaspésie-Îles-de-la-Madeleine                                                                 |                                                                                                                                     |                                                                                                                                                                                                                                                                                                                                                                                                                                                                                                                                                                                                                                                                                                                                                                                                                                                                                                                           |   |                                      |        |                                 |                          |                              |   |                                            |        |                          |                          |                                       |   |                                      |       |                                 |   |           |   |                |    |                               |    |                      |    |       |    |            |    |             |    |            |    |         |    |                               |
| 11 | Chaudière-Appalaches                                                                          |                                                                                                                                     |                                                                                                                                                                                                                                                                                                                                                                                                                                                                                                                                                                                                                                                                                                                                                                                                                                                                                                                           |   |                                      |        |                                 |                          |                              |   |                                            |        |                          |                          |                                       |   |                                      |       |                                 |   |           |   |                |    |                               |    |                      |    |       |    |            |    |             |    |            |    |         |    |                               |
| 12 | Laval                                                                                         |                                                                                                                                     |                                                                                                                                                                                                                                                                                                                                                                                                                                                                                                                                                                                                                                                                                                                                                                                                                                                                                                                           |   |                                      |        |                                 |                          |                              |   |                                            |        |                          |                          |                                       |   |                                      |       |                                 |   |           |   |                |    |                               |    |                      |    |       |    |            |    |             |    |            |    |         |    |                               |
| 13 | Lanaudière                                                                                    |                                                                                                                                     |                                                                                                                                                                                                                                                                                                                                                                                                                                                                                                                                                                                                                                                                                                                                                                                                                                                                                                                           |   |                                      |        |                                 |                          |                              |   |                                            |        |                          |                          |                                       |   |                                      |       |                                 |   |           |   |                |    |                               |    |                      |    |       |    |            |    |             |    |            |    |         |    |                               |
| 14 | Laurentides                                                                                   |                                                                                                                                     |                                                                                                                                                                                                                                                                                                                                                                                                                                                                                                                                                                                                                                                                                                                                                                                                                                                                                                                           |   |                                      |        |                                 |                          |                              |   |                                            |        |                          |                          |                                       |   |                                      |       |                                 |   |           |   |                |    |                               |    |                      |    |       |    |            |    |             |    |            |    |         |    |                               |
| 15 | Montérégie                                                                                    |                                                                                                                                     |                                                                                                                                                                                                                                                                                                                                                                                                                                                                                                                                                                                                                                                                                                                                                                                                                                                                                                                           |   |                                      |        |                                 |                          |                              |   |                                            |        |                          |                          |                                       |   |                                      |       |                                 |   |           |   |                |    |                               |    |                      |    |       |    |            |    |             |    |            |    |         |    |                               |
| 16 | Nunavik                                                                                       |                                                                                                                                     |                                                                                                                                                                                                                                                                                                                                                                                                                                                                                                                                                                                                                                                                                                                                                                                                                                                                                                                           |   |                                      |        |                                 |                          |                              |   |                                            |        |                          |                          |                                       |   |                                      |       |                                 |   |           |   |                |    |                               |    |                      |    |       |    |            |    |             |    |            |    |         |    |                               |
| 17 | Terres-Cries-de-la-Baie-James                                                                 |                                                                                                                                     |                                                                                                                                                                                                                                                                                                                                                                                                                                                                                                                                                                                                                                                                                                                                                                                                                                                                                                                           |   |                                      |        |                                 |                          |                              |   |                                            |        |                          |                          |                                       |   |                                      |       |                                 |   |           |   |                |    |                               |    |                      |    |       |    |            |    |             |    |            |    |         |    |                               |
| 25 | pa_nbmenagepa_v2                                                                              | How many people compose your household and reside permanently in your home, including you?                                          | <p>text (number)</p> <p>Alignement personnalisé : LV</p>                                                                                                                                                                                                                                                                                                                                                                                                                                                                                                                                                                                                                                                                                                                                                                                                                                                                  |   |                                      |        |                                 |                          |                              |   |                                            |        |                          |                          |                                       |   |                                      |       |                                 |   |           |   |                |    |                               |    |                      |    |       |    |            |    |             |    |            |    |         |    |                               |
| 26 | pa_nbchargepa_v2                                                                              | How many of the people in your household are dependent on you?                                                                      | <p>text (number)</p> <p>Alignement personnalisé : LV</p>                                                                                                                                                                                                                                                                                                                                                                                                                                                                                                                                                                                                                                                                                                                                                                                                                                                                  |   |                                      |        |                                 |                          |                              |   |                                            |        |                          |                          |                                       |   |                                      |       |                                 |   |           |   |                |    |                               |    |                      |    |       |    |            |    |             |    |            |    |         |    |                               |
| 27 | pa_situationpa_v2                                                                             | What type of situation best suits the composition of your household?                                                                | <p>radio</p> <table border="1"> <tr><td>1</td><td>Person living alone in the household</td></tr> <tr><td>2</td><td>Couple without children at home</td></tr> <tr><td>3</td><td>Couple with children at home</td></tr> <tr><td>4</td><td>Single-parent family (children of any age)</td></tr> <tr><td>5</td><td>Family with other people</td></tr> <tr><td>6</td><td>Related persons only (siblings, etc.)</td></tr> <tr><td>7</td><td>Non-related persons only (roommates)</td></tr> <tr><td>8</td><td>Other (multiple families, etc.)</td></tr> </table> <p>Alignement personnalisé : LV</p>                                                                                                                                                                                                                                                                                                                             | 1 | Person living alone in the household | 2      | Couple without children at home | 3                        | Couple with children at home | 4 | Single-parent family (children of any age) | 5      | Family with other people | 6                        | Related persons only (siblings, etc.) | 7 | Non-related persons only (roommates) | 8     | Other (multiple families, etc.) |   |           |   |                |    |                               |    |                      |    |       |    |            |    |             |    |            |    |         |    |                               |
| 1  | Person living alone in the household                                                          |                                                                                                                                     |                                                                                                                                                                                                                                                                                                                                                                                                                                                                                                                                                                                                                                                                                                                                                                                                                                                                                                                           |   |                                      |        |                                 |                          |                              |   |                                            |        |                          |                          |                                       |   |                                      |       |                                 |   |           |   |                |    |                               |    |                      |    |       |    |            |    |             |    |            |    |         |    |                               |
| 2  | Couple without children at home                                                               |                                                                                                                                     |                                                                                                                                                                                                                                                                                                                                                                                                                                                                                                                                                                                                                                                                                                                                                                                                                                                                                                                           |   |                                      |        |                                 |                          |                              |   |                                            |        |                          |                          |                                       |   |                                      |       |                                 |   |           |   |                |    |                               |    |                      |    |       |    |            |    |             |    |            |    |         |    |                               |
| 3  | Couple with children at home                                                                  |                                                                                                                                     |                                                                                                                                                                                                                                                                                                                                                                                                                                                                                                                                                                                                                                                                                                                                                                                                                                                                                                                           |   |                                      |        |                                 |                          |                              |   |                                            |        |                          |                          |                                       |   |                                      |       |                                 |   |           |   |                |    |                               |    |                      |    |       |    |            |    |             |    |            |    |         |    |                               |
| 4  | Single-parent family (children of any age)                                                    |                                                                                                                                     |                                                                                                                                                                                                                                                                                                                                                                                                                                                                                                                                                                                                                                                                                                                                                                                                                                                                                                                           |   |                                      |        |                                 |                          |                              |   |                                            |        |                          |                          |                                       |   |                                      |       |                                 |   |           |   |                |    |                               |    |                      |    |       |    |            |    |             |    |            |    |         |    |                               |
| 5  | Family with other people                                                                      |                                                                                                                                     |                                                                                                                                                                                                                                                                                                                                                                                                                                                                                                                                                                                                                                                                                                                                                                                                                                                                                                                           |   |                                      |        |                                 |                          |                              |   |                                            |        |                          |                          |                                       |   |                                      |       |                                 |   |           |   |                |    |                               |    |                      |    |       |    |            |    |             |    |            |    |         |    |                               |
| 6  | Related persons only (siblings, etc.)                                                         |                                                                                                                                     |                                                                                                                                                                                                                                                                                                                                                                                                                                                                                                                                                                                                                                                                                                                                                                                                                                                                                                                           |   |                                      |        |                                 |                          |                              |   |                                            |        |                          |                          |                                       |   |                                      |       |                                 |   |           |   |                |    |                               |    |                      |    |       |    |            |    |             |    |            |    |         |    |                               |
| 7  | Non-related persons only (roommates)                                                          |                                                                                                                                     |                                                                                                                                                                                                                                                                                                                                                                                                                                                                                                                                                                                                                                                                                                                                                                                                                                                                                                                           |   |                                      |        |                                 |                          |                              |   |                                            |        |                          |                          |                                       |   |                                      |       |                                 |   |           |   |                |    |                               |    |                      |    |       |    |            |    |             |    |            |    |         |    |                               |
| 8  | Other (multiple families, etc.)                                                               |                                                                                                                                     |                                                                                                                                                                                                                                                                                                                                                                                                                                                                                                                                                                                                                                                                                                                                                                                                                                                                                                                           |   |                                      |        |                                 |                          |                              |   |                                            |        |                          |                          |                                       |   |                                      |       |                                 |   |           |   |                |    |                               |    |                      |    |       |    |            |    |             |    |            |    |         |    |                               |
| 28 | pa_situationautrepa_v2<br>Afficher le champ UNIQUEMENT si :<br>[pa_situationpa_v2] = '8'      | If you answered "Other", please specify the composition of your household.                                                          | <p>text</p> <p>Alignement personnalisé : LV</p>                                                                                                                                                                                                                                                                                                                                                                                                                                                                                                                                                                                                                                                                                                                                                                                                                                                                           |   |                                      |        |                                 |                          |                              |   |                                            |        |                          |                          |                                       |   |                                      |       |                                 |   |           |   |                |    |                               |    |                      |    |       |    |            |    |             |    |            |    |         |    |                               |
| 29 | ppa_entou_v2_v2                                                                               | Is there one or more people in your entourage (spouse, child, friend, other) who can help you as needed for your medical follow-up? | <p>radio</p> <table border="1"> <tr><td>1</td><td>Yes</td></tr> <tr><td>2</td><td>No</td></tr> </table> <p>Alignement personnalisé : LV</p>                                                                                                                                                                                                                                                                                                                                                                                                                                                                                                                                                                                                                                                                                                                                                                               | 1 | Yes                                  | 2      | No                              |                          |                              |   |                                            |        |                          |                          |                                       |   |                                      |       |                                 |   |           |   |                |    |                               |    |                      |    |       |    |            |    |             |    |            |    |         |    |                               |
| 1  | Yes                                                                                           |                                                                                                                                     |                                                                                                                                                                                                                                                                                                                                                                                                                                                                                                                                                                                                                                                                                                                                                                                                                                                                                                                           |   |                                      |        |                                 |                          |                              |   |                                            |        |                          |                          |                                       |   |                                      |       |                                 |   |           |   |                |    |                               |    |                      |    |       |    |            |    |             |    |            |    |         |    |                               |
| 2  | No                                                                                            |                                                                                                                                     |                                                                                                                                                                                                                                                                                                                                                                                                                                                                                                                                                                                                                                                                                                                                                                                                                                                                                                                           |   |                                      |        |                                 |                          |                              |   |                                            |        |                          |                          |                                       |   |                                      |       |                                 |   |           |   |                |    |                               |    |                      |    |       |    |            |    |             |    |            |    |         |    |                               |
| 30 | ppa_entouprecis_v2_v2<br>Afficher le champ UNIQUEMENT si :<br>[ppa_entou_v2_v2] = '1'         | This person is your (you can choose more than one answer) :                                                                         | <p>checkbox</p> <table border="1"> <tr><td>1</td><td>ppa_entouprecis_v2_v2__1</td><td>Spouse</td></tr> <tr><td>2</td><td>ppa_entouprecis_v2_v2__2</td><td>Child</td></tr> <tr><td>3</td><td>ppa_entouprecis_v2_v2__3</td><td>Parent</td></tr> <tr><td>4</td><td>ppa_entouprecis_v2_v2__4</td><td>Friend</td></tr> <tr><td>5</td><td>ppa_entouprecis_v2_v2__5</td><td>Other</td></tr> </table> <p>Alignement personnalisé : LV</p>                                                                                                                                                                                                                                                                                                                                                                                                                                                                                         | 1 | ppa_entouprecis_v2_v2__1             | Spouse | 2                               | ppa_entouprecis_v2_v2__2 | Child                        | 3 | ppa_entouprecis_v2_v2__3                   | Parent | 4                        | ppa_entouprecis_v2_v2__4 | Friend                                | 5 | ppa_entouprecis_v2_v2__5             | Other |                                 |   |           |   |                |    |                               |    |                      |    |       |    |            |    |             |    |            |    |         |    |                               |
| 1  | ppa_entouprecis_v2_v2__1                                                                      | Spouse                                                                                                                              |                                                                                                                                                                                                                                                                                                                                                                                                                                                                                                                                                                                                                                                                                                                                                                                                                                                                                                                           |   |                                      |        |                                 |                          |                              |   |                                            |        |                          |                          |                                       |   |                                      |       |                                 |   |           |   |                |    |                               |    |                      |    |       |    |            |    |             |    |            |    |         |    |                               |
| 2  | ppa_entouprecis_v2_v2__2                                                                      | Child                                                                                                                               |                                                                                                                                                                                                                                                                                                                                                                                                                                                                                                                                                                                                                                                                                                                                                                                                                                                                                                                           |   |                                      |        |                                 |                          |                              |   |                                            |        |                          |                          |                                       |   |                                      |       |                                 |   |           |   |                |    |                               |    |                      |    |       |    |            |    |             |    |            |    |         |    |                               |
| 3  | ppa_entouprecis_v2_v2__3                                                                      | Parent                                                                                                                              |                                                                                                                                                                                                                                                                                                                                                                                                                                                                                                                                                                                                                                                                                                                                                                                                                                                                                                                           |   |                                      |        |                                 |                          |                              |   |                                            |        |                          |                          |                                       |   |                                      |       |                                 |   |           |   |                |    |                               |    |                      |    |       |    |            |    |             |    |            |    |         |    |                               |
| 4  | ppa_entouprecis_v2_v2__4                                                                      | Friend                                                                                                                              |                                                                                                                                                                                                                                                                                                                                                                                                                                                                                                                                                                                                                                                                                                                                                                                                                                                                                                                           |   |                                      |        |                                 |                          |                              |   |                                            |        |                          |                          |                                       |   |                                      |       |                                 |   |           |   |                |    |                               |    |                      |    |       |    |            |    |             |    |            |    |         |    |                               |
| 5  | ppa_entouprecis_v2_v2__5                                                                      | Other                                                                                                                               |                                                                                                                                                                                                                                                                                                                                                                                                                                                                                                                                                                                                                                                                                                                                                                                                                                                                                                                           |   |                                      |        |                                 |                          |                              |   |                                            |        |                          |                          |                                       |   |                                      |       |                                 |   |           |   |                |    |                               |    |                      |    |       |    |            |    |             |    |            |    |         |    |                               |
| 31 | pro_entouautre_v2_v2<br>Afficher le champ UNIQUEMENT si :<br>[ppa_entouprecis_v2_v2(5)] = '1' | If you answered "Other", please specify:                                                                                            | <p>text</p> <p>Alignement personnalisé : LV</p>                                                                                                                                                                                                                                                                                                                                                                                                                                                                                                                                                                                                                                                                                                                                                                                                                                                                           |   |                                      |        |                                 |                          |                              |   |                                            |        |                          |                          |                                       |   |                                      |       |                                 |   |           |   |                |    |                               |    |                      |    |       |    |            |    |             |    |            |    |         |    |                               |

|    |                                                                                               |                                                                                              |                                                                                                                                                                                                                                                                                                                                                                                                                                                                                                                                                                                                                                                                                 |   |                                               |   |                                                                                               |   |                                       |   |                                         |   |                                                                              |   |                                                                                       |   |                               |   |                               |   |                                               |    |       |
|----|-----------------------------------------------------------------------------------------------|----------------------------------------------------------------------------------------------|---------------------------------------------------------------------------------------------------------------------------------------------------------------------------------------------------------------------------------------------------------------------------------------------------------------------------------------------------------------------------------------------------------------------------------------------------------------------------------------------------------------------------------------------------------------------------------------------------------------------------------------------------------------------------------|---|-----------------------------------------------|---|-----------------------------------------------------------------------------------------------|---|---------------------------------------|---|-----------------------------------------|---|------------------------------------------------------------------------------|---|---------------------------------------------------------------------------------------|---|-------------------------------|---|-------------------------------|---|-----------------------------------------------|----|-------|
| 32 | pa_educpa_v2                                                                                  | What is the highest level of education you have completed?                                   | <p>radio</p> <table border="1"> <tr><td>1</td><td>No diploma</td></tr> <tr><td>2</td><td>Elementary education</td></tr> <tr><td>3</td><td>Partial studies in High School (I-IV)</td></tr> <tr><td>4</td><td>High School Diploma (Sec V or Grade 12)</td></tr> <tr><td>5</td><td>Partial studies in a CEGEP, technical school or professional training school</td></tr> <tr><td>6</td><td>Diploma or certificate from a CEGEP, technical school or professional training school</td></tr> <tr><td>7</td><td>Partial studies at university</td></tr> <tr><td>8</td><td>University degree</td></tr> <tr><td>9</td><td>Other</td></tr> </table> <p>Alignement personnalisé : LV</p> | 1 | No diploma                                    | 2 | Elementary education                                                                          | 3 | Partial studies in High School (I-IV) | 4 | High School Diploma (Sec V or Grade 12) | 5 | Partial studies in a CEGEP, technical school or professional training school | 6 | Diploma or certificate from a CEGEP, technical school or professional training school | 7 | Partial studies at university | 8 | University degree             | 9 | Other                                         |    |       |
| 1  | No diploma                                                                                    |                                                                                              |                                                                                                                                                                                                                                                                                                                                                                                                                                                                                                                                                                                                                                                                                 |   |                                               |   |                                                                                               |   |                                       |   |                                         |   |                                                                              |   |                                                                                       |   |                               |   |                               |   |                                               |    |       |
| 2  | Elementary education                                                                          |                                                                                              |                                                                                                                                                                                                                                                                                                                                                                                                                                                                                                                                                                                                                                                                                 |   |                                               |   |                                                                                               |   |                                       |   |                                         |   |                                                                              |   |                                                                                       |   |                               |   |                               |   |                                               |    |       |
| 3  | Partial studies in High School (I-IV)                                                         |                                                                                              |                                                                                                                                                                                                                                                                                                                                                                                                                                                                                                                                                                                                                                                                                 |   |                                               |   |                                                                                               |   |                                       |   |                                         |   |                                                                              |   |                                                                                       |   |                               |   |                               |   |                                               |    |       |
| 4  | High School Diploma (Sec V or Grade 12)                                                       |                                                                                              |                                                                                                                                                                                                                                                                                                                                                                                                                                                                                                                                                                                                                                                                                 |   |                                               |   |                                                                                               |   |                                       |   |                                         |   |                                                                              |   |                                                                                       |   |                               |   |                               |   |                                               |    |       |
| 5  | Partial studies in a CEGEP, technical school or professional training school                  |                                                                                              |                                                                                                                                                                                                                                                                                                                                                                                                                                                                                                                                                                                                                                                                                 |   |                                               |   |                                                                                               |   |                                       |   |                                         |   |                                                                              |   |                                                                                       |   |                               |   |                               |   |                                               |    |       |
| 6  | Diploma or certificate from a CEGEP, technical school or professional training school         |                                                                                              |                                                                                                                                                                                                                                                                                                                                                                                                                                                                                                                                                                                                                                                                                 |   |                                               |   |                                                                                               |   |                                       |   |                                         |   |                                                                              |   |                                                                                       |   |                               |   |                               |   |                                               |    |       |
| 7  | Partial studies at university                                                                 |                                                                                              |                                                                                                                                                                                                                                                                                                                                                                                                                                                                                                                                                                                                                                                                                 |   |                                               |   |                                                                                               |   |                                       |   |                                         |   |                                                                              |   |                                                                                       |   |                               |   |                               |   |                                               |    |       |
| 8  | University degree                                                                             |                                                                                              |                                                                                                                                                                                                                                                                                                                                                                                                                                                                                                                                                                                                                                                                                 |   |                                               |   |                                                                                               |   |                                       |   |                                         |   |                                                                              |   |                                                                                       |   |                               |   |                               |   |                                               |    |       |
| 9  | Other                                                                                         |                                                                                              |                                                                                                                                                                                                                                                                                                                                                                                                                                                                                                                                                                                                                                                                                 |   |                                               |   |                                                                                               |   |                                       |   |                                         |   |                                                                              |   |                                                                                       |   |                               |   |                               |   |                                               |    |       |
| 33 | pa_eduautrepa_v2<br>Afficher le champ UNIQUEM ENT si : [pa_educpa_v2] = '9'                   | If you checked "Other", please specify the highest level of education you have completed.    | <p>text</p> <p>Alignement personnalisé : LV</p>                                                                                                                                                                                                                                                                                                                                                                                                                                                                                                                                                                                                                                 |   |                                               |   |                                                                                               |   |                                       |   |                                         |   |                                                                              |   |                                                                                       |   |                               |   |                               |   |                                               |    |       |
| 34 | pa_occupa_v2                                                                                  | In the past 12 months, what was your main occupation?                                        | <p>radio</p> <table border="1"> <tr><td>1</td><td>Full-time worker</td></tr> <tr><td>2</td><td>Part-time worker</td></tr> <tr><td>3</td><td>Student</td></tr> <tr><td>4</td><td>Volunteer/Unpaid Worker</td></tr> <tr><td>5</td><td>Retired</td></tr> <tr><td>6</td><td>Homemaker</td></tr> <tr><td>7</td><td>On maternity/paternity leave</td></tr> <tr><td>8</td><td>Employment Insurance claimant</td></tr> <tr><td>9</td><td>Income assistance recipient (income security)</td></tr> <tr><td>10</td><td>Other</td></tr> </table> <p>Alignement personnalisé : LV</p>                                                                                                        | 1 | Full-time worker                              | 2 | Part-time worker                                                                              | 3 | Student                               | 4 | Volunteer/Unpaid Worker                 | 5 | Retired                                                                      | 6 | Homemaker                                                                             | 7 | On maternity/paternity leave  | 8 | Employment Insurance claimant | 9 | Income assistance recipient (income security) | 10 | Other |
| 1  | Full-time worker                                                                              |                                                                                              |                                                                                                                                                                                                                                                                                                                                                                                                                                                                                                                                                                                                                                                                                 |   |                                               |   |                                                                                               |   |                                       |   |                                         |   |                                                                              |   |                                                                                       |   |                               |   |                               |   |                                               |    |       |
| 2  | Part-time worker                                                                              |                                                                                              |                                                                                                                                                                                                                                                                                                                                                                                                                                                                                                                                                                                                                                                                                 |   |                                               |   |                                                                                               |   |                                       |   |                                         |   |                                                                              |   |                                                                                       |   |                               |   |                               |   |                                               |    |       |
| 3  | Student                                                                                       |                                                                                              |                                                                                                                                                                                                                                                                                                                                                                                                                                                                                                                                                                                                                                                                                 |   |                                               |   |                                                                                               |   |                                       |   |                                         |   |                                                                              |   |                                                                                       |   |                               |   |                               |   |                                               |    |       |
| 4  | Volunteer/Unpaid Worker                                                                       |                                                                                              |                                                                                                                                                                                                                                                                                                                                                                                                                                                                                                                                                                                                                                                                                 |   |                                               |   |                                                                                               |   |                                       |   |                                         |   |                                                                              |   |                                                                                       |   |                               |   |                               |   |                                               |    |       |
| 5  | Retired                                                                                       |                                                                                              |                                                                                                                                                                                                                                                                                                                                                                                                                                                                                                                                                                                                                                                                                 |   |                                               |   |                                                                                               |   |                                       |   |                                         |   |                                                                              |   |                                                                                       |   |                               |   |                               |   |                                               |    |       |
| 6  | Homemaker                                                                                     |                                                                                              |                                                                                                                                                                                                                                                                                                                                                                                                                                                                                                                                                                                                                                                                                 |   |                                               |   |                                                                                               |   |                                       |   |                                         |   |                                                                              |   |                                                                                       |   |                               |   |                               |   |                                               |    |       |
| 7  | On maternity/paternity leave                                                                  |                                                                                              |                                                                                                                                                                                                                                                                                                                                                                                                                                                                                                                                                                                                                                                                                 |   |                                               |   |                                                                                               |   |                                       |   |                                         |   |                                                                              |   |                                                                                       |   |                               |   |                               |   |                                               |    |       |
| 8  | Employment Insurance claimant                                                                 |                                                                                              |                                                                                                                                                                                                                                                                                                                                                                                                                                                                                                                                                                                                                                                                                 |   |                                               |   |                                                                                               |   |                                       |   |                                         |   |                                                                              |   |                                                                                       |   |                               |   |                               |   |                                               |    |       |
| 9  | Income assistance recipient (income security)                                                 |                                                                                              |                                                                                                                                                                                                                                                                                                                                                                                                                                                                                                                                                                                                                                                                                 |   |                                               |   |                                                                                               |   |                                       |   |                                         |   |                                                                              |   |                                                                                       |   |                               |   |                               |   |                                               |    |       |
| 10 | Other                                                                                         |                                                                                              |                                                                                                                                                                                                                                                                                                                                                                                                                                                                                                                                                                                                                                                                                 |   |                                               |   |                                                                                               |   |                                       |   |                                         |   |                                                                              |   |                                                                                       |   |                               |   |                               |   |                                               |    |       |
| 35 | pa_occuautrepa_v2<br>Afficher le champ UNIQUEM ENT si : [pa_occupa_v2] = '10'                 | If you answered "Other", please specify what was your main occupation in the last 12 months. | <p>text</p> <p>Alignement personnalisé : LV</p>                                                                                                                                                                                                                                                                                                                                                                                                                                                                                                                                                                                                                                 |   |                                               |   |                                                                                               |   |                                       |   |                                         |   |                                                                              |   |                                                                                       |   |                               |   |                               |   |                                               |    |       |
| 36 | pa_finanpa_v2                                                                                 | How do you feel about your financial situation compared to people your own age?              | <p>radio</p> <table border="1"> <tr><td>1</td><td>You consider yourself financially comfortable</td></tr> <tr><td>2</td><td>You consider that your income is sufficient to meet your basic needs or those of your family.</td></tr> <tr><td>3</td><td>You consider yourself poor</td></tr> <tr><td>4</td><td>You consider yourself very poor</td></tr> </table> <p>Alignement personnalisé : LV</p>                                                                                                                                                                                                                                                                             | 1 | You consider yourself financially comfortable | 2 | You consider that your income is sufficient to meet your basic needs or those of your family. | 3 | You consider yourself poor            | 4 | You consider yourself very poor         |   |                                                                              |   |                                                                                       |   |                               |   |                               |   |                                               |    |       |
| 1  | You consider yourself financially comfortable                                                 |                                                                                              |                                                                                                                                                                                                                                                                                                                                                                                                                                                                                                                                                                                                                                                                                 |   |                                               |   |                                                                                               |   |                                       |   |                                         |   |                                                                              |   |                                                                                       |   |                               |   |                               |   |                                               |    |       |
| 2  | You consider that your income is sufficient to meet your basic needs or those of your family. |                                                                                              |                                                                                                                                                                                                                                                                                                                                                                                                                                                                                                                                                                                                                                                                                 |   |                                               |   |                                                                                               |   |                                       |   |                                         |   |                                                                              |   |                                                                                       |   |                               |   |                               |   |                                               |    |       |
| 3  | You consider yourself poor                                                                    |                                                                                              |                                                                                                                                                                                                                                                                                                                                                                                                                                                                                                                                                                                                                                                                                 |   |                                               |   |                                                                                               |   |                                       |   |                                         |   |                                                                              |   |                                                                                       |   |                               |   |                               |   |                                               |    |       |
| 4  | You consider yourself very poor                                                               |                                                                                              |                                                                                                                                                                                                                                                                                                                                                                                                                                                                                                                                                                                                                                                                                 |   |                                               |   |                                                                                               |   |                                       |   |                                         |   |                                                                              |   |                                                                                       |   |                               |   |                               |   |                                               |    |       |
| 37 | pasociodemographic_questionnaire_complete                                                     | En-tête de section : <i>Form Status</i><br>Complete?                                         | <p>dropdown</p> <table border="1"> <tr><td>0</td><td>Incomplete</td></tr> <tr><td>1</td><td>Unverified</td></tr> <tr><td>2</td><td>Complete</td></tr> </table>                                                                                                                                                                                                                                                                                                                                                                                                                                                                                                                  | 0 | Incomplete                                    | 1 | Unverified                                                                                    | 2 | Complete                              |   |                                         |   |                                                                              |   |                                                                                       |   |                               |   |                               |   |                                               |    |       |
| 0  | Incomplete                                                                                    |                                                                                              |                                                                                                                                                                                                                                                                                                                                                                                                                                                                                                                                                                                                                                                                                 |   |                                               |   |                                                                                               |   |                                       |   |                                         |   |                                                                              |   |                                                                                       |   |                               |   |                               |   |                                               |    |       |
| 1  | Unverified                                                                                    |                                                                                              |                                                                                                                                                                                                                                                                                                                                                                                                                                                                                                                                                                                                                                                                                 |   |                                               |   |                                                                                               |   |                                       |   |                                         |   |                                                                              |   |                                                                                       |   |                               |   |                               |   |                                               |    |       |
| 2  | Complete                                                                                      |                                                                                              |                                                                                                                                                                                                                                                                                                                                                                                                                                                                                                                                                                                                                                                                                 |   |                                               |   |                                                                                               |   |                                       |   |                                         |   |                                                                              |   |                                                                                       |   |                               |   |                               |   |                                               |    |       |

Formulaire : **PA's care experience questionnaire** (pas\_care\_experience\_questionnaire)

[^ Collapse](#)

|    |       |                                                                                                                                                                                                                                                                                                                                                                                                                       |                    |
|----|-------|-----------------------------------------------------------------------------------------------------------------------------------------------------------------------------------------------------------------------------------------------------------------------------------------------------------------------------------------------------------------------------------------------------------------------|--------------------|
| 38 | intro | <p>The following questions focus on your clinical experience and the information provided by your health care team during your own episode of care related to cancer or genetic predisposition to cancer.</p> <p>By care team, we mean the various health care professionals working together: doctors, nurses, pivot nurses, pharmacists, nutritionists, psychologists, social workers, physiotherapists, etc...</p> | <p>descriptive</p> |
|----|-------|-----------------------------------------------------------------------------------------------------------------------------------------------------------------------------------------------------------------------------------------------------------------------------------------------------------------------------------------------------------------------------------------------------------------------|--------------------|

|       |                                                                                              |                                                            |                                                                                                                                                                                                                                                                                                                                                                                                                                                                                                                                                                                                                                                                                                                                                                                                                                                                                                                                                       |       |  |   |                      |   |                                                          |   |                                         |   |                                   |   |                      |   |                                               |   |                      |   |                                      |   |                        |    |          |    |       |    |          |    |                         |    |                 |    |          |    |        |    |        |    |         |    |         |    |              |
|-------|----------------------------------------------------------------------------------------------|------------------------------------------------------------|-------------------------------------------------------------------------------------------------------------------------------------------------------------------------------------------------------------------------------------------------------------------------------------------------------------------------------------------------------------------------------------------------------------------------------------------------------------------------------------------------------------------------------------------------------------------------------------------------------------------------------------------------------------------------------------------------------------------------------------------------------------------------------------------------------------------------------------------------------------------------------------------------------------------------------------------------------|-------|--|---|----------------------|---|----------------------------------------------------------|---|-----------------------------------------|---|-----------------------------------|---|----------------------|---|-----------------------------------------------|---|----------------------|---|--------------------------------------|---|------------------------|----|----------|----|-------|----|----------|----|-------------------------|----|-----------------|----|----------|----|--------|----|--------|----|---------|----|---------|----|--------------|
| 39    | ppa_recu                                                                                     | In which institution were you recruited for this project?  | <table border="1"> <tr><td colspan="2">radio</td></tr> <tr><td>0</td><td>At CHUM</td></tr> <tr><td>1</td><td>At CIUSSS de la Mauricie-et-du-Centre-du-Québec</td></tr> <tr><td>2</td><td>At CIUSSS de l'Est-de-l'Île-de-Montréal</td></tr> <tr><td>3</td><td>At CHU de Québec-Université Laval</td></tr> <tr><td>4</td><td>At CISSS de Laval</td></tr> <tr><td>5</td><td>At CIUSS du Centre-Ouest-de-l'Île-de-Montréal</td></tr> <tr><td>6</td><td>At CISSS de Gaspésie</td></tr> <tr><td>7</td><td>At CIUSSS de Saguenay-Lac-Saint-Jean</td></tr> <tr><td>8</td><td>At CUSM</td></tr> </table> <p>Alignement personnalisé : LV</p>                                                                                                                                                                                                                                                                                                                   | radio |  | 0 | At CHUM              | 1 | At CIUSSS de la Mauricie-et-du-Centre-du-Québec          | 2 | At CIUSSS de l'Est-de-l'Île-de-Montréal | 3 | At CHU de Québec-Université Laval | 4 | At CISSS de Laval    | 5 | At CIUSS du Centre-Ouest-de-l'Île-de-Montréal | 6 | At CISSS de Gaspésie | 7 | At CIUSSS de Saguenay-Lac-Saint-Jean | 8 | At CUSM                |    |          |    |       |    |          |    |                         |    |                 |    |          |    |        |    |        |    |         |    |         |    |              |
| radio |                                                                                              |                                                            |                                                                                                                                                                                                                                                                                                                                                                                                                                                                                                                                                                                                                                                                                                                                                                                                                                                                                                                                                       |       |  |   |                      |   |                                                          |   |                                         |   |                                   |   |                      |   |                                               |   |                      |   |                                      |   |                        |    |          |    |       |    |          |    |                         |    |                 |    |          |    |        |    |        |    |         |    |         |    |              |
| 0     | At CHUM                                                                                      |                                                            |                                                                                                                                                                                                                                                                                                                                                                                                                                                                                                                                                                                                                                                                                                                                                                                                                                                                                                                                                       |       |  |   |                      |   |                                                          |   |                                         |   |                                   |   |                      |   |                                               |   |                      |   |                                      |   |                        |    |          |    |       |    |          |    |                         |    |                 |    |          |    |        |    |        |    |         |    |         |    |              |
| 1     | At CIUSSS de la Mauricie-et-du-Centre-du-Québec                                              |                                                            |                                                                                                                                                                                                                                                                                                                                                                                                                                                                                                                                                                                                                                                                                                                                                                                                                                                                                                                                                       |       |  |   |                      |   |                                                          |   |                                         |   |                                   |   |                      |   |                                               |   |                      |   |                                      |   |                        |    |          |    |       |    |          |    |                         |    |                 |    |          |    |        |    |        |    |         |    |         |    |              |
| 2     | At CIUSSS de l'Est-de-l'Île-de-Montréal                                                      |                                                            |                                                                                                                                                                                                                                                                                                                                                                                                                                                                                                                                                                                                                                                                                                                                                                                                                                                                                                                                                       |       |  |   |                      |   |                                                          |   |                                         |   |                                   |   |                      |   |                                               |   |                      |   |                                      |   |                        |    |          |    |       |    |          |    |                         |    |                 |    |          |    |        |    |        |    |         |    |         |    |              |
| 3     | At CHU de Québec-Université Laval                                                            |                                                            |                                                                                                                                                                                                                                                                                                                                                                                                                                                                                                                                                                                                                                                                                                                                                                                                                                                                                                                                                       |       |  |   |                      |   |                                                          |   |                                         |   |                                   |   |                      |   |                                               |   |                      |   |                                      |   |                        |    |          |    |       |    |          |    |                         |    |                 |    |          |    |        |    |        |    |         |    |         |    |              |
| 4     | At CISSS de Laval                                                                            |                                                            |                                                                                                                                                                                                                                                                                                                                                                                                                                                                                                                                                                                                                                                                                                                                                                                                                                                                                                                                                       |       |  |   |                      |   |                                                          |   |                                         |   |                                   |   |                      |   |                                               |   |                      |   |                                      |   |                        |    |          |    |       |    |          |    |                         |    |                 |    |          |    |        |    |        |    |         |    |         |    |              |
| 5     | At CIUSS du Centre-Ouest-de-l'Île-de-Montréal                                                |                                                            |                                                                                                                                                                                                                                                                                                                                                                                                                                                                                                                                                                                                                                                                                                                                                                                                                                                                                                                                                       |       |  |   |                      |   |                                                          |   |                                         |   |                                   |   |                      |   |                                               |   |                      |   |                                      |   |                        |    |          |    |       |    |          |    |                         |    |                 |    |          |    |        |    |        |    |         |    |         |    |              |
| 6     | At CISSS de Gaspésie                                                                         |                                                            |                                                                                                                                                                                                                                                                                                                                                                                                                                                                                                                                                                                                                                                                                                                                                                                                                                                                                                                                                       |       |  |   |                      |   |                                                          |   |                                         |   |                                   |   |                      |   |                                               |   |                      |   |                                      |   |                        |    |          |    |       |    |          |    |                         |    |                 |    |          |    |        |    |        |    |         |    |         |    |              |
| 7     | At CIUSSS de Saguenay-Lac-Saint-Jean                                                         |                                                            |                                                                                                                                                                                                                                                                                                                                                                                                                                                                                                                                                                                                                                                                                                                                                                                                                                                                                                                                                       |       |  |   |                      |   |                                                          |   |                                         |   |                                   |   |                      |   |                                               |   |                      |   |                                      |   |                        |    |          |    |       |    |          |    |                         |    |                 |    |          |    |        |    |        |    |         |    |         |    |              |
| 8     | At CUSM                                                                                      |                                                            |                                                                                                                                                                                                                                                                                                                                                                                                                                                                                                                                                                                                                                                                                                                                                                                                                                                                                                                                                       |       |  |   |                      |   |                                                          |   |                                         |   |                                   |   |                      |   |                                               |   |                      |   |                                      |   |                        |    |          |    |       |    |          |    |                         |    |                 |    |          |    |        |    |        |    |         |    |         |    |              |
| 40    | ppa_suivi                                                                                    | Your medical follow-up took place in the context of :      | <table border="1"> <tr><td colspan="2">radio</td></tr> <tr><td>1</td><td>An episode of cancer</td></tr> <tr><td>2</td><td>A cancer episode that led to an oncogenetic consultation</td></tr> <tr><td>3</td><td>A consultation in oncogenetic</td></tr> </table> <p>Alignement personnalisé : LV</p>                                                                                                                                                                                                                                                                                                                                                                                                                                                                                                                                                                                                                                                   | radio |  | 1 | An episode of cancer | 2 | A cancer episode that led to an oncogenetic consultation | 3 | A consultation in oncogenetic           |   |                                   |   |                      |   |                                               |   |                      |   |                                      |   |                        |    |          |    |       |    |          |    |                         |    |                 |    |          |    |        |    |        |    |         |    |         |    |              |
| radio |                                                                                              |                                                            |                                                                                                                                                                                                                                                                                                                                                                                                                                                                                                                                                                                                                                                                                                                                                                                                                                                                                                                                                       |       |  |   |                      |   |                                                          |   |                                         |   |                                   |   |                      |   |                                               |   |                      |   |                                      |   |                        |    |          |    |       |    |          |    |                         |    |                 |    |          |    |        |    |        |    |         |    |         |    |              |
| 1     | An episode of cancer                                                                         |                                                            |                                                                                                                                                                                                                                                                                                                                                                                                                                                                                                                                                                                                                                                                                                                                                                                                                                                                                                                                                       |       |  |   |                      |   |                                                          |   |                                         |   |                                   |   |                      |   |                                               |   |                      |   |                                      |   |                        |    |          |    |       |    |          |    |                         |    |                 |    |          |    |        |    |        |    |         |    |         |    |              |
| 2     | A cancer episode that led to an oncogenetic consultation                                     |                                                            |                                                                                                                                                                                                                                                                                                                                                                                                                                                                                                                                                                                                                                                                                                                                                                                                                                                                                                                                                       |       |  |   |                      |   |                                                          |   |                                         |   |                                   |   |                      |   |                                               |   |                      |   |                                      |   |                        |    |          |    |       |    |          |    |                         |    |                 |    |          |    |        |    |        |    |         |    |         |    |              |
| 3     | A consultation in oncogenetic                                                                |                                                            |                                                                                                                                                                                                                                                                                                                                                                                                                                                                                                                                                                                                                                                                                                                                                                                                                                                                                                                                                       |       |  |   |                      |   |                                                          |   |                                         |   |                                   |   |                      |   |                                               |   |                      |   |                                      |   |                        |    |          |    |       |    |          |    |                         |    |                 |    |          |    |        |    |        |    |         |    |         |    |              |
| 41    | ppa_cancer<br>Afficher le champ UNIQUEM ENT si :<br>[ppa_suivi] = '1' or [ppa_suivi] = '2'   | What is the main type of cancer you have been treated for? | <table border="1"> <tr><td colspan="2">radio</td></tr> <tr><td>1</td><td>Oral cavity</td></tr> <tr><td>2</td><td>Brain</td></tr> <tr><td>3</td><td>Colorectal (colon, rectum)</td></tr> <tr><td>4</td><td>Cervix</td></tr> <tr><td>5</td><td>Endometrium / Uterus</td></tr> <tr><td>6</td><td>Stomach / Esophagus</td></tr> <tr><td>7</td><td>Liver</td></tr> <tr><td>8</td><td>Leukemia</td></tr> <tr><td>9</td><td>Non-Hodgkin's lymphoma</td></tr> <tr><td>10</td><td>Melanoma</td></tr> <tr><td>11</td><td>Ovary</td></tr> <tr><td>12</td><td>Pancreas</td></tr> <tr><td>13</td><td>Skin (without melanoma)</td></tr> <tr><td>14</td><td>Lung / Bronchus</td></tr> <tr><td>15</td><td>Prostate</td></tr> <tr><td>16</td><td>Kidney</td></tr> <tr><td>17</td><td>Breast</td></tr> <tr><td>18</td><td>Thyroid</td></tr> <tr><td>19</td><td>Bladder</td></tr> <tr><td>20</td><td>Other cancer</td></tr> </table> <p>Alignement personnalisé : LV</p> | radio |  | 1 | Oral cavity          | 2 | Brain                                                    | 3 | Colorectal (colon, rectum)              | 4 | Cervix                            | 5 | Endometrium / Uterus | 6 | Stomach / Esophagus                           | 7 | Liver                | 8 | Leukemia                             | 9 | Non-Hodgkin's lymphoma | 10 | Melanoma | 11 | Ovary | 12 | Pancreas | 13 | Skin (without melanoma) | 14 | Lung / Bronchus | 15 | Prostate | 16 | Kidney | 17 | Breast | 18 | Thyroid | 19 | Bladder | 20 | Other cancer |
| radio |                                                                                              |                                                            |                                                                                                                                                                                                                                                                                                                                                                                                                                                                                                                                                                                                                                                                                                                                                                                                                                                                                                                                                       |       |  |   |                      |   |                                                          |   |                                         |   |                                   |   |                      |   |                                               |   |                      |   |                                      |   |                        |    |          |    |       |    |          |    |                         |    |                 |    |          |    |        |    |        |    |         |    |         |    |              |
| 1     | Oral cavity                                                                                  |                                                            |                                                                                                                                                                                                                                                                                                                                                                                                                                                                                                                                                                                                                                                                                                                                                                                                                                                                                                                                                       |       |  |   |                      |   |                                                          |   |                                         |   |                                   |   |                      |   |                                               |   |                      |   |                                      |   |                        |    |          |    |       |    |          |    |                         |    |                 |    |          |    |        |    |        |    |         |    |         |    |              |
| 2     | Brain                                                                                        |                                                            |                                                                                                                                                                                                                                                                                                                                                                                                                                                                                                                                                                                                                                                                                                                                                                                                                                                                                                                                                       |       |  |   |                      |   |                                                          |   |                                         |   |                                   |   |                      |   |                                               |   |                      |   |                                      |   |                        |    |          |    |       |    |          |    |                         |    |                 |    |          |    |        |    |        |    |         |    |         |    |              |
| 3     | Colorectal (colon, rectum)                                                                   |                                                            |                                                                                                                                                                                                                                                                                                                                                                                                                                                                                                                                                                                                                                                                                                                                                                                                                                                                                                                                                       |       |  |   |                      |   |                                                          |   |                                         |   |                                   |   |                      |   |                                               |   |                      |   |                                      |   |                        |    |          |    |       |    |          |    |                         |    |                 |    |          |    |        |    |        |    |         |    |         |    |              |
| 4     | Cervix                                                                                       |                                                            |                                                                                                                                                                                                                                                                                                                                                                                                                                                                                                                                                                                                                                                                                                                                                                                                                                                                                                                                                       |       |  |   |                      |   |                                                          |   |                                         |   |                                   |   |                      |   |                                               |   |                      |   |                                      |   |                        |    |          |    |       |    |          |    |                         |    |                 |    |          |    |        |    |        |    |         |    |         |    |              |
| 5     | Endometrium / Uterus                                                                         |                                                            |                                                                                                                                                                                                                                                                                                                                                                                                                                                                                                                                                                                                                                                                                                                                                                                                                                                                                                                                                       |       |  |   |                      |   |                                                          |   |                                         |   |                                   |   |                      |   |                                               |   |                      |   |                                      |   |                        |    |          |    |       |    |          |    |                         |    |                 |    |          |    |        |    |        |    |         |    |         |    |              |
| 6     | Stomach / Esophagus                                                                          |                                                            |                                                                                                                                                                                                                                                                                                                                                                                                                                                                                                                                                                                                                                                                                                                                                                                                                                                                                                                                                       |       |  |   |                      |   |                                                          |   |                                         |   |                                   |   |                      |   |                                               |   |                      |   |                                      |   |                        |    |          |    |       |    |          |    |                         |    |                 |    |          |    |        |    |        |    |         |    |         |    |              |
| 7     | Liver                                                                                        |                                                            |                                                                                                                                                                                                                                                                                                                                                                                                                                                                                                                                                                                                                                                                                                                                                                                                                                                                                                                                                       |       |  |   |                      |   |                                                          |   |                                         |   |                                   |   |                      |   |                                               |   |                      |   |                                      |   |                        |    |          |    |       |    |          |    |                         |    |                 |    |          |    |        |    |        |    |         |    |         |    |              |
| 8     | Leukemia                                                                                     |                                                            |                                                                                                                                                                                                                                                                                                                                                                                                                                                                                                                                                                                                                                                                                                                                                                                                                                                                                                                                                       |       |  |   |                      |   |                                                          |   |                                         |   |                                   |   |                      |   |                                               |   |                      |   |                                      |   |                        |    |          |    |       |    |          |    |                         |    |                 |    |          |    |        |    |        |    |         |    |         |    |              |
| 9     | Non-Hodgkin's lymphoma                                                                       |                                                            |                                                                                                                                                                                                                                                                                                                                                                                                                                                                                                                                                                                                                                                                                                                                                                                                                                                                                                                                                       |       |  |   |                      |   |                                                          |   |                                         |   |                                   |   |                      |   |                                               |   |                      |   |                                      |   |                        |    |          |    |       |    |          |    |                         |    |                 |    |          |    |        |    |        |    |         |    |         |    |              |
| 10    | Melanoma                                                                                     |                                                            |                                                                                                                                                                                                                                                                                                                                                                                                                                                                                                                                                                                                                                                                                                                                                                                                                                                                                                                                                       |       |  |   |                      |   |                                                          |   |                                         |   |                                   |   |                      |   |                                               |   |                      |   |                                      |   |                        |    |          |    |       |    |          |    |                         |    |                 |    |          |    |        |    |        |    |         |    |         |    |              |
| 11    | Ovary                                                                                        |                                                            |                                                                                                                                                                                                                                                                                                                                                                                                                                                                                                                                                                                                                                                                                                                                                                                                                                                                                                                                                       |       |  |   |                      |   |                                                          |   |                                         |   |                                   |   |                      |   |                                               |   |                      |   |                                      |   |                        |    |          |    |       |    |          |    |                         |    |                 |    |          |    |        |    |        |    |         |    |         |    |              |
| 12    | Pancreas                                                                                     |                                                            |                                                                                                                                                                                                                                                                                                                                                                                                                                                                                                                                                                                                                                                                                                                                                                                                                                                                                                                                                       |       |  |   |                      |   |                                                          |   |                                         |   |                                   |   |                      |   |                                               |   |                      |   |                                      |   |                        |    |          |    |       |    |          |    |                         |    |                 |    |          |    |        |    |        |    |         |    |         |    |              |
| 13    | Skin (without melanoma)                                                                      |                                                            |                                                                                                                                                                                                                                                                                                                                                                                                                                                                                                                                                                                                                                                                                                                                                                                                                                                                                                                                                       |       |  |   |                      |   |                                                          |   |                                         |   |                                   |   |                      |   |                                               |   |                      |   |                                      |   |                        |    |          |    |       |    |          |    |                         |    |                 |    |          |    |        |    |        |    |         |    |         |    |              |
| 14    | Lung / Bronchus                                                                              |                                                            |                                                                                                                                                                                                                                                                                                                                                                                                                                                                                                                                                                                                                                                                                                                                                                                                                                                                                                                                                       |       |  |   |                      |   |                                                          |   |                                         |   |                                   |   |                      |   |                                               |   |                      |   |                                      |   |                        |    |          |    |       |    |          |    |                         |    |                 |    |          |    |        |    |        |    |         |    |         |    |              |
| 15    | Prostate                                                                                     |                                                            |                                                                                                                                                                                                                                                                                                                                                                                                                                                                                                                                                                                                                                                                                                                                                                                                                                                                                                                                                       |       |  |   |                      |   |                                                          |   |                                         |   |                                   |   |                      |   |                                               |   |                      |   |                                      |   |                        |    |          |    |       |    |          |    |                         |    |                 |    |          |    |        |    |        |    |         |    |         |    |              |
| 16    | Kidney                                                                                       |                                                            |                                                                                                                                                                                                                                                                                                                                                                                                                                                                                                                                                                                                                                                                                                                                                                                                                                                                                                                                                       |       |  |   |                      |   |                                                          |   |                                         |   |                                   |   |                      |   |                                               |   |                      |   |                                      |   |                        |    |          |    |       |    |          |    |                         |    |                 |    |          |    |        |    |        |    |         |    |         |    |              |
| 17    | Breast                                                                                       |                                                            |                                                                                                                                                                                                                                                                                                                                                                                                                                                                                                                                                                                                                                                                                                                                                                                                                                                                                                                                                       |       |  |   |                      |   |                                                          |   |                                         |   |                                   |   |                      |   |                                               |   |                      |   |                                      |   |                        |    |          |    |       |    |          |    |                         |    |                 |    |          |    |        |    |        |    |         |    |         |    |              |
| 18    | Thyroid                                                                                      |                                                            |                                                                                                                                                                                                                                                                                                                                                                                                                                                                                                                                                                                                                                                                                                                                                                                                                                                                                                                                                       |       |  |   |                      |   |                                                          |   |                                         |   |                                   |   |                      |   |                                               |   |                      |   |                                      |   |                        |    |          |    |       |    |          |    |                         |    |                 |    |          |    |        |    |        |    |         |    |         |    |              |
| 19    | Bladder                                                                                      |                                                            |                                                                                                                                                                                                                                                                                                                                                                                                                                                                                                                                                                                                                                                                                                                                                                                                                                                                                                                                                       |       |  |   |                      |   |                                                          |   |                                         |   |                                   |   |                      |   |                                               |   |                      |   |                                      |   |                        |    |          |    |       |    |          |    |                         |    |                 |    |          |    |        |    |        |    |         |    |         |    |              |
| 20    | Other cancer                                                                                 |                                                            |                                                                                                                                                                                                                                                                                                                                                                                                                                                                                                                                                                                                                                                                                                                                                                                                                                                                                                                                                       |       |  |   |                      |   |                                                          |   |                                         |   |                                   |   |                      |   |                                               |   |                      |   |                                      |   |                        |    |          |    |       |    |          |    |                         |    |                 |    |          |    |        |    |        |    |         |    |         |    |              |
| 42    | ppa_cancerautre<br>Afficher le champ UNIQUEM ENT si :<br>[ppa_cancer] = '20'                 | If other cancer, specify the type of cancer:               | text<br>Alignement personnalisé : LV                                                                                                                                                                                                                                                                                                                                                                                                                                                                                                                                                                                                                                                                                                                                                                                                                                                                                                                  |       |  |   |                      |   |                                                          |   |                                         |   |                                   |   |                      |   |                                               |   |                      |   |                                      |   |                        |    |          |    |       |    |          |    |                         |    |                 |    |          |    |        |    |        |    |         |    |         |    |              |
| 43    | ppa_metasta<br>Afficher le champ UNIQUEM ENT si :<br>[ppa_suivi] = '1' or [ppa_suivi] = '2'  | Is it a metastatic cancer?                                 | <table border="1"> <tr><td colspan="2">radio</td></tr> <tr><td>0</td><td>No</td></tr> <tr><td>1</td><td>Yes</td></tr> </table>                                                                                                                                                                                                                                                                                                                                                                                                                                                                                                                                                                                                                                                                                                                                                                                                                        | radio |  | 0 | No                   | 1 | Yes                                                      |   |                                         |   |                                   |   |                      |   |                                               |   |                      |   |                                      |   |                        |    |          |    |       |    |          |    |                         |    |                 |    |          |    |        |    |        |    |         |    |         |    |              |
| radio |                                                                                              |                                                            |                                                                                                                                                                                                                                                                                                                                                                                                                                                                                                                                                                                                                                                                                                                                                                                                                                                                                                                                                       |       |  |   |                      |   |                                                          |   |                                         |   |                                   |   |                      |   |                                               |   |                      |   |                                      |   |                        |    |          |    |       |    |          |    |                         |    |                 |    |          |    |        |    |        |    |         |    |         |    |              |
| 0     | No                                                                                           |                                                            |                                                                                                                                                                                                                                                                                                                                                                                                                                                                                                                                                                                                                                                                                                                                                                                                                                                                                                                                                       |       |  |   |                      |   |                                                          |   |                                         |   |                                   |   |                      |   |                                               |   |                      |   |                                      |   |                        |    |          |    |       |    |          |    |                         |    |                 |    |          |    |        |    |        |    |         |    |         |    |              |
| 1     | Yes                                                                                          |                                                            |                                                                                                                                                                                                                                                                                                                                                                                                                                                                                                                                                                                                                                                                                                                                                                                                                                                                                                                                                       |       |  |   |                      |   |                                                          |   |                                         |   |                                   |   |                      |   |                                               |   |                      |   |                                      |   |                        |    |          |    |       |    |          |    |                         |    |                 |    |          |    |        |    |        |    |         |    |         |    |              |
| 44    | ppa_canceran<br>Afficher le champ UNIQUEM ENT si :<br>[ppa_suivi] = '1' or [ppa_suivi] = '2' | In what year were you diagnosed with this cancer?          | text (number, Min. : 1950, Max. : 2021)<br>Alignement personnalisé : LV                                                                                                                                                                                                                                                                                                                                                                                                                                                                                                                                                                                                                                                                                                                                                                                                                                                                               |       |  |   |                      |   |                                                          |   |                                         |   |                                   |   |                      |   |                                               |   |                      |   |                                      |   |                        |    |          |    |       |    |          |    |                         |    |                 |    |          |    |        |    |        |    |         |    |         |    |              |

|    |                                                                                                                   |                                                                                                                             |                                                                                                                                                                                                                                                                                                                                                                                                                                                                                                                                                                                                                                                                                                                                                                                                                                                                                                                                                                                                                                                                                                                                                                                     |   |                                                               |                                 |                                                            |              |                                                                                            |   |                                                              |                                 |                                                                                                         |              |                               |   |              |                                                                                        |   |              |                                                         |   |              |                        |   |              |                             |   |              |               |    |               |                      |    |               |            |    |               |                 |
|----|-------------------------------------------------------------------------------------------------------------------|-----------------------------------------------------------------------------------------------------------------------------|-------------------------------------------------------------------------------------------------------------------------------------------------------------------------------------------------------------------------------------------------------------------------------------------------------------------------------------------------------------------------------------------------------------------------------------------------------------------------------------------------------------------------------------------------------------------------------------------------------------------------------------------------------------------------------------------------------------------------------------------------------------------------------------------------------------------------------------------------------------------------------------------------------------------------------------------------------------------------------------------------------------------------------------------------------------------------------------------------------------------------------------------------------------------------------------|---|---------------------------------------------------------------|---------------------------------|------------------------------------------------------------|--------------|--------------------------------------------------------------------------------------------|---|--------------------------------------------------------------|---------------------------------|---------------------------------------------------------------------------------------------------------|--------------|-------------------------------|---|--------------|----------------------------------------------------------------------------------------|---|--------------|---------------------------------------------------------|---|--------------|------------------------|---|--------------|-----------------------------|---|--------------|---------------|----|---------------|----------------------|----|---------------|------------|----|---------------|-----------------|
| 45 | <p>ppa_trait</p> <p>Afficher le champ UNIQUEM<br/>ENT si :<br/>[ppa_suivi] = '1' or [ppa_suivi] = '2'</p>         | <p>What type of treatment or surgery have you received (check all that apply)?</p>                                          | <p>checkbox</p> <table border="1" data-bbox="1023 109 1493 757"> <tr> <td>1</td> <td>ppa_trait__1</td> <td>Vein Chemotherapy (Intravenous)</td> </tr> <tr> <td>2</td> <td>ppa_trait__2</td> <td>Chemotherapy with swallowable tablets</td> </tr> <tr> <td>3</td> <td>ppa_trait__3</td> <td>Hormonal therapy (antihormones)</td> </tr> <tr> <td>4</td> <td>ppa_trait__4</td> <td>Radiotherapy or brachytherapy</td> </tr> <tr> <td>5</td> <td>ppa_trait__5</td> <td>Partial Surgery (remove the tumor while preserving as much healthy tissue as possible)</td> </tr> <tr> <td>6</td> <td>ppa_trait__6</td> <td>Complete Surgery (completely remove the affected organ)</td> </tr> <tr> <td>7</td> <td>ppa_trait__7</td> <td>Reconstructive surgery</td> </tr> <tr> <td>8</td> <td>ppa_trait__8</td> <td>Transplantation or grafting</td> </tr> <tr> <td>9</td> <td>ppa_trait__9</td> <td>Immunotherapy</td> </tr> <tr> <td>10</td> <td>ppa_trait__10</td> <td>Alternative Medicine</td> </tr> <tr> <td>11</td> <td>ppa_trait__11</td> <td>Don't know</td> </tr> <tr> <td>12</td> <td>ppa_trait__12</td> <td>Other treatment</td> </tr> </table> <p>Alignement personnalisé : LV</p> | 1 | ppa_trait__1                                                  | Vein Chemotherapy (Intravenous) | 2                                                          | ppa_trait__2 | Chemotherapy with swallowable tablets                                                      | 3 | ppa_trait__3                                                 | Hormonal therapy (antihormones) | 4                                                                                                       | ppa_trait__4 | Radiotherapy or brachytherapy | 5 | ppa_trait__5 | Partial Surgery (remove the tumor while preserving as much healthy tissue as possible) | 6 | ppa_trait__6 | Complete Surgery (completely remove the affected organ) | 7 | ppa_trait__7 | Reconstructive surgery | 8 | ppa_trait__8 | Transplantation or grafting | 9 | ppa_trait__9 | Immunotherapy | 10 | ppa_trait__10 | Alternative Medicine | 11 | ppa_trait__11 | Don't know | 12 | ppa_trait__12 | Other treatment |
| 1  | ppa_trait__1                                                                                                      | Vein Chemotherapy (Intravenous)                                                                                             |                                                                                                                                                                                                                                                                                                                                                                                                                                                                                                                                                                                                                                                                                                                                                                                                                                                                                                                                                                                                                                                                                                                                                                                     |   |                                                               |                                 |                                                            |              |                                                                                            |   |                                                              |                                 |                                                                                                         |              |                               |   |              |                                                                                        |   |              |                                                         |   |              |                        |   |              |                             |   |              |               |    |               |                      |    |               |            |    |               |                 |
| 2  | ppa_trait__2                                                                                                      | Chemotherapy with swallowable tablets                                                                                       |                                                                                                                                                                                                                                                                                                                                                                                                                                                                                                                                                                                                                                                                                                                                                                                                                                                                                                                                                                                                                                                                                                                                                                                     |   |                                                               |                                 |                                                            |              |                                                                                            |   |                                                              |                                 |                                                                                                         |              |                               |   |              |                                                                                        |   |              |                                                         |   |              |                        |   |              |                             |   |              |               |    |               |                      |    |               |            |    |               |                 |
| 3  | ppa_trait__3                                                                                                      | Hormonal therapy (antihormones)                                                                                             |                                                                                                                                                                                                                                                                                                                                                                                                                                                                                                                                                                                                                                                                                                                                                                                                                                                                                                                                                                                                                                                                                                                                                                                     |   |                                                               |                                 |                                                            |              |                                                                                            |   |                                                              |                                 |                                                                                                         |              |                               |   |              |                                                                                        |   |              |                                                         |   |              |                        |   |              |                             |   |              |               |    |               |                      |    |               |            |    |               |                 |
| 4  | ppa_trait__4                                                                                                      | Radiotherapy or brachytherapy                                                                                               |                                                                                                                                                                                                                                                                                                                                                                                                                                                                                                                                                                                                                                                                                                                                                                                                                                                                                                                                                                                                                                                                                                                                                                                     |   |                                                               |                                 |                                                            |              |                                                                                            |   |                                                              |                                 |                                                                                                         |              |                               |   |              |                                                                                        |   |              |                                                         |   |              |                        |   |              |                             |   |              |               |    |               |                      |    |               |            |    |               |                 |
| 5  | ppa_trait__5                                                                                                      | Partial Surgery (remove the tumor while preserving as much healthy tissue as possible)                                      |                                                                                                                                                                                                                                                                                                                                                                                                                                                                                                                                                                                                                                                                                                                                                                                                                                                                                                                                                                                                                                                                                                                                                                                     |   |                                                               |                                 |                                                            |              |                                                                                            |   |                                                              |                                 |                                                                                                         |              |                               |   |              |                                                                                        |   |              |                                                         |   |              |                        |   |              |                             |   |              |               |    |               |                      |    |               |            |    |               |                 |
| 6  | ppa_trait__6                                                                                                      | Complete Surgery (completely remove the affected organ)                                                                     |                                                                                                                                                                                                                                                                                                                                                                                                                                                                                                                                                                                                                                                                                                                                                                                                                                                                                                                                                                                                                                                                                                                                                                                     |   |                                                               |                                 |                                                            |              |                                                                                            |   |                                                              |                                 |                                                                                                         |              |                               |   |              |                                                                                        |   |              |                                                         |   |              |                        |   |              |                             |   |              |               |    |               |                      |    |               |            |    |               |                 |
| 7  | ppa_trait__7                                                                                                      | Reconstructive surgery                                                                                                      |                                                                                                                                                                                                                                                                                                                                                                                                                                                                                                                                                                                                                                                                                                                                                                                                                                                                                                                                                                                                                                                                                                                                                                                     |   |                                                               |                                 |                                                            |              |                                                                                            |   |                                                              |                                 |                                                                                                         |              |                               |   |              |                                                                                        |   |              |                                                         |   |              |                        |   |              |                             |   |              |               |    |               |                      |    |               |            |    |               |                 |
| 8  | ppa_trait__8                                                                                                      | Transplantation or grafting                                                                                                 |                                                                                                                                                                                                                                                                                                                                                                                                                                                                                                                                                                                                                                                                                                                                                                                                                                                                                                                                                                                                                                                                                                                                                                                     |   |                                                               |                                 |                                                            |              |                                                                                            |   |                                                              |                                 |                                                                                                         |              |                               |   |              |                                                                                        |   |              |                                                         |   |              |                        |   |              |                             |   |              |               |    |               |                      |    |               |            |    |               |                 |
| 9  | ppa_trait__9                                                                                                      | Immunotherapy                                                                                                               |                                                                                                                                                                                                                                                                                                                                                                                                                                                                                                                                                                                                                                                                                                                                                                                                                                                                                                                                                                                                                                                                                                                                                                                     |   |                                                               |                                 |                                                            |              |                                                                                            |   |                                                              |                                 |                                                                                                         |              |                               |   |              |                                                                                        |   |              |                                                         |   |              |                        |   |              |                             |   |              |               |    |               |                      |    |               |            |    |               |                 |
| 10 | ppa_trait__10                                                                                                     | Alternative Medicine                                                                                                        |                                                                                                                                                                                                                                                                                                                                                                                                                                                                                                                                                                                                                                                                                                                                                                                                                                                                                                                                                                                                                                                                                                                                                                                     |   |                                                               |                                 |                                                            |              |                                                                                            |   |                                                              |                                 |                                                                                                         |              |                               |   |              |                                                                                        |   |              |                                                         |   |              |                        |   |              |                             |   |              |               |    |               |                      |    |               |            |    |               |                 |
| 11 | ppa_trait__11                                                                                                     | Don't know                                                                                                                  |                                                                                                                                                                                                                                                                                                                                                                                                                                                                                                                                                                                                                                                                                                                                                                                                                                                                                                                                                                                                                                                                                                                                                                                     |   |                                                               |                                 |                                                            |              |                                                                                            |   |                                                              |                                 |                                                                                                         |              |                               |   |              |                                                                                        |   |              |                                                         |   |              |                        |   |              |                             |   |              |               |    |               |                      |    |               |            |    |               |                 |
| 12 | ppa_trait__12                                                                                                     | Other treatment                                                                                                             |                                                                                                                                                                                                                                                                                                                                                                                                                                                                                                                                                                                                                                                                                                                                                                                                                                                                                                                                                                                                                                                                                                                                                                                     |   |                                                               |                                 |                                                            |              |                                                                                            |   |                                                              |                                 |                                                                                                         |              |                               |   |              |                                                                                        |   |              |                                                         |   |              |                        |   |              |                             |   |              |               |    |               |                      |    |               |            |    |               |                 |
| 46 | <p>ppa_traitautre</p> <p>Afficher le champ UNIQUEM<br/>ENT si :<br/>[ppa_trait(12)] = '1'</p>                     | <p>What other treatment have you received?</p>                                                                              | <p>text</p> <p>Alignement personnalisé : LV</p>                                                                                                                                                                                                                                                                                                                                                                                                                                                                                                                                                                                                                                                                                                                                                                                                                                                                                                                                                                                                                                                                                                                                     |   |                                                               |                                 |                                                            |              |                                                                                            |   |                                                              |                                 |                                                                                                         |              |                               |   |              |                                                                                        |   |              |                                                         |   |              |                        |   |              |                             |   |              |               |    |               |                      |    |               |            |    |               |                 |
| 47 | <p>ppa_traitementfin</p> <p>Afficher le champ UNIQUEM<br/>ENT si :<br/>[ppa_suivi] = '1' or [ppa_suivi] = '2'</p> | <p>Your last treatment ended :</p>                                                                                          | <p>radio</p> <table border="1" data-bbox="1023 981 1398 1216"> <tr> <td>1</td> <td>Less than one year ago</td> </tr> <tr> <td>2</td> <td>Between 1 and 3 years ago</td> </tr> <tr> <td>3</td> <td>Between 4 and 5 years ago</td> </tr> <tr> <td>4</td> <td>More than 5 years ago</td> </tr> <tr> <td>5</td> <td>Does not apply, I am still in treatment</td> </tr> <tr> <td>6</td> <td>Don't know</td> </tr> </table> <p>Alignement personnalisé : LV</p>                                                                                                                                                                                                                                                                                                                                                                                                                                                                                                                                                                                                                                                                                                                           | 1 | Less than one year ago                                        | 2                               | Between 1 and 3 years ago                                  | 3            | Between 4 and 5 years ago                                                                  | 4 | More than 5 years ago                                        | 5                               | Does not apply, I am still in treatment                                                                 | 6            | Don't know                    |   |              |                                                                                        |   |              |                                                         |   |              |                        |   |              |                             |   |              |               |    |               |                      |    |               |            |    |               |                 |
| 1  | Less than one year ago                                                                                            |                                                                                                                             |                                                                                                                                                                                                                                                                                                                                                                                                                                                                                                                                                                                                                                                                                                                                                                                                                                                                                                                                                                                                                                                                                                                                                                                     |   |                                                               |                                 |                                                            |              |                                                                                            |   |                                                              |                                 |                                                                                                         |              |                               |   |              |                                                                                        |   |              |                                                         |   |              |                        |   |              |                             |   |              |               |    |               |                      |    |               |            |    |               |                 |
| 2  | Between 1 and 3 years ago                                                                                         |                                                                                                                             |                                                                                                                                                                                                                                                                                                                                                                                                                                                                                                                                                                                                                                                                                                                                                                                                                                                                                                                                                                                                                                                                                                                                                                                     |   |                                                               |                                 |                                                            |              |                                                                                            |   |                                                              |                                 |                                                                                                         |              |                               |   |              |                                                                                        |   |              |                                                         |   |              |                        |   |              |                             |   |              |               |    |               |                      |    |               |            |    |               |                 |
| 3  | Between 4 and 5 years ago                                                                                         |                                                                                                                             |                                                                                                                                                                                                                                                                                                                                                                                                                                                                                                                                                                                                                                                                                                                                                                                                                                                                                                                                                                                                                                                                                                                                                                                     |   |                                                               |                                 |                                                            |              |                                                                                            |   |                                                              |                                 |                                                                                                         |              |                               |   |              |                                                                                        |   |              |                                                         |   |              |                        |   |              |                             |   |              |               |    |               |                      |    |               |            |    |               |                 |
| 4  | More than 5 years ago                                                                                             |                                                                                                                             |                                                                                                                                                                                                                                                                                                                                                                                                                                                                                                                                                                                                                                                                                                                                                                                                                                                                                                                                                                                                                                                                                                                                                                                     |   |                                                               |                                 |                                                            |              |                                                                                            |   |                                                              |                                 |                                                                                                         |              |                               |   |              |                                                                                        |   |              |                                                         |   |              |                        |   |              |                             |   |              |               |    |               |                      |    |               |            |    |               |                 |
| 5  | Does not apply, I am still in treatment                                                                           |                                                                                                                             |                                                                                                                                                                                                                                                                                                                                                                                                                                                                                                                                                                                                                                                                                                                                                                                                                                                                                                                                                                                                                                                                                                                                                                                     |   |                                                               |                                 |                                                            |              |                                                                                            |   |                                                              |                                 |                                                                                                         |              |                               |   |              |                                                                                        |   |              |                                                         |   |              |                        |   |              |                             |   |              |               |    |               |                      |    |               |            |    |               |                 |
| 6  | Don't know                                                                                                        |                                                                                                                             |                                                                                                                                                                                                                                                                                                                                                                                                                                                                                                                                                                                                                                                                                                                                                                                                                                                                                                                                                                                                                                                                                                                                                                                     |   |                                                               |                                 |                                                            |              |                                                                                            |   |                                                              |                                 |                                                                                                         |              |                               |   |              |                                                                                        |   |              |                                                         |   |              |                        |   |              |                             |   |              |               |    |               |                      |    |               |            |    |               |                 |
| 48 | <p>ppa_traitfin5</p> <p>Afficher le champ UNIQUEM<br/>ENT si :<br/>[ppa_traitementfin] = '4'</p>                  | <p>If your last treatment was completed more than 5 years ago, please indicate the number of years</p>                      | <p>text</p> <p>Alignement personnalisé : LV</p>                                                                                                                                                                                                                                                                                                                                                                                                                                                                                                                                                                                                                                                                                                                                                                                                                                                                                                                                                                                                                                                                                                                                     |   |                                                               |                                 |                                                            |              |                                                                                            |   |                                                              |                                 |                                                                                                         |              |                               |   |              |                                                                                        |   |              |                                                         |   |              |                        |   |              |                             |   |              |               |    |               |                      |    |               |            |    |               |                 |
| 49 | <p>ppa_motifgen</p> <p>Afficher le champ UNIQUEM<br/>ENT si :<br/>[ppa_suivi] = '2' or [ppa_suivi] = '3'</p>      | <p>Why did you consult in oncogenetic OR genetic testing?</p>                                                               | <p>radio</p> <table border="1" data-bbox="1023 1440 1493 1697"> <tr> <td>1</td> <td>Therapeutic decision (surgical decision or targeted therapy)</td> </tr> <tr> <td>2</td> <td>To find out my genetic status following a cancer diagnosis</td> </tr> <tr> <td>3</td> <td>To know my genetic status following the identification of a genetic mutation in the family</td> </tr> <tr> <td>5</td> <td>To know my genetic status due to my family history of cancer</td> </tr> </table> <p>Alignement personnalisé : LV</p>                                                                                                                                                                                                                                                                                                                                                                                                                                                                                                                                                                                                                                                            | 1 | Therapeutic decision (surgical decision or targeted therapy)  | 2                               | To find out my genetic status following a cancer diagnosis | 3            | To know my genetic status following the identification of a genetic mutation in the family | 5 | To know my genetic status due to my family history of cancer |                                 |                                                                                                         |              |                               |   |              |                                                                                        |   |              |                                                         |   |              |                        |   |              |                             |   |              |               |    |               |                      |    |               |            |    |               |                 |
| 1  | Therapeutic decision (surgical decision or targeted therapy)                                                      |                                                                                                                             |                                                                                                                                                                                                                                                                                                                                                                                                                                                                                                                                                                                                                                                                                                                                                                                                                                                                                                                                                                                                                                                                                                                                                                                     |   |                                                               |                                 |                                                            |              |                                                                                            |   |                                                              |                                 |                                                                                                         |              |                               |   |              |                                                                                        |   |              |                                                         |   |              |                        |   |              |                             |   |              |               |    |               |                      |    |               |            |    |               |                 |
| 2  | To find out my genetic status following a cancer diagnosis                                                        |                                                                                                                             |                                                                                                                                                                                                                                                                                                                                                                                                                                                                                                                                                                                                                                                                                                                                                                                                                                                                                                                                                                                                                                                                                                                                                                                     |   |                                                               |                                 |                                                            |              |                                                                                            |   |                                                              |                                 |                                                                                                         |              |                               |   |              |                                                                                        |   |              |                                                         |   |              |                        |   |              |                             |   |              |               |    |               |                      |    |               |            |    |               |                 |
| 3  | To know my genetic status following the identification of a genetic mutation in the family                        |                                                                                                                             |                                                                                                                                                                                                                                                                                                                                                                                                                                                                                                                                                                                                                                                                                                                                                                                                                                                                                                                                                                                                                                                                                                                                                                                     |   |                                                               |                                 |                                                            |              |                                                                                            |   |                                                              |                                 |                                                                                                         |              |                               |   |              |                                                                                        |   |              |                                                         |   |              |                        |   |              |                             |   |              |               |    |               |                      |    |               |            |    |               |                 |
| 5  | To know my genetic status due to my family history of cancer                                                      |                                                                                                                             |                                                                                                                                                                                                                                                                                                                                                                                                                                                                                                                                                                                                                                                                                                                                                                                                                                                                                                                                                                                                                                                                                                                                                                                     |   |                                                               |                                 |                                                            |              |                                                                                            |   |                                                              |                                 |                                                                                                         |              |                               |   |              |                                                                                        |   |              |                                                         |   |              |                        |   |              |                             |   |              |               |    |               |                      |    |               |            |    |               |                 |
| 50 | <p>ppa_etapegen</p> <p>Afficher le champ UNIQUEM<br/>ENT si :<br/>[ppa_suivi] = '2' or [ppa_suivi] = '3'</p>      | <p>At the time of answering this questionnaire, which step best describes where you are in your oncogenetic trajectory?</p> | <p>radio</p> <table border="1" data-bbox="1023 1792 1493 2089"> <tr> <td>1</td> <td>You have just attended an information meeting in oncogenetics</td> </tr> <tr> <td>2</td> <td>You are waiting for the result of your genetic test</td> </tr> <tr> <td>3</td> <td>You are not a carrier of a genetic mutation</td> </tr> <tr> <td>4</td> <td>You are a carrier of a genetic mutation</td> </tr> <tr> <td>5</td> <td>You are a carrier of a genetic mutation and you have had preventive surgery on your breasts or ovaries.</td> </tr> </table> <p>Alignement personnalisé : LV</p>                                                                                                                                                                                                                                                                                                                                                                                                                                                                                                                                                                                               | 1 | You have just attended an information meeting in oncogenetics | 2                               | You are waiting for the result of your genetic test        | 3            | You are not a carrier of a genetic mutation                                                | 4 | You are a carrier of a genetic mutation                      | 5                               | You are a carrier of a genetic mutation and you have had preventive surgery on your breasts or ovaries. |              |                               |   |              |                                                                                        |   |              |                                                         |   |              |                        |   |              |                             |   |              |               |    |               |                      |    |               |            |    |               |                 |
| 1  | You have just attended an information meeting in oncogenetics                                                     |                                                                                                                             |                                                                                                                                                                                                                                                                                                                                                                                                                                                                                                                                                                                                                                                                                                                                                                                                                                                                                                                                                                                                                                                                                                                                                                                     |   |                                                               |                                 |                                                            |              |                                                                                            |   |                                                              |                                 |                                                                                                         |              |                               |   |              |                                                                                        |   |              |                                                         |   |              |                        |   |              |                             |   |              |               |    |               |                      |    |               |            |    |               |                 |
| 2  | You are waiting for the result of your genetic test                                                               |                                                                                                                             |                                                                                                                                                                                                                                                                                                                                                                                                                                                                                                                                                                                                                                                                                                                                                                                                                                                                                                                                                                                                                                                                                                                                                                                     |   |                                                               |                                 |                                                            |              |                                                                                            |   |                                                              |                                 |                                                                                                         |              |                               |   |              |                                                                                        |   |              |                                                         |   |              |                        |   |              |                             |   |              |               |    |               |                      |    |               |            |    |               |                 |
| 3  | You are not a carrier of a genetic mutation                                                                       |                                                                                                                             |                                                                                                                                                                                                                                                                                                                                                                                                                                                                                                                                                                                                                                                                                                                                                                                                                                                                                                                                                                                                                                                                                                                                                                                     |   |                                                               |                                 |                                                            |              |                                                                                            |   |                                                              |                                 |                                                                                                         |              |                               |   |              |                                                                                        |   |              |                                                         |   |              |                        |   |              |                             |   |              |               |    |               |                      |    |               |            |    |               |                 |
| 4  | You are a carrier of a genetic mutation                                                                           |                                                                                                                             |                                                                                                                                                                                                                                                                                                                                                                                                                                                                                                                                                                                                                                                                                                                                                                                                                                                                                                                                                                                                                                                                                                                                                                                     |   |                                                               |                                 |                                                            |              |                                                                                            |   |                                                              |                                 |                                                                                                         |              |                               |   |              |                                                                                        |   |              |                                                         |   |              |                        |   |              |                             |   |              |               |    |               |                      |    |               |            |    |               |                 |
| 5  | You are a carrier of a genetic mutation and you have had preventive surgery on your breasts or ovaries.           |                                                                                                                             |                                                                                                                                                                                                                                                                                                                                                                                                                                                                                                                                                                                                                                                                                                                                                                                                                                                                                                                                                                                                                                                                                                                                                                                     |   |                                                               |                                 |                                                            |              |                                                                                            |   |                                                              |                                 |                                                                                                         |              |                               |   |              |                                                                                        |   |              |                                                         |   |              |                        |   |              |                             |   |              |               |    |               |                      |    |               |            |    |               |                 |

|    |                                                                                                                               |                                                                                                                                                           |                                                                                                                                                                                                                                                                                                                                                                                                                                              |   |                                          |   |                                      |   |                                                              |   |                           |   |                           |   |                       |   |            |
|----|-------------------------------------------------------------------------------------------------------------------------------|-----------------------------------------------------------------------------------------------------------------------------------------------------------|----------------------------------------------------------------------------------------------------------------------------------------------------------------------------------------------------------------------------------------------------------------------------------------------------------------------------------------------------------------------------------------------------------------------------------------------|---|------------------------------------------|---|--------------------------------------|---|--------------------------------------------------------------|---|---------------------------|---|---------------------------|---|-----------------------|---|------------|
| 51 | ppa_qdresult<br>Afficher le champ UNIQUEM<br>ENT si :<br>[ppa_etapegen] = '3' or [ppa_etapegen] = '4' or [ppa_etapegen] = '5' | You received your genetic test result :                                                                                                                   | radio<br><table border="1"> <tr><td>1</td><td>Less than one month ago</td></tr> <tr><td>2</td><td>Between 1 and 6 months ago</td></tr> <tr><td>3</td><td>Between 7 and 11 months ago</td></tr> <tr><td>4</td><td>Between 1 and 2 years ago</td></tr> <tr><td>5</td><td>Between 3 and 5 years ago</td></tr> <tr><td>6</td><td>More than 5 years ago</td></tr> <tr><td>7</td><td>Don't know</td></tr> </table><br>Alignement personnalisé : LV | 1 | Less than one month ago                  | 2 | Between 1 and 6 months ago           | 3 | Between 7 and 11 months ago                                  | 4 | Between 1 and 2 years ago | 5 | Between 3 and 5 years ago | 6 | More than 5 years ago | 7 | Don't know |
| 1  | Less than one month ago                                                                                                       |                                                                                                                                                           |                                                                                                                                                                                                                                                                                                                                                                                                                                              |   |                                          |   |                                      |   |                                                              |   |                           |   |                           |   |                       |   |            |
| 2  | Between 1 and 6 months ago                                                                                                    |                                                                                                                                                           |                                                                                                                                                                                                                                                                                                                                                                                                                                              |   |                                          |   |                                      |   |                                                              |   |                           |   |                           |   |                       |   |            |
| 3  | Between 7 and 11 months ago                                                                                                   |                                                                                                                                                           |                                                                                                                                                                                                                                                                                                                                                                                                                                              |   |                                          |   |                                      |   |                                                              |   |                           |   |                           |   |                       |   |            |
| 4  | Between 1 and 2 years ago                                                                                                     |                                                                                                                                                           |                                                                                                                                                                                                                                                                                                                                                                                                                                              |   |                                          |   |                                      |   |                                                              |   |                           |   |                           |   |                       |   |            |
| 5  | Between 3 and 5 years ago                                                                                                     |                                                                                                                                                           |                                                                                                                                                                                                                                                                                                                                                                                                                                              |   |                                          |   |                                      |   |                                                              |   |                           |   |                           |   |                       |   |            |
| 6  | More than 5 years ago                                                                                                         |                                                                                                                                                           |                                                                                                                                                                                                                                                                                                                                                                                                                                              |   |                                          |   |                                      |   |                                                              |   |                           |   |                           |   |                       |   |            |
| 7  | Don't know                                                                                                                    |                                                                                                                                                           |                                                                                                                                                                                                                                                                                                                                                                                                                                              |   |                                          |   |                                      |   |                                                              |   |                           |   |                           |   |                       |   |            |
| 52 | ppa_qdresult5<br>Afficher le champ UNIQUEM<br>ENT si :<br>[ppa_qdresult] = '6'                                                | If more than 5 years, please indicate the number of years that have elapsed since the release of your genetic test result.                                | text<br>Alignement personnalisé : LV                                                                                                                                                                                                                                                                                                                                                                                                         |   |                                          |   |                                      |   |                                                              |   |                           |   |                           |   |                       |   |            |
| 53 | ppa_mastect<br>Afficher le champ UNIQUEM<br>ENT si :<br>[ppa_etapegen] = '4' or [ppa_etapegen] = '5'                          | Have you had or are you considering preventative mastectomy (breast removal) to reduce your risk of breast cancer?                                        | radio<br><table border="1"> <tr><td>1</td><td>Yes, I had this surgery</td></tr> <tr><td>2</td><td>Yes, I am considering this surgery</td></tr> <tr><td>3</td><td>No, I have not had this surgery and I am not considering it.</td></tr> <tr><td>4</td><td>Not applicable</td></tr> </table><br>Alignement personnalisé : LV                                                                                                                  | 1 | Yes, I had this surgery                  | 2 | Yes, I am considering this surgery   | 3 | No, I have not had this surgery and I am not considering it. | 4 | Not applicable            |   |                           |   |                       |   |            |
| 1  | Yes, I had this surgery                                                                                                       |                                                                                                                                                           |                                                                                                                                                                                                                                                                                                                                                                                                                                              |   |                                          |   |                                      |   |                                                              |   |                           |   |                           |   |                       |   |            |
| 2  | Yes, I am considering this surgery                                                                                            |                                                                                                                                                           |                                                                                                                                                                                                                                                                                                                                                                                                                                              |   |                                          |   |                                      |   |                                                              |   |                           |   |                           |   |                       |   |            |
| 3  | No, I have not had this surgery and I am not considering it.                                                                  |                                                                                                                                                           |                                                                                                                                                                                                                                                                                                                                                                                                                                              |   |                                          |   |                                      |   |                                                              |   |                           |   |                           |   |                       |   |            |
| 4  | Not applicable                                                                                                                |                                                                                                                                                           |                                                                                                                                                                                                                                                                                                                                                                                                                                              |   |                                          |   |                                      |   |                                                              |   |                           |   |                           |   |                       |   |            |
| 54 | ppa_mastectan<br>Afficher le champ UNIQUEM<br>ENT si :<br>[ppa_mastect] = '1'                                                 | In what year did you have your preventive mastectomy?                                                                                                     | text (number, Min. : 1950, Max. : 2021)<br>Alignement personnalisé : LV                                                                                                                                                                                                                                                                                                                                                                      |   |                                          |   |                                      |   |                                                              |   |                           |   |                           |   |                       |   |            |
| 55 | ppa_reconstruct<br>Afficher le champ UNIQUEM<br>ENT si :<br>[ppa_mastect] = '1'                                               | Have you had a breast reconstruction?                                                                                                                     | radio<br><table border="1"> <tr><td>1</td><td>Yes</td></tr> <tr><td>2</td><td>No</td></tr> </table><br>Alignement personnalisé : LV                                                                                                                                                                                                                                                                                                          | 1 | Yes                                      | 2 | No                                   |   |                                                              |   |                           |   |                           |   |                       |   |            |
| 1  | Yes                                                                                                                           |                                                                                                                                                           |                                                                                                                                                                                                                                                                                                                                                                                                                                              |   |                                          |   |                                      |   |                                                              |   |                           |   |                           |   |                       |   |            |
| 2  | No                                                                                                                            |                                                                                                                                                           |                                                                                                                                                                                                                                                                                                                                                                                                                                              |   |                                          |   |                                      |   |                                                              |   |                           |   |                           |   |                       |   |            |
| 56 | ppa_typereconstruct<br>Afficher le champ UNIQUEM<br>ENT si :<br>[ppa_reconstruct] = '1'                                       | What type of breast reconstruction have you had?                                                                                                          | radio<br><table border="1"> <tr><td>1</td><td>Reconstruction by adding breast implants</td></tr> <tr><td>2</td><td>Reconstruction from your own tissues</td></tr> <tr><td>3</td><td>Don't know</td></tr> </table><br>Alignement personnalisé : LV                                                                                                                                                                                            | 1 | Reconstruction by adding breast implants | 2 | Reconstruction from your own tissues | 3 | Don't know                                                   |   |                           |   |                           |   |                       |   |            |
| 1  | Reconstruction by adding breast implants                                                                                      |                                                                                                                                                           |                                                                                                                                                                                                                                                                                                                                                                                                                                              |   |                                          |   |                                      |   |                                                              |   |                           |   |                           |   |                       |   |            |
| 2  | Reconstruction from your own tissues                                                                                          |                                                                                                                                                           |                                                                                                                                                                                                                                                                                                                                                                                                                                              |   |                                          |   |                                      |   |                                                              |   |                           |   |                           |   |                       |   |            |
| 3  | Don't know                                                                                                                    |                                                                                                                                                           |                                                                                                                                                                                                                                                                                                                                                                                                                                              |   |                                          |   |                                      |   |                                                              |   |                           |   |                           |   |                       |   |            |
| 57 | ppa_ovariect<br>Afficher le champ UNIQUEM<br>ENT si :<br>[ppa_etapegen] = '4' or [ppa_etapegen] = '5'                         | Have you undergone or are you considering preventive bilateral salpingo ovariectomy (removal of ovaries and tubes) to reduce your risk of ovarian cancer? | radio<br><table border="1"> <tr><td>1</td><td>Yes, I had this surgery</td></tr> <tr><td>2</td><td>Yes, I am considering this surgery</td></tr> <tr><td>3</td><td>No, I have not had this surgery and I am not considering it.</td></tr> <tr><td>4</td><td>Not applicable</td></tr> </table><br>Alignement personnalisé : LV                                                                                                                  | 1 | Yes, I had this surgery                  | 2 | Yes, I am considering this surgery   | 3 | No, I have not had this surgery and I am not considering it. | 4 | Not applicable            |   |                           |   |                       |   |            |
| 1  | Yes, I had this surgery                                                                                                       |                                                                                                                                                           |                                                                                                                                                                                                                                                                                                                                                                                                                                              |   |                                          |   |                                      |   |                                                              |   |                           |   |                           |   |                       |   |            |
| 2  | Yes, I am considering this surgery                                                                                            |                                                                                                                                                           |                                                                                                                                                                                                                                                                                                                                                                                                                                              |   |                                          |   |                                      |   |                                                              |   |                           |   |                           |   |                       |   |            |
| 3  | No, I have not had this surgery and I am not considering it.                                                                  |                                                                                                                                                           |                                                                                                                                                                                                                                                                                                                                                                                                                                              |   |                                          |   |                                      |   |                                                              |   |                           |   |                           |   |                       |   |            |
| 4  | Not applicable                                                                                                                |                                                                                                                                                           |                                                                                                                                                                                                                                                                                                                                                                                                                                              |   |                                          |   |                                      |   |                                                              |   |                           |   |                           |   |                       |   |            |
| 58 | ppa_ovariectan<br>Afficher le champ UNIQUEM<br>ENT si :<br>[ppa_ovariect] = '1'                                               | In what year did you have a preventive bilateral salpingo ovariectomy?                                                                                    | text (number, Min. : 1950, Max. : 2021)<br>Alignement personnalisé : LV                                                                                                                                                                                                                                                                                                                                                                      |   |                                          |   |                                      |   |                                                              |   |                           |   |                           |   |                       |   |            |

|    |                                                                               |                                                                                                           |                                                                                                                                                                                                                                                                                                                                                                                                                                                                                                                                                                                     |   |             |                                               |            |             |                                              |   |             |                                         |   |             |                         |   |             |                   |   |             |       |
|----|-------------------------------------------------------------------------------|-----------------------------------------------------------------------------------------------------------|-------------------------------------------------------------------------------------------------------------------------------------------------------------------------------------------------------------------------------------------------------------------------------------------------------------------------------------------------------------------------------------------------------------------------------------------------------------------------------------------------------------------------------------------------------------------------------------|---|-------------|-----------------------------------------------|------------|-------------|----------------------------------------------|---|-------------|-----------------------------------------|---|-------------|-------------------------|---|-------------|-------------------|---|-------------|-------|
| 59 | ppa_info                                                                      | During your meetings with the health care team, the information provided allowed you to fully understand: | checkbox <table border="1"> <tr> <td>1</td> <td>ppa_info__1</td> <td>Your condition (stakes, diagnosis, evolution)</td> </tr> <tr> <td>2</td> <td>ppa_info__2</td> <td>Your examinations (tests and investigations)</td> </tr> <tr> <td>3</td> <td>ppa_info__3</td> <td>Your options, benefits and side effects</td> </tr> <tr> <td>4</td> <td>ppa_info__4</td> <td>Your follow-up and care</td> </tr> <tr> <td>5</td> <td>ppa_info__5</td> <td>None of the above</td> </tr> <tr> <td>6</td> <td>ppa_info__6</td> <td>Other</td> </tr> </table> <p>Alignement personnalisé : LV</p> | 1 | ppa_info__1 | Your condition (stakes, diagnosis, evolution) | 2          | ppa_info__2 | Your examinations (tests and investigations) | 3 | ppa_info__3 | Your options, benefits and side effects | 4 | ppa_info__4 | Your follow-up and care | 5 | ppa_info__5 | None of the above | 6 | ppa_info__6 | Other |
| 1  | ppa_info__1                                                                   | Your condition (stakes, diagnosis, evolution)                                                             |                                                                                                                                                                                                                                                                                                                                                                                                                                                                                                                                                                                     |   |             |                                               |            |             |                                              |   |             |                                         |   |             |                         |   |             |                   |   |             |       |
| 2  | ppa_info__2                                                                   | Your examinations (tests and investigations)                                                              |                                                                                                                                                                                                                                                                                                                                                                                                                                                                                                                                                                                     |   |             |                                               |            |             |                                              |   |             |                                         |   |             |                         |   |             |                   |   |             |       |
| 3  | ppa_info__3                                                                   | Your options, benefits and side effects                                                                   |                                                                                                                                                                                                                                                                                                                                                                                                                                                                                                                                                                                     |   |             |                                               |            |             |                                              |   |             |                                         |   |             |                         |   |             |                   |   |             |       |
| 4  | ppa_info__4                                                                   | Your follow-up and care                                                                                   |                                                                                                                                                                                                                                                                                                                                                                                                                                                                                                                                                                                     |   |             |                                               |            |             |                                              |   |             |                                         |   |             |                         |   |             |                   |   |             |       |
| 5  | ppa_info__5                                                                   | None of the above                                                                                         |                                                                                                                                                                                                                                                                                                                                                                                                                                                                                                                                                                                     |   |             |                                               |            |             |                                              |   |             |                                         |   |             |                         |   |             |                   |   |             |       |
| 6  | ppa_info__6                                                                   | Other                                                                                                     |                                                                                                                                                                                                                                                                                                                                                                                                                                                                                                                                                                                     |   |             |                                               |            |             |                                              |   |             |                                         |   |             |                         |   |             |                   |   |             |       |
| 60 | ppa_infoautre<br>Afficher le champ UNIQUEM<br>ENT si :<br>[ppa_info(6)] = '1' | If you answered "Other", please specify :                                                                 | text<br>Alignement personnalisé : LV                                                                                                                                                                                                                                                                                                                                                                                                                                                                                                                                                |   |             |                                               |            |             |                                              |   |             |                                         |   |             |                         |   |             |                   |   |             |       |
| 61 | pas_care_experience_questio<br>naire_complete                                 | En-tête de section : <i>Form Status</i><br>Complete?                                                      | dropdown <table border="1"> <tr> <td>0</td> <td>Incomplete</td> </tr> <tr> <td>1</td> <td>Unverified</td> </tr> <tr> <td>2</td> <td>Complete</td> </tr> </table>                                                                                                                                                                                                                                                                                                                                                                                                                    | 0 | Incomplete  | 1                                             | Unverified | 2           | Complete                                     |   |             |                                         |   |             |                         |   |             |                   |   |             |       |
| 0  | Incomplete                                                                    |                                                                                                           |                                                                                                                                                                                                                                                                                                                                                                                                                                                                                                                                                                                     |   |             |                                               |            |             |                                              |   |             |                                         |   |             |                         |   |             |                   |   |             |       |
| 1  | Unverified                                                                    |                                                                                                           |                                                                                                                                                                                                                                                                                                                                                                                                                                                                                                                                                                                     |   |             |                                               |            |             |                                              |   |             |                                         |   |             |                         |   |             |                   |   |             |       |
| 2  | Complete                                                                      |                                                                                                           |                                                                                                                                                                                                                                                                                                                                                                                                                                                                                                                                                                                     |   |             |                                               |            |             |                                              |   |             |                                         |   |             |                         |   |             |                   |   |             |       |

Formulaire : **Previous personal experience with PAs questionnaire** (previous\_personal\_experience\_with\_pas\_questionnaire) [^ Collapse](#)

|    |                                                                                           |                                                                                                                                                           |                                                                                                                                                                                                                                                                                                                                                                                                                                                                                                                                                                                                                                                                                                                                                                                                                                                                                                                                                                                                      |   |                   |                                 |                                              |                   |                                                 |   |                   |                                                 |   |                   |                     |   |                   |                                                                  |   |                   |                                              |   |                   |                                                              |   |                   |                                  |   |                   |                   |
|----|-------------------------------------------------------------------------------------------|-----------------------------------------------------------------------------------------------------------------------------------------------------------|------------------------------------------------------------------------------------------------------------------------------------------------------------------------------------------------------------------------------------------------------------------------------------------------------------------------------------------------------------------------------------------------------------------------------------------------------------------------------------------------------------------------------------------------------------------------------------------------------------------------------------------------------------------------------------------------------------------------------------------------------------------------------------------------------------------------------------------------------------------------------------------------------------------------------------------------------------------------------------------------------|---|-------------------|---------------------------------|----------------------------------------------|-------------------|-------------------------------------------------|---|-------------------|-------------------------------------------------|---|-------------------|---------------------|---|-------------------|------------------------------------------------------------------|---|-------------------|----------------------------------------------|---|-------------------|--------------------------------------------------------------|---|-------------------|----------------------------------|---|-------------------|-------------------|
| 62 | pa_jumelage_v2                                                                            | En-tête de section : <i>CONTACT WITH A PATIENT ADVISOR DURING YOUR OWN CARE PATHWAY</i><br>Have you ever been in contact with a patient advisor yourself? | radio <table border="1"> <tr> <td>0</td> <td>Yes</td> </tr> <tr> <td>1</td> <td>No and I would have liked to benefit from it</td> </tr> <tr> <td>2</td> <td>No, and I don't think I needed it.</td> </tr> </table> <p>Alignement personnalisé : LV</p>                                                                                                                                                                                                                                                                                                                                                                                                                                                                                                                                                                                                                                                                                                                                               | 0 | Yes               | 1                               | No and I would have liked to benefit from it | 2                 | No, and I don't think I needed it.              |   |                   |                                                 |   |                   |                     |   |                   |                                                                  |   |                   |                                              |   |                   |                                                              |   |                   |                                  |   |                   |                   |
| 0  | Yes                                                                                       |                                                                                                                                                           |                                                                                                                                                                                                                                                                                                                                                                                                                                                                                                                                                                                                                                                                                                                                                                                                                                                                                                                                                                                                      |   |                   |                                 |                                              |                   |                                                 |   |                   |                                                 |   |                   |                     |   |                   |                                                                  |   |                   |                                              |   |                   |                                                              |   |                   |                                  |   |                   |                   |
| 1  | No and I would have liked to benefit from it                                              |                                                                                                                                                           |                                                                                                                                                                                                                                                                                                                                                                                                                                                                                                                                                                                                                                                                                                                                                                                                                                                                                                                                                                                                      |   |                   |                                 |                                              |                   |                                                 |   |                   |                                                 |   |                   |                     |   |                   |                                                                  |   |                   |                                              |   |                   |                                                              |   |                   |                                  |   |                   |                   |
| 2  | No, and I don't think I needed it.                                                        |                                                                                                                                                           |                                                                                                                                                                                                                                                                                                                                                                                                                                                                                                                                                                                                                                                                                                                                                                                                                                                                                                                                                                                                      |   |                   |                                 |                                              |                   |                                                 |   |                   |                                                 |   |                   |                     |   |                   |                                                                  |   |                   |                                              |   |                   |                                                              |   |                   |                                  |   |                   |                   |
| 63 | pa_bidon2_v2_v2_v2<br>Afficher le champ UNIQUEM<br>ENT si :<br>[pa_jumelage_v2] = '0'     | What topics did you discuss with the patient advisor?<br>(Check all that apply)                                                                           | descriptive                                                                                                                                                                                                                                                                                                                                                                                                                                                                                                                                                                                                                                                                                                                                                                                                                                                                                                                                                                                          |   |                   |                                 |                                              |                   |                                                 |   |                   |                                                 |   |                   |                     |   |                   |                                                                  |   |                   |                                              |   |                   |                                                              |   |                   |                                  |   |                   |                   |
| 64 | pa_themeorg_v2<br>Afficher le champ UNIQUEM<br>ENT si :<br>[pa_jumelage_v2] = '0'         | Organizational aspects                                                                                                                                    | checkbox <table border="1"> <tr> <td>0</td> <td>pa_themeorg_v2__0</td> <td>Her/His role as patient advisor</td> </tr> <tr> <td>1</td> <td>pa_themeorg_v2__1</td> <td>The role of different health care professionals</td> </tr> <tr> <td>2</td> <td>pa_themeorg_v2__2</td> <td>The role of external and internal organizations</td> </tr> <tr> <td>3</td> <td>pa_themeorg_v2__3</td> <td>The care trajectory</td> </tr> <tr> <td>4</td> <td>pa_themeorg_v2__4</td> <td>Rights as a patient (e.g., refusing treatment, asking questions)</td> </tr> <tr> <td>5</td> <td>pa_themeorg_v2__5</td> <td>Where and how to get to medical appointments</td> </tr> <tr> <td>6</td> <td>pa_themeorg_v2__6</td> <td>Financial support for patients and transportation assistance</td> </tr> <tr> <td>7</td> <td>pa_themeorg_v2__7</td> <td>The Parole-Onco Research Project</td> </tr> <tr> <td>8</td> <td>pa_themeorg_v2__8</td> <td>Other information</td> </tr> </table> <p>Alignement personnalisé : LV</p> | 0 | pa_themeorg_v2__0 | Her/His role as patient advisor | 1                                            | pa_themeorg_v2__1 | The role of different health care professionals | 2 | pa_themeorg_v2__2 | The role of external and internal organizations | 3 | pa_themeorg_v2__3 | The care trajectory | 4 | pa_themeorg_v2__4 | Rights as a patient (e.g., refusing treatment, asking questions) | 5 | pa_themeorg_v2__5 | Where and how to get to medical appointments | 6 | pa_themeorg_v2__6 | Financial support for patients and transportation assistance | 7 | pa_themeorg_v2__7 | The Parole-Onco Research Project | 8 | pa_themeorg_v2__8 | Other information |
| 0  | pa_themeorg_v2__0                                                                         | Her/His role as patient advisor                                                                                                                           |                                                                                                                                                                                                                                                                                                                                                                                                                                                                                                                                                                                                                                                                                                                                                                                                                                                                                                                                                                                                      |   |                   |                                 |                                              |                   |                                                 |   |                   |                                                 |   |                   |                     |   |                   |                                                                  |   |                   |                                              |   |                   |                                                              |   |                   |                                  |   |                   |                   |
| 1  | pa_themeorg_v2__1                                                                         | The role of different health care professionals                                                                                                           |                                                                                                                                                                                                                                                                                                                                                                                                                                                                                                                                                                                                                                                                                                                                                                                                                                                                                                                                                                                                      |   |                   |                                 |                                              |                   |                                                 |   |                   |                                                 |   |                   |                     |   |                   |                                                                  |   |                   |                                              |   |                   |                                                              |   |                   |                                  |   |                   |                   |
| 2  | pa_themeorg_v2__2                                                                         | The role of external and internal organizations                                                                                                           |                                                                                                                                                                                                                                                                                                                                                                                                                                                                                                                                                                                                                                                                                                                                                                                                                                                                                                                                                                                                      |   |                   |                                 |                                              |                   |                                                 |   |                   |                                                 |   |                   |                     |   |                   |                                                                  |   |                   |                                              |   |                   |                                                              |   |                   |                                  |   |                   |                   |
| 3  | pa_themeorg_v2__3                                                                         | The care trajectory                                                                                                                                       |                                                                                                                                                                                                                                                                                                                                                                                                                                                                                                                                                                                                                                                                                                                                                                                                                                                                                                                                                                                                      |   |                   |                                 |                                              |                   |                                                 |   |                   |                                                 |   |                   |                     |   |                   |                                                                  |   |                   |                                              |   |                   |                                                              |   |                   |                                  |   |                   |                   |
| 4  | pa_themeorg_v2__4                                                                         | Rights as a patient (e.g., refusing treatment, asking questions)                                                                                          |                                                                                                                                                                                                                                                                                                                                                                                                                                                                                                                                                                                                                                                                                                                                                                                                                                                                                                                                                                                                      |   |                   |                                 |                                              |                   |                                                 |   |                   |                                                 |   |                   |                     |   |                   |                                                                  |   |                   |                                              |   |                   |                                                              |   |                   |                                  |   |                   |                   |
| 5  | pa_themeorg_v2__5                                                                         | Where and how to get to medical appointments                                                                                                              |                                                                                                                                                                                                                                                                                                                                                                                                                                                                                                                                                                                                                                                                                                                                                                                                                                                                                                                                                                                                      |   |                   |                                 |                                              |                   |                                                 |   |                   |                                                 |   |                   |                     |   |                   |                                                                  |   |                   |                                              |   |                   |                                                              |   |                   |                                  |   |                   |                   |
| 6  | pa_themeorg_v2__6                                                                         | Financial support for patients and transportation assistance                                                                                              |                                                                                                                                                                                                                                                                                                                                                                                                                                                                                                                                                                                                                                                                                                                                                                                                                                                                                                                                                                                                      |   |                   |                                 |                                              |                   |                                                 |   |                   |                                                 |   |                   |                     |   |                   |                                                                  |   |                   |                                              |   |                   |                                                              |   |                   |                                  |   |                   |                   |
| 7  | pa_themeorg_v2__7                                                                         | The Parole-Onco Research Project                                                                                                                          |                                                                                                                                                                                                                                                                                                                                                                                                                                                                                                                                                                                                                                                                                                                                                                                                                                                                                                                                                                                                      |   |                   |                                 |                                              |                   |                                                 |   |                   |                                                 |   |                   |                     |   |                   |                                                                  |   |                   |                                              |   |                   |                                                              |   |                   |                                  |   |                   |                   |
| 8  | pa_themeorg_v2__8                                                                         | Other information                                                                                                                                         |                                                                                                                                                                                                                                                                                                                                                                                                                                                                                                                                                                                                                                                                                                                                                                                                                                                                                                                                                                                                      |   |                   |                                 |                                              |                   |                                                 |   |                   |                                                 |   |                   |                     |   |                   |                                                                  |   |                   |                                              |   |                   |                                                              |   |                   |                                  |   |                   |                   |
| 65 | pa_themeorgautre_v2<br>Afficher le champ UNIQUEM<br>ENT si :<br>[pa_themeorg_v2(8)] = '1' | If other information, please specify which one:                                                                                                           | text<br>Alignement personnalisé : LV                                                                                                                                                                                                                                                                                                                                                                                                                                                                                                                                                                                                                                                                                                                                                                                                                                                                                                                                                                 |   |                   |                                 |                                              |                   |                                                 |   |                   |                                                 |   |                   |                     |   |                   |                                                                  |   |                   |                                              |   |                   |                                                              |   |                   |                                  |   |                   |                   |

|    |                                                                                            |                                                                                      |                                                                                                                                                                                                                                                                                                                                                                                                                                                                                                                                                                                                                                                                                                                                                                                                                                                                                                                                                                                                                                                                                                                                                                                                                                                                                                                                                                                                                                                                                                                                                                                                                                                                                                                                                                                                            |   |                   |                                                                                  |   |                   |        |   |                   |                 |   |                   |                                           |   |                   |                                                                                      |   |                   |                                                |   |                   |                 |   |                   |                 |   |                   |                     |   |                   |                                         |    |                    |                              |    |                    |                                     |    |                    |                                   |    |                    |                   |    |                    |                               |    |                    |                                               |    |                    |                           |    |                    |                   |
|----|--------------------------------------------------------------------------------------------|--------------------------------------------------------------------------------------|------------------------------------------------------------------------------------------------------------------------------------------------------------------------------------------------------------------------------------------------------------------------------------------------------------------------------------------------------------------------------------------------------------------------------------------------------------------------------------------------------------------------------------------------------------------------------------------------------------------------------------------------------------------------------------------------------------------------------------------------------------------------------------------------------------------------------------------------------------------------------------------------------------------------------------------------------------------------------------------------------------------------------------------------------------------------------------------------------------------------------------------------------------------------------------------------------------------------------------------------------------------------------------------------------------------------------------------------------------------------------------------------------------------------------------------------------------------------------------------------------------------------------------------------------------------------------------------------------------------------------------------------------------------------------------------------------------------------------------------------------------------------------------------------------------|---|-------------------|----------------------------------------------------------------------------------|---|-------------------|--------|---|-------------------|-----------------|---|-------------------|-------------------------------------------|---|-------------------|--------------------------------------------------------------------------------------|---|-------------------|------------------------------------------------|---|-------------------|-----------------|---|-------------------|-----------------|---|-------------------|---------------------|---|-------------------|-----------------------------------------|----|--------------------|------------------------------|----|--------------------|-------------------------------------|----|--------------------|-----------------------------------|----|--------------------|-------------------|----|--------------------|-------------------------------|----|--------------------|-----------------------------------------------|----|--------------------|---------------------------|----|--------------------|-------------------|
| 66 | pa_themecli_v2<br>Afficher le champ UNIQUEM<br>ENT si :<br>[pa_jumelage_v2] = '0'          | Clinical aspects                                                                     | checkbox<br><table border="1"> <tr> <td>0</td> <td>pa_themecli_v2__0</td> <td>The announcement of the cancer diagnosis or genetic predisposition by the doctor</td> </tr> <tr> <td>1</td> <td>pa_themecli_v2__1</td> <td>Cancer</td> </tr> <tr> <td>2</td> <td>pa_themecli_v2__2</td> <td>Genetic testing</td> </tr> <tr> <td>3</td> <td>pa_themecli_v2__3</td> <td>Therapeutic options in the case of cancer</td> </tr> <tr> <td>4</td> <td>pa_themecli_v2__4</td> <td>Ways to reduce risk in carriers of a gene mutation that increases the risk of cancer</td> </tr> <tr> <td>5</td> <td>pa_themecli_v2__5</td> <td>Surgical and reconstructive options for cancer</td> </tr> <tr> <td>6</td> <td>pa_themecli_v2__6</td> <td>Breast implants</td> </tr> <tr> <td>7</td> <td>pa_themecli_v2__7</td> <td>Hormonal issues</td> </tr> <tr> <td>8</td> <td>pa_themecli_v2__8</td> <td>Reproductive issues</td> </tr> <tr> <td>9</td> <td>pa_themecli_v2__9</td> <td>Urinary and erectile dysfunction issues</td> </tr> <tr> <td>10</td> <td>pa_themecli_v2__10</td> <td>Fatigue following treatments</td> </tr> <tr> <td>11</td> <td>pa_themecli_v2__11</td> <td>Pain and discomfort after treatment</td> </tr> <tr> <td>12</td> <td>pa_themecli_v2__12</td> <td>Pain and discomfort after surgery</td> </tr> <tr> <td>13</td> <td>pa_themecli_v2__13</td> <td>Possible emotions</td> </tr> <tr> <td>14</td> <td>pa_themecli_v2__14</td> <td>Stress and anxiety management</td> </tr> <tr> <td>15</td> <td>pa_themecli_v2__15</td> <td>Impact on physical appearance and self-esteem</td> </tr> <tr> <td>16</td> <td>pa_themecli_v2__16</td> <td>Decision-making processes</td> </tr> <tr> <td>17</td> <td>pa_themecli_v2__17</td> <td>Other information</td> </tr> </table><br>Alignement personnalisé : LV | 0 | pa_themecli_v2__0 | The announcement of the cancer diagnosis or genetic predisposition by the doctor | 1 | pa_themecli_v2__1 | Cancer | 2 | pa_themecli_v2__2 | Genetic testing | 3 | pa_themecli_v2__3 | Therapeutic options in the case of cancer | 4 | pa_themecli_v2__4 | Ways to reduce risk in carriers of a gene mutation that increases the risk of cancer | 5 | pa_themecli_v2__5 | Surgical and reconstructive options for cancer | 6 | pa_themecli_v2__6 | Breast implants | 7 | pa_themecli_v2__7 | Hormonal issues | 8 | pa_themecli_v2__8 | Reproductive issues | 9 | pa_themecli_v2__9 | Urinary and erectile dysfunction issues | 10 | pa_themecli_v2__10 | Fatigue following treatments | 11 | pa_themecli_v2__11 | Pain and discomfort after treatment | 12 | pa_themecli_v2__12 | Pain and discomfort after surgery | 13 | pa_themecli_v2__13 | Possible emotions | 14 | pa_themecli_v2__14 | Stress and anxiety management | 15 | pa_themecli_v2__15 | Impact on physical appearance and self-esteem | 16 | pa_themecli_v2__16 | Decision-making processes | 17 | pa_themecli_v2__17 | Other information |
| 0  | pa_themecli_v2__0                                                                          | The announcement of the cancer diagnosis or genetic predisposition by the doctor     |                                                                                                                                                                                                                                                                                                                                                                                                                                                                                                                                                                                                                                                                                                                                                                                                                                                                                                                                                                                                                                                                                                                                                                                                                                                                                                                                                                                                                                                                                                                                                                                                                                                                                                                                                                                                            |   |                   |                                                                                  |   |                   |        |   |                   |                 |   |                   |                                           |   |                   |                                                                                      |   |                   |                                                |   |                   |                 |   |                   |                 |   |                   |                     |   |                   |                                         |    |                    |                              |    |                    |                                     |    |                    |                                   |    |                    |                   |    |                    |                               |    |                    |                                               |    |                    |                           |    |                    |                   |
| 1  | pa_themecli_v2__1                                                                          | Cancer                                                                               |                                                                                                                                                                                                                                                                                                                                                                                                                                                                                                                                                                                                                                                                                                                                                                                                                                                                                                                                                                                                                                                                                                                                                                                                                                                                                                                                                                                                                                                                                                                                                                                                                                                                                                                                                                                                            |   |                   |                                                                                  |   |                   |        |   |                   |                 |   |                   |                                           |   |                   |                                                                                      |   |                   |                                                |   |                   |                 |   |                   |                 |   |                   |                     |   |                   |                                         |    |                    |                              |    |                    |                                     |    |                    |                                   |    |                    |                   |    |                    |                               |    |                    |                                               |    |                    |                           |    |                    |                   |
| 2  | pa_themecli_v2__2                                                                          | Genetic testing                                                                      |                                                                                                                                                                                                                                                                                                                                                                                                                                                                                                                                                                                                                                                                                                                                                                                                                                                                                                                                                                                                                                                                                                                                                                                                                                                                                                                                                                                                                                                                                                                                                                                                                                                                                                                                                                                                            |   |                   |                                                                                  |   |                   |        |   |                   |                 |   |                   |                                           |   |                   |                                                                                      |   |                   |                                                |   |                   |                 |   |                   |                 |   |                   |                     |   |                   |                                         |    |                    |                              |    |                    |                                     |    |                    |                                   |    |                    |                   |    |                    |                               |    |                    |                                               |    |                    |                           |    |                    |                   |
| 3  | pa_themecli_v2__3                                                                          | Therapeutic options in the case of cancer                                            |                                                                                                                                                                                                                                                                                                                                                                                                                                                                                                                                                                                                                                                                                                                                                                                                                                                                                                                                                                                                                                                                                                                                                                                                                                                                                                                                                                                                                                                                                                                                                                                                                                                                                                                                                                                                            |   |                   |                                                                                  |   |                   |        |   |                   |                 |   |                   |                                           |   |                   |                                                                                      |   |                   |                                                |   |                   |                 |   |                   |                 |   |                   |                     |   |                   |                                         |    |                    |                              |    |                    |                                     |    |                    |                                   |    |                    |                   |    |                    |                               |    |                    |                                               |    |                    |                           |    |                    |                   |
| 4  | pa_themecli_v2__4                                                                          | Ways to reduce risk in carriers of a gene mutation that increases the risk of cancer |                                                                                                                                                                                                                                                                                                                                                                                                                                                                                                                                                                                                                                                                                                                                                                                                                                                                                                                                                                                                                                                                                                                                                                                                                                                                                                                                                                                                                                                                                                                                                                                                                                                                                                                                                                                                            |   |                   |                                                                                  |   |                   |        |   |                   |                 |   |                   |                                           |   |                   |                                                                                      |   |                   |                                                |   |                   |                 |   |                   |                 |   |                   |                     |   |                   |                                         |    |                    |                              |    |                    |                                     |    |                    |                                   |    |                    |                   |    |                    |                               |    |                    |                                               |    |                    |                           |    |                    |                   |
| 5  | pa_themecli_v2__5                                                                          | Surgical and reconstructive options for cancer                                       |                                                                                                                                                                                                                                                                                                                                                                                                                                                                                                                                                                                                                                                                                                                                                                                                                                                                                                                                                                                                                                                                                                                                                                                                                                                                                                                                                                                                                                                                                                                                                                                                                                                                                                                                                                                                            |   |                   |                                                                                  |   |                   |        |   |                   |                 |   |                   |                                           |   |                   |                                                                                      |   |                   |                                                |   |                   |                 |   |                   |                 |   |                   |                     |   |                   |                                         |    |                    |                              |    |                    |                                     |    |                    |                                   |    |                    |                   |    |                    |                               |    |                    |                                               |    |                    |                           |    |                    |                   |
| 6  | pa_themecli_v2__6                                                                          | Breast implants                                                                      |                                                                                                                                                                                                                                                                                                                                                                                                                                                                                                                                                                                                                                                                                                                                                                                                                                                                                                                                                                                                                                                                                                                                                                                                                                                                                                                                                                                                                                                                                                                                                                                                                                                                                                                                                                                                            |   |                   |                                                                                  |   |                   |        |   |                   |                 |   |                   |                                           |   |                   |                                                                                      |   |                   |                                                |   |                   |                 |   |                   |                 |   |                   |                     |   |                   |                                         |    |                    |                              |    |                    |                                     |    |                    |                                   |    |                    |                   |    |                    |                               |    |                    |                                               |    |                    |                           |    |                    |                   |
| 7  | pa_themecli_v2__7                                                                          | Hormonal issues                                                                      |                                                                                                                                                                                                                                                                                                                                                                                                                                                                                                                                                                                                                                                                                                                                                                                                                                                                                                                                                                                                                                                                                                                                                                                                                                                                                                                                                                                                                                                                                                                                                                                                                                                                                                                                                                                                            |   |                   |                                                                                  |   |                   |        |   |                   |                 |   |                   |                                           |   |                   |                                                                                      |   |                   |                                                |   |                   |                 |   |                   |                 |   |                   |                     |   |                   |                                         |    |                    |                              |    |                    |                                     |    |                    |                                   |    |                    |                   |    |                    |                               |    |                    |                                               |    |                    |                           |    |                    |                   |
| 8  | pa_themecli_v2__8                                                                          | Reproductive issues                                                                  |                                                                                                                                                                                                                                                                                                                                                                                                                                                                                                                                                                                                                                                                                                                                                                                                                                                                                                                                                                                                                                                                                                                                                                                                                                                                                                                                                                                                                                                                                                                                                                                                                                                                                                                                                                                                            |   |                   |                                                                                  |   |                   |        |   |                   |                 |   |                   |                                           |   |                   |                                                                                      |   |                   |                                                |   |                   |                 |   |                   |                 |   |                   |                     |   |                   |                                         |    |                    |                              |    |                    |                                     |    |                    |                                   |    |                    |                   |    |                    |                               |    |                    |                                               |    |                    |                           |    |                    |                   |
| 9  | pa_themecli_v2__9                                                                          | Urinary and erectile dysfunction issues                                              |                                                                                                                                                                                                                                                                                                                                                                                                                                                                                                                                                                                                                                                                                                                                                                                                                                                                                                                                                                                                                                                                                                                                                                                                                                                                                                                                                                                                                                                                                                                                                                                                                                                                                                                                                                                                            |   |                   |                                                                                  |   |                   |        |   |                   |                 |   |                   |                                           |   |                   |                                                                                      |   |                   |                                                |   |                   |                 |   |                   |                 |   |                   |                     |   |                   |                                         |    |                    |                              |    |                    |                                     |    |                    |                                   |    |                    |                   |    |                    |                               |    |                    |                                               |    |                    |                           |    |                    |                   |
| 10 | pa_themecli_v2__10                                                                         | Fatigue following treatments                                                         |                                                                                                                                                                                                                                                                                                                                                                                                                                                                                                                                                                                                                                                                                                                                                                                                                                                                                                                                                                                                                                                                                                                                                                                                                                                                                                                                                                                                                                                                                                                                                                                                                                                                                                                                                                                                            |   |                   |                                                                                  |   |                   |        |   |                   |                 |   |                   |                                           |   |                   |                                                                                      |   |                   |                                                |   |                   |                 |   |                   |                 |   |                   |                     |   |                   |                                         |    |                    |                              |    |                    |                                     |    |                    |                                   |    |                    |                   |    |                    |                               |    |                    |                                               |    |                    |                           |    |                    |                   |
| 11 | pa_themecli_v2__11                                                                         | Pain and discomfort after treatment                                                  |                                                                                                                                                                                                                                                                                                                                                                                                                                                                                                                                                                                                                                                                                                                                                                                                                                                                                                                                                                                                                                                                                                                                                                                                                                                                                                                                                                                                                                                                                                                                                                                                                                                                                                                                                                                                            |   |                   |                                                                                  |   |                   |        |   |                   |                 |   |                   |                                           |   |                   |                                                                                      |   |                   |                                                |   |                   |                 |   |                   |                 |   |                   |                     |   |                   |                                         |    |                    |                              |    |                    |                                     |    |                    |                                   |    |                    |                   |    |                    |                               |    |                    |                                               |    |                    |                           |    |                    |                   |
| 12 | pa_themecli_v2__12                                                                         | Pain and discomfort after surgery                                                    |                                                                                                                                                                                                                                                                                                                                                                                                                                                                                                                                                                                                                                                                                                                                                                                                                                                                                                                                                                                                                                                                                                                                                                                                                                                                                                                                                                                                                                                                                                                                                                                                                                                                                                                                                                                                            |   |                   |                                                                                  |   |                   |        |   |                   |                 |   |                   |                                           |   |                   |                                                                                      |   |                   |                                                |   |                   |                 |   |                   |                 |   |                   |                     |   |                   |                                         |    |                    |                              |    |                    |                                     |    |                    |                                   |    |                    |                   |    |                    |                               |    |                    |                                               |    |                    |                           |    |                    |                   |
| 13 | pa_themecli_v2__13                                                                         | Possible emotions                                                                    |                                                                                                                                                                                                                                                                                                                                                                                                                                                                                                                                                                                                                                                                                                                                                                                                                                                                                                                                                                                                                                                                                                                                                                                                                                                                                                                                                                                                                                                                                                                                                                                                                                                                                                                                                                                                            |   |                   |                                                                                  |   |                   |        |   |                   |                 |   |                   |                                           |   |                   |                                                                                      |   |                   |                                                |   |                   |                 |   |                   |                 |   |                   |                     |   |                   |                                         |    |                    |                              |    |                    |                                     |    |                    |                                   |    |                    |                   |    |                    |                               |    |                    |                                               |    |                    |                           |    |                    |                   |
| 14 | pa_themecli_v2__14                                                                         | Stress and anxiety management                                                        |                                                                                                                                                                                                                                                                                                                                                                                                                                                                                                                                                                                                                                                                                                                                                                                                                                                                                                                                                                                                                                                                                                                                                                                                                                                                                                                                                                                                                                                                                                                                                                                                                                                                                                                                                                                                            |   |                   |                                                                                  |   |                   |        |   |                   |                 |   |                   |                                           |   |                   |                                                                                      |   |                   |                                                |   |                   |                 |   |                   |                 |   |                   |                     |   |                   |                                         |    |                    |                              |    |                    |                                     |    |                    |                                   |    |                    |                   |    |                    |                               |    |                    |                                               |    |                    |                           |    |                    |                   |
| 15 | pa_themecli_v2__15                                                                         | Impact on physical appearance and self-esteem                                        |                                                                                                                                                                                                                                                                                                                                                                                                                                                                                                                                                                                                                                                                                                                                                                                                                                                                                                                                                                                                                                                                                                                                                                                                                                                                                                                                                                                                                                                                                                                                                                                                                                                                                                                                                                                                            |   |                   |                                                                                  |   |                   |        |   |                   |                 |   |                   |                                           |   |                   |                                                                                      |   |                   |                                                |   |                   |                 |   |                   |                 |   |                   |                     |   |                   |                                         |    |                    |                              |    |                    |                                     |    |                    |                                   |    |                    |                   |    |                    |                               |    |                    |                                               |    |                    |                           |    |                    |                   |
| 16 | pa_themecli_v2__16                                                                         | Decision-making processes                                                            |                                                                                                                                                                                                                                                                                                                                                                                                                                                                                                                                                                                                                                                                                                                                                                                                                                                                                                                                                                                                                                                                                                                                                                                                                                                                                                                                                                                                                                                                                                                                                                                                                                                                                                                                                                                                            |   |                   |                                                                                  |   |                   |        |   |                   |                 |   |                   |                                           |   |                   |                                                                                      |   |                   |                                                |   |                   |                 |   |                   |                 |   |                   |                     |   |                   |                                         |    |                    |                              |    |                    |                                     |    |                    |                                   |    |                    |                   |    |                    |                               |    |                    |                                               |    |                    |                           |    |                    |                   |
| 17 | pa_themecli_v2__17                                                                         | Other information                                                                    |                                                                                                                                                                                                                                                                                                                                                                                                                                                                                                                                                                                                                                                                                                                                                                                                                                                                                                                                                                                                                                                                                                                                                                                                                                                                                                                                                                                                                                                                                                                                                                                                                                                                                                                                                                                                            |   |                   |                                                                                  |   |                   |        |   |                   |                 |   |                   |                                           |   |                   |                                                                                      |   |                   |                                                |   |                   |                 |   |                   |                 |   |                   |                     |   |                   |                                         |    |                    |                              |    |                    |                                     |    |                    |                                   |    |                    |                   |    |                    |                               |    |                    |                                               |    |                    |                           |    |                    |                   |
| 67 | pa_themecliautre_v2<br>Afficher le champ UNIQUEM<br>ENT si :<br>[pa_themecli_v2(17)] = '1' | If other information, please specify which one:                                      | text<br>Alignement personnalisé : LV                                                                                                                                                                                                                                                                                                                                                                                                                                                                                                                                                                                                                                                                                                                                                                                                                                                                                                                                                                                                                                                                                                                                                                                                                                                                                                                                                                                                                                                                                                                                                                                                                                                                                                                                                                       |   |                   |                                                                                  |   |                   |        |   |                   |                 |   |                   |                                           |   |                   |                                                                                      |   |                   |                                                |   |                   |                 |   |                   |                 |   |                   |                     |   |                   |                                         |    |                    |                              |    |                    |                                     |    |                    |                                   |    |                    |                   |    |                    |                               |    |                    |                                               |    |                    |                           |    |                    |                   |

|    |                                                                                            |                                                                                                                                         |                                                                                                                                                                                                                                                                                                                                                                                                                                                                                                                                                                                                                                                                                                                                                                                                                                                                                                                                                                                                                                                                                                                                                                                                                                                                                                                                                                                                                               |   |                   |                                                                                                        |   |                   |                                                                   |   |                   |                                                                                                                                         |   |                   |                                                                               |   |                   |                                                             |   |                   |                                                                |   |                   |                                                |   |                   |                        |   |                   |                           |   |                   |                                   |    |                    |                                            |    |                    |                                                             |    |                    |                                        |    |                    |                   |
|----|--------------------------------------------------------------------------------------------|-----------------------------------------------------------------------------------------------------------------------------------------|-------------------------------------------------------------------------------------------------------------------------------------------------------------------------------------------------------------------------------------------------------------------------------------------------------------------------------------------------------------------------------------------------------------------------------------------------------------------------------------------------------------------------------------------------------------------------------------------------------------------------------------------------------------------------------------------------------------------------------------------------------------------------------------------------------------------------------------------------------------------------------------------------------------------------------------------------------------------------------------------------------------------------------------------------------------------------------------------------------------------------------------------------------------------------------------------------------------------------------------------------------------------------------------------------------------------------------------------------------------------------------------------------------------------------------|---|-------------------|--------------------------------------------------------------------------------------------------------|---|-------------------|-------------------------------------------------------------------|---|-------------------|-----------------------------------------------------------------------------------------------------------------------------------------|---|-------------------|-------------------------------------------------------------------------------|---|-------------------|-------------------------------------------------------------|---|-------------------|----------------------------------------------------------------|---|-------------------|------------------------------------------------|---|-------------------|------------------------|---|-------------------|---------------------------|---|-------------------|-----------------------------------|----|--------------------|--------------------------------------------|----|--------------------|-------------------------------------------------------------|----|--------------------|----------------------------------------|----|--------------------|-------------------|
| 68 | pa_themequo_v2<br>Afficher le champ UNIQUEM<br>ENT si :<br>[pa_jumelage_v2] = '0'          | Consequences on daily life                                                                                                              | checkbox <table border="1" data-bbox="1023 107 1493 965"> <tr> <td>0</td> <td>pa_themequo_v2__0</td> <td>Consequences on children</td> </tr> <tr> <td>1</td> <td>pa_themequo_v2__1</td> <td>Consequences on conjugal life</td> </tr> <tr> <td>2</td> <td>pa_themequo_v2__2</td> <td>Consequences on sexual life</td> </tr> <tr> <td>3</td> <td>pa_themequo_v2__3</td> <td>Returning to work</td> </tr> <tr> <td>4</td> <td>pa_themequo_v2__4</td> <td>The return to daily life</td> </tr> <tr> <td>5</td> <td>pa_themequo_v2__5</td> <td>The consequences on the spiritual life</td> </tr> <tr> <td>6</td> <td>pa_themequo_v2__6</td> <td>How to announce a diagnosis to your loved ones</td> </tr> <tr> <td>7</td> <td>pa_themequo_v2__7</td> <td>Financial implications</td> </tr> <tr> <td>8</td> <td>pa_themequo_v2__8</td> <td>Consequences on insurance</td> </tr> <tr> <td>9</td> <td>pa_themequo_v2__9</td> <td>Consequences on professional life</td> </tr> <tr> <td>10</td> <td>pa_themequo_v2__10</td> <td>Social perception (the reaction of others)</td> </tr> <tr> <td>11</td> <td>pa_themequo_v2__11</td> <td>Strategies for living the treatments in the best conditions</td> </tr> <tr> <td>12</td> <td>pa_themequo_v2__12</td> <td>How to regain control over the disease</td> </tr> <tr> <td>13</td> <td>pa_themequo_v2__13</td> <td>Other information</td> </tr> </table><br>Alignement personnalisé : LV | 0 | pa_themequo_v2__0 | Consequences on children                                                                               | 1 | pa_themequo_v2__1 | Consequences on conjugal life                                     | 2 | pa_themequo_v2__2 | Consequences on sexual life                                                                                                             | 3 | pa_themequo_v2__3 | Returning to work                                                             | 4 | pa_themequo_v2__4 | The return to daily life                                    | 5 | pa_themequo_v2__5 | The consequences on the spiritual life                         | 6 | pa_themequo_v2__6 | How to announce a diagnosis to your loved ones | 7 | pa_themequo_v2__7 | Financial implications | 8 | pa_themequo_v2__8 | Consequences on insurance | 9 | pa_themequo_v2__9 | Consequences on professional life | 10 | pa_themequo_v2__10 | Social perception (the reaction of others) | 11 | pa_themequo_v2__11 | Strategies for living the treatments in the best conditions | 12 | pa_themequo_v2__12 | How to regain control over the disease | 13 | pa_themequo_v2__13 | Other information |
| 0  | pa_themequo_v2__0                                                                          | Consequences on children                                                                                                                |                                                                                                                                                                                                                                                                                                                                                                                                                                                                                                                                                                                                                                                                                                                                                                                                                                                                                                                                                                                                                                                                                                                                                                                                                                                                                                                                                                                                                               |   |                   |                                                                                                        |   |                   |                                                                   |   |                   |                                                                                                                                         |   |                   |                                                                               |   |                   |                                                             |   |                   |                                                                |   |                   |                                                |   |                   |                        |   |                   |                           |   |                   |                                   |    |                    |                                            |    |                    |                                                             |    |                    |                                        |    |                    |                   |
| 1  | pa_themequo_v2__1                                                                          | Consequences on conjugal life                                                                                                           |                                                                                                                                                                                                                                                                                                                                                                                                                                                                                                                                                                                                                                                                                                                                                                                                                                                                                                                                                                                                                                                                                                                                                                                                                                                                                                                                                                                                                               |   |                   |                                                                                                        |   |                   |                                                                   |   |                   |                                                                                                                                         |   |                   |                                                                               |   |                   |                                                             |   |                   |                                                                |   |                   |                                                |   |                   |                        |   |                   |                           |   |                   |                                   |    |                    |                                            |    |                    |                                                             |    |                    |                                        |    |                    |                   |
| 2  | pa_themequo_v2__2                                                                          | Consequences on sexual life                                                                                                             |                                                                                                                                                                                                                                                                                                                                                                                                                                                                                                                                                                                                                                                                                                                                                                                                                                                                                                                                                                                                                                                                                                                                                                                                                                                                                                                                                                                                                               |   |                   |                                                                                                        |   |                   |                                                                   |   |                   |                                                                                                                                         |   |                   |                                                                               |   |                   |                                                             |   |                   |                                                                |   |                   |                                                |   |                   |                        |   |                   |                           |   |                   |                                   |    |                    |                                            |    |                    |                                                             |    |                    |                                        |    |                    |                   |
| 3  | pa_themequo_v2__3                                                                          | Returning to work                                                                                                                       |                                                                                                                                                                                                                                                                                                                                                                                                                                                                                                                                                                                                                                                                                                                                                                                                                                                                                                                                                                                                                                                                                                                                                                                                                                                                                                                                                                                                                               |   |                   |                                                                                                        |   |                   |                                                                   |   |                   |                                                                                                                                         |   |                   |                                                                               |   |                   |                                                             |   |                   |                                                                |   |                   |                                                |   |                   |                        |   |                   |                           |   |                   |                                   |    |                    |                                            |    |                    |                                                             |    |                    |                                        |    |                    |                   |
| 4  | pa_themequo_v2__4                                                                          | The return to daily life                                                                                                                |                                                                                                                                                                                                                                                                                                                                                                                                                                                                                                                                                                                                                                                                                                                                                                                                                                                                                                                                                                                                                                                                                                                                                                                                                                                                                                                                                                                                                               |   |                   |                                                                                                        |   |                   |                                                                   |   |                   |                                                                                                                                         |   |                   |                                                                               |   |                   |                                                             |   |                   |                                                                |   |                   |                                                |   |                   |                        |   |                   |                           |   |                   |                                   |    |                    |                                            |    |                    |                                                             |    |                    |                                        |    |                    |                   |
| 5  | pa_themequo_v2__5                                                                          | The consequences on the spiritual life                                                                                                  |                                                                                                                                                                                                                                                                                                                                                                                                                                                                                                                                                                                                                                                                                                                                                                                                                                                                                                                                                                                                                                                                                                                                                                                                                                                                                                                                                                                                                               |   |                   |                                                                                                        |   |                   |                                                                   |   |                   |                                                                                                                                         |   |                   |                                                                               |   |                   |                                                             |   |                   |                                                                |   |                   |                                                |   |                   |                        |   |                   |                           |   |                   |                                   |    |                    |                                            |    |                    |                                                             |    |                    |                                        |    |                    |                   |
| 6  | pa_themequo_v2__6                                                                          | How to announce a diagnosis to your loved ones                                                                                          |                                                                                                                                                                                                                                                                                                                                                                                                                                                                                                                                                                                                                                                                                                                                                                                                                                                                                                                                                                                                                                                                                                                                                                                                                                                                                                                                                                                                                               |   |                   |                                                                                                        |   |                   |                                                                   |   |                   |                                                                                                                                         |   |                   |                                                                               |   |                   |                                                             |   |                   |                                                                |   |                   |                                                |   |                   |                        |   |                   |                           |   |                   |                                   |    |                    |                                            |    |                    |                                                             |    |                    |                                        |    |                    |                   |
| 7  | pa_themequo_v2__7                                                                          | Financial implications                                                                                                                  |                                                                                                                                                                                                                                                                                                                                                                                                                                                                                                                                                                                                                                                                                                                                                                                                                                                                                                                                                                                                                                                                                                                                                                                                                                                                                                                                                                                                                               |   |                   |                                                                                                        |   |                   |                                                                   |   |                   |                                                                                                                                         |   |                   |                                                                               |   |                   |                                                             |   |                   |                                                                |   |                   |                                                |   |                   |                        |   |                   |                           |   |                   |                                   |    |                    |                                            |    |                    |                                                             |    |                    |                                        |    |                    |                   |
| 8  | pa_themequo_v2__8                                                                          | Consequences on insurance                                                                                                               |                                                                                                                                                                                                                                                                                                                                                                                                                                                                                                                                                                                                                                                                                                                                                                                                                                                                                                                                                                                                                                                                                                                                                                                                                                                                                                                                                                                                                               |   |                   |                                                                                                        |   |                   |                                                                   |   |                   |                                                                                                                                         |   |                   |                                                                               |   |                   |                                                             |   |                   |                                                                |   |                   |                                                |   |                   |                        |   |                   |                           |   |                   |                                   |    |                    |                                            |    |                    |                                                             |    |                    |                                        |    |                    |                   |
| 9  | pa_themequo_v2__9                                                                          | Consequences on professional life                                                                                                       |                                                                                                                                                                                                                                                                                                                                                                                                                                                                                                                                                                                                                                                                                                                                                                                                                                                                                                                                                                                                                                                                                                                                                                                                                                                                                                                                                                                                                               |   |                   |                                                                                                        |   |                   |                                                                   |   |                   |                                                                                                                                         |   |                   |                                                                               |   |                   |                                                             |   |                   |                                                                |   |                   |                                                |   |                   |                        |   |                   |                           |   |                   |                                   |    |                    |                                            |    |                    |                                                             |    |                    |                                        |    |                    |                   |
| 10 | pa_themequo_v2__10                                                                         | Social perception (the reaction of others)                                                                                              |                                                                                                                                                                                                                                                                                                                                                                                                                                                                                                                                                                                                                                                                                                                                                                                                                                                                                                                                                                                                                                                                                                                                                                                                                                                                                                                                                                                                                               |   |                   |                                                                                                        |   |                   |                                                                   |   |                   |                                                                                                                                         |   |                   |                                                                               |   |                   |                                                             |   |                   |                                                                |   |                   |                                                |   |                   |                        |   |                   |                           |   |                   |                                   |    |                    |                                            |    |                    |                                                             |    |                    |                                        |    |                    |                   |
| 11 | pa_themequo_v2__11                                                                         | Strategies for living the treatments in the best conditions                                                                             |                                                                                                                                                                                                                                                                                                                                                                                                                                                                                                                                                                                                                                                                                                                                                                                                                                                                                                                                                                                                                                                                                                                                                                                                                                                                                                                                                                                                                               |   |                   |                                                                                                        |   |                   |                                                                   |   |                   |                                                                                                                                         |   |                   |                                                                               |   |                   |                                                             |   |                   |                                                                |   |                   |                                                |   |                   |                        |   |                   |                           |   |                   |                                   |    |                    |                                            |    |                    |                                                             |    |                    |                                        |    |                    |                   |
| 12 | pa_themequo_v2__12                                                                         | How to regain control over the disease                                                                                                  |                                                                                                                                                                                                                                                                                                                                                                                                                                                                                                                                                                                                                                                                                                                                                                                                                                                                                                                                                                                                                                                                                                                                                                                                                                                                                                                                                                                                                               |   |                   |                                                                                                        |   |                   |                                                                   |   |                   |                                                                                                                                         |   |                   |                                                                               |   |                   |                                                             |   |                   |                                                                |   |                   |                                                |   |                   |                        |   |                   |                           |   |                   |                                   |    |                    |                                            |    |                    |                                                             |    |                    |                                        |    |                    |                   |
| 13 | pa_themequo_v2__13                                                                         | Other information                                                                                                                       |                                                                                                                                                                                                                                                                                                                                                                                                                                                                                                                                                                                                                                                                                                                                                                                                                                                                                                                                                                                                                                                                                                                                                                                                                                                                                                                                                                                                                               |   |                   |                                                                                                        |   |                   |                                                                   |   |                   |                                                                                                                                         |   |                   |                                                                               |   |                   |                                                             |   |                   |                                                                |   |                   |                                                |   |                   |                        |   |                   |                           |   |                   |                                   |    |                    |                                            |    |                    |                                                             |    |                    |                                        |    |                    |                   |
| 69 | pa_themequoautre_v2<br>Afficher le champ UNIQUEM<br>ENT si :<br>[pa_themequo_v2(13)] = '1' | If other information, please specify which one:                                                                                         | text<br>Alignement personnalisé : LV                                                                                                                                                                                                                                                                                                                                                                                                                                                                                                                                                                                                                                                                                                                                                                                                                                                                                                                                                                                                                                                                                                                                                                                                                                                                                                                                                                                          |   |                   |                                                                                                        |   |                   |                                                                   |   |                   |                                                                                                                                         |   |                   |                                                                               |   |                   |                                                             |   |                   |                                                                |   |                   |                                                |   |                   |                        |   |                   |                           |   |                   |                                   |    |                    |                                            |    |                    |                                                             |    |                    |                                        |    |                    |                   |
| 70 | pa_bene_v2<br>Afficher le champ UNIQUEM<br>ENT si :<br>[pa_jumelage_v2] = '0'              | In what area(s) has the accompaniment been beneficial? (You may check more than one answer.)                                            | checkbox <table border="1" data-bbox="1023 1189 1493 1823"> <tr> <td>0</td> <td>pa_bene_v2__0</td> <td>My understanding of my care pathway within the health care institution (steps, role of each person...)</td> </tr> <tr> <td>1</td> <td>pa_bene_v2__1</td> <td>My relationships and exchanges with the medical and nursing teams</td> </tr> <tr> <td>2</td> <td>pa_bene_v2__2</td> <td>My experience of the disease (sharing experiences on side effects, on the impact of the disease on daily life, with those around me...)</td> </tr> <tr> <td>3</td> <td>pa_bene_v2__3</td> <td>My quality of life (decrease in stress level, anxiety, feeling understood...)</td> </tr> <tr> <td>4</td> <td>pa_bene_v2__4</td> <td>My knowledge of services and associations that can help me.</td> </tr> <tr> <td>5</td> <td>pa_bene_v2__5</td> <td>This accompaniment has not been particularly beneficial to me.</td> </tr> <tr> <td>6</td> <td>pa_bene_v2__6</td> <td>Other</td> </tr> </table><br>Alignement personnalisé : LV                                                                                                                                                                                                                                                                                                                                                                                                | 0 | pa_bene_v2__0     | My understanding of my care pathway within the health care institution (steps, role of each person...) | 1 | pa_bene_v2__1     | My relationships and exchanges with the medical and nursing teams | 2 | pa_bene_v2__2     | My experience of the disease (sharing experiences on side effects, on the impact of the disease on daily life, with those around me...) | 3 | pa_bene_v2__3     | My quality of life (decrease in stress level, anxiety, feeling understood...) | 4 | pa_bene_v2__4     | My knowledge of services and associations that can help me. | 5 | pa_bene_v2__5     | This accompaniment has not been particularly beneficial to me. | 6 | pa_bene_v2__6     | Other                                          |   |                   |                        |   |                   |                           |   |                   |                                   |    |                    |                                            |    |                    |                                                             |    |                    |                                        |    |                    |                   |
| 0  | pa_bene_v2__0                                                                              | My understanding of my care pathway within the health care institution (steps, role of each person...)                                  |                                                                                                                                                                                                                                                                                                                                                                                                                                                                                                                                                                                                                                                                                                                                                                                                                                                                                                                                                                                                                                                                                                                                                                                                                                                                                                                                                                                                                               |   |                   |                                                                                                        |   |                   |                                                                   |   |                   |                                                                                                                                         |   |                   |                                                                               |   |                   |                                                             |   |                   |                                                                |   |                   |                                                |   |                   |                        |   |                   |                           |   |                   |                                   |    |                    |                                            |    |                    |                                                             |    |                    |                                        |    |                    |                   |
| 1  | pa_bene_v2__1                                                                              | My relationships and exchanges with the medical and nursing teams                                                                       |                                                                                                                                                                                                                                                                                                                                                                                                                                                                                                                                                                                                                                                                                                                                                                                                                                                                                                                                                                                                                                                                                                                                                                                                                                                                                                                                                                                                                               |   |                   |                                                                                                        |   |                   |                                                                   |   |                   |                                                                                                                                         |   |                   |                                                                               |   |                   |                                                             |   |                   |                                                                |   |                   |                                                |   |                   |                        |   |                   |                           |   |                   |                                   |    |                    |                                            |    |                    |                                                             |    |                    |                                        |    |                    |                   |
| 2  | pa_bene_v2__2                                                                              | My experience of the disease (sharing experiences on side effects, on the impact of the disease on daily life, with those around me...) |                                                                                                                                                                                                                                                                                                                                                                                                                                                                                                                                                                                                                                                                                                                                                                                                                                                                                                                                                                                                                                                                                                                                                                                                                                                                                                                                                                                                                               |   |                   |                                                                                                        |   |                   |                                                                   |   |                   |                                                                                                                                         |   |                   |                                                                               |   |                   |                                                             |   |                   |                                                                |   |                   |                                                |   |                   |                        |   |                   |                           |   |                   |                                   |    |                    |                                            |    |                    |                                                             |    |                    |                                        |    |                    |                   |
| 3  | pa_bene_v2__3                                                                              | My quality of life (decrease in stress level, anxiety, feeling understood...)                                                           |                                                                                                                                                                                                                                                                                                                                                                                                                                                                                                                                                                                                                                                                                                                                                                                                                                                                                                                                                                                                                                                                                                                                                                                                                                                                                                                                                                                                                               |   |                   |                                                                                                        |   |                   |                                                                   |   |                   |                                                                                                                                         |   |                   |                                                                               |   |                   |                                                             |   |                   |                                                                |   |                   |                                                |   |                   |                        |   |                   |                           |   |                   |                                   |    |                    |                                            |    |                    |                                                             |    |                    |                                        |    |                    |                   |
| 4  | pa_bene_v2__4                                                                              | My knowledge of services and associations that can help me.                                                                             |                                                                                                                                                                                                                                                                                                                                                                                                                                                                                                                                                                                                                                                                                                                                                                                                                                                                                                                                                                                                                                                                                                                                                                                                                                                                                                                                                                                                                               |   |                   |                                                                                                        |   |                   |                                                                   |   |                   |                                                                                                                                         |   |                   |                                                                               |   |                   |                                                             |   |                   |                                                                |   |                   |                                                |   |                   |                        |   |                   |                           |   |                   |                                   |    |                    |                                            |    |                    |                                                             |    |                    |                                        |    |                    |                   |
| 5  | pa_bene_v2__5                                                                              | This accompaniment has not been particularly beneficial to me.                                                                          |                                                                                                                                                                                                                                                                                                                                                                                                                                                                                                                                                                                                                                                                                                                                                                                                                                                                                                                                                                                                                                                                                                                                                                                                                                                                                                                                                                                                                               |   |                   |                                                                                                        |   |                   |                                                                   |   |                   |                                                                                                                                         |   |                   |                                                                               |   |                   |                                                             |   |                   |                                                                |   |                   |                                                |   |                   |                        |   |                   |                           |   |                   |                                   |    |                    |                                            |    |                    |                                                             |    |                    |                                        |    |                    |                   |
| 6  | pa_bene_v2__6                                                                              | Other                                                                                                                                   |                                                                                                                                                                                                                                                                                                                                                                                                                                                                                                                                                                                                                                                                                                                                                                                                                                                                                                                                                                                                                                                                                                                                                                                                                                                                                                                                                                                                                               |   |                   |                                                                                                        |   |                   |                                                                   |   |                   |                                                                                                                                         |   |                   |                                                                               |   |                   |                                                             |   |                   |                                                                |   |                   |                                                |   |                   |                        |   |                   |                           |   |                   |                                   |    |                    |                                            |    |                    |                                                             |    |                    |                                        |    |                    |                   |
| 71 | pa_bene_v2_autre<br>Afficher le champ UNIQUEM<br>ENT si :<br>[pa_bene_v2(6)] = '1'         | If other benefit, please specify which one:                                                                                             | text<br>Alignement personnalisé : LV                                                                                                                                                                                                                                                                                                                                                                                                                                                                                                                                                                                                                                                                                                                                                                                                                                                                                                                                                                                                                                                                                                                                                                                                                                                                                                                                                                                          |   |                   |                                                                                                        |   |                   |                                                                   |   |                   |                                                                                                                                         |   |                   |                                                                               |   |                   |                                                             |   |                   |                                                                |   |                   |                                                |   |                   |                        |   |                   |                           |   |                   |                                   |    |                    |                                            |    |                    |                                                             |    |                    |                                        |    |                    |                   |

| 72       | <p>pa_contri_v2</p> <p>Afficher le champ UNIQUEM<br/>ENT si :<br/>[pa_jumelage_v2] = '0'</p>        | <p>In your opinion, what was the contribution of the patient advisor? You may check more than one answer.</p>  | <table border="1"> <thead> <tr> <th colspan="3">checkbox</th> </tr> </thead> <tbody> <tr> <td>0</td> <td>pa_contri_v2__0</td> <td>Giving information</td> </tr> <tr> <td>1</td> <td>pa_contri_v2__1</td> <td>Giving support</td> </tr> <tr> <td>2</td> <td>pa_contri_v2__2</td> <td>Sharing experiences</td> </tr> <tr> <td>3</td> <td>pa_contri_v2__3</td> <td>Facilitate communication between the health care team and the patient advisor.</td> </tr> <tr> <td>4</td> <td>pa_contri_v2__4</td> <td>Helping to bring the patient's perspective to the health care team</td> </tr> <tr> <td>5</td> <td>pa_contri_v2__5</td> <td>Improve understanding of information shared between the patient and the health care team</td> </tr> <tr> <td>6</td> <td>pa_contri_v2__6</td> <td>Helping to remember information</td> </tr> <tr> <td>7</td> <td>pa_contri_v2__7</td> <td>Preparing the patient for medical appointments</td> </tr> <tr> <td>8</td> <td>pa_contri_v2__8</td> <td>Accompanying patients to medical appointments</td> </tr> <tr> <td>9</td> <td>pa_contri_v2__9</td> <td>Helping the patient participate in decision making</td> </tr> <tr> <td>10</td> <td>pa_contri_v2__10</td> <td>Bringing a new perspective to decision making</td> </tr> <tr> <td>11</td> <td>pa_contri_v2__11</td> <td>Referring patients to a variety of resources</td> </tr> <tr> <td>12</td> <td>pa_contri_v2__12</td> <td>Help develop a trusting relationship between the patient and the health care team</td> </tr> <tr> <td>13</td> <td>pa_contri_v2__13</td> <td>Helping the patient become a partner in his or her own care</td> </tr> <tr> <td>14</td> <td>pa_contri_v2__14</td> <td>Listening to the patient</td> </tr> <tr> <td>15</td> <td>pa_contri_v2__15</td> <td>Other contributions</td> </tr> <tr> <td>16</td> <td>pa_contri_v2__16</td> <td>No, the patient advisor has no particular contribution to make to the care trajectory.</td> </tr> </tbody> </table> <p>Alignement personnalisé : LV</p> | checkbox |  |  | 0 | pa_contri_v2__0 | Giving information | 1 | pa_contri_v2__1 | Giving support | 2 | pa_contri_v2__2 | Sharing experiences | 3 | pa_contri_v2__3 | Facilitate communication between the health care team and the patient advisor. | 4 | pa_contri_v2__4 | Helping to bring the patient's perspective to the health care team | 5 | pa_contri_v2__5 | Improve understanding of information shared between the patient and the health care team | 6 | pa_contri_v2__6 | Helping to remember information | 7 | pa_contri_v2__7 | Preparing the patient for medical appointments | 8 | pa_contri_v2__8 | Accompanying patients to medical appointments | 9 | pa_contri_v2__9 | Helping the patient participate in decision making | 10 | pa_contri_v2__10 | Bringing a new perspective to decision making | 11 | pa_contri_v2__11 | Referring patients to a variety of resources | 12 | pa_contri_v2__12 | Help develop a trusting relationship between the patient and the health care team | 13 | pa_contri_v2__13 | Helping the patient become a partner in his or her own care | 14 | pa_contri_v2__14 | Listening to the patient | 15 | pa_contri_v2__15 | Other contributions | 16 | pa_contri_v2__16 | No, the patient advisor has no particular contribution to make to the care trajectory. |
|----------|-----------------------------------------------------------------------------------------------------|----------------------------------------------------------------------------------------------------------------|----------------------------------------------------------------------------------------------------------------------------------------------------------------------------------------------------------------------------------------------------------------------------------------------------------------------------------------------------------------------------------------------------------------------------------------------------------------------------------------------------------------------------------------------------------------------------------------------------------------------------------------------------------------------------------------------------------------------------------------------------------------------------------------------------------------------------------------------------------------------------------------------------------------------------------------------------------------------------------------------------------------------------------------------------------------------------------------------------------------------------------------------------------------------------------------------------------------------------------------------------------------------------------------------------------------------------------------------------------------------------------------------------------------------------------------------------------------------------------------------------------------------------------------------------------------------------------------------------------------------------------------------------------------------------------------------------------------------------------------------------------------------------------------------------------------------------------------------------------------------------------------------------------------------------------------------------------------------------------------------------------------|----------|--|--|---|-----------------|--------------------|---|-----------------|----------------|---|-----------------|---------------------|---|-----------------|--------------------------------------------------------------------------------|---|-----------------|--------------------------------------------------------------------|---|-----------------|------------------------------------------------------------------------------------------|---|-----------------|---------------------------------|---|-----------------|------------------------------------------------|---|-----------------|-----------------------------------------------|---|-----------------|----------------------------------------------------|----|------------------|-----------------------------------------------|----|------------------|----------------------------------------------|----|------------------|-----------------------------------------------------------------------------------|----|------------------|-------------------------------------------------------------|----|------------------|--------------------------|----|------------------|---------------------|----|------------------|----------------------------------------------------------------------------------------|
| checkbox |                                                                                                     |                                                                                                                |                                                                                                                                                                                                                                                                                                                                                                                                                                                                                                                                                                                                                                                                                                                                                                                                                                                                                                                                                                                                                                                                                                                                                                                                                                                                                                                                                                                                                                                                                                                                                                                                                                                                                                                                                                                                                                                                                                                                                                                                                |          |  |  |   |                 |                    |   |                 |                |   |                 |                     |   |                 |                                                                                |   |                 |                                                                    |   |                 |                                                                                          |   |                 |                                 |   |                 |                                                |   |                 |                                               |   |                 |                                                    |    |                  |                                               |    |                  |                                              |    |                  |                                                                                   |    |                  |                                                             |    |                  |                          |    |                  |                     |    |                  |                                                                                        |
| 0        | pa_contri_v2__0                                                                                     | Giving information                                                                                             |                                                                                                                                                                                                                                                                                                                                                                                                                                                                                                                                                                                                                                                                                                                                                                                                                                                                                                                                                                                                                                                                                                                                                                                                                                                                                                                                                                                                                                                                                                                                                                                                                                                                                                                                                                                                                                                                                                                                                                                                                |          |  |  |   |                 |                    |   |                 |                |   |                 |                     |   |                 |                                                                                |   |                 |                                                                    |   |                 |                                                                                          |   |                 |                                 |   |                 |                                                |   |                 |                                               |   |                 |                                                    |    |                  |                                               |    |                  |                                              |    |                  |                                                                                   |    |                  |                                                             |    |                  |                          |    |                  |                     |    |                  |                                                                                        |
| 1        | pa_contri_v2__1                                                                                     | Giving support                                                                                                 |                                                                                                                                                                                                                                                                                                                                                                                                                                                                                                                                                                                                                                                                                                                                                                                                                                                                                                                                                                                                                                                                                                                                                                                                                                                                                                                                                                                                                                                                                                                                                                                                                                                                                                                                                                                                                                                                                                                                                                                                                |          |  |  |   |                 |                    |   |                 |                |   |                 |                     |   |                 |                                                                                |   |                 |                                                                    |   |                 |                                                                                          |   |                 |                                 |   |                 |                                                |   |                 |                                               |   |                 |                                                    |    |                  |                                               |    |                  |                                              |    |                  |                                                                                   |    |                  |                                                             |    |                  |                          |    |                  |                     |    |                  |                                                                                        |
| 2        | pa_contri_v2__2                                                                                     | Sharing experiences                                                                                            |                                                                                                                                                                                                                                                                                                                                                                                                                                                                                                                                                                                                                                                                                                                                                                                                                                                                                                                                                                                                                                                                                                                                                                                                                                                                                                                                                                                                                                                                                                                                                                                                                                                                                                                                                                                                                                                                                                                                                                                                                |          |  |  |   |                 |                    |   |                 |                |   |                 |                     |   |                 |                                                                                |   |                 |                                                                    |   |                 |                                                                                          |   |                 |                                 |   |                 |                                                |   |                 |                                               |   |                 |                                                    |    |                  |                                               |    |                  |                                              |    |                  |                                                                                   |    |                  |                                                             |    |                  |                          |    |                  |                     |    |                  |                                                                                        |
| 3        | pa_contri_v2__3                                                                                     | Facilitate communication between the health care team and the patient advisor.                                 |                                                                                                                                                                                                                                                                                                                                                                                                                                                                                                                                                                                                                                                                                                                                                                                                                                                                                                                                                                                                                                                                                                                                                                                                                                                                                                                                                                                                                                                                                                                                                                                                                                                                                                                                                                                                                                                                                                                                                                                                                |          |  |  |   |                 |                    |   |                 |                |   |                 |                     |   |                 |                                                                                |   |                 |                                                                    |   |                 |                                                                                          |   |                 |                                 |   |                 |                                                |   |                 |                                               |   |                 |                                                    |    |                  |                                               |    |                  |                                              |    |                  |                                                                                   |    |                  |                                                             |    |                  |                          |    |                  |                     |    |                  |                                                                                        |
| 4        | pa_contri_v2__4                                                                                     | Helping to bring the patient's perspective to the health care team                                             |                                                                                                                                                                                                                                                                                                                                                                                                                                                                                                                                                                                                                                                                                                                                                                                                                                                                                                                                                                                                                                                                                                                                                                                                                                                                                                                                                                                                                                                                                                                                                                                                                                                                                                                                                                                                                                                                                                                                                                                                                |          |  |  |   |                 |                    |   |                 |                |   |                 |                     |   |                 |                                                                                |   |                 |                                                                    |   |                 |                                                                                          |   |                 |                                 |   |                 |                                                |   |                 |                                               |   |                 |                                                    |    |                  |                                               |    |                  |                                              |    |                  |                                                                                   |    |                  |                                                             |    |                  |                          |    |                  |                     |    |                  |                                                                                        |
| 5        | pa_contri_v2__5                                                                                     | Improve understanding of information shared between the patient and the health care team                       |                                                                                                                                                                                                                                                                                                                                                                                                                                                                                                                                                                                                                                                                                                                                                                                                                                                                                                                                                                                                                                                                                                                                                                                                                                                                                                                                                                                                                                                                                                                                                                                                                                                                                                                                                                                                                                                                                                                                                                                                                |          |  |  |   |                 |                    |   |                 |                |   |                 |                     |   |                 |                                                                                |   |                 |                                                                    |   |                 |                                                                                          |   |                 |                                 |   |                 |                                                |   |                 |                                               |   |                 |                                                    |    |                  |                                               |    |                  |                                              |    |                  |                                                                                   |    |                  |                                                             |    |                  |                          |    |                  |                     |    |                  |                                                                                        |
| 6        | pa_contri_v2__6                                                                                     | Helping to remember information                                                                                |                                                                                                                                                                                                                                                                                                                                                                                                                                                                                                                                                                                                                                                                                                                                                                                                                                                                                                                                                                                                                                                                                                                                                                                                                                                                                                                                                                                                                                                                                                                                                                                                                                                                                                                                                                                                                                                                                                                                                                                                                |          |  |  |   |                 |                    |   |                 |                |   |                 |                     |   |                 |                                                                                |   |                 |                                                                    |   |                 |                                                                                          |   |                 |                                 |   |                 |                                                |   |                 |                                               |   |                 |                                                    |    |                  |                                               |    |                  |                                              |    |                  |                                                                                   |    |                  |                                                             |    |                  |                          |    |                  |                     |    |                  |                                                                                        |
| 7        | pa_contri_v2__7                                                                                     | Preparing the patient for medical appointments                                                                 |                                                                                                                                                                                                                                                                                                                                                                                                                                                                                                                                                                                                                                                                                                                                                                                                                                                                                                                                                                                                                                                                                                                                                                                                                                                                                                                                                                                                                                                                                                                                                                                                                                                                                                                                                                                                                                                                                                                                                                                                                |          |  |  |   |                 |                    |   |                 |                |   |                 |                     |   |                 |                                                                                |   |                 |                                                                    |   |                 |                                                                                          |   |                 |                                 |   |                 |                                                |   |                 |                                               |   |                 |                                                    |    |                  |                                               |    |                  |                                              |    |                  |                                                                                   |    |                  |                                                             |    |                  |                          |    |                  |                     |    |                  |                                                                                        |
| 8        | pa_contri_v2__8                                                                                     | Accompanying patients to medical appointments                                                                  |                                                                                                                                                                                                                                                                                                                                                                                                                                                                                                                                                                                                                                                                                                                                                                                                                                                                                                                                                                                                                                                                                                                                                                                                                                                                                                                                                                                                                                                                                                                                                                                                                                                                                                                                                                                                                                                                                                                                                                                                                |          |  |  |   |                 |                    |   |                 |                |   |                 |                     |   |                 |                                                                                |   |                 |                                                                    |   |                 |                                                                                          |   |                 |                                 |   |                 |                                                |   |                 |                                               |   |                 |                                                    |    |                  |                                               |    |                  |                                              |    |                  |                                                                                   |    |                  |                                                             |    |                  |                          |    |                  |                     |    |                  |                                                                                        |
| 9        | pa_contri_v2__9                                                                                     | Helping the patient participate in decision making                                                             |                                                                                                                                                                                                                                                                                                                                                                                                                                                                                                                                                                                                                                                                                                                                                                                                                                                                                                                                                                                                                                                                                                                                                                                                                                                                                                                                                                                                                                                                                                                                                                                                                                                                                                                                                                                                                                                                                                                                                                                                                |          |  |  |   |                 |                    |   |                 |                |   |                 |                     |   |                 |                                                                                |   |                 |                                                                    |   |                 |                                                                                          |   |                 |                                 |   |                 |                                                |   |                 |                                               |   |                 |                                                    |    |                  |                                               |    |                  |                                              |    |                  |                                                                                   |    |                  |                                                             |    |                  |                          |    |                  |                     |    |                  |                                                                                        |
| 10       | pa_contri_v2__10                                                                                    | Bringing a new perspective to decision making                                                                  |                                                                                                                                                                                                                                                                                                                                                                                                                                                                                                                                                                                                                                                                                                                                                                                                                                                                                                                                                                                                                                                                                                                                                                                                                                                                                                                                                                                                                                                                                                                                                                                                                                                                                                                                                                                                                                                                                                                                                                                                                |          |  |  |   |                 |                    |   |                 |                |   |                 |                     |   |                 |                                                                                |   |                 |                                                                    |   |                 |                                                                                          |   |                 |                                 |   |                 |                                                |   |                 |                                               |   |                 |                                                    |    |                  |                                               |    |                  |                                              |    |                  |                                                                                   |    |                  |                                                             |    |                  |                          |    |                  |                     |    |                  |                                                                                        |
| 11       | pa_contri_v2__11                                                                                    | Referring patients to a variety of resources                                                                   |                                                                                                                                                                                                                                                                                                                                                                                                                                                                                                                                                                                                                                                                                                                                                                                                                                                                                                                                                                                                                                                                                                                                                                                                                                                                                                                                                                                                                                                                                                                                                                                                                                                                                                                                                                                                                                                                                                                                                                                                                |          |  |  |   |                 |                    |   |                 |                |   |                 |                     |   |                 |                                                                                |   |                 |                                                                    |   |                 |                                                                                          |   |                 |                                 |   |                 |                                                |   |                 |                                               |   |                 |                                                    |    |                  |                                               |    |                  |                                              |    |                  |                                                                                   |    |                  |                                                             |    |                  |                          |    |                  |                     |    |                  |                                                                                        |
| 12       | pa_contri_v2__12                                                                                    | Help develop a trusting relationship between the patient and the health care team                              |                                                                                                                                                                                                                                                                                                                                                                                                                                                                                                                                                                                                                                                                                                                                                                                                                                                                                                                                                                                                                                                                                                                                                                                                                                                                                                                                                                                                                                                                                                                                                                                                                                                                                                                                                                                                                                                                                                                                                                                                                |          |  |  |   |                 |                    |   |                 |                |   |                 |                     |   |                 |                                                                                |   |                 |                                                                    |   |                 |                                                                                          |   |                 |                                 |   |                 |                                                |   |                 |                                               |   |                 |                                                    |    |                  |                                               |    |                  |                                              |    |                  |                                                                                   |    |                  |                                                             |    |                  |                          |    |                  |                     |    |                  |                                                                                        |
| 13       | pa_contri_v2__13                                                                                    | Helping the patient become a partner in his or her own care                                                    |                                                                                                                                                                                                                                                                                                                                                                                                                                                                                                                                                                                                                                                                                                                                                                                                                                                                                                                                                                                                                                                                                                                                                                                                                                                                                                                                                                                                                                                                                                                                                                                                                                                                                                                                                                                                                                                                                                                                                                                                                |          |  |  |   |                 |                    |   |                 |                |   |                 |                     |   |                 |                                                                                |   |                 |                                                                    |   |                 |                                                                                          |   |                 |                                 |   |                 |                                                |   |                 |                                               |   |                 |                                                    |    |                  |                                               |    |                  |                                              |    |                  |                                                                                   |    |                  |                                                             |    |                  |                          |    |                  |                     |    |                  |                                                                                        |
| 14       | pa_contri_v2__14                                                                                    | Listening to the patient                                                                                       |                                                                                                                                                                                                                                                                                                                                                                                                                                                                                                                                                                                                                                                                                                                                                                                                                                                                                                                                                                                                                                                                                                                                                                                                                                                                                                                                                                                                                                                                                                                                                                                                                                                                                                                                                                                                                                                                                                                                                                                                                |          |  |  |   |                 |                    |   |                 |                |   |                 |                     |   |                 |                                                                                |   |                 |                                                                    |   |                 |                                                                                          |   |                 |                                 |   |                 |                                                |   |                 |                                               |   |                 |                                                    |    |                  |                                               |    |                  |                                              |    |                  |                                                                                   |    |                  |                                                             |    |                  |                          |    |                  |                     |    |                  |                                                                                        |
| 15       | pa_contri_v2__15                                                                                    | Other contributions                                                                                            |                                                                                                                                                                                                                                                                                                                                                                                                                                                                                                                                                                                                                                                                                                                                                                                                                                                                                                                                                                                                                                                                                                                                                                                                                                                                                                                                                                                                                                                                                                                                                                                                                                                                                                                                                                                                                                                                                                                                                                                                                |          |  |  |   |                 |                    |   |                 |                |   |                 |                     |   |                 |                                                                                |   |                 |                                                                    |   |                 |                                                                                          |   |                 |                                 |   |                 |                                                |   |                 |                                               |   |                 |                                                    |    |                  |                                               |    |                  |                                              |    |                  |                                                                                   |    |                  |                                                             |    |                  |                          |    |                  |                     |    |                  |                                                                                        |
| 16       | pa_contri_v2__16                                                                                    | No, the patient advisor has no particular contribution to make to the care trajectory.                         |                                                                                                                                                                                                                                                                                                                                                                                                                                                                                                                                                                                                                                                                                                                                                                                                                                                                                                                                                                                                                                                                                                                                                                                                                                                                                                                                                                                                                                                                                                                                                                                                                                                                                                                                                                                                                                                                                                                                                                                                                |          |  |  |   |                 |                    |   |                 |                |   |                 |                     |   |                 |                                                                                |   |                 |                                                                    |   |                 |                                                                                          |   |                 |                                 |   |                 |                                                |   |                 |                                               |   |                 |                                                    |    |                  |                                               |    |                  |                                              |    |                  |                                                                                   |    |                  |                                                             |    |                  |                          |    |                  |                     |    |                  |                                                                                        |
| 73       | <p>pa_contriautre_v2</p> <p>Afficher le champ UNIQUEM<br/>ENT si :<br/>[pa_contri_v2(15)] = '1'</p> | <p>Please indicate what other contributions the patient advisor has had.</p>                                   | <p>text</p> <p>Alignement personnalisé : LV</p>                                                                                                                                                                                                                                                                                                                                                                                                                                                                                                                                                                                                                                                                                                                                                                                                                                                                                                                                                                                                                                                                                                                                                                                                                                                                                                                                                                                                                                                                                                                                                                                                                                                                                                                                                                                                                                                                                                                                                                |          |  |  |   |                 |                    |   |                 |                |   |                 |                     |   |                 |                                                                                |   |                 |                                                                    |   |                 |                                                                                          |   |                 |                                 |   |                 |                                                |   |                 |                                               |   |                 |                                                    |    |                  |                                               |    |                  |                                              |    |                  |                                                                                   |    |                  |                                                             |    |                  |                          |    |                  |                     |    |                  |                                                                                        |
| 74       | <p>pa_bidon3_v2_v2_v2</p> <p>Afficher le champ UNIQUEM<br/>ENT si :<br/>[pa_jumelage_v2] = '1'</p>  | <p>What topics would you have liked to discuss with a patient advisor? You can check more than one answer.</p> | <p>descriptive</p>                                                                                                                                                                                                                                                                                                                                                                                                                                                                                                                                                                                                                                                                                                                                                                                                                                                                                                                                                                                                                                                                                                                                                                                                                                                                                                                                                                                                                                                                                                                                                                                                                                                                                                                                                                                                                                                                                                                                                                                             |          |  |  |   |                 |                    |   |                 |                |   |                 |                     |   |                 |                                                                                |   |                 |                                                                    |   |                 |                                                                                          |   |                 |                                 |   |                 |                                                |   |                 |                                               |   |                 |                                                    |    |                  |                                               |    |                  |                                              |    |                  |                                                                                   |    |                  |                                                             |    |                  |                          |    |                  |                     |    |                  |                                                                                        |

|    |                                                                                     |                                                                  |                                                                                                                                                                                                                                                                                                                                                                                                                                                                                                                                                                                                                                                                                                                                                                                                                                                                                                                                                                                                                                                                                                                                                                                                                                                                                                                                                                                                                                                                                                                                                                                                                                                                                                                                                                                                                                               |   |                |                                 |   |                |                                                 |   |                |                                                 |   |                |                     |   |                |                                                                  |   |                |                                              |   |                |                                                              |   |                |                                  |   |                |                   |
|----|-------------------------------------------------------------------------------------|------------------------------------------------------------------|-----------------------------------------------------------------------------------------------------------------------------------------------------------------------------------------------------------------------------------------------------------------------------------------------------------------------------------------------------------------------------------------------------------------------------------------------------------------------------------------------------------------------------------------------------------------------------------------------------------------------------------------------------------------------------------------------------------------------------------------------------------------------------------------------------------------------------------------------------------------------------------------------------------------------------------------------------------------------------------------------------------------------------------------------------------------------------------------------------------------------------------------------------------------------------------------------------------------------------------------------------------------------------------------------------------------------------------------------------------------------------------------------------------------------------------------------------------------------------------------------------------------------------------------------------------------------------------------------------------------------------------------------------------------------------------------------------------------------------------------------------------------------------------------------------------------------------------------------|---|----------------|---------------------------------|---|----------------|-------------------------------------------------|---|----------------|-------------------------------------------------|---|----------------|---------------------|---|----------------|------------------------------------------------------------------|---|----------------|----------------------------------------------|---|----------------|--------------------------------------------------------------|---|----------------|----------------------------------|---|----------------|-------------------|
| 75 | pa_orgpo_v2<br>Afficher le champ UNIQUEM<br>ENT si :<br>[pa_jumelage_v2] = '1'      | Organizational aspects                                           | checkbox <table border="1" data-bbox="1021 107 1495 667"> <tr> <td data-bbox="1021 107 1053 174">0</td> <td data-bbox="1053 107 1216 174">pa_orgpo_v2__0</td> <td data-bbox="1216 107 1495 174">Her/His role as patient advisor</td> </tr> <tr> <td data-bbox="1021 174 1053 241">1</td> <td data-bbox="1053 174 1216 241">pa_orgpo_v2__1</td> <td data-bbox="1216 174 1495 241">The role of different health care professionals</td> </tr> <tr> <td data-bbox="1021 241 1053 309">2</td> <td data-bbox="1053 241 1216 309">pa_orgpo_v2__2</td> <td data-bbox="1216 241 1495 309">The role of external and internal organizations</td> </tr> <tr> <td data-bbox="1021 309 1053 342">3</td> <td data-bbox="1053 309 1216 342">pa_orgpo_v2__3</td> <td data-bbox="1216 309 1495 342">The care trajectory</td> </tr> <tr> <td data-bbox="1021 342 1053 432">4</td> <td data-bbox="1053 342 1216 432">pa_orgpo_v2__4</td> <td data-bbox="1216 342 1495 432">Rights as a patient (e.g., refusing treatment, asking questions)</td> </tr> <tr> <td data-bbox="1021 432 1053 499">5</td> <td data-bbox="1053 432 1216 499">pa_orgpo_v2__5</td> <td data-bbox="1216 432 1495 499">Where and how to get to medical appointments</td> </tr> <tr> <td data-bbox="1021 499 1053 566">6</td> <td data-bbox="1053 499 1216 566">pa_orgpo_v2__6</td> <td data-bbox="1216 499 1495 566">Financial support for patients and transportation assistance</td> </tr> <tr> <td data-bbox="1021 566 1053 633">7</td> <td data-bbox="1053 566 1216 633">pa_orgpo_v2__7</td> <td data-bbox="1216 566 1495 633">The Parole-Onco Research Project</td> </tr> <tr> <td data-bbox="1021 633 1053 667">8</td> <td data-bbox="1053 633 1216 667">pa_orgpo_v2__8</td> <td data-bbox="1216 633 1495 667">Other information</td> </tr> </table><br>Alignement personnalisé : LV | 0 | pa_orgpo_v2__0 | Her/His role as patient advisor | 1 | pa_orgpo_v2__1 | The role of different health care professionals | 2 | pa_orgpo_v2__2 | The role of external and internal organizations | 3 | pa_orgpo_v2__3 | The care trajectory | 4 | pa_orgpo_v2__4 | Rights as a patient (e.g., refusing treatment, asking questions) | 5 | pa_orgpo_v2__5 | Where and how to get to medical appointments | 6 | pa_orgpo_v2__6 | Financial support for patients and transportation assistance | 7 | pa_orgpo_v2__7 | The Parole-Onco Research Project | 8 | pa_orgpo_v2__8 | Other information |
| 0  | pa_orgpo_v2__0                                                                      | Her/His role as patient advisor                                  |                                                                                                                                                                                                                                                                                                                                                                                                                                                                                                                                                                                                                                                                                                                                                                                                                                                                                                                                                                                                                                                                                                                                                                                                                                                                                                                                                                                                                                                                                                                                                                                                                                                                                                                                                                                                                                               |   |                |                                 |   |                |                                                 |   |                |                                                 |   |                |                     |   |                |                                                                  |   |                |                                              |   |                |                                                              |   |                |                                  |   |                |                   |
| 1  | pa_orgpo_v2__1                                                                      | The role of different health care professionals                  |                                                                                                                                                                                                                                                                                                                                                                                                                                                                                                                                                                                                                                                                                                                                                                                                                                                                                                                                                                                                                                                                                                                                                                                                                                                                                                                                                                                                                                                                                                                                                                                                                                                                                                                                                                                                                                               |   |                |                                 |   |                |                                                 |   |                |                                                 |   |                |                     |   |                |                                                                  |   |                |                                              |   |                |                                                              |   |                |                                  |   |                |                   |
| 2  | pa_orgpo_v2__2                                                                      | The role of external and internal organizations                  |                                                                                                                                                                                                                                                                                                                                                                                                                                                                                                                                                                                                                                                                                                                                                                                                                                                                                                                                                                                                                                                                                                                                                                                                                                                                                                                                                                                                                                                                                                                                                                                                                                                                                                                                                                                                                                               |   |                |                                 |   |                |                                                 |   |                |                                                 |   |                |                     |   |                |                                                                  |   |                |                                              |   |                |                                                              |   |                |                                  |   |                |                   |
| 3  | pa_orgpo_v2__3                                                                      | The care trajectory                                              |                                                                                                                                                                                                                                                                                                                                                                                                                                                                                                                                                                                                                                                                                                                                                                                                                                                                                                                                                                                                                                                                                                                                                                                                                                                                                                                                                                                                                                                                                                                                                                                                                                                                                                                                                                                                                                               |   |                |                                 |   |                |                                                 |   |                |                                                 |   |                |                     |   |                |                                                                  |   |                |                                              |   |                |                                                              |   |                |                                  |   |                |                   |
| 4  | pa_orgpo_v2__4                                                                      | Rights as a patient (e.g., refusing treatment, asking questions) |                                                                                                                                                                                                                                                                                                                                                                                                                                                                                                                                                                                                                                                                                                                                                                                                                                                                                                                                                                                                                                                                                                                                                                                                                                                                                                                                                                                                                                                                                                                                                                                                                                                                                                                                                                                                                                               |   |                |                                 |   |                |                                                 |   |                |                                                 |   |                |                     |   |                |                                                                  |   |                |                                              |   |                |                                                              |   |                |                                  |   |                |                   |
| 5  | pa_orgpo_v2__5                                                                      | Where and how to get to medical appointments                     |                                                                                                                                                                                                                                                                                                                                                                                                                                                                                                                                                                                                                                                                                                                                                                                                                                                                                                                                                                                                                                                                                                                                                                                                                                                                                                                                                                                                                                                                                                                                                                                                                                                                                                                                                                                                                                               |   |                |                                 |   |                |                                                 |   |                |                                                 |   |                |                     |   |                |                                                                  |   |                |                                              |   |                |                                                              |   |                |                                  |   |                |                   |
| 6  | pa_orgpo_v2__6                                                                      | Financial support for patients and transportation assistance     |                                                                                                                                                                                                                                                                                                                                                                                                                                                                                                                                                                                                                                                                                                                                                                                                                                                                                                                                                                                                                                                                                                                                                                                                                                                                                                                                                                                                                                                                                                                                                                                                                                                                                                                                                                                                                                               |   |                |                                 |   |                |                                                 |   |                |                                                 |   |                |                     |   |                |                                                                  |   |                |                                              |   |                |                                                              |   |                |                                  |   |                |                   |
| 7  | pa_orgpo_v2__7                                                                      | The Parole-Onco Research Project                                 |                                                                                                                                                                                                                                                                                                                                                                                                                                                                                                                                                                                                                                                                                                                                                                                                                                                                                                                                                                                                                                                                                                                                                                                                                                                                                                                                                                                                                                                                                                                                                                                                                                                                                                                                                                                                                                               |   |                |                                 |   |                |                                                 |   |                |                                                 |   |                |                     |   |                |                                                                  |   |                |                                              |   |                |                                                              |   |                |                                  |   |                |                   |
| 8  | pa_orgpo_v2__8                                                                      | Other information                                                |                                                                                                                                                                                                                                                                                                                                                                                                                                                                                                                                                                                                                                                                                                                                                                                                                                                                                                                                                                                                                                                                                                                                                                                                                                                                                                                                                                                                                                                                                                                                                                                                                                                                                                                                                                                                                                               |   |                |                                 |   |                |                                                 |   |                |                                                 |   |                |                     |   |                |                                                                  |   |                |                                              |   |                |                                                              |   |                |                                  |   |                |                   |
| 76 | pa_orgpoautre_v2<br>Afficher le champ UNIQUEM<br>ENT si :<br>[pa_orgpo_v2(8)] = '1' | If other information, please specify which one:                  | text<br>Alignement personnalisé : LV                                                                                                                                                                                                                                                                                                                                                                                                                                                                                                                                                                                                                                                                                                                                                                                                                                                                                                                                                                                                                                                                                                                                                                                                                                                                                                                                                                                                                                                                                                                                                                                                                                                                                                                                                                                                          |   |                |                                 |   |                |                                                 |   |                |                                                 |   |                |                     |   |                |                                                                  |   |                |                                              |   |                |                                                              |   |                |                                  |   |                |                   |

|    |                                                                                                        |                                                                                      |                                                                                                                                                                                                                                                                                                                                                                                                                                                                                                                                                                                                                                                                                                                                                                                                                                                                                                                                                                                                                                                                                                                                                                                                                                                                                                                                                                                                                                                                                                                                                                                                                                                                                                                                                                                                                                                                                                                                |   |                         |                                                                       |   |                         |        |   |                         |                 |   |                         |                                           |   |                         |                                                                                      |   |                         |                                                           |   |                         |                 |   |                         |                 |   |                         |                     |   |                         |                                                 |    |                          |                              |    |                          |                                     |    |                          |                                   |    |                          |                   |    |                          |                               |    |                          |                                               |    |                          |                           |    |                          |                   |
|----|--------------------------------------------------------------------------------------------------------|--------------------------------------------------------------------------------------|--------------------------------------------------------------------------------------------------------------------------------------------------------------------------------------------------------------------------------------------------------------------------------------------------------------------------------------------------------------------------------------------------------------------------------------------------------------------------------------------------------------------------------------------------------------------------------------------------------------------------------------------------------------------------------------------------------------------------------------------------------------------------------------------------------------------------------------------------------------------------------------------------------------------------------------------------------------------------------------------------------------------------------------------------------------------------------------------------------------------------------------------------------------------------------------------------------------------------------------------------------------------------------------------------------------------------------------------------------------------------------------------------------------------------------------------------------------------------------------------------------------------------------------------------------------------------------------------------------------------------------------------------------------------------------------------------------------------------------------------------------------------------------------------------------------------------------------------------------------------------------------------------------------------------------|---|-------------------------|-----------------------------------------------------------------------|---|-------------------------|--------|---|-------------------------|-----------------|---|-------------------------|-------------------------------------------|---|-------------------------|--------------------------------------------------------------------------------------|---|-------------------------|-----------------------------------------------------------|---|-------------------------|-----------------|---|-------------------------|-----------------|---|-------------------------|---------------------|---|-------------------------|-------------------------------------------------|----|--------------------------|------------------------------|----|--------------------------|-------------------------------------|----|--------------------------|-----------------------------------|----|--------------------------|-------------------|----|--------------------------|-------------------------------|----|--------------------------|-----------------------------------------------|----|--------------------------|---------------------------|----|--------------------------|-------------------|
| 77 | pa_ppaclipo_v2_v2_v2<br>Afficher le champ UNIQUEM<br>ENT si :<br>[pa_jumelage_v2] = '1'                | Clinical aspects                                                                     | checkbox<br><table border="1"> <tr> <td>0</td> <td>pa_ppaclipo_v2_v2_v2__0</td> <td>Announcement of cancer diagnosis/genetic predisposition by the doctor</td> </tr> <tr> <td>1</td> <td>pa_ppaclipo_v2_v2_v2__1</td> <td>Cancer</td> </tr> <tr> <td>2</td> <td>pa_ppaclipo_v2_v2_v2__2</td> <td>Genetic testing</td> </tr> <tr> <td>3</td> <td>pa_ppaclipo_v2_v2_v2__3</td> <td>Therapeutic options in the case of cancer</td> </tr> <tr> <td>4</td> <td>pa_ppaclipo_v2_v2_v2__4</td> <td>Ways to reduce risk in carriers of a gene mutation that increases the risk of cancer</td> </tr> <tr> <td>5</td> <td>pa_ppaclipo_v2_v2_v2__5</td> <td>Surgical and reconstructive options in the case of cancer</td> </tr> <tr> <td>6</td> <td>pa_ppaclipo_v2_v2_v2__6</td> <td>Breast implants</td> </tr> <tr> <td>7</td> <td>pa_ppaclipo_v2_v2_v2__7</td> <td>Hormonal issues</td> </tr> <tr> <td>8</td> <td>pa_ppaclipo_v2_v2_v2__8</td> <td>Reproductive issues</td> </tr> <tr> <td>9</td> <td>pa_ppaclipo_v2_v2_v2__9</td> <td>The issues of urinary and erectile dysfunctions</td> </tr> <tr> <td>10</td> <td>pa_ppaclipo_v2_v2_v2__10</td> <td>Fatigue following treatments</td> </tr> <tr> <td>11</td> <td>pa_ppaclipo_v2_v2_v2__11</td> <td>Pain and discomfort after treatment</td> </tr> <tr> <td>12</td> <td>pa_ppaclipo_v2_v2_v2__12</td> <td>Pain and discomfort after surgery</td> </tr> <tr> <td>13</td> <td>pa_ppaclipo_v2_v2_v2__13</td> <td>Possible emotions</td> </tr> <tr> <td>14</td> <td>pa_ppaclipo_v2_v2_v2__14</td> <td>Stress and anxiety management</td> </tr> <tr> <td>15</td> <td>pa_ppaclipo_v2_v2_v2__15</td> <td>Impact on physical appearance and self-esteem</td> </tr> <tr> <td>16</td> <td>pa_ppaclipo_v2_v2_v2__16</td> <td>Decision-making processes</td> </tr> <tr> <td>17</td> <td>pa_ppaclipo_v2_v2_v2__17</td> <td>Other information</td> </tr> </table><br>Alignement personnalisé : LV | 0 | pa_ppaclipo_v2_v2_v2__0 | Announcement of cancer diagnosis/genetic predisposition by the doctor | 1 | pa_ppaclipo_v2_v2_v2__1 | Cancer | 2 | pa_ppaclipo_v2_v2_v2__2 | Genetic testing | 3 | pa_ppaclipo_v2_v2_v2__3 | Therapeutic options in the case of cancer | 4 | pa_ppaclipo_v2_v2_v2__4 | Ways to reduce risk in carriers of a gene mutation that increases the risk of cancer | 5 | pa_ppaclipo_v2_v2_v2__5 | Surgical and reconstructive options in the case of cancer | 6 | pa_ppaclipo_v2_v2_v2__6 | Breast implants | 7 | pa_ppaclipo_v2_v2_v2__7 | Hormonal issues | 8 | pa_ppaclipo_v2_v2_v2__8 | Reproductive issues | 9 | pa_ppaclipo_v2_v2_v2__9 | The issues of urinary and erectile dysfunctions | 10 | pa_ppaclipo_v2_v2_v2__10 | Fatigue following treatments | 11 | pa_ppaclipo_v2_v2_v2__11 | Pain and discomfort after treatment | 12 | pa_ppaclipo_v2_v2_v2__12 | Pain and discomfort after surgery | 13 | pa_ppaclipo_v2_v2_v2__13 | Possible emotions | 14 | pa_ppaclipo_v2_v2_v2__14 | Stress and anxiety management | 15 | pa_ppaclipo_v2_v2_v2__15 | Impact on physical appearance and self-esteem | 16 | pa_ppaclipo_v2_v2_v2__16 | Decision-making processes | 17 | pa_ppaclipo_v2_v2_v2__17 | Other information |
| 0  | pa_ppaclipo_v2_v2_v2__0                                                                                | Announcement of cancer diagnosis/genetic predisposition by the doctor                |                                                                                                                                                                                                                                                                                                                                                                                                                                                                                                                                                                                                                                                                                                                                                                                                                                                                                                                                                                                                                                                                                                                                                                                                                                                                                                                                                                                                                                                                                                                                                                                                                                                                                                                                                                                                                                                                                                                                |   |                         |                                                                       |   |                         |        |   |                         |                 |   |                         |                                           |   |                         |                                                                                      |   |                         |                                                           |   |                         |                 |   |                         |                 |   |                         |                     |   |                         |                                                 |    |                          |                              |    |                          |                                     |    |                          |                                   |    |                          |                   |    |                          |                               |    |                          |                                               |    |                          |                           |    |                          |                   |
| 1  | pa_ppaclipo_v2_v2_v2__1                                                                                | Cancer                                                                               |                                                                                                                                                                                                                                                                                                                                                                                                                                                                                                                                                                                                                                                                                                                                                                                                                                                                                                                                                                                                                                                                                                                                                                                                                                                                                                                                                                                                                                                                                                                                                                                                                                                                                                                                                                                                                                                                                                                                |   |                         |                                                                       |   |                         |        |   |                         |                 |   |                         |                                           |   |                         |                                                                                      |   |                         |                                                           |   |                         |                 |   |                         |                 |   |                         |                     |   |                         |                                                 |    |                          |                              |    |                          |                                     |    |                          |                                   |    |                          |                   |    |                          |                               |    |                          |                                               |    |                          |                           |    |                          |                   |
| 2  | pa_ppaclipo_v2_v2_v2__2                                                                                | Genetic testing                                                                      |                                                                                                                                                                                                                                                                                                                                                                                                                                                                                                                                                                                                                                                                                                                                                                                                                                                                                                                                                                                                                                                                                                                                                                                                                                                                                                                                                                                                                                                                                                                                                                                                                                                                                                                                                                                                                                                                                                                                |   |                         |                                                                       |   |                         |        |   |                         |                 |   |                         |                                           |   |                         |                                                                                      |   |                         |                                                           |   |                         |                 |   |                         |                 |   |                         |                     |   |                         |                                                 |    |                          |                              |    |                          |                                     |    |                          |                                   |    |                          |                   |    |                          |                               |    |                          |                                               |    |                          |                           |    |                          |                   |
| 3  | pa_ppaclipo_v2_v2_v2__3                                                                                | Therapeutic options in the case of cancer                                            |                                                                                                                                                                                                                                                                                                                                                                                                                                                                                                                                                                                                                                                                                                                                                                                                                                                                                                                                                                                                                                                                                                                                                                                                                                                                                                                                                                                                                                                                                                                                                                                                                                                                                                                                                                                                                                                                                                                                |   |                         |                                                                       |   |                         |        |   |                         |                 |   |                         |                                           |   |                         |                                                                                      |   |                         |                                                           |   |                         |                 |   |                         |                 |   |                         |                     |   |                         |                                                 |    |                          |                              |    |                          |                                     |    |                          |                                   |    |                          |                   |    |                          |                               |    |                          |                                               |    |                          |                           |    |                          |                   |
| 4  | pa_ppaclipo_v2_v2_v2__4                                                                                | Ways to reduce risk in carriers of a gene mutation that increases the risk of cancer |                                                                                                                                                                                                                                                                                                                                                                                                                                                                                                                                                                                                                                                                                                                                                                                                                                                                                                                                                                                                                                                                                                                                                                                                                                                                                                                                                                                                                                                                                                                                                                                                                                                                                                                                                                                                                                                                                                                                |   |                         |                                                                       |   |                         |        |   |                         |                 |   |                         |                                           |   |                         |                                                                                      |   |                         |                                                           |   |                         |                 |   |                         |                 |   |                         |                     |   |                         |                                                 |    |                          |                              |    |                          |                                     |    |                          |                                   |    |                          |                   |    |                          |                               |    |                          |                                               |    |                          |                           |    |                          |                   |
| 5  | pa_ppaclipo_v2_v2_v2__5                                                                                | Surgical and reconstructive options in the case of cancer                            |                                                                                                                                                                                                                                                                                                                                                                                                                                                                                                                                                                                                                                                                                                                                                                                                                                                                                                                                                                                                                                                                                                                                                                                                                                                                                                                                                                                                                                                                                                                                                                                                                                                                                                                                                                                                                                                                                                                                |   |                         |                                                                       |   |                         |        |   |                         |                 |   |                         |                                           |   |                         |                                                                                      |   |                         |                                                           |   |                         |                 |   |                         |                 |   |                         |                     |   |                         |                                                 |    |                          |                              |    |                          |                                     |    |                          |                                   |    |                          |                   |    |                          |                               |    |                          |                                               |    |                          |                           |    |                          |                   |
| 6  | pa_ppaclipo_v2_v2_v2__6                                                                                | Breast implants                                                                      |                                                                                                                                                                                                                                                                                                                                                                                                                                                                                                                                                                                                                                                                                                                                                                                                                                                                                                                                                                                                                                                                                                                                                                                                                                                                                                                                                                                                                                                                                                                                                                                                                                                                                                                                                                                                                                                                                                                                |   |                         |                                                                       |   |                         |        |   |                         |                 |   |                         |                                           |   |                         |                                                                                      |   |                         |                                                           |   |                         |                 |   |                         |                 |   |                         |                     |   |                         |                                                 |    |                          |                              |    |                          |                                     |    |                          |                                   |    |                          |                   |    |                          |                               |    |                          |                                               |    |                          |                           |    |                          |                   |
| 7  | pa_ppaclipo_v2_v2_v2__7                                                                                | Hormonal issues                                                                      |                                                                                                                                                                                                                                                                                                                                                                                                                                                                                                                                                                                                                                                                                                                                                                                                                                                                                                                                                                                                                                                                                                                                                                                                                                                                                                                                                                                                                                                                                                                                                                                                                                                                                                                                                                                                                                                                                                                                |   |                         |                                                                       |   |                         |        |   |                         |                 |   |                         |                                           |   |                         |                                                                                      |   |                         |                                                           |   |                         |                 |   |                         |                 |   |                         |                     |   |                         |                                                 |    |                          |                              |    |                          |                                     |    |                          |                                   |    |                          |                   |    |                          |                               |    |                          |                                               |    |                          |                           |    |                          |                   |
| 8  | pa_ppaclipo_v2_v2_v2__8                                                                                | Reproductive issues                                                                  |                                                                                                                                                                                                                                                                                                                                                                                                                                                                                                                                                                                                                                                                                                                                                                                                                                                                                                                                                                                                                                                                                                                                                                                                                                                                                                                                                                                                                                                                                                                                                                                                                                                                                                                                                                                                                                                                                                                                |   |                         |                                                                       |   |                         |        |   |                         |                 |   |                         |                                           |   |                         |                                                                                      |   |                         |                                                           |   |                         |                 |   |                         |                 |   |                         |                     |   |                         |                                                 |    |                          |                              |    |                          |                                     |    |                          |                                   |    |                          |                   |    |                          |                               |    |                          |                                               |    |                          |                           |    |                          |                   |
| 9  | pa_ppaclipo_v2_v2_v2__9                                                                                | The issues of urinary and erectile dysfunctions                                      |                                                                                                                                                                                                                                                                                                                                                                                                                                                                                                                                                                                                                                                                                                                                                                                                                                                                                                                                                                                                                                                                                                                                                                                                                                                                                                                                                                                                                                                                                                                                                                                                                                                                                                                                                                                                                                                                                                                                |   |                         |                                                                       |   |                         |        |   |                         |                 |   |                         |                                           |   |                         |                                                                                      |   |                         |                                                           |   |                         |                 |   |                         |                 |   |                         |                     |   |                         |                                                 |    |                          |                              |    |                          |                                     |    |                          |                                   |    |                          |                   |    |                          |                               |    |                          |                                               |    |                          |                           |    |                          |                   |
| 10 | pa_ppaclipo_v2_v2_v2__10                                                                               | Fatigue following treatments                                                         |                                                                                                                                                                                                                                                                                                                                                                                                                                                                                                                                                                                                                                                                                                                                                                                                                                                                                                                                                                                                                                                                                                                                                                                                                                                                                                                                                                                                                                                                                                                                                                                                                                                                                                                                                                                                                                                                                                                                |   |                         |                                                                       |   |                         |        |   |                         |                 |   |                         |                                           |   |                         |                                                                                      |   |                         |                                                           |   |                         |                 |   |                         |                 |   |                         |                     |   |                         |                                                 |    |                          |                              |    |                          |                                     |    |                          |                                   |    |                          |                   |    |                          |                               |    |                          |                                               |    |                          |                           |    |                          |                   |
| 11 | pa_ppaclipo_v2_v2_v2__11                                                                               | Pain and discomfort after treatment                                                  |                                                                                                                                                                                                                                                                                                                                                                                                                                                                                                                                                                                                                                                                                                                                                                                                                                                                                                                                                                                                                                                                                                                                                                                                                                                                                                                                                                                                                                                                                                                                                                                                                                                                                                                                                                                                                                                                                                                                |   |                         |                                                                       |   |                         |        |   |                         |                 |   |                         |                                           |   |                         |                                                                                      |   |                         |                                                           |   |                         |                 |   |                         |                 |   |                         |                     |   |                         |                                                 |    |                          |                              |    |                          |                                     |    |                          |                                   |    |                          |                   |    |                          |                               |    |                          |                                               |    |                          |                           |    |                          |                   |
| 12 | pa_ppaclipo_v2_v2_v2__12                                                                               | Pain and discomfort after surgery                                                    |                                                                                                                                                                                                                                                                                                                                                                                                                                                                                                                                                                                                                                                                                                                                                                                                                                                                                                                                                                                                                                                                                                                                                                                                                                                                                                                                                                                                                                                                                                                                                                                                                                                                                                                                                                                                                                                                                                                                |   |                         |                                                                       |   |                         |        |   |                         |                 |   |                         |                                           |   |                         |                                                                                      |   |                         |                                                           |   |                         |                 |   |                         |                 |   |                         |                     |   |                         |                                                 |    |                          |                              |    |                          |                                     |    |                          |                                   |    |                          |                   |    |                          |                               |    |                          |                                               |    |                          |                           |    |                          |                   |
| 13 | pa_ppaclipo_v2_v2_v2__13                                                                               | Possible emotions                                                                    |                                                                                                                                                                                                                                                                                                                                                                                                                                                                                                                                                                                                                                                                                                                                                                                                                                                                                                                                                                                                                                                                                                                                                                                                                                                                                                                                                                                                                                                                                                                                                                                                                                                                                                                                                                                                                                                                                                                                |   |                         |                                                                       |   |                         |        |   |                         |                 |   |                         |                                           |   |                         |                                                                                      |   |                         |                                                           |   |                         |                 |   |                         |                 |   |                         |                     |   |                         |                                                 |    |                          |                              |    |                          |                                     |    |                          |                                   |    |                          |                   |    |                          |                               |    |                          |                                               |    |                          |                           |    |                          |                   |
| 14 | pa_ppaclipo_v2_v2_v2__14                                                                               | Stress and anxiety management                                                        |                                                                                                                                                                                                                                                                                                                                                                                                                                                                                                                                                                                                                                                                                                                                                                                                                                                                                                                                                                                                                                                                                                                                                                                                                                                                                                                                                                                                                                                                                                                                                                                                                                                                                                                                                                                                                                                                                                                                |   |                         |                                                                       |   |                         |        |   |                         |                 |   |                         |                                           |   |                         |                                                                                      |   |                         |                                                           |   |                         |                 |   |                         |                 |   |                         |                     |   |                         |                                                 |    |                          |                              |    |                          |                                     |    |                          |                                   |    |                          |                   |    |                          |                               |    |                          |                                               |    |                          |                           |    |                          |                   |
| 15 | pa_ppaclipo_v2_v2_v2__15                                                                               | Impact on physical appearance and self-esteem                                        |                                                                                                                                                                                                                                                                                                                                                                                                                                                                                                                                                                                                                                                                                                                                                                                                                                                                                                                                                                                                                                                                                                                                                                                                                                                                                                                                                                                                                                                                                                                                                                                                                                                                                                                                                                                                                                                                                                                                |   |                         |                                                                       |   |                         |        |   |                         |                 |   |                         |                                           |   |                         |                                                                                      |   |                         |                                                           |   |                         |                 |   |                         |                 |   |                         |                     |   |                         |                                                 |    |                          |                              |    |                          |                                     |    |                          |                                   |    |                          |                   |    |                          |                               |    |                          |                                               |    |                          |                           |    |                          |                   |
| 16 | pa_ppaclipo_v2_v2_v2__16                                                                               | Decision-making processes                                                            |                                                                                                                                                                                                                                                                                                                                                                                                                                                                                                                                                                                                                                                                                                                                                                                                                                                                                                                                                                                                                                                                                                                                                                                                                                                                                                                                                                                                                                                                                                                                                                                                                                                                                                                                                                                                                                                                                                                                |   |                         |                                                                       |   |                         |        |   |                         |                 |   |                         |                                           |   |                         |                                                                                      |   |                         |                                                           |   |                         |                 |   |                         |                 |   |                         |                     |   |                         |                                                 |    |                          |                              |    |                          |                                     |    |                          |                                   |    |                          |                   |    |                          |                               |    |                          |                                               |    |                          |                           |    |                          |                   |
| 17 | pa_ppaclipo_v2_v2_v2__17                                                                               | Other information                                                                    |                                                                                                                                                                                                                                                                                                                                                                                                                                                                                                                                                                                                                                                                                                                                                                                                                                                                                                                                                                                                                                                                                                                                                                                                                                                                                                                                                                                                                                                                                                                                                                                                                                                                                                                                                                                                                                                                                                                                |   |                         |                                                                       |   |                         |        |   |                         |                 |   |                         |                                           |   |                         |                                                                                      |   |                         |                                                           |   |                         |                 |   |                         |                 |   |                         |                     |   |                         |                                                 |    |                          |                              |    |                          |                                     |    |                          |                                   |    |                          |                   |    |                          |                               |    |                          |                                               |    |                          |                           |    |                          |                   |
| 78 | pa_ppaclipoautre_v2_v2_v2<br>Afficher le champ UNIQUEM<br>ENT si :<br>[pa_ppaclipo_v2_v2_v2(17)] = '1' | If other information, please specify which one:                                      | text<br>Alignement personnalisé : LV                                                                                                                                                                                                                                                                                                                                                                                                                                                                                                                                                                                                                                                                                                                                                                                                                                                                                                                                                                                                                                                                                                                                                                                                                                                                                                                                                                                                                                                                                                                                                                                                                                                                                                                                                                                                                                                                                           |   |                         |                                                                       |   |                         |        |   |                         |                 |   |                         |                                           |   |                         |                                                                                      |   |                         |                                                           |   |                         |                 |   |                         |                 |   |                         |                     |   |                         |                                                 |    |                          |                              |    |                          |                                     |    |                          |                                   |    |                          |                   |    |                          |                               |    |                          |                                               |    |                          |                           |    |                          |                   |

|    |                                                                                                |                                                             |                                                                                                                                                                                                                                                                                                                                                                                                                                                                                                                                                                                                                                                                                                                                                                                                                                                                                                                                                                                                                                                                                                                                                                                                                                                                                                                                                                                       |   |                |                          |   |                |                               |   |                |                             |   |                |                   |   |                |                          |   |                |                                        |   |                |                                                |   |                |                        |   |                |                           |    |                 |                                   |    |                 |                                            |    |                 |                                                             |    |                 |                                        |    |                 |                   |
|----|------------------------------------------------------------------------------------------------|-------------------------------------------------------------|---------------------------------------------------------------------------------------------------------------------------------------------------------------------------------------------------------------------------------------------------------------------------------------------------------------------------------------------------------------------------------------------------------------------------------------------------------------------------------------------------------------------------------------------------------------------------------------------------------------------------------------------------------------------------------------------------------------------------------------------------------------------------------------------------------------------------------------------------------------------------------------------------------------------------------------------------------------------------------------------------------------------------------------------------------------------------------------------------------------------------------------------------------------------------------------------------------------------------------------------------------------------------------------------------------------------------------------------------------------------------------------|---|----------------|--------------------------|---|----------------|-------------------------------|---|----------------|-----------------------------|---|----------------|-------------------|---|----------------|--------------------------|---|----------------|----------------------------------------|---|----------------|------------------------------------------------|---|----------------|------------------------|---|----------------|---------------------------|----|-----------------|-----------------------------------|----|-----------------|--------------------------------------------|----|-----------------|-------------------------------------------------------------|----|-----------------|----------------------------------------|----|-----------------|-------------------|
| 79 | pa_quopo_v2<br>Afficher le champ UNIQUEM<br>ENT si :<br>[pa_jumelage_v2] = '1'                 | Consequences on daily life                                  | checkbox <table border="1" data-bbox="1023 107 1495 943"> <tr> <td>1</td> <td>pa_quopo_v2__1</td> <td>Consequences on children</td> </tr> <tr> <td>2</td> <td>pa_quopo_v2__2</td> <td>Consequences on conjugal life</td> </tr> <tr> <td>3</td> <td>pa_quopo_v2__3</td> <td>Consequences on sexual life</td> </tr> <tr> <td>4</td> <td>pa_quopo_v2__4</td> <td>Returning to work</td> </tr> <tr> <td>5</td> <td>pa_quopo_v2__5</td> <td>The return to daily life</td> </tr> <tr> <td>6</td> <td>pa_quopo_v2__6</td> <td>The consequences on the spiritual life</td> </tr> <tr> <td>7</td> <td>pa_quopo_v2__7</td> <td>How to announce a diagnosis to your loved ones</td> </tr> <tr> <td>8</td> <td>pa_quopo_v2__8</td> <td>Financial implications</td> </tr> <tr> <td>9</td> <td>pa_quopo_v2__9</td> <td>Consequences on insurance</td> </tr> <tr> <td>10</td> <td>pa_quopo_v2__10</td> <td>Consequences on professional life</td> </tr> <tr> <td>11</td> <td>pa_quopo_v2__11</td> <td>Social perception (the reaction of others)</td> </tr> <tr> <td>12</td> <td>pa_quopo_v2__12</td> <td>Strategies for living the treatments in the best conditions</td> </tr> <tr> <td>13</td> <td>pa_quopo_v2__13</td> <td>How to regain control over the disease</td> </tr> <tr> <td>14</td> <td>pa_quopo_v2__14</td> <td>Other information</td> </tr> </table><br>Alignement personnalisé : LV | 1 | pa_quopo_v2__1 | Consequences on children | 2 | pa_quopo_v2__2 | Consequences on conjugal life | 3 | pa_quopo_v2__3 | Consequences on sexual life | 4 | pa_quopo_v2__4 | Returning to work | 5 | pa_quopo_v2__5 | The return to daily life | 6 | pa_quopo_v2__6 | The consequences on the spiritual life | 7 | pa_quopo_v2__7 | How to announce a diagnosis to your loved ones | 8 | pa_quopo_v2__8 | Financial implications | 9 | pa_quopo_v2__9 | Consequences on insurance | 10 | pa_quopo_v2__10 | Consequences on professional life | 11 | pa_quopo_v2__11 | Social perception (the reaction of others) | 12 | pa_quopo_v2__12 | Strategies for living the treatments in the best conditions | 13 | pa_quopo_v2__13 | How to regain control over the disease | 14 | pa_quopo_v2__14 | Other information |
| 1  | pa_quopo_v2__1                                                                                 | Consequences on children                                    |                                                                                                                                                                                                                                                                                                                                                                                                                                                                                                                                                                                                                                                                                                                                                                                                                                                                                                                                                                                                                                                                                                                                                                                                                                                                                                                                                                                       |   |                |                          |   |                |                               |   |                |                             |   |                |                   |   |                |                          |   |                |                                        |   |                |                                                |   |                |                        |   |                |                           |    |                 |                                   |    |                 |                                            |    |                 |                                                             |    |                 |                                        |    |                 |                   |
| 2  | pa_quopo_v2__2                                                                                 | Consequences on conjugal life                               |                                                                                                                                                                                                                                                                                                                                                                                                                                                                                                                                                                                                                                                                                                                                                                                                                                                                                                                                                                                                                                                                                                                                                                                                                                                                                                                                                                                       |   |                |                          |   |                |                               |   |                |                             |   |                |                   |   |                |                          |   |                |                                        |   |                |                                                |   |                |                        |   |                |                           |    |                 |                                   |    |                 |                                            |    |                 |                                                             |    |                 |                                        |    |                 |                   |
| 3  | pa_quopo_v2__3                                                                                 | Consequences on sexual life                                 |                                                                                                                                                                                                                                                                                                                                                                                                                                                                                                                                                                                                                                                                                                                                                                                                                                                                                                                                                                                                                                                                                                                                                                                                                                                                                                                                                                                       |   |                |                          |   |                |                               |   |                |                             |   |                |                   |   |                |                          |   |                |                                        |   |                |                                                |   |                |                        |   |                |                           |    |                 |                                   |    |                 |                                            |    |                 |                                                             |    |                 |                                        |    |                 |                   |
| 4  | pa_quopo_v2__4                                                                                 | Returning to work                                           |                                                                                                                                                                                                                                                                                                                                                                                                                                                                                                                                                                                                                                                                                                                                                                                                                                                                                                                                                                                                                                                                                                                                                                                                                                                                                                                                                                                       |   |                |                          |   |                |                               |   |                |                             |   |                |                   |   |                |                          |   |                |                                        |   |                |                                                |   |                |                        |   |                |                           |    |                 |                                   |    |                 |                                            |    |                 |                                                             |    |                 |                                        |    |                 |                   |
| 5  | pa_quopo_v2__5                                                                                 | The return to daily life                                    |                                                                                                                                                                                                                                                                                                                                                                                                                                                                                                                                                                                                                                                                                                                                                                                                                                                                                                                                                                                                                                                                                                                                                                                                                                                                                                                                                                                       |   |                |                          |   |                |                               |   |                |                             |   |                |                   |   |                |                          |   |                |                                        |   |                |                                                |   |                |                        |   |                |                           |    |                 |                                   |    |                 |                                            |    |                 |                                                             |    |                 |                                        |    |                 |                   |
| 6  | pa_quopo_v2__6                                                                                 | The consequences on the spiritual life                      |                                                                                                                                                                                                                                                                                                                                                                                                                                                                                                                                                                                                                                                                                                                                                                                                                                                                                                                                                                                                                                                                                                                                                                                                                                                                                                                                                                                       |   |                |                          |   |                |                               |   |                |                             |   |                |                   |   |                |                          |   |                |                                        |   |                |                                                |   |                |                        |   |                |                           |    |                 |                                   |    |                 |                                            |    |                 |                                                             |    |                 |                                        |    |                 |                   |
| 7  | pa_quopo_v2__7                                                                                 | How to announce a diagnosis to your loved ones              |                                                                                                                                                                                                                                                                                                                                                                                                                                                                                                                                                                                                                                                                                                                                                                                                                                                                                                                                                                                                                                                                                                                                                                                                                                                                                                                                                                                       |   |                |                          |   |                |                               |   |                |                             |   |                |                   |   |                |                          |   |                |                                        |   |                |                                                |   |                |                        |   |                |                           |    |                 |                                   |    |                 |                                            |    |                 |                                                             |    |                 |                                        |    |                 |                   |
| 8  | pa_quopo_v2__8                                                                                 | Financial implications                                      |                                                                                                                                                                                                                                                                                                                                                                                                                                                                                                                                                                                                                                                                                                                                                                                                                                                                                                                                                                                                                                                                                                                                                                                                                                                                                                                                                                                       |   |                |                          |   |                |                               |   |                |                             |   |                |                   |   |                |                          |   |                |                                        |   |                |                                                |   |                |                        |   |                |                           |    |                 |                                   |    |                 |                                            |    |                 |                                                             |    |                 |                                        |    |                 |                   |
| 9  | pa_quopo_v2__9                                                                                 | Consequences on insurance                                   |                                                                                                                                                                                                                                                                                                                                                                                                                                                                                                                                                                                                                                                                                                                                                                                                                                                                                                                                                                                                                                                                                                                                                                                                                                                                                                                                                                                       |   |                |                          |   |                |                               |   |                |                             |   |                |                   |   |                |                          |   |                |                                        |   |                |                                                |   |                |                        |   |                |                           |    |                 |                                   |    |                 |                                            |    |                 |                                                             |    |                 |                                        |    |                 |                   |
| 10 | pa_quopo_v2__10                                                                                | Consequences on professional life                           |                                                                                                                                                                                                                                                                                                                                                                                                                                                                                                                                                                                                                                                                                                                                                                                                                                                                                                                                                                                                                                                                                                                                                                                                                                                                                                                                                                                       |   |                |                          |   |                |                               |   |                |                             |   |                |                   |   |                |                          |   |                |                                        |   |                |                                                |   |                |                        |   |                |                           |    |                 |                                   |    |                 |                                            |    |                 |                                                             |    |                 |                                        |    |                 |                   |
| 11 | pa_quopo_v2__11                                                                                | Social perception (the reaction of others)                  |                                                                                                                                                                                                                                                                                                                                                                                                                                                                                                                                                                                                                                                                                                                                                                                                                                                                                                                                                                                                                                                                                                                                                                                                                                                                                                                                                                                       |   |                |                          |   |                |                               |   |                |                             |   |                |                   |   |                |                          |   |                |                                        |   |                |                                                |   |                |                        |   |                |                           |    |                 |                                   |    |                 |                                            |    |                 |                                                             |    |                 |                                        |    |                 |                   |
| 12 | pa_quopo_v2__12                                                                                | Strategies for living the treatments in the best conditions |                                                                                                                                                                                                                                                                                                                                                                                                                                                                                                                                                                                                                                                                                                                                                                                                                                                                                                                                                                                                                                                                                                                                                                                                                                                                                                                                                                                       |   |                |                          |   |                |                               |   |                |                             |   |                |                   |   |                |                          |   |                |                                        |   |                |                                                |   |                |                        |   |                |                           |    |                 |                                   |    |                 |                                            |    |                 |                                                             |    |                 |                                        |    |                 |                   |
| 13 | pa_quopo_v2__13                                                                                | How to regain control over the disease                      |                                                                                                                                                                                                                                                                                                                                                                                                                                                                                                                                                                                                                                                                                                                                                                                                                                                                                                                                                                                                                                                                                                                                                                                                                                                                                                                                                                                       |   |                |                          |   |                |                               |   |                |                             |   |                |                   |   |                |                          |   |                |                                        |   |                |                                                |   |                |                        |   |                |                           |    |                 |                                   |    |                 |                                            |    |                 |                                                             |    |                 |                                        |    |                 |                   |
| 14 | pa_quopo_v2__14                                                                                | Other information                                           |                                                                                                                                                                                                                                                                                                                                                                                                                                                                                                                                                                                                                                                                                                                                                                                                                                                                                                                                                                                                                                                                                                                                                                                                                                                                                                                                                                                       |   |                |                          |   |                |                               |   |                |                             |   |                |                   |   |                |                          |   |                |                                        |   |                |                                                |   |                |                        |   |                |                           |    |                 |                                   |    |                 |                                            |    |                 |                                                             |    |                 |                                        |    |                 |                   |
| 80 | pa_ppaquopopautre_v2_v2_v2<br>Afficher le champ UNIQUEM<br>ENT si :<br>[pa_quopo_v2(14)] = '1' | If other information, please specify which one:             | text<br>Alignement personnalisé : LV                                                                                                                                                                                                                                                                                                                                                                                                                                                                                                                                                                                                                                                                                                                                                                                                                                                                                                                                                                                                                                                                                                                                                                                                                                                                                                                                                  |   |                |                          |   |                |                               |   |                |                             |   |                |                   |   |                |                          |   |                |                                        |   |                |                                                |   |                |                        |   |                |                           |    |                 |                                   |    |                 |                                            |    |                 |                                                             |    |                 |                                        |    |                 |                   |

|                                                                                                       |                                                                                                                     |                                                                                                        |                                                                                                                                                                                                                                                                                                                                                                                                                                                                                                                                                                                                                                                                                                                                                                                                                                                                                                                                                                                                                                                                                                                                                                                                                                                                                                                                                                                                                                                                                                                                                                                                                                                                                                                                                                                                                                                                                                                  |   |                   |                    |                  |                   |                  |   |                      |                     |                  |                   |                                                                                |   |                   |                                                                    |   |                   |                                                                                          |   |                   |                                 |   |                   |                                                |   |                   |                                               |   |                   |                                                    |    |                    |                                               |    |                    |                                              |    |                    |                                                                                   |    |                    |                                                             |    |                    |                          |    |                    |                    |    |                    |                                                                                        |
|-------------------------------------------------------------------------------------------------------|---------------------------------------------------------------------------------------------------------------------|--------------------------------------------------------------------------------------------------------|------------------------------------------------------------------------------------------------------------------------------------------------------------------------------------------------------------------------------------------------------------------------------------------------------------------------------------------------------------------------------------------------------------------------------------------------------------------------------------------------------------------------------------------------------------------------------------------------------------------------------------------------------------------------------------------------------------------------------------------------------------------------------------------------------------------------------------------------------------------------------------------------------------------------------------------------------------------------------------------------------------------------------------------------------------------------------------------------------------------------------------------------------------------------------------------------------------------------------------------------------------------------------------------------------------------------------------------------------------------------------------------------------------------------------------------------------------------------------------------------------------------------------------------------------------------------------------------------------------------------------------------------------------------------------------------------------------------------------------------------------------------------------------------------------------------------------------------------------------------------------------------------------------------|---|-------------------|--------------------|------------------|-------------------|------------------|---|----------------------|---------------------|------------------|-------------------|--------------------------------------------------------------------------------|---|-------------------|--------------------------------------------------------------------|---|-------------------|------------------------------------------------------------------------------------------|---|-------------------|---------------------------------|---|-------------------|------------------------------------------------|---|-------------------|-----------------------------------------------|---|-------------------|----------------------------------------------------|----|--------------------|-----------------------------------------------|----|--------------------|----------------------------------------------|----|--------------------|-----------------------------------------------------------------------------------|----|--------------------|-------------------------------------------------------------|----|--------------------|--------------------------|----|--------------------|--------------------|----|--------------------|----------------------------------------------------------------------------------------|
| 81                                                                                                    | <p>pa_contripo_v2</p> <p>Afficher le champ UNIQUEMENT si :<br/>[pa_jumelage_v2] = '1' or [pa_jumelage_v2] = '2'</p> | <p>In your opinion, what could be/could have been the contribution of the patient advisor?</p>         | <p>checkbox</p> <table border="1"> <tr><td>0</td><td>pa_contripo_v2__0</td><td>Giving information</td></tr> <tr><td>1</td><td>pa_contripo_v2__1</td><td>Giving support</td></tr> <tr><td>2</td><td>pa_contripo_v2__2</td><td>Sharing experiences</td></tr> <tr><td>3</td><td>pa_contripo_v2__3</td><td>Facilitate communication between the health care team and the patient advisor.</td></tr> <tr><td>4</td><td>pa_contripo_v2__4</td><td>Helping to bring the patient's perspective to the health care team</td></tr> <tr><td>5</td><td>pa_contripo_v2__5</td><td>Improve understanding of information shared between the patient and the health care team</td></tr> <tr><td>6</td><td>pa_contripo_v2__6</td><td>Helping to remember information</td></tr> <tr><td>7</td><td>pa_contripo_v2__7</td><td>Preparing the patient for medical appointments</td></tr> <tr><td>8</td><td>pa_contripo_v2__8</td><td>Accompanying patients to medical appointments</td></tr> <tr><td>9</td><td>pa_contripo_v2__9</td><td>Helping the patient participate in decision making</td></tr> <tr><td>10</td><td>pa_contripo_v2__10</td><td>Bringing a new perspective to decision making</td></tr> <tr><td>11</td><td>pa_contripo_v2__11</td><td>Referring patients to a variety of resources</td></tr> <tr><td>12</td><td>pa_contripo_v2__12</td><td>Help develop a trusting relationship between the patient and the health care team</td></tr> <tr><td>13</td><td>pa_contripo_v2__13</td><td>Helping the patient become a partner in his or her own care</td></tr> <tr><td>14</td><td>pa_contripo_v2__14</td><td>Listening to the patient</td></tr> <tr><td>15</td><td>pa_contripo_v2__15</td><td>Other contribution</td></tr> <tr><td>16</td><td>pa_contripo_v2__16</td><td>No, the patient advisor has no particular contribution to make to the care trajectory.</td></tr> </table> <p>Alignement personnalisé : LV</p> | 0 | pa_contripo_v2__0 | Giving information | 1                | pa_contripo_v2__1 | Giving support   | 2 | pa_contripo_v2__2    | Sharing experiences | 3                | pa_contripo_v2__3 | Facilitate communication between the health care team and the patient advisor. | 4 | pa_contripo_v2__4 | Helping to bring the patient's perspective to the health care team | 5 | pa_contripo_v2__5 | Improve understanding of information shared between the patient and the health care team | 6 | pa_contripo_v2__6 | Helping to remember information | 7 | pa_contripo_v2__7 | Preparing the patient for medical appointments | 8 | pa_contripo_v2__8 | Accompanying patients to medical appointments | 9 | pa_contripo_v2__9 | Helping the patient participate in decision making | 10 | pa_contripo_v2__10 | Bringing a new perspective to decision making | 11 | pa_contripo_v2__11 | Referring patients to a variety of resources | 12 | pa_contripo_v2__12 | Help develop a trusting relationship between the patient and the health care team | 13 | pa_contripo_v2__13 | Helping the patient become a partner in his or her own care | 14 | pa_contripo_v2__14 | Listening to the patient | 15 | pa_contripo_v2__15 | Other contribution | 16 | pa_contripo_v2__16 | No, the patient advisor has no particular contribution to make to the care trajectory. |
| 0                                                                                                     | pa_contripo_v2__0                                                                                                   | Giving information                                                                                     |                                                                                                                                                                                                                                                                                                                                                                                                                                                                                                                                                                                                                                                                                                                                                                                                                                                                                                                                                                                                                                                                                                                                                                                                                                                                                                                                                                                                                                                                                                                                                                                                                                                                                                                                                                                                                                                                                                                  |   |                   |                    |                  |                   |                  |   |                      |                     |                  |                   |                                                                                |   |                   |                                                                    |   |                   |                                                                                          |   |                   |                                 |   |                   |                                                |   |                   |                                               |   |                   |                                                    |    |                    |                                               |    |                    |                                              |    |                    |                                                                                   |    |                    |                                                             |    |                    |                          |    |                    |                    |    |                    |                                                                                        |
| 1                                                                                                     | pa_contripo_v2__1                                                                                                   | Giving support                                                                                         |                                                                                                                                                                                                                                                                                                                                                                                                                                                                                                                                                                                                                                                                                                                                                                                                                                                                                                                                                                                                                                                                                                                                                                                                                                                                                                                                                                                                                                                                                                                                                                                                                                                                                                                                                                                                                                                                                                                  |   |                   |                    |                  |                   |                  |   |                      |                     |                  |                   |                                                                                |   |                   |                                                                    |   |                   |                                                                                          |   |                   |                                 |   |                   |                                                |   |                   |                                               |   |                   |                                                    |    |                    |                                               |    |                    |                                              |    |                    |                                                                                   |    |                    |                                                             |    |                    |                          |    |                    |                    |    |                    |                                                                                        |
| 2                                                                                                     | pa_contripo_v2__2                                                                                                   | Sharing experiences                                                                                    |                                                                                                                                                                                                                                                                                                                                                                                                                                                                                                                                                                                                                                                                                                                                                                                                                                                                                                                                                                                                                                                                                                                                                                                                                                                                                                                                                                                                                                                                                                                                                                                                                                                                                                                                                                                                                                                                                                                  |   |                   |                    |                  |                   |                  |   |                      |                     |                  |                   |                                                                                |   |                   |                                                                    |   |                   |                                                                                          |   |                   |                                 |   |                   |                                                |   |                   |                                               |   |                   |                                                    |    |                    |                                               |    |                    |                                              |    |                    |                                                                                   |    |                    |                                                             |    |                    |                          |    |                    |                    |    |                    |                                                                                        |
| 3                                                                                                     | pa_contripo_v2__3                                                                                                   | Facilitate communication between the health care team and the patient advisor.                         |                                                                                                                                                                                                                                                                                                                                                                                                                                                                                                                                                                                                                                                                                                                                                                                                                                                                                                                                                                                                                                                                                                                                                                                                                                                                                                                                                                                                                                                                                                                                                                                                                                                                                                                                                                                                                                                                                                                  |   |                   |                    |                  |                   |                  |   |                      |                     |                  |                   |                                                                                |   |                   |                                                                    |   |                   |                                                                                          |   |                   |                                 |   |                   |                                                |   |                   |                                               |   |                   |                                                    |    |                    |                                               |    |                    |                                              |    |                    |                                                                                   |    |                    |                                                             |    |                    |                          |    |                    |                    |    |                    |                                                                                        |
| 4                                                                                                     | pa_contripo_v2__4                                                                                                   | Helping to bring the patient's perspective to the health care team                                     |                                                                                                                                                                                                                                                                                                                                                                                                                                                                                                                                                                                                                                                                                                                                                                                                                                                                                                                                                                                                                                                                                                                                                                                                                                                                                                                                                                                                                                                                                                                                                                                                                                                                                                                                                                                                                                                                                                                  |   |                   |                    |                  |                   |                  |   |                      |                     |                  |                   |                                                                                |   |                   |                                                                    |   |                   |                                                                                          |   |                   |                                 |   |                   |                                                |   |                   |                                               |   |                   |                                                    |    |                    |                                               |    |                    |                                              |    |                    |                                                                                   |    |                    |                                                             |    |                    |                          |    |                    |                    |    |                    |                                                                                        |
| 5                                                                                                     | pa_contripo_v2__5                                                                                                   | Improve understanding of information shared between the patient and the health care team               |                                                                                                                                                                                                                                                                                                                                                                                                                                                                                                                                                                                                                                                                                                                                                                                                                                                                                                                                                                                                                                                                                                                                                                                                                                                                                                                                                                                                                                                                                                                                                                                                                                                                                                                                                                                                                                                                                                                  |   |                   |                    |                  |                   |                  |   |                      |                     |                  |                   |                                                                                |   |                   |                                                                    |   |                   |                                                                                          |   |                   |                                 |   |                   |                                                |   |                   |                                               |   |                   |                                                    |    |                    |                                               |    |                    |                                              |    |                    |                                                                                   |    |                    |                                                             |    |                    |                          |    |                    |                    |    |                    |                                                                                        |
| 6                                                                                                     | pa_contripo_v2__6                                                                                                   | Helping to remember information                                                                        |                                                                                                                                                                                                                                                                                                                                                                                                                                                                                                                                                                                                                                                                                                                                                                                                                                                                                                                                                                                                                                                                                                                                                                                                                                                                                                                                                                                                                                                                                                                                                                                                                                                                                                                                                                                                                                                                                                                  |   |                   |                    |                  |                   |                  |   |                      |                     |                  |                   |                                                                                |   |                   |                                                                    |   |                   |                                                                                          |   |                   |                                 |   |                   |                                                |   |                   |                                               |   |                   |                                                    |    |                    |                                               |    |                    |                                              |    |                    |                                                                                   |    |                    |                                                             |    |                    |                          |    |                    |                    |    |                    |                                                                                        |
| 7                                                                                                     | pa_contripo_v2__7                                                                                                   | Preparing the patient for medical appointments                                                         |                                                                                                                                                                                                                                                                                                                                                                                                                                                                                                                                                                                                                                                                                                                                                                                                                                                                                                                                                                                                                                                                                                                                                                                                                                                                                                                                                                                                                                                                                                                                                                                                                                                                                                                                                                                                                                                                                                                  |   |                   |                    |                  |                   |                  |   |                      |                     |                  |                   |                                                                                |   |                   |                                                                    |   |                   |                                                                                          |   |                   |                                 |   |                   |                                                |   |                   |                                               |   |                   |                                                    |    |                    |                                               |    |                    |                                              |    |                    |                                                                                   |    |                    |                                                             |    |                    |                          |    |                    |                    |    |                    |                                                                                        |
| 8                                                                                                     | pa_contripo_v2__8                                                                                                   | Accompanying patients to medical appointments                                                          |                                                                                                                                                                                                                                                                                                                                                                                                                                                                                                                                                                                                                                                                                                                                                                                                                                                                                                                                                                                                                                                                                                                                                                                                                                                                                                                                                                                                                                                                                                                                                                                                                                                                                                                                                                                                                                                                                                                  |   |                   |                    |                  |                   |                  |   |                      |                     |                  |                   |                                                                                |   |                   |                                                                    |   |                   |                                                                                          |   |                   |                                 |   |                   |                                                |   |                   |                                               |   |                   |                                                    |    |                    |                                               |    |                    |                                              |    |                    |                                                                                   |    |                    |                                                             |    |                    |                          |    |                    |                    |    |                    |                                                                                        |
| 9                                                                                                     | pa_contripo_v2__9                                                                                                   | Helping the patient participate in decision making                                                     |                                                                                                                                                                                                                                                                                                                                                                                                                                                                                                                                                                                                                                                                                                                                                                                                                                                                                                                                                                                                                                                                                                                                                                                                                                                                                                                                                                                                                                                                                                                                                                                                                                                                                                                                                                                                                                                                                                                  |   |                   |                    |                  |                   |                  |   |                      |                     |                  |                   |                                                                                |   |                   |                                                                    |   |                   |                                                                                          |   |                   |                                 |   |                   |                                                |   |                   |                                               |   |                   |                                                    |    |                    |                                               |    |                    |                                              |    |                    |                                                                                   |    |                    |                                                             |    |                    |                          |    |                    |                    |    |                    |                                                                                        |
| 10                                                                                                    | pa_contripo_v2__10                                                                                                  | Bringing a new perspective to decision making                                                          |                                                                                                                                                                                                                                                                                                                                                                                                                                                                                                                                                                                                                                                                                                                                                                                                                                                                                                                                                                                                                                                                                                                                                                                                                                                                                                                                                                                                                                                                                                                                                                                                                                                                                                                                                                                                                                                                                                                  |   |                   |                    |                  |                   |                  |   |                      |                     |                  |                   |                                                                                |   |                   |                                                                    |   |                   |                                                                                          |   |                   |                                 |   |                   |                                                |   |                   |                                               |   |                   |                                                    |    |                    |                                               |    |                    |                                              |    |                    |                                                                                   |    |                    |                                                             |    |                    |                          |    |                    |                    |    |                    |                                                                                        |
| 11                                                                                                    | pa_contripo_v2__11                                                                                                  | Referring patients to a variety of resources                                                           |                                                                                                                                                                                                                                                                                                                                                                                                                                                                                                                                                                                                                                                                                                                                                                                                                                                                                                                                                                                                                                                                                                                                                                                                                                                                                                                                                                                                                                                                                                                                                                                                                                                                                                                                                                                                                                                                                                                  |   |                   |                    |                  |                   |                  |   |                      |                     |                  |                   |                                                                                |   |                   |                                                                    |   |                   |                                                                                          |   |                   |                                 |   |                   |                                                |   |                   |                                               |   |                   |                                                    |    |                    |                                               |    |                    |                                              |    |                    |                                                                                   |    |                    |                                                             |    |                    |                          |    |                    |                    |    |                    |                                                                                        |
| 12                                                                                                    | pa_contripo_v2__12                                                                                                  | Help develop a trusting relationship between the patient and the health care team                      |                                                                                                                                                                                                                                                                                                                                                                                                                                                                                                                                                                                                                                                                                                                                                                                                                                                                                                                                                                                                                                                                                                                                                                                                                                                                                                                                                                                                                                                                                                                                                                                                                                                                                                                                                                                                                                                                                                                  |   |                   |                    |                  |                   |                  |   |                      |                     |                  |                   |                                                                                |   |                   |                                                                    |   |                   |                                                                                          |   |                   |                                 |   |                   |                                                |   |                   |                                               |   |                   |                                                    |    |                    |                                               |    |                    |                                              |    |                    |                                                                                   |    |                    |                                                             |    |                    |                          |    |                    |                    |    |                    |                                                                                        |
| 13                                                                                                    | pa_contripo_v2__13                                                                                                  | Helping the patient become a partner in his or her own care                                            |                                                                                                                                                                                                                                                                                                                                                                                                                                                                                                                                                                                                                                                                                                                                                                                                                                                                                                                                                                                                                                                                                                                                                                                                                                                                                                                                                                                                                                                                                                                                                                                                                                                                                                                                                                                                                                                                                                                  |   |                   |                    |                  |                   |                  |   |                      |                     |                  |                   |                                                                                |   |                   |                                                                    |   |                   |                                                                                          |   |                   |                                 |   |                   |                                                |   |                   |                                               |   |                   |                                                    |    |                    |                                               |    |                    |                                              |    |                    |                                                                                   |    |                    |                                                             |    |                    |                          |    |                    |                    |    |                    |                                                                                        |
| 14                                                                                                    | pa_contripo_v2__14                                                                                                  | Listening to the patient                                                                               |                                                                                                                                                                                                                                                                                                                                                                                                                                                                                                                                                                                                                                                                                                                                                                                                                                                                                                                                                                                                                                                                                                                                                                                                                                                                                                                                                                                                                                                                                                                                                                                                                                                                                                                                                                                                                                                                                                                  |   |                   |                    |                  |                   |                  |   |                      |                     |                  |                   |                                                                                |   |                   |                                                                    |   |                   |                                                                                          |   |                   |                                 |   |                   |                                                |   |                   |                                               |   |                   |                                                    |    |                    |                                               |    |                    |                                              |    |                    |                                                                                   |    |                    |                                                             |    |                    |                          |    |                    |                    |    |                    |                                                                                        |
| 15                                                                                                    | pa_contripo_v2__15                                                                                                  | Other contribution                                                                                     |                                                                                                                                                                                                                                                                                                                                                                                                                                                                                                                                                                                                                                                                                                                                                                                                                                                                                                                                                                                                                                                                                                                                                                                                                                                                                                                                                                                                                                                                                                                                                                                                                                                                                                                                                                                                                                                                                                                  |   |                   |                    |                  |                   |                  |   |                      |                     |                  |                   |                                                                                |   |                   |                                                                    |   |                   |                                                                                          |   |                   |                                 |   |                   |                                                |   |                   |                                               |   |                   |                                                    |    |                    |                                               |    |                    |                                              |    |                    |                                                                                   |    |                    |                                                             |    |                    |                          |    |                    |                    |    |                    |                                                                                        |
| 16                                                                                                    | pa_contripo_v2__16                                                                                                  | No, the patient advisor has no particular contribution to make to the care trajectory.                 |                                                                                                                                                                                                                                                                                                                                                                                                                                                                                                                                                                                                                                                                                                                                                                                                                                                                                                                                                                                                                                                                                                                                                                                                                                                                                                                                                                                                                                                                                                                                                                                                                                                                                                                                                                                                                                                                                                                  |   |                   |                    |                  |                   |                  |   |                      |                     |                  |                   |                                                                                |   |                   |                                                                    |   |                   |                                                                                          |   |                   |                                 |   |                   |                                                |   |                   |                                               |   |                   |                                                    |    |                    |                                               |    |                    |                                              |    |                    |                                                                                   |    |                    |                                                             |    |                    |                          |    |                    |                    |    |                    |                                                                                        |
| 82                                                                                                    | <p>pa_ppacontripoautre_v2</p> <p>Afficher le champ UNIQUEMENT si :<br/>[pa_contripo_v2(15)] = '1'</p>               | <p>Please indicate what other contribution could make/could have been made by the patient advisor.</p> | <p>text</p> <p>Alignement personnalisé : LV</p>                                                                                                                                                                                                                                                                                                                                                                                                                                                                                                                                                                                                                                                                                                                                                                                                                                                                                                                                                                                                                                                                                                                                                                                                                                                                                                                                                                                                                                                                                                                                                                                                                                                                                                                                                                                                                                                                  |   |                   |                    |                  |                   |                  |   |                      |                     |                  |                   |                                                                                |   |                   |                                                                    |   |                   |                                                                                          |   |                   |                                 |   |                   |                                                |   |                   |                                               |   |                   |                                                    |    |                    |                                               |    |                    |                                              |    |                    |                                                                                   |    |                    |                                                             |    |                    |                          |    |                    |                    |    |                    |                                                                                        |
| 83                                                                                                    | <p>previous_personal_experience_with_pas_questionnaire_complete</p>                                                 | <p>En-tête de section : <i>Form Status</i><br/>Complete?</p>                                           | <p>dropdown</p> <table border="1"> <tr><td>0</td><td>Incomplete</td></tr> <tr><td>1</td><td>Unverified</td></tr> <tr><td>2</td><td>Complete</td></tr> </table>                                                                                                                                                                                                                                                                                                                                                                                                                                                                                                                                                                                                                                                                                                                                                                                                                                                                                                                                                                                                                                                                                                                                                                                                                                                                                                                                                                                                                                                                                                                                                                                                                                                                                                                                                   | 0 | Incomplete        | 1                  | Unverified       | 2                 | Complete         |   |                      |                     |                  |                   |                                                                                |   |                   |                                                                    |   |                   |                                                                                          |   |                   |                                 |   |                   |                                                |   |                   |                                               |   |                   |                                                    |    |                    |                                               |    |                    |                                              |    |                    |                                                                                   |    |                    |                                                             |    |                    |                          |    |                    |                    |    |                    |                                                                                        |
| 0                                                                                                     | Incomplete                                                                                                          |                                                                                                        |                                                                                                                                                                                                                                                                                                                                                                                                                                                                                                                                                                                                                                                                                                                                                                                                                                                                                                                                                                                                                                                                                                                                                                                                                                                                                                                                                                                                                                                                                                                                                                                                                                                                                                                                                                                                                                                                                                                  |   |                   |                    |                  |                   |                  |   |                      |                     |                  |                   |                                                                                |   |                   |                                                                    |   |                   |                                                                                          |   |                   |                                 |   |                   |                                                |   |                   |                                               |   |                   |                                                    |    |                    |                                               |    |                    |                                              |    |                    |                                                                                   |    |                    |                                                             |    |                    |                          |    |                    |                    |    |                    |                                                                                        |
| 1                                                                                                     | Unverified                                                                                                          |                                                                                                        |                                                                                                                                                                                                                                                                                                                                                                                                                                                                                                                                                                                                                                                                                                                                                                                                                                                                                                                                                                                                                                                                                                                                                                                                                                                                                                                                                                                                                                                                                                                                                                                                                                                                                                                                                                                                                                                                                                                  |   |                   |                    |                  |                   |                  |   |                      |                     |                  |                   |                                                                                |   |                   |                                                                    |   |                   |                                                                                          |   |                   |                                 |   |                   |                                                |   |                   |                                               |   |                   |                                                    |    |                    |                                               |    |                    |                                              |    |                    |                                                                                   |    |                    |                                                             |    |                    |                          |    |                    |                    |    |                    |                                                                                        |
| 2                                                                                                     | Complete                                                                                                            |                                                                                                        |                                                                                                                                                                                                                                                                                                                                                                                                                                                                                                                                                                                                                                                                                                                                                                                                                                                                                                                                                                                                                                                                                                                                                                                                                                                                                                                                                                                                                                                                                                                                                                                                                                                                                                                                                                                                                                                                                                                  |   |                   |                    |                  |                   |                  |   |                      |                     |                  |                   |                                                                                |   |                   |                                                                    |   |                   |                                                                                          |   |                   |                                 |   |                   |                                                |   |                   |                                               |   |                   |                                                    |    |                    |                                               |    |                    |                                              |    |                    |                                                                                   |    |                    |                                                             |    |                    |                          |    |                    |                    |    |                    |                                                                                        |
| <p>Formulaire : <b>PA-K6</b> (pak6) <span style="float: right;"><a href="#">^ Collapse</a></span></p> |                                                                                                                     |                                                                                                        |                                                                                                                                                                                                                                                                                                                                                                                                                                                                                                                                                                                                                                                                                                                                                                                                                                                                                                                                                                                                                                                                                                                                                                                                                                                                                                                                                                                                                                                                                                                                                                                                                                                                                                                                                                                                                                                                                                                  |   |                   |                    |                  |                   |                  |   |                      |                     |                  |                   |                                                                                |   |                   |                                                                    |   |                   |                                                                                          |   |                   |                                 |   |                   |                                                |   |                   |                                               |   |                   |                                                    |    |                    |                                               |    |                    |                                              |    |                    |                                                                                   |    |                    |                                                             |    |                    |                          |    |                    |                    |    |                    |                                                                                        |
| 84                                                                                                    | <p>pa_k6nerv_v2_v2_v2</p>                                                                                           | <p>During the past 30 days, about how often did you feel nervous?</p>                                  | <p>radio (Matrice)</p> <table border="1"> <tr><td>1</td><td>All of the time</td></tr> <tr><td>2</td><td>Most of the time</td></tr> <tr><td>3</td><td>Some of the time</td></tr> <tr><td>4</td><td>A little of the time</td></tr> <tr><td>5</td><td>None of the time</td></tr> </table>                                                                                                                                                                                                                                                                                                                                                                                                                                                                                                                                                                                                                                                                                                                                                                                                                                                                                                                                                                                                                                                                                                                                                                                                                                                                                                                                                                                                                                                                                                                                                                                                                           | 1 | All of the time   | 2                  | Most of the time | 3                 | Some of the time | 4 | A little of the time | 5                   | None of the time |                   |                                                                                |   |                   |                                                                    |   |                   |                                                                                          |   |                   |                                 |   |                   |                                                |   |                   |                                               |   |                   |                                                    |    |                    |                                               |    |                    |                                              |    |                    |                                                                                   |    |                    |                                                             |    |                    |                          |    |                    |                    |    |                    |                                                                                        |
| 1                                                                                                     | All of the time                                                                                                     |                                                                                                        |                                                                                                                                                                                                                                                                                                                                                                                                                                                                                                                                                                                                                                                                                                                                                                                                                                                                                                                                                                                                                                                                                                                                                                                                                                                                                                                                                                                                                                                                                                                                                                                                                                                                                                                                                                                                                                                                                                                  |   |                   |                    |                  |                   |                  |   |                      |                     |                  |                   |                                                                                |   |                   |                                                                    |   |                   |                                                                                          |   |                   |                                 |   |                   |                                                |   |                   |                                               |   |                   |                                                    |    |                    |                                               |    |                    |                                              |    |                    |                                                                                   |    |                    |                                                             |    |                    |                          |    |                    |                    |    |                    |                                                                                        |
| 2                                                                                                     | Most of the time                                                                                                    |                                                                                                        |                                                                                                                                                                                                                                                                                                                                                                                                                                                                                                                                                                                                                                                                                                                                                                                                                                                                                                                                                                                                                                                                                                                                                                                                                                                                                                                                                                                                                                                                                                                                                                                                                                                                                                                                                                                                                                                                                                                  |   |                   |                    |                  |                   |                  |   |                      |                     |                  |                   |                                                                                |   |                   |                                                                    |   |                   |                                                                                          |   |                   |                                 |   |                   |                                                |   |                   |                                               |   |                   |                                                    |    |                    |                                               |    |                    |                                              |    |                    |                                                                                   |    |                    |                                                             |    |                    |                          |    |                    |                    |    |                    |                                                                                        |
| 3                                                                                                     | Some of the time                                                                                                    |                                                                                                        |                                                                                                                                                                                                                                                                                                                                                                                                                                                                                                                                                                                                                                                                                                                                                                                                                                                                                                                                                                                                                                                                                                                                                                                                                                                                                                                                                                                                                                                                                                                                                                                                                                                                                                                                                                                                                                                                                                                  |   |                   |                    |                  |                   |                  |   |                      |                     |                  |                   |                                                                                |   |                   |                                                                    |   |                   |                                                                                          |   |                   |                                 |   |                   |                                                |   |                   |                                               |   |                   |                                                    |    |                    |                                               |    |                    |                                              |    |                    |                                                                                   |    |                    |                                                             |    |                    |                          |    |                    |                    |    |                    |                                                                                        |
| 4                                                                                                     | A little of the time                                                                                                |                                                                                                        |                                                                                                                                                                                                                                                                                                                                                                                                                                                                                                                                                                                                                                                                                                                                                                                                                                                                                                                                                                                                                                                                                                                                                                                                                                                                                                                                                                                                                                                                                                                                                                                                                                                                                                                                                                                                                                                                                                                  |   |                   |                    |                  |                   |                  |   |                      |                     |                  |                   |                                                                                |   |                   |                                                                    |   |                   |                                                                                          |   |                   |                                 |   |                   |                                                |   |                   |                                               |   |                   |                                                    |    |                    |                                               |    |                    |                                              |    |                    |                                                                                   |    |                    |                                                             |    |                    |                          |    |                    |                    |    |                    |                                                                                        |
| 5                                                                                                     | None of the time                                                                                                    |                                                                                                        |                                                                                                                                                                                                                                                                                                                                                                                                                                                                                                                                                                                                                                                                                                                                                                                                                                                                                                                                                                                                                                                                                                                                                                                                                                                                                                                                                                                                                                                                                                                                                                                                                                                                                                                                                                                                                                                                                                                  |   |                   |                    |                  |                   |                  |   |                      |                     |                  |                   |                                                                                |   |                   |                                                                    |   |                   |                                                                                          |   |                   |                                 |   |                   |                                                |   |                   |                                               |   |                   |                                                    |    |                    |                                               |    |                    |                                              |    |                    |                                                                                   |    |                    |                                                             |    |                    |                          |    |                    |                    |    |                    |                                                                                        |

|    |                       |                                                                                                     |                                                                                                                                                                                                                                                                                    |   |                 |   |                  |   |                  |   |                      |   |                  |
|----|-----------------------|-----------------------------------------------------------------------------------------------------|------------------------------------------------------------------------------------------------------------------------------------------------------------------------------------------------------------------------------------------------------------------------------------|---|-----------------|---|------------------|---|------------------|---|----------------------|---|------------------|
| 85 | pa_k6deses_v2_v2_v2   | During the past 30 days, about how often did you feel hopeless?                                     | radio (Matrice)<br><table border="1"> <tr><td>1</td><td>All of the time</td></tr> <tr><td>2</td><td>Most of the time</td></tr> <tr><td>3</td><td>Some of the time</td></tr> <tr><td>4</td><td>A little of the time</td></tr> <tr><td>5</td><td>None of the time</td></tr> </table> | 1 | All of the time | 2 | Most of the time | 3 | Some of the time | 4 | A little of the time | 5 | None of the time |
| 1  | All of the time       |                                                                                                     |                                                                                                                                                                                                                                                                                    |   |                 |   |                  |   |                  |   |                      |   |                  |
| 2  | Most of the time      |                                                                                                     |                                                                                                                                                                                                                                                                                    |   |                 |   |                  |   |                  |   |                      |   |                  |
| 3  | Some of the time      |                                                                                                     |                                                                                                                                                                                                                                                                                    |   |                 |   |                  |   |                  |   |                      |   |                  |
| 4  | A little of the time  |                                                                                                     |                                                                                                                                                                                                                                                                                    |   |                 |   |                  |   |                  |   |                      |   |                  |
| 5  | None of the time      |                                                                                                     |                                                                                                                                                                                                                                                                                    |   |                 |   |                  |   |                  |   |                      |   |                  |
| 86 | pa_k6agite_v2_v2_v2   | During the past 30 days, about how often did you feel restless or fidgety?                          | radio (Matrice)<br><table border="1"> <tr><td>1</td><td>All of the time</td></tr> <tr><td>2</td><td>Most of the time</td></tr> <tr><td>3</td><td>Some of the time</td></tr> <tr><td>4</td><td>A little of the time</td></tr> <tr><td>5</td><td>None of the time</td></tr> </table> | 1 | All of the time | 2 | Most of the time | 3 | Some of the time | 4 | A little of the time | 5 | None of the time |
| 1  | All of the time       |                                                                                                     |                                                                                                                                                                                                                                                                                    |   |                 |   |                  |   |                  |   |                      |   |                  |
| 2  | Most of the time      |                                                                                                     |                                                                                                                                                                                                                                                                                    |   |                 |   |                  |   |                  |   |                      |   |                  |
| 3  | Some of the time      |                                                                                                     |                                                                                                                                                                                                                                                                                    |   |                 |   |                  |   |                  |   |                      |   |                  |
| 4  | A little of the time  |                                                                                                     |                                                                                                                                                                                                                                                                                    |   |                 |   |                  |   |                  |   |                      |   |                  |
| 5  | None of the time      |                                                                                                     |                                                                                                                                                                                                                                                                                    |   |                 |   |                  |   |                  |   |                      |   |                  |
| 87 | pa_k6sourire_v2_v2_v2 | During the past 30 days, about how often did you feel so depressed that nothing could cheer you up? | radio (Matrice)<br><table border="1"> <tr><td>1</td><td>All of the time</td></tr> <tr><td>2</td><td>Most of the time</td></tr> <tr><td>3</td><td>Some of the time</td></tr> <tr><td>4</td><td>A little of the time</td></tr> <tr><td>5</td><td>None of the time</td></tr> </table> | 1 | All of the time | 2 | Most of the time | 3 | Some of the time | 4 | A little of the time | 5 | None of the time |
| 1  | All of the time       |                                                                                                     |                                                                                                                                                                                                                                                                                    |   |                 |   |                  |   |                  |   |                      |   |                  |
| 2  | Most of the time      |                                                                                                     |                                                                                                                                                                                                                                                                                    |   |                 |   |                  |   |                  |   |                      |   |                  |
| 3  | Some of the time      |                                                                                                     |                                                                                                                                                                                                                                                                                    |   |                 |   |                  |   |                  |   |                      |   |                  |
| 4  | A little of the time  |                                                                                                     |                                                                                                                                                                                                                                                                                    |   |                 |   |                  |   |                  |   |                      |   |                  |
| 5  | None of the time      |                                                                                                     |                                                                                                                                                                                                                                                                                    |   |                 |   |                  |   |                  |   |                      |   |                  |
| 88 | pa_k6effort_v2_v2_v2  | During the past 30 days, about how often did you feel that everything was an effort?                | radio (Matrice)<br><table border="1"> <tr><td>1</td><td>All of the time</td></tr> <tr><td>2</td><td>Most of the time</td></tr> <tr><td>3</td><td>Some of the time</td></tr> <tr><td>4</td><td>A little of the time</td></tr> <tr><td>5</td><td>None of the time</td></tr> </table> | 1 | All of the time | 2 | Most of the time | 3 | Some of the time | 4 | A little of the time | 5 | None of the time |
| 1  | All of the time       |                                                                                                     |                                                                                                                                                                                                                                                                                    |   |                 |   |                  |   |                  |   |                      |   |                  |
| 2  | Most of the time      |                                                                                                     |                                                                                                                                                                                                                                                                                    |   |                 |   |                  |   |                  |   |                      |   |                  |
| 3  | Some of the time      |                                                                                                     |                                                                                                                                                                                                                                                                                    |   |                 |   |                  |   |                  |   |                      |   |                  |
| 4  | A little of the time  |                                                                                                     |                                                                                                                                                                                                                                                                                    |   |                 |   |                  |   |                  |   |                      |   |                  |
| 5  | None of the time      |                                                                                                     |                                                                                                                                                                                                                                                                                    |   |                 |   |                  |   |                  |   |                      |   |                  |
| 89 | pa_k6rien_v2_v2_v2    | During the past 30 days, about how often did you feel worthless?                                    | radio (Matrice)<br><table border="1"> <tr><td>1</td><td>All of the time</td></tr> <tr><td>2</td><td>Most of the time</td></tr> <tr><td>3</td><td>Some of the time</td></tr> <tr><td>4</td><td>A little of the time</td></tr> <tr><td>5</td><td>None of the time</td></tr> </table> | 1 | All of the time | 2 | Most of the time | 3 | Some of the time | 4 | A little of the time | 5 | None of the time |
| 1  | All of the time       |                                                                                                     |                                                                                                                                                                                                                                                                                    |   |                 |   |                  |   |                  |   |                      |   |                  |
| 2  | Most of the time      |                                                                                                     |                                                                                                                                                                                                                                                                                    |   |                 |   |                  |   |                  |   |                      |   |                  |
| 3  | Some of the time      |                                                                                                     |                                                                                                                                                                                                                                                                                    |   |                 |   |                  |   |                  |   |                      |   |                  |
| 4  | A little of the time  |                                                                                                     |                                                                                                                                                                                                                                                                                    |   |                 |   |                  |   |                  |   |                      |   |                  |
| 5  | None of the time      |                                                                                                     |                                                                                                                                                                                                                                                                                    |   |                 |   |                  |   |                  |   |                      |   |                  |
| 90 | pak6_complete         | En-tête de section : <i>Form Status</i><br>Complete?                                                | dropdown<br><table border="1"> <tr><td>0</td><td>Incomplete</td></tr> <tr><td>1</td><td>Unverified</td></tr> <tr><td>2</td><td>Complete</td></tr> </table>                                                                                                                         | 0 | Incomplete      | 1 | Unverified       | 2 | Complete         |   |                      |   |                  |
| 0  | Incomplete            |                                                                                                     |                                                                                                                                                                                                                                                                                    |   |                 |   |                  |   |                  |   |                      |   |                  |
| 1  | Unverified            |                                                                                                     |                                                                                                                                                                                                                                                                                    |   |                 |   |                  |   |                  |   |                      |   |                  |
| 2  | Complete              |                                                                                                     |                                                                                                                                                                                                                                                                                    |   |                 |   |                  |   |                  |   |                      |   |                  |

Formulaire : **Review of PA experience with patient questionnaire** (review\_of\_pa\_experience\_with\_patient\_questionnaire)

[^ Collapse](#)

|    |                     |                                                                                                                                                                                                                                                                                                                                                                                                 |                                                                                                                                                                                                                                  |   |                   |   |                   |   |                |   |                |
|----|---------------------|-------------------------------------------------------------------------------------------------------------------------------------------------------------------------------------------------------------------------------------------------------------------------------------------------------------------------------------------------------------------------------------------------|----------------------------------------------------------------------------------------------------------------------------------------------------------------------------------------------------------------------------------|---|-------------------|---|-------------------|---|----------------|---|----------------|
| 91 | bilan_eval_res_form | En-tête de section : <i>The first section of this questionnaire aims to assess your experience as a patient advisor. The questions asked are designed to assess the extent to which the intervention implemented helped you to play your role as a patient advisor. To what extent do you agree with each of the following statements?</i><br><br>The training you have received is sufficient. | radio (Matrice)<br><table border="1"> <tr><td>1</td><td>Strongly Disagree</td></tr> <tr><td>2</td><td>Somewhat Disagree</td></tr> <tr><td>3</td><td>Somewhat agree</td></tr> <tr><td>4</td><td>Strongly agree</td></tr> </table> | 1 | Strongly Disagree | 2 | Somewhat Disagree | 3 | Somewhat agree | 4 | Strongly agree |
| 1  | Strongly Disagree   |                                                                                                                                                                                                                                                                                                                                                                                                 |                                                                                                                                                                                                                                  |   |                   |   |                   |   |                |   |                |
| 2  | Somewhat Disagree   |                                                                                                                                                                                                                                                                                                                                                                                                 |                                                                                                                                                                                                                                  |   |                   |   |                   |   |                |   |                |
| 3  | Somewhat agree      |                                                                                                                                                                                                                                                                                                                                                                                                 |                                                                                                                                                                                                                                  |   |                   |   |                   |   |                |   |                |
| 4  | Strongly agree      |                                                                                                                                                                                                                                                                                                                                                                                                 |                                                                                                                                                                                                                                  |   |                   |   |                   |   |                |   |                |
| 92 | bilan_eval_res_out  | You felt sufficiently equipped to meet the needs of patients.                                                                                                                                                                                                                                                                                                                                   | radio (Matrice)<br><table border="1"> <tr><td>1</td><td>Strongly Disagree</td></tr> <tr><td>2</td><td>Somewhat Disagree</td></tr> <tr><td>3</td><td>Somewhat agree</td></tr> <tr><td>4</td><td>Strongly agree</td></tr> </table> | 1 | Strongly Disagree | 2 | Somewhat Disagree | 3 | Somewhat agree | 4 | Strongly agree |
| 1  | Strongly Disagree   |                                                                                                                                                                                                                                                                                                                                                                                                 |                                                                                                                                                                                                                                  |   |                   |   |                   |   |                |   |                |
| 2  | Somewhat Disagree   |                                                                                                                                                                                                                                                                                                                                                                                                 |                                                                                                                                                                                                                                  |   |                   |   |                   |   |                |   |                |
| 3  | Somewhat agree      |                                                                                                                                                                                                                                                                                                                                                                                                 |                                                                                                                                                                                                                                  |   |                   |   |                   |   |                |   |                |
| 4  | Strongly agree      |                                                                                                                                                                                                                                                                                                                                                                                                 |                                                                                                                                                                                                                                  |   |                   |   |                   |   |                |   |                |
| 93 | bilan_eval_res_conf | You could attend conferences and continuing education activities.                                                                                                                                                                                                                                                                                                                               | radio (Matrice)<br><table border="1"> <tr><td>1</td><td>Strongly Disagree</td></tr> <tr><td>2</td><td>Somewhat Disagree</td></tr> <tr><td>3</td><td>Somewhat agree</td></tr> <tr><td>4</td><td>Strongly agree</td></tr> </table> | 1 | Strongly Disagree | 2 | Somewhat Disagree | 3 | Somewhat agree | 4 | Strongly agree |
| 1  | Strongly Disagree   |                                                                                                                                                                                                                                                                                                                                                                                                 |                                                                                                                                                                                                                                  |   |                   |   |                   |   |                |   |                |
| 2  | Somewhat Disagree   |                                                                                                                                                                                                                                                                                                                                                                                                 |                                                                                                                                                                                                                                  |   |                   |   |                   |   |                |   |                |
| 3  | Somewhat agree      |                                                                                                                                                                                                                                                                                                                                                                                                 |                                                                                                                                                                                                                                  |   |                   |   |                   |   |                |   |                |
| 4  | Strongly agree      |                                                                                                                                                                                                                                                                                                                                                                                                 |                                                                                                                                                                                                                                  |   |                   |   |                   |   |                |   |                |

|     |                       |                                                                                       |                                                                                                                                                                                                                                  |   |                   |   |                   |   |                |   |                |
|-----|-----------------------|---------------------------------------------------------------------------------------|----------------------------------------------------------------------------------------------------------------------------------------------------------------------------------------------------------------------------------|---|-------------------|---|-------------------|---|----------------|---|----------------|
| 94  | bilan_eval_res_ech    | Discussions and exchanges with the other patient advisors were sufficient.            | radio (Matrice)<br><table border="1"> <tr><td>1</td><td>Strongly Disagree</td></tr> <tr><td>2</td><td>Somewhat Disagree</td></tr> <tr><td>3</td><td>Somewhat agree</td></tr> <tr><td>4</td><td>Strongly agree</td></tr> </table> | 1 | Strongly Disagree | 2 | Somewhat Disagree | 3 | Somewhat agree | 4 | Strongly agree |
| 1   | Strongly Disagree     |                                                                                       |                                                                                                                                                                                                                                  |   |                   |   |                   |   |                |   |                |
| 2   | Somewhat Disagree     |                                                                                       |                                                                                                                                                                                                                                  |   |                   |   |                   |   |                |   |                |
| 3   | Somewhat agree        |                                                                                       |                                                                                                                                                                                                                                  |   |                   |   |                   |   |                |   |                |
| 4   | Strongly agree        |                                                                                       |                                                                                                                                                                                                                                  |   |                   |   |                   |   |                |   |                |
| 95  | bilan_eval_res_logis  | You felt supported in the logistical organization of patient meetings.                | radio (Matrice)<br><table border="1"> <tr><td>1</td><td>Strongly Disagree</td></tr> <tr><td>2</td><td>Somewhat Disagree</td></tr> <tr><td>3</td><td>Somewhat agree</td></tr> <tr><td>4</td><td>Strongly agree</td></tr> </table> | 1 | Strongly Disagree | 2 | Somewhat Disagree | 3 | Somewhat agree | 4 | Strongly agree |
| 1   | Strongly Disagree     |                                                                                       |                                                                                                                                                                                                                                  |   |                   |   |                   |   |                |   |                |
| 2   | Somewhat Disagree     |                                                                                       |                                                                                                                                                                                                                                  |   |                   |   |                   |   |                |   |                |
| 3   | Somewhat agree        |                                                                                       |                                                                                                                                                                                                                                  |   |                   |   |                   |   |                |   |                |
| 4   | Strongly agree        |                                                                                       |                                                                                                                                                                                                                                  |   |                   |   |                   |   |                |   |                |
| 96  | bilan_eval_res_role   | You have always felt comfortable with the roles and responsibilities assigned to you. | radio (Matrice)<br><table border="1"> <tr><td>1</td><td>Strongly Disagree</td></tr> <tr><td>2</td><td>Somewhat Disagree</td></tr> <tr><td>3</td><td>Somewhat agree</td></tr> <tr><td>4</td><td>Strongly agree</td></tr> </table> | 1 | Strongly Disagree | 2 | Somewhat Disagree | 3 | Somewhat agree | 4 | Strongly agree |
| 1   | Strongly Disagree     |                                                                                       |                                                                                                                                                                                                                                  |   |                   |   |                   |   |                |   |                |
| 2   | Somewhat Disagree     |                                                                                       |                                                                                                                                                                                                                                  |   |                   |   |                   |   |                |   |                |
| 3   | Somewhat agree        |                                                                                       |                                                                                                                                                                                                                                  |   |                   |   |                   |   |                |   |                |
| 4   | Strongly agree        |                                                                                       |                                                                                                                                                                                                                                  |   |                   |   |                   |   |                |   |                |
| 97  | bilan_eval_res_infequ | Means have been put in place to inform the health care team of your interventions.    | radio (Matrice)<br><table border="1"> <tr><td>1</td><td>Strongly Disagree</td></tr> <tr><td>2</td><td>Somewhat Disagree</td></tr> <tr><td>3</td><td>Somewhat agree</td></tr> <tr><td>4</td><td>Strongly agree</td></tr> </table> | 1 | Strongly Disagree | 2 | Somewhat Disagree | 3 | Somewhat agree | 4 | Strongly agree |
| 1   | Strongly Disagree     |                                                                                       |                                                                                                                                                                                                                                  |   |                   |   |                   |   |                |   |                |
| 2   | Somewhat Disagree     |                                                                                       |                                                                                                                                                                                                                                  |   |                   |   |                   |   |                |   |                |
| 3   | Somewhat agree        |                                                                                       |                                                                                                                                                                                                                                  |   |                   |   |                   |   |                |   |                |
| 4   | Strongly agree        |                                                                                       |                                                                                                                                                                                                                                  |   |                   |   |                   |   |                |   |                |
| 98  | bilan_eval_res_compro | It was easy to communicate with the health professionals involved.                    | radio (Matrice)<br><table border="1"> <tr><td>1</td><td>Strongly Disagree</td></tr> <tr><td>2</td><td>Somewhat Disagree</td></tr> <tr><td>3</td><td>Somewhat agree</td></tr> <tr><td>4</td><td>Strongly agree</td></tr> </table> | 1 | Strongly Disagree | 2 | Somewhat Disagree | 3 | Somewhat agree | 4 | Strongly agree |
| 1   | Strongly Disagree     |                                                                                       |                                                                                                                                                                                                                                  |   |                   |   |                   |   |                |   |                |
| 2   | Somewhat Disagree     |                                                                                       |                                                                                                                                                                                                                                  |   |                   |   |                   |   |                |   |                |
| 3   | Somewhat agree        |                                                                                       |                                                                                                                                                                                                                                  |   |                   |   |                   |   |                |   |                |
| 4   | Strongly agree        |                                                                                       |                                                                                                                                                                                                                                  |   |                   |   |                   |   |                |   |                |
| 99  | bilan_eval_res_reu    | You could attend health care team meetings.                                           | radio (Matrice)<br><table border="1"> <tr><td>1</td><td>Strongly Disagree</td></tr> <tr><td>2</td><td>Somewhat Disagree</td></tr> <tr><td>3</td><td>Somewhat agree</td></tr> <tr><td>4</td><td>Strongly agree</td></tr> </table> | 1 | Strongly Disagree | 2 | Somewhat Disagree | 3 | Somewhat agree | 4 | Strongly agree |
| 1   | Strongly Disagree     |                                                                                       |                                                                                                                                                                                                                                  |   |                   |   |                   |   |                |   |                |
| 2   | Somewhat Disagree     |                                                                                       |                                                                                                                                                                                                                                  |   |                   |   |                   |   |                |   |                |
| 3   | Somewhat agree        |                                                                                       |                                                                                                                                                                                                                                  |   |                   |   |                   |   |                |   |                |
| 4   | Strongly agree        |                                                                                       |                                                                                                                                                                                                                                  |   |                   |   |                   |   |                |   |                |
| 100 | bilan_eval_res_integ  | You felt part of the care team.                                                       | radio (Matrice)<br><table border="1"> <tr><td>1</td><td>Strongly Disagree</td></tr> <tr><td>2</td><td>Somewhat Disagree</td></tr> <tr><td>3</td><td>Somewhat agree</td></tr> <tr><td>4</td><td>Strongly agree</td></tr> </table> | 1 | Strongly Disagree | 2 | Somewhat Disagree | 3 | Somewhat agree | 4 | Strongly agree |
| 1   | Strongly Disagree     |                                                                                       |                                                                                                                                                                                                                                  |   |                   |   |                   |   |                |   |                |
| 2   | Somewhat Disagree     |                                                                                       |                                                                                                                                                                                                                                  |   |                   |   |                   |   |                |   |                |
| 3   | Somewhat agree        |                                                                                       |                                                                                                                                                                                                                                  |   |                   |   |                   |   |                |   |                |
| 4   | Strongly agree        |                                                                                       |                                                                                                                                                                                                                                  |   |                   |   |                   |   |                |   |                |
| 101 | bilan_eval_res_expe   | The people you accompanied had experiences similar to yours.                          | radio (Matrice)<br><table border="1"> <tr><td>1</td><td>Strongly Disagree</td></tr> <tr><td>2</td><td>Somewhat Disagree</td></tr> <tr><td>3</td><td>Somewhat agree</td></tr> <tr><td>4</td><td>Strongly agree</td></tr> </table> | 1 | Strongly Disagree | 2 | Somewhat Disagree | 3 | Somewhat agree | 4 | Strongly agree |
| 1   | Strongly Disagree     |                                                                                       |                                                                                                                                                                                                                                  |   |                   |   |                   |   |                |   |                |
| 2   | Somewhat Disagree     |                                                                                       |                                                                                                                                                                                                                                  |   |                   |   |                   |   |                |   |                |
| 3   | Somewhat agree        |                                                                                       |                                                                                                                                                                                                                                  |   |                   |   |                   |   |                |   |                |
| 4   | Strongly agree        |                                                                                       |                                                                                                                                                                                                                                  |   |                   |   |                   |   |                |   |                |
| 102 | bilan_eval_res_adeq   | The number of accompaniments you provided was adequate.                               | radio (Matrice)<br><table border="1"> <tr><td>1</td><td>Strongly Disagree</td></tr> <tr><td>2</td><td>Somewhat Disagree</td></tr> <tr><td>3</td><td>Somewhat agree</td></tr> <tr><td>4</td><td>Strongly agree</td></tr> </table> | 1 | Strongly Disagree | 2 | Somewhat Disagree | 3 | Somewhat agree | 4 | Strongly agree |
| 1   | Strongly Disagree     |                                                                                       |                                                                                                                                                                                                                                  |   |                   |   |                   |   |                |   |                |
| 2   | Somewhat Disagree     |                                                                                       |                                                                                                                                                                                                                                  |   |                   |   |                   |   |                |   |                |
| 3   | Somewhat agree        |                                                                                       |                                                                                                                                                                                                                                  |   |                   |   |                   |   |                |   |                |
| 4   | Strongly agree        |                                                                                       |                                                                                                                                                                                                                                  |   |                   |   |                   |   |                |   |                |
| 103 | bilan_eval_res_avant  | You had certain advantages in the establishment (parking, preferential rates).        | radio (Matrice)<br><table border="1"> <tr><td>1</td><td>Strongly Disagree</td></tr> <tr><td>2</td><td>Somewhat Disagree</td></tr> <tr><td>3</td><td>Somewhat agree</td></tr> <tr><td>4</td><td>Strongly agree</td></tr> </table> | 1 | Strongly Disagree | 2 | Somewhat Disagree | 3 | Somewhat agree | 4 | Strongly agree |
| 1   | Strongly Disagree     |                                                                                       |                                                                                                                                                                                                                                  |   |                   |   |                   |   |                |   |                |
| 2   | Somewhat Disagree     |                                                                                       |                                                                                                                                                                                                                                  |   |                   |   |                   |   |                |   |                |
| 3   | Somewhat agree        |                                                                                       |                                                                                                                                                                                                                                  |   |                   |   |                   |   |                |   |                |
| 4   | Strongly agree        |                                                                                       |                                                                                                                                                                                                                                  |   |                   |   |                   |   |                |   |                |

|     |                                                                                                 |                                                                                                                                                                                                                                                 |                                                                                                                                                                                                                                      |   |                   |   |                   |   |                |   |                |
|-----|-------------------------------------------------------------------------------------------------|-------------------------------------------------------------------------------------------------------------------------------------------------------------------------------------------------------------------------------------------------|--------------------------------------------------------------------------------------------------------------------------------------------------------------------------------------------------------------------------------------|---|-------------------|---|-------------------|---|----------------|---|----------------|
| 104 | bilan_sout_eq_logis                                                                             | <p>En-tête de section : <i>At least one member of the oncology care team (nurses, physicians, social workers, psychologists, etc.)</i></p> <p>...supported you in the logistical organization (room, documentation...) of patient meetings.</p> | <p>radio (Matrice)</p> <table border="1"> <tr><td>1</td><td>Strongly Disagree</td></tr> <tr><td>2</td><td>Somewhat Disagree</td></tr> <tr><td>3</td><td>Somewhat agree</td></tr> <tr><td>4</td><td>Strongly agree</td></tr> </table> | 1 | Strongly Disagree | 2 | Somewhat Disagree | 3 | Somewhat agree | 4 | Strongly agree |
| 1   | Strongly Disagree                                                                               |                                                                                                                                                                                                                                                 |                                                                                                                                                                                                                                      |   |                   |   |                   |   |                |   |                |
| 2   | Somewhat Disagree                                                                               |                                                                                                                                                                                                                                                 |                                                                                                                                                                                                                                      |   |                   |   |                   |   |                |   |                |
| 3   | Somewhat agree                                                                                  |                                                                                                                                                                                                                                                 |                                                                                                                                                                                                                                      |   |                   |   |                   |   |                |   |                |
| 4   | Strongly agree                                                                                  |                                                                                                                                                                                                                                                 |                                                                                                                                                                                                                                      |   |                   |   |                   |   |                |   |                |
| 105 | bilan_sout_eq_superv                                                                            | ...supervised your interventions with patients.                                                                                                                                                                                                 | <p>radio (Matrice)</p> <table border="1"> <tr><td>1</td><td>Strongly Disagree</td></tr> <tr><td>2</td><td>Somewhat Disagree</td></tr> <tr><td>3</td><td>Somewhat agree</td></tr> <tr><td>4</td><td>Strongly agree</td></tr> </table> | 1 | Strongly Disagree | 2 | Somewhat Disagree | 3 | Somewhat agree | 4 | Strongly agree |
| 1   | Strongly Disagree                                                                               |                                                                                                                                                                                                                                                 |                                                                                                                                                                                                                                      |   |                   |   |                   |   |                |   |                |
| 2   | Somewhat Disagree                                                                               |                                                                                                                                                                                                                                                 |                                                                                                                                                                                                                                      |   |                   |   |                   |   |                |   |                |
| 3   | Somewhat agree                                                                                  |                                                                                                                                                                                                                                                 |                                                                                                                                                                                                                                      |   |                   |   |                   |   |                |   |                |
| 4   | Strongly agree                                                                                  |                                                                                                                                                                                                                                                 |                                                                                                                                                                                                                                      |   |                   |   |                   |   |                |   |                |
| 106 | bilan_sout_eq_quest                                                                             | ...took the necessary time to answer your questions and discuss your interventions with you.                                                                                                                                                    | <p>radio (Matrice)</p> <table border="1"> <tr><td>1</td><td>Strongly Disagree</td></tr> <tr><td>2</td><td>Somewhat Disagree</td></tr> <tr><td>3</td><td>Somewhat agree</td></tr> <tr><td>4</td><td>Strongly agree</td></tr> </table> | 1 | Strongly Disagree | 2 | Somewhat Disagree | 3 | Somewhat agree | 4 | Strongly agree |
| 1   | Strongly Disagree                                                                               |                                                                                                                                                                                                                                                 |                                                                                                                                                                                                                                      |   |                   |   |                   |   |                |   |                |
| 2   | Somewhat Disagree                                                                               |                                                                                                                                                                                                                                                 |                                                                                                                                                                                                                                      |   |                   |   |                   |   |                |   |                |
| 3   | Somewhat agree                                                                                  |                                                                                                                                                                                                                                                 |                                                                                                                                                                                                                                      |   |                   |   |                   |   |                |   |                |
| 4   | Strongly agree                                                                                  |                                                                                                                                                                                                                                                 |                                                                                                                                                                                                                                      |   |                   |   |                   |   |                |   |                |
| 107 | bilan_sout_eq_patacc                                                                            | ...was available to provide feedback to the people who benefited from your interventions.                                                                                                                                                       | <p>radio (Matrice)</p> <table border="1"> <tr><td>1</td><td>Strongly Disagree</td></tr> <tr><td>2</td><td>Somewhat Disagree</td></tr> <tr><td>3</td><td>Somewhat agree</td></tr> <tr><td>4</td><td>Strongly agree</td></tr> </table> | 1 | Strongly Disagree | 2 | Somewhat Disagree | 3 | Somewhat agree | 4 | Strongly agree |
| 1   | Strongly Disagree                                                                               |                                                                                                                                                                                                                                                 |                                                                                                                                                                                                                                      |   |                   |   |                   |   |                |   |                |
| 2   | Somewhat Disagree                                                                               |                                                                                                                                                                                                                                                 |                                                                                                                                                                                                                                      |   |                   |   |                   |   |                |   |                |
| 3   | Somewhat agree                                                                                  |                                                                                                                                                                                                                                                 |                                                                                                                                                                                                                                      |   |                   |   |                   |   |                |   |                |
| 4   | Strongly agree                                                                                  |                                                                                                                                                                                                                                                 |                                                                                                                                                                                                                                      |   |                   |   |                   |   |                |   |                |
| 108 | <p>chumpa_v2</p> <p>Afficher le champ UNIQUEM ENT si : [0_arm_1][ppa_recru] = '0'</p>           | At least one member of the Virage team (nurses, doctors, social workers, psychologists, etc.)                                                                                                                                                   | descriptive                                                                                                                                                                                                                          |   |                   |   |                   |   |                |   |                |
| 109 | <p>bilan_virage_logis</p> <p>Afficher le champ UNIQUEM ENT si : [0_arm_1][ppa_recru] = '0'</p>  | ...supported you in the logistical organization (room, documentation...) of patient meetings.                                                                                                                                                   | <p>radio (Matrice)</p> <table border="1"> <tr><td>1</td><td>Strongly Disagree</td></tr> <tr><td>2</td><td>Somewhat Disagree</td></tr> <tr><td>3</td><td>Somewhat agree</td></tr> <tr><td>4</td><td>Strongly agree</td></tr> </table> | 1 | Strongly Disagree | 2 | Somewhat Disagree | 3 | Somewhat agree | 4 | Strongly agree |
| 1   | Strongly Disagree                                                                               |                                                                                                                                                                                                                                                 |                                                                                                                                                                                                                                      |   |                   |   |                   |   |                |   |                |
| 2   | Somewhat Disagree                                                                               |                                                                                                                                                                                                                                                 |                                                                                                                                                                                                                                      |   |                   |   |                   |   |                |   |                |
| 3   | Somewhat agree                                                                                  |                                                                                                                                                                                                                                                 |                                                                                                                                                                                                                                      |   |                   |   |                   |   |                |   |                |
| 4   | Strongly agree                                                                                  |                                                                                                                                                                                                                                                 |                                                                                                                                                                                                                                      |   |                   |   |                   |   |                |   |                |
| 110 | <p>bilan_virage_superv</p> <p>Afficher le champ UNIQUEM ENT si : [0_arm_1][ppa_recru] = '0'</p> | ...supervised your interventions with patients.                                                                                                                                                                                                 | <p>radio (Matrice)</p> <table border="1"> <tr><td>1</td><td>Strongly Disagree</td></tr> <tr><td>2</td><td>Somewhat Disagree</td></tr> <tr><td>3</td><td>Somewhat agree</td></tr> <tr><td>4</td><td>Strongly agree</td></tr> </table> | 1 | Strongly Disagree | 2 | Somewhat Disagree | 3 | Somewhat agree | 4 | Strongly agree |
| 1   | Strongly Disagree                                                                               |                                                                                                                                                                                                                                                 |                                                                                                                                                                                                                                      |   |                   |   |                   |   |                |   |                |
| 2   | Somewhat Disagree                                                                               |                                                                                                                                                                                                                                                 |                                                                                                                                                                                                                                      |   |                   |   |                   |   |                |   |                |
| 3   | Somewhat agree                                                                                  |                                                                                                                                                                                                                                                 |                                                                                                                                                                                                                                      |   |                   |   |                   |   |                |   |                |
| 4   | Strongly agree                                                                                  |                                                                                                                                                                                                                                                 |                                                                                                                                                                                                                                      |   |                   |   |                   |   |                |   |                |
| 111 | <p>bilan_virage_quest</p> <p>Afficher le champ UNIQUEM ENT si : [0_arm_1][ppa_recru] = '0'</p>  | ...took the necessary time to answer your questions and discuss your interventions with you.                                                                                                                                                    | <p>radio (Matrice)</p> <table border="1"> <tr><td>1</td><td>Strongly Disagree</td></tr> <tr><td>2</td><td>Somewhat Disagree</td></tr> <tr><td>3</td><td>Somewhat agree</td></tr> <tr><td>4</td><td>Strongly agree</td></tr> </table> | 1 | Strongly Disagree | 2 | Somewhat Disagree | 3 | Somewhat agree | 4 | Strongly agree |
| 1   | Strongly Disagree                                                                               |                                                                                                                                                                                                                                                 |                                                                                                                                                                                                                                      |   |                   |   |                   |   |                |   |                |
| 2   | Somewhat Disagree                                                                               |                                                                                                                                                                                                                                                 |                                                                                                                                                                                                                                      |   |                   |   |                   |   |                |   |                |
| 3   | Somewhat agree                                                                                  |                                                                                                                                                                                                                                                 |                                                                                                                                                                                                                                      |   |                   |   |                   |   |                |   |                |
| 4   | Strongly agree                                                                                  |                                                                                                                                                                                                                                                 |                                                                                                                                                                                                                                      |   |                   |   |                   |   |                |   |                |
| 112 | <p>bilan_virage_patacc</p> <p>Afficher le champ UNIQUEM ENT si : [0_arm_1][ppa_recru] = '0'</p> | ...was available to provide feedback to the people who benefited from your interventions.                                                                                                                                                       | <p>radio (Matrice)</p> <table border="1"> <tr><td>1</td><td>Strongly Disagree</td></tr> <tr><td>2</td><td>Somewhat Disagree</td></tr> <tr><td>3</td><td>Somewhat agree</td></tr> <tr><td>4</td><td>Strongly agree</td></tr> </table> | 1 | Strongly Disagree | 2 | Somewhat Disagree | 3 | Somewhat agree | 4 | Strongly agree |
| 1   | Strongly Disagree                                                                               |                                                                                                                                                                                                                                                 |                                                                                                                                                                                                                                      |   |                   |   |                   |   |                |   |                |
| 2   | Somewhat Disagree                                                                               |                                                                                                                                                                                                                                                 |                                                                                                                                                                                                                                      |   |                   |   |                   |   |                |   |                |
| 3   | Somewhat agree                                                                                  |                                                                                                                                                                                                                                                 |                                                                                                                                                                                                                                      |   |                   |   |                   |   |                |   |                |
| 4   | Strongly agree                                                                                  |                                                                                                                                                                                                                                                 |                                                                                                                                                                                                                                      |   |                   |   |                   |   |                |   |                |
| 113 | <p>cemt1pa_v2</p> <p>Afficher le champ UNIQUEM ENT si : [0_arm_1][ppa_recru] = '2'</p>          | At least one member of the CROIRE team (nurses, doctors, social workers, psychologists, etc.)                                                                                                                                                   | descriptive                                                                                                                                                                                                                          |   |                   |   |                   |   |                |   |                |
| 114 | <p>bilan_croire_logis</p> <p>Afficher le champ UNIQUEM ENT si : [0_arm_1][ppa_recru] = '2'</p>  | ...supported you in the logistical organization (room, documentation...) of patient meetings.                                                                                                                                                   | <p>radio (Matrice)</p> <table border="1"> <tr><td>1</td><td>Strongly Disagree</td></tr> <tr><td>2</td><td>Somewhat Disagree</td></tr> <tr><td>3</td><td>Somewhat agree</td></tr> <tr><td>4</td><td>Strongly agree</td></tr> </table> | 1 | Strongly Disagree | 2 | Somewhat Disagree | 3 | Somewhat agree | 4 | Strongly agree |
| 1   | Strongly Disagree                                                                               |                                                                                                                                                                                                                                                 |                                                                                                                                                                                                                                      |   |                   |   |                   |   |                |   |                |
| 2   | Somewhat Disagree                                                                               |                                                                                                                                                                                                                                                 |                                                                                                                                                                                                                                      |   |                   |   |                   |   |                |   |                |
| 3   | Somewhat agree                                                                                  |                                                                                                                                                                                                                                                 |                                                                                                                                                                                                                                      |   |                   |   |                   |   |                |   |                |
| 4   | Strongly agree                                                                                  |                                                                                                                                                                                                                                                 |                                                                                                                                                                                                                                      |   |                   |   |                   |   |                |   |                |

|     |                                                                                            |                                                                                                                 |                                                                                                       |
|-----|--------------------------------------------------------------------------------------------|-----------------------------------------------------------------------------------------------------------------|-------------------------------------------------------------------------------------------------------|
| 115 | bilan_croire_superv<br>Afficher le champ UNIQUEM<br>ENT si :<br>[0_arm_1][ppa_recru] = '2' | ...supervised your interventions with patients.                                                                 | radio (Matrice)<br>1 Strongly Disagree<br>2 Somewhat Disagree<br>3 Somewhat agree<br>4 Strongly agree |
| 116 | bilan_croire_quest<br>Afficher le champ UNIQUEM<br>ENT si :<br>[0_arm_1][ppa_recru] = '2'  | ...took the necessary time to answer your questions and discuss your interventions with you.                    | radio (Matrice)<br>1 Strongly Disagree<br>2 Somewhat Disagree<br>3 Somewhat agree<br>4 Strongly agree |
| 117 | bilan_croire_patacc<br>Afficher le champ UNIQUEM<br>ENT si :<br>[0_arm_1][ppa_recru] = '2' | ...was available to provide feedback to the people who benefited from your interventions.                       | radio (Matrice)<br>1 Strongly Disagree<br>2 Somewhat Disagree<br>3 Somewhat agree<br>4 Strongly agree |
| 118 | chupa_v2<br>Afficher le champ UNIQUEM<br>ENT si :<br>[0_arm_1][ppa_recru] = '3'            | At least one member of the Quebec Cancer Foundation team (nurses, doctors, social workers, psychologists, etc.) | descriptive                                                                                           |
| 119 | bilan_fqc_logis<br>Afficher le champ UNIQUEM<br>ENT si :<br>[0_arm_1][ppa_recru] = '3'     | ...supported you in the logistical organization (room, documentation...) of patient meetings.                   | radio (Matrice)<br>1 Strongly Disagree<br>2 Somewhat Disagree<br>3 Somewhat agree<br>4 Strongly agree |
| 120 | bilan_fqc_superv<br>Afficher le champ UNIQUEM<br>ENT si :<br>[0_arm_1][ppa_recru] = '3'    | ...supervised your interventions with patients.                                                                 | radio (Matrice)<br>1 Strongly Disagree<br>2 Somewhat Disagree<br>3 Somewhat agree<br>4 Strongly agree |
| 121 | bilan_fqc_quest<br>Afficher le champ UNIQUEM<br>ENT si :<br>[0_arm_1][ppa_recru] = '3'     | ...took the necessary time to answer your questions and discuss your interventions with you.                    | radio (Matrice)<br>1 Strongly Disagree<br>2 Somewhat Disagree<br>3 Somewhat agree<br>4 Strongly agree |
| 122 | bilan_fqc_patacc<br>Afficher le champ UNIQUEM<br>ENT si :<br>[0_arm_1][ppa_recru] = '3'    | ...was available to provide feedback to the people who benefited from your interventions.                       | radio (Matrice)<br>1 Strongly Disagree<br>2 Somewhat Disagree<br>3 Somewhat agree<br>4 Strongly agree |
| 123 | gaspepa_v2<br>Afficher le champ UNIQUEM<br>ENT si :<br>[0_arm_1][ppa_recru] = '6'          | At least one member of the PROCURE team (nurses, doctors, social workers, psychologists, etc.)                  | descriptive                                                                                           |
| 124 | bilan_proc_logis<br>Afficher le champ UNIQUEM<br>ENT si :<br>[0_arm_1][ppa_recru] = '6'    | ...supported you in the logistical organization (room, documentation...) of patient meetings.                   | radio (Matrice)<br>1 Strongly Disagree<br>2 Somewhat Disagree<br>3 Somewhat agree<br>4 Strongly agree |
| 125 | bilan_proc_superv<br>Afficher le champ UNIQUEM<br>ENT si :<br>[0_arm_1][ppa_recru] = '6'   | ...supervised your interventions with patients.                                                                 | radio (Matrice)<br>1 Strongly Disagree<br>2 Somewhat Disagree<br>3 Somewhat agree<br>4 Strongly agree |

|     |                                                                                           |                                                                                                      |                                                                                                       |
|-----|-------------------------------------------------------------------------------------------|------------------------------------------------------------------------------------------------------|-------------------------------------------------------------------------------------------------------|
| 126 | bilan_proc_quest<br>Afficher le champ UNIQUEM<br>ENT si :<br>[0_arm_1][ppa_recru] = '6'   | ...took the necessary time to answer your questions and discuss your interventions with you.         | radio (Matrice)<br>1 Strongly Disagree<br>2 Somewhat Disagree<br>3 Somewhat agree<br>4 Strongly agree |
| 127 | bilan_proc_patacc<br>Afficher le champ UNIQUEM<br>ENT si :<br>[0_arm_1][ppa_recru] = '6'  | ...was available to provide feedback to the people who benefited from your interventions.            | radio (Matrice)<br>1 Strongly Disagree<br>2 Somewhat Disagree<br>3 Somewhat agree<br>4 Strongly agree |
| 128 | gaspepa_ogpac_v2<br>Afficher le champ UNIQUEM<br>ENT si :<br>[0_arm_1][ppa_recru] = '6'   | At least one member of the OGPAC team (nurses, doctors, social workers, psychologists, etc.)         | descriptive                                                                                           |
| 129 | bilan_ogpac_logis<br>Afficher le champ UNIQUEM<br>ENT si :<br>[0_arm_1][ppa_recru] = '6'  | ...supported you in the logistical organization (room, documentation...) of patient meetings.        | radio (Matrice)<br>1 Strongly Disagree<br>2 Somewhat Disagree<br>3 Somewhat agree<br>4 Strongly agree |
| 130 | bilan_ogpac_superv<br>Afficher le champ UNIQUEM<br>ENT si :<br>[0_arm_1][ppa_recru] = '6' | ...supervised your interventions with patients.                                                      | radio (Matrice)<br>1 Strongly Disagree<br>2 Somewhat Disagree<br>3 Somewhat agree<br>4 Strongly agree |
| 131 | bilan_ogpac_quest<br>Afficher le champ UNIQUEM<br>ENT si :<br>[0_arm_1][ppa_recru] = '6'  | ...took the necessary time to answer your questions and discuss your interventions with you.         | radio (Matrice)<br>1 Strongly Disagree<br>2 Somewhat Disagree<br>3 Somewhat agree<br>4 Strongly agree |
| 132 | bilan_ogpac_patacc<br>Afficher le champ UNIQUEM<br>ENT si :<br>[0_arm_1][ppa_recru] = '6' | ...was available to provide feedback to the people who benefited from your interventions.            | radio (Matrice)<br>1 Strongly Disagree<br>2 Somewhat Disagree<br>3 Somewhat agree<br>4 Strongly agree |
| 133 | ctreouestpa_v2<br>Afficher le champ UNIQUEM<br>ENT si :<br>[0_arm_1][ppa_recru] = '5'     | At least one member of the Hope and Cope team (nurses, doctors, social workers, psychologists, etc.) | descriptive                                                                                           |
| 134 | bilan_co_logis<br>Afficher le champ UNIQUEM<br>ENT si :<br>[0_arm_1][ppa_recru] = '5'     | ...supported you in the logistical organization (room, documentation...) of patient meetings.        | radio (Matrice)<br>1 Strongly Disagree<br>2 Somewhat Disagree<br>3 Somewhat agree<br>4 Strongly agree |
| 135 | bilan_co_interv<br>Afficher le champ UNIQUEM<br>ENT si :<br>[0_arm_1][ppa_recru] = '5'    | ...supervised your interventions with patients.                                                      | radio (Matrice)<br>1 Strongly Disagree<br>2 Somewhat Disagree<br>3 Somewhat agree<br>4 Strongly agree |
| 136 | bilan_co_quest<br>Afficher le champ UNIQUEM<br>ENT si :<br>[0_arm_1][ppa_recru] = '5'     | ...took the necessary time to answer your questions and discuss your interventions with you.         | radio (Matrice)<br>1 Strongly Disagree<br>2 Somewhat Disagree<br>3 Somewhat agree<br>4 Strongly agree |

|     |                                                                                            |                                                                                           |                                                                                                                                 |
|-----|--------------------------------------------------------------------------------------------|-------------------------------------------------------------------------------------------|---------------------------------------------------------------------------------------------------------------------------------|
| 137 | bilan_co_patacc<br>Afficher le champ UNIQUEM<br>ENT si :<br>[0_arm_1][ppa_recru] = '5'     | ...was available to provide feedback to the people who benefited from your interventions. | radio (Matrice)<br>1 Strongly Disagree<br>2 Somewhat Disagree<br>3 Somewhat agree<br>4 Strongly agree                           |
| 138 | paq39_v2                                                                                   | The logbook at your disposal to keep track of your interventions has been useful to you.  | radio<br>1 Strongly disagree<br>2 Somewhat disagree<br>3 Somewhat agree<br>4 Strongly agree<br><br>Alignement personnalisé : LV |
| 139 | paq40_v2                                                                                   | Are there other tools at your disposal?                                                   | radio<br>1 Yes<br>2 No<br><br>Alignement personnalisé : LV                                                                      |
| 140 | paq41_v2<br>Afficher le champ UNIQUEM<br>ENT si :<br>[paq40_v2] = '1'                      | Other tool at your disposal #1:                                                           | text<br>Alignement personnalisé : LH                                                                                            |
| 141 | paq41a_v2<br>Afficher le champ UNIQUEM<br>ENT si :<br>[paq40_v2] = '1'                     | This tool put at your disposal has been useful to you.                                    | radio<br>1 Strongly Disagree<br>2 Somewhat Disagree<br>3 Somewhat agree<br>4 Strongly agree<br><br>Alignement personnalisé : LV |
| 142 | paq40_v3<br>Afficher le champ UNIQUEM<br>ENT si :<br>[paq40_v2] <> "" and [paq40_v2] = '1' | Are there other tools at your disposal?                                                   | radio<br>1 Yes<br>2 No<br><br>Alignement personnalisé : LV                                                                      |
| 143 | paq41_2_v2<br>Afficher le champ UNIQUEM<br>ENT si :<br>[paq40_v3] = '1'                    | Other tool at your disposal #2:                                                           | text<br>Alignement personnalisé : LH                                                                                            |
| 144 | paq41b_v2<br>Afficher le champ UNIQUEM<br>ENT si :<br>[paq40_v3] = '1'                     | This tool put at your disposal has been useful to you .                                   | radio<br>1 Strongly Disagree<br>2 Somewhat Disagree<br>3 Somewhat agree<br>4 Strongly agree<br><br>Alignement personnalisé : LV |
| 145 | paq40_v4<br>Afficher le champ UNIQUEM<br>ENT si :<br>[paq40_v3] <> "" and [paq40_v3] = '1' | Are there other tools at your disposal?                                                   | radio<br>1 Yes<br>2 No<br><br>Alignement personnalisé : LV                                                                      |
| 146 | paq41_3_v2<br>Afficher le champ UNIQUEM<br>ENT si :<br>[paq40_v4] = '1'                    | Other tool at your disposal #3:                                                           | text<br>Alignement personnalisé : LH                                                                                            |

|     |                                                                                            |                                                                                                                                                                                                                                                                    |                                                                                                                                                                                                                                                                                                                                                                |   |                               |   |                                        |   |                         |   |                                   |   |                |
|-----|--------------------------------------------------------------------------------------------|--------------------------------------------------------------------------------------------------------------------------------------------------------------------------------------------------------------------------------------------------------------------|----------------------------------------------------------------------------------------------------------------------------------------------------------------------------------------------------------------------------------------------------------------------------------------------------------------------------------------------------------------|---|-------------------------------|---|----------------------------------------|---|-------------------------|---|-----------------------------------|---|----------------|
| 147 | paq41c_v2<br>Afficher le champ UNIQUEM<br>ENT si :<br>[paq40_v4] = '1'                     | This tool put at your disposal has been useful to you.                                                                                                                                                                                                             | radio<br><table border="1"> <tr><td>1</td><td>Strongly Disagree</td></tr> <tr><td>2</td><td>Somewhat Disagree</td></tr> <tr><td>3</td><td>Somewhat agree</td></tr> <tr><td>4</td><td>Strongly agree</td></tr> </table><br>Alignement personnalisé : LV                                                                                                         | 1 | Strongly Disagree             | 2 | Somewhat Disagree                      | 3 | Somewhat agree          | 4 | Strongly agree                    |   |                |
| 1   | Strongly Disagree                                                                          |                                                                                                                                                                                                                                                                    |                                                                                                                                                                                                                                                                                                                                                                |   |                               |   |                                        |   |                         |   |                                   |   |                |
| 2   | Somewhat Disagree                                                                          |                                                                                                                                                                                                                                                                    |                                                                                                                                                                                                                                                                                                                                                                |   |                               |   |                                        |   |                         |   |                                   |   |                |
| 3   | Somewhat agree                                                                             |                                                                                                                                                                                                                                                                    |                                                                                                                                                                                                                                                                                                                                                                |   |                               |   |                                        |   |                         |   |                                   |   |                |
| 4   | Strongly agree                                                                             |                                                                                                                                                                                                                                                                    |                                                                                                                                                                                                                                                                                                                                                                |   |                               |   |                                        |   |                         |   |                                   |   |                |
| 148 | paq40_v5<br>Afficher le champ UNIQUEM<br>ENT si :<br>[paq40_v4] <> "" and [paq40_v4] = '1' | Are there other tools at your disposal?                                                                                                                                                                                                                            | radio<br><table border="1"> <tr><td>1</td><td>Yes</td></tr> <tr><td>2</td><td>No</td></tr> </table><br>Alignement personnalisé : LV                                                                                                                                                                                                                            | 1 | Yes                           | 2 | No                                     |   |                         |   |                                   |   |                |
| 1   | Yes                                                                                        |                                                                                                                                                                                                                                                                    |                                                                                                                                                                                                                                                                                                                                                                |   |                               |   |                                        |   |                         |   |                                   |   |                |
| 2   | No                                                                                         |                                                                                                                                                                                                                                                                    |                                                                                                                                                                                                                                                                                                                                                                |   |                               |   |                                        |   |                         |   |                                   |   |                |
| 149 | paq41_4_v2<br>Afficher le champ UNIQUEM<br>ENT si :<br>[paq40_v5] = '1'                    | Other tool at your disposal #4:                                                                                                                                                                                                                                    | text<br>Alignement personnalisé : LH                                                                                                                                                                                                                                                                                                                           |   |                               |   |                                        |   |                         |   |                                   |   |                |
| 150 | paq41d_v2<br>Afficher le champ UNIQUEM<br>ENT si :<br>[paq40_v5] = '1'                     | This tool put at your disposal has been useful to you.                                                                                                                                                                                                             | radio<br><table border="1"> <tr><td>1</td><td>Strongly Disagree</td></tr> <tr><td>2</td><td>Somewhat Disagree</td></tr> <tr><td>3</td><td>Somewhat agree</td></tr> <tr><td>4</td><td>Strongly agree</td></tr> </table><br>Alignement personnalisé : LV                                                                                                         | 1 | Strongly Disagree             | 2 | Somewhat Disagree                      | 3 | Somewhat agree          | 4 | Strongly agree                    |   |                |
| 1   | Strongly Disagree                                                                          |                                                                                                                                                                                                                                                                    |                                                                                                                                                                                                                                                                                                                                                                |   |                               |   |                                        |   |                         |   |                                   |   |                |
| 2   | Somewhat Disagree                                                                          |                                                                                                                                                                                                                                                                    |                                                                                                                                                                                                                                                                                                                                                                |   |                               |   |                                        |   |                         |   |                                   |   |                |
| 3   | Somewhat agree                                                                             |                                                                                                                                                                                                                                                                    |                                                                                                                                                                                                                                                                                                                                                                |   |                               |   |                                        |   |                         |   |                                   |   |                |
| 4   | Strongly agree                                                                             |                                                                                                                                                                                                                                                                    |                                                                                                                                                                                                                                                                                                                                                                |   |                               |   |                                        |   |                         |   |                                   |   |                |
| 151 | paq42_v2                                                                                   | Please indicate your overall level of appreciation of your experience as a patient advisor using the response options below.                                                                                                                                       | radio<br><table border="1"> <tr><td>1</td><td>I did not enjoy my experience</td></tr> <tr><td>2</td><td>I moderately appreciated my experience</td></tr> <tr><td>3</td><td>I enjoyed my experience</td></tr> <tr><td>4</td><td>I enjoyed my experience very much</td></tr> <tr><td>5</td><td>Not applicable</td></tr> </table><br>Alignement personnalisé : LV | 1 | I did not enjoy my experience | 2 | I moderately appreciated my experience | 3 | I enjoyed my experience | 4 | I enjoyed my experience very much | 5 | Not applicable |
| 1   | I did not enjoy my experience                                                              |                                                                                                                                                                                                                                                                    |                                                                                                                                                                                                                                                                                                                                                                |   |                               |   |                                        |   |                         |   |                                   |   |                |
| 2   | I moderately appreciated my experience                                                     |                                                                                                                                                                                                                                                                    |                                                                                                                                                                                                                                                                                                                                                                |   |                               |   |                                        |   |                         |   |                                   |   |                |
| 3   | I enjoyed my experience                                                                    |                                                                                                                                                                                                                                                                    |                                                                                                                                                                                                                                                                                                                                                                |   |                               |   |                                        |   |                         |   |                                   |   |                |
| 4   | I enjoyed my experience very much                                                          |                                                                                                                                                                                                                                                                    |                                                                                                                                                                                                                                                                                                                                                                |   |                               |   |                                        |   |                         |   |                                   |   |                |
| 5   | Not applicable                                                                             |                                                                                                                                                                                                                                                                    |                                                                                                                                                                                                                                                                                                                                                                |   |                               |   |                                        |   |                         |   |                                   |   |                |
| 152 | paq43a_v2                                                                                  | En-tête de section : <i>The purpose of this section is to identify the information that has been provided to you to assist you in your role as a patient advisor.</i><br><br>Organizational aspects<br><br>Did you receive the information you needed regarding... | descriptive                                                                                                                                                                                                                                                                                                                                                    |   |                               |   |                                        |   |                         |   |                                   |   |                |
| 153 | bilan_org_role                                                                             | ...your role as a patient advisor?                                                                                                                                                                                                                                 | radio (Matrice)<br><table border="1"> <tr><td>1</td><td>No</td></tr> <tr><td>2</td><td>Yes, in part</td></tr> <tr><td>3</td><td>Yes, absolutely</td></tr> <tr><td>4</td><td>I didn't need it</td></tr> <tr><td>5</td><td>Not applicable</td></tr> </table>                                                                                                     | 1 | No                            | 2 | Yes, in part                           | 3 | Yes, absolutely         | 4 | I didn't need it                  | 5 | Not applicable |
| 1   | No                                                                                         |                                                                                                                                                                                                                                                                    |                                                                                                                                                                                                                                                                                                                                                                |   |                               |   |                                        |   |                         |   |                                   |   |                |
| 2   | Yes, in part                                                                               |                                                                                                                                                                                                                                                                    |                                                                                                                                                                                                                                                                                                                                                                |   |                               |   |                                        |   |                         |   |                                   |   |                |
| 3   | Yes, absolutely                                                                            |                                                                                                                                                                                                                                                                    |                                                                                                                                                                                                                                                                                                                                                                |   |                               |   |                                        |   |                         |   |                                   |   |                |
| 4   | I didn't need it                                                                           |                                                                                                                                                                                                                                                                    |                                                                                                                                                                                                                                                                                                                                                                |   |                               |   |                                        |   |                         |   |                                   |   |                |
| 5   | Not applicable                                                                             |                                                                                                                                                                                                                                                                    |                                                                                                                                                                                                                                                                                                                                                                |   |                               |   |                                        |   |                         |   |                                   |   |                |
| 154 | bilan_org_rolpro                                                                           | ...the role of different health professionals?                                                                                                                                                                                                                     | radio (Matrice)<br><table border="1"> <tr><td>1</td><td>No</td></tr> <tr><td>2</td><td>Yes, in part</td></tr> <tr><td>3</td><td>Yes, absolutely</td></tr> <tr><td>4</td><td>I didn't need it</td></tr> <tr><td>5</td><td>Not applicable</td></tr> </table>                                                                                                     | 1 | No                            | 2 | Yes, in part                           | 3 | Yes, absolutely         | 4 | I didn't need it                  | 5 | Not applicable |
| 1   | No                                                                                         |                                                                                                                                                                                                                                                                    |                                                                                                                                                                                                                                                                                                                                                                |   |                               |   |                                        |   |                         |   |                                   |   |                |
| 2   | Yes, in part                                                                               |                                                                                                                                                                                                                                                                    |                                                                                                                                                                                                                                                                                                                                                                |   |                               |   |                                        |   |                         |   |                                   |   |                |
| 3   | Yes, absolutely                                                                            |                                                                                                                                                                                                                                                                    |                                                                                                                                                                                                                                                                                                                                                                |   |                               |   |                                        |   |                         |   |                                   |   |                |
| 4   | I didn't need it                                                                           |                                                                                                                                                                                                                                                                    |                                                                                                                                                                                                                                                                                                                                                                |   |                               |   |                                        |   |                         |   |                                   |   |                |
| 5   | Not applicable                                                                             |                                                                                                                                                                                                                                                                    |                                                                                                                                                                                                                                                                                                                                                                |   |                               |   |                                        |   |                         |   |                                   |   |                |
| 155 | bilan_org_organisme                                                                        | ...the role of external and internal organizations?                                                                                                                                                                                                                | radio (Matrice)<br><table border="1"> <tr><td>1</td><td>No</td></tr> <tr><td>2</td><td>Yes, in part</td></tr> <tr><td>3</td><td>Yes, absolutely</td></tr> <tr><td>4</td><td>I didn't need it</td></tr> <tr><td>5</td><td>Not applicable</td></tr> </table>                                                                                                     | 1 | No                            | 2 | Yes, in part                           | 3 | Yes, absolutely         | 4 | I didn't need it                  | 5 | Not applicable |
| 1   | No                                                                                         |                                                                                                                                                                                                                                                                    |                                                                                                                                                                                                                                                                                                                                                                |   |                               |   |                                        |   |                         |   |                                   |   |                |
| 2   | Yes, in part                                                                               |                                                                                                                                                                                                                                                                    |                                                                                                                                                                                                                                                                                                                                                                |   |                               |   |                                        |   |                         |   |                                   |   |                |
| 3   | Yes, absolutely                                                                            |                                                                                                                                                                                                                                                                    |                                                                                                                                                                                                                                                                                                                                                                |   |                               |   |                                        |   |                         |   |                                   |   |                |
| 4   | I didn't need it                                                                           |                                                                                                                                                                                                                                                                    |                                                                                                                                                                                                                                                                                                                                                                |   |                               |   |                                        |   |                         |   |                                   |   |                |
| 5   | Not applicable                                                                             |                                                                                                                                                                                                                                                                    |                                                                                                                                                                                                                                                                                                                                                                |   |                               |   |                                        |   |                         |   |                                   |   |                |

|     |                                                                                   |                                                                                                                                                                   |                                                                                                                                                                                                                                                                |   |    |   |              |   |                 |   |                  |   |                |
|-----|-----------------------------------------------------------------------------------|-------------------------------------------------------------------------------------------------------------------------------------------------------------------|----------------------------------------------------------------------------------------------------------------------------------------------------------------------------------------------------------------------------------------------------------------|---|----|---|--------------|---|-----------------|---|------------------|---|----------------|
| 156 | bilan_org_traj                                                                    | ...the care trajectory?                                                                                                                                           | <p>radio (Matrice)</p> <table border="1"> <tr><td>1</td><td>No</td></tr> <tr><td>2</td><td>Yes, in part</td></tr> <tr><td>3</td><td>Yes, absolutely</td></tr> <tr><td>4</td><td>I didn't need it</td></tr> <tr><td>5</td><td>Not applicable</td></tr> </table> | 1 | No | 2 | Yes, in part | 3 | Yes, absolutely | 4 | I didn't need it | 5 | Not applicable |
| 1   | No                                                                                |                                                                                                                                                                   |                                                                                                                                                                                                                                                                |   |    |   |              |   |                 |   |                  |   |                |
| 2   | Yes, in part                                                                      |                                                                                                                                                                   |                                                                                                                                                                                                                                                                |   |    |   |              |   |                 |   |                  |   |                |
| 3   | Yes, absolutely                                                                   |                                                                                                                                                                   |                                                                                                                                                                                                                                                                |   |    |   |              |   |                 |   |                  |   |                |
| 4   | I didn't need it                                                                  |                                                                                                                                                                   |                                                                                                                                                                                                                                                                |   |    |   |              |   |                 |   |                  |   |                |
| 5   | Not applicable                                                                    |                                                                                                                                                                   |                                                                                                                                                                                                                                                                |   |    |   |              |   |                 |   |                  |   |                |
| 157 | bilan_org_droits                                                                  | ...the patient's rights (e.g., refusing treatment, asking questions)?                                                                                             | <p>radio (Matrice)</p> <table border="1"> <tr><td>1</td><td>No</td></tr> <tr><td>2</td><td>Yes, in part</td></tr> <tr><td>3</td><td>Yes, absolutely</td></tr> <tr><td>4</td><td>I didn't need it</td></tr> <tr><td>5</td><td>Not applicable</td></tr> </table> | 1 | No | 2 | Yes, in part | 3 | Yes, absolutely | 4 | I didn't need it | 5 | Not applicable |
| 1   | No                                                                                |                                                                                                                                                                   |                                                                                                                                                                                                                                                                |   |    |   |              |   |                 |   |                  |   |                |
| 2   | Yes, in part                                                                      |                                                                                                                                                                   |                                                                                                                                                                                                                                                                |   |    |   |              |   |                 |   |                  |   |                |
| 3   | Yes, absolutely                                                                   |                                                                                                                                                                   |                                                                                                                                                                                                                                                                |   |    |   |              |   |                 |   |                  |   |                |
| 4   | I didn't need it                                                                  |                                                                                                                                                                   |                                                                                                                                                                                                                                                                |   |    |   |              |   |                 |   |                  |   |                |
| 5   | Not applicable                                                                    |                                                                                                                                                                   |                                                                                                                                                                                                                                                                |   |    |   |              |   |                 |   |                  |   |                |
| 158 | bilan_org_rdvmed                                                                  | ...where and how to get to medical appointments?                                                                                                                  | <p>radio (Matrice)</p> <table border="1"> <tr><td>1</td><td>No</td></tr> <tr><td>2</td><td>Yes, in part</td></tr> <tr><td>3</td><td>Yes, absolutely</td></tr> <tr><td>4</td><td>I didn't need it</td></tr> <tr><td>5</td><td>Not applicable</td></tr> </table> | 1 | No | 2 | Yes, in part | 3 | Yes, absolutely | 4 | I didn't need it | 5 | Not applicable |
| 1   | No                                                                                |                                                                                                                                                                   |                                                                                                                                                                                                                                                                |   |    |   |              |   |                 |   |                  |   |                |
| 2   | Yes, in part                                                                      |                                                                                                                                                                   |                                                                                                                                                                                                                                                                |   |    |   |              |   |                 |   |                  |   |                |
| 3   | Yes, absolutely                                                                   |                                                                                                                                                                   |                                                                                                                                                                                                                                                                |   |    |   |              |   |                 |   |                  |   |                |
| 4   | I didn't need it                                                                  |                                                                                                                                                                   |                                                                                                                                                                                                                                                                |   |    |   |              |   |                 |   |                  |   |                |
| 5   | Not applicable                                                                    |                                                                                                                                                                   |                                                                                                                                                                                                                                                                |   |    |   |              |   |                 |   |                  |   |                |
| 159 | bilan_org_transp                                                                  | ...financial support for patients and transportation assistance?                                                                                                  | <p>radio (Matrice)</p> <table border="1"> <tr><td>1</td><td>No</td></tr> <tr><td>2</td><td>Yes, in part</td></tr> <tr><td>3</td><td>Yes, absolutely</td></tr> <tr><td>4</td><td>I didn't need it</td></tr> <tr><td>5</td><td>Not applicable</td></tr> </table> | 1 | No | 2 | Yes, in part | 3 | Yes, absolutely | 4 | I didn't need it | 5 | Not applicable |
| 1   | No                                                                                |                                                                                                                                                                   |                                                                                                                                                                                                                                                                |   |    |   |              |   |                 |   |                  |   |                |
| 2   | Yes, in part                                                                      |                                                                                                                                                                   |                                                                                                                                                                                                                                                                |   |    |   |              |   |                 |   |                  |   |                |
| 3   | Yes, absolutely                                                                   |                                                                                                                                                                   |                                                                                                                                                                                                                                                                |   |    |   |              |   |                 |   |                  |   |                |
| 4   | I didn't need it                                                                  |                                                                                                                                                                   |                                                                                                                                                                                                                                                                |   |    |   |              |   |                 |   |                  |   |                |
| 5   | Not applicable                                                                    |                                                                                                                                                                   |                                                                                                                                                                                                                                                                |   |    |   |              |   |                 |   |                  |   |                |
| 160 | bilan_org_projet                                                                  | ...the PAROLE-Onco research project?                                                                                                                              | <p>radio (Matrice)</p> <table border="1"> <tr><td>1</td><td>No</td></tr> <tr><td>2</td><td>Yes, in part</td></tr> <tr><td>3</td><td>Yes, absolutely</td></tr> <tr><td>4</td><td>I didn't need it</td></tr> <tr><td>5</td><td>Not applicable</td></tr> </table> | 1 | No | 2 | Yes, in part | 3 | Yes, absolutely | 4 | I didn't need it | 5 | Not applicable |
| 1   | No                                                                                |                                                                                                                                                                   |                                                                                                                                                                                                                                                                |   |    |   |              |   |                 |   |                  |   |                |
| 2   | Yes, in part                                                                      |                                                                                                                                                                   |                                                                                                                                                                                                                                                                |   |    |   |              |   |                 |   |                  |   |                |
| 3   | Yes, absolutely                                                                   |                                                                                                                                                                   |                                                                                                                                                                                                                                                                |   |    |   |              |   |                 |   |                  |   |                |
| 4   | I didn't need it                                                                  |                                                                                                                                                                   |                                                                                                                                                                                                                                                                |   |    |   |              |   |                 |   |                  |   |                |
| 5   | Not applicable                                                                    |                                                                                                                                                                   |                                                                                                                                                                                                                                                                |   |    |   |              |   |                 |   |                  |   |                |
| 161 | bilan_org_autre                                                                   | Did you receive any other organizational information?                                                                                                             | <p>radio</p> <table border="1"> <tr><td>0</td><td>No</td></tr> <tr><td>1</td><td>Yes</td></tr> </table> <p>Alignement personnalisé : LH</p>                                                                                                                    | 0 | No | 1 | Yes          |   |                 |   |                  |   |                |
| 0   | No                                                                                |                                                                                                                                                                   |                                                                                                                                                                                                                                                                |   |    |   |              |   |                 |   |                  |   |                |
| 1   | Yes                                                                               |                                                                                                                                                                   |                                                                                                                                                                                                                                                                |   |    |   |              |   |                 |   |                  |   |                |
| 162 | <p>paq52_v2</p> <p>Afficher le champ UNIQUEM ENT si : [bilan_org_autre] = '1'</p> | If yes, please specify which ones.                                                                                                                                | <p>notes</p> <p>Alignement personnalisé : LH</p>                                                                                                                                                                                                               |   |    |   |              |   |                 |   |                  |   |                |
| 163 | bilan_relat_savoirs                                                               | <p>En-tête de section : <i>The relational aspects Did you receive the information you needed regarding...</i></p> <p>...the attitudes and the skills to have?</p> | <p>radio (Matrice)</p> <table border="1"> <tr><td>1</td><td>No</td></tr> <tr><td>2</td><td>Yes, in part</td></tr> <tr><td>3</td><td>Yes, absolutely</td></tr> <tr><td>4</td><td>I didn't need it</td></tr> <tr><td>5</td><td>Not applicable</td></tr> </table> | 1 | No | 2 | Yes, in part | 3 | Yes, absolutely | 4 | I didn't need it | 5 | Not applicable |
| 1   | No                                                                                |                                                                                                                                                                   |                                                                                                                                                                                                                                                                |   |    |   |              |   |                 |   |                  |   |                |
| 2   | Yes, in part                                                                      |                                                                                                                                                                   |                                                                                                                                                                                                                                                                |   |    |   |              |   |                 |   |                  |   |                |
| 3   | Yes, absolutely                                                                   |                                                                                                                                                                   |                                                                                                                                                                                                                                                                |   |    |   |              |   |                 |   |                  |   |                |
| 4   | I didn't need it                                                                  |                                                                                                                                                                   |                                                                                                                                                                                                                                                                |   |    |   |              |   |                 |   |                  |   |                |
| 5   | Not applicable                                                                    |                                                                                                                                                                   |                                                                                                                                                                                                                                                                |   |    |   |              |   |                 |   |                  |   |                |
| 164 | bilan_relat_fami                                                                  | ...familiarity?                                                                                                                                                   | <p>radio (Matrice)</p> <table border="1"> <tr><td>1</td><td>No</td></tr> <tr><td>2</td><td>Yes, in part</td></tr> <tr><td>3</td><td>Yes, absolutely</td></tr> <tr><td>4</td><td>I didn't need it</td></tr> <tr><td>5</td><td>Not applicable</td></tr> </table> | 1 | No | 2 | Yes, in part | 3 | Yes, absolutely | 4 | I didn't need it | 5 | Not applicable |
| 1   | No                                                                                |                                                                                                                                                                   |                                                                                                                                                                                                                                                                |   |    |   |              |   |                 |   |                  |   |                |
| 2   | Yes, in part                                                                      |                                                                                                                                                                   |                                                                                                                                                                                                                                                                |   |    |   |              |   |                 |   |                  |   |                |
| 3   | Yes, absolutely                                                                   |                                                                                                                                                                   |                                                                                                                                                                                                                                                                |   |    |   |              |   |                 |   |                  |   |                |
| 4   | I didn't need it                                                                  |                                                                                                                                                                   |                                                                                                                                                                                                                                                                |   |    |   |              |   |                 |   |                  |   |                |
| 5   | Not applicable                                                                    |                                                                                                                                                                   |                                                                                                                                                                                                                                                                |   |    |   |              |   |                 |   |                  |   |                |

|     |                                                                          |                                                                                                                                                                                           |                                                                                                                                                                                                                                                         |   |     |   |              |   |                 |   |                  |   |                |
|-----|--------------------------------------------------------------------------|-------------------------------------------------------------------------------------------------------------------------------------------------------------------------------------------|---------------------------------------------------------------------------------------------------------------------------------------------------------------------------------------------------------------------------------------------------------|---|-----|---|--------------|---|-----------------|---|------------------|---|----------------|
| 165 | bilan_relat_imprev                                                       | ...managing unexpected situations?                                                                                                                                                        | radio (Matrice) <table border="1"> <tr><td>1</td><td>No</td></tr> <tr><td>2</td><td>Yes, in part</td></tr> <tr><td>3</td><td>Yes, absolutely</td></tr> <tr><td>4</td><td>I didn't need it</td></tr> <tr><td>5</td><td>Not applicable</td></tr> </table> | 1 | No  | 2 | Yes, in part | 3 | Yes, absolutely | 4 | I didn't need it | 5 | Not applicable |
| 1   | No                                                                       |                                                                                                                                                                                           |                                                                                                                                                                                                                                                         |   |     |   |              |   |                 |   |                  |   |                |
| 2   | Yes, in part                                                             |                                                                                                                                                                                           |                                                                                                                                                                                                                                                         |   |     |   |              |   |                 |   |                  |   |                |
| 3   | Yes, absolutely                                                          |                                                                                                                                                                                           |                                                                                                                                                                                                                                                         |   |     |   |              |   |                 |   |                  |   |                |
| 4   | I didn't need it                                                         |                                                                                                                                                                                           |                                                                                                                                                                                                                                                         |   |     |   |              |   |                 |   |                  |   |                |
| 5   | Not applicable                                                           |                                                                                                                                                                                           |                                                                                                                                                                                                                                                         |   |     |   |              |   |                 |   |                  |   |                |
| 166 | bilan_relat_conflit                                                      | ...conflict management?                                                                                                                                                                   | radio (Matrice) <table border="1"> <tr><td>1</td><td>No</td></tr> <tr><td>2</td><td>Yes, in part</td></tr> <tr><td>3</td><td>Yes, absolutely</td></tr> <tr><td>4</td><td>I didn't need it</td></tr> <tr><td>5</td><td>Not applicable</td></tr> </table> | 1 | No  | 2 | Yes, in part | 3 | Yes, absolutely | 4 | I didn't need it | 5 | Not applicable |
| 1   | No                                                                       |                                                                                                                                                                                           |                                                                                                                                                                                                                                                         |   |     |   |              |   |                 |   |                  |   |                |
| 2   | Yes, in part                                                             |                                                                                                                                                                                           |                                                                                                                                                                                                                                                         |   |     |   |              |   |                 |   |                  |   |                |
| 3   | Yes, absolutely                                                          |                                                                                                                                                                                           |                                                                                                                                                                                                                                                         |   |     |   |              |   |                 |   |                  |   |                |
| 4   | I didn't need it                                                         |                                                                                                                                                                                           |                                                                                                                                                                                                                                                         |   |     |   |              |   |                 |   |                  |   |                |
| 5   | Not applicable                                                           |                                                                                                                                                                                           |                                                                                                                                                                                                                                                         |   |     |   |              |   |                 |   |                  |   |                |
| 167 | bilan_relat_aide                                                         | ...the helping relationship?                                                                                                                                                              | radio (Matrice) <table border="1"> <tr><td>1</td><td>No</td></tr> <tr><td>2</td><td>Yes, in part</td></tr> <tr><td>3</td><td>Yes, absolutely</td></tr> <tr><td>4</td><td>I didn't need it</td></tr> <tr><td>5</td><td>Not applicable</td></tr> </table> | 1 | No  | 2 | Yes, in part | 3 | Yes, absolutely | 4 | I didn't need it | 5 | Not applicable |
| 1   | No                                                                       |                                                                                                                                                                                           |                                                                                                                                                                                                                                                         |   |     |   |              |   |                 |   |                  |   |                |
| 2   | Yes, in part                                                             |                                                                                                                                                                                           |                                                                                                                                                                                                                                                         |   |     |   |              |   |                 |   |                  |   |                |
| 3   | Yes, absolutely                                                          |                                                                                                                                                                                           |                                                                                                                                                                                                                                                         |   |     |   |              |   |                 |   |                  |   |                |
| 4   | I didn't need it                                                         |                                                                                                                                                                                           |                                                                                                                                                                                                                                                         |   |     |   |              |   |                 |   |                  |   |                |
| 5   | Not applicable                                                           |                                                                                                                                                                                           |                                                                                                                                                                                                                                                         |   |     |   |              |   |                 |   |                  |   |                |
| 168 | bilan_org_autre_2                                                        | Did you receive any other information on relational aspects?                                                                                                                              | radio <table border="1"> <tr><td>1</td><td>Yes</td></tr> <tr><td>0</td><td>No</td></tr> </table><br>Alignement personnalisé : LH                                                                                                                        | 1 | Yes | 0 | No           |   |                 |   |                  |   |                |
| 1   | Yes                                                                      |                                                                                                                                                                                           |                                                                                                                                                                                                                                                         |   |     |   |              |   |                 |   |                  |   |                |
| 0   | No                                                                       |                                                                                                                                                                                           |                                                                                                                                                                                                                                                         |   |     |   |              |   |                 |   |                  |   |                |
| 169 | paq59_v2<br>Afficher le champ UNIQUEM ENT si : [bilan_org_autre_2] = '1' | If yes, please specify which ones.                                                                                                                                                        | notes<br>Alignement personnalisé : LV                                                                                                                                                                                                                   |   |     |   |              |   |                 |   |                  |   |                |
| 170 | bilan_clin_annon                                                         | En-tête de section : <i>Clinical aspects Did you receive the information you needed regarding...</i><br>...the announcement of the cancer diagnosis/genetic predisposition by the doctor? | radio (Matrice) <table border="1"> <tr><td>1</td><td>No</td></tr> <tr><td>2</td><td>Yes, in part</td></tr> <tr><td>3</td><td>Yes, absolutely</td></tr> <tr><td>4</td><td>I didn't need it</td></tr> <tr><td>5</td><td>Not applicable</td></tr> </table> | 1 | No  | 2 | Yes, in part | 3 | Yes, absolutely | 4 | I didn't need it | 5 | Not applicable |
| 1   | No                                                                       |                                                                                                                                                                                           |                                                                                                                                                                                                                                                         |   |     |   |              |   |                 |   |                  |   |                |
| 2   | Yes, in part                                                             |                                                                                                                                                                                           |                                                                                                                                                                                                                                                         |   |     |   |              |   |                 |   |                  |   |                |
| 3   | Yes, absolutely                                                          |                                                                                                                                                                                           |                                                                                                                                                                                                                                                         |   |     |   |              |   |                 |   |                  |   |                |
| 4   | I didn't need it                                                         |                                                                                                                                                                                           |                                                                                                                                                                                                                                                         |   |     |   |              |   |                 |   |                  |   |                |
| 5   | Not applicable                                                           |                                                                                                                                                                                           |                                                                                                                                                                                                                                                         |   |     |   |              |   |                 |   |                  |   |                |
| 171 | bilan_clin_cancer                                                        | ...cancer?                                                                                                                                                                                | radio (Matrice) <table border="1"> <tr><td>1</td><td>No</td></tr> <tr><td>2</td><td>Yes, in part</td></tr> <tr><td>3</td><td>Yes, absolutely</td></tr> <tr><td>4</td><td>I didn't need it</td></tr> <tr><td>5</td><td>Not applicable</td></tr> </table> | 1 | No  | 2 | Yes, in part | 3 | Yes, absolutely | 4 | I didn't need it | 5 | Not applicable |
| 1   | No                                                                       |                                                                                                                                                                                           |                                                                                                                                                                                                                                                         |   |     |   |              |   |                 |   |                  |   |                |
| 2   | Yes, in part                                                             |                                                                                                                                                                                           |                                                                                                                                                                                                                                                         |   |     |   |              |   |                 |   |                  |   |                |
| 3   | Yes, absolutely                                                          |                                                                                                                                                                                           |                                                                                                                                                                                                                                                         |   |     |   |              |   |                 |   |                  |   |                |
| 4   | I didn't need it                                                         |                                                                                                                                                                                           |                                                                                                                                                                                                                                                         |   |     |   |              |   |                 |   |                  |   |                |
| 5   | Not applicable                                                           |                                                                                                                                                                                           |                                                                                                                                                                                                                                                         |   |     |   |              |   |                 |   |                  |   |                |
| 172 | bilan_clin_oncogen                                                       | ... oncogenetics?                                                                                                                                                                         | radio (Matrice) <table border="1"> <tr><td>1</td><td>No</td></tr> <tr><td>2</td><td>Yes, in part</td></tr> <tr><td>3</td><td>Yes, absolutely</td></tr> <tr><td>4</td><td>I didn't need it</td></tr> <tr><td>5</td><td>Not applicable</td></tr> </table> | 1 | No  | 2 | Yes, in part | 3 | Yes, absolutely | 4 | I didn't need it | 5 | Not applicable |
| 1   | No                                                                       |                                                                                                                                                                                           |                                                                                                                                                                                                                                                         |   |     |   |              |   |                 |   |                  |   |                |
| 2   | Yes, in part                                                             |                                                                                                                                                                                           |                                                                                                                                                                                                                                                         |   |     |   |              |   |                 |   |                  |   |                |
| 3   | Yes, absolutely                                                          |                                                                                                                                                                                           |                                                                                                                                                                                                                                                         |   |     |   |              |   |                 |   |                  |   |                |
| 4   | I didn't need it                                                         |                                                                                                                                                                                           |                                                                                                                                                                                                                                                         |   |     |   |              |   |                 |   |                  |   |                |
| 5   | Not applicable                                                           |                                                                                                                                                                                           |                                                                                                                                                                                                                                                         |   |     |   |              |   |                 |   |                  |   |                |
| 173 | bilan_clin_tests                                                         | ...genetic testing?                                                                                                                                                                       | radio (Matrice) <table border="1"> <tr><td>1</td><td>No</td></tr> <tr><td>2</td><td>Yes, in part</td></tr> <tr><td>3</td><td>Yes, absolutely</td></tr> <tr><td>4</td><td>I didn't need it</td></tr> <tr><td>5</td><td>Not applicable</td></tr> </table> | 1 | No  | 2 | Yes, in part | 3 | Yes, absolutely | 4 | I didn't need it | 5 | Not applicable |
| 1   | No                                                                       |                                                                                                                                                                                           |                                                                                                                                                                                                                                                         |   |     |   |              |   |                 |   |                  |   |                |
| 2   | Yes, in part                                                             |                                                                                                                                                                                           |                                                                                                                                                                                                                                                         |   |     |   |              |   |                 |   |                  |   |                |
| 3   | Yes, absolutely                                                          |                                                                                                                                                                                           |                                                                                                                                                                                                                                                         |   |     |   |              |   |                 |   |                  |   |                |
| 4   | I didn't need it                                                         |                                                                                                                                                                                           |                                                                                                                                                                                                                                                         |   |     |   |              |   |                 |   |                  |   |                |
| 5   | Not applicable                                                           |                                                                                                                                                                                           |                                                                                                                                                                                                                                                         |   |     |   |              |   |                 |   |                  |   |                |

|     |                      |                                                                                              |                                                                                                          |
|-----|----------------------|----------------------------------------------------------------------------------------------|----------------------------------------------------------------------------------------------------------|
| 174 | bilan_clin_optthera  | ...treatment options in the case of cancer?                                                  | radio (Matrice)<br>1 No<br>2 Yes, in part<br>3 Yes, absolutely<br>4 I didn't need it<br>5 Not applicable |
| 175 | bilan_clin_reducrisq | ...ways to reduce the risk in carriers of a gene mutation that increases the risk of cancer? | radio (Matrice)<br>1 No<br>2 Yes, in part<br>3 Yes, absolutely<br>4 I didn't need it<br>5 Not applicable |
| 176 | bilan_clin_options   | ...surgical and reconstructive options in the case of cancer?                                | radio (Matrice)<br>1 No<br>2 Yes, in part<br>3 Yes, absolutely<br>4 I didn't need it<br>5 Not applicable |
| 177 | bilan_clin_proth     | ...breast implants?                                                                          | radio (Matrice)<br>1 No<br>2 Yes, in part<br>3 Yes, absolutely<br>4 I didn't need it<br>5 Not applicable |
| 178 | bilan_clin_hormo     | ...hormonal issues?                                                                          | radio (Matrice)<br>1 No<br>2 Yes, in part<br>3 Yes, absolutely<br>4 I didn't need it<br>5 Not applicable |
| 179 | bilan_clin_repro     | ...reproductive issues?                                                                      | radio (Matrice)<br>1 No<br>2 Yes, in part<br>3 Yes, absolutely<br>4 I didn't need it<br>5 Not applicable |
| 180 | bilan_clin_fatig     | ...fatigue following treatments?                                                             | radio (Matrice)<br>1 No<br>2 Yes, in part<br>3 Yes, absolutely<br>4 I didn't need it<br>5 Not applicable |
| 181 | bilan_clin_doulchir  | ...pain and discomfort after surgery?                                                        | radio (Matrice)<br>1 No<br>2 Yes, in part<br>3 Yes, absolutely<br>4 I didn't need it<br>5 Not applicable |

|     |                                                                                     |                                                                                                                                                               |                                                                                                                                                                                                                                                                |   |    |   |              |   |                 |   |                  |   |                |
|-----|-------------------------------------------------------------------------------------|---------------------------------------------------------------------------------------------------------------------------------------------------------------|----------------------------------------------------------------------------------------------------------------------------------------------------------------------------------------------------------------------------------------------------------------|---|----|---|--------------|---|-----------------|---|------------------|---|----------------|
| 182 | bilan_clin_doultrait                                                                | ...pain and discomfort after treatment?                                                                                                                       | <p>radio (Matrice)</p> <table border="1"> <tr><td>1</td><td>No</td></tr> <tr><td>2</td><td>Yes, in part</td></tr> <tr><td>3</td><td>Yes, absolutely</td></tr> <tr><td>4</td><td>I didn't need it</td></tr> <tr><td>5</td><td>Not applicable</td></tr> </table> | 1 | No | 2 | Yes, in part | 3 | Yes, absolutely | 4 | I didn't need it | 5 | Not applicable |
| 1   | No                                                                                  |                                                                                                                                                               |                                                                                                                                                                                                                                                                |   |    |   |              |   |                 |   |                  |   |                |
| 2   | Yes, in part                                                                        |                                                                                                                                                               |                                                                                                                                                                                                                                                                |   |    |   |              |   |                 |   |                  |   |                |
| 3   | Yes, absolutely                                                                     |                                                                                                                                                               |                                                                                                                                                                                                                                                                |   |    |   |              |   |                 |   |                  |   |                |
| 4   | I didn't need it                                                                    |                                                                                                                                                               |                                                                                                                                                                                                                                                                |   |    |   |              |   |                 |   |                  |   |                |
| 5   | Not applicable                                                                      |                                                                                                                                                               |                                                                                                                                                                                                                                                                |   |    |   |              |   |                 |   |                  |   |                |
| 183 | bilan_clin_emot                                                                     | ...the possible emotions?                                                                                                                                     | <p>radio (Matrice)</p> <table border="1"> <tr><td>1</td><td>No</td></tr> <tr><td>2</td><td>Yes, in part</td></tr> <tr><td>3</td><td>Yes, absolutely</td></tr> <tr><td>4</td><td>I didn't need it</td></tr> <tr><td>5</td><td>Not applicable</td></tr> </table> | 1 | No | 2 | Yes, in part | 3 | Yes, absolutely | 4 | I didn't need it | 5 | Not applicable |
| 1   | No                                                                                  |                                                                                                                                                               |                                                                                                                                                                                                                                                                |   |    |   |              |   |                 |   |                  |   |                |
| 2   | Yes, in part                                                                        |                                                                                                                                                               |                                                                                                                                                                                                                                                                |   |    |   |              |   |                 |   |                  |   |                |
| 3   | Yes, absolutely                                                                     |                                                                                                                                                               |                                                                                                                                                                                                                                                                |   |    |   |              |   |                 |   |                  |   |                |
| 4   | I didn't need it                                                                    |                                                                                                                                                               |                                                                                                                                                                                                                                                                |   |    |   |              |   |                 |   |                  |   |                |
| 5   | Not applicable                                                                      |                                                                                                                                                               |                                                                                                                                                                                                                                                                |   |    |   |              |   |                 |   |                  |   |                |
| 184 | bilan_clin_stress                                                                   | ...stress and anxiety management?                                                                                                                             | <p>radio (Matrice)</p> <table border="1"> <tr><td>1</td><td>No</td></tr> <tr><td>2</td><td>Yes, in part</td></tr> <tr><td>3</td><td>Yes, absolutely</td></tr> <tr><td>4</td><td>I didn't need it</td></tr> <tr><td>5</td><td>Not applicable</td></tr> </table> | 1 | No | 2 | Yes, in part | 3 | Yes, absolutely | 4 | I didn't need it | 5 | Not applicable |
| 1   | No                                                                                  |                                                                                                                                                               |                                                                                                                                                                                                                                                                |   |    |   |              |   |                 |   |                  |   |                |
| 2   | Yes, in part                                                                        |                                                                                                                                                               |                                                                                                                                                                                                                                                                |   |    |   |              |   |                 |   |                  |   |                |
| 3   | Yes, absolutely                                                                     |                                                                                                                                                               |                                                                                                                                                                                                                                                                |   |    |   |              |   |                 |   |                  |   |                |
| 4   | I didn't need it                                                                    |                                                                                                                                                               |                                                                                                                                                                                                                                                                |   |    |   |              |   |                 |   |                  |   |                |
| 5   | Not applicable                                                                      |                                                                                                                                                               |                                                                                                                                                                                                                                                                |   |    |   |              |   |                 |   |                  |   |                |
| 185 | bilan_clin_appar                                                                    | ...the impact on physical appearance and self-esteem?                                                                                                         | <p>radio (Matrice)</p> <table border="1"> <tr><td>1</td><td>No</td></tr> <tr><td>2</td><td>Yes, in part</td></tr> <tr><td>3</td><td>Yes, absolutely</td></tr> <tr><td>4</td><td>I didn't need it</td></tr> <tr><td>5</td><td>Not applicable</td></tr> </table> | 1 | No | 2 | Yes, in part | 3 | Yes, absolutely | 4 | I didn't need it | 5 | Not applicable |
| 1   | No                                                                                  |                                                                                                                                                               |                                                                                                                                                                                                                                                                |   |    |   |              |   |                 |   |                  |   |                |
| 2   | Yes, in part                                                                        |                                                                                                                                                               |                                                                                                                                                                                                                                                                |   |    |   |              |   |                 |   |                  |   |                |
| 3   | Yes, absolutely                                                                     |                                                                                                                                                               |                                                                                                                                                                                                                                                                |   |    |   |              |   |                 |   |                  |   |                |
| 4   | I didn't need it                                                                    |                                                                                                                                                               |                                                                                                                                                                                                                                                                |   |    |   |              |   |                 |   |                  |   |                |
| 5   | Not applicable                                                                      |                                                                                                                                                               |                                                                                                                                                                                                                                                                |   |    |   |              |   |                 |   |                  |   |                |
| 186 | bilan_clin_procdecis                                                                | ...decision-making processes?                                                                                                                                 | <p>radio (Matrice)</p> <table border="1"> <tr><td>1</td><td>No</td></tr> <tr><td>2</td><td>Yes, in part</td></tr> <tr><td>3</td><td>Yes, absolutely</td></tr> <tr><td>4</td><td>I didn't need it</td></tr> <tr><td>5</td><td>Not applicable</td></tr> </table> | 1 | No | 2 | Yes, in part | 3 | Yes, absolutely | 4 | I didn't need it | 5 | Not applicable |
| 1   | No                                                                                  |                                                                                                                                                               |                                                                                                                                                                                                                                                                |   |    |   |              |   |                 |   |                  |   |                |
| 2   | Yes, in part                                                                        |                                                                                                                                                               |                                                                                                                                                                                                                                                                |   |    |   |              |   |                 |   |                  |   |                |
| 3   | Yes, absolutely                                                                     |                                                                                                                                                               |                                                                                                                                                                                                                                                                |   |    |   |              |   |                 |   |                  |   |                |
| 4   | I didn't need it                                                                    |                                                                                                                                                               |                                                                                                                                                                                                                                                                |   |    |   |              |   |                 |   |                  |   |                |
| 5   | Not applicable                                                                      |                                                                                                                                                               |                                                                                                                                                                                                                                                                |   |    |   |              |   |                 |   |                  |   |                |
| 187 | bilan_clin_urin                                                                     | ...urinary and erectile dysfunction issues?                                                                                                                   | <p>radio (Matrice)</p> <table border="1"> <tr><td>1</td><td>No</td></tr> <tr><td>2</td><td>Yes, in part</td></tr> <tr><td>3</td><td>Yes, absolutely</td></tr> <tr><td>4</td><td>I didn't need it</td></tr> <tr><td>5</td><td>Not applicable</td></tr> </table> | 1 | No | 2 | Yes, in part | 3 | Yes, absolutely | 4 | I didn't need it | 5 | Not applicable |
| 1   | No                                                                                  |                                                                                                                                                               |                                                                                                                                                                                                                                                                |   |    |   |              |   |                 |   |                  |   |                |
| 2   | Yes, in part                                                                        |                                                                                                                                                               |                                                                                                                                                                                                                                                                |   |    |   |              |   |                 |   |                  |   |                |
| 3   | Yes, absolutely                                                                     |                                                                                                                                                               |                                                                                                                                                                                                                                                                |   |    |   |              |   |                 |   |                  |   |                |
| 4   | I didn't need it                                                                    |                                                                                                                                                               |                                                                                                                                                                                                                                                                |   |    |   |              |   |                 |   |                  |   |                |
| 5   | Not applicable                                                                      |                                                                                                                                                               |                                                                                                                                                                                                                                                                |   |    |   |              |   |                 |   |                  |   |                |
| 188 | bilan_org_autre_3                                                                   | Have you received any other clinical information?                                                                                                             | <p>radio</p> <table border="1"> <tr><td>0</td><td>No</td></tr> <tr><td>1</td><td>Yes</td></tr> </table> <p>Alignement personnalisé : LH</p>                                                                                                                    | 0 | No | 1 | Yes          |   |                 |   |                  |   |                |
| 0   | No                                                                                  |                                                                                                                                                               |                                                                                                                                                                                                                                                                |   |    |   |              |   |                 |   |                  |   |                |
| 1   | Yes                                                                                 |                                                                                                                                                               |                                                                                                                                                                                                                                                                |   |    |   |              |   |                 |   |                  |   |                |
| 189 | <p>paq82_v2</p> <p>Afficher le champ UNIQUEM ENT si : [bilan_org_autre_3] = '1'</p> | If yes, please specify which ones.                                                                                                                            | <p>notes</p> <p>Alignement personnalisé : LV</p>                                                                                                                                                                                                               |   |    |   |              |   |                 |   |                  |   |                |
| 190 | bilan_quot_enf                                                                      | <p>En-tête de section : <i>Consequences on daily life Did you receive the information you needed regarding...</i></p> <p>...the consequences on children?</p> | <p>radio (Matrice)</p> <table border="1"> <tr><td>1</td><td>No</td></tr> <tr><td>2</td><td>Yes, in part</td></tr> <tr><td>3</td><td>Yes, absolutely</td></tr> <tr><td>4</td><td>I didn't need it</td></tr> <tr><td>5</td><td>Not applicable</td></tr> </table> | 1 | No | 2 | Yes, in part | 3 | Yes, absolutely | 4 | I didn't need it | 5 | Not applicable |
| 1   | No                                                                                  |                                                                                                                                                               |                                                                                                                                                                                                                                                                |   |    |   |              |   |                 |   |                  |   |                |
| 2   | Yes, in part                                                                        |                                                                                                                                                               |                                                                                                                                                                                                                                                                |   |    |   |              |   |                 |   |                  |   |                |
| 3   | Yes, absolutely                                                                     |                                                                                                                                                               |                                                                                                                                                                                                                                                                |   |    |   |              |   |                 |   |                  |   |                |
| 4   | I didn't need it                                                                    |                                                                                                                                                               |                                                                                                                                                                                                                                                                |   |    |   |              |   |                 |   |                  |   |                |
| 5   | Not applicable                                                                      |                                                                                                                                                               |                                                                                                                                                                                                                                                                |   |    |   |              |   |                 |   |                  |   |                |

|     |                    |                                            |                                                                                                          |
|-----|--------------------|--------------------------------------------|----------------------------------------------------------------------------------------------------------|
| 191 | bilan_quot_conj    | ...the consequences on conjugal life?      | radio (Matrice)<br>1 No<br>2 Yes, in part<br>3 Yes, absolutely<br>4 I didn't need it<br>5 Not applicable |
| 192 | bilan_quot_sexu    | ...the consequences on sexual life?        | radio (Matrice)<br>1 No<br>2 Yes, in part<br>3 Yes, absolutely<br>4 I didn't need it<br>5 Not applicable |
| 193 | bilan_quot_prof    | ...the consequences on professional life?  | radio (Matrice)<br>1 No<br>2 Yes, in part<br>3 Yes, absolutely<br>4 I didn't need it<br>5 Not applicable |
| 194 | bilan_quot_financ  | ...the financial consequences?             | radio (Matrice)<br>1 No<br>2 Yes, in part<br>3 Yes, absolutely<br>4 I didn't need it<br>5 Not applicable |
| 195 | bilan_quot_assur   | ...the consequences on insurance?          | radio (Matrice)<br>1 No<br>2 Yes, in part<br>3 Yes, absolutely<br>4 I didn't need it<br>5 Not applicable |
| 196 | bilan_quot_spirit  | ...the consequences on the spiritual life? | radio (Matrice)<br>1 No<br>2 Yes, in part<br>3 Yes, absolutely<br>4 I didn't need it<br>5 Not applicable |
| 197 | bilan_quot_travail | ...back to work?                           | radio (Matrice)<br>1 No<br>2 Yes, in part<br>3 Yes, absolutely<br>4 I didn't need it<br>5 Not applicable |
| 198 | bilan_quot_retquot | ...the return to daily life?               | radio (Matrice)<br>1 No<br>2 Yes, in part<br>3 Yes, absolutely<br>4 I didn't need it<br>5 Not applicable |

|     |                                                                                |                                                                                                                                                                                                                                                           |                                                                                                                                                                                                                                                            |   |       |   |              |   |                 |   |                  |   |                |
|-----|--------------------------------------------------------------------------------|-----------------------------------------------------------------------------------------------------------------------------------------------------------------------------------------------------------------------------------------------------------|------------------------------------------------------------------------------------------------------------------------------------------------------------------------------------------------------------------------------------------------------------|---|-------|---|--------------|---|-----------------|---|------------------|---|----------------|
| 199 | bilan_quot_annon                                                               | ...how to announce a diagnosis to your loved ones?                                                                                                                                                                                                        | radio (Matrice)<br><table border="1"> <tr><td>1</td><td>No</td></tr> <tr><td>2</td><td>Yes, in part</td></tr> <tr><td>3</td><td>Yes, absolutely</td></tr> <tr><td>4</td><td>I didn't need it</td></tr> <tr><td>5</td><td>Not applicable</td></tr> </table> | 1 | No    | 2 | Yes, in part | 3 | Yes, absolutely | 4 | I didn't need it | 5 | Not applicable |
| 1   | No                                                                             |                                                                                                                                                                                                                                                           |                                                                                                                                                                                                                                                            |   |       |   |              |   |                 |   |                  |   |                |
| 2   | Yes, in part                                                                   |                                                                                                                                                                                                                                                           |                                                                                                                                                                                                                                                            |   |       |   |              |   |                 |   |                  |   |                |
| 3   | Yes, absolutely                                                                |                                                                                                                                                                                                                                                           |                                                                                                                                                                                                                                                            |   |       |   |              |   |                 |   |                  |   |                |
| 4   | I didn't need it                                                               |                                                                                                                                                                                                                                                           |                                                                                                                                                                                                                                                            |   |       |   |              |   |                 |   |                  |   |                |
| 5   | Not applicable                                                                 |                                                                                                                                                                                                                                                           |                                                                                                                                                                                                                                                            |   |       |   |              |   |                 |   |                  |   |                |
| 200 | bilan_quot_percsoc                                                             | ...social perception (the reactions of others)?                                                                                                                                                                                                           | radio (Matrice)<br><table border="1"> <tr><td>1</td><td>No</td></tr> <tr><td>2</td><td>Yes, in part</td></tr> <tr><td>3</td><td>Yes, absolutely</td></tr> <tr><td>4</td><td>I didn't need it</td></tr> <tr><td>5</td><td>Not applicable</td></tr> </table> | 1 | No    | 2 | Yes, in part | 3 | Yes, absolutely | 4 | I didn't need it | 5 | Not applicable |
| 1   | No                                                                             |                                                                                                                                                                                                                                                           |                                                                                                                                                                                                                                                            |   |       |   |              |   |                 |   |                  |   |                |
| 2   | Yes, in part                                                                   |                                                                                                                                                                                                                                                           |                                                                                                                                                                                                                                                            |   |       |   |              |   |                 |   |                  |   |                |
| 3   | Yes, absolutely                                                                |                                                                                                                                                                                                                                                           |                                                                                                                                                                                                                                                            |   |       |   |              |   |                 |   |                  |   |                |
| 4   | I didn't need it                                                               |                                                                                                                                                                                                                                                           |                                                                                                                                                                                                                                                            |   |       |   |              |   |                 |   |                  |   |                |
| 5   | Not applicable                                                                 |                                                                                                                                                                                                                                                           |                                                                                                                                                                                                                                                            |   |       |   |              |   |                 |   |                  |   |                |
| 201 | bilan_quot_strat                                                               | ...strategies to live the treatments in the best conditions?                                                                                                                                                                                              | radio (Matrice)<br><table border="1"> <tr><td>1</td><td>No</td></tr> <tr><td>2</td><td>Yes, in part</td></tr> <tr><td>3</td><td>Yes, absolutely</td></tr> <tr><td>4</td><td>I didn't need it</td></tr> <tr><td>5</td><td>Not applicable</td></tr> </table> | 1 | No    | 2 | Yes, in part | 3 | Yes, absolutely | 4 | I didn't need it | 5 | Not applicable |
| 1   | No                                                                             |                                                                                                                                                                                                                                                           |                                                                                                                                                                                                                                                            |   |       |   |              |   |                 |   |                  |   |                |
| 2   | Yes, in part                                                                   |                                                                                                                                                                                                                                                           |                                                                                                                                                                                                                                                            |   |       |   |              |   |                 |   |                  |   |                |
| 3   | Yes, absolutely                                                                |                                                                                                                                                                                                                                                           |                                                                                                                                                                                                                                                            |   |       |   |              |   |                 |   |                  |   |                |
| 4   | I didn't need it                                                               |                                                                                                                                                                                                                                                           |                                                                                                                                                                                                                                                            |   |       |   |              |   |                 |   |                  |   |                |
| 5   | Not applicable                                                                 |                                                                                                                                                                                                                                                           |                                                                                                                                                                                                                                                            |   |       |   |              |   |                 |   |                  |   |                |
| 202 | bilan_quot_control                                                             | ...how to regain control over the disease?                                                                                                                                                                                                                | radio (Matrice)<br><table border="1"> <tr><td>1</td><td>No</td></tr> <tr><td>2</td><td>Yes, in part</td></tr> <tr><td>3</td><td>Yes, absolutely</td></tr> <tr><td>4</td><td>I didn't need it</td></tr> <tr><td>5</td><td>Not applicable</td></tr> </table> | 1 | No    | 2 | Yes, in part | 3 | Yes, absolutely | 4 | I didn't need it | 5 | Not applicable |
| 1   | No                                                                             |                                                                                                                                                                                                                                                           |                                                                                                                                                                                                                                                            |   |       |   |              |   |                 |   |                  |   |                |
| 2   | Yes, in part                                                                   |                                                                                                                                                                                                                                                           |                                                                                                                                                                                                                                                            |   |       |   |              |   |                 |   |                  |   |                |
| 3   | Yes, absolutely                                                                |                                                                                                                                                                                                                                                           |                                                                                                                                                                                                                                                            |   |       |   |              |   |                 |   |                  |   |                |
| 4   | I didn't need it                                                               |                                                                                                                                                                                                                                                           |                                                                                                                                                                                                                                                            |   |       |   |              |   |                 |   |                  |   |                |
| 5   | Not applicable                                                                 |                                                                                                                                                                                                                                                           |                                                                                                                                                                                                                                                            |   |       |   |              |   |                 |   |                  |   |                |
| 203 | bilan_org_autre_4                                                              | Did you receive any other information about the impact on daily life?                                                                                                                                                                                     | radio<br><table border="1"> <tr><td>0</td><td>No</td></tr> <tr><td>1</td><td>Yes</td></tr> </table><br>Alignement personnalisé : LH                                                                                                                        | 0 | No    | 1 | Yes          |   |                 |   |                  |   |                |
| 0   | No                                                                             |                                                                                                                                                                                                                                                           |                                                                                                                                                                                                                                                            |   |       |   |              |   |                 |   |                  |   |                |
| 1   | Yes                                                                            |                                                                                                                                                                                                                                                           |                                                                                                                                                                                                                                                            |   |       |   |              |   |                 |   |                  |   |                |
| 204 | paq97_v2<br>Afficher le champ UNIQUEM<br>ENT si :<br>[bilan_org_autre_4] = '1' | If yes, please specify which ones.                                                                                                                                                                                                                        | notes<br>Alignement personnalisé : LV                                                                                                                                                                                                                      |   |       |   |              |   |                 |   |                  |   |                |
| 205 | mat_info_pers_form                                                             | En-tête de section : <i>The following section aims to better understand how you communicated with the team as a patient advisor. How were you informed that you had a new request for a meeting with a patient?</i><br><br>In person, at a formal meeting | radio (Matrice)<br><table border="1"> <tr><td>1</td><td>Never</td></tr> <tr><td>2</td><td>A few times</td></tr> <tr><td>3</td><td>Usually</td></tr> <tr><td>4</td><td>Always</td></tr> </table>                                                            | 1 | Never | 2 | A few times  | 3 | Usually         | 4 | Always           |   |                |
| 1   | Never                                                                          |                                                                                                                                                                                                                                                           |                                                                                                                                                                                                                                                            |   |       |   |              |   |                 |   |                  |   |                |
| 2   | A few times                                                                    |                                                                                                                                                                                                                                                           |                                                                                                                                                                                                                                                            |   |       |   |              |   |                 |   |                  |   |                |
| 3   | Usually                                                                        |                                                                                                                                                                                                                                                           |                                                                                                                                                                                                                                                            |   |       |   |              |   |                 |   |                  |   |                |
| 4   | Always                                                                         |                                                                                                                                                                                                                                                           |                                                                                                                                                                                                                                                            |   |       |   |              |   |                 |   |                  |   |                |
| 206 | mat_info_pers_inform                                                           | In person, informally                                                                                                                                                                                                                                     | radio (Matrice)<br><table border="1"> <tr><td>1</td><td>Never</td></tr> <tr><td>2</td><td>A few times</td></tr> <tr><td>3</td><td>Usually</td></tr> <tr><td>4</td><td>Always</td></tr> </table>                                                            | 1 | Never | 2 | A few times  | 3 | Usually         | 4 | Always           |   |                |
| 1   | Never                                                                          |                                                                                                                                                                                                                                                           |                                                                                                                                                                                                                                                            |   |       |   |              |   |                 |   |                  |   |                |
| 2   | A few times                                                                    |                                                                                                                                                                                                                                                           |                                                                                                                                                                                                                                                            |   |       |   |              |   |                 |   |                  |   |                |
| 3   | Usually                                                                        |                                                                                                                                                                                                                                                           |                                                                                                                                                                                                                                                            |   |       |   |              |   |                 |   |                  |   |                |
| 4   | Always                                                                         |                                                                                                                                                                                                                                                           |                                                                                                                                                                                                                                                            |   |       |   |              |   |                 |   |                  |   |                |
| 207 | mat_info_tel                                                                   | By phone                                                                                                                                                                                                                                                  | radio (Matrice)<br><table border="1"> <tr><td>1</td><td>Never</td></tr> <tr><td>2</td><td>A few times</td></tr> <tr><td>3</td><td>Usually</td></tr> <tr><td>4</td><td>Always</td></tr> </table>                                                            | 1 | Never | 2 | A few times  | 3 | Usually         | 4 | Always           |   |                |
| 1   | Never                                                                          |                                                                                                                                                                                                                                                           |                                                                                                                                                                                                                                                            |   |       |   |              |   |                 |   |                  |   |                |
| 2   | A few times                                                                    |                                                                                                                                                                                                                                                           |                                                                                                                                                                                                                                                            |   |       |   |              |   |                 |   |                  |   |                |
| 3   | Usually                                                                        |                                                                                                                                                                                                                                                           |                                                                                                                                                                                                                                                            |   |       |   |              |   |                 |   |                  |   |                |
| 4   | Always                                                                         |                                                                                                                                                                                                                                                           |                                                                                                                                                                                                                                                            |   |       |   |              |   |                 |   |                  |   |                |
| 208 | mat_info_form                                                                  | In writing, on a dedicated form                                                                                                                                                                                                                           | radio (Matrice)<br><table border="1"> <tr><td>1</td><td>Never</td></tr> <tr><td>2</td><td>A few times</td></tr> <tr><td>3</td><td>Usually</td></tr> <tr><td>4</td><td>Always</td></tr> </table>                                                            | 1 | Never | 2 | A few times  | 3 | Usually         | 4 | Always           |   |                |
| 1   | Never                                                                          |                                                                                                                                                                                                                                                           |                                                                                                                                                                                                                                                            |   |       |   |              |   |                 |   |                  |   |                |
| 2   | A few times                                                                    |                                                                                                                                                                                                                                                           |                                                                                                                                                                                                                                                            |   |       |   |              |   |                 |   |                  |   |                |
| 3   | Usually                                                                        |                                                                                                                                                                                                                                                           |                                                                                                                                                                                                                                                            |   |       |   |              |   |                 |   |                  |   |                |
| 4   | Always                                                                         |                                                                                                                                                                                                                                                           |                                                                                                                                                                                                                                                            |   |       |   |              |   |                 |   |                  |   |                |

|     |                                                                                                    |                                                                                                                                                   |                                                                                                                                                                                                                                                      |   |                                                       |   |                                                                      |   |         |   |        |
|-----|----------------------------------------------------------------------------------------------------|---------------------------------------------------------------------------------------------------------------------------------------------------|------------------------------------------------------------------------------------------------------------------------------------------------------------------------------------------------------------------------------------------------------|---|-------------------------------------------------------|---|----------------------------------------------------------------------|---|---------|---|--------|
| 209 | mat_info_courri                                                                                    | By Email                                                                                                                                          | radio (Matrice)<br><table border="1"> <tr><td>1</td><td>Never</td></tr> <tr><td>2</td><td>A few times</td></tr> <tr><td>3</td><td>Usually</td></tr> <tr><td>4</td><td>Always</td></tr> </table>                                                      | 1 | Never                                                 | 2 | A few times                                                          | 3 | Usually | 4 | Always |
| 1   | Never                                                                                              |                                                                                                                                                   |                                                                                                                                                                                                                                                      |   |                                                       |   |                                                                      |   |         |   |        |
| 2   | A few times                                                                                        |                                                                                                                                                   |                                                                                                                                                                                                                                                      |   |                                                       |   |                                                                      |   |         |   |        |
| 3   | Usually                                                                                            |                                                                                                                                                   |                                                                                                                                                                                                                                                      |   |                                                       |   |                                                                      |   |         |   |        |
| 4   | Always                                                                                             |                                                                                                                                                   |                                                                                                                                                                                                                                                      |   |                                                       |   |                                                                      |   |         |   |        |
| 210 | paq105_v2                                                                                          | If another means was used, please specify which one, otherwise leave the box blank.                                                               | notes<br>Alignement personnalisé : LV                                                                                                                                                                                                                |   |                                                       |   |                                                                      |   |         |   |        |
| 211 | paq106_v2                                                                                          | Did you follow up with a member of the care team following your accompaniment?                                                                    | radio<br><table border="1"> <tr><td>1</td><td>Yes, systematically</td></tr> <tr><td>2</td><td>Yes, only if there were important elements to bring back to the team</td></tr> <tr><td>3</td><td>No</td></tr> </table><br>Alignement personnalisé : LV | 1 | Yes, systematically                                   | 2 | Yes, only if there were important elements to bring back to the team | 3 | No      |   |        |
| 1   | Yes, systematically                                                                                |                                                                                                                                                   |                                                                                                                                                                                                                                                      |   |                                                       |   |                                                                      |   |         |   |        |
| 2   | Yes, only if there were important elements to bring back to the team                               |                                                                                                                                                   |                                                                                                                                                                                                                                                      |   |                                                       |   |                                                                      |   |         |   |        |
| 3   | No                                                                                                 |                                                                                                                                                   |                                                                                                                                                                                                                                                      |   |                                                       |   |                                                                      |   |         |   |        |
| 212 | bilan_suivi_acc<br>Afficher le champ UNIQUEM ENT si : [paq106_v2] = '1' or [paq106_v2] = '2'       | If yes, how did you follow up on your accompaniments with the health care team?                                                                   | descriptive<br><table border="1"> <tr><td>1</td><td>Jamais 2, Quelques fois 3, Habituellement 4, Toujours</td></tr> </table>                                                                                                                         | 1 | Jamais 2, Quelques fois 3, Habituellement 4, Toujours |   |                                                                      |   |         |   |        |
| 1   | Jamais 2, Quelques fois 3, Habituellement 4, Toujours                                              |                                                                                                                                                   |                                                                                                                                                                                                                                                      |   |                                                       |   |                                                                      |   |         |   |        |
| 213 | mat_suivi_pers_form<br>Afficher le champ UNIQUEM ENT si : [paq106_v2] = '1' or [paq106_v2] = '2'   | In person, at a formal meeting                                                                                                                    | radio (Matrice)<br><table border="1"> <tr><td>1</td><td>Never</td></tr> <tr><td>2</td><td>A few times</td></tr> <tr><td>3</td><td>Usually</td></tr> <tr><td>4</td><td>Always</td></tr> </table>                                                      | 1 | Never                                                 | 2 | A few times                                                          | 3 | Usually | 4 | Always |
| 1   | Never                                                                                              |                                                                                                                                                   |                                                                                                                                                                                                                                                      |   |                                                       |   |                                                                      |   |         |   |        |
| 2   | A few times                                                                                        |                                                                                                                                                   |                                                                                                                                                                                                                                                      |   |                                                       |   |                                                                      |   |         |   |        |
| 3   | Usually                                                                                            |                                                                                                                                                   |                                                                                                                                                                                                                                                      |   |                                                       |   |                                                                      |   |         |   |        |
| 4   | Always                                                                                             |                                                                                                                                                   |                                                                                                                                                                                                                                                      |   |                                                       |   |                                                                      |   |         |   |        |
| 214 | mat_suivi_pers_inform<br>Afficher le champ UNIQUEM ENT si : [paq106_v2] = '1' or [paq106_v2] = '2' | In person, informally                                                                                                                             | radio (Matrice)<br><table border="1"> <tr><td>1</td><td>Never</td></tr> <tr><td>2</td><td>A few times</td></tr> <tr><td>3</td><td>Usually</td></tr> <tr><td>4</td><td>Always</td></tr> </table>                                                      | 1 | Never                                                 | 2 | A few times                                                          | 3 | Usually | 4 | Always |
| 1   | Never                                                                                              |                                                                                                                                                   |                                                                                                                                                                                                                                                      |   |                                                       |   |                                                                      |   |         |   |        |
| 2   | A few times                                                                                        |                                                                                                                                                   |                                                                                                                                                                                                                                                      |   |                                                       |   |                                                                      |   |         |   |        |
| 3   | Usually                                                                                            |                                                                                                                                                   |                                                                                                                                                                                                                                                      |   |                                                       |   |                                                                      |   |         |   |        |
| 4   | Always                                                                                             |                                                                                                                                                   |                                                                                                                                                                                                                                                      |   |                                                       |   |                                                                      |   |         |   |        |
| 215 | mat_suivi_tel<br>Afficher le champ UNIQUEM ENT si : [paq106_v2] = '1' or [paq106_v2] = '2'         | By phone                                                                                                                                          | radio (Matrice)<br><table border="1"> <tr><td>1</td><td>Never</td></tr> <tr><td>2</td><td>A few times</td></tr> <tr><td>3</td><td>Usually</td></tr> <tr><td>4</td><td>Always</td></tr> </table>                                                      | 1 | Never                                                 | 2 | A few times                                                          | 3 | Usually | 4 | Always |
| 1   | Never                                                                                              |                                                                                                                                                   |                                                                                                                                                                                                                                                      |   |                                                       |   |                                                                      |   |         |   |        |
| 2   | A few times                                                                                        |                                                                                                                                                   |                                                                                                                                                                                                                                                      |   |                                                       |   |                                                                      |   |         |   |        |
| 3   | Usually                                                                                            |                                                                                                                                                   |                                                                                                                                                                                                                                                      |   |                                                       |   |                                                                      |   |         |   |        |
| 4   | Always                                                                                             |                                                                                                                                                   |                                                                                                                                                                                                                                                      |   |                                                       |   |                                                                      |   |         |   |        |
| 216 | mat_suivi_form<br>Afficher le champ UNIQUEM ENT si : [paq106_v2] = '1' or [paq106_v2] = '2'        | In writing, on a dedicated form                                                                                                                   | radio (Matrice)<br><table border="1"> <tr><td>1</td><td>Never</td></tr> <tr><td>2</td><td>A few times</td></tr> <tr><td>3</td><td>Usually</td></tr> <tr><td>4</td><td>Always</td></tr> </table>                                                      | 1 | Never                                                 | 2 | A few times                                                          | 3 | Usually | 4 | Always |
| 1   | Never                                                                                              |                                                                                                                                                   |                                                                                                                                                                                                                                                      |   |                                                       |   |                                                                      |   |         |   |        |
| 2   | A few times                                                                                        |                                                                                                                                                   |                                                                                                                                                                                                                                                      |   |                                                       |   |                                                                      |   |         |   |        |
| 3   | Usually                                                                                            |                                                                                                                                                   |                                                                                                                                                                                                                                                      |   |                                                       |   |                                                                      |   |         |   |        |
| 4   | Always                                                                                             |                                                                                                                                                   |                                                                                                                                                                                                                                                      |   |                                                       |   |                                                                      |   |         |   |        |
| 217 | mat_suivi_courri<br>Afficher le champ UNIQUEM ENT si : [paq106_v2] = '1' or [paq106_v2] = '2'      | By Email                                                                                                                                          | radio (Matrice)<br><table border="1"> <tr><td>1</td><td>Never</td></tr> <tr><td>2</td><td>A few times</td></tr> <tr><td>3</td><td>Usually</td></tr> <tr><td>4</td><td>Always</td></tr> </table>                                                      | 1 | Never                                                 | 2 | A few times                                                          | 3 | Usually | 4 | Always |
| 1   | Never                                                                                              |                                                                                                                                                   |                                                                                                                                                                                                                                                      |   |                                                       |   |                                                                      |   |         |   |        |
| 2   | A few times                                                                                        |                                                                                                                                                   |                                                                                                                                                                                                                                                      |   |                                                       |   |                                                                      |   |         |   |        |
| 3   | Usually                                                                                            |                                                                                                                                                   |                                                                                                                                                                                                                                                      |   |                                                       |   |                                                                      |   |         |   |        |
| 4   | Always                                                                                             |                                                                                                                                                   |                                                                                                                                                                                                                                                      |   |                                                       |   |                                                                      |   |         |   |        |
| 218 | paq112_v2<br>Afficher le champ UNIQUEM ENT si : [paq106_v2] = '1' or [paq106_v2] = '2'             | If another means was used, please specify which one, otherwise leave the box blank.                                                               | notes<br>Alignement personnalisé : LV                                                                                                                                                                                                                |   |                                                       |   |                                                                      |   |         |   |        |
| 219 | mat_premier_bur                                                                                    | En-tête de section : <i>How did you make the first contact with the patients?</i><br>In person, in a dedicated office in the health care facility | radio (Matrice)<br><table border="1"> <tr><td>1</td><td>Never</td></tr> <tr><td>2</td><td>A few times</td></tr> <tr><td>3</td><td>Usually</td></tr> <tr><td>4</td><td>Always</td></tr> </table>                                                      | 1 | Never                                                 | 2 | A few times                                                          | 3 | Usually | 4 | Always |
| 1   | Never                                                                                              |                                                                                                                                                   |                                                                                                                                                                                                                                                      |   |                                                       |   |                                                                      |   |         |   |        |
| 2   | A few times                                                                                        |                                                                                                                                                   |                                                                                                                                                                                                                                                      |   |                                                       |   |                                                                      |   |         |   |        |
| 3   | Usually                                                                                            |                                                                                                                                                   |                                                                                                                                                                                                                                                      |   |                                                       |   |                                                                      |   |         |   |        |
| 4   | Always                                                                                             |                                                                                                                                                   |                                                                                                                                                                                                                                                      |   |                                                       |   |                                                                      |   |         |   |        |

|     |                        |                                                                                                                                       |                                                                      |
|-----|------------------------|---------------------------------------------------------------------------------------------------------------------------------------|----------------------------------------------------------------------|
| 220 | mat_premier_etab_autre | In person, at another location in the health care facility                                                                            | radio (Matrice)<br>1 Never<br>2 A few times<br>3 Usually<br>4 Always |
| 221 | mat_premier_ext        | In person, outside the health care facility                                                                                           | radio (Matrice)<br>1 Never<br>2 A few times<br>3 Usually<br>4 Always |
| 222 | mat_premier_tel        | By phone                                                                                                                              | radio (Matrice)<br>1 Never<br>2 A few times<br>3 Usually<br>4 Always |
| 223 | mat_premier_reacts     | By secure teleconference (Reacts)                                                                                                     | radio (Matrice)<br>1 Never<br>2 A few times<br>3 Usually<br>4 Always |
| 224 | paq118_v2              | If another means was used, please specify which one, otherwise leave the box blank.                                                   | notes<br>Alignement personnalisé : LV                                |
| 225 | mat_interv_bur         | En-tête de section : <i>How did you carry out your interventions?</i><br>In person, in a dedicated office in the health care facility | radio (Matrice)<br>1 Never<br>2 A few times<br>3 Usually<br>4 Always |
| 226 | mat_interv_etab_autre  | In person, at another location in the health care facility                                                                            | radio (Matrice)<br>1 Never<br>2 A few times<br>3 Usually<br>4 Always |
| 227 | mat_interv_rdv         | In person, at a medical appointment                                                                                                   | radio (Matrice)<br>1 Never<br>2 A few times<br>3 Usually<br>4 Always |
| 228 | mat_interv_ext         | In person, outside the health care facility                                                                                           | radio (Matrice)<br>1 Never<br>2 A few times<br>3 Usually<br>4 Always |
| 229 | mat_interv_tel         | By phone                                                                                                                              | radio (Matrice)<br>1 Never<br>2 A few times<br>3 Usually<br>4 Always |
| 230 | mat_interv_reacts      | By secure teleconference (Reacts)                                                                                                     | radio (Matrice)<br>1 Never<br>2 A few times<br>3 Usually<br>4 Always |

|    |                                                                                      |                                                                                                                                                                                                                                                                                                                                  |                                                                                                                                                                                                                                                                                                                                                                                                                                                                                                                                                                                                                                                                                                                                                                                                                                                                                                                                                                                                                                                                                                                                                                                                                                                                                                                                                                                                                                                                                                                                                                                                                                                                                                                                                                                                                                                                                                                                            |   |              |                    |    |              |                |   |              |                     |   |              |                                                                                |   |              |                                                                    |   |              |                                                                                    |   |              |                                 |   |              |                                                |   |              |                                               |    |               |                                                    |    |               |                                               |    |               |                                              |    |               |                                                                                   |    |               |                                                             |    |               |                          |    |               |                                            |    |               |                                                                                |
|----|--------------------------------------------------------------------------------------|----------------------------------------------------------------------------------------------------------------------------------------------------------------------------------------------------------------------------------------------------------------------------------------------------------------------------------|--------------------------------------------------------------------------------------------------------------------------------------------------------------------------------------------------------------------------------------------------------------------------------------------------------------------------------------------------------------------------------------------------------------------------------------------------------------------------------------------------------------------------------------------------------------------------------------------------------------------------------------------------------------------------------------------------------------------------------------------------------------------------------------------------------------------------------------------------------------------------------------------------------------------------------------------------------------------------------------------------------------------------------------------------------------------------------------------------------------------------------------------------------------------------------------------------------------------------------------------------------------------------------------------------------------------------------------------------------------------------------------------------------------------------------------------------------------------------------------------------------------------------------------------------------------------------------------------------------------------------------------------------------------------------------------------------------------------------------------------------------------------------------------------------------------------------------------------------------------------------------------------------------------------------------------------|---|--------------|--------------------|----|--------------|----------------|---|--------------|---------------------|---|--------------|--------------------------------------------------------------------------------|---|--------------|--------------------------------------------------------------------|---|--------------|------------------------------------------------------------------------------------|---|--------------|---------------------------------|---|--------------|------------------------------------------------|---|--------------|-----------------------------------------------|----|---------------|----------------------------------------------------|----|---------------|-----------------------------------------------|----|---------------|----------------------------------------------|----|---------------|-----------------------------------------------------------------------------------|----|---------------|-------------------------------------------------------------|----|---------------|--------------------------|----|---------------|--------------------------------------------|----|---------------|--------------------------------------------------------------------------------|
|    | 231 paq125_v2                                                                        | If another means was used, please specify which one, otherwise leave the box blank.                                                                                                                                                                                                                                              | notes<br>Alignement personnalisé : LV                                                                                                                                                                                                                                                                                                                                                                                                                                                                                                                                                                                                                                                                                                                                                                                                                                                                                                                                                                                                                                                                                                                                                                                                                                                                                                                                                                                                                                                                                                                                                                                                                                                                                                                                                                                                                                                                                                      |   |              |                    |    |              |                |   |              |                     |   |              |                                                                                |   |              |                                                                    |   |              |                                                                                    |   |              |                                 |   |              |                                                |   |              |                                               |    |               |                                                    |    |               |                                               |    |               |                                              |    |               |                                                                                   |    |               |                                                             |    |               |                          |    |               |                                            |    |               |                                                                                |
|    | 232 paq126_v2                                                                        | <p>En-tête de section : <i>DOCUMENTATION OF THE CONTRIBUTION OF THE PATIENT ADVISOR</i></p> <p>The purpose of this section is to document the contribution of the patient advisor in the care trajectory of the accompanied patient. In your opinion, what is the contribution of the patient advisor? Check all that apply.</p> | <p>checkbox</p> <table border="1" data-bbox="1026 174 1487 1406"> <tr> <td>1</td> <td>paq126_v2__1</td> <td>Giving information</td> </tr> <tr> <td>2</td> <td>paq126_v2__2</td> <td>Giving support</td> </tr> <tr> <td>3</td> <td>paq126_v2__3</td> <td>Sharing experiences</td> </tr> <tr> <td>4</td> <td>paq126_v2__4</td> <td>Facilitate communication between the health care team and the patient advisor.</td> </tr> <tr> <td>5</td> <td>paq126_v2__5</td> <td>Helping to bring the patient's perspective to the health care team</td> </tr> <tr> <td>6</td> <td>paq126_v2__6</td> <td>Improving understanding of information shared between patient and health care team</td> </tr> <tr> <td>7</td> <td>paq126_v2__7</td> <td>Helping to remember information</td> </tr> <tr> <td>8</td> <td>paq126_v2__8</td> <td>Preparing the patient for medical appointments</td> </tr> <tr> <td>9</td> <td>paq126_v2__9</td> <td>Accompanying patients to medical appointments</td> </tr> <tr> <td>10</td> <td>paq126_v2__10</td> <td>Helping the patient participate in decision making</td> </tr> <tr> <td>11</td> <td>paq126_v2__11</td> <td>Bringing a new perspective to decision making</td> </tr> <tr> <td>12</td> <td>paq126_v2__12</td> <td>Referring patients to a variety of resources</td> </tr> <tr> <td>13</td> <td>paq126_v2__13</td> <td>Help develop a trusting relationship between the patient and the health care team</td> </tr> <tr> <td>14</td> <td>paq126_v2__14</td> <td>Helping the patient become a partner in his or her own care</td> </tr> <tr> <td>15</td> <td>paq126_v2__15</td> <td>Listening to the patient</td> </tr> <tr> <td>16</td> <td>paq126_v2__16</td> <td>Other contributions, Please specify below.</td> </tr> <tr> <td>17</td> <td>paq126_v2__17</td> <td>No, the patient advisor has no particular contribution to the care trajectory.</td> </tr> </table> <p>Alignement personnalisé : LV</p> | 1 | paq126_v2__1 | Giving information | 2  | paq126_v2__2 | Giving support | 3 | paq126_v2__3 | Sharing experiences | 4 | paq126_v2__4 | Facilitate communication between the health care team and the patient advisor. | 5 | paq126_v2__5 | Helping to bring the patient's perspective to the health care team | 6 | paq126_v2__6 | Improving understanding of information shared between patient and health care team | 7 | paq126_v2__7 | Helping to remember information | 8 | paq126_v2__8 | Preparing the patient for medical appointments | 9 | paq126_v2__9 | Accompanying patients to medical appointments | 10 | paq126_v2__10 | Helping the patient participate in decision making | 11 | paq126_v2__11 | Bringing a new perspective to decision making | 12 | paq126_v2__12 | Referring patients to a variety of resources | 13 | paq126_v2__13 | Help develop a trusting relationship between the patient and the health care team | 14 | paq126_v2__14 | Helping the patient become a partner in his or her own care | 15 | paq126_v2__15 | Listening to the patient | 16 | paq126_v2__16 | Other contributions, Please specify below. | 17 | paq126_v2__17 | No, the patient advisor has no particular contribution to the care trajectory. |
| 1  | paq126_v2__1                                                                         | Giving information                                                                                                                                                                                                                                                                                                               |                                                                                                                                                                                                                                                                                                                                                                                                                                                                                                                                                                                                                                                                                                                                                                                                                                                                                                                                                                                                                                                                                                                                                                                                                                                                                                                                                                                                                                                                                                                                                                                                                                                                                                                                                                                                                                                                                                                                            |   |              |                    |    |              |                |   |              |                     |   |              |                                                                                |   |              |                                                                    |   |              |                                                                                    |   |              |                                 |   |              |                                                |   |              |                                               |    |               |                                                    |    |               |                                               |    |               |                                              |    |               |                                                                                   |    |               |                                                             |    |               |                          |    |               |                                            |    |               |                                                                                |
| 2  | paq126_v2__2                                                                         | Giving support                                                                                                                                                                                                                                                                                                                   |                                                                                                                                                                                                                                                                                                                                                                                                                                                                                                                                                                                                                                                                                                                                                                                                                                                                                                                                                                                                                                                                                                                                                                                                                                                                                                                                                                                                                                                                                                                                                                                                                                                                                                                                                                                                                                                                                                                                            |   |              |                    |    |              |                |   |              |                     |   |              |                                                                                |   |              |                                                                    |   |              |                                                                                    |   |              |                                 |   |              |                                                |   |              |                                               |    |               |                                                    |    |               |                                               |    |               |                                              |    |               |                                                                                   |    |               |                                                             |    |               |                          |    |               |                                            |    |               |                                                                                |
| 3  | paq126_v2__3                                                                         | Sharing experiences                                                                                                                                                                                                                                                                                                              |                                                                                                                                                                                                                                                                                                                                                                                                                                                                                                                                                                                                                                                                                                                                                                                                                                                                                                                                                                                                                                                                                                                                                                                                                                                                                                                                                                                                                                                                                                                                                                                                                                                                                                                                                                                                                                                                                                                                            |   |              |                    |    |              |                |   |              |                     |   |              |                                                                                |   |              |                                                                    |   |              |                                                                                    |   |              |                                 |   |              |                                                |   |              |                                               |    |               |                                                    |    |               |                                               |    |               |                                              |    |               |                                                                                   |    |               |                                                             |    |               |                          |    |               |                                            |    |               |                                                                                |
| 4  | paq126_v2__4                                                                         | Facilitate communication between the health care team and the patient advisor.                                                                                                                                                                                                                                                   |                                                                                                                                                                                                                                                                                                                                                                                                                                                                                                                                                                                                                                                                                                                                                                                                                                                                                                                                                                                                                                                                                                                                                                                                                                                                                                                                                                                                                                                                                                                                                                                                                                                                                                                                                                                                                                                                                                                                            |   |              |                    |    |              |                |   |              |                     |   |              |                                                                                |   |              |                                                                    |   |              |                                                                                    |   |              |                                 |   |              |                                                |   |              |                                               |    |               |                                                    |    |               |                                               |    |               |                                              |    |               |                                                                                   |    |               |                                                             |    |               |                          |    |               |                                            |    |               |                                                                                |
| 5  | paq126_v2__5                                                                         | Helping to bring the patient's perspective to the health care team                                                                                                                                                                                                                                                               |                                                                                                                                                                                                                                                                                                                                                                                                                                                                                                                                                                                                                                                                                                                                                                                                                                                                                                                                                                                                                                                                                                                                                                                                                                                                                                                                                                                                                                                                                                                                                                                                                                                                                                                                                                                                                                                                                                                                            |   |              |                    |    |              |                |   |              |                     |   |              |                                                                                |   |              |                                                                    |   |              |                                                                                    |   |              |                                 |   |              |                                                |   |              |                                               |    |               |                                                    |    |               |                                               |    |               |                                              |    |               |                                                                                   |    |               |                                                             |    |               |                          |    |               |                                            |    |               |                                                                                |
| 6  | paq126_v2__6                                                                         | Improving understanding of information shared between patient and health care team                                                                                                                                                                                                                                               |                                                                                                                                                                                                                                                                                                                                                                                                                                                                                                                                                                                                                                                                                                                                                                                                                                                                                                                                                                                                                                                                                                                                                                                                                                                                                                                                                                                                                                                                                                                                                                                                                                                                                                                                                                                                                                                                                                                                            |   |              |                    |    |              |                |   |              |                     |   |              |                                                                                |   |              |                                                                    |   |              |                                                                                    |   |              |                                 |   |              |                                                |   |              |                                               |    |               |                                                    |    |               |                                               |    |               |                                              |    |               |                                                                                   |    |               |                                                             |    |               |                          |    |               |                                            |    |               |                                                                                |
| 7  | paq126_v2__7                                                                         | Helping to remember information                                                                                                                                                                                                                                                                                                  |                                                                                                                                                                                                                                                                                                                                                                                                                                                                                                                                                                                                                                                                                                                                                                                                                                                                                                                                                                                                                                                                                                                                                                                                                                                                                                                                                                                                                                                                                                                                                                                                                                                                                                                                                                                                                                                                                                                                            |   |              |                    |    |              |                |   |              |                     |   |              |                                                                                |   |              |                                                                    |   |              |                                                                                    |   |              |                                 |   |              |                                                |   |              |                                               |    |               |                                                    |    |               |                                               |    |               |                                              |    |               |                                                                                   |    |               |                                                             |    |               |                          |    |               |                                            |    |               |                                                                                |
| 8  | paq126_v2__8                                                                         | Preparing the patient for medical appointments                                                                                                                                                                                                                                                                                   |                                                                                                                                                                                                                                                                                                                                                                                                                                                                                                                                                                                                                                                                                                                                                                                                                                                                                                                                                                                                                                                                                                                                                                                                                                                                                                                                                                                                                                                                                                                                                                                                                                                                                                                                                                                                                                                                                                                                            |   |              |                    |    |              |                |   |              |                     |   |              |                                                                                |   |              |                                                                    |   |              |                                                                                    |   |              |                                 |   |              |                                                |   |              |                                               |    |               |                                                    |    |               |                                               |    |               |                                              |    |               |                                                                                   |    |               |                                                             |    |               |                          |    |               |                                            |    |               |                                                                                |
| 9  | paq126_v2__9                                                                         | Accompanying patients to medical appointments                                                                                                                                                                                                                                                                                    |                                                                                                                                                                                                                                                                                                                                                                                                                                                                                                                                                                                                                                                                                                                                                                                                                                                                                                                                                                                                                                                                                                                                                                                                                                                                                                                                                                                                                                                                                                                                                                                                                                                                                                                                                                                                                                                                                                                                            |   |              |                    |    |              |                |   |              |                     |   |              |                                                                                |   |              |                                                                    |   |              |                                                                                    |   |              |                                 |   |              |                                                |   |              |                                               |    |               |                                                    |    |               |                                               |    |               |                                              |    |               |                                                                                   |    |               |                                                             |    |               |                          |    |               |                                            |    |               |                                                                                |
| 10 | paq126_v2__10                                                                        | Helping the patient participate in decision making                                                                                                                                                                                                                                                                               |                                                                                                                                                                                                                                                                                                                                                                                                                                                                                                                                                                                                                                                                                                                                                                                                                                                                                                                                                                                                                                                                                                                                                                                                                                                                                                                                                                                                                                                                                                                                                                                                                                                                                                                                                                                                                                                                                                                                            |   |              |                    |    |              |                |   |              |                     |   |              |                                                                                |   |              |                                                                    |   |              |                                                                                    |   |              |                                 |   |              |                                                |   |              |                                               |    |               |                                                    |    |               |                                               |    |               |                                              |    |               |                                                                                   |    |               |                                                             |    |               |                          |    |               |                                            |    |               |                                                                                |
| 11 | paq126_v2__11                                                                        | Bringing a new perspective to decision making                                                                                                                                                                                                                                                                                    |                                                                                                                                                                                                                                                                                                                                                                                                                                                                                                                                                                                                                                                                                                                                                                                                                                                                                                                                                                                                                                                                                                                                                                                                                                                                                                                                                                                                                                                                                                                                                                                                                                                                                                                                                                                                                                                                                                                                            |   |              |                    |    |              |                |   |              |                     |   |              |                                                                                |   |              |                                                                    |   |              |                                                                                    |   |              |                                 |   |              |                                                |   |              |                                               |    |               |                                                    |    |               |                                               |    |               |                                              |    |               |                                                                                   |    |               |                                                             |    |               |                          |    |               |                                            |    |               |                                                                                |
| 12 | paq126_v2__12                                                                        | Referring patients to a variety of resources                                                                                                                                                                                                                                                                                     |                                                                                                                                                                                                                                                                                                                                                                                                                                                                                                                                                                                                                                                                                                                                                                                                                                                                                                                                                                                                                                                                                                                                                                                                                                                                                                                                                                                                                                                                                                                                                                                                                                                                                                                                                                                                                                                                                                                                            |   |              |                    |    |              |                |   |              |                     |   |              |                                                                                |   |              |                                                                    |   |              |                                                                                    |   |              |                                 |   |              |                                                |   |              |                                               |    |               |                                                    |    |               |                                               |    |               |                                              |    |               |                                                                                   |    |               |                                                             |    |               |                          |    |               |                                            |    |               |                                                                                |
| 13 | paq126_v2__13                                                                        | Help develop a trusting relationship between the patient and the health care team                                                                                                                                                                                                                                                |                                                                                                                                                                                                                                                                                                                                                                                                                                                                                                                                                                                                                                                                                                                                                                                                                                                                                                                                                                                                                                                                                                                                                                                                                                                                                                                                                                                                                                                                                                                                                                                                                                                                                                                                                                                                                                                                                                                                            |   |              |                    |    |              |                |   |              |                     |   |              |                                                                                |   |              |                                                                    |   |              |                                                                                    |   |              |                                 |   |              |                                                |   |              |                                               |    |               |                                                    |    |               |                                               |    |               |                                              |    |               |                                                                                   |    |               |                                                             |    |               |                          |    |               |                                            |    |               |                                                                                |
| 14 | paq126_v2__14                                                                        | Helping the patient become a partner in his or her own care                                                                                                                                                                                                                                                                      |                                                                                                                                                                                                                                                                                                                                                                                                                                                                                                                                                                                                                                                                                                                                                                                                                                                                                                                                                                                                                                                                                                                                                                                                                                                                                                                                                                                                                                                                                                                                                                                                                                                                                                                                                                                                                                                                                                                                            |   |              |                    |    |              |                |   |              |                     |   |              |                                                                                |   |              |                                                                    |   |              |                                                                                    |   |              |                                 |   |              |                                                |   |              |                                               |    |               |                                                    |    |               |                                               |    |               |                                              |    |               |                                                                                   |    |               |                                                             |    |               |                          |    |               |                                            |    |               |                                                                                |
| 15 | paq126_v2__15                                                                        | Listening to the patient                                                                                                                                                                                                                                                                                                         |                                                                                                                                                                                                                                                                                                                                                                                                                                                                                                                                                                                                                                                                                                                                                                                                                                                                                                                                                                                                                                                                                                                                                                                                                                                                                                                                                                                                                                                                                                                                                                                                                                                                                                                                                                                                                                                                                                                                            |   |              |                    |    |              |                |   |              |                     |   |              |                                                                                |   |              |                                                                    |   |              |                                                                                    |   |              |                                 |   |              |                                                |   |              |                                               |    |               |                                                    |    |               |                                               |    |               |                                              |    |               |                                                                                   |    |               |                                                             |    |               |                          |    |               |                                            |    |               |                                                                                |
| 16 | paq126_v2__16                                                                        | Other contributions, Please specify below.                                                                                                                                                                                                                                                                                       |                                                                                                                                                                                                                                                                                                                                                                                                                                                                                                                                                                                                                                                                                                                                                                                                                                                                                                                                                                                                                                                                                                                                                                                                                                                                                                                                                                                                                                                                                                                                                                                                                                                                                                                                                                                                                                                                                                                                            |   |              |                    |    |              |                |   |              |                     |   |              |                                                                                |   |              |                                                                    |   |              |                                                                                    |   |              |                                 |   |              |                                                |   |              |                                               |    |               |                                                    |    |               |                                               |    |               |                                              |    |               |                                                                                   |    |               |                                                             |    |               |                          |    |               |                                            |    |               |                                                                                |
| 17 | paq126_v2__17                                                                        | No, the patient advisor has no particular contribution to the care trajectory.                                                                                                                                                                                                                                                   |                                                                                                                                                                                                                                                                                                                                                                                                                                                                                                                                                                                                                                                                                                                                                                                                                                                                                                                                                                                                                                                                                                                                                                                                                                                                                                                                                                                                                                                                                                                                                                                                                                                                                                                                                                                                                                                                                                                                            |   |              |                    |    |              |                |   |              |                     |   |              |                                                                                |   |              |                                                                    |   |              |                                                                                    |   |              |                                 |   |              |                                                |   |              |                                               |    |               |                                                    |    |               |                                               |    |               |                                              |    |               |                                                                                   |    |               |                                                             |    |               |                          |    |               |                                            |    |               |                                                                                |
|    | 233 pacontribuautre_v2<br>Afficher le champ UNIQUEMENT si :<br>[paq126_v2(16)] = '1' | If other contributions from the patient advisor, please specify which ones.                                                                                                                                                                                                                                                      | notes<br>Alignement personnalisé : LV                                                                                                                                                                                                                                                                                                                                                                                                                                                                                                                                                                                                                                                                                                                                                                                                                                                                                                                                                                                                                                                                                                                                                                                                                                                                                                                                                                                                                                                                                                                                                                                                                                                                                                                                                                                                                                                                                                      |   |              |                    |    |              |                |   |              |                     |   |              |                                                                                |   |              |                                                                    |   |              |                                                                                    |   |              |                                 |   |              |                                                |   |              |                                               |    |               |                                                    |    |               |                                               |    |               |                                              |    |               |                                                                                   |    |               |                                                             |    |               |                          |    |               |                                            |    |               |                                                                                |
|    | 234 paq127_v2                                                                        | <p>En-tête de section : <i>THE IMPACTS</i> The purpose of this section is to document the impacts (positive or negative) on yourself while you are involved as a patient advisor.</p> <p>Has your involvement as a patient advisor had a positive impact on you?</p>                                                             | <p>radio</p> <table border="1" data-bbox="1026 1630 1098 1709"> <tr> <td>1</td> <td>Yes</td> </tr> <tr> <td>2</td> <td>No</td> </tr> </table> <p>Alignement personnalisé : LV</p>                                                                                                                                                                                                                                                                                                                                                                                                                                                                                                                                                                                                                                                                                                                                                                                                                                                                                                                                                                                                                                                                                                                                                                                                                                                                                                                                                                                                                                                                                                                                                                                                                                                                                                                                                          | 1 | Yes          | 2                  | No |              |                |   |              |                     |   |              |                                                                                |   |              |                                                                    |   |              |                                                                                    |   |              |                                 |   |              |                                                |   |              |                                               |    |               |                                                    |    |               |                                               |    |               |                                              |    |               |                                                                                   |    |               |                                                             |    |               |                          |    |               |                                            |    |               |                                                                                |
| 1  | Yes                                                                                  |                                                                                                                                                                                                                                                                                                                                  |                                                                                                                                                                                                                                                                                                                                                                                                                                                                                                                                                                                                                                                                                                                                                                                                                                                                                                                                                                                                                                                                                                                                                                                                                                                                                                                                                                                                                                                                                                                                                                                                                                                                                                                                                                                                                                                                                                                                            |   |              |                    |    |              |                |   |              |                     |   |              |                                                                                |   |              |                                                                    |   |              |                                                                                    |   |              |                                 |   |              |                                                |   |              |                                               |    |               |                                                    |    |               |                                               |    |               |                                              |    |               |                                                                                   |    |               |                                                             |    |               |                          |    |               |                                            |    |               |                                                                                |
| 2  | No                                                                                   |                                                                                                                                                                                                                                                                                                                                  |                                                                                                                                                                                                                                                                                                                                                                                                                                                                                                                                                                                                                                                                                                                                                                                                                                                                                                                                                                                                                                                                                                                                                                                                                                                                                                                                                                                                                                                                                                                                                                                                                                                                                                                                                                                                                                                                                                                                            |   |              |                    |    |              |                |   |              |                     |   |              |                                                                                |   |              |                                                                    |   |              |                                                                                    |   |              |                                 |   |              |                                                |   |              |                                               |    |               |                                                    |    |               |                                               |    |               |                                              |    |               |                                                                                   |    |               |                                                             |    |               |                          |    |               |                                            |    |               |                                                                                |

|     |                                                                                  |                                                                                                                    |                                                                                                                                                                                                                                                                                                                                                                                                                                                                                                                                                                                                                                                                                                                                                                                                                                                                                                                                                                                              |   |                 |                                                 |                                                         |               |                                                |   |                |                                          |   |               |                                         |   |               |                                          |   |               |                       |   |               |                                  |   |               |                             |   |               |                                 |    |                |                       |
|-----|----------------------------------------------------------------------------------|--------------------------------------------------------------------------------------------------------------------|----------------------------------------------------------------------------------------------------------------------------------------------------------------------------------------------------------------------------------------------------------------------------------------------------------------------------------------------------------------------------------------------------------------------------------------------------------------------------------------------------------------------------------------------------------------------------------------------------------------------------------------------------------------------------------------------------------------------------------------------------------------------------------------------------------------------------------------------------------------------------------------------------------------------------------------------------------------------------------------------|---|-----------------|-------------------------------------------------|---------------------------------------------------------|---------------|------------------------------------------------|---|----------------|------------------------------------------|---|---------------|-----------------------------------------|---|---------------|------------------------------------------|---|---------------|-----------------------|---|---------------|----------------------------------|---|---------------|-----------------------------|---|---------------|---------------------------------|----|----------------|-----------------------|
| 235 | paq127a_v2<br>Afficher le champ UNIQUEM<br>ENT si :<br>[paq127_v2] = '1'         | If yes, what are they about?                                                                                       | checkbox<br><table border="1"> <tr> <td>1</td> <td>paq127a_v2__1</td> <td>Giving meaning to my past experience</td> </tr> <tr> <td>2</td> <td>paq127a_v2__2</td> <td>Give back to the next one what I have received</td> </tr> <tr> <td>3</td> <td>paq127a_v2__3</td> <td>Make me useful</td> </tr> <tr> <td>4</td> <td>paq127a_v2__4</td> <td>Valuing me</td> </tr> <tr> <td>5</td> <td>paq127a_v2__5</td> <td>Breaking my isolation</td> </tr> <tr> <td>6</td> <td>paq127a_v2__6</td> <td>Developing new skills</td> </tr> <tr> <td>7</td> <td>paq127a_v2__7</td> <td>Other, Please specify</td> </tr> </table><br>Alignement personnalisé : LV                                                                                                                                                                                                                                                                                                                                            | 1 | paq127a_v2__1   | Giving meaning to my past experience            | 2                                                       | paq127a_v2__2 | Give back to the next one what I have received | 3 | paq127a_v2__3  | Make me useful                           | 4 | paq127a_v2__4 | Valuing me                              | 5 | paq127a_v2__5 | Breaking my isolation                    | 6 | paq127a_v2__6 | Developing new skills | 7 | paq127a_v2__7 | Other, Please specify            |   |               |                             |   |               |                                 |    |                |                       |
| 1   | paq127a_v2__1                                                                    | Giving meaning to my past experience                                                                               |                                                                                                                                                                                                                                                                                                                                                                                                                                                                                                                                                                                                                                                                                                                                                                                                                                                                                                                                                                                              |   |                 |                                                 |                                                         |               |                                                |   |                |                                          |   |               |                                         |   |               |                                          |   |               |                       |   |               |                                  |   |               |                             |   |               |                                 |    |                |                       |
| 2   | paq127a_v2__2                                                                    | Give back to the next one what I have received                                                                     |                                                                                                                                                                                                                                                                                                                                                                                                                                                                                                                                                                                                                                                                                                                                                                                                                                                                                                                                                                                              |   |                 |                                                 |                                                         |               |                                                |   |                |                                          |   |               |                                         |   |               |                                          |   |               |                       |   |               |                                  |   |               |                             |   |               |                                 |    |                |                       |
| 3   | paq127a_v2__3                                                                    | Make me useful                                                                                                     |                                                                                                                                                                                                                                                                                                                                                                                                                                                                                                                                                                                                                                                                                                                                                                                                                                                                                                                                                                                              |   |                 |                                                 |                                                         |               |                                                |   |                |                                          |   |               |                                         |   |               |                                          |   |               |                       |   |               |                                  |   |               |                             |   |               |                                 |    |                |                       |
| 4   | paq127a_v2__4                                                                    | Valuing me                                                                                                         |                                                                                                                                                                                                                                                                                                                                                                                                                                                                                                                                                                                                                                                                                                                                                                                                                                                                                                                                                                                              |   |                 |                                                 |                                                         |               |                                                |   |                |                                          |   |               |                                         |   |               |                                          |   |               |                       |   |               |                                  |   |               |                             |   |               |                                 |    |                |                       |
| 5   | paq127a_v2__5                                                                    | Breaking my isolation                                                                                              |                                                                                                                                                                                                                                                                                                                                                                                                                                                                                                                                                                                                                                                                                                                                                                                                                                                                                                                                                                                              |   |                 |                                                 |                                                         |               |                                                |   |                |                                          |   |               |                                         |   |               |                                          |   |               |                       |   |               |                                  |   |               |                             |   |               |                                 |    |                |                       |
| 6   | paq127a_v2__6                                                                    | Developing new skills                                                                                              |                                                                                                                                                                                                                                                                                                                                                                                                                                                                                                                                                                                                                                                                                                                                                                                                                                                                                                                                                                                              |   |                 |                                                 |                                                         |               |                                                |   |                |                                          |   |               |                                         |   |               |                                          |   |               |                       |   |               |                                  |   |               |                             |   |               |                                 |    |                |                       |
| 7   | paq127a_v2__7                                                                    | Other, Please specify                                                                                              |                                                                                                                                                                                                                                                                                                                                                                                                                                                                                                                                                                                                                                                                                                                                                                                                                                                                                                                                                                                              |   |                 |                                                 |                                                         |               |                                                |   |                |                                          |   |               |                                         |   |               |                                          |   |               |                       |   |               |                                  |   |               |                             |   |               |                                 |    |                |                       |
| 236 | paimpactpo_v2<br>Afficher le champ UNIQUEM<br>ENT si :<br>[paq127a_v2(7)] = '1'  | If other, please specify which ones.                                                                               | notes<br>Alignement personnalisé : LV                                                                                                                                                                                                                                                                                                                                                                                                                                                                                                                                                                                                                                                                                                                                                                                                                                                                                                                                                        |   |                 |                                                 |                                                         |               |                                                |   |                |                                          |   |               |                                         |   |               |                                          |   |               |                       |   |               |                                  |   |               |                             |   |               |                                 |    |                |                       |
| 237 | paq128_v2                                                                        | Has your involvement as a patient advisor had a negative impact on you?                                            | radio<br><table border="1"> <tr> <td>1</td> <td>Yes</td> </tr> <tr> <td>2</td> <td>No</td> </tr> </table><br>Alignement personnalisé : LV                                                                                                                                                                                                                                                                                                                                                                                                                                                                                                                                                                                                                                                                                                                                                                                                                                                    | 1 | Yes             | 2                                               | No                                                      |               |                                                |   |                |                                          |   |               |                                         |   |               |                                          |   |               |                       |   |               |                                  |   |               |                             |   |               |                                 |    |                |                       |
| 1   | Yes                                                                              |                                                                                                                    |                                                                                                                                                                                                                                                                                                                                                                                                                                                                                                                                                                                                                                                                                                                                                                                                                                                                                                                                                                                              |   |                 |                                                 |                                                         |               |                                                |   |                |                                          |   |               |                                         |   |               |                                          |   |               |                       |   |               |                                  |   |               |                             |   |               |                                 |    |                |                       |
| 2   | No                                                                               |                                                                                                                    |                                                                                                                                                                                                                                                                                                                                                                                                                                                                                                                                                                                                                                                                                                                                                                                                                                                                                                                                                                                              |   |                 |                                                 |                                                         |               |                                                |   |                |                                          |   |               |                                         |   |               |                                          |   |               |                       |   |               |                                  |   |               |                             |   |               |                                 |    |                |                       |
| 238 | paq128a_v2<br>Afficher le champ UNIQUEM<br>ENT si :<br>[paq128_v2] = '1'         | If yes, what are they about?                                                                                       | checkbox<br><table border="1"> <tr> <td>1</td> <td>paq128a_v2__1</td> <td>Not feeling supported enough in my intervention</td> </tr> <tr> <td>2</td> <td>paq128a_v2__2</td> <td>Not having had the necessary training</td> </tr> <tr> <td>3</td> <td>paq128a_v2__3</td> <td>Not having had the necessary information</td> </tr> <tr> <td>4</td> <td>paq128a_v2__4</td> <td>Do not fully understand my contribution</td> </tr> <tr> <td>5</td> <td>paq128a_v2__5</td> <td>Not feeling part of the health care team</td> </tr> <tr> <td>6</td> <td>paq128a_v2__6</td> <td>Reliving my illness</td> </tr> <tr> <td>7</td> <td>paq128a_v2__7</td> <td>Having too many responsibilities</td> </tr> <tr> <td>8</td> <td>paq128a_v2__8</td> <td>Having too many constraints</td> </tr> <tr> <td>9</td> <td>paq128a_v2__9</td> <td>Not feeling up to the situation</td> </tr> <tr> <td>10</td> <td>paq128a_v2__10</td> <td>Other, Please specify</td> </tr> </table><br>Alignement personnalisé : LV | 1 | paq128a_v2__1   | Not feeling supported enough in my intervention | 2                                                       | paq128a_v2__2 | Not having had the necessary training          | 3 | paq128a_v2__3  | Not having had the necessary information | 4 | paq128a_v2__4 | Do not fully understand my contribution | 5 | paq128a_v2__5 | Not feeling part of the health care team | 6 | paq128a_v2__6 | Reliving my illness   | 7 | paq128a_v2__7 | Having too many responsibilities | 8 | paq128a_v2__8 | Having too many constraints | 9 | paq128a_v2__9 | Not feeling up to the situation | 10 | paq128a_v2__10 | Other, Please specify |
| 1   | paq128a_v2__1                                                                    | Not feeling supported enough in my intervention                                                                    |                                                                                                                                                                                                                                                                                                                                                                                                                                                                                                                                                                                                                                                                                                                                                                                                                                                                                                                                                                                              |   |                 |                                                 |                                                         |               |                                                |   |                |                                          |   |               |                                         |   |               |                                          |   |               |                       |   |               |                                  |   |               |                             |   |               |                                 |    |                |                       |
| 2   | paq128a_v2__2                                                                    | Not having had the necessary training                                                                              |                                                                                                                                                                                                                                                                                                                                                                                                                                                                                                                                                                                                                                                                                                                                                                                                                                                                                                                                                                                              |   |                 |                                                 |                                                         |               |                                                |   |                |                                          |   |               |                                         |   |               |                                          |   |               |                       |   |               |                                  |   |               |                             |   |               |                                 |    |                |                       |
| 3   | paq128a_v2__3                                                                    | Not having had the necessary information                                                                           |                                                                                                                                                                                                                                                                                                                                                                                                                                                                                                                                                                                                                                                                                                                                                                                                                                                                                                                                                                                              |   |                 |                                                 |                                                         |               |                                                |   |                |                                          |   |               |                                         |   |               |                                          |   |               |                       |   |               |                                  |   |               |                             |   |               |                                 |    |                |                       |
| 4   | paq128a_v2__4                                                                    | Do not fully understand my contribution                                                                            |                                                                                                                                                                                                                                                                                                                                                                                                                                                                                                                                                                                                                                                                                                                                                                                                                                                                                                                                                                                              |   |                 |                                                 |                                                         |               |                                                |   |                |                                          |   |               |                                         |   |               |                                          |   |               |                       |   |               |                                  |   |               |                             |   |               |                                 |    |                |                       |
| 5   | paq128a_v2__5                                                                    | Not feeling part of the health care team                                                                           |                                                                                                                                                                                                                                                                                                                                                                                                                                                                                                                                                                                                                                                                                                                                                                                                                                                                                                                                                                                              |   |                 |                                                 |                                                         |               |                                                |   |                |                                          |   |               |                                         |   |               |                                          |   |               |                       |   |               |                                  |   |               |                             |   |               |                                 |    |                |                       |
| 6   | paq128a_v2__6                                                                    | Reliving my illness                                                                                                |                                                                                                                                                                                                                                                                                                                                                                                                                                                                                                                                                                                                                                                                                                                                                                                                                                                                                                                                                                                              |   |                 |                                                 |                                                         |               |                                                |   |                |                                          |   |               |                                         |   |               |                                          |   |               |                       |   |               |                                  |   |               |                             |   |               |                                 |    |                |                       |
| 7   | paq128a_v2__7                                                                    | Having too many responsibilities                                                                                   |                                                                                                                                                                                                                                                                                                                                                                                                                                                                                                                                                                                                                                                                                                                                                                                                                                                                                                                                                                                              |   |                 |                                                 |                                                         |               |                                                |   |                |                                          |   |               |                                         |   |               |                                          |   |               |                       |   |               |                                  |   |               |                             |   |               |                                 |    |                |                       |
| 8   | paq128a_v2__8                                                                    | Having too many constraints                                                                                        |                                                                                                                                                                                                                                                                                                                                                                                                                                                                                                                                                                                                                                                                                                                                                                                                                                                                                                                                                                                              |   |                 |                                                 |                                                         |               |                                                |   |                |                                          |   |               |                                         |   |               |                                          |   |               |                       |   |               |                                  |   |               |                             |   |               |                                 |    |                |                       |
| 9   | paq128a_v2__9                                                                    | Not feeling up to the situation                                                                                    |                                                                                                                                                                                                                                                                                                                                                                                                                                                                                                                                                                                                                                                                                                                                                                                                                                                                                                                                                                                              |   |                 |                                                 |                                                         |               |                                                |   |                |                                          |   |               |                                         |   |               |                                          |   |               |                       |   |               |                                  |   |               |                             |   |               |                                 |    |                |                       |
| 10  | paq128a_v2__10                                                                   | Other, Please specify                                                                                              |                                                                                                                                                                                                                                                                                                                                                                                                                                                                                                                                                                                                                                                                                                                                                                                                                                                                                                                                                                                              |   |                 |                                                 |                                                         |               |                                                |   |                |                                          |   |               |                                         |   |               |                                          |   |               |                       |   |               |                                  |   |               |                             |   |               |                                 |    |                |                       |
| 239 | paimpactne_v2<br>Afficher le champ UNIQUEM<br>ENT si :<br>[paq128a_v2(10)] = '1' | If other, please specify which ones.                                                                               | notes<br>Alignement personnalisé : LV                                                                                                                                                                                                                                                                                                                                                                                                                                                                                                                                                                                                                                                                                                                                                                                                                                                                                                                                                        |   |                 |                                                 |                                                         |               |                                                |   |                |                                          |   |               |                                         |   |               |                                          |   |               |                       |   |               |                                  |   |               |                             |   |               |                                 |    |                |                       |
| 240 | paq_recom                                                                        | In the end, do you think this type of meeting would be interesting to deploy to help more patients and caregivers? | radio<br><table border="1"> <tr> <td>1</td> <td>Yes, absolutely</td> </tr> <tr> <td>2</td> <td>Yes, but by reviewing some of the terms and conditions.</td> </tr> <tr> <td>3</td> <td>Rather not, it doesn't really matter</td> </tr> <tr> <td>4</td> <td>No, not at all</td> </tr> </table>                                                                                                                                                                                                                                                                                                                                                                                                                                                                                                                                                                                                                                                                                                 | 1 | Yes, absolutely | 2                                               | Yes, but by reviewing some of the terms and conditions. | 3             | Rather not, it doesn't really matter           | 4 | No, not at all |                                          |   |               |                                         |   |               |                                          |   |               |                       |   |               |                                  |   |               |                             |   |               |                                 |    |                |                       |
| 1   | Yes, absolutely                                                                  |                                                                                                                    |                                                                                                                                                                                                                                                                                                                                                                                                                                                                                                                                                                                                                                                                                                                                                                                                                                                                                                                                                                                              |   |                 |                                                 |                                                         |               |                                                |   |                |                                          |   |               |                                         |   |               |                                          |   |               |                       |   |               |                                  |   |               |                             |   |               |                                 |    |                |                       |
| 2   | Yes, but by reviewing some of the terms and conditions.                          |                                                                                                                    |                                                                                                                                                                                                                                                                                                                                                                                                                                                                                                                                                                                                                                                                                                                                                                                                                                                                                                                                                                                              |   |                 |                                                 |                                                         |               |                                                |   |                |                                          |   |               |                                         |   |               |                                          |   |               |                       |   |               |                                  |   |               |                             |   |               |                                 |    |                |                       |
| 3   | Rather not, it doesn't really matter                                             |                                                                                                                    |                                                                                                                                                                                                                                                                                                                                                                                                                                                                                                                                                                                                                                                                                                                                                                                                                                                                                                                                                                                              |   |                 |                                                 |                                                         |               |                                                |   |                |                                          |   |               |                                         |   |               |                                          |   |               |                       |   |               |                                  |   |               |                             |   |               |                                 |    |                |                       |
| 4   | No, not at all                                                                   |                                                                                                                    |                                                                                                                                                                                                                                                                                                                                                                                                                                                                                                                                                                                                                                                                                                                                                                                                                                                                                                                                                                                              |   |                 |                                                 |                                                         |               |                                                |   |                |                                          |   |               |                                         |   |               |                                          |   |               |                       |   |               |                                  |   |               |                             |   |               |                                 |    |                |                       |
| 241 | paq_recom_precis<br>Afficher le champ UNIQUEM<br>ENT si :<br>[paq_recom] = '2'   | Please specify these terms and conditions to be reviewed.                                                          | text                                                                                                                                                                                                                                                                                                                                                                                                                                                                                                                                                                                                                                                                                                                                                                                                                                                                                                                                                                                         |   |                 |                                                 |                                                         |               |                                                |   |                |                                          |   |               |                                         |   |               |                                          |   |               |                       |   |               |                                  |   |               |                             |   |               |                                 |    |                |                       |
| 242 | paq145_v2                                                                        | Thank you for your participation and collaboration!                                                                | radio<br>Alignement personnalisé : LV                                                                                                                                                                                                                                                                                                                                                                                                                                                                                                                                                                                                                                                                                                                                                                                                                                                                                                                                                        |   |                 |                                                 |                                                         |               |                                                |   |                |                                          |   |               |                                         |   |               |                                          |   |               |                       |   |               |                                  |   |               |                             |   |               |                                 |    |                |                       |

|                                                                         |            |                                                                     |                                                      |                                                                                                                                                                                                  |          |  |   |            |   |            |   |          |
|-------------------------------------------------------------------------|------------|---------------------------------------------------------------------|------------------------------------------------------|--------------------------------------------------------------------------------------------------------------------------------------------------------------------------------------------------|----------|--|---|------------|---|------------|---|----------|
|                                                                         | 243        | review_of_pa_experience_wit<br>h_patient_questionnaire_com<br>plete | En-tête de section : <i>Form Status</i><br>Complete? | <table border="1"> <tr> <td colspan="2">dropdown</td> </tr> <tr> <td>0</td> <td>Incomplete</td> </tr> <tr> <td>1</td> <td>Unverified</td> </tr> <tr> <td>2</td> <td>Complete</td> </tr> </table> | dropdown |  | 0 | Incomplete | 1 | Unverified | 2 | Complete |
| dropdown                                                                |            |                                                                     |                                                      |                                                                                                                                                                                                  |          |  |   |            |   |            |   |          |
| 0                                                                       | Incomplete |                                                                     |                                                      |                                                                                                                                                                                                  |          |  |   |            |   |            |   |          |
| 1                                                                       | Unverified |                                                                     |                                                      |                                                                                                                                                                                                  |          |  |   |            |   |            |   |          |
| 2                                                                       | Complete   |                                                                     |                                                      |                                                                                                                                                                                                  |          |  |   |            |   |            |   |          |
| Formulaire : <b>Focus group</b> (focus_group)                           |            |                                                                     |                                                      | Expand                                                                                                                                                                                           |          |  |   |            |   |            |   |          |
| Formulaire : <b>PA-Debriefing report</b> (padebriefing_report)          |            |                                                                     |                                                      | Expand                                                                                                                                                                                           |          |  |   |            |   |            |   |          |
| Formulaire : <b>End-of-study status</b> (endofstudy_status)             |            |                                                                     |                                                      | Expand                                                                                                                                                                                           |          |  |   |            |   |            |   |          |
| Formulaire : <b>Interview</b> (interview)                               |            |                                                                     |                                                      | Expand                                                                                                                                                                                           |          |  |   |            |   |            |   |          |
| Formulaire : <b>Focus group general form</b> (focus_group_general_form) |            |                                                                     |                                                      | Expand                                                                                                                                                                                           |          |  |   |            |   |            |   |          |
