# Supplementary material
Source: PubMed Central journal article supplement (PMC7780394)
Supplement: 12913_2020_6009_MOESM6_ESM.pdf [file 12913_2020_6009_MOESM6_ESM.pdf]

[^ Collapse all instruments](#)

| #                                                                | Nom de variable/champ                                                          | Étiquette de champ<br><i>Note de champ</i>                                                                                                                                                                                           | Attributs de champ (type de champ, validation, choix, logique de branchement, calculs, etc.)                                                                                                                                                                                                                                                                                                                                                                                                                                                                            |   |                |                        |                                                 |                |                                                    |   |                                                            |       |                   |   |                                                |   |                         |   |                                      |   |         |
|------------------------------------------------------------------|--------------------------------------------------------------------------------|--------------------------------------------------------------------------------------------------------------------------------------------------------------------------------------------------------------------------------------|-------------------------------------------------------------------------------------------------------------------------------------------------------------------------------------------------------------------------------------------------------------------------------------------------------------------------------------------------------------------------------------------------------------------------------------------------------------------------------------------------------------------------------------------------------------------------|---|----------------|------------------------|-------------------------------------------------|----------------|----------------------------------------------------|---|------------------------------------------------------------|-------|-------------------|---|------------------------------------------------|---|-------------------------|---|--------------------------------------|---|---------|
| Formulaire : <b>Logbook</b> (logbook) <a href="#">^ Collapse</a> |                                                                                |                                                                                                                                                                                                                                      |                                                                                                                                                                                                                                                                                                                                                                                                                                                                                                                                                                         |   |                |                        |                                                 |                |                                                    |   |                                                            |       |                   |   |                                                |   |                         |   |                                      |   |         |
| 1                                                                | record_id                                                                      | Record ID                                                                                                                                                                                                                            | text                                                                                                                                                                                                                                                                                                                                                                                                                                                                                                                                                                    |   |                |                        |                                                 |                |                                                    |   |                                                            |       |                   |   |                                                |   |                         |   |                                      |   |         |
| 2                                                                | journal_instruc                                                                | Please note that for those who fill this out online, it is possible to decrease or increase the font size by clicking on the + or - at the top right.                                                                                | descriptive                                                                                                                                                                                                                                                                                                                                                                                                                                                                                                                                                             |   |                |                        |                                                 |                |                                                    |   |                                                            |       |                   |   |                                                |   |                         |   |                                      |   |         |
| 3                                                                | jb_idppa                                                                       | Patient advisor code :                                                                                                                                                                                                               | text, Required                                                                                                                                                                                                                                                                                                                                                                                                                                                                                                                                                          |   |                |                        |                                                 |                |                                                    |   |                                                            |       |                   |   |                                                |   |                         |   |                                      |   |         |
| 4                                                                | journal_nomppa                                                                 | Last name of the patient advisor:<br><i>These data are identifying and will be hidden when exporting the data, only your code will appear. They will only be used in case of identification problem if the code is missing.</i>      | text, Identifier                                                                                                                                                                                                                                                                                                                                                                                                                                                                                                                                                        |   |                |                        |                                                 |                |                                                    |   |                                                            |       |                   |   |                                                |   |                         |   |                                      |   |         |
| 5                                                                | journal_prenom                                                                 | First name of the patient advisor:<br><i>These data are identifying and will be hidden when exporting the data, only your code will appear. They will only be used in case of identification problem if the code is missing.</i>     | text, Identifier                                                                                                                                                                                                                                                                                                                                                                                                                                                                                                                                                        |   |                |                        |                                                 |                |                                                    |   |                                                            |       |                   |   |                                                |   |                         |   |                                      |   |         |
| 6                                                                | jb_acc_etab                                                                    | In which institution do you accompany patients?                                                                                                                                                                                      | radio <table border="1"> <tr><td>1</td><td>At CHUM</td></tr> <tr><td>2</td><td>At CIUSSS de la Mauricie-et-du-Centre-du-Québec</td></tr> <tr><td>3</td><td>At CIUSSS de l'Est-de-l'Île-de-Montréal</td></tr> <tr><td>4</td><td>At CHU de Québec - Université Laval</td></tr> <tr><td>5</td><td>At CISSS de Laval</td></tr> <tr><td>6</td><td>At CIUSSS du Centre-Ouest-de-l'Île-de-Montréal</td></tr> <tr><td>7</td><td>At CISSS de la Gaspésie</td></tr> <tr><td>8</td><td>At CIUSSS du Saguenay-Lac-Saint-Jean</td></tr> <tr><td>9</td><td>At CUSM</td></tr> </table> | 1 | At CHUM        | 2                      | At CIUSSS de la Mauricie-et-du-Centre-du-Québec | 3              | At CIUSSS de l'Est-de-l'Île-de-Montréal            | 4 | At CHU de Québec - Université Laval                        | 5     | At CISSS de Laval | 6 | At CIUSSS du Centre-Ouest-de-l'Île-de-Montréal | 7 | At CISSS de la Gaspésie | 8 | At CIUSSS du Saguenay-Lac-Saint-Jean | 9 | At CUSM |
| 1                                                                | At CHUM                                                                        |                                                                                                                                                                                                                                      |                                                                                                                                                                                                                                                                                                                                                                                                                                                                                                                                                                         |   |                |                        |                                                 |                |                                                    |   |                                                            |       |                   |   |                                                |   |                         |   |                                      |   |         |
| 2                                                                | At CIUSSS de la Mauricie-et-du-Centre-du-Québec                                |                                                                                                                                                                                                                                      |                                                                                                                                                                                                                                                                                                                                                                                                                                                                                                                                                                         |   |                |                        |                                                 |                |                                                    |   |                                                            |       |                   |   |                                                |   |                         |   |                                      |   |         |
| 3                                                                | At CIUSSS de l'Est-de-l'Île-de-Montréal                                        |                                                                                                                                                                                                                                      |                                                                                                                                                                                                                                                                                                                                                                                                                                                                                                                                                                         |   |                |                        |                                                 |                |                                                    |   |                                                            |       |                   |   |                                                |   |                         |   |                                      |   |         |
| 4                                                                | At CHU de Québec - Université Laval                                            |                                                                                                                                                                                                                                      |                                                                                                                                                                                                                                                                                                                                                                                                                                                                                                                                                                         |   |                |                        |                                                 |                |                                                    |   |                                                            |       |                   |   |                                                |   |                         |   |                                      |   |         |
| 5                                                                | At CISSS de Laval                                                              |                                                                                                                                                                                                                                      |                                                                                                                                                                                                                                                                                                                                                                                                                                                                                                                                                                         |   |                |                        |                                                 |                |                                                    |   |                                                            |       |                   |   |                                                |   |                         |   |                                      |   |         |
| 6                                                                | At CIUSSS du Centre-Ouest-de-l'Île-de-Montréal                                 |                                                                                                                                                                                                                                      |                                                                                                                                                                                                                                                                                                                                                                                                                                                                                                                                                                         |   |                |                        |                                                 |                |                                                    |   |                                                            |       |                   |   |                                                |   |                         |   |                                      |   |         |
| 7                                                                | At CISSS de la Gaspésie                                                        |                                                                                                                                                                                                                                      |                                                                                                                                                                                                                                                                                                                                                                                                                                                                                                                                                                         |   |                |                        |                                                 |                |                                                    |   |                                                            |       |                   |   |                                                |   |                         |   |                                      |   |         |
| 8                                                                | At CIUSSS du Saguenay-Lac-Saint-Jean                                           |                                                                                                                                                                                                                                      |                                                                                                                                                                                                                                                                                                                                                                                                                                                                                                                                                                         |   |                |                        |                                                 |                |                                                    |   |                                                            |       |                   |   |                                                |   |                         |   |                                      |   |         |
| 9                                                                | At CUSM                                                                        |                                                                                                                                                                                                                                      |                                                                                                                                                                                                                                                                                                                                                                                                                                                                                                                                                                         |   |                |                        |                                                 |                |                                                    |   |                                                            |       |                   |   |                                                |   |                         |   |                                      |   |         |
| 7                                                                | jb_inf_acc                                                                     | INFORMATION ON ACCOMPANIMENT                                                                                                                                                                                                         | descriptive                                                                                                                                                                                                                                                                                                                                                                                                                                                                                                                                                             |   |                |                        |                                                 |                |                                                    |   |                                                            |       |                   |   |                                                |   |                         |   |                                      |   |         |
| 8                                                                | jb_id_pa                                                                       | Accompanied patient code:                                                                                                                                                                                                            | text                                                                                                                                                                                                                                                                                                                                                                                                                                                                                                                                                                    |   |                |                        |                                                 |                |                                                    |   |                                                            |       |                   |   |                                                |   |                         |   |                                      |   |         |
| 9                                                                | jb_nom                                                                         | Last name of the accompanied patient:<br><i>These data are identifying and will be hidden when exporting the data, only your code will appear. They will only be used in case of identification problem if the code is missing.</i>  | text, Identifier                                                                                                                                                                                                                                                                                                                                                                                                                                                                                                                                                        |   |                |                        |                                                 |                |                                                    |   |                                                            |       |                   |   |                                                |   |                         |   |                                      |   |         |
| 10                                                               | jb_prenom                                                                      | First name of the accompanied patient:<br><i>These data are identifying and will be hidden when exporting the data, only your code will appear. They will only be used in case of identification problem if the code is missing.</i> | text, Identifier                                                                                                                                                                                                                                                                                                                                                                                                                                                                                                                                                        |   |                |                        |                                                 |                |                                                    |   |                                                            |       |                   |   |                                                |   |                         |   |                                      |   |         |
| 11                                                               | da_jb                                                                          | Date of accompaniment                                                                                                                                                                                                                | text (date_dmy)                                                                                                                                                                                                                                                                                                                                                                                                                                                                                                                                                         |   |                |                        |                                                 |                |                                                    |   |                                                            |       |                   |   |                                                |   |                         |   |                                      |   |         |
| 12                                                               | jb_acc_hdebut                                                                  | Start time<br><i>HH:MM</i>                                                                                                                                                                                                           | text (time)                                                                                                                                                                                                                                                                                                                                                                                                                                                                                                                                                             |   |                |                        |                                                 |                |                                                    |   |                                                            |       |                   |   |                                                |   |                         |   |                                      |   |         |
| 13                                                               | jb_acc_duree                                                                   | Duration :<br><i>Please write the duration in hour format (e.g. 90 minutes; write 01:30).</i>                                                                                                                                        | text (time)                                                                                                                                                                                                                                                                                                                                                                                                                                                                                                                                                             |   |                |                        |                                                 |                |                                                    |   |                                                            |       |                   |   |                                                |   |                         |   |                                      |   |         |
| 14                                                               | jb_acc_suivi_renc                                                              | Accompaniment is a:                                                                                                                                                                                                                  | radio <table border="1"> <tr><td>1</td><td>First Meeting</td></tr> <tr><td>2</td><td>Follow-up meeting at the patient's request</td></tr> <tr><td>3</td><td>Follow-up meeting initiated by the patient advisor</td></tr> <tr><td>4</td><td>Follow-up meeting at the request of a health care provider</td></tr> </table>                                                                                                                                                                                                                                                | 1 | First Meeting  | 2                      | Follow-up meeting at the patient's request      | 3              | Follow-up meeting initiated by the patient advisor | 4 | Follow-up meeting at the request of a health care provider |       |                   |   |                                                |   |                         |   |                                      |   |         |
| 1                                                                | First Meeting                                                                  |                                                                                                                                                                                                                                      |                                                                                                                                                                                                                                                                                                                                                                                                                                                                                                                                                                         |   |                |                        |                                                 |                |                                                    |   |                                                            |       |                   |   |                                                |   |                         |   |                                      |   |         |
| 2                                                                | Follow-up meeting at the patient's request                                     |                                                                                                                                                                                                                                      |                                                                                                                                                                                                                                                                                                                                                                                                                                                                                                                                                                         |   |                |                        |                                                 |                |                                                    |   |                                                            |       |                   |   |                                                |   |                         |   |                                      |   |         |
| 3                                                                | Follow-up meeting initiated by the patient advisor                             |                                                                                                                                                                                                                                      |                                                                                                                                                                                                                                                                                                                                                                                                                                                                                                                                                                         |   |                |                        |                                                 |                |                                                    |   |                                                            |       |                   |   |                                                |   |                         |   |                                      |   |         |
| 4                                                                | Follow-up meeting at the request of a health care provider                     |                                                                                                                                                                                                                                      |                                                                                                                                                                                                                                                                                                                                                                                                                                                                                                                                                                         |   |                |                        |                                                 |                |                                                    |   |                                                            |       |                   |   |                                                |   |                         |   |                                      |   |         |
| 15                                                               | jb_acc_nint<br>Afficher le champ UNIQUEM ENT si :<br>[jb_acc_suivi_renc] = '1' | Accompaniment requested by:                                                                                                                                                                                                          | checkbox <table border="1"> <tr><td>0</td><td>jb_acc_nint__0</td><td>A health care provider</td></tr> <tr><td>1</td><td>jb_acc_nint__1</td><td>The patient</td></tr> <tr><td>2</td><td>jb_acc_nint__2</td><td>Other</td></tr> </table>                                                                                                                                                                                                                                                                                                                                  | 0 | jb_acc_nint__0 | A health care provider | 1                                               | jb_acc_nint__1 | The patient                                        | 2 | jb_acc_nint__2                                             | Other |                   |   |                                                |   |                         |   |                                      |   |         |
| 0                                                                | jb_acc_nint__0                                                                 | A health care provider                                                                                                                                                                                                               |                                                                                                                                                                                                                                                                                                                                                                                                                                                                                                                                                                         |   |                |                        |                                                 |                |                                                    |   |                                                            |       |                   |   |                                                |   |                         |   |                                      |   |         |
| 1                                                                | jb_acc_nint__1                                                                 | The patient                                                                                                                                                                                                                          |                                                                                                                                                                                                                                                                                                                                                                                                                                                                                                                                                                         |   |                |                        |                                                 |                |                                                    |   |                                                            |       |                   |   |                                                |   |                         |   |                                      |   |         |
| 2                                                                | jb_acc_nint__2                                                                 | Other                                                                                                                                                                                                                                |                                                                                                                                                                                                                                                                                                                                                                                                                                                                                                                                                                         |   |                |                        |                                                 |                |                                                    |   |                                                            |       |                   |   |                                                |   |                         |   |                                      |   |         |

|    |                                                                                                                                               |                                                              |                                                                                                                                                                                                                                                                                                                                                                                                                                                                                                                                                                                                                                                                                                                                                                                                                                                                                                                                                                                                                                                                        |   |                                                     |                                          |                                                   |                     |                                    |   |                     |                              |                                   |                     |                     |   |                     |                               |   |                  |                              |   |                  |                     |   |                  |                               |   |                  |                       |    |                   |               |    |                   |                                   |    |                   |       |
|----|-----------------------------------------------------------------------------------------------------------------------------------------------|--------------------------------------------------------------|------------------------------------------------------------------------------------------------------------------------------------------------------------------------------------------------------------------------------------------------------------------------------------------------------------------------------------------------------------------------------------------------------------------------------------------------------------------------------------------------------------------------------------------------------------------------------------------------------------------------------------------------------------------------------------------------------------------------------------------------------------------------------------------------------------------------------------------------------------------------------------------------------------------------------------------------------------------------------------------------------------------------------------------------------------------------|---|-----------------------------------------------------|------------------------------------------|---------------------------------------------------|---------------------|------------------------------------|---|---------------------|------------------------------|-----------------------------------|---------------------|---------------------|---|---------------------|-------------------------------|---|------------------|------------------------------|---|------------------|---------------------|---|------------------|-------------------------------|---|------------------|-----------------------|----|-------------------|---------------|----|-------------------|-----------------------------------|----|-------------------|-------|
| 16 | jb_demacc<br>Afficher le champ UNIQUEM<br>ENT si :<br>[jb_acc_nint(2)] = '1'                                                                  | If other, please specify:                                    | text                                                                                                                                                                                                                                                                                                                                                                                                                                                                                                                                                                                                                                                                                                                                                                                                                                                                                                                                                                                                                                                                   |   |                                                     |                                          |                                                   |                     |                                    |   |                     |                              |                                   |                     |                     |   |                     |                               |   |                  |                              |   |                  |                     |   |                  |                               |   |                  |                       |    |                   |               |    |                   |                                   |    |                   |       |
| 17 | jb_acc_numero<br>Afficher le champ UNIQUEM<br>ENT si :<br>[jb_acc_suivi_renc] = '2' or [jb_acc_suivi_renc] = '3' or [jb_acc_suivi_renc] = '4' | Meeting number:                                              | text (number, Min. : 1, Max. : 10)                                                                                                                                                                                                                                                                                                                                                                                                                                                                                                                                                                                                                                                                                                                                                                                                                                                                                                                                                                                                                                     |   |                                                     |                                          |                                                   |                     |                                    |   |                     |                              |                                   |                     |                     |   |                     |                               |   |                  |                              |   |                  |                     |   |                  |                               |   |                  |                       |    |                   |               |    |                   |                                   |    |                   |       |
| 18 | jb_acc_autreint                                                                                                                               | Other person/people present at the time of the accompaniment | radio<br><table border="1"> <tr> <td>0</td> <td>No</td> </tr> <tr> <td>1</td> <td>Yes</td> </tr> </table>                                                                                                                                                                                                                                                                                                                                                                                                                                                                                                                                                                                                                                                                                                                                                                                                                                                                                                                                                              | 0 | No                                                  | 1                                        | Yes                                               |                     |                                    |   |                     |                              |                                   |                     |                     |   |                     |                               |   |                  |                              |   |                  |                     |   |                  |                               |   |                  |                       |    |                   |               |    |                   |                                   |    |                   |       |
| 0  | No                                                                                                                                            |                                                              |                                                                                                                                                                                                                                                                                                                                                                                                                                                                                                                                                                                                                                                                                                                                                                                                                                                                                                                                                                                                                                                                        |   |                                                     |                                          |                                                   |                     |                                    |   |                     |                              |                                   |                     |                     |   |                     |                               |   |                  |                              |   |                  |                     |   |                  |                               |   |                  |                       |    |                   |               |    |                   |                                   |    |                   |       |
| 1  | Yes                                                                                                                                           |                                                              |                                                                                                                                                                                                                                                                                                                                                                                                                                                                                                                                                                                                                                                                                                                                                                                                                                                                                                                                                                                                                                                                        |   |                                                     |                                          |                                                   |                     |                                    |   |                     |                              |                                   |                     |                     |   |                     |                               |   |                  |                              |   |                  |                     |   |                  |                               |   |                  |                       |    |                   |               |    |                   |                                   |    |                   |       |
| 19 | jb_acc_nautreint<br>Afficher le champ UNIQUEM<br>ENT si :<br>[jb_acc_autreint] = '1'                                                          | If yes, please specify                                       | checkbox<br><table border="1"> <tr> <td>1</td> <td>jb_acc_nautreint__1</td> <td>Spouse</td> </tr> <tr> <td>2</td> <td>jb_acc_nautreint__2</td> <td>Child</td> </tr> <tr> <td>3</td> <td>jb_acc_nautreint__3</td> <td>Father; Mother</td> </tr> <tr> <td>4</td> <td>jb_acc_nautreint__4</td> <td>Friend</td> </tr> <tr> <td>5</td> <td>jb_acc_nautreint__5</td> <td>Other</td> </tr> </table>                                                                                                                                                                                                                                                                                                                                                                                                                                                                                                                                                                                                                                                                           | 1 | jb_acc_nautreint__1                                 | Spouse                                   | 2                                                 | jb_acc_nautreint__2 | Child                              | 3 | jb_acc_nautreint__3 | Father; Mother               | 4                                 | jb_acc_nautreint__4 | Friend              | 5 | jb_acc_nautreint__5 | Other                         |   |                  |                              |   |                  |                     |   |                  |                               |   |                  |                       |    |                   |               |    |                   |                                   |    |                   |       |
| 1  | jb_acc_nautreint__1                                                                                                                           | Spouse                                                       |                                                                                                                                                                                                                                                                                                                                                                                                                                                                                                                                                                                                                                                                                                                                                                                                                                                                                                                                                                                                                                                                        |   |                                                     |                                          |                                                   |                     |                                    |   |                     |                              |                                   |                     |                     |   |                     |                               |   |                  |                              |   |                  |                     |   |                  |                               |   |                  |                       |    |                   |               |    |                   |                                   |    |                   |       |
| 2  | jb_acc_nautreint__2                                                                                                                           | Child                                                        |                                                                                                                                                                                                                                                                                                                                                                                                                                                                                                                                                                                                                                                                                                                                                                                                                                                                                                                                                                                                                                                                        |   |                                                     |                                          |                                                   |                     |                                    |   |                     |                              |                                   |                     |                     |   |                     |                               |   |                  |                              |   |                  |                     |   |                  |                               |   |                  |                       |    |                   |               |    |                   |                                   |    |                   |       |
| 3  | jb_acc_nautreint__3                                                                                                                           | Father; Mother                                               |                                                                                                                                                                                                                                                                                                                                                                                                                                                                                                                                                                                                                                                                                                                                                                                                                                                                                                                                                                                                                                                                        |   |                                                     |                                          |                                                   |                     |                                    |   |                     |                              |                                   |                     |                     |   |                     |                               |   |                  |                              |   |                  |                     |   |                  |                               |   |                  |                       |    |                   |               |    |                   |                                   |    |                   |       |
| 4  | jb_acc_nautreint__4                                                                                                                           | Friend                                                       |                                                                                                                                                                                                                                                                                                                                                                                                                                                                                                                                                                                                                                                                                                                                                                                                                                                                                                                                                                                                                                                                        |   |                                                     |                                          |                                                   |                     |                                    |   |                     |                              |                                   |                     |                     |   |                     |                               |   |                  |                              |   |                  |                     |   |                  |                               |   |                  |                       |    |                   |               |    |                   |                                   |    |                   |       |
| 5  | jb_acc_nautreint__5                                                                                                                           | Other                                                        |                                                                                                                                                                                                                                                                                                                                                                                                                                                                                                                                                                                                                                                                                                                                                                                                                                                                                                                                                                                                                                                                        |   |                                                     |                                          |                                                   |                     |                                    |   |                     |                              |                                   |                     |                     |   |                     |                               |   |                  |                              |   |                  |                     |   |                  |                               |   |                  |                       |    |                   |               |    |                   |                                   |    |                   |       |
| 20 | jb_acc_autreint_autre<br>Afficher le champ UNIQUEM<br>ENT si :<br>[jb_acc_nautreint(5)] = '1'                                                 | If other, please specify                                     | text                                                                                                                                                                                                                                                                                                                                                                                                                                                                                                                                                                                                                                                                                                                                                                                                                                                                                                                                                                                                                                                                   |   |                                                     |                                          |                                                   |                     |                                    |   |                     |                              |                                   |                     |                     |   |                     |                               |   |                  |                              |   |                  |                     |   |                  |                               |   |                  |                       |    |                   |               |    |                   |                                   |    |                   |       |
| 21 | jb_acc_typeacc                                                                                                                                | Type of accompaniment                                        | radio<br><table border="1"> <tr> <td>0</td> <td>In person, in a dedicated office of the institution</td> </tr> <tr> <td>1</td> <td>In person, at another location in the institution</td> </tr> <tr> <td>2</td> <td>In person, outside the institution</td> </tr> <tr> <td>3</td> <td>By phone</td> </tr> <tr> <td>4</td> <td>By secure teleconference (REACTS)</td> </tr> <tr> <td>5</td> <td>Other</td> </tr> </table>                                                                                                                                                                                                                                                                                                                                                                                                                                                                                                                                                                                                                                               | 0 | In person, in a dedicated office of the institution | 1                                        | In person, at another location in the institution | 2                   | In person, outside the institution | 3 | By phone            | 4                            | By secure teleconference (REACTS) | 5                   | Other               |   |                     |                               |   |                  |                              |   |                  |                     |   |                  |                               |   |                  |                       |    |                   |               |    |                   |                                   |    |                   |       |
| 0  | In person, in a dedicated office of the institution                                                                                           |                                                              |                                                                                                                                                                                                                                                                                                                                                                                                                                                                                                                                                                                                                                                                                                                                                                                                                                                                                                                                                                                                                                                                        |   |                                                     |                                          |                                                   |                     |                                    |   |                     |                              |                                   |                     |                     |   |                     |                               |   |                  |                              |   |                  |                     |   |                  |                               |   |                  |                       |    |                   |               |    |                   |                                   |    |                   |       |
| 1  | In person, at another location in the institution                                                                                             |                                                              |                                                                                                                                                                                                                                                                                                                                                                                                                                                                                                                                                                                                                                                                                                                                                                                                                                                                                                                                                                                                                                                                        |   |                                                     |                                          |                                                   |                     |                                    |   |                     |                              |                                   |                     |                     |   |                     |                               |   |                  |                              |   |                  |                     |   |                  |                               |   |                  |                       |    |                   |               |    |                   |                                   |    |                   |       |
| 2  | In person, outside the institution                                                                                                            |                                                              |                                                                                                                                                                                                                                                                                                                                                                                                                                                                                                                                                                                                                                                                                                                                                                                                                                                                                                                                                                                                                                                                        |   |                                                     |                                          |                                                   |                     |                                    |   |                     |                              |                                   |                     |                     |   |                     |                               |   |                  |                              |   |                  |                     |   |                  |                               |   |                  |                       |    |                   |               |    |                   |                                   |    |                   |       |
| 3  | By phone                                                                                                                                      |                                                              |                                                                                                                                                                                                                                                                                                                                                                                                                                                                                                                                                                                                                                                                                                                                                                                                                                                                                                                                                                                                                                                                        |   |                                                     |                                          |                                                   |                     |                                    |   |                     |                              |                                   |                     |                     |   |                     |                               |   |                  |                              |   |                  |                     |   |                  |                               |   |                  |                       |    |                   |               |    |                   |                                   |    |                   |       |
| 4  | By secure teleconference (REACTS)                                                                                                             |                                                              |                                                                                                                                                                                                                                                                                                                                                                                                                                                                                                                                                                                                                                                                                                                                                                                                                                                                                                                                                                                                                                                                        |   |                                                     |                                          |                                                   |                     |                                    |   |                     |                              |                                   |                     |                     |   |                     |                               |   |                  |                              |   |                  |                     |   |                  |                               |   |                  |                       |    |                   |               |    |                   |                                   |    |                   |       |
| 5  | Other                                                                                                                                         |                                                              |                                                                                                                                                                                                                                                                                                                                                                                                                                                                                                                                                                                                                                                                                                                                                                                                                                                                                                                                                                                                                                                                        |   |                                                     |                                          |                                                   |                     |                                    |   |                     |                              |                                   |                     |                     |   |                     |                               |   |                  |                              |   |                  |                     |   |                  |                               |   |                  |                       |    |                   |               |    |                   |                                   |    |                   |       |
| 22 | jb_acc_typeacc_autre<br>Afficher le champ UNIQUEM<br>ENT si :<br>[jb_acc_typeacc] = '5'                                                       | If other, specify                                            | text                                                                                                                                                                                                                                                                                                                                                                                                                                                                                                                                                                                                                                                                                                                                                                                                                                                                                                                                                                                                                                                                   |   |                                                     |                                          |                                                   |                     |                                    |   |                     |                              |                                   |                     |                     |   |                     |                               |   |                  |                              |   |                  |                     |   |                  |                               |   |                  |                       |    |                   |               |    |                   |                                   |    |                   |       |
| 23 | jb_acc_ca                                                                                                                                     | Accompanied patient has cancer                               | radio<br><table border="1"> <tr> <td>0</td> <td>No</td> </tr> <tr> <td>1</td> <td>Yes</td> </tr> </table>                                                                                                                                                                                                                                                                                                                                                                                                                                                                                                                                                                                                                                                                                                                                                                                                                                                                                                                                                              | 0 | No                                                  | 1                                        | Yes                                               |                     |                                    |   |                     |                              |                                   |                     |                     |   |                     |                               |   |                  |                              |   |                  |                     |   |                  |                               |   |                  |                       |    |                   |               |    |                   |                                   |    |                   |       |
| 0  | No                                                                                                                                            |                                                              |                                                                                                                                                                                                                                                                                                                                                                                                                                                                                                                                                                                                                                                                                                                                                                                                                                                                                                                                                                                                                                                                        |   |                                                     |                                          |                                                   |                     |                                    |   |                     |                              |                                   |                     |                     |   |                     |                               |   |                  |                              |   |                  |                     |   |                  |                               |   |                  |                       |    |                   |               |    |                   |                                   |    |                   |       |
| 1  | Yes                                                                                                                                           |                                                              |                                                                                                                                                                                                                                                                                                                                                                                                                                                                                                                                                                                                                                                                                                                                                                                                                                                                                                                                                                                                                                                                        |   |                                                     |                                          |                                                   |                     |                                    |   |                     |                              |                                   |                     |                     |   |                     |                               |   |                  |                              |   |                  |                     |   |                  |                               |   |                  |                       |    |                   |               |    |                   |                                   |    |                   |       |
| 24 | jb_acc_trajca<br>Afficher le champ UNIQUEM<br>ENT si :<br>[jb_acc_ca] = '1'                                                                   | Stage(s) of the care trajectory                              | checkbox<br><table border="1"> <tr> <td>0</td> <td>jb_acc_trajca__0</td> <td>Around the announcement of the diagnosis</td> </tr> <tr> <td>1</td> <td>jb_acc_trajca__1</td> <td>Around the screening test</td> </tr> <tr> <td>3</td> <td>jb_acc_trajca__3</td> <td>Before starting radiotherapy</td> </tr> <tr> <td>4</td> <td>jb_acc_trajca__4</td> <td>During radiotherapy</td> </tr> <tr> <td>5</td> <td>jb_acc_trajca__5</td> <td>After the end of radiotherapy</td> </tr> <tr> <td>6</td> <td>jb_acc_trajca__6</td> <td>Before starting chemotherapy</td> </tr> <tr> <td>7</td> <td>jb_acc_trajca__7</td> <td>During chemotherapy</td> </tr> <tr> <td>8</td> <td>jb_acc_trajca__8</td> <td>After the end of chemotherapy</td> </tr> <tr> <td>9</td> <td>jb_acc_trajca__9</td> <td>Before surgery begins</td> </tr> <tr> <td>10</td> <td>jb_acc_trajca__10</td> <td>After surgery</td> </tr> <tr> <td>11</td> <td>jb_acc_trajca__11</td> <td>After the end of acute treatments</td> </tr> <tr> <td>12</td> <td>jb_acc_trajca__12</td> <td>Other</td> </tr> </table> | 0 | jb_acc_trajca__0                                    | Around the announcement of the diagnosis | 1                                                 | jb_acc_trajca__1    | Around the screening test          | 3 | jb_acc_trajca__3    | Before starting radiotherapy | 4                                 | jb_acc_trajca__4    | During radiotherapy | 5 | jb_acc_trajca__5    | After the end of radiotherapy | 6 | jb_acc_trajca__6 | Before starting chemotherapy | 7 | jb_acc_trajca__7 | During chemotherapy | 8 | jb_acc_trajca__8 | After the end of chemotherapy | 9 | jb_acc_trajca__9 | Before surgery begins | 10 | jb_acc_trajca__10 | After surgery | 11 | jb_acc_trajca__11 | After the end of acute treatments | 12 | jb_acc_trajca__12 | Other |
| 0  | jb_acc_trajca__0                                                                                                                              | Around the announcement of the diagnosis                     |                                                                                                                                                                                                                                                                                                                                                                                                                                                                                                                                                                                                                                                                                                                                                                                                                                                                                                                                                                                                                                                                        |   |                                                     |                                          |                                                   |                     |                                    |   |                     |                              |                                   |                     |                     |   |                     |                               |   |                  |                              |   |                  |                     |   |                  |                               |   |                  |                       |    |                   |               |    |                   |                                   |    |                   |       |
| 1  | jb_acc_trajca__1                                                                                                                              | Around the screening test                                    |                                                                                                                                                                                                                                                                                                                                                                                                                                                                                                                                                                                                                                                                                                                                                                                                                                                                                                                                                                                                                                                                        |   |                                                     |                                          |                                                   |                     |                                    |   |                     |                              |                                   |                     |                     |   |                     |                               |   |                  |                              |   |                  |                     |   |                  |                               |   |                  |                       |    |                   |               |    |                   |                                   |    |                   |       |
| 3  | jb_acc_trajca__3                                                                                                                              | Before starting radiotherapy                                 |                                                                                                                                                                                                                                                                                                                                                                                                                                                                                                                                                                                                                                                                                                                                                                                                                                                                                                                                                                                                                                                                        |   |                                                     |                                          |                                                   |                     |                                    |   |                     |                              |                                   |                     |                     |   |                     |                               |   |                  |                              |   |                  |                     |   |                  |                               |   |                  |                       |    |                   |               |    |                   |                                   |    |                   |       |
| 4  | jb_acc_trajca__4                                                                                                                              | During radiotherapy                                          |                                                                                                                                                                                                                                                                                                                                                                                                                                                                                                                                                                                                                                                                                                                                                                                                                                                                                                                                                                                                                                                                        |   |                                                     |                                          |                                                   |                     |                                    |   |                     |                              |                                   |                     |                     |   |                     |                               |   |                  |                              |   |                  |                     |   |                  |                               |   |                  |                       |    |                   |               |    |                   |                                   |    |                   |       |
| 5  | jb_acc_trajca__5                                                                                                                              | After the end of radiotherapy                                |                                                                                                                                                                                                                                                                                                                                                                                                                                                                                                                                                                                                                                                                                                                                                                                                                                                                                                                                                                                                                                                                        |   |                                                     |                                          |                                                   |                     |                                    |   |                     |                              |                                   |                     |                     |   |                     |                               |   |                  |                              |   |                  |                     |   |                  |                               |   |                  |                       |    |                   |               |    |                   |                                   |    |                   |       |
| 6  | jb_acc_trajca__6                                                                                                                              | Before starting chemotherapy                                 |                                                                                                                                                                                                                                                                                                                                                                                                                                                                                                                                                                                                                                                                                                                                                                                                                                                                                                                                                                                                                                                                        |   |                                                     |                                          |                                                   |                     |                                    |   |                     |                              |                                   |                     |                     |   |                     |                               |   |                  |                              |   |                  |                     |   |                  |                               |   |                  |                       |    |                   |               |    |                   |                                   |    |                   |       |
| 7  | jb_acc_trajca__7                                                                                                                              | During chemotherapy                                          |                                                                                                                                                                                                                                                                                                                                                                                                                                                                                                                                                                                                                                                                                                                                                                                                                                                                                                                                                                                                                                                                        |   |                                                     |                                          |                                                   |                     |                                    |   |                     |                              |                                   |                     |                     |   |                     |                               |   |                  |                              |   |                  |                     |   |                  |                               |   |                  |                       |    |                   |               |    |                   |                                   |    |                   |       |
| 8  | jb_acc_trajca__8                                                                                                                              | After the end of chemotherapy                                |                                                                                                                                                                                                                                                                                                                                                                                                                                                                                                                                                                                                                                                                                                                                                                                                                                                                                                                                                                                                                                                                        |   |                                                     |                                          |                                                   |                     |                                    |   |                     |                              |                                   |                     |                     |   |                     |                               |   |                  |                              |   |                  |                     |   |                  |                               |   |                  |                       |    |                   |               |    |                   |                                   |    |                   |       |
| 9  | jb_acc_trajca__9                                                                                                                              | Before surgery begins                                        |                                                                                                                                                                                                                                                                                                                                                                                                                                                                                                                                                                                                                                                                                                                                                                                                                                                                                                                                                                                                                                                                        |   |                                                     |                                          |                                                   |                     |                                    |   |                     |                              |                                   |                     |                     |   |                     |                               |   |                  |                              |   |                  |                     |   |                  |                               |   |                  |                       |    |                   |               |    |                   |                                   |    |                   |       |
| 10 | jb_acc_trajca__10                                                                                                                             | After surgery                                                |                                                                                                                                                                                                                                                                                                                                                                                                                                                                                                                                                                                                                                                                                                                                                                                                                                                                                                                                                                                                                                                                        |   |                                                     |                                          |                                                   |                     |                                    |   |                     |                              |                                   |                     |                     |   |                     |                               |   |                  |                              |   |                  |                     |   |                  |                               |   |                  |                       |    |                   |               |    |                   |                                   |    |                   |       |
| 11 | jb_acc_trajca__11                                                                                                                             | After the end of acute treatments                            |                                                                                                                                                                                                                                                                                                                                                                                                                                                                                                                                                                                                                                                                                                                                                                                                                                                                                                                                                                                                                                                                        |   |                                                     |                                          |                                                   |                     |                                    |   |                     |                              |                                   |                     |                     |   |                     |                               |   |                  |                              |   |                  |                     |   |                  |                               |   |                  |                       |    |                   |               |    |                   |                                   |    |                   |       |
| 12 | jb_acc_trajca__12                                                                                                                             | Other                                                        |                                                                                                                                                                                                                                                                                                                                                                                                                                                                                                                                                                                                                                                                                                                                                                                                                                                                                                                                                                                                                                                                        |   |                                                     |                                          |                                                   |                     |                                    |   |                     |                              |                                   |                     |                     |   |                     |                               |   |                  |                              |   |                  |                     |   |                  |                               |   |                  |                       |    |                   |               |    |                   |                                   |    |                   |       |

|    |                                                                                                |                                                                                               |                                                                                                                                                                                                                                                                                                                                                                                                                                                                                                                                                                                                                                                                                                                                                                                                                                                                                                                                                   |   |                       |                                |     |                       |                                                 |   |                       |                                                 |   |                       |                          |   |                       |                                                                  |   |                   |                                              |   |                   |                                                         |   |                   |                                  |   |                   |       |
|----|------------------------------------------------------------------------------------------------|-----------------------------------------------------------------------------------------------|---------------------------------------------------------------------------------------------------------------------------------------------------------------------------------------------------------------------------------------------------------------------------------------------------------------------------------------------------------------------------------------------------------------------------------------------------------------------------------------------------------------------------------------------------------------------------------------------------------------------------------------------------------------------------------------------------------------------------------------------------------------------------------------------------------------------------------------------------------------------------------------------------------------------------------------------------|---|-----------------------|--------------------------------|-----|-----------------------|-------------------------------------------------|---|-----------------------|-------------------------------------------------|---|-----------------------|--------------------------|---|-----------------------|------------------------------------------------------------------|---|-------------------|----------------------------------------------|---|-------------------|---------------------------------------------------------|---|-------------------|----------------------------------|---|-------------------|-------|
| 25 | jb_acc_trajca_autre<br>Afficher le champ UNIQUEM<br>ENT si :<br>[jb_acc_trajca(12)] = '1'      | If other, specify                                                                             | text                                                                                                                                                                                                                                                                                                                                                                                                                                                                                                                                                                                                                                                                                                                                                                                                                                                                                                                                              |   |                       |                                |     |                       |                                                 |   |                       |                                                 |   |                       |                          |   |                       |                                                                  |   |                   |                                              |   |                   |                                                         |   |                   |                                  |   |                   |       |
| 26 | jb_acc_oncogen                                                                                 | Accompanied patient in onco-genetics                                                          | radio<br><table border="1"> <tr> <td>0</td> <td>No</td> </tr> <tr> <td>1</td> <td>Yes</td> </tr> </table>                                                                                                                                                                                                                                                                                                                                                                                                                                                                                                                                                                                                                                                                                                                                                                                                                                         | 0 | No                    | 1                              | Yes |                       |                                                 |   |                       |                                                 |   |                       |                          |   |                       |                                                                  |   |                   |                                              |   |                   |                                                         |   |                   |                                  |   |                   |       |
| 0  | No                                                                                             |                                                                                               |                                                                                                                                                                                                                                                                                                                                                                                                                                                                                                                                                                                                                                                                                                                                                                                                                                                                                                                                                   |   |                       |                                |     |                       |                                                 |   |                       |                                                 |   |                       |                          |   |                       |                                                                  |   |                   |                                              |   |                   |                                                         |   |                   |                                  |   |                   |       |
| 1  | Yes                                                                                            |                                                                                               |                                                                                                                                                                                                                                                                                                                                                                                                                                                                                                                                                                                                                                                                                                                                                                                                                                                                                                                                                   |   |                       |                                |     |                       |                                                 |   |                       |                                                 |   |                       |                          |   |                       |                                                                  |   |                   |                                              |   |                   |                                                         |   |                   |                                  |   |                   |       |
| 27 | jb_acc_trajoncogen<br>Afficher le champ UNIQUEM<br>ENT si :<br>[jb_acc_oncogen] = '1'          | Step(s) in the care trajectory                                                                | checkbox<br><table border="1"> <tr> <td>0</td> <td>jb_acc_trajoncogen__0</td> <td>Before the genetic test</td> </tr> <tr> <td>1</td> <td>jb_acc_trajoncogen__1</td> <td>Following the results of the genetic tests</td> </tr> <tr> <td>3</td> <td>jb_acc_trajoncogen__3</td> <td>Before preventive surgery</td> </tr> <tr> <td>4</td> <td>jb_acc_trajoncogen__4</td> <td>After preventive surgery</td> </tr> <tr> <td>5</td> <td>jb_acc_trajoncogen__5</td> <td>Other</td> </tr> </table>                                                                                                                                                                                                                                                                                                                                                                                                                                                         | 0 | jb_acc_trajoncogen__0 | Before the genetic test        | 1   | jb_acc_trajoncogen__1 | Following the results of the genetic tests      | 3 | jb_acc_trajoncogen__3 | Before preventive surgery                       | 4 | jb_acc_trajoncogen__4 | After preventive surgery | 5 | jb_acc_trajoncogen__5 | Other                                                            |   |                   |                                              |   |                   |                                                         |   |                   |                                  |   |                   |       |
| 0  | jb_acc_trajoncogen__0                                                                          | Before the genetic test                                                                       |                                                                                                                                                                                                                                                                                                                                                                                                                                                                                                                                                                                                                                                                                                                                                                                                                                                                                                                                                   |   |                       |                                |     |                       |                                                 |   |                       |                                                 |   |                       |                          |   |                       |                                                                  |   |                   |                                              |   |                   |                                                         |   |                   |                                  |   |                   |       |
| 1  | jb_acc_trajoncogen__1                                                                          | Following the results of the genetic tests                                                    |                                                                                                                                                                                                                                                                                                                                                                                                                                                                                                                                                                                                                                                                                                                                                                                                                                                                                                                                                   |   |                       |                                |     |                       |                                                 |   |                       |                                                 |   |                       |                          |   |                       |                                                                  |   |                   |                                              |   |                   |                                                         |   |                   |                                  |   |                   |       |
| 3  | jb_acc_trajoncogen__3                                                                          | Before preventive surgery                                                                     |                                                                                                                                                                                                                                                                                                                                                                                                                                                                                                                                                                                                                                                                                                                                                                                                                                                                                                                                                   |   |                       |                                |     |                       |                                                 |   |                       |                                                 |   |                       |                          |   |                       |                                                                  |   |                   |                                              |   |                   |                                                         |   |                   |                                  |   |                   |       |
| 4  | jb_acc_trajoncogen__4                                                                          | After preventive surgery                                                                      |                                                                                                                                                                                                                                                                                                                                                                                                                                                                                                                                                                                                                                                                                                                                                                                                                                                                                                                                                   |   |                       |                                |     |                       |                                                 |   |                       |                                                 |   |                       |                          |   |                       |                                                                  |   |                   |                                              |   |                   |                                                         |   |                   |                                  |   |                   |       |
| 5  | jb_acc_trajoncogen__5                                                                          | Other                                                                                         |                                                                                                                                                                                                                                                                                                                                                                                                                                                                                                                                                                                                                                                                                                                                                                                                                                                                                                                                                   |   |                       |                                |     |                       |                                                 |   |                       |                                                 |   |                       |                          |   |                       |                                                                  |   |                   |                                              |   |                   |                                                         |   |                   |                                  |   |                   |       |
| 28 | jb_acc_trajoncogen_a<br>Afficher le champ UNIQUEM<br>ENT si :<br>[jb_acc_trajoncogen(5)] = '1' | If other, specify                                                                             | text                                                                                                                                                                                                                                                                                                                                                                                                                                                                                                                                                                                                                                                                                                                                                                                                                                                                                                                                              |   |                       |                                |     |                       |                                                 |   |                       |                                                 |   |                       |                          |   |                       |                                                                  |   |                   |                                              |   |                   |                                                         |   |                   |                                  |   |                   |       |
| 29 | jb_acc_asp_org                                                                                 | En-tête de section : <i>TOPICS COVERED DURING THE ACCOMPANIMENT</i><br>ORGANIZATIONAL ASPECTS | checkbox<br><table border="1"> <tr> <td>1</td> <td>jb_acc_asp_org__1</td> <td>Your role as a patient advisor</td> </tr> <tr> <td>2</td> <td>jb_acc_asp_org__2</td> <td>The role of different health care professionals</td> </tr> <tr> <td>3</td> <td>jb_acc_asp_org__3</td> <td>The role of external and internal organizations</td> </tr> <tr> <td>4</td> <td>jb_acc_asp_org__4</td> <td>The care trajectory</td> </tr> <tr> <td>5</td> <td>jb_acc_asp_org__5</td> <td>Rights as a patient (e.g., refusing treatment, asking questions)</td> </tr> <tr> <td>6</td> <td>jb_acc_asp_org__6</td> <td>Where and how to get to medical appointments</td> </tr> <tr> <td>7</td> <td>jb_acc_asp_org__7</td> <td>Patient financial support and transportation assistance</td> </tr> <tr> <td>8</td> <td>jb_acc_asp_org__8</td> <td>The PAROLE-Onco research project</td> </tr> <tr> <td>9</td> <td>jb_acc_asp_org__9</td> <td>Other</td> </tr> </table> | 1 | jb_acc_asp_org__1     | Your role as a patient advisor | 2   | jb_acc_asp_org__2     | The role of different health care professionals | 3 | jb_acc_asp_org__3     | The role of external and internal organizations | 4 | jb_acc_asp_org__4     | The care trajectory      | 5 | jb_acc_asp_org__5     | Rights as a patient (e.g., refusing treatment, asking questions) | 6 | jb_acc_asp_org__6 | Where and how to get to medical appointments | 7 | jb_acc_asp_org__7 | Patient financial support and transportation assistance | 8 | jb_acc_asp_org__8 | The PAROLE-Onco research project | 9 | jb_acc_asp_org__9 | Other |
| 1  | jb_acc_asp_org__1                                                                              | Your role as a patient advisor                                                                |                                                                                                                                                                                                                                                                                                                                                                                                                                                                                                                                                                                                                                                                                                                                                                                                                                                                                                                                                   |   |                       |                                |     |                       |                                                 |   |                       |                                                 |   |                       |                          |   |                       |                                                                  |   |                   |                                              |   |                   |                                                         |   |                   |                                  |   |                   |       |
| 2  | jb_acc_asp_org__2                                                                              | The role of different health care professionals                                               |                                                                                                                                                                                                                                                                                                                                                                                                                                                                                                                                                                                                                                                                                                                                                                                                                                                                                                                                                   |   |                       |                                |     |                       |                                                 |   |                       |                                                 |   |                       |                          |   |                       |                                                                  |   |                   |                                              |   |                   |                                                         |   |                   |                                  |   |                   |       |
| 3  | jb_acc_asp_org__3                                                                              | The role of external and internal organizations                                               |                                                                                                                                                                                                                                                                                                                                                                                                                                                                                                                                                                                                                                                                                                                                                                                                                                                                                                                                                   |   |                       |                                |     |                       |                                                 |   |                       |                                                 |   |                       |                          |   |                       |                                                                  |   |                   |                                              |   |                   |                                                         |   |                   |                                  |   |                   |       |
| 4  | jb_acc_asp_org__4                                                                              | The care trajectory                                                                           |                                                                                                                                                                                                                                                                                                                                                                                                                                                                                                                                                                                                                                                                                                                                                                                                                                                                                                                                                   |   |                       |                                |     |                       |                                                 |   |                       |                                                 |   |                       |                          |   |                       |                                                                  |   |                   |                                              |   |                   |                                                         |   |                   |                                  |   |                   |       |
| 5  | jb_acc_asp_org__5                                                                              | Rights as a patient (e.g., refusing treatment, asking questions)                              |                                                                                                                                                                                                                                                                                                                                                                                                                                                                                                                                                                                                                                                                                                                                                                                                                                                                                                                                                   |   |                       |                                |     |                       |                                                 |   |                       |                                                 |   |                       |                          |   |                       |                                                                  |   |                   |                                              |   |                   |                                                         |   |                   |                                  |   |                   |       |
| 6  | jb_acc_asp_org__6                                                                              | Where and how to get to medical appointments                                                  |                                                                                                                                                                                                                                                                                                                                                                                                                                                                                                                                                                                                                                                                                                                                                                                                                                                                                                                                                   |   |                       |                                |     |                       |                                                 |   |                       |                                                 |   |                       |                          |   |                       |                                                                  |   |                   |                                              |   |                   |                                                         |   |                   |                                  |   |                   |       |
| 7  | jb_acc_asp_org__7                                                                              | Patient financial support and transportation assistance                                       |                                                                                                                                                                                                                                                                                                                                                                                                                                                                                                                                                                                                                                                                                                                                                                                                                                                                                                                                                   |   |                       |                                |     |                       |                                                 |   |                       |                                                 |   |                       |                          |   |                       |                                                                  |   |                   |                                              |   |                   |                                                         |   |                   |                                  |   |                   |       |
| 8  | jb_acc_asp_org__8                                                                              | The PAROLE-Onco research project                                                              |                                                                                                                                                                                                                                                                                                                                                                                                                                                                                                                                                                                                                                                                                                                                                                                                                                                                                                                                                   |   |                       |                                |     |                       |                                                 |   |                       |                                                 |   |                       |                          |   |                       |                                                                  |   |                   |                                              |   |                   |                                                         |   |                   |                                  |   |                   |       |
| 9  | jb_acc_asp_org__9                                                                              | Other                                                                                         |                                                                                                                                                                                                                                                                                                                                                                                                                                                                                                                                                                                                                                                                                                                                                                                                                                                                                                                                                   |   |                       |                                |     |                       |                                                 |   |                       |                                                 |   |                       |                          |   |                       |                                                                  |   |                   |                                              |   |                   |                                                         |   |                   |                                  |   |                   |       |
| 30 | jb_asp_org_autre<br>Afficher le champ UNIQUEM<br>ENT si :<br>[jb_acc_asp_org(9)] = '1'         | If you checked "Other", please specify what other topic was covered in this category:         | text                                                                                                                                                                                                                                                                                                                                                                                                                                                                                                                                                                                                                                                                                                                                                                                                                                                                                                                                              |   |                       |                                |     |                       |                                                 |   |                       |                                                 |   |                       |                          |   |                       |                                                                  |   |                   |                                              |   |                   |                                                         |   |                   |                                  |   |                   |       |

|    |                                                                                                 |                                                                                       |                                                                                                                                                                                                                                                                                                                                                                                                                                                                                                                                                                                                                                                                                                                                                                                                                                                                                                                                                                                                                                                                                                                                                                                                                                                                                                                                                                                                                                                                                                                                                                                                                                                                                                                                                                                                                                                                                                                                                                                                                                                                                                                                                                                                                                                                                                                                                                                                                                                                                                                                                                                                                                                                                                                                                                                   |   |                               |             |   |                               |                  |   |                               |                   |   |                               |             |   |                               |                       |   |                               |                      |   |                               |              |   |                               |                                                              |   |                               |                                                |    |                                |                       |    |                                |                             |    |                                |                                                             |    |                                |                                        |    |                                |       |
|----|-------------------------------------------------------------------------------------------------|---------------------------------------------------------------------------------------|-----------------------------------------------------------------------------------------------------------------------------------------------------------------------------------------------------------------------------------------------------------------------------------------------------------------------------------------------------------------------------------------------------------------------------------------------------------------------------------------------------------------------------------------------------------------------------------------------------------------------------------------------------------------------------------------------------------------------------------------------------------------------------------------------------------------------------------------------------------------------------------------------------------------------------------------------------------------------------------------------------------------------------------------------------------------------------------------------------------------------------------------------------------------------------------------------------------------------------------------------------------------------------------------------------------------------------------------------------------------------------------------------------------------------------------------------------------------------------------------------------------------------------------------------------------------------------------------------------------------------------------------------------------------------------------------------------------------------------------------------------------------------------------------------------------------------------------------------------------------------------------------------------------------------------------------------------------------------------------------------------------------------------------------------------------------------------------------------------------------------------------------------------------------------------------------------------------------------------------------------------------------------------------------------------------------------------------------------------------------------------------------------------------------------------------------------------------------------------------------------------------------------------------------------------------------------------------------------------------------------------------------------------------------------------------------------------------------------------------------------------------------------------------|---|-------------------------------|-------------|---|-------------------------------|------------------|---|-------------------------------|-------------------|---|-------------------------------|-------------|---|-------------------------------|-----------------------|---|-------------------------------|----------------------|---|-------------------------------|--------------|---|-------------------------------|--------------------------------------------------------------|---|-------------------------------|------------------------------------------------|----|--------------------------------|-----------------------|----|--------------------------------|-----------------------------|----|--------------------------------|-------------------------------------------------------------|----|--------------------------------|----------------------------------------|----|--------------------------------|-------|
| 31 | jb_acc_conseq_vie_quot_fam                                                                      | CONSEQUENCES ON DAILY AND FAMILY LIFE                                                 | checkbox <table border="1"> <tr> <td data-bbox="1026 114 1058 147">1</td> <td data-bbox="1058 114 1377 147">jb_acc_conseq_vie_quot_fam__1</td> <td data-bbox="1377 114 1493 147">On children</td> </tr> <tr> <td data-bbox="1026 147 1058 181">2</td> <td data-bbox="1058 147 1377 181">jb_acc_conseq_vie_quot_fam__2</td> <td data-bbox="1377 147 1493 181">On conjugal life</td> </tr> <tr> <td data-bbox="1026 181 1058 215">3</td> <td data-bbox="1058 181 1377 215">jb_acc_conseq_vie_quot_fam__3</td> <td data-bbox="1377 181 1493 215">About sexual life</td> </tr> <tr> <td data-bbox="1026 215 1058 248">4</td> <td data-bbox="1058 215 1377 248">jb_acc_conseq_vie_quot_fam__4</td> <td data-bbox="1377 215 1493 248">On finances</td> </tr> <tr> <td data-bbox="1026 248 1058 282">5</td> <td data-bbox="1058 248 1377 282">jb_acc_conseq_vie_quot_fam__5</td> <td data-bbox="1377 248 1493 282">On the spiritual life</td> </tr> <tr> <td data-bbox="1026 282 1058 315">6</td> <td data-bbox="1058 282 1377 315">jb_acc_conseq_vie_quot_fam__6</td> <td data-bbox="1377 282 1493 315">On professional life</td> </tr> <tr> <td data-bbox="1026 315 1058 349">7</td> <td data-bbox="1058 315 1377 349">jb_acc_conseq_vie_quot_fam__7</td> <td data-bbox="1377 315 1493 349">On insurance</td> </tr> <tr> <td data-bbox="1026 349 1058 472">8</td> <td data-bbox="1058 349 1377 472">jb_acc_conseq_vie_quot_fam__8</td> <td data-bbox="1377 349 1493 472">On how to announce a diagnosis to your family and loved ones</td> </tr> <tr> <td data-bbox="1026 472 1058 595">9</td> <td data-bbox="1058 472 1377 595">jb_acc_conseq_vie_quot_fam__9</td> <td data-bbox="1377 472 1493 595">On social perception (the reactions of others)</td> </tr> <tr> <td data-bbox="1026 595 1058 719">10</td> <td data-bbox="1058 595 1377 719">jb_acc_conseq_vie_quot_fam__10</td> <td data-bbox="1377 595 1493 719">On the return to work</td> </tr> <tr> <td data-bbox="1026 719 1058 842">11</td> <td data-bbox="1058 719 1377 842">jb_acc_conseq_vie_quot_fam__11</td> <td data-bbox="1377 719 1493 842">On the return to daily life</td> </tr> <tr> <td data-bbox="1026 842 1058 965">12</td> <td data-bbox="1058 842 1377 965">jb_acc_conseq_vie_quot_fam__12</td> <td data-bbox="1377 842 1493 965">Strategies for living the treatments in the best conditions</td> </tr> <tr> <td data-bbox="1026 965 1058 1088">13</td> <td data-bbox="1058 965 1377 1088">jb_acc_conseq_vie_quot_fam__13</td> <td data-bbox="1377 965 1493 1088">How to regain control over the disease</td> </tr> <tr> <td data-bbox="1026 1088 1058 1211">14</td> <td data-bbox="1058 1088 1377 1211">jb_acc_conseq_vie_quot_fam__14</td> <td data-bbox="1377 1088 1493 1211">Other</td> </tr> </table> | 1 | jb_acc_conseq_vie_quot_fam__1 | On children | 2 | jb_acc_conseq_vie_quot_fam__2 | On conjugal life | 3 | jb_acc_conseq_vie_quot_fam__3 | About sexual life | 4 | jb_acc_conseq_vie_quot_fam__4 | On finances | 5 | jb_acc_conseq_vie_quot_fam__5 | On the spiritual life | 6 | jb_acc_conseq_vie_quot_fam__6 | On professional life | 7 | jb_acc_conseq_vie_quot_fam__7 | On insurance | 8 | jb_acc_conseq_vie_quot_fam__8 | On how to announce a diagnosis to your family and loved ones | 9 | jb_acc_conseq_vie_quot_fam__9 | On social perception (the reactions of others) | 10 | jb_acc_conseq_vie_quot_fam__10 | On the return to work | 11 | jb_acc_conseq_vie_quot_fam__11 | On the return to daily life | 12 | jb_acc_conseq_vie_quot_fam__12 | Strategies for living the treatments in the best conditions | 13 | jb_acc_conseq_vie_quot_fam__13 | How to regain control over the disease | 14 | jb_acc_conseq_vie_quot_fam__14 | Other |
| 1  | jb_acc_conseq_vie_quot_fam__1                                                                   | On children                                                                           |                                                                                                                                                                                                                                                                                                                                                                                                                                                                                                                                                                                                                                                                                                                                                                                                                                                                                                                                                                                                                                                                                                                                                                                                                                                                                                                                                                                                                                                                                                                                                                                                                                                                                                                                                                                                                                                                                                                                                                                                                                                                                                                                                                                                                                                                                                                                                                                                                                                                                                                                                                                                                                                                                                                                                                                   |   |                               |             |   |                               |                  |   |                               |                   |   |                               |             |   |                               |                       |   |                               |                      |   |                               |              |   |                               |                                                              |   |                               |                                                |    |                                |                       |    |                                |                             |    |                                |                                                             |    |                                |                                        |    |                                |       |
| 2  | jb_acc_conseq_vie_quot_fam__2                                                                   | On conjugal life                                                                      |                                                                                                                                                                                                                                                                                                                                                                                                                                                                                                                                                                                                                                                                                                                                                                                                                                                                                                                                                                                                                                                                                                                                                                                                                                                                                                                                                                                                                                                                                                                                                                                                                                                                                                                                                                                                                                                                                                                                                                                                                                                                                                                                                                                                                                                                                                                                                                                                                                                                                                                                                                                                                                                                                                                                                                                   |   |                               |             |   |                               |                  |   |                               |                   |   |                               |             |   |                               |                       |   |                               |                      |   |                               |              |   |                               |                                                              |   |                               |                                                |    |                                |                       |    |                                |                             |    |                                |                                                             |    |                                |                                        |    |                                |       |
| 3  | jb_acc_conseq_vie_quot_fam__3                                                                   | About sexual life                                                                     |                                                                                                                                                                                                                                                                                                                                                                                                                                                                                                                                                                                                                                                                                                                                                                                                                                                                                                                                                                                                                                                                                                                                                                                                                                                                                                                                                                                                                                                                                                                                                                                                                                                                                                                                                                                                                                                                                                                                                                                                                                                                                                                                                                                                                                                                                                                                                                                                                                                                                                                                                                                                                                                                                                                                                                                   |   |                               |             |   |                               |                  |   |                               |                   |   |                               |             |   |                               |                       |   |                               |                      |   |                               |              |   |                               |                                                              |   |                               |                                                |    |                                |                       |    |                                |                             |    |                                |                                                             |    |                                |                                        |    |                                |       |
| 4  | jb_acc_conseq_vie_quot_fam__4                                                                   | On finances                                                                           |                                                                                                                                                                                                                                                                                                                                                                                                                                                                                                                                                                                                                                                                                                                                                                                                                                                                                                                                                                                                                                                                                                                                                                                                                                                                                                                                                                                                                                                                                                                                                                                                                                                                                                                                                                                                                                                                                                                                                                                                                                                                                                                                                                                                                                                                                                                                                                                                                                                                                                                                                                                                                                                                                                                                                                                   |   |                               |             |   |                               |                  |   |                               |                   |   |                               |             |   |                               |                       |   |                               |                      |   |                               |              |   |                               |                                                              |   |                               |                                                |    |                                |                       |    |                                |                             |    |                                |                                                             |    |                                |                                        |    |                                |       |
| 5  | jb_acc_conseq_vie_quot_fam__5                                                                   | On the spiritual life                                                                 |                                                                                                                                                                                                                                                                                                                                                                                                                                                                                                                                                                                                                                                                                                                                                                                                                                                                                                                                                                                                                                                                                                                                                                                                                                                                                                                                                                                                                                                                                                                                                                                                                                                                                                                                                                                                                                                                                                                                                                                                                                                                                                                                                                                                                                                                                                                                                                                                                                                                                                                                                                                                                                                                                                                                                                                   |   |                               |             |   |                               |                  |   |                               |                   |   |                               |             |   |                               |                       |   |                               |                      |   |                               |              |   |                               |                                                              |   |                               |                                                |    |                                |                       |    |                                |                             |    |                                |                                                             |    |                                |                                        |    |                                |       |
| 6  | jb_acc_conseq_vie_quot_fam__6                                                                   | On professional life                                                                  |                                                                                                                                                                                                                                                                                                                                                                                                                                                                                                                                                                                                                                                                                                                                                                                                                                                                                                                                                                                                                                                                                                                                                                                                                                                                                                                                                                                                                                                                                                                                                                                                                                                                                                                                                                                                                                                                                                                                                                                                                                                                                                                                                                                                                                                                                                                                                                                                                                                                                                                                                                                                                                                                                                                                                                                   |   |                               |             |   |                               |                  |   |                               |                   |   |                               |             |   |                               |                       |   |                               |                      |   |                               |              |   |                               |                                                              |   |                               |                                                |    |                                |                       |    |                                |                             |    |                                |                                                             |    |                                |                                        |    |                                |       |
| 7  | jb_acc_conseq_vie_quot_fam__7                                                                   | On insurance                                                                          |                                                                                                                                                                                                                                                                                                                                                                                                                                                                                                                                                                                                                                                                                                                                                                                                                                                                                                                                                                                                                                                                                                                                                                                                                                                                                                                                                                                                                                                                                                                                                                                                                                                                                                                                                                                                                                                                                                                                                                                                                                                                                                                                                                                                                                                                                                                                                                                                                                                                                                                                                                                                                                                                                                                                                                                   |   |                               |             |   |                               |                  |   |                               |                   |   |                               |             |   |                               |                       |   |                               |                      |   |                               |              |   |                               |                                                              |   |                               |                                                |    |                                |                       |    |                                |                             |    |                                |                                                             |    |                                |                                        |    |                                |       |
| 8  | jb_acc_conseq_vie_quot_fam__8                                                                   | On how to announce a diagnosis to your family and loved ones                          |                                                                                                                                                                                                                                                                                                                                                                                                                                                                                                                                                                                                                                                                                                                                                                                                                                                                                                                                                                                                                                                                                                                                                                                                                                                                                                                                                                                                                                                                                                                                                                                                                                                                                                                                                                                                                                                                                                                                                                                                                                                                                                                                                                                                                                                                                                                                                                                                                                                                                                                                                                                                                                                                                                                                                                                   |   |                               |             |   |                               |                  |   |                               |                   |   |                               |             |   |                               |                       |   |                               |                      |   |                               |              |   |                               |                                                              |   |                               |                                                |    |                                |                       |    |                                |                             |    |                                |                                                             |    |                                |                                        |    |                                |       |
| 9  | jb_acc_conseq_vie_quot_fam__9                                                                   | On social perception (the reactions of others)                                        |                                                                                                                                                                                                                                                                                                                                                                                                                                                                                                                                                                                                                                                                                                                                                                                                                                                                                                                                                                                                                                                                                                                                                                                                                                                                                                                                                                                                                                                                                                                                                                                                                                                                                                                                                                                                                                                                                                                                                                                                                                                                                                                                                                                                                                                                                                                                                                                                                                                                                                                                                                                                                                                                                                                                                                                   |   |                               |             |   |                               |                  |   |                               |                   |   |                               |             |   |                               |                       |   |                               |                      |   |                               |              |   |                               |                                                              |   |                               |                                                |    |                                |                       |    |                                |                             |    |                                |                                                             |    |                                |                                        |    |                                |       |
| 10 | jb_acc_conseq_vie_quot_fam__10                                                                  | On the return to work                                                                 |                                                                                                                                                                                                                                                                                                                                                                                                                                                                                                                                                                                                                                                                                                                                                                                                                                                                                                                                                                                                                                                                                                                                                                                                                                                                                                                                                                                                                                                                                                                                                                                                                                                                                                                                                                                                                                                                                                                                                                                                                                                                                                                                                                                                                                                                                                                                                                                                                                                                                                                                                                                                                                                                                                                                                                                   |   |                               |             |   |                               |                  |   |                               |                   |   |                               |             |   |                               |                       |   |                               |                      |   |                               |              |   |                               |                                                              |   |                               |                                                |    |                                |                       |    |                                |                             |    |                                |                                                             |    |                                |                                        |    |                                |       |
| 11 | jb_acc_conseq_vie_quot_fam__11                                                                  | On the return to daily life                                                           |                                                                                                                                                                                                                                                                                                                                                                                                                                                                                                                                                                                                                                                                                                                                                                                                                                                                                                                                                                                                                                                                                                                                                                                                                                                                                                                                                                                                                                                                                                                                                                                                                                                                                                                                                                                                                                                                                                                                                                                                                                                                                                                                                                                                                                                                                                                                                                                                                                                                                                                                                                                                                                                                                                                                                                                   |   |                               |             |   |                               |                  |   |                               |                   |   |                               |             |   |                               |                       |   |                               |                      |   |                               |              |   |                               |                                                              |   |                               |                                                |    |                                |                       |    |                                |                             |    |                                |                                                             |    |                                |                                        |    |                                |       |
| 12 | jb_acc_conseq_vie_quot_fam__12                                                                  | Strategies for living the treatments in the best conditions                           |                                                                                                                                                                                                                                                                                                                                                                                                                                                                                                                                                                                                                                                                                                                                                                                                                                                                                                                                                                                                                                                                                                                                                                                                                                                                                                                                                                                                                                                                                                                                                                                                                                                                                                                                                                                                                                                                                                                                                                                                                                                                                                                                                                                                                                                                                                                                                                                                                                                                                                                                                                                                                                                                                                                                                                                   |   |                               |             |   |                               |                  |   |                               |                   |   |                               |             |   |                               |                       |   |                               |                      |   |                               |              |   |                               |                                                              |   |                               |                                                |    |                                |                       |    |                                |                             |    |                                |                                                             |    |                                |                                        |    |                                |       |
| 13 | jb_acc_conseq_vie_quot_fam__13                                                                  | How to regain control over the disease                                                |                                                                                                                                                                                                                                                                                                                                                                                                                                                                                                                                                                                                                                                                                                                                                                                                                                                                                                                                                                                                                                                                                                                                                                                                                                                                                                                                                                                                                                                                                                                                                                                                                                                                                                                                                                                                                                                                                                                                                                                                                                                                                                                                                                                                                                                                                                                                                                                                                                                                                                                                                                                                                                                                                                                                                                                   |   |                               |             |   |                               |                  |   |                               |                   |   |                               |             |   |                               |                       |   |                               |                      |   |                               |              |   |                               |                                                              |   |                               |                                                |    |                                |                       |    |                                |                             |    |                                |                                                             |    |                                |                                        |    |                                |       |
| 14 | jb_acc_conseq_vie_quot_fam__14                                                                  | Other                                                                                 |                                                                                                                                                                                                                                                                                                                                                                                                                                                                                                                                                                                                                                                                                                                                                                                                                                                                                                                                                                                                                                                                                                                                                                                                                                                                                                                                                                                                                                                                                                                                                                                                                                                                                                                                                                                                                                                                                                                                                                                                                                                                                                                                                                                                                                                                                                                                                                                                                                                                                                                                                                                                                                                                                                                                                                                   |   |                               |             |   |                               |                  |   |                               |                   |   |                               |             |   |                               |                       |   |                               |                      |   |                               |              |   |                               |                                                              |   |                               |                                                |    |                                |                       |    |                                |                             |    |                                |                                                             |    |                                |                                        |    |                                |       |
| 32 | jb_viequot_autre<br>Afficher le champ UNIQUEMENT si :<br>[jb_acc_conseq_vie_quot_fam(14)] = '1' | If you checked "Other", please specify what other topic was covered in this category: | text                                                                                                                                                                                                                                                                                                                                                                                                                                                                                                                                                                                                                                                                                                                                                                                                                                                                                                                                                                                                                                                                                                                                                                                                                                                                                                                                                                                                                                                                                                                                                                                                                                                                                                                                                                                                                                                                                                                                                                                                                                                                                                                                                                                                                                                                                                                                                                                                                                                                                                                                                                                                                                                                                                                                                                              |   |                               |             |   |                               |                  |   |                               |                   |   |                               |             |   |                               |                       |   |                               |                      |   |                               |              |   |                               |                                                              |   |                               |                                                |    |                                |                       |    |                                |                             |    |                                |                                                             |    |                                |                                        |    |                                |       |

|    |                                                                                               |                                                                                                                           |                                                                                                                                                                                                                                                                                                                                                                                                                                                                                                                                                                                                                                                                                                                                                                                                                                                                                                                                                                                                                                                                                                                                                                                                                                                                                                                                                                                                                                                                                                                                                                                                                                                                                                                                                                                                                                                                                                                                                                                                                                                                                                                                                                                                                                                                                                                                                                                                                                                                                                                                                                                                                                                                                                                                                                                                                                                                                                                                                                                                                                                                                                                                                                                                                                                                                                                                                                                                                                                                                                                                                                                               |   |                    |                                                                         |     |                    |        |   |                    |              |   |                    |              |   |                    |                                           |   |                    |                                    |   |                    |                                     |   |                    |                 |   |                    |                 |    |                     |                     |    |                     |                                                |    |                     |                           |    |                     |                                         |    |                     |                              |    |                     |                                   |    |                     |                                     |    |                     |                   |    |                     |                               |    |                     |       |
|----|-----------------------------------------------------------------------------------------------|---------------------------------------------------------------------------------------------------------------------------|-----------------------------------------------------------------------------------------------------------------------------------------------------------------------------------------------------------------------------------------------------------------------------------------------------------------------------------------------------------------------------------------------------------------------------------------------------------------------------------------------------------------------------------------------------------------------------------------------------------------------------------------------------------------------------------------------------------------------------------------------------------------------------------------------------------------------------------------------------------------------------------------------------------------------------------------------------------------------------------------------------------------------------------------------------------------------------------------------------------------------------------------------------------------------------------------------------------------------------------------------------------------------------------------------------------------------------------------------------------------------------------------------------------------------------------------------------------------------------------------------------------------------------------------------------------------------------------------------------------------------------------------------------------------------------------------------------------------------------------------------------------------------------------------------------------------------------------------------------------------------------------------------------------------------------------------------------------------------------------------------------------------------------------------------------------------------------------------------------------------------------------------------------------------------------------------------------------------------------------------------------------------------------------------------------------------------------------------------------------------------------------------------------------------------------------------------------------------------------------------------------------------------------------------------------------------------------------------------------------------------------------------------------------------------------------------------------------------------------------------------------------------------------------------------------------------------------------------------------------------------------------------------------------------------------------------------------------------------------------------------------------------------------------------------------------------------------------------------------------------------------------------------------------------------------------------------------------------------------------------------------------------------------------------------------------------------------------------------------------------------------------------------------------------------------------------------------------------------------------------------------------------------------------------------------------------------------------------------|---|--------------------|-------------------------------------------------------------------------|-----|--------------------|--------|---|--------------------|--------------|---|--------------------|--------------|---|--------------------|-------------------------------------------|---|--------------------|------------------------------------|---|--------------------|-------------------------------------|---|--------------------|-----------------|---|--------------------|-----------------|----|---------------------|---------------------|----|---------------------|------------------------------------------------|----|---------------------|---------------------------|----|---------------------|-----------------------------------------|----|---------------------|------------------------------|----|---------------------|-----------------------------------|----|---------------------|-------------------------------------|----|---------------------|-------------------|----|---------------------|-------------------------------|----|---------------------|-------|
| 33 | jb_acc_asp_clin                                                                               | CLINICAL ASPECTS                                                                                                          | checkbox<br><table border="1"> <tr> <td data-bbox="1023 114 1054 226">1</td> <td data-bbox="1054 114 1254 226">jb_acc_asp_clin__1</td> <td data-bbox="1254 114 1493 226">Announcement of cancer diagnosis / genetic predisposition by the doctor</td> </tr> <tr> <td data-bbox="1023 226 1054 264">2</td> <td data-bbox="1054 226 1254 264">jb_acc_asp_clin__2</td> <td data-bbox="1254 226 1493 264">Cancer</td> </tr> <tr> <td data-bbox="1023 264 1054 302">3</td> <td data-bbox="1054 264 1254 302">jb_acc_asp_clin__3</td> <td data-bbox="1254 264 1493 302">Oncogenetics</td> </tr> <tr> <td data-bbox="1023 302 1054 340">4</td> <td data-bbox="1054 302 1254 340">jb_acc_asp_clin__4</td> <td data-bbox="1254 302 1493 340">Genetic Test</td> </tr> <tr> <td data-bbox="1023 340 1054 409">5</td> <td data-bbox="1054 340 1254 409">jb_acc_asp_clin__5</td> <td data-bbox="1254 340 1493 409">Therapeutic options in the case of cancer</td> </tr> <tr> <td data-bbox="1023 409 1054 479">6</td> <td data-bbox="1054 409 1254 479">jb_acc_asp_clin__6</td> <td data-bbox="1254 409 1493 479">Reducing risk in mutation carriers</td> </tr> <tr> <td data-bbox="1023 479 1054 548">7</td> <td data-bbox="1054 479 1254 548">jb_acc_asp_clin__7</td> <td data-bbox="1254 479 1493 548">Surgical and reconstructive options</td> </tr> <tr> <td data-bbox="1023 548 1054 586">8</td> <td data-bbox="1054 548 1254 586">jb_acc_asp_clin__8</td> <td data-bbox="1254 548 1493 586">Breast implants</td> </tr> <tr> <td data-bbox="1023 586 1054 624">9</td> <td data-bbox="1054 586 1254 624">jb_acc_asp_clin__9</td> <td data-bbox="1254 586 1493 624">Hormonal issues</td> </tr> <tr> <td data-bbox="1023 624 1054 663">10</td> <td data-bbox="1054 624 1254 663">jb_acc_asp_clin__10</td> <td data-bbox="1254 624 1493 663">Reproductive issues</td> </tr> <tr> <td data-bbox="1023 663 1054 745">11</td> <td data-bbox="1054 663 1254 745">jb_acc_asp_clin__11</td> <td data-bbox="1254 663 1493 745">Impacts on Physical Appearance and Self-Esteem</td> </tr> <tr> <td data-bbox="1023 745 1054 815">12</td> <td data-bbox="1054 745 1254 815">jb_acc_asp_clin__12</td> <td data-bbox="1254 745 1493 815">Decision-making processes</td> </tr> <tr> <td data-bbox="1023 815 1054 884">13</td> <td data-bbox="1054 815 1254 884">jb_acc_asp_clin__13</td> <td data-bbox="1254 815 1493 884">Urinary and erectile dysfunction issues</td> </tr> <tr> <td data-bbox="1023 884 1054 954">14</td> <td data-bbox="1054 884 1254 954">jb_acc_asp_clin__14</td> <td data-bbox="1254 884 1493 954">Fatigue following treatments</td> </tr> <tr> <td data-bbox="1023 954 1054 1023">15</td> <td data-bbox="1054 954 1254 1023">jb_acc_asp_clin__15</td> <td data-bbox="1254 954 1493 1023">Pain and discomfort after surgery</td> </tr> <tr> <td data-bbox="1023 1023 1054 1093">16</td> <td data-bbox="1054 1023 1254 1093">jb_acc_asp_clin__16</td> <td data-bbox="1254 1023 1493 1093">Pain and discomfort after treatment</td> </tr> <tr> <td data-bbox="1023 1093 1054 1131">17</td> <td data-bbox="1054 1093 1254 1131">jb_acc_asp_clin__17</td> <td data-bbox="1254 1093 1493 1131">Possible emotions</td> </tr> <tr> <td data-bbox="1023 1131 1054 1200">18</td> <td data-bbox="1054 1131 1254 1200">jb_acc_asp_clin__18</td> <td data-bbox="1254 1131 1493 1200">Stress and anxiety management</td> </tr> <tr> <td data-bbox="1023 1200 1054 1220">19</td> <td data-bbox="1054 1200 1254 1220">jb_acc_asp_clin__19</td> <td data-bbox="1254 1200 1493 1220">Other</td> </tr> </table> | 1 | jb_acc_asp_clin__1 | Announcement of cancer diagnosis / genetic predisposition by the doctor | 2   | jb_acc_asp_clin__2 | Cancer | 3 | jb_acc_asp_clin__3 | Oncogenetics | 4 | jb_acc_asp_clin__4 | Genetic Test | 5 | jb_acc_asp_clin__5 | Therapeutic options in the case of cancer | 6 | jb_acc_asp_clin__6 | Reducing risk in mutation carriers | 7 | jb_acc_asp_clin__7 | Surgical and reconstructive options | 8 | jb_acc_asp_clin__8 | Breast implants | 9 | jb_acc_asp_clin__9 | Hormonal issues | 10 | jb_acc_asp_clin__10 | Reproductive issues | 11 | jb_acc_asp_clin__11 | Impacts on Physical Appearance and Self-Esteem | 12 | jb_acc_asp_clin__12 | Decision-making processes | 13 | jb_acc_asp_clin__13 | Urinary and erectile dysfunction issues | 14 | jb_acc_asp_clin__14 | Fatigue following treatments | 15 | jb_acc_asp_clin__15 | Pain and discomfort after surgery | 16 | jb_acc_asp_clin__16 | Pain and discomfort after treatment | 17 | jb_acc_asp_clin__17 | Possible emotions | 18 | jb_acc_asp_clin__18 | Stress and anxiety management | 19 | jb_acc_asp_clin__19 | Other |
| 1  | jb_acc_asp_clin__1                                                                            | Announcement of cancer diagnosis / genetic predisposition by the doctor                                                   |                                                                                                                                                                                                                                                                                                                                                                                                                                                                                                                                                                                                                                                                                                                                                                                                                                                                                                                                                                                                                                                                                                                                                                                                                                                                                                                                                                                                                                                                                                                                                                                                                                                                                                                                                                                                                                                                                                                                                                                                                                                                                                                                                                                                                                                                                                                                                                                                                                                                                                                                                                                                                                                                                                                                                                                                                                                                                                                                                                                                                                                                                                                                                                                                                                                                                                                                                                                                                                                                                                                                                                                               |   |                    |                                                                         |     |                    |        |   |                    |              |   |                    |              |   |                    |                                           |   |                    |                                    |   |                    |                                     |   |                    |                 |   |                    |                 |    |                     |                     |    |                     |                                                |    |                     |                           |    |                     |                                         |    |                     |                              |    |                     |                                   |    |                     |                                     |    |                     |                   |    |                     |                               |    |                     |       |
| 2  | jb_acc_asp_clin__2                                                                            | Cancer                                                                                                                    |                                                                                                                                                                                                                                                                                                                                                                                                                                                                                                                                                                                                                                                                                                                                                                                                                                                                                                                                                                                                                                                                                                                                                                                                                                                                                                                                                                                                                                                                                                                                                                                                                                                                                                                                                                                                                                                                                                                                                                                                                                                                                                                                                                                                                                                                                                                                                                                                                                                                                                                                                                                                                                                                                                                                                                                                                                                                                                                                                                                                                                                                                                                                                                                                                                                                                                                                                                                                                                                                                                                                                                                               |   |                    |                                                                         |     |                    |        |   |                    |              |   |                    |              |   |                    |                                           |   |                    |                                    |   |                    |                                     |   |                    |                 |   |                    |                 |    |                     |                     |    |                     |                                                |    |                     |                           |    |                     |                                         |    |                     |                              |    |                     |                                   |    |                     |                                     |    |                     |                   |    |                     |                               |    |                     |       |
| 3  | jb_acc_asp_clin__3                                                                            | Oncogenetics                                                                                                              |                                                                                                                                                                                                                                                                                                                                                                                                                                                                                                                                                                                                                                                                                                                                                                                                                                                                                                                                                                                                                                                                                                                                                                                                                                                                                                                                                                                                                                                                                                                                                                                                                                                                                                                                                                                                                                                                                                                                                                                                                                                                                                                                                                                                                                                                                                                                                                                                                                                                                                                                                                                                                                                                                                                                                                                                                                                                                                                                                                                                                                                                                                                                                                                                                                                                                                                                                                                                                                                                                                                                                                                               |   |                    |                                                                         |     |                    |        |   |                    |              |   |                    |              |   |                    |                                           |   |                    |                                    |   |                    |                                     |   |                    |                 |   |                    |                 |    |                     |                     |    |                     |                                                |    |                     |                           |    |                     |                                         |    |                     |                              |    |                     |                                   |    |                     |                                     |    |                     |                   |    |                     |                               |    |                     |       |
| 4  | jb_acc_asp_clin__4                                                                            | Genetic Test                                                                                                              |                                                                                                                                                                                                                                                                                                                                                                                                                                                                                                                                                                                                                                                                                                                                                                                                                                                                                                                                                                                                                                                                                                                                                                                                                                                                                                                                                                                                                                                                                                                                                                                                                                                                                                                                                                                                                                                                                                                                                                                                                                                                                                                                                                                                                                                                                                                                                                                                                                                                                                                                                                                                                                                                                                                                                                                                                                                                                                                                                                                                                                                                                                                                                                                                                                                                                                                                                                                                                                                                                                                                                                                               |   |                    |                                                                         |     |                    |        |   |                    |              |   |                    |              |   |                    |                                           |   |                    |                                    |   |                    |                                     |   |                    |                 |   |                    |                 |    |                     |                     |    |                     |                                                |    |                     |                           |    |                     |                                         |    |                     |                              |    |                     |                                   |    |                     |                                     |    |                     |                   |    |                     |                               |    |                     |       |
| 5  | jb_acc_asp_clin__5                                                                            | Therapeutic options in the case of cancer                                                                                 |                                                                                                                                                                                                                                                                                                                                                                                                                                                                                                                                                                                                                                                                                                                                                                                                                                                                                                                                                                                                                                                                                                                                                                                                                                                                                                                                                                                                                                                                                                                                                                                                                                                                                                                                                                                                                                                                                                                                                                                                                                                                                                                                                                                                                                                                                                                                                                                                                                                                                                                                                                                                                                                                                                                                                                                                                                                                                                                                                                                                                                                                                                                                                                                                                                                                                                                                                                                                                                                                                                                                                                                               |   |                    |                                                                         |     |                    |        |   |                    |              |   |                    |              |   |                    |                                           |   |                    |                                    |   |                    |                                     |   |                    |                 |   |                    |                 |    |                     |                     |    |                     |                                                |    |                     |                           |    |                     |                                         |    |                     |                              |    |                     |                                   |    |                     |                                     |    |                     |                   |    |                     |                               |    |                     |       |
| 6  | jb_acc_asp_clin__6                                                                            | Reducing risk in mutation carriers                                                                                        |                                                                                                                                                                                                                                                                                                                                                                                                                                                                                                                                                                                                                                                                                                                                                                                                                                                                                                                                                                                                                                                                                                                                                                                                                                                                                                                                                                                                                                                                                                                                                                                                                                                                                                                                                                                                                                                                                                                                                                                                                                                                                                                                                                                                                                                                                                                                                                                                                                                                                                                                                                                                                                                                                                                                                                                                                                                                                                                                                                                                                                                                                                                                                                                                                                                                                                                                                                                                                                                                                                                                                                                               |   |                    |                                                                         |     |                    |        |   |                    |              |   |                    |              |   |                    |                                           |   |                    |                                    |   |                    |                                     |   |                    |                 |   |                    |                 |    |                     |                     |    |                     |                                                |    |                     |                           |    |                     |                                         |    |                     |                              |    |                     |                                   |    |                     |                                     |    |                     |                   |    |                     |                               |    |                     |       |
| 7  | jb_acc_asp_clin__7                                                                            | Surgical and reconstructive options                                                                                       |                                                                                                                                                                                                                                                                                                                                                                                                                                                                                                                                                                                                                                                                                                                                                                                                                                                                                                                                                                                                                                                                                                                                                                                                                                                                                                                                                                                                                                                                                                                                                                                                                                                                                                                                                                                                                                                                                                                                                                                                                                                                                                                                                                                                                                                                                                                                                                                                                                                                                                                                                                                                                                                                                                                                                                                                                                                                                                                                                                                                                                                                                                                                                                                                                                                                                                                                                                                                                                                                                                                                                                                               |   |                    |                                                                         |     |                    |        |   |                    |              |   |                    |              |   |                    |                                           |   |                    |                                    |   |                    |                                     |   |                    |                 |   |                    |                 |    |                     |                     |    |                     |                                                |    |                     |                           |    |                     |                                         |    |                     |                              |    |                     |                                   |    |                     |                                     |    |                     |                   |    |                     |                               |    |                     |       |
| 8  | jb_acc_asp_clin__8                                                                            | Breast implants                                                                                                           |                                                                                                                                                                                                                                                                                                                                                                                                                                                                                                                                                                                                                                                                                                                                                                                                                                                                                                                                                                                                                                                                                                                                                                                                                                                                                                                                                                                                                                                                                                                                                                                                                                                                                                                                                                                                                                                                                                                                                                                                                                                                                                                                                                                                                                                                                                                                                                                                                                                                                                                                                                                                                                                                                                                                                                                                                                                                                                                                                                                                                                                                                                                                                                                                                                                                                                                                                                                                                                                                                                                                                                                               |   |                    |                                                                         |     |                    |        |   |                    |              |   |                    |              |   |                    |                                           |   |                    |                                    |   |                    |                                     |   |                    |                 |   |                    |                 |    |                     |                     |    |                     |                                                |    |                     |                           |    |                     |                                         |    |                     |                              |    |                     |                                   |    |                     |                                     |    |                     |                   |    |                     |                               |    |                     |       |
| 9  | jb_acc_asp_clin__9                                                                            | Hormonal issues                                                                                                           |                                                                                                                                                                                                                                                                                                                                                                                                                                                                                                                                                                                                                                                                                                                                                                                                                                                                                                                                                                                                                                                                                                                                                                                                                                                                                                                                                                                                                                                                                                                                                                                                                                                                                                                                                                                                                                                                                                                                                                                                                                                                                                                                                                                                                                                                                                                                                                                                                                                                                                                                                                                                                                                                                                                                                                                                                                                                                                                                                                                                                                                                                                                                                                                                                                                                                                                                                                                                                                                                                                                                                                                               |   |                    |                                                                         |     |                    |        |   |                    |              |   |                    |              |   |                    |                                           |   |                    |                                    |   |                    |                                     |   |                    |                 |   |                    |                 |    |                     |                     |    |                     |                                                |    |                     |                           |    |                     |                                         |    |                     |                              |    |                     |                                   |    |                     |                                     |    |                     |                   |    |                     |                               |    |                     |       |
| 10 | jb_acc_asp_clin__10                                                                           | Reproductive issues                                                                                                       |                                                                                                                                                                                                                                                                                                                                                                                                                                                                                                                                                                                                                                                                                                                                                                                                                                                                                                                                                                                                                                                                                                                                                                                                                                                                                                                                                                                                                                                                                                                                                                                                                                                                                                                                                                                                                                                                                                                                                                                                                                                                                                                                                                                                                                                                                                                                                                                                                                                                                                                                                                                                                                                                                                                                                                                                                                                                                                                                                                                                                                                                                                                                                                                                                                                                                                                                                                                                                                                                                                                                                                                               |   |                    |                                                                         |     |                    |        |   |                    |              |   |                    |              |   |                    |                                           |   |                    |                                    |   |                    |                                     |   |                    |                 |   |                    |                 |    |                     |                     |    |                     |                                                |    |                     |                           |    |                     |                                         |    |                     |                              |    |                     |                                   |    |                     |                                     |    |                     |                   |    |                     |                               |    |                     |       |
| 11 | jb_acc_asp_clin__11                                                                           | Impacts on Physical Appearance and Self-Esteem                                                                            |                                                                                                                                                                                                                                                                                                                                                                                                                                                                                                                                                                                                                                                                                                                                                                                                                                                                                                                                                                                                                                                                                                                                                                                                                                                                                                                                                                                                                                                                                                                                                                                                                                                                                                                                                                                                                                                                                                                                                                                                                                                                                                                                                                                                                                                                                                                                                                                                                                                                                                                                                                                                                                                                                                                                                                                                                                                                                                                                                                                                                                                                                                                                                                                                                                                                                                                                                                                                                                                                                                                                                                                               |   |                    |                                                                         |     |                    |        |   |                    |              |   |                    |              |   |                    |                                           |   |                    |                                    |   |                    |                                     |   |                    |                 |   |                    |                 |    |                     |                     |    |                     |                                                |    |                     |                           |    |                     |                                         |    |                     |                              |    |                     |                                   |    |                     |                                     |    |                     |                   |    |                     |                               |    |                     |       |
| 12 | jb_acc_asp_clin__12                                                                           | Decision-making processes                                                                                                 |                                                                                                                                                                                                                                                                                                                                                                                                                                                                                                                                                                                                                                                                                                                                                                                                                                                                                                                                                                                                                                                                                                                                                                                                                                                                                                                                                                                                                                                                                                                                                                                                                                                                                                                                                                                                                                                                                                                                                                                                                                                                                                                                                                                                                                                                                                                                                                                                                                                                                                                                                                                                                                                                                                                                                                                                                                                                                                                                                                                                                                                                                                                                                                                                                                                                                                                                                                                                                                                                                                                                                                                               |   |                    |                                                                         |     |                    |        |   |                    |              |   |                    |              |   |                    |                                           |   |                    |                                    |   |                    |                                     |   |                    |                 |   |                    |                 |    |                     |                     |    |                     |                                                |    |                     |                           |    |                     |                                         |    |                     |                              |    |                     |                                   |    |                     |                                     |    |                     |                   |    |                     |                               |    |                     |       |
| 13 | jb_acc_asp_clin__13                                                                           | Urinary and erectile dysfunction issues                                                                                   |                                                                                                                                                                                                                                                                                                                                                                                                                                                                                                                                                                                                                                                                                                                                                                                                                                                                                                                                                                                                                                                                                                                                                                                                                                                                                                                                                                                                                                                                                                                                                                                                                                                                                                                                                                                                                                                                                                                                                                                                                                                                                                                                                                                                                                                                                                                                                                                                                                                                                                                                                                                                                                                                                                                                                                                                                                                                                                                                                                                                                                                                                                                                                                                                                                                                                                                                                                                                                                                                                                                                                                                               |   |                    |                                                                         |     |                    |        |   |                    |              |   |                    |              |   |                    |                                           |   |                    |                                    |   |                    |                                     |   |                    |                 |   |                    |                 |    |                     |                     |    |                     |                                                |    |                     |                           |    |                     |                                         |    |                     |                              |    |                     |                                   |    |                     |                                     |    |                     |                   |    |                     |                               |    |                     |       |
| 14 | jb_acc_asp_clin__14                                                                           | Fatigue following treatments                                                                                              |                                                                                                                                                                                                                                                                                                                                                                                                                                                                                                                                                                                                                                                                                                                                                                                                                                                                                                                                                                                                                                                                                                                                                                                                                                                                                                                                                                                                                                                                                                                                                                                                                                                                                                                                                                                                                                                                                                                                                                                                                                                                                                                                                                                                                                                                                                                                                                                                                                                                                                                                                                                                                                                                                                                                                                                                                                                                                                                                                                                                                                                                                                                                                                                                                                                                                                                                                                                                                                                                                                                                                                                               |   |                    |                                                                         |     |                    |        |   |                    |              |   |                    |              |   |                    |                                           |   |                    |                                    |   |                    |                                     |   |                    |                 |   |                    |                 |    |                     |                     |    |                     |                                                |    |                     |                           |    |                     |                                         |    |                     |                              |    |                     |                                   |    |                     |                                     |    |                     |                   |    |                     |                               |    |                     |       |
| 15 | jb_acc_asp_clin__15                                                                           | Pain and discomfort after surgery                                                                                         |                                                                                                                                                                                                                                                                                                                                                                                                                                                                                                                                                                                                                                                                                                                                                                                                                                                                                                                                                                                                                                                                                                                                                                                                                                                                                                                                                                                                                                                                                                                                                                                                                                                                                                                                                                                                                                                                                                                                                                                                                                                                                                                                                                                                                                                                                                                                                                                                                                                                                                                                                                                                                                                                                                                                                                                                                                                                                                                                                                                                                                                                                                                                                                                                                                                                                                                                                                                                                                                                                                                                                                                               |   |                    |                                                                         |     |                    |        |   |                    |              |   |                    |              |   |                    |                                           |   |                    |                                    |   |                    |                                     |   |                    |                 |   |                    |                 |    |                     |                     |    |                     |                                                |    |                     |                           |    |                     |                                         |    |                     |                              |    |                     |                                   |    |                     |                                     |    |                     |                   |    |                     |                               |    |                     |       |
| 16 | jb_acc_asp_clin__16                                                                           | Pain and discomfort after treatment                                                                                       |                                                                                                                                                                                                                                                                                                                                                                                                                                                                                                                                                                                                                                                                                                                                                                                                                                                                                                                                                                                                                                                                                                                                                                                                                                                                                                                                                                                                                                                                                                                                                                                                                                                                                                                                                                                                                                                                                                                                                                                                                                                                                                                                                                                                                                                                                                                                                                                                                                                                                                                                                                                                                                                                                                                                                                                                                                                                                                                                                                                                                                                                                                                                                                                                                                                                                                                                                                                                                                                                                                                                                                                               |   |                    |                                                                         |     |                    |        |   |                    |              |   |                    |              |   |                    |                                           |   |                    |                                    |   |                    |                                     |   |                    |                 |   |                    |                 |    |                     |                     |    |                     |                                                |    |                     |                           |    |                     |                                         |    |                     |                              |    |                     |                                   |    |                     |                                     |    |                     |                   |    |                     |                               |    |                     |       |
| 17 | jb_acc_asp_clin__17                                                                           | Possible emotions                                                                                                         |                                                                                                                                                                                                                                                                                                                                                                                                                                                                                                                                                                                                                                                                                                                                                                                                                                                                                                                                                                                                                                                                                                                                                                                                                                                                                                                                                                                                                                                                                                                                                                                                                                                                                                                                                                                                                                                                                                                                                                                                                                                                                                                                                                                                                                                                                                                                                                                                                                                                                                                                                                                                                                                                                                                                                                                                                                                                                                                                                                                                                                                                                                                                                                                                                                                                                                                                                                                                                                                                                                                                                                                               |   |                    |                                                                         |     |                    |        |   |                    |              |   |                    |              |   |                    |                                           |   |                    |                                    |   |                    |                                     |   |                    |                 |   |                    |                 |    |                     |                     |    |                     |                                                |    |                     |                           |    |                     |                                         |    |                     |                              |    |                     |                                   |    |                     |                                     |    |                     |                   |    |                     |                               |    |                     |       |
| 18 | jb_acc_asp_clin__18                                                                           | Stress and anxiety management                                                                                             |                                                                                                                                                                                                                                                                                                                                                                                                                                                                                                                                                                                                                                                                                                                                                                                                                                                                                                                                                                                                                                                                                                                                                                                                                                                                                                                                                                                                                                                                                                                                                                                                                                                                                                                                                                                                                                                                                                                                                                                                                                                                                                                                                                                                                                                                                                                                                                                                                                                                                                                                                                                                                                                                                                                                                                                                                                                                                                                                                                                                                                                                                                                                                                                                                                                                                                                                                                                                                                                                                                                                                                                               |   |                    |                                                                         |     |                    |        |   |                    |              |   |                    |              |   |                    |                                           |   |                    |                                    |   |                    |                                     |   |                    |                 |   |                    |                 |    |                     |                     |    |                     |                                                |    |                     |                           |    |                     |                                         |    |                     |                              |    |                     |                                   |    |                     |                                     |    |                     |                   |    |                     |                               |    |                     |       |
| 19 | jb_acc_asp_clin__19                                                                           | Other                                                                                                                     |                                                                                                                                                                                                                                                                                                                                                                                                                                                                                                                                                                                                                                                                                                                                                                                                                                                                                                                                                                                                                                                                                                                                                                                                                                                                                                                                                                                                                                                                                                                                                                                                                                                                                                                                                                                                                                                                                                                                                                                                                                                                                                                                                                                                                                                                                                                                                                                                                                                                                                                                                                                                                                                                                                                                                                                                                                                                                                                                                                                                                                                                                                                                                                                                                                                                                                                                                                                                                                                                                                                                                                                               |   |                    |                                                                         |     |                    |        |   |                    |              |   |                    |              |   |                    |                                           |   |                    |                                    |   |                    |                                     |   |                    |                 |   |                    |                 |    |                     |                     |    |                     |                                                |    |                     |                           |    |                     |                                         |    |                     |                              |    |                     |                                   |    |                     |                                     |    |                     |                   |    |                     |                               |    |                     |       |
| 34 | jb_clin_autre<br>Afficher le champ UNIQUEM<br>ENT si :<br>[jb_acc_asp_clin(19)] = '1'         | If you checked "Other", please specify what other topic was covered in this category:                                     | text                                                                                                                                                                                                                                                                                                                                                                                                                                                                                                                                                                                                                                                                                                                                                                                                                                                                                                                                                                                                                                                                                                                                                                                                                                                                                                                                                                                                                                                                                                                                                                                                                                                                                                                                                                                                                                                                                                                                                                                                                                                                                                                                                                                                                                                                                                                                                                                                                                                                                                                                                                                                                                                                                                                                                                                                                                                                                                                                                                                                                                                                                                                                                                                                                                                                                                                                                                                                                                                                                                                                                                                          |   |                    |                                                                         |     |                    |        |   |                    |              |   |                    |              |   |                    |                                           |   |                    |                                    |   |                    |                                     |   |                    |                 |   |                    |                 |    |                     |                     |    |                     |                                                |    |                     |                           |    |                     |                                         |    |                     |                              |    |                     |                                   |    |                     |                                     |    |                     |                   |    |                     |                               |    |                     |       |
| 35 | jb_acc_diff                                                                                   | En-tête de section : <i>FOLLOW-UP OF THE INTERVENTION</i><br>Did you encounter any difficulties during the accompaniment? | radio<br><table border="1"> <tr> <td data-bbox="1023 1386 1054 1424">0</td> <td data-bbox="1054 1386 1094 1424">No</td> </tr> <tr> <td data-bbox="1023 1424 1054 1462">1</td> <td data-bbox="1054 1424 1094 1462">Yes</td> </tr> </table>                                                                                                                                                                                                                                                                                                                                                                                                                                                                                                                                                                                                                                                                                                                                                                                                                                                                                                                                                                                                                                                                                                                                                                                                                                                                                                                                                                                                                                                                                                                                                                                                                                                                                                                                                                                                                                                                                                                                                                                                                                                                                                                                                                                                                                                                                                                                                                                                                                                                                                                                                                                                                                                                                                                                                                                                                                                                                                                                                                                                                                                                                                                                                                                                                                                                                                                                                     | 0 | No                 | 1                                                                       | Yes |                    |        |   |                    |              |   |                    |              |   |                    |                                           |   |                    |                                    |   |                    |                                     |   |                    |                 |   |                    |                 |    |                     |                     |    |                     |                                                |    |                     |                           |    |                     |                                         |    |                     |                              |    |                     |                                   |    |                     |                                     |    |                     |                   |    |                     |                               |    |                     |       |
| 0  | No                                                                                            |                                                                                                                           |                                                                                                                                                                                                                                                                                                                                                                                                                                                                                                                                                                                                                                                                                                                                                                                                                                                                                                                                                                                                                                                                                                                                                                                                                                                                                                                                                                                                                                                                                                                                                                                                                                                                                                                                                                                                                                                                                                                                                                                                                                                                                                                                                                                                                                                                                                                                                                                                                                                                                                                                                                                                                                                                                                                                                                                                                                                                                                                                                                                                                                                                                                                                                                                                                                                                                                                                                                                                                                                                                                                                                                                               |   |                    |                                                                         |     |                    |        |   |                    |              |   |                    |              |   |                    |                                           |   |                    |                                    |   |                    |                                     |   |                    |                 |   |                    |                 |    |                     |                     |    |                     |                                                |    |                     |                           |    |                     |                                         |    |                     |                              |    |                     |                                   |    |                     |                                     |    |                     |                   |    |                     |                               |    |                     |       |
| 1  | Yes                                                                                           |                                                                                                                           |                                                                                                                                                                                                                                                                                                                                                                                                                                                                                                                                                                                                                                                                                                                                                                                                                                                                                                                                                                                                                                                                                                                                                                                                                                                                                                                                                                                                                                                                                                                                                                                                                                                                                                                                                                                                                                                                                                                                                                                                                                                                                                                                                                                                                                                                                                                                                                                                                                                                                                                                                                                                                                                                                                                                                                                                                                                                                                                                                                                                                                                                                                                                                                                                                                                                                                                                                                                                                                                                                                                                                                                               |   |                    |                                                                         |     |                    |        |   |                    |              |   |                    |              |   |                    |                                           |   |                    |                                    |   |                    |                                     |   |                    |                 |   |                    |                 |    |                     |                     |    |                     |                                                |    |                     |                           |    |                     |                                         |    |                     |                              |    |                     |                                   |    |                     |                                     |    |                     |                   |    |                     |                               |    |                     |       |
| 36 | jb_acc_diff_lesquelles<br>Afficher le champ UNIQUEM<br>ENT si :<br>[jb_acc_diff] = '1'        | If yes, which ones?                                                                                                       | notes                                                                                                                                                                                                                                                                                                                                                                                                                                                                                                                                                                                                                                                                                                                                                                                                                                                                                                                                                                                                                                                                                                                                                                                                                                                                                                                                                                                                                                                                                                                                                                                                                                                                                                                                                                                                                                                                                                                                                                                                                                                                                                                                                                                                                                                                                                                                                                                                                                                                                                                                                                                                                                                                                                                                                                                                                                                                                                                                                                                                                                                                                                                                                                                                                                                                                                                                                                                                                                                                                                                                                                                         |   |                    |                                                                         |     |                    |        |   |                    |              |   |                    |              |   |                    |                                           |   |                    |                                    |   |                    |                                     |   |                    |                 |   |                    |                 |    |                     |                     |    |                     |                                                |    |                     |                           |    |                     |                                         |    |                     |                              |    |                     |                                   |    |                     |                                     |    |                     |                   |    |                     |                               |    |                     |       |
| 37 | jb_acc_quest_non_rep                                                                          | Are there any questions you couldn't answer?                                                                              | radio<br><table border="1"> <tr> <td data-bbox="1023 1639 1054 1677">0</td> <td data-bbox="1054 1639 1094 1677">No</td> </tr> <tr> <td data-bbox="1023 1677 1054 1715">1</td> <td data-bbox="1054 1677 1094 1715">Yes</td> </tr> </table>                                                                                                                                                                                                                                                                                                                                                                                                                                                                                                                                                                                                                                                                                                                                                                                                                                                                                                                                                                                                                                                                                                                                                                                                                                                                                                                                                                                                                                                                                                                                                                                                                                                                                                                                                                                                                                                                                                                                                                                                                                                                                                                                                                                                                                                                                                                                                                                                                                                                                                                                                                                                                                                                                                                                                                                                                                                                                                                                                                                                                                                                                                                                                                                                                                                                                                                                                     | 0 | No                 | 1                                                                       | Yes |                    |        |   |                    |              |   |                    |              |   |                    |                                           |   |                    |                                    |   |                    |                                     |   |                    |                 |   |                    |                 |    |                     |                     |    |                     |                                                |    |                     |                           |    |                     |                                         |    |                     |                              |    |                     |                                   |    |                     |                                     |    |                     |                   |    |                     |                               |    |                     |       |
| 0  | No                                                                                            |                                                                                                                           |                                                                                                                                                                                                                                                                                                                                                                                                                                                                                                                                                                                                                                                                                                                                                                                                                                                                                                                                                                                                                                                                                                                                                                                                                                                                                                                                                                                                                                                                                                                                                                                                                                                                                                                                                                                                                                                                                                                                                                                                                                                                                                                                                                                                                                                                                                                                                                                                                                                                                                                                                                                                                                                                                                                                                                                                                                                                                                                                                                                                                                                                                                                                                                                                                                                                                                                                                                                                                                                                                                                                                                                               |   |                    |                                                                         |     |                    |        |   |                    |              |   |                    |              |   |                    |                                           |   |                    |                                    |   |                    |                                     |   |                    |                 |   |                    |                 |    |                     |                     |    |                     |                                                |    |                     |                           |    |                     |                                         |    |                     |                              |    |                     |                                   |    |                     |                                     |    |                     |                   |    |                     |                               |    |                     |       |
| 1  | Yes                                                                                           |                                                                                                                           |                                                                                                                                                                                                                                                                                                                                                                                                                                                                                                                                                                                                                                                                                                                                                                                                                                                                                                                                                                                                                                                                                                                                                                                                                                                                                                                                                                                                                                                                                                                                                                                                                                                                                                                                                                                                                                                                                                                                                                                                                                                                                                                                                                                                                                                                                                                                                                                                                                                                                                                                                                                                                                                                                                                                                                                                                                                                                                                                                                                                                                                                                                                                                                                                                                                                                                                                                                                                                                                                                                                                                                                               |   |                    |                                                                         |     |                    |        |   |                    |              |   |                    |              |   |                    |                                           |   |                    |                                    |   |                    |                                     |   |                    |                 |   |                    |                 |    |                     |                     |    |                     |                                                |    |                     |                           |    |                     |                                         |    |                     |                              |    |                     |                                   |    |                     |                                     |    |                     |                   |    |                     |                               |    |                     |       |
| 38 | jb_acc_ques_lesquel<br>Afficher le champ UNIQUEM<br>ENT si :<br>[jb_acc_quest_non_rep] = '1'  | If yes, which ones?                                                                                                       | notes                                                                                                                                                                                                                                                                                                                                                                                                                                                                                                                                                                                                                                                                                                                                                                                                                                                                                                                                                                                                                                                                                                                                                                                                                                                                                                                                                                                                                                                                                                                                                                                                                                                                                                                                                                                                                                                                                                                                                                                                                                                                                                                                                                                                                                                                                                                                                                                                                                                                                                                                                                                                                                                                                                                                                                                                                                                                                                                                                                                                                                                                                                                                                                                                                                                                                                                                                                                                                                                                                                                                                                                         |   |                    |                                                                         |     |                    |        |   |                    |              |   |                    |              |   |                    |                                           |   |                    |                                    |   |                    |                                     |   |                    |                 |   |                    |                 |    |                     |                     |    |                     |                                                |    |                     |                           |    |                     |                                         |    |                     |                              |    |                     |                                   |    |                     |                                     |    |                     |                   |    |                     |                               |    |                     |       |
| 39 | jb_acc_retour_equipe                                                                          | Is a feedback to the clinical team being considered?                                                                      | radio<br><table border="1"> <tr> <td data-bbox="1023 1888 1054 1926">0</td> <td data-bbox="1054 1888 1094 1926">No</td> </tr> <tr> <td data-bbox="1023 1926 1054 1964">1</td> <td data-bbox="1054 1926 1094 1964">Yes</td> </tr> </table>                                                                                                                                                                                                                                                                                                                                                                                                                                                                                                                                                                                                                                                                                                                                                                                                                                                                                                                                                                                                                                                                                                                                                                                                                                                                                                                                                                                                                                                                                                                                                                                                                                                                                                                                                                                                                                                                                                                                                                                                                                                                                                                                                                                                                                                                                                                                                                                                                                                                                                                                                                                                                                                                                                                                                                                                                                                                                                                                                                                                                                                                                                                                                                                                                                                                                                                                                     | 0 | No                 | 1                                                                       | Yes |                    |        |   |                    |              |   |                    |              |   |                    |                                           |   |                    |                                    |   |                    |                                     |   |                    |                 |   |                    |                 |    |                     |                     |    |                     |                                                |    |                     |                           |    |                     |                                         |    |                     |                              |    |                     |                                   |    |                     |                                     |    |                     |                   |    |                     |                               |    |                     |       |
| 0  | No                                                                                            |                                                                                                                           |                                                                                                                                                                                                                                                                                                                                                                                                                                                                                                                                                                                                                                                                                                                                                                                                                                                                                                                                                                                                                                                                                                                                                                                                                                                                                                                                                                                                                                                                                                                                                                                                                                                                                                                                                                                                                                                                                                                                                                                                                                                                                                                                                                                                                                                                                                                                                                                                                                                                                                                                                                                                                                                                                                                                                                                                                                                                                                                                                                                                                                                                                                                                                                                                                                                                                                                                                                                                                                                                                                                                                                                               |   |                    |                                                                         |     |                    |        |   |                    |              |   |                    |              |   |                    |                                           |   |                    |                                    |   |                    |                                     |   |                    |                 |   |                    |                 |    |                     |                     |    |                     |                                                |    |                     |                           |    |                     |                                         |    |                     |                              |    |                     |                                   |    |                     |                                     |    |                     |                   |    |                     |                               |    |                     |       |
| 1  | Yes                                                                                           |                                                                                                                           |                                                                                                                                                                                                                                                                                                                                                                                                                                                                                                                                                                                                                                                                                                                                                                                                                                                                                                                                                                                                                                                                                                                                                                                                                                                                                                                                                                                                                                                                                                                                                                                                                                                                                                                                                                                                                                                                                                                                                                                                                                                                                                                                                                                                                                                                                                                                                                                                                                                                                                                                                                                                                                                                                                                                                                                                                                                                                                                                                                                                                                                                                                                                                                                                                                                                                                                                                                                                                                                                                                                                                                                               |   |                    |                                                                         |     |                    |        |   |                    |              |   |                    |              |   |                    |                                           |   |                    |                                    |   |                    |                                     |   |                    |                 |   |                    |                 |    |                     |                     |    |                     |                                                |    |                     |                           |    |                     |                                         |    |                     |                              |    |                     |                                   |    |                     |                                     |    |                     |                   |    |                     |                               |    |                     |       |
| 40 | jb_acc_retour_precis<br>Afficher le champ UNIQUEM<br>ENT si :<br>[jb_acc_retour_equipe] = '1' | Please specify your answer                                                                                                | notes                                                                                                                                                                                                                                                                                                                                                                                                                                                                                                                                                                                                                                                                                                                                                                                                                                                                                                                                                                                                                                                                                                                                                                                                                                                                                                                                                                                                                                                                                                                                                                                                                                                                                                                                                                                                                                                                                                                                                                                                                                                                                                                                                                                                                                                                                                                                                                                                                                                                                                                                                                                                                                                                                                                                                                                                                                                                                                                                                                                                                                                                                                                                                                                                                                                                                                                                                                                                                                                                                                                                                                                         |   |                    |                                                                         |     |                    |        |   |                    |              |   |                    |              |   |                    |                                           |   |                    |                                    |   |                    |                                     |   |                    |                 |   |                    |                 |    |                     |                     |    |                     |                                                |    |                     |                           |    |                     |                                         |    |                     |                              |    |                     |                                   |    |                     |                                     |    |                     |                   |    |                     |                               |    |                     |       |

|   |            |                  |                                                          |                                                                                                                                                                                                                                                                                                                                                         |   |            |   |            |   |          |
|---|------------|------------------|----------------------------------------------------------|---------------------------------------------------------------------------------------------------------------------------------------------------------------------------------------------------------------------------------------------------------------------------------------------------------------------------------------------------------|---|------------|---|------------|---|----------|
|   | 41         | jb_acc_renc_prev | Are there any other meetings scheduled with the patient? | radio<br><table border="1"> <tr> <td data-bbox="1026 107 1054 147">0</td> <td data-bbox="1054 107 1099 147">No</td> </tr> <tr> <td data-bbox="1026 147 1054 188">1</td> <td data-bbox="1054 147 1099 188">Yes</td> </tr> </table>                                                                                                                       | 0 | No         | 1 | Yes        |   |          |
| 0 | No         |                  |                                                          |                                                                                                                                                                                                                                                                                                                                                         |   |            |   |            |   |          |
| 1 | Yes        |                  |                                                          |                                                                                                                                                                                                                                                                                                                                                         |   |            |   |            |   |          |
|   | 42         | jb_autres_info   | Other relevant information:                              | notes<br>Alignement personnalisé : LV                                                                                                                                                                                                                                                                                                                   |   |            |   |            |   |          |
|   | 43         | logbook_complete | En-tête de section : <i>Form Status</i><br>Complete?     | dropdown<br><table border="1"> <tr> <td data-bbox="1026 293 1054 333">0</td> <td data-bbox="1054 293 1169 333">Incomplete</td> </tr> <tr> <td data-bbox="1026 333 1054 374">1</td> <td data-bbox="1054 333 1169 374">Unverified</td> </tr> <tr> <td data-bbox="1026 374 1054 414">2</td> <td data-bbox="1054 374 1169 414">Complete</td> </tr> </table> | 0 | Incomplete | 1 | Unverified | 2 | Complete |
| 0 | Incomplete |                  |                                                          |                                                                                                                                                                                                                                                                                                                                                         |   |            |   |            |   |          |
| 1 | Unverified |                  |                                                          |                                                                                                                                                                                                                                                                                                                                                         |   |            |   |            |   |          |
| 2 | Complete   |                  |                                                          |                                                                                                                                                                                                                                                                                                                                                         |   |            |   |            |   |          |
