# Supplementary material
Source: PubMed Central journal article supplement (PMC7780394)
Supplement: 12913_2020_6009_MOESM7_ESM.pdf [file 12913_2020_6009_MOESM7_ESM.pdf]

## PAROLE-Onco-Professionnels-English

☰ Guide des codes ▾

### ☰ Code du dictionnaire de données

09-10-2020 21:17

^ Collapse all instruments

| # | Nom de variable/champ                                             | Étiquette de champ<br><i>Note de champ</i>  | Attributs de champ (type de champ, validation, choix, logique de branchement, calculs, etc.) |
|---|-------------------------------------------------------------------|---------------------------------------------|----------------------------------------------------------------------------------------------|
|   | Formulaire : <b>Participant identification form</b>               | (participant_identification_form)           | ▾ Expand                                                                                     |
|   | Formulaire : <b>PAROLE-Onco - Questionnaire T0- Clinical team</b> | (paroleonco_questionnaire_t0_clinical_team) | ^ Collapse                                                                                   |

|    |            |                                                                                                                                                                                                                                                                                                                                                                                                                                                                                                                                                                                                                                                                                                                                                                                                                                                                                                                                                                                                                                                                                                                                                                                                                                                                                                                                                                                                                                                                                                                                                                                                                                                                                                                                                                                                                                                                                                                                                                                                                                                                                                                                                                                                                                                                                                                                                                                                                                                                                                                                                                                                                                                                                                                                                                                                                                                                                                                                                                                                                                                                                                                                                                                                                                                                                                                                                                                                                                                                                                                               |                                          |
|----|------------|-------------------------------------------------------------------------------------------------------------------------------------------------------------------------------------------------------------------------------------------------------------------------------------------------------------------------------------------------------------------------------------------------------------------------------------------------------------------------------------------------------------------------------------------------------------------------------------------------------------------------------------------------------------------------------------------------------------------------------------------------------------------------------------------------------------------------------------------------------------------------------------------------------------------------------------------------------------------------------------------------------------------------------------------------------------------------------------------------------------------------------------------------------------------------------------------------------------------------------------------------------------------------------------------------------------------------------------------------------------------------------------------------------------------------------------------------------------------------------------------------------------------------------------------------------------------------------------------------------------------------------------------------------------------------------------------------------------------------------------------------------------------------------------------------------------------------------------------------------------------------------------------------------------------------------------------------------------------------------------------------------------------------------------------------------------------------------------------------------------------------------------------------------------------------------------------------------------------------------------------------------------------------------------------------------------------------------------------------------------------------------------------------------------------------------------------------------------------------------------------------------------------------------------------------------------------------------------------------------------------------------------------------------------------------------------------------------------------------------------------------------------------------------------------------------------------------------------------------------------------------------------------------------------------------------------------------------------------------------------------------------------------------------------------------------------------------------------------------------------------------------------------------------------------------------------------------------------------------------------------------------------------------------------------------------------------------------------------------------------------------------------------------------------------------------------------------------------------------------------------------------------------------------|------------------------------------------|
| 19 | pro_bidon1 | <p>En-tête de section : <i>INFORMATION AND CONSENT</i></p> <p>You are invited to participate in the PAROLE-Onco research project as a professional. However, before giving your consent to participate in this project, please take the time to carefully read, understand and consider the following information. In addition, we invite you to ask any questions you may have to the researcher in charge of the project or other members assigned to this research project and to ask them to explain any words or information that are not clear.</p> <p>The objective of this research project is to evaluate the impact of integrating patient advisors into cancer care teams. These patient advisors are patients who have already experienced episodes of cancer care and services and who use their experience with other patients who are experiencing a similar episode.</p> <p>Your participation in this project consists of completing a 15-minute online questionnaire about your perception of the introduction of patient advisors, collaborative practices and innovative culture.</p> <p>You will not derive any personal benefit from your participation in this research project. However, the results obtained will contribute to the advancement of practices and scientific knowledge in this field.</p> <p>All information collected will remain confidential within the limits of the law. This information includes your name, your contact information, the name of your institution and the title of your position. You will only be identified by a code number. The code key linking your name to your research file will be kept by the responsible researcher. Research data may be published or discussed scientifically without you being identified. The data collected will be kept for 10 years after the end of the study and then destroyed.</p> <p>Your participation in this research is voluntary. You are therefore free to refuse to participate. You can also stop answering the questionnaire at any time by closing your web browser window. Your answers will then be automatically deleted.</p> <p>If you have any questions or comments about this study, please do not hesitate to contact us by email at <a href="mailto:marie-pascale.pomey@umontreal.ca">marie-pascale.pomey@umontreal.ca</a>. If you have any questions about your rights as a participant in this research project, or if you have any complaints or comments, you can contact the CHUM's local service quality and complaints commissioner at 514 890-8484 or your institution's service quality and complaints commissioner, if different from the CHUM.</p> <p>The CHUM's research ethics committee has approved the project and will ensure that the project is monitored by the participating institutions in Quebec's health and social services network.</p> <p>I have read the above information and understand its content. As such, my participation in this questionnaire is voluntary and I consent to the use of my answers for the purposes of this research project. Completion of this questionnaire will be considered as my consent to participate in the study and to the use of the data collected in this questionnaire for the research purposes described in this form.</p> <p>Finally, please note that for those who complete the questionnaire online, it is possible to decrease or increase the font size by clicking on the + or - in the upper right-hand corner.</p> | checkbox<br>Alignement personnalisé : LV |
| 20 | pro_bidon6 | En-tête de section :                                                                                                                                                                                                                                                                                                                                                                                                                                                                                                                                                                                                                                                                                                                                                                                                                                                                                                                                                                                                                                                                                                                                                                                                                                                                                                                                                                                                                                                                                                                                                                                                                                                                                                                                                                                                                                                                                                                                                                                                                                                                                                                                                                                                                                                                                                                                                                                                                                                                                                                                                                                                                                                                                                                                                                                                                                                                                                                                                                                                                                                                                                                                                                                                                                                                                                                                                                                                                                                                                                          | descriptive                              |

|    |                            |                                                                                                                                                                                                                                                                                                        |                                                                                                                                                                                                                                                                                                                                                                              |   |                   |   |                 |   |                   |   |                            |   |                |   |              |   |                |
|----|----------------------------|--------------------------------------------------------------------------------------------------------------------------------------------------------------------------------------------------------------------------------------------------------------------------------------------------------|------------------------------------------------------------------------------------------------------------------------------------------------------------------------------------------------------------------------------------------------------------------------------------------------------------------------------------------------------------------------------|---|-------------------|---|-----------------|---|-------------------|---|----------------------------|---|----------------|---|--------------|---|----------------|
| 21 | pro_bidon3                 | The statements below address various themes related to collaborative practice. Please indicate your level of agreement with each statement based on your experience with the health care team you work with in oncology or oncogenetics. This is the team where patient advisors will be/are involved. | descriptive                                                                                                                                                                                                                                                                                                                                                                  |   |                   |   |                 |   |                   |   |                            |   |                |   |              |   |                |
| 22 | pro_respect                | En-tête de section : <i>COLLABORATIVE PRACTICES: GENERAL RELATIONSHIPS</i><br>Respect among team members improves with our ability to work together.                                                                                                                                                   | radio (Matrice)<br><table border="1"> <tr><td>0</td><td>Strongly disagree</td></tr> <tr><td>1</td><td>Mostly disagree</td></tr> <tr><td>2</td><td>Somewhat disagree</td></tr> <tr><td>3</td><td>Neither agree nor disagree</td></tr> <tr><td>4</td><td>Somewhat agree</td></tr> <tr><td>5</td><td>Mostly agree</td></tr> <tr><td>6</td><td>Strongly agree</td></tr> </table> | 0 | Strongly disagree | 1 | Mostly disagree | 2 | Somewhat disagree | 3 | Neither agree nor disagree | 4 | Somewhat agree | 5 | Mostly agree | 6 | Strongly agree |
| 0  | Strongly disagree          |                                                                                                                                                                                                                                                                                                        |                                                                                                                                                                                                                                                                                                                                                                              |   |                   |   |                 |   |                   |   |                            |   |                |   |              |   |                |
| 1  | Mostly disagree            |                                                                                                                                                                                                                                                                                                        |                                                                                                                                                                                                                                                                                                                                                                              |   |                   |   |                 |   |                   |   |                            |   |                |   |              |   |                |
| 2  | Somewhat disagree          |                                                                                                                                                                                                                                                                                                        |                                                                                                                                                                                                                                                                                                                                                                              |   |                   |   |                 |   |                   |   |                            |   |                |   |              |   |                |
| 3  | Neither agree nor disagree |                                                                                                                                                                                                                                                                                                        |                                                                                                                                                                                                                                                                                                                                                                              |   |                   |   |                 |   |                   |   |                            |   |                |   |              |   |                |
| 4  | Somewhat agree             |                                                                                                                                                                                                                                                                                                        |                                                                                                                                                                                                                                                                                                                                                                              |   |                   |   |                 |   |                   |   |                            |   |                |   |              |   |                |
| 5  | Mostly agree               |                                                                                                                                                                                                                                                                                                        |                                                                                                                                                                                                                                                                                                                                                                              |   |                   |   |                 |   |                   |   |                            |   |                |   |              |   |                |
| 6  | Strongly agree             |                                                                                                                                                                                                                                                                                                        |                                                                                                                                                                                                                                                                                                                                                                              |   |                   |   |                 |   |                   |   |                            |   |                |   |              |   |                |
| 23 | pro_bienetre               | Team members care about one another's personal well being.                                                                                                                                                                                                                                             | radio (Matrice)<br><table border="1"> <tr><td>0</td><td>Strongly disagree</td></tr> <tr><td>1</td><td>Mostly disagree</td></tr> <tr><td>2</td><td>Somewhat disagree</td></tr> <tr><td>3</td><td>Neither agree nor disagree</td></tr> <tr><td>4</td><td>Somewhat agree</td></tr> <tr><td>5</td><td>Mostly agree</td></tr> <tr><td>6</td><td>Strongly agree</td></tr> </table> | 0 | Strongly disagree | 1 | Mostly disagree | 2 | Somewhat disagree | 3 | Neither agree nor disagree | 4 | Somewhat agree | 5 | Mostly agree | 6 | Strongly agree |
| 0  | Strongly disagree          |                                                                                                                                                                                                                                                                                                        |                                                                                                                                                                                                                                                                                                                                                                              |   |                   |   |                 |   |                   |   |                            |   |                |   |              |   |                |
| 1  | Mostly disagree            |                                                                                                                                                                                                                                                                                                        |                                                                                                                                                                                                                                                                                                                                                                              |   |                   |   |                 |   |                   |   |                            |   |                |   |              |   |                |
| 2  | Somewhat disagree          |                                                                                                                                                                                                                                                                                                        |                                                                                                                                                                                                                                                                                                                                                                              |   |                   |   |                 |   |                   |   |                            |   |                |   |              |   |                |
| 3  | Neither agree nor disagree |                                                                                                                                                                                                                                                                                                        |                                                                                                                                                                                                                                                                                                                                                                              |   |                   |   |                 |   |                   |   |                            |   |                |   |              |   |                |
| 4  | Somewhat agree             |                                                                                                                                                                                                                                                                                                        |                                                                                                                                                                                                                                                                                                                                                                              |   |                   |   |                 |   |                   |   |                            |   |                |   |              |   |                |
| 5  | Mostly agree               |                                                                                                                                                                                                                                                                                                        |                                                                                                                                                                                                                                                                                                                                                                              |   |                   |   |                 |   |                   |   |                            |   |                |   |              |   |                |
| 6  | Strongly agree             |                                                                                                                                                                                                                                                                                                        |                                                                                                                                                                                                                                                                                                                                                                              |   |                   |   |                 |   |                   |   |                            |   |                |   |              |   |                |
| 24 | pro_actso                  | Socializing together enhances team work effectiveness.                                                                                                                                                                                                                                                 | radio (Matrice)<br><table border="1"> <tr><td>0</td><td>Strongly disagree</td></tr> <tr><td>1</td><td>Mostly disagree</td></tr> <tr><td>2</td><td>Somewhat disagree</td></tr> <tr><td>3</td><td>Neither agree nor disagree</td></tr> <tr><td>4</td><td>Somewhat agree</td></tr> <tr><td>5</td><td>Mostly agree</td></tr> <tr><td>6</td><td>Strongly agree</td></tr> </table> | 0 | Strongly disagree | 1 | Mostly disagree | 2 | Somewhat disagree | 3 | Neither agree nor disagree | 4 | Somewhat agree | 5 | Mostly agree | 6 | Strongly agree |
| 0  | Strongly disagree          |                                                                                                                                                                                                                                                                                                        |                                                                                                                                                                                                                                                                                                                                                                              |   |                   |   |                 |   |                   |   |                            |   |                |   |              |   |                |
| 1  | Mostly disagree            |                                                                                                                                                                                                                                                                                                        |                                                                                                                                                                                                                                                                                                                                                                              |   |                   |   |                 |   |                   |   |                            |   |                |   |              |   |                |
| 2  | Somewhat disagree          |                                                                                                                                                                                                                                                                                                        |                                                                                                                                                                                                                                                                                                                                                                              |   |                   |   |                 |   |                   |   |                            |   |                |   |              |   |                |
| 3  | Neither agree nor disagree |                                                                                                                                                                                                                                                                                                        |                                                                                                                                                                                                                                                                                                                                                                              |   |                   |   |                 |   |                   |   |                            |   |                |   |              |   |                |
| 4  | Somewhat agree             |                                                                                                                                                                                                                                                                                                        |                                                                                                                                                                                                                                                                                                                                                                              |   |                   |   |                 |   |                   |   |                            |   |                |   |              |   |                |
| 5  | Mostly agree               |                                                                                                                                                                                                                                                                                                        |                                                                                                                                                                                                                                                                                                                                                                              |   |                   |   |                 |   |                   |   |                            |   |                |   |              |   |                |
| 6  | Strongly agree             |                                                                                                                                                                                                                                                                                                        |                                                                                                                                                                                                                                                                                                                                                                              |   |                   |   |                 |   |                   |   |                            |   |                |   |              |   |                |
| 25 | pro_plaisant               | It is enjoyable to work with other team members.                                                                                                                                                                                                                                                       | radio (Matrice)<br><table border="1"> <tr><td>0</td><td>Strongly disagree</td></tr> <tr><td>1</td><td>Mostly disagree</td></tr> <tr><td>2</td><td>Somewhat disagree</td></tr> <tr><td>3</td><td>Neither agree nor disagree</td></tr> <tr><td>4</td><td>Somewhat agree</td></tr> <tr><td>5</td><td>Mostly agree</td></tr> <tr><td>6</td><td>Strongly agree</td></tr> </table> | 0 | Strongly disagree | 1 | Mostly disagree | 2 | Somewhat disagree | 3 | Neither agree nor disagree | 4 | Somewhat agree | 5 | Mostly agree | 6 | Strongly agree |
| 0  | Strongly disagree          |                                                                                                                                                                                                                                                                                                        |                                                                                                                                                                                                                                                                                                                                                                              |   |                   |   |                 |   |                   |   |                            |   |                |   |              |   |                |
| 1  | Mostly disagree            |                                                                                                                                                                                                                                                                                                        |                                                                                                                                                                                                                                                                                                                                                                              |   |                   |   |                 |   |                   |   |                            |   |                |   |              |   |                |
| 2  | Somewhat disagree          |                                                                                                                                                                                                                                                                                                        |                                                                                                                                                                                                                                                                                                                                                                              |   |                   |   |                 |   |                   |   |                            |   |                |   |              |   |                |
| 3  | Neither agree nor disagree |                                                                                                                                                                                                                                                                                                        |                                                                                                                                                                                                                                                                                                                                                                              |   |                   |   |                 |   |                   |   |                            |   |                |   |              |   |                |
| 4  | Somewhat agree             |                                                                                                                                                                                                                                                                                                        |                                                                                                                                                                                                                                                                                                                                                                              |   |                   |   |                 |   |                   |   |                            |   |                |   |              |   |                |
| 5  | Mostly agree               |                                                                                                                                                                                                                                                                                                        |                                                                                                                                                                                                                                                                                                                                                                              |   |                   |   |                 |   |                   |   |                            |   |                |   |              |   |                |
| 6  | Strongly agree             |                                                                                                                                                                                                                                                                                                        |                                                                                                                                                                                                                                                                                                                                                                              |   |                   |   |                 |   |                   |   |                            |   |                |   |              |   |                |
| 26 | pro_expertise              | Team members respect each other's roles and expertise.                                                                                                                                                                                                                                                 | radio (Matrice)<br><table border="1"> <tr><td>0</td><td>Strongly disagree</td></tr> <tr><td>1</td><td>Mostly disagree</td></tr> <tr><td>2</td><td>Somewhat disagree</td></tr> <tr><td>3</td><td>Neither agree nor disagree</td></tr> <tr><td>4</td><td>Somewhat agree</td></tr> <tr><td>5</td><td>Mostly agree</td></tr> <tr><td>6</td><td>Strongly agree</td></tr> </table> | 0 | Strongly disagree | 1 | Mostly disagree | 2 | Somewhat disagree | 3 | Neither agree nor disagree | 4 | Somewhat agree | 5 | Mostly agree | 6 | Strongly agree |
| 0  | Strongly disagree          |                                                                                                                                                                                                                                                                                                        |                                                                                                                                                                                                                                                                                                                                                                              |   |                   |   |                 |   |                   |   |                            |   |                |   |              |   |                |
| 1  | Mostly disagree            |                                                                                                                                                                                                                                                                                                        |                                                                                                                                                                                                                                                                                                                                                                              |   |                   |   |                 |   |                   |   |                            |   |                |   |              |   |                |
| 2  | Somewhat disagree          |                                                                                                                                                                                                                                                                                                        |                                                                                                                                                                                                                                                                                                                                                                              |   |                   |   |                 |   |                   |   |                            |   |                |   |              |   |                |
| 3  | Neither agree nor disagree |                                                                                                                                                                                                                                                                                                        |                                                                                                                                                                                                                                                                                                                                                                              |   |                   |   |                 |   |                   |   |                            |   |                |   |              |   |                |
| 4  | Somewhat agree             |                                                                                                                                                                                                                                                                                                        |                                                                                                                                                                                                                                                                                                                                                                              |   |                   |   |                 |   |                   |   |                            |   |                |   |              |   |                |
| 5  | Mostly agree               |                                                                                                                                                                                                                                                                                                        |                                                                                                                                                                                                                                                                                                                                                                              |   |                   |   |                 |   |                   |   |                            |   |                |   |              |   |                |
| 6  | Strongly agree             |                                                                                                                                                                                                                                                                                                        |                                                                                                                                                                                                                                                                                                                                                                              |   |                   |   |                 |   |                   |   |                            |   |                |   |              |   |                |
| 27 | pro_enthou                 | Working collaboratively keeps most team members enthusiastic and interested in their job.                                                                                                                                                                                                              | radio (Matrice)<br><table border="1"> <tr><td>0</td><td>Strongly disagree</td></tr> <tr><td>1</td><td>Mostly disagree</td></tr> <tr><td>2</td><td>Somewhat disagree</td></tr> <tr><td>3</td><td>Neither agree nor disagree</td></tr> <tr><td>4</td><td>Somewhat agree</td></tr> <tr><td>5</td><td>Mostly agree</td></tr> <tr><td>6</td><td>Strongly agree</td></tr> </table> | 0 | Strongly disagree | 1 | Mostly disagree | 2 | Somewhat disagree | 3 | Neither agree nor disagree | 4 | Somewhat agree | 5 | Mostly agree | 6 | Strongly agree |
| 0  | Strongly disagree          |                                                                                                                                                                                                                                                                                                        |                                                                                                                                                                                                                                                                                                                                                                              |   |                   |   |                 |   |                   |   |                            |   |                |   |              |   |                |
| 1  | Mostly disagree            |                                                                                                                                                                                                                                                                                                        |                                                                                                                                                                                                                                                                                                                                                                              |   |                   |   |                 |   |                   |   |                            |   |                |   |              |   |                |
| 2  | Somewhat disagree          |                                                                                                                                                                                                                                                                                                        |                                                                                                                                                                                                                                                                                                                                                                              |   |                   |   |                 |   |                   |   |                            |   |                |   |              |   |                |
| 3  | Neither agree nor disagree |                                                                                                                                                                                                                                                                                                        |                                                                                                                                                                                                                                                                                                                                                                              |   |                   |   |                 |   |                   |   |                            |   |                |   |              |   |                |
| 4  | Somewhat agree             |                                                                                                                                                                                                                                                                                                        |                                                                                                                                                                                                                                                                                                                                                                              |   |                   |   |                 |   |                   |   |                            |   |                |   |              |   |                |
| 5  | Mostly agree               |                                                                                                                                                                                                                                                                                                        |                                                                                                                                                                                                                                                                                                                                                                              |   |                   |   |                 |   |                   |   |                            |   |                |   |              |   |                |
| 6  | Strongly agree             |                                                                                                                                                                                                                                                                                                        |                                                                                                                                                                                                                                                                                                                                                                              |   |                   |   |                 |   |                   |   |                            |   |                |   |              |   |                |

|                 |                            |                                                                                                                                                                                                                         |                                                                                                                                                                                                                                                                                                                                                                                                         |                 |  |   |                   |   |                 |   |                   |   |                            |   |                |   |              |   |                |
|-----------------|----------------------------|-------------------------------------------------------------------------------------------------------------------------------------------------------------------------------------------------------------------------|---------------------------------------------------------------------------------------------------------------------------------------------------------------------------------------------------------------------------------------------------------------------------------------------------------------------------------------------------------------------------------------------------------|-----------------|--|---|-------------------|---|-----------------|---|-------------------|---|----------------------------|---|----------------|---|--------------|---|----------------|
| 28              | pro_confiance              | Team members trust each other's work and contributions related to patient care.                                                                                                                                         | <table border="1"> <tr><td colspan="2">radio (Matrice)</td></tr> <tr><td>0</td><td>Strongly disagree</td></tr> <tr><td>1</td><td>Mostly disagree</td></tr> <tr><td>2</td><td>Somewhat disagree</td></tr> <tr><td>3</td><td>Neither agree nor disagree</td></tr> <tr><td>4</td><td>Somewhat agree</td></tr> <tr><td>5</td><td>Mostly agree</td></tr> <tr><td>6</td><td>Strongly agree</td></tr> </table> | radio (Matrice) |  | 0 | Strongly disagree | 1 | Mostly disagree | 2 | Somewhat disagree | 3 | Neither agree nor disagree | 4 | Somewhat agree | 5 | Mostly agree | 6 | Strongly agree |
| radio (Matrice) |                            |                                                                                                                                                                                                                         |                                                                                                                                                                                                                                                                                                                                                                                                         |                 |  |   |                   |   |                 |   |                   |   |                            |   |                |   |              |   |                |
| 0               | Strongly disagree          |                                                                                                                                                                                                                         |                                                                                                                                                                                                                                                                                                                                                                                                         |                 |  |   |                   |   |                 |   |                   |   |                            |   |                |   |              |   |                |
| 1               | Mostly disagree            |                                                                                                                                                                                                                         |                                                                                                                                                                                                                                                                                                                                                                                                         |                 |  |   |                   |   |                 |   |                   |   |                            |   |                |   |              |   |                |
| 2               | Somewhat disagree          |                                                                                                                                                                                                                         |                                                                                                                                                                                                                                                                                                                                                                                                         |                 |  |   |                   |   |                 |   |                   |   |                            |   |                |   |              |   |                |
| 3               | Neither agree nor disagree |                                                                                                                                                                                                                         |                                                                                                                                                                                                                                                                                                                                                                                                         |                 |  |   |                   |   |                 |   |                   |   |                            |   |                |   |              |   |                |
| 4               | Somewhat agree             |                                                                                                                                                                                                                         |                                                                                                                                                                                                                                                                                                                                                                                                         |                 |  |   |                   |   |                 |   |                   |   |                            |   |                |   |              |   |                |
| 5               | Mostly agree               |                                                                                                                                                                                                                         |                                                                                                                                                                                                                                                                                                                                                                                                         |                 |  |   |                   |   |                 |   |                   |   |                            |   |                |   |              |   |                |
| 6               | Strongly agree             |                                                                                                                                                                                                                         |                                                                                                                                                                                                                                                                                                                                                                                                         |                 |  |   |                   |   |                 |   |                   |   |                            |   |                |   |              |   |                |
| 29              | pro_habil                  | Our team's level of respect for each other enhances our ability to work together.                                                                                                                                       | <table border="1"> <tr><td colspan="2">radio (Matrice)</td></tr> <tr><td>0</td><td>Strongly disagree</td></tr> <tr><td>1</td><td>Mostly disagree</td></tr> <tr><td>2</td><td>Somewhat disagree</td></tr> <tr><td>3</td><td>Neither agree nor disagree</td></tr> <tr><td>4</td><td>Somewhat agree</td></tr> <tr><td>5</td><td>Mostly agree</td></tr> <tr><td>6</td><td>Strongly agree</td></tr> </table> | radio (Matrice) |  | 0 | Strongly disagree | 1 | Mostly disagree | 2 | Somewhat disagree | 3 | Neither agree nor disagree | 4 | Somewhat agree | 5 | Mostly agree | 6 | Strongly agree |
| radio (Matrice) |                            |                                                                                                                                                                                                                         |                                                                                                                                                                                                                                                                                                                                                                                                         |                 |  |   |                   |   |                 |   |                   |   |                            |   |                |   |              |   |                |
| 0               | Strongly disagree          |                                                                                                                                                                                                                         |                                                                                                                                                                                                                                                                                                                                                                                                         |                 |  |   |                   |   |                 |   |                   |   |                            |   |                |   |              |   |                |
| 1               | Mostly disagree            |                                                                                                                                                                                                                         |                                                                                                                                                                                                                                                                                                                                                                                                         |                 |  |   |                   |   |                 |   |                   |   |                            |   |                |   |              |   |                |
| 2               | Somewhat disagree          |                                                                                                                                                                                                                         |                                                                                                                                                                                                                                                                                                                                                                                                         |                 |  |   |                   |   |                 |   |                   |   |                            |   |                |   |              |   |                |
| 3               | Neither agree nor disagree |                                                                                                                                                                                                                         |                                                                                                                                                                                                                                                                                                                                                                                                         |                 |  |   |                   |   |                 |   |                   |   |                            |   |                |   |              |   |                |
| 4               | Somewhat agree             |                                                                                                                                                                                                                         |                                                                                                                                                                                                                                                                                                                                                                                                         |                 |  |   |                   |   |                 |   |                   |   |                            |   |                |   |              |   |                |
| 5               | Mostly agree               |                                                                                                                                                                                                                         |                                                                                                                                                                                                                                                                                                                                                                                                         |                 |  |   |                   |   |                 |   |                   |   |                            |   |                |   |              |   |                |
| 6               | Strongly agree             |                                                                                                                                                                                                                         |                                                                                                                                                                                                                                                                                                                                                                                                         |                 |  |   |                   |   |                 |   |                   |   |                            |   |                |   |              |   |                |
| 30              | pro_harmonie               | <p>En-tête de section : <i>COLLABORATIVE PRACTICES: EVALUATION OF PRACTICES</i></p> <p>We regularly exchange on the harmonization of care practices during our team meetings and discussions.</p>                       | <table border="1"> <tr><td colspan="2">radio (Matrice)</td></tr> <tr><td>0</td><td>Strongly disagree</td></tr> <tr><td>1</td><td>Mostly disagree</td></tr> <tr><td>2</td><td>Somewhat disagree</td></tr> <tr><td>3</td><td>Neither agree nor disagree</td></tr> <tr><td>4</td><td>Somewhat agree</td></tr> <tr><td>5</td><td>Mostly agree</td></tr> <tr><td>6</td><td>Strongly agree</td></tr> </table> | radio (Matrice) |  | 0 | Strongly disagree | 1 | Mostly disagree | 2 | Somewhat disagree | 3 | Neither agree nor disagree | 4 | Somewhat agree | 5 | Mostly agree | 6 | Strongly agree |
| radio (Matrice) |                            |                                                                                                                                                                                                                         |                                                                                                                                                                                                                                                                                                                                                                                                         |                 |  |   |                   |   |                 |   |                   |   |                            |   |                |   |              |   |                |
| 0               | Strongly disagree          |                                                                                                                                                                                                                         |                                                                                                                                                                                                                                                                                                                                                                                                         |                 |  |   |                   |   |                 |   |                   |   |                            |   |                |   |              |   |                |
| 1               | Mostly disagree            |                                                                                                                                                                                                                         |                                                                                                                                                                                                                                                                                                                                                                                                         |                 |  |   |                   |   |                 |   |                   |   |                            |   |                |   |              |   |                |
| 2               | Somewhat disagree          |                                                                                                                                                                                                                         |                                                                                                                                                                                                                                                                                                                                                                                                         |                 |  |   |                   |   |                 |   |                   |   |                            |   |                |   |              |   |                |
| 3               | Neither agree nor disagree |                                                                                                                                                                                                                         |                                                                                                                                                                                                                                                                                                                                                                                                         |                 |  |   |                   |   |                 |   |                   |   |                            |   |                |   |              |   |                |
| 4               | Somewhat agree             |                                                                                                                                                                                                                         |                                                                                                                                                                                                                                                                                                                                                                                                         |                 |  |   |                   |   |                 |   |                   |   |                            |   |                |   |              |   |                |
| 5               | Mostly agree               |                                                                                                                                                                                                                         |                                                                                                                                                                                                                                                                                                                                                                                                         |                 |  |   |                   |   |                 |   |                   |   |                            |   |                |   |              |   |                |
| 6               | Strongly agree             |                                                                                                                                                                                                                         |                                                                                                                                                                                                                                                                                                                                                                                                         |                 |  |   |                   |   |                 |   |                   |   |                            |   |                |   |              |   |                |
| 31              | pro_pairs                  | Our team has a process for peer review.                                                                                                                                                                                 | <table border="1"> <tr><td colspan="2">radio (Matrice)</td></tr> <tr><td>0</td><td>Strongly disagree</td></tr> <tr><td>1</td><td>Mostly disagree</td></tr> <tr><td>2</td><td>Somewhat disagree</td></tr> <tr><td>3</td><td>Neither agree nor disagree</td></tr> <tr><td>4</td><td>Somewhat agree</td></tr> <tr><td>5</td><td>Mostly agree</td></tr> <tr><td>6</td><td>Strongly agree</td></tr> </table> | radio (Matrice) |  | 0 | Strongly disagree | 1 | Mostly disagree | 2 | Somewhat disagree | 3 | Neither agree nor disagree | 4 | Somewhat agree | 5 | Mostly agree | 6 | Strongly agree |
| radio (Matrice) |                            |                                                                                                                                                                                                                         |                                                                                                                                                                                                                                                                                                                                                                                                         |                 |  |   |                   |   |                 |   |                   |   |                            |   |                |   |              |   |                |
| 0               | Strongly disagree          |                                                                                                                                                                                                                         |                                                                                                                                                                                                                                                                                                                                                                                                         |                 |  |   |                   |   |                 |   |                   |   |                            |   |                |   |              |   |                |
| 1               | Mostly disagree            |                                                                                                                                                                                                                         |                                                                                                                                                                                                                                                                                                                                                                                                         |                 |  |   |                   |   |                 |   |                   |   |                            |   |                |   |              |   |                |
| 2               | Somewhat disagree          |                                                                                                                                                                                                                         |                                                                                                                                                                                                                                                                                                                                                                                                         |                 |  |   |                   |   |                 |   |                   |   |                            |   |                |   |              |   |                |
| 3               | Neither agree nor disagree |                                                                                                                                                                                                                         |                                                                                                                                                                                                                                                                                                                                                                                                         |                 |  |   |                   |   |                 |   |                   |   |                            |   |                |   |              |   |                |
| 4               | Somewhat agree             |                                                                                                                                                                                                                         |                                                                                                                                                                                                                                                                                                                                                                                                         |                 |  |   |                   |   |                 |   |                   |   |                            |   |                |   |              |   |                |
| 5               | Mostly agree               |                                                                                                                                                                                                                         |                                                                                                                                                                                                                                                                                                                                                                                                         |                 |  |   |                   |   |                 |   |                   |   |                            |   |                |   |              |   |                |
| 6               | Strongly agree             |                                                                                                                                                                                                                         |                                                                                                                                                                                                                                                                                                                                                                                                         |                 |  |   |                   |   |                 |   |                   |   |                            |   |                |   |              |   |                |
| 32              | pro_reconnais              | <p>En-tête de section : <i>COLLABORATIVE PRACTICES: GENERAL ROLE, RESPONSIBILITIES, AUTONOMY</i></p> <p>Team members acknowledge the aspects of care where members of my profession have more skills and expertise.</p> | <table border="1"> <tr><td colspan="2">radio (Matrice)</td></tr> <tr><td>0</td><td>Strongly disagree</td></tr> <tr><td>1</td><td>Mostly disagree</td></tr> <tr><td>2</td><td>Somewhat disagree</td></tr> <tr><td>3</td><td>Neither agree nor disagree</td></tr> <tr><td>4</td><td>Somewhat agree</td></tr> <tr><td>5</td><td>Mostly agree</td></tr> <tr><td>6</td><td>Strongly agree</td></tr> </table> | radio (Matrice) |  | 0 | Strongly disagree | 1 | Mostly disagree | 2 | Somewhat disagree | 3 | Neither agree nor disagree | 4 | Somewhat agree | 5 | Mostly agree | 6 | Strongly agree |
| radio (Matrice) |                            |                                                                                                                                                                                                                         |                                                                                                                                                                                                                                                                                                                                                                                                         |                 |  |   |                   |   |                 |   |                   |   |                            |   |                |   |              |   |                |
| 0               | Strongly disagree          |                                                                                                                                                                                                                         |                                                                                                                                                                                                                                                                                                                                                                                                         |                 |  |   |                   |   |                 |   |                   |   |                            |   |                |   |              |   |                |
| 1               | Mostly disagree            |                                                                                                                                                                                                                         |                                                                                                                                                                                                                                                                                                                                                                                                         |                 |  |   |                   |   |                 |   |                   |   |                            |   |                |   |              |   |                |
| 2               | Somewhat disagree          |                                                                                                                                                                                                                         |                                                                                                                                                                                                                                                                                                                                                                                                         |                 |  |   |                   |   |                 |   |                   |   |                            |   |                |   |              |   |                |
| 3               | Neither agree nor disagree |                                                                                                                                                                                                                         |                                                                                                                                                                                                                                                                                                                                                                                                         |                 |  |   |                   |   |                 |   |                   |   |                            |   |                |   |              |   |                |
| 4               | Somewhat agree             |                                                                                                                                                                                                                         |                                                                                                                                                                                                                                                                                                                                                                                                         |                 |  |   |                   |   |                 |   |                   |   |                            |   |                |   |              |   |                |
| 5               | Mostly agree               |                                                                                                                                                                                                                         |                                                                                                                                                                                                                                                                                                                                                                                                         |                 |  |   |                   |   |                 |   |                   |   |                            |   |                |   |              |   |                |
| 6               | Strongly agree             |                                                                                                                                                                                                                         |                                                                                                                                                                                                                                                                                                                                                                                                         |                 |  |   |                   |   |                 |   |                   |   |                            |   |                |   |              |   |                |
| 33              | pro_medresp                | Physicians assume the ultimate responsibility for team decisions and outcomes.                                                                                                                                          | <table border="1"> <tr><td colspan="2">radio (Matrice)</td></tr> <tr><td>0</td><td>Strongly disagree</td></tr> <tr><td>1</td><td>Mostly disagree</td></tr> <tr><td>2</td><td>Somewhat disagree</td></tr> <tr><td>3</td><td>Neither agree nor disagree</td></tr> <tr><td>4</td><td>Somewhat agree</td></tr> <tr><td>5</td><td>Mostly agree</td></tr> <tr><td>6</td><td>Strongly agree</td></tr> </table> | radio (Matrice) |  | 0 | Strongly disagree | 1 | Mostly disagree | 2 | Somewhat disagree | 3 | Neither agree nor disagree | 4 | Somewhat agree | 5 | Mostly agree | 6 | Strongly agree |
| radio (Matrice) |                            |                                                                                                                                                                                                                         |                                                                                                                                                                                                                                                                                                                                                                                                         |                 |  |   |                   |   |                 |   |                   |   |                            |   |                |   |              |   |                |
| 0               | Strongly disagree          |                                                                                                                                                                                                                         |                                                                                                                                                                                                                                                                                                                                                                                                         |                 |  |   |                   |   |                 |   |                   |   |                            |   |                |   |              |   |                |
| 1               | Mostly disagree            |                                                                                                                                                                                                                         |                                                                                                                                                                                                                                                                                                                                                                                                         |                 |  |   |                   |   |                 |   |                   |   |                            |   |                |   |              |   |                |
| 2               | Somewhat disagree          |                                                                                                                                                                                                                         |                                                                                                                                                                                                                                                                                                                                                                                                         |                 |  |   |                   |   |                 |   |                   |   |                            |   |                |   |              |   |                |
| 3               | Neither agree nor disagree |                                                                                                                                                                                                                         |                                                                                                                                                                                                                                                                                                                                                                                                         |                 |  |   |                   |   |                 |   |                   |   |                            |   |                |   |              |   |                |
| 4               | Somewhat agree             |                                                                                                                                                                                                                         |                                                                                                                                                                                                                                                                                                                                                                                                         |                 |  |   |                   |   |                 |   |                   |   |                            |   |                |   |              |   |                |
| 5               | Mostly agree               |                                                                                                                                                                                                                         |                                                                                                                                                                                                                                                                                                                                                                                                         |                 |  |   |                   |   |                 |   |                   |   |                            |   |                |   |              |   |                |
| 6               | Strongly agree             |                                                                                                                                                                                                                         |                                                                                                                                                                                                                                                                                                                                                                                                         |                 |  |   |                   |   |                 |   |                   |   |                            |   |                |   |              |   |                |

|    |                            |                                                                                                         |                                                                                                                                                                                                                                                                                                                                                                                                           |   |                   |   |                 |   |                   |   |                            |   |                |   |              |   |                |
|----|----------------------------|---------------------------------------------------------------------------------------------------------|-----------------------------------------------------------------------------------------------------------------------------------------------------------------------------------------------------------------------------------------------------------------------------------------------------------------------------------------------------------------------------------------------------------|---|-------------------|---|-----------------|---|-------------------|---|----------------------------|---|----------------|---|--------------|---|----------------|
| 34 | pro_nego                   | Team members negotiate the role they want to take in developing and implementing the patient care plan. | radio (Matrice) <table border="1" data-bbox="1027 114 1305 387"> <tr><td>0</td><td>Strongly disagree</td></tr> <tr><td>1</td><td>Mostly disagree</td></tr> <tr><td>2</td><td>Somewhat disagree</td></tr> <tr><td>3</td><td>Neither agree nor disagree</td></tr> <tr><td>4</td><td>Somewhat agree</td></tr> <tr><td>5</td><td>Mostly agree</td></tr> <tr><td>6</td><td>Strongly agree</td></tr> </table>   | 0 | Strongly disagree | 1 | Mostly disagree | 2 | Somewhat disagree | 3 | Neither agree nor disagree | 4 | Somewhat agree | 5 | Mostly agree | 6 | Strongly agree |
| 0  | Strongly disagree          |                                                                                                         |                                                                                                                                                                                                                                                                                                                                                                                                           |   |                   |   |                 |   |                   |   |                            |   |                |   |              |   |                |
| 1  | Mostly disagree            |                                                                                                         |                                                                                                                                                                                                                                                                                                                                                                                                           |   |                   |   |                 |   |                   |   |                            |   |                |   |              |   |                |
| 2  | Somewhat disagree          |                                                                                                         |                                                                                                                                                                                                                                                                                                                                                                                                           |   |                   |   |                 |   |                   |   |                            |   |                |   |              |   |                |
| 3  | Neither agree nor disagree |                                                                                                         |                                                                                                                                                                                                                                                                                                                                                                                                           |   |                   |   |                 |   |                   |   |                            |   |                |   |              |   |                |
| 4  | Somewhat agree             |                                                                                                         |                                                                                                                                                                                                                                                                                                                                                                                                           |   |                   |   |                 |   |                   |   |                            |   |                |   |              |   |                |
| 5  | Mostly agree               |                                                                                                         |                                                                                                                                                                                                                                                                                                                                                                                                           |   |                   |   |                 |   |                   |   |                            |   |                |   |              |   |                |
| 6  | Strongly agree             |                                                                                                         |                                                                                                                                                                                                                                                                                                                                                                                                           |   |                   |   |                 |   |                   |   |                            |   |                |   |              |   |                |
| 35 | pro_reprav                 | Team members are held accountable for their work.                                                       | radio (Matrice) <table border="1" data-bbox="1027 421 1305 694"> <tr><td>0</td><td>Strongly disagree</td></tr> <tr><td>1</td><td>Mostly disagree</td></tr> <tr><td>2</td><td>Somewhat disagree</td></tr> <tr><td>3</td><td>Neither agree nor disagree</td></tr> <tr><td>4</td><td>Somewhat agree</td></tr> <tr><td>5</td><td>Mostly agree</td></tr> <tr><td>6</td><td>Strongly agree</td></tr> </table>   | 0 | Strongly disagree | 1 | Mostly disagree | 2 | Somewhat disagree | 3 | Neither agree nor disagree | 4 | Somewhat agree | 5 | Mostly agree | 6 | Strongly agree |
| 0  | Strongly disagree          |                                                                                                         |                                                                                                                                                                                                                                                                                                                                                                                                           |   |                   |   |                 |   |                   |   |                            |   |                |   |              |   |                |
| 1  | Mostly disagree            |                                                                                                         |                                                                                                                                                                                                                                                                                                                                                                                                           |   |                   |   |                 |   |                   |   |                            |   |                |   |              |   |                |
| 2  | Somewhat disagree          |                                                                                                         |                                                                                                                                                                                                                                                                                                                                                                                                           |   |                   |   |                 |   |                   |   |                            |   |                |   |              |   |                |
| 3  | Neither agree nor disagree |                                                                                                         |                                                                                                                                                                                                                                                                                                                                                                                                           |   |                   |   |                 |   |                   |   |                            |   |                |   |              |   |                |
| 4  | Somewhat agree             |                                                                                                         |                                                                                                                                                                                                                                                                                                                                                                                                           |   |                   |   |                 |   |                   |   |                            |   |                |   |              |   |                |
| 5  | Mostly agree               |                                                                                                         |                                                                                                                                                                                                                                                                                                                                                                                                           |   |                   |   |                 |   |                   |   |                            |   |                |   |              |   |                |
| 6  | Strongly agree             |                                                                                                         |                                                                                                                                                                                                                                                                                                                                                                                                           |   |                   |   |                 |   |                   |   |                            |   |                |   |              |   |                |
| 36 | pro_implique               | It is clear who is responsible for aspects of the patient care plan.                                    | radio (Matrice) <table border="1" data-bbox="1027 736 1305 1010"> <tr><td>0</td><td>Strongly disagree</td></tr> <tr><td>1</td><td>Mostly disagree</td></tr> <tr><td>2</td><td>Somewhat disagree</td></tr> <tr><td>3</td><td>Neither agree nor disagree</td></tr> <tr><td>4</td><td>Somewhat agree</td></tr> <tr><td>5</td><td>Mostly agree</td></tr> <tr><td>6</td><td>Strongly agree</td></tr> </table>  | 0 | Strongly disagree | 1 | Mostly disagree | 2 | Somewhat disagree | 3 | Neither agree nor disagree | 4 | Somewhat agree | 5 | Mostly agree | 6 | Strongly agree |
| 0  | Strongly disagree          |                                                                                                         |                                                                                                                                                                                                                                                                                                                                                                                                           |   |                   |   |                 |   |                   |   |                            |   |                |   |              |   |                |
| 1  | Mostly disagree            |                                                                                                         |                                                                                                                                                                                                                                                                                                                                                                                                           |   |                   |   |                 |   |                   |   |                            |   |                |   |              |   |                |
| 2  | Somewhat disagree          |                                                                                                         |                                                                                                                                                                                                                                                                                                                                                                                                           |   |                   |   |                 |   |                   |   |                            |   |                |   |              |   |                |
| 3  | Neither agree nor disagree |                                                                                                         |                                                                                                                                                                                                                                                                                                                                                                                                           |   |                   |   |                 |   |                   |   |                            |   |                |   |              |   |                |
| 4  | Somewhat agree             |                                                                                                         |                                                                                                                                                                                                                                                                                                                                                                                                           |   |                   |   |                 |   |                   |   |                            |   |                |   |              |   |                |
| 5  | Mostly agree               |                                                                                                         |                                                                                                                                                                                                                                                                                                                                                                                                           |   |                   |   |                 |   |                   |   |                            |   |                |   |              |   |                |
| 6  | Strongly agree             |                                                                                                         |                                                                                                                                                                                                                                                                                                                                                                                                           |   |                   |   |                 |   |                   |   |                            |   |                |   |              |   |                |
| 37 | pro_opinion                | Physicians usually ask other team members for opinions about patient care.                              | radio (Matrice) <table border="1" data-bbox="1027 1052 1305 1326"> <tr><td>0</td><td>Strongly disagree</td></tr> <tr><td>1</td><td>Mostly disagree</td></tr> <tr><td>2</td><td>Somewhat disagree</td></tr> <tr><td>3</td><td>Neither agree nor disagree</td></tr> <tr><td>4</td><td>Somewhat agree</td></tr> <tr><td>5</td><td>Mostly agree</td></tr> <tr><td>6</td><td>Strongly agree</td></tr> </table> | 0 | Strongly disagree | 1 | Mostly disagree | 2 | Somewhat disagree | 3 | Neither agree nor disagree | 4 | Somewhat agree | 5 | Mostly agree | 6 | Strongly agree |
| 0  | Strongly disagree          |                                                                                                         |                                                                                                                                                                                                                                                                                                                                                                                                           |   |                   |   |                 |   |                   |   |                            |   |                |   |              |   |                |
| 1  | Mostly disagree            |                                                                                                         |                                                                                                                                                                                                                                                                                                                                                                                                           |   |                   |   |                 |   |                   |   |                            |   |                |   |              |   |                |
| 2  | Somewhat disagree          |                                                                                                         |                                                                                                                                                                                                                                                                                                                                                                                                           |   |                   |   |                 |   |                   |   |                            |   |                |   |              |   |                |
| 3  | Neither agree nor disagree |                                                                                                         |                                                                                                                                                                                                                                                                                                                                                                                                           |   |                   |   |                 |   |                   |   |                            |   |                |   |              |   |                |
| 4  | Somewhat agree             |                                                                                                         |                                                                                                                                                                                                                                                                                                                                                                                                           |   |                   |   |                 |   |                   |   |                            |   |                |   |              |   |                |
| 5  | Mostly agree               |                                                                                                         |                                                                                                                                                                                                                                                                                                                                                                                                           |   |                   |   |                 |   |                   |   |                            |   |                |   |              |   |                |
| 6  | Strongly agree             |                                                                                                         |                                                                                                                                                                                                                                                                                                                                                                                                           |   |                   |   |                 |   |                   |   |                            |   |                |   |              |   |                |
| 38 | pro_defint                 | Team members feel comfortable advocating for the patient.                                               | radio (Matrice) <table border="1" data-bbox="1027 1368 1305 1641"> <tr><td>0</td><td>Strongly disagree</td></tr> <tr><td>1</td><td>Mostly disagree</td></tr> <tr><td>2</td><td>Somewhat disagree</td></tr> <tr><td>3</td><td>Neither agree nor disagree</td></tr> <tr><td>4</td><td>Somewhat agree</td></tr> <tr><td>5</td><td>Mostly agree</td></tr> <tr><td>6</td><td>Strongly agree</td></tr> </table> | 0 | Strongly disagree | 1 | Mostly disagree | 2 | Somewhat disagree | 3 | Neither agree nor disagree | 4 | Somewhat agree | 5 | Mostly agree | 6 | Strongly agree |
| 0  | Strongly disagree          |                                                                                                         |                                                                                                                                                                                                                                                                                                                                                                                                           |   |                   |   |                 |   |                   |   |                            |   |                |   |              |   |                |
| 1  | Mostly disagree            |                                                                                                         |                                                                                                                                                                                                                                                                                                                                                                                                           |   |                   |   |                 |   |                   |   |                            |   |                |   |              |   |                |
| 2  | Somewhat disagree          |                                                                                                         |                                                                                                                                                                                                                                                                                                                                                                                                           |   |                   |   |                 |   |                   |   |                            |   |                |   |              |   |                |
| 3  | Neither agree nor disagree |                                                                                                         |                                                                                                                                                                                                                                                                                                                                                                                                           |   |                   |   |                 |   |                   |   |                            |   |                |   |              |   |                |
| 4  | Somewhat agree             |                                                                                                         |                                                                                                                                                                                                                                                                                                                                                                                                           |   |                   |   |                 |   |                   |   |                            |   |                |   |              |   |                |
| 5  | Mostly agree               |                                                                                                         |                                                                                                                                                                                                                                                                                                                                                                                                           |   |                   |   |                 |   |                   |   |                            |   |                |   |              |   |                |
| 6  | Strongly agree             |                                                                                                         |                                                                                                                                                                                                                                                                                                                                                                                                           |   |                   |   |                 |   |                   |   |                            |   |                |   |              |   |                |
| 39 | pro_respdec                | Each team member shares accountability for team decisions and outcomes.                                 | radio (Matrice) <table border="1" data-bbox="1027 1684 1305 1957"> <tr><td>0</td><td>Strongly disagree</td></tr> <tr><td>1</td><td>Mostly disagree</td></tr> <tr><td>2</td><td>Somewhat disagree</td></tr> <tr><td>3</td><td>Neither agree nor disagree</td></tr> <tr><td>4</td><td>Somewhat agree</td></tr> <tr><td>5</td><td>Mostly agree</td></tr> <tr><td>6</td><td>Strongly agree</td></tr> </table> | 0 | Strongly disagree | 1 | Mostly disagree | 2 | Somewhat disagree | 3 | Neither agree nor disagree | 4 | Somewhat agree | 5 | Mostly agree | 6 | Strongly agree |
| 0  | Strongly disagree          |                                                                                                         |                                                                                                                                                                                                                                                                                                                                                                                                           |   |                   |   |                 |   |                   |   |                            |   |                |   |              |   |                |
| 1  | Mostly disagree            |                                                                                                         |                                                                                                                                                                                                                                                                                                                                                                                                           |   |                   |   |                 |   |                   |   |                            |   |                |   |              |   |                |
| 2  | Somewhat disagree          |                                                                                                         |                                                                                                                                                                                                                                                                                                                                                                                                           |   |                   |   |                 |   |                   |   |                            |   |                |   |              |   |                |
| 3  | Neither agree nor disagree |                                                                                                         |                                                                                                                                                                                                                                                                                                                                                                                                           |   |                   |   |                 |   |                   |   |                            |   |                |   |              |   |                |
| 4  | Somewhat agree             |                                                                                                         |                                                                                                                                                                                                                                                                                                                                                                                                           |   |                   |   |                 |   |                   |   |                            |   |                |   |              |   |                |
| 5  | Mostly agree               |                                                                                                         |                                                                                                                                                                                                                                                                                                                                                                                                           |   |                   |   |                 |   |                   |   |                            |   |                |   |              |   |                |
| 6  | Strongly agree             |                                                                                                         |                                                                                                                                                                                                                                                                                                                                                                                                           |   |                   |   |                 |   |                   |   |                            |   |                |   |              |   |                |

|    |                            |                                                                                                                                        |                                                                                                                                                                                                                                                                                                                                                                                                           |   |                   |   |                 |   |                   |   |                            |   |                |   |              |   |                |
|----|----------------------------|----------------------------------------------------------------------------------------------------------------------------------------|-----------------------------------------------------------------------------------------------------------------------------------------------------------------------------------------------------------------------------------------------------------------------------------------------------------------------------------------------------------------------------------------------------------|---|-------------------|---|-----------------|---|-------------------|---|----------------------------|---|----------------|---|--------------|---|----------------|
| 40 | pro_comexpert              | Team members have the responsibility to communicate and provide their expertise in an assertive manner.                                | radio (Matrice) <table border="1" data-bbox="1026 107 1305 383"> <tr><td>0</td><td>Strongly disagree</td></tr> <tr><td>1</td><td>Mostly disagree</td></tr> <tr><td>2</td><td>Somewhat disagree</td></tr> <tr><td>3</td><td>Neither agree nor disagree</td></tr> <tr><td>4</td><td>Somewhat agree</td></tr> <tr><td>5</td><td>Mostly agree</td></tr> <tr><td>6</td><td>Strongly agree</td></tr> </table>   | 0 | Strongly disagree | 1 | Mostly disagree | 2 | Somewhat disagree | 3 | Neither agree nor disagree | 4 | Somewhat agree | 5 | Mostly agree | 6 | Strongly agree |
| 0  | Strongly disagree          |                                                                                                                                        |                                                                                                                                                                                                                                                                                                                                                                                                           |   |                   |   |                 |   |                   |   |                            |   |                |   |              |   |                |
| 1  | Mostly disagree            |                                                                                                                                        |                                                                                                                                                                                                                                                                                                                                                                                                           |   |                   |   |                 |   |                   |   |                            |   |                |   |              |   |                |
| 2  | Somewhat disagree          |                                                                                                                                        |                                                                                                                                                                                                                                                                                                                                                                                                           |   |                   |   |                 |   |                   |   |                            |   |                |   |              |   |                |
| 3  | Neither agree nor disagree |                                                                                                                                        |                                                                                                                                                                                                                                                                                                                                                                                                           |   |                   |   |                 |   |                   |   |                            |   |                |   |              |   |                |
| 4  | Somewhat agree             |                                                                                                                                        |                                                                                                                                                                                                                                                                                                                                                                                                           |   |                   |   |                 |   |                   |   |                            |   |                |   |              |   |                |
| 5  | Mostly agree               |                                                                                                                                        |                                                                                                                                                                                                                                                                                                                                                                                                           |   |                   |   |                 |   |                   |   |                            |   |                |   |              |   |                |
| 6  | Strongly agree             |                                                                                                                                        |                                                                                                                                                                                                                                                                                                                                                                                                           |   |                   |   |                 |   |                   |   |                            |   |                |   |              |   |                |
| 41 | pro_autono                 | Team members feel limited in the degree of autonomy in patient care that they can assume.                                              | radio (Matrice) <table border="1" data-bbox="1026 416 1305 692"> <tr><td>0</td><td>Strongly disagree</td></tr> <tr><td>1</td><td>Mostly disagree</td></tr> <tr><td>2</td><td>Somewhat disagree</td></tr> <tr><td>3</td><td>Neither agree nor disagree</td></tr> <tr><td>4</td><td>Somewhat agree</td></tr> <tr><td>5</td><td>Mostly agree</td></tr> <tr><td>6</td><td>Strongly agree</td></tr> </table>   | 0 | Strongly disagree | 1 | Mostly disagree | 2 | Somewhat disagree | 3 | Neither agree nor disagree | 4 | Somewhat agree | 5 | Mostly agree | 6 | Strongly agree |
| 0  | Strongly disagree          |                                                                                                                                        |                                                                                                                                                                                                                                                                                                                                                                                                           |   |                   |   |                 |   |                   |   |                            |   |                |   |              |   |                |
| 1  | Mostly disagree            |                                                                                                                                        |                                                                                                                                                                                                                                                                                                                                                                                                           |   |                   |   |                 |   |                   |   |                            |   |                |   |              |   |                |
| 2  | Somewhat disagree          |                                                                                                                                        |                                                                                                                                                                                                                                                                                                                                                                                                           |   |                   |   |                 |   |                   |   |                            |   |                |   |              |   |                |
| 3  | Neither agree nor disagree |                                                                                                                                        |                                                                                                                                                                                                                                                                                                                                                                                                           |   |                   |   |                 |   |                   |   |                            |   |                |   |              |   |                |
| 4  | Somewhat agree             |                                                                                                                                        |                                                                                                                                                                                                                                                                                                                                                                                                           |   |                   |   |                 |   |                   |   |                            |   |                |   |              |   |                |
| 5  | Mostly agree               |                                                                                                                                        |                                                                                                                                                                                                                                                                                                                                                                                                           |   |                   |   |                 |   |                   |   |                            |   |                |   |              |   |                |
| 6  | Strongly agree             |                                                                                                                                        |                                                                                                                                                                                                                                                                                                                                                                                                           |   |                   |   |                 |   |                   |   |                            |   |                |   |              |   |                |
| 42 | pro_preocc                 | Patients concerns are addressed effectively through regular team meetings and discussion                                               | radio (Matrice) <table border="1" data-bbox="1026 730 1305 1005"> <tr><td>0</td><td>Strongly disagree</td></tr> <tr><td>1</td><td>Mostly disagree</td></tr> <tr><td>2</td><td>Somewhat disagree</td></tr> <tr><td>3</td><td>Neither agree nor disagree</td></tr> <tr><td>4</td><td>Somewhat agree</td></tr> <tr><td>5</td><td>Mostly agree</td></tr> <tr><td>6</td><td>Strongly agree</td></tr> </table>  | 0 | Strongly disagree | 1 | Mostly disagree | 2 | Somewhat disagree | 3 | Neither agree nor disagree | 4 | Somewhat agree | 5 | Mostly agree | 6 | Strongly agree |
| 0  | Strongly disagree          |                                                                                                                                        |                                                                                                                                                                                                                                                                                                                                                                                                           |   |                   |   |                 |   |                   |   |                            |   |                |   |              |   |                |
| 1  | Mostly disagree            |                                                                                                                                        |                                                                                                                                                                                                                                                                                                                                                                                                           |   |                   |   |                 |   |                   |   |                            |   |                |   |              |   |                |
| 2  | Somewhat disagree          |                                                                                                                                        |                                                                                                                                                                                                                                                                                                                                                                                                           |   |                   |   |                 |   |                   |   |                            |   |                |   |              |   |                |
| 3  | Neither agree nor disagree |                                                                                                                                        |                                                                                                                                                                                                                                                                                                                                                                                                           |   |                   |   |                 |   |                   |   |                            |   |                |   |              |   |                |
| 4  | Somewhat agree             |                                                                                                                                        |                                                                                                                                                                                                                                                                                                                                                                                                           |   |                   |   |                 |   |                   |   |                            |   |                |   |              |   |                |
| 5  | Mostly agree               |                                                                                                                                        |                                                                                                                                                                                                                                                                                                                                                                                                           |   |                   |   |                 |   |                   |   |                            |   |                |   |              |   |                |
| 6  | Strongly agree             |                                                                                                                                        |                                                                                                                                                                                                                                                                                                                                                                                                           |   |                   |   |                 |   |                   |   |                            |   |                |   |              |   |                |
| 43 | pro_stratcom               | Our team has developed effective communication strategies to share patient treatment goals and outcomes of care.                       | radio (Matrice) <table border="1" data-bbox="1026 1043 1305 1319"> <tr><td>0</td><td>Strongly disagree</td></tr> <tr><td>1</td><td>Mostly disagree</td></tr> <tr><td>2</td><td>Somewhat disagree</td></tr> <tr><td>3</td><td>Neither agree nor disagree</td></tr> <tr><td>4</td><td>Somewhat agree</td></tr> <tr><td>5</td><td>Mostly agree</td></tr> <tr><td>6</td><td>Strongly agree</td></tr> </table> | 0 | Strongly disagree | 1 | Mostly disagree | 2 | Somewhat disagree | 3 | Neither agree nor disagree | 4 | Somewhat agree | 5 | Mostly agree | 6 | Strongly agree |
| 0  | Strongly disagree          |                                                                                                                                        |                                                                                                                                                                                                                                                                                                                                                                                                           |   |                   |   |                 |   |                   |   |                            |   |                |   |              |   |                |
| 1  | Mostly disagree            |                                                                                                                                        |                                                                                                                                                                                                                                                                                                                                                                                                           |   |                   |   |                 |   |                   |   |                            |   |                |   |              |   |                |
| 2  | Somewhat disagree          |                                                                                                                                        |                                                                                                                                                                                                                                                                                                                                                                                                           |   |                   |   |                 |   |                   |   |                            |   |                |   |              |   |                |
| 3  | Neither agree nor disagree |                                                                                                                                        |                                                                                                                                                                                                                                                                                                                                                                                                           |   |                   |   |                 |   |                   |   |                            |   |                |   |              |   |                |
| 4  | Somewhat agree             |                                                                                                                                        |                                                                                                                                                                                                                                                                                                                                                                                                           |   |                   |   |                 |   |                   |   |                            |   |                |   |              |   |                |
| 5  | Mostly agree               |                                                                                                                                        |                                                                                                                                                                                                                                                                                                                                                                                                           |   |                   |   |                 |   |                   |   |                            |   |                |   |              |   |                |
| 6  | Strongly agree             |                                                                                                                                        |                                                                                                                                                                                                                                                                                                                                                                                                           |   |                   |   |                 |   |                   |   |                            |   |                |   |              |   |                |
| 44 | pro_rapid                  | Relevant information relating to changes in patient status or care plan is reported to the appropriate team member in a timely manner. | radio (Matrice) <table border="1" data-bbox="1026 1357 1305 1632"> <tr><td>0</td><td>Strongly disagree</td></tr> <tr><td>1</td><td>Mostly disagree</td></tr> <tr><td>2</td><td>Somewhat disagree</td></tr> <tr><td>3</td><td>Neither agree nor disagree</td></tr> <tr><td>4</td><td>Somewhat agree</td></tr> <tr><td>5</td><td>Mostly agree</td></tr> <tr><td>6</td><td>Strongly agree</td></tr> </table> | 0 | Strongly disagree | 1 | Mostly disagree | 2 | Somewhat disagree | 3 | Neither agree nor disagree | 4 | Somewhat agree | 5 | Mostly agree | 6 | Strongly agree |
| 0  | Strongly disagree          |                                                                                                                                        |                                                                                                                                                                                                                                                                                                                                                                                                           |   |                   |   |                 |   |                   |   |                            |   |                |   |              |   |                |
| 1  | Mostly disagree            |                                                                                                                                        |                                                                                                                                                                                                                                                                                                                                                                                                           |   |                   |   |                 |   |                   |   |                            |   |                |   |              |   |                |
| 2  | Somewhat disagree          |                                                                                                                                        |                                                                                                                                                                                                                                                                                                                                                                                                           |   |                   |   |                 |   |                   |   |                            |   |                |   |              |   |                |
| 3  | Neither agree nor disagree |                                                                                                                                        |                                                                                                                                                                                                                                                                                                                                                                                                           |   |                   |   |                 |   |                   |   |                            |   |                |   |              |   |                |
| 4  | Somewhat agree             |                                                                                                                                        |                                                                                                                                                                                                                                                                                                                                                                                                           |   |                   |   |                 |   |                   |   |                            |   |                |   |              |   |                |
| 5  | Mostly agree               |                                                                                                                                        |                                                                                                                                                                                                                                                                                                                                                                                                           |   |                   |   |                 |   |                   |   |                            |   |                |   |              |   |                |
| 6  | Strongly agree             |                                                                                                                                        |                                                                                                                                                                                                                                                                                                                                                                                                           |   |                   |   |                 |   |                   |   |                            |   |                |   |              |   |                |
| 45 | pro_juste                  | I trust the accuracy of information reported among team members.                                                                       | radio (Matrice) <table border="1" data-bbox="1026 1671 1305 1946"> <tr><td>0</td><td>Strongly disagree</td></tr> <tr><td>1</td><td>Mostly disagree</td></tr> <tr><td>2</td><td>Somewhat disagree</td></tr> <tr><td>3</td><td>Neither agree nor disagree</td></tr> <tr><td>4</td><td>Somewhat agree</td></tr> <tr><td>5</td><td>Mostly agree</td></tr> <tr><td>6</td><td>Strongly agree</td></tr> </table> | 0 | Strongly disagree | 1 | Mostly disagree | 2 | Somewhat disagree | 3 | Neither agree nor disagree | 4 | Somewhat agree | 5 | Mostly agree | 6 | Strongly agree |
| 0  | Strongly disagree          |                                                                                                                                        |                                                                                                                                                                                                                                                                                                                                                                                                           |   |                   |   |                 |   |                   |   |                            |   |                |   |              |   |                |
| 1  | Mostly disagree            |                                                                                                                                        |                                                                                                                                                                                                                                                                                                                                                                                                           |   |                   |   |                 |   |                   |   |                            |   |                |   |              |   |                |
| 2  | Somewhat disagree          |                                                                                                                                        |                                                                                                                                                                                                                                                                                                                                                                                                           |   |                   |   |                 |   |                   |   |                            |   |                |   |              |   |                |
| 3  | Neither agree nor disagree |                                                                                                                                        |                                                                                                                                                                                                                                                                                                                                                                                                           |   |                   |   |                 |   |                   |   |                            |   |                |   |              |   |                |
| 4  | Somewhat agree             |                                                                                                                                        |                                                                                                                                                                                                                                                                                                                                                                                                           |   |                   |   |                 |   |                   |   |                            |   |                |   |              |   |                |
| 5  | Mostly agree               |                                                                                                                                        |                                                                                                                                                                                                                                                                                                                                                                                                           |   |                   |   |                 |   |                   |   |                            |   |                |   |              |   |                |
| 6  | Strongly agree             |                                                                                                                                        |                                                                                                                                                                                                                                                                                                                                                                                                           |   |                   |   |                 |   |                   |   |                            |   |                |   |              |   |                |

|    |                            |                                                                                                                                                          |                                                                                                                                                                                                                                                                                                                                                                                  |   |                   |   |                 |   |                   |   |                            |   |                |   |              |   |                |
|----|----------------------------|----------------------------------------------------------------------------------------------------------------------------------------------------------|----------------------------------------------------------------------------------------------------------------------------------------------------------------------------------------------------------------------------------------------------------------------------------------------------------------------------------------------------------------------------------|---|-------------------|---|-----------------|---|-------------------|---|----------------------------|---|----------------|---|--------------|---|----------------|
| 46 | pro_ouvert                 | Our team meetings provide an open, comfortable, safe place to discuss concerns.                                                                          | <p>radio (Matrice)</p> <table border="1"> <tr><td>0</td><td>Strongly disagree</td></tr> <tr><td>1</td><td>Mostly disagree</td></tr> <tr><td>2</td><td>Somewhat disagree</td></tr> <tr><td>3</td><td>Neither agree nor disagree</td></tr> <tr><td>4</td><td>Somewhat agree</td></tr> <tr><td>5</td><td>Mostly agree</td></tr> <tr><td>6</td><td>Strongly agree</td></tr> </table> | 0 | Strongly disagree | 1 | Mostly disagree | 2 | Somewhat disagree | 3 | Neither agree nor disagree | 4 | Somewhat agree | 5 | Mostly agree | 6 | Strongly agree |
| 0  | Strongly disagree          |                                                                                                                                                          |                                                                                                                                                                                                                                                                                                                                                                                  |   |                   |   |                 |   |                   |   |                            |   |                |   |              |   |                |
| 1  | Mostly disagree            |                                                                                                                                                          |                                                                                                                                                                                                                                                                                                                                                                                  |   |                   |   |                 |   |                   |   |                            |   |                |   |              |   |                |
| 2  | Somewhat disagree          |                                                                                                                                                          |                                                                                                                                                                                                                                                                                                                                                                                  |   |                   |   |                 |   |                   |   |                            |   |                |   |              |   |                |
| 3  | Neither agree nor disagree |                                                                                                                                                          |                                                                                                                                                                                                                                                                                                                                                                                  |   |                   |   |                 |   |                   |   |                            |   |                |   |              |   |                |
| 4  | Somewhat agree             |                                                                                                                                                          |                                                                                                                                                                                                                                                                                                                                                                                  |   |                   |   |                 |   |                   |   |                            |   |                |   |              |   |                |
| 5  | Mostly agree               |                                                                                                                                                          |                                                                                                                                                                                                                                                                                                                                                                                  |   |                   |   |                 |   |                   |   |                            |   |                |   |              |   |                |
| 6  | Strongly agree             |                                                                                                                                                          |                                                                                                                                                                                                                                                                                                                                                                                  |   |                   |   |                 |   |                   |   |                            |   |                |   |              |   |                |
| 47 | pro_dosmed                 | The patient health record is used effectively by all team members as a communication tool.                                                               | <p>radio (Matrice)</p> <table border="1"> <tr><td>0</td><td>Strongly disagree</td></tr> <tr><td>1</td><td>Mostly disagree</td></tr> <tr><td>2</td><td>Somewhat disagree</td></tr> <tr><td>3</td><td>Neither agree nor disagree</td></tr> <tr><td>4</td><td>Somewhat agree</td></tr> <tr><td>5</td><td>Mostly agree</td></tr> <tr><td>6</td><td>Strongly agree</td></tr> </table> | 0 | Strongly disagree | 1 | Mostly disagree | 2 | Somewhat disagree | 3 | Neither agree nor disagree | 4 | Somewhat agree | 5 | Mostly agree | 6 | Strongly agree |
| 0  | Strongly disagree          |                                                                                                                                                          |                                                                                                                                                                                                                                                                                                                                                                                  |   |                   |   |                 |   |                   |   |                            |   |                |   |              |   |                |
| 1  | Mostly disagree            |                                                                                                                                                          |                                                                                                                                                                                                                                                                                                                                                                                  |   |                   |   |                 |   |                   |   |                            |   |                |   |              |   |                |
| 2  | Somewhat disagree          |                                                                                                                                                          |                                                                                                                                                                                                                                                                                                                                                                                  |   |                   |   |                 |   |                   |   |                            |   |                |   |              |   |                |
| 3  | Neither agree nor disagree |                                                                                                                                                          |                                                                                                                                                                                                                                                                                                                                                                                  |   |                   |   |                 |   |                   |   |                            |   |                |   |              |   |                |
| 4  | Somewhat agree             |                                                                                                                                                          |                                                                                                                                                                                                                                                                                                                                                                                  |   |                   |   |                 |   |                   |   |                            |   |                |   |              |   |                |
| 5  | Mostly agree               |                                                                                                                                                          |                                                                                                                                                                                                                                                                                                                                                                                  |   |                   |   |                 |   |                   |   |                            |   |                |   |              |   |                |
| 6  | Strongly agree             |                                                                                                                                                          |                                                                                                                                                                                                                                                                                                                                                                                  |   |                   |   |                 |   |                   |   |                            |   |                |   |              |   |                |
| 48 | pro_liberagir              | <p>En-tête de section : <i>INNOVATIVE CULTURE</i></p> <p>In my workplace, people have a great deal of freedom to act and make the necessary changes.</p> | <p>radio (Matrice)</p> <table border="1"> <tr><td>0</td><td>Strongly disagree</td></tr> <tr><td>1</td><td>Mostly disagree</td></tr> <tr><td>2</td><td>Somewhat disagree</td></tr> <tr><td>3</td><td>Neither agree nor disagree</td></tr> <tr><td>4</td><td>Somewhat agree</td></tr> <tr><td>5</td><td>Mostly agree</td></tr> <tr><td>6</td><td>Strongly agree</td></tr> </table> | 0 | Strongly disagree | 1 | Mostly disagree | 2 | Somewhat disagree | 3 | Neither agree nor disagree | 4 | Somewhat agree | 5 | Mostly agree | 6 | Strongly agree |
| 0  | Strongly disagree          |                                                                                                                                                          |                                                                                                                                                                                                                                                                                                                                                                                  |   |                   |   |                 |   |                   |   |                            |   |                |   |              |   |                |
| 1  | Mostly disagree            |                                                                                                                                                          |                                                                                                                                                                                                                                                                                                                                                                                  |   |                   |   |                 |   |                   |   |                            |   |                |   |              |   |                |
| 2  | Somewhat disagree          |                                                                                                                                                          |                                                                                                                                                                                                                                                                                                                                                                                  |   |                   |   |                 |   |                   |   |                            |   |                |   |              |   |                |
| 3  | Neither agree nor disagree |                                                                                                                                                          |                                                                                                                                                                                                                                                                                                                                                                                  |   |                   |   |                 |   |                   |   |                            |   |                |   |              |   |                |
| 4  | Somewhat agree             |                                                                                                                                                          |                                                                                                                                                                                                                                                                                                                                                                                  |   |                   |   |                 |   |                   |   |                            |   |                |   |              |   |                |
| 5  | Mostly agree               |                                                                                                                                                          |                                                                                                                                                                                                                                                                                                                                                                                  |   |                   |   |                 |   |                   |   |                            |   |                |   |              |   |                |
| 6  | Strongly agree             |                                                                                                                                                          |                                                                                                                                                                                                                                                                                                                                                                                  |   |                   |   |                 |   |                   |   |                            |   |                |   |              |   |                |
| 49 | pro_encou                  | People on our team encourage each other to try new things.                                                                                               | <p>radio (Matrice)</p> <table border="1"> <tr><td>0</td><td>Strongly disagree</td></tr> <tr><td>1</td><td>Mostly disagree</td></tr> <tr><td>2</td><td>Somewhat disagree</td></tr> <tr><td>3</td><td>Neither agree nor disagree</td></tr> <tr><td>4</td><td>Somewhat agree</td></tr> <tr><td>5</td><td>Mostly agree</td></tr> <tr><td>6</td><td>Strongly agree</td></tr> </table> | 0 | Strongly disagree | 1 | Mostly disagree | 2 | Somewhat disagree | 3 | Neither agree nor disagree | 4 | Somewhat agree | 5 | Mostly agree | 6 | Strongly agree |
| 0  | Strongly disagree          |                                                                                                                                                          |                                                                                                                                                                                                                                                                                                                                                                                  |   |                   |   |                 |   |                   |   |                            |   |                |   |              |   |                |
| 1  | Mostly disagree            |                                                                                                                                                          |                                                                                                                                                                                                                                                                                                                                                                                  |   |                   |   |                 |   |                   |   |                            |   |                |   |              |   |                |
| 2  | Somewhat disagree          |                                                                                                                                                          |                                                                                                                                                                                                                                                                                                                                                                                  |   |                   |   |                 |   |                   |   |                            |   |                |   |              |   |                |
| 3  | Neither agree nor disagree |                                                                                                                                                          |                                                                                                                                                                                                                                                                                                                                                                                  |   |                   |   |                 |   |                   |   |                            |   |                |   |              |   |                |
| 4  | Somewhat agree             |                                                                                                                                                          |                                                                                                                                                                                                                                                                                                                                                                                  |   |                   |   |                 |   |                   |   |                            |   |                |   |              |   |                |
| 5  | Mostly agree               |                                                                                                                                                          |                                                                                                                                                                                                                                                                                                                                                                                  |   |                   |   |                 |   |                   |   |                            |   |                |   |              |   |                |
| 6  | Strongly agree             |                                                                                                                                                          |                                                                                                                                                                                                                                                                                                                                                                                  |   |                   |   |                 |   |                   |   |                            |   |                |   |              |   |                |
| 50 | pro_direncou               | Management encourages people to try new things.                                                                                                          | <p>radio (Matrice)</p> <table border="1"> <tr><td>0</td><td>Strongly disagree</td></tr> <tr><td>1</td><td>Mostly disagree</td></tr> <tr><td>2</td><td>Somewhat disagree</td></tr> <tr><td>3</td><td>Neither agree nor disagree</td></tr> <tr><td>4</td><td>Somewhat agree</td></tr> <tr><td>5</td><td>Mostly agree</td></tr> <tr><td>6</td><td>Strongly agree</td></tr> </table> | 0 | Strongly disagree | 1 | Mostly disagree | 2 | Somewhat disagree | 3 | Neither agree nor disagree | 4 | Somewhat agree | 5 | Mostly agree | 6 | Strongly agree |
| 0  | Strongly disagree          |                                                                                                                                                          |                                                                                                                                                                                                                                                                                                                                                                                  |   |                   |   |                 |   |                   |   |                            |   |                |   |              |   |                |
| 1  | Mostly disagree            |                                                                                                                                                          |                                                                                                                                                                                                                                                                                                                                                                                  |   |                   |   |                 |   |                   |   |                            |   |                |   |              |   |                |
| 2  | Somewhat disagree          |                                                                                                                                                          |                                                                                                                                                                                                                                                                                                                                                                                  |   |                   |   |                 |   |                   |   |                            |   |                |   |              |   |                |
| 3  | Neither agree nor disagree |                                                                                                                                                          |                                                                                                                                                                                                                                                                                                                                                                                  |   |                   |   |                 |   |                   |   |                            |   |                |   |              |   |                |
| 4  | Somewhat agree             |                                                                                                                                                          |                                                                                                                                                                                                                                                                                                                                                                                  |   |                   |   |                 |   |                   |   |                            |   |                |   |              |   |                |
| 5  | Mostly agree               |                                                                                                                                                          |                                                                                                                                                                                                                                                                                                                                                                                  |   |                   |   |                 |   |                   |   |                            |   |                |   |              |   |                |
| 6  | Strongly agree             |                                                                                                                                                          |                                                                                                                                                                                                                                                                                                                                                                                  |   |                   |   |                 |   |                   |   |                            |   |                |   |              |   |                |
| 51 | pro_flex                   | Our team is flexible and adapts quickly to new opportunities.                                                                                            | <p>radio (Matrice)</p> <table border="1"> <tr><td>0</td><td>Strongly disagree</td></tr> <tr><td>1</td><td>Mostly disagree</td></tr> <tr><td>2</td><td>Somewhat disagree</td></tr> <tr><td>3</td><td>Neither agree nor disagree</td></tr> <tr><td>4</td><td>Somewhat agree</td></tr> <tr><td>5</td><td>Mostly agree</td></tr> <tr><td>6</td><td>Strongly agree</td></tr> </table> | 0 | Strongly disagree | 1 | Mostly disagree | 2 | Somewhat disagree | 3 | Neither agree nor disagree | 4 | Somewhat agree | 5 | Mostly agree | 6 | Strongly agree |
| 0  | Strongly disagree          |                                                                                                                                                          |                                                                                                                                                                                                                                                                                                                                                                                  |   |                   |   |                 |   |                   |   |                            |   |                |   |              |   |                |
| 1  | Mostly disagree            |                                                                                                                                                          |                                                                                                                                                                                                                                                                                                                                                                                  |   |                   |   |                 |   |                   |   |                            |   |                |   |              |   |                |
| 2  | Somewhat disagree          |                                                                                                                                                          |                                                                                                                                                                                                                                                                                                                                                                                  |   |                   |   |                 |   |                   |   |                            |   |                |   |              |   |                |
| 3  | Neither agree nor disagree |                                                                                                                                                          |                                                                                                                                                                                                                                                                                                                                                                                  |   |                   |   |                 |   |                   |   |                            |   |                |   |              |   |                |
| 4  | Somewhat agree             |                                                                                                                                                          |                                                                                                                                                                                                                                                                                                                                                                                  |   |                   |   |                 |   |                   |   |                            |   |                |   |              |   |                |
| 5  | Mostly agree               |                                                                                                                                                          |                                                                                                                                                                                                                                                                                                                                                                                  |   |                   |   |                 |   |                   |   |                            |   |                |   |              |   |                |
| 6  | Strongly agree             |                                                                                                                                                          |                                                                                                                                                                                                                                                                                                                                                                                  |   |                   |   |                 |   |                   |   |                            |   |                |   |              |   |                |

|    |                                                                                                      |                                                                                                                                                                                                                                                                                                                                                                                             |                                                                                                                                                                                                                                                                                                                                                                                                                                                                                                                                                                                                                                                                                                                                                                                                                                                    |   |                            |              |                               |                 |                                      |   |                            |                                            |                |                 |                    |   |                 |                           |   |                 |                 |   |                 |               |   |                 |               |   |                 |                                |   |                 |       |
|----|------------------------------------------------------------------------------------------------------|---------------------------------------------------------------------------------------------------------------------------------------------------------------------------------------------------------------------------------------------------------------------------------------------------------------------------------------------------------------------------------------------|----------------------------------------------------------------------------------------------------------------------------------------------------------------------------------------------------------------------------------------------------------------------------------------------------------------------------------------------------------------------------------------------------------------------------------------------------------------------------------------------------------------------------------------------------------------------------------------------------------------------------------------------------------------------------------------------------------------------------------------------------------------------------------------------------------------------------------------------------|---|----------------------------|--------------|-------------------------------|-----------------|--------------------------------------|---|----------------------------|--------------------------------------------|----------------|-----------------|--------------------|---|-----------------|---------------------------|---|-----------------|-----------------|---|-----------------|---------------|---|-----------------|---------------|---|-----------------|--------------------------------|---|-----------------|-------|
| 52 | pro_decision                                                                                         | When a decision is made, it is implemented quickly.                                                                                                                                                                                                                                                                                                                                         | <p>radio (Matrice)</p> <table border="1"> <tr><td>0</td><td>Strongly disagree</td></tr> <tr><td>1</td><td>Mostly disagree</td></tr> <tr><td>2</td><td>Somewhat disagree</td></tr> <tr><td>3</td><td>Neither agree nor disagree</td></tr> <tr><td>4</td><td>Somewhat agree</td></tr> <tr><td>5</td><td>Mostly agree</td></tr> <tr><td>6</td><td>Strongly agree</td></tr> </table>                                                                                                                                                                                                                                                                                                                                                                                                                                                                   | 0 | Strongly disagree          | 1            | Mostly disagree               | 2               | Somewhat disagree                    | 3 | Neither agree nor disagree | 4                                          | Somewhat agree | 5               | Mostly agree       | 6 | Strongly agree  |                           |   |                 |                 |   |                 |               |   |                 |               |   |                 |                                |   |                 |       |
| 0  | Strongly disagree                                                                                    |                                                                                                                                                                                                                                                                                                                                                                                             |                                                                                                                                                                                                                                                                                                                                                                                                                                                                                                                                                                                                                                                                                                                                                                                                                                                    |   |                            |              |                               |                 |                                      |   |                            |                                            |                |                 |                    |   |                 |                           |   |                 |                 |   |                 |               |   |                 |               |   |                 |                                |   |                 |       |
| 1  | Mostly disagree                                                                                      |                                                                                                                                                                                                                                                                                                                                                                                             |                                                                                                                                                                                                                                                                                                                                                                                                                                                                                                                                                                                                                                                                                                                                                                                                                                                    |   |                            |              |                               |                 |                                      |   |                            |                                            |                |                 |                    |   |                 |                           |   |                 |                 |   |                 |               |   |                 |               |   |                 |                                |   |                 |       |
| 2  | Somewhat disagree                                                                                    |                                                                                                                                                                                                                                                                                                                                                                                             |                                                                                                                                                                                                                                                                                                                                                                                                                                                                                                                                                                                                                                                                                                                                                                                                                                                    |   |                            |              |                               |                 |                                      |   |                            |                                            |                |                 |                    |   |                 |                           |   |                 |                 |   |                 |               |   |                 |               |   |                 |                                |   |                 |       |
| 3  | Neither agree nor disagree                                                                           |                                                                                                                                                                                                                                                                                                                                                                                             |                                                                                                                                                                                                                                                                                                                                                                                                                                                                                                                                                                                                                                                                                                                                                                                                                                                    |   |                            |              |                               |                 |                                      |   |                            |                                            |                |                 |                    |   |                 |                           |   |                 |                 |   |                 |               |   |                 |               |   |                 |                                |   |                 |       |
| 4  | Somewhat agree                                                                                       |                                                                                                                                                                                                                                                                                                                                                                                             |                                                                                                                                                                                                                                                                                                                                                                                                                                                                                                                                                                                                                                                                                                                                                                                                                                                    |   |                            |              |                               |                 |                                      |   |                            |                                            |                |                 |                    |   |                 |                           |   |                 |                 |   |                 |               |   |                 |               |   |                 |                                |   |                 |       |
| 5  | Mostly agree                                                                                         |                                                                                                                                                                                                                                                                                                                                                                                             |                                                                                                                                                                                                                                                                                                                                                                                                                                                                                                                                                                                                                                                                                                                                                                                                                                                    |   |                            |              |                               |                 |                                      |   |                            |                                            |                |                 |                    |   |                 |                           |   |                 |                 |   |                 |               |   |                 |               |   |                 |                                |   |                 |       |
| 6  | Strongly agree                                                                                       |                                                                                                                                                                                                                                                                                                                                                                                             |                                                                                                                                                                                                                                                                                                                                                                                                                                                                                                                                                                                                                                                                                                                                                                                                                                                    |   |                            |              |                               |                 |                                      |   |                            |                                            |                |                 |                    |   |                 |                           |   |                 |                 |   |                 |               |   |                 |               |   |                 |                                |   |                 |       |
| 53 | pro_autonome                                                                                         | Our team is autonomous enough to implement new ideas without the authorization of supervisors.                                                                                                                                                                                                                                                                                              | <p>radio (Matrice)</p> <table border="1"> <tr><td>0</td><td>Strongly disagree</td></tr> <tr><td>1</td><td>Mostly disagree</td></tr> <tr><td>2</td><td>Somewhat disagree</td></tr> <tr><td>3</td><td>Neither agree nor disagree</td></tr> <tr><td>4</td><td>Somewhat agree</td></tr> <tr><td>5</td><td>Mostly agree</td></tr> <tr><td>6</td><td>Strongly agree</td></tr> </table>                                                                                                                                                                                                                                                                                                                                                                                                                                                                   | 0 | Strongly disagree          | 1            | Mostly disagree               | 2               | Somewhat disagree                    | 3 | Neither agree nor disagree | 4                                          | Somewhat agree | 5               | Mostly agree       | 6 | Strongly agree  |                           |   |                 |                 |   |                 |               |   |                 |               |   |                 |                                |   |                 |       |
| 0  | Strongly disagree                                                                                    |                                                                                                                                                                                                                                                                                                                                                                                             |                                                                                                                                                                                                                                                                                                                                                                                                                                                                                                                                                                                                                                                                                                                                                                                                                                                    |   |                            |              |                               |                 |                                      |   |                            |                                            |                |                 |                    |   |                 |                           |   |                 |                 |   |                 |               |   |                 |               |   |                 |                                |   |                 |       |
| 1  | Mostly disagree                                                                                      |                                                                                                                                                                                                                                                                                                                                                                                             |                                                                                                                                                                                                                                                                                                                                                                                                                                                                                                                                                                                                                                                                                                                                                                                                                                                    |   |                            |              |                               |                 |                                      |   |                            |                                            |                |                 |                    |   |                 |                           |   |                 |                 |   |                 |               |   |                 |               |   |                 |                                |   |                 |       |
| 2  | Somewhat disagree                                                                                    |                                                                                                                                                                                                                                                                                                                                                                                             |                                                                                                                                                                                                                                                                                                                                                                                                                                                                                                                                                                                                                                                                                                                                                                                                                                                    |   |                            |              |                               |                 |                                      |   |                            |                                            |                |                 |                    |   |                 |                           |   |                 |                 |   |                 |               |   |                 |               |   |                 |                                |   |                 |       |
| 3  | Neither agree nor disagree                                                                           |                                                                                                                                                                                                                                                                                                                                                                                             |                                                                                                                                                                                                                                                                                                                                                                                                                                                                                                                                                                                                                                                                                                                                                                                                                                                    |   |                            |              |                               |                 |                                      |   |                            |                                            |                |                 |                    |   |                 |                           |   |                 |                 |   |                 |               |   |                 |               |   |                 |                                |   |                 |       |
| 4  | Somewhat agree                                                                                       |                                                                                                                                                                                                                                                                                                                                                                                             |                                                                                                                                                                                                                                                                                                                                                                                                                                                                                                                                                                                                                                                                                                                                                                                                                                                    |   |                            |              |                               |                 |                                      |   |                            |                                            |                |                 |                    |   |                 |                           |   |                 |                 |   |                 |               |   |                 |               |   |                 |                                |   |                 |       |
| 5  | Mostly agree                                                                                         |                                                                                                                                                                                                                                                                                                                                                                                             |                                                                                                                                                                                                                                                                                                                                                                                                                                                                                                                                                                                                                                                                                                                                                                                                                                                    |   |                            |              |                               |                 |                                      |   |                            |                                            |                |                 |                    |   |                 |                           |   |                 |                 |   |                 |               |   |                 |               |   |                 |                                |   |                 |       |
| 6  | Strongly agree                                                                                       |                                                                                                                                                                                                                                                                                                                                                                                             |                                                                                                                                                                                                                                                                                                                                                                                                                                                                                                                                                                                                                                                                                                                                                                                                                                                    |   |                            |              |                               |                 |                                      |   |                            |                                            |                |                 |                    |   |                 |                           |   |                 |                 |   |                 |               |   |                 |               |   |                 |                                |   |                 |       |
| 54 | pro_organise                                                                                         | In this organization, we are always looking for new ways to organize our work to provide better care.                                                                                                                                                                                                                                                                                       | <p>radio (Matrice)</p> <table border="1"> <tr><td>0</td><td>Strongly disagree</td></tr> <tr><td>1</td><td>Mostly disagree</td></tr> <tr><td>2</td><td>Somewhat disagree</td></tr> <tr><td>3</td><td>Neither agree nor disagree</td></tr> <tr><td>4</td><td>Somewhat agree</td></tr> <tr><td>5</td><td>Mostly agree</td></tr> <tr><td>6</td><td>Strongly agree</td></tr> </table>                                                                                                                                                                                                                                                                                                                                                                                                                                                                   | 0 | Strongly disagree          | 1            | Mostly disagree               | 2               | Somewhat disagree                    | 3 | Neither agree nor disagree | 4                                          | Somewhat agree | 5               | Mostly agree       | 6 | Strongly agree  |                           |   |                 |                 |   |                 |               |   |                 |               |   |                 |                                |   |                 |       |
| 0  | Strongly disagree                                                                                    |                                                                                                                                                                                                                                                                                                                                                                                             |                                                                                                                                                                                                                                                                                                                                                                                                                                                                                                                                                                                                                                                                                                                                                                                                                                                    |   |                            |              |                               |                 |                                      |   |                            |                                            |                |                 |                    |   |                 |                           |   |                 |                 |   |                 |               |   |                 |               |   |                 |                                |   |                 |       |
| 1  | Mostly disagree                                                                                      |                                                                                                                                                                                                                                                                                                                                                                                             |                                                                                                                                                                                                                                                                                                                                                                                                                                                                                                                                                                                                                                                                                                                                                                                                                                                    |   |                            |              |                               |                 |                                      |   |                            |                                            |                |                 |                    |   |                 |                           |   |                 |                 |   |                 |               |   |                 |               |   |                 |                                |   |                 |       |
| 2  | Somewhat disagree                                                                                    |                                                                                                                                                                                                                                                                                                                                                                                             |                                                                                                                                                                                                                                                                                                                                                                                                                                                                                                                                                                                                                                                                                                                                                                                                                                                    |   |                            |              |                               |                 |                                      |   |                            |                                            |                |                 |                    |   |                 |                           |   |                 |                 |   |                 |               |   |                 |               |   |                 |                                |   |                 |       |
| 3  | Neither agree nor disagree                                                                           |                                                                                                                                                                                                                                                                                                                                                                                             |                                                                                                                                                                                                                                                                                                                                                                                                                                                                                                                                                                                                                                                                                                                                                                                                                                                    |   |                            |              |                               |                 |                                      |   |                            |                                            |                |                 |                    |   |                 |                           |   |                 |                 |   |                 |               |   |                 |               |   |                 |                                |   |                 |       |
| 4  | Somewhat agree                                                                                       |                                                                                                                                                                                                                                                                                                                                                                                             |                                                                                                                                                                                                                                                                                                                                                                                                                                                                                                                                                                                                                                                                                                                                                                                                                                                    |   |                            |              |                               |                 |                                      |   |                            |                                            |                |                 |                    |   |                 |                           |   |                 |                 |   |                 |               |   |                 |               |   |                 |                                |   |                 |       |
| 5  | Mostly agree                                                                                         |                                                                                                                                                                                                                                                                                                                                                                                             |                                                                                                                                                                                                                                                                                                                                                                                                                                                                                                                                                                                                                                                                                                                                                                                                                                                    |   |                            |              |                               |                 |                                      |   |                            |                                            |                |                 |                    |   |                 |                           |   |                 |                 |   |                 |               |   |                 |               |   |                 |                                |   |                 |       |
| 6  | Strongly agree                                                                                       |                                                                                                                                                                                                                                                                                                                                                                                             |                                                                                                                                                                                                                                                                                                                                                                                                                                                                                                                                                                                                                                                                                                                                                                                                                                                    |   |                            |              |                               |                 |                                      |   |                            |                                            |                |                 |                    |   |                 |                           |   |                 |                 |   |                 |               |   |                 |               |   |                 |                                |   |                 |       |
| 55 | pro_bidon4                                                                                           | <p>En-tête de section : <i>PERCEPTION OF INTEGRATION OF PATIENT ADVISORS (PAs)</i></p> <p>In your institution, patient advisors who have experienced significant events related to cancer or a genetic predisposition to cancer are willing to share their experience with other patients who are experiencing similar situations. In this context, we would like to know your opinion.</p> | descriptive                                                                                                                                                                                                                                                                                                                                                                                                                                                                                                                                                                                                                                                                                                                                                                                                                                        |   |                            |              |                               |                 |                                      |   |                            |                                            |                |                 |                    |   |                 |                           |   |                 |                 |   |                 |               |   |                 |               |   |                 |                                |   |                 |       |
| 56 | pro_fampa                                                                                            | Are you familiar with the concept of a patient advisor?                                                                                                                                                                                                                                                                                                                                     | <p>radio</p> <table border="1"> <tr><td>0</td><td>No, I've never heard of it</td></tr> <tr><td>1</td><td>I have heard vaguely about it</td></tr> <tr><td>2</td><td>Yes, I am familiar with this notion</td></tr> </table> <p>Alignement personnalisé : LV</p>                                                                                                                                                                                                                                                                                                                                                                                                                                                                                                                                                                                      | 0 | No, I've never heard of it | 1            | I have heard vaguely about it | 2               | Yes, I am familiar with this notion  |   |                            |                                            |                |                 |                    |   |                 |                           |   |                 |                 |   |                 |               |   |                 |               |   |                 |                                |   |                 |       |
| 0  | No, I've never heard of it                                                                           |                                                                                                                                                                                                                                                                                                                                                                                             |                                                                                                                                                                                                                                                                                                                                                                                                                                                                                                                                                                                                                                                                                                                                                                                                                                                    |   |                            |              |                               |                 |                                      |   |                            |                                            |                |                 |                    |   |                 |                           |   |                 |                 |   |                 |               |   |                 |               |   |                 |                                |   |                 |       |
| 1  | I have heard vaguely about it                                                                        |                                                                                                                                                                                                                                                                                                                                                                                             |                                                                                                                                                                                                                                                                                                                                                                                                                                                                                                                                                                                                                                                                                                                                                                                                                                                    |   |                            |              |                               |                 |                                      |   |                            |                                            |                |                 |                    |   |                 |                           |   |                 |                 |   |                 |               |   |                 |               |   |                 |                                |   |                 |       |
| 2  | Yes, I am familiar with this notion                                                                  |                                                                                                                                                                                                                                                                                                                                                                                             |                                                                                                                                                                                                                                                                                                                                                                                                                                                                                                                                                                                                                                                                                                                                                                                                                                                    |   |                            |              |                               |                 |                                      |   |                            |                                            |                |                 |                    |   |                 |                           |   |                 |                 |   |                 |               |   |                 |               |   |                 |                                |   |                 |       |
| 57 | <p>pro_parlerpa</p> <p>Afficher le champ UNIQUEM ENT si : [pro_fampa] = '2' or [pro_fampa] = '1'</p> | Where did you hear about it? Please select all that apply:                                                                                                                                                                                                                                                                                                                                  | <p>checkbox</p> <table border="1"> <tr><td>0</td><td>pro_parlerpa__0</td><td>Via internet</td></tr> <tr><td>1</td><td>pro_parlerpa__1</td><td>Via the website of the establishment</td></tr> <tr><td>2</td><td>pro_parlerpa__2</td><td>Via the written press of the establishment</td></tr> <tr><td>3</td><td>pro_parlerpa__3</td><td>Via the university</td></tr> <tr><td>4</td><td>pro_parlerpa__4</td><td>Via my head of department</td></tr> <tr><td>5</td><td>pro_parlerpa__5</td><td>Via a colleague</td></tr> <tr><td>6</td><td>pro_parlerpa__6</td><td>Via a patient</td></tr> <tr><td>7</td><td>pro_parlerpa__7</td><td>Via the media</td></tr> <tr><td>8</td><td>pro_parlerpa__8</td><td>Via a conference or literature</td></tr> <tr><td>9</td><td>pro_parlerpa__9</td><td>Other</td></tr> </table> <p>Alignement personnalisé : LV</p> | 0 | pro_parlerpa__0            | Via internet | 1                             | pro_parlerpa__1 | Via the website of the establishment | 2 | pro_parlerpa__2            | Via the written press of the establishment | 3              | pro_parlerpa__3 | Via the university | 4 | pro_parlerpa__4 | Via my head of department | 5 | pro_parlerpa__5 | Via a colleague | 6 | pro_parlerpa__6 | Via a patient | 7 | pro_parlerpa__7 | Via the media | 8 | pro_parlerpa__8 | Via a conference or literature | 9 | pro_parlerpa__9 | Other |
| 0  | pro_parlerpa__0                                                                                      | Via internet                                                                                                                                                                                                                                                                                                                                                                                |                                                                                                                                                                                                                                                                                                                                                                                                                                                                                                                                                                                                                                                                                                                                                                                                                                                    |   |                            |              |                               |                 |                                      |   |                            |                                            |                |                 |                    |   |                 |                           |   |                 |                 |   |                 |               |   |                 |               |   |                 |                                |   |                 |       |
| 1  | pro_parlerpa__1                                                                                      | Via the website of the establishment                                                                                                                                                                                                                                                                                                                                                        |                                                                                                                                                                                                                                                                                                                                                                                                                                                                                                                                                                                                                                                                                                                                                                                                                                                    |   |                            |              |                               |                 |                                      |   |                            |                                            |                |                 |                    |   |                 |                           |   |                 |                 |   |                 |               |   |                 |               |   |                 |                                |   |                 |       |
| 2  | pro_parlerpa__2                                                                                      | Via the written press of the establishment                                                                                                                                                                                                                                                                                                                                                  |                                                                                                                                                                                                                                                                                                                                                                                                                                                                                                                                                                                                                                                                                                                                                                                                                                                    |   |                            |              |                               |                 |                                      |   |                            |                                            |                |                 |                    |   |                 |                           |   |                 |                 |   |                 |               |   |                 |               |   |                 |                                |   |                 |       |
| 3  | pro_parlerpa__3                                                                                      | Via the university                                                                                                                                                                                                                                                                                                                                                                          |                                                                                                                                                                                                                                                                                                                                                                                                                                                                                                                                                                                                                                                                                                                                                                                                                                                    |   |                            |              |                               |                 |                                      |   |                            |                                            |                |                 |                    |   |                 |                           |   |                 |                 |   |                 |               |   |                 |               |   |                 |                                |   |                 |       |
| 4  | pro_parlerpa__4                                                                                      | Via my head of department                                                                                                                                                                                                                                                                                                                                                                   |                                                                                                                                                                                                                                                                                                                                                                                                                                                                                                                                                                                                                                                                                                                                                                                                                                                    |   |                            |              |                               |                 |                                      |   |                            |                                            |                |                 |                    |   |                 |                           |   |                 |                 |   |                 |               |   |                 |               |   |                 |                                |   |                 |       |
| 5  | pro_parlerpa__5                                                                                      | Via a colleague                                                                                                                                                                                                                                                                                                                                                                             |                                                                                                                                                                                                                                                                                                                                                                                                                                                                                                                                                                                                                                                                                                                                                                                                                                                    |   |                            |              |                               |                 |                                      |   |                            |                                            |                |                 |                    |   |                 |                           |   |                 |                 |   |                 |               |   |                 |               |   |                 |                                |   |                 |       |
| 6  | pro_parlerpa__6                                                                                      | Via a patient                                                                                                                                                                                                                                                                                                                                                                               |                                                                                                                                                                                                                                                                                                                                                                                                                                                                                                                                                                                                                                                                                                                                                                                                                                                    |   |                            |              |                               |                 |                                      |   |                            |                                            |                |                 |                    |   |                 |                           |   |                 |                 |   |                 |               |   |                 |               |   |                 |                                |   |                 |       |
| 7  | pro_parlerpa__7                                                                                      | Via the media                                                                                                                                                                                                                                                                                                                                                                               |                                                                                                                                                                                                                                                                                                                                                                                                                                                                                                                                                                                                                                                                                                                                                                                                                                                    |   |                            |              |                               |                 |                                      |   |                            |                                            |                |                 |                    |   |                 |                           |   |                 |                 |   |                 |               |   |                 |               |   |                 |                                |   |                 |       |
| 8  | pro_parlerpa__8                                                                                      | Via a conference or literature                                                                                                                                                                                                                                                                                                                                                              |                                                                                                                                                                                                                                                                                                                                                                                                                                                                                                                                                                                                                                                                                                                                                                                                                                                    |   |                            |              |                               |                 |                                      |   |                            |                                            |                |                 |                    |   |                 |                           |   |                 |                 |   |                 |               |   |                 |               |   |                 |                                |   |                 |       |
| 9  | pro_parlerpa__9                                                                                      | Other                                                                                                                                                                                                                                                                                                                                                                                       |                                                                                                                                                                                                                                                                                                                                                                                                                                                                                                                                                                                                                                                                                                                                                                                                                                                    |   |                            |              |                               |                 |                                      |   |                            |                                            |                |                 |                    |   |                 |                           |   |                 |                 |   |                 |               |   |                 |               |   |                 |                                |   |                 |       |
| 58 | <p>pro_parlerautre</p> <p>Afficher le champ UNIQUEM ENT si : [pro_parlerpa(9)] = '1'</p>             | If other, please specify:                                                                                                                                                                                                                                                                                                                                                                   | text                                                                                                                                                                                                                                                                                                                                                                                                                                                                                                                                                                                                                                                                                                                                                                                                                                               |   |                            |              |                               |                 |                                      |   |                            |                                            |                |                 |                    |   |                 |                           |   |                 |                 |   |                 |               |   |                 |               |   |                 |                                |   |                 |       |

|    |                                                                                      |                                                                                                                                                                                       |                                                                                                                                                                                                                                                                                                                                                                                                                                                                                                                                                                                                                                                                                                                                                                                                                                                                                                                                                                                                                                                                                                                                                                                                                                                                                                                                                                                                                                                    |   |                   |                      |          |                  |                            |   |                  |               |                |                  |                        |   |                  |                                      |   |                  |                                                                        |   |                  |                    |   |                  |                  |   |                  |                                  |    |                   |                                                               |    |                   |              |    |                   |                                               |    |                   |                                                               |    |                   |            |    |                   |       |
|----|--------------------------------------------------------------------------------------|---------------------------------------------------------------------------------------------------------------------------------------------------------------------------------------|----------------------------------------------------------------------------------------------------------------------------------------------------------------------------------------------------------------------------------------------------------------------------------------------------------------------------------------------------------------------------------------------------------------------------------------------------------------------------------------------------------------------------------------------------------------------------------------------------------------------------------------------------------------------------------------------------------------------------------------------------------------------------------------------------------------------------------------------------------------------------------------------------------------------------------------------------------------------------------------------------------------------------------------------------------------------------------------------------------------------------------------------------------------------------------------------------------------------------------------------------------------------------------------------------------------------------------------------------------------------------------------------------------------------------------------------------|---|-------------------|----------------------|----------|------------------|----------------------------|---|------------------|---------------|----------------|------------------|------------------------|---|------------------|--------------------------------------|---|------------------|------------------------------------------------------------------------|---|------------------|--------------------|---|------------------|------------------|---|------------------|----------------------------------|----|-------------------|---------------------------------------------------------------|----|-------------------|--------------|----|-------------------|-----------------------------------------------|----|-------------------|---------------------------------------------------------------|----|-------------------|------------|----|-------------------|-------|
| 59 | pro_utilpa                                                                           | Do you see the value of former patients (called patient advisors) being able to share their experience with others in similar situations?                                             | <p>radio</p> <table border="1"> <tr> <td>0</td> <td>No</td> </tr> <tr> <td>1</td> <td>Yes</td> </tr> </table> <p>Alignement personnalisé : LV</p>                                                                                                                                                                                                                                                                                                                                                                                                                                                                                                                                                                                                                                                                                                                                                                                                                                                                                                                                                                                                                                                                                                                                                                                                                                                                                                  | 0 | No                | 1                    | Yes      |                  |                            |   |                  |               |                |                  |                        |   |                  |                                      |   |                  |                                                                        |   |                  |                    |   |                  |                  |   |                  |                                  |    |                   |                                                               |    |                   |              |    |                   |                                               |    |                   |                                                               |    |                   |            |    |                   |       |
| 0  | No                                                                                   |                                                                                                                                                                                       |                                                                                                                                                                                                                                                                                                                                                                                                                                                                                                                                                                                                                                                                                                                                                                                                                                                                                                                                                                                                                                                                                                                                                                                                                                                                                                                                                                                                                                                    |   |                   |                      |          |                  |                            |   |                  |               |                |                  |                        |   |                  |                                      |   |                  |                                                                        |   |                  |                    |   |                  |                  |   |                  |                                  |    |                   |                                                               |    |                   |              |    |                   |                                               |    |                   |                                                               |    |                   |            |    |                   |       |
| 1  | Yes                                                                                  |                                                                                                                                                                                       |                                                                                                                                                                                                                                                                                                                                                                                                                                                                                                                                                                                                                                                                                                                                                                                                                                                                                                                                                                                                                                                                                                                                                                                                                                                                                                                                                                                                                                                    |   |                   |                      |          |                  |                            |   |                  |               |                |                  |                        |   |                  |                                      |   |                  |                                                                        |   |                  |                    |   |                  |                  |   |                  |                                  |    |                   |                                                               |    |                   |              |    |                   |                                               |    |                   |                                                               |    |                   |            |    |                   |       |
| 60 | pro_integre                                                                          | Do you think these patient advisors could be integrated into your team?                                                                                                               | <p>radio</p> <table border="1"> <tr> <td>0</td> <td>Yes</td> </tr> <tr> <td>1</td> <td>No</td> </tr> <tr> <td>2</td> <td>Maybe</td> </tr> </table> <p>Alignement personnalisé : LV</p>                                                                                                                                                                                                                                                                                                                                                                                                                                                                                                                                                                                                                                                                                                                                                                                                                                                                                                                                                                                                                                                                                                                                                                                                                                                             | 0 | Yes               | 1                    | No       | 2                | Maybe                      |   |                  |               |                |                  |                        |   |                  |                                      |   |                  |                                                                        |   |                  |                    |   |                  |                  |   |                  |                                  |    |                   |                                                               |    |                   |              |    |                   |                                               |    |                   |                                                               |    |                   |            |    |                   |       |
| 0  | Yes                                                                                  |                                                                                                                                                                                       |                                                                                                                                                                                                                                                                                                                                                                                                                                                                                                                                                                                                                                                                                                                                                                                                                                                                                                                                                                                                                                                                                                                                                                                                                                                                                                                                                                                                                                                    |   |                   |                      |          |                  |                            |   |                  |               |                |                  |                        |   |                  |                                      |   |                  |                                                                        |   |                  |                    |   |                  |                  |   |                  |                                  |    |                   |                                                               |    |                   |              |    |                   |                                               |    |                   |                                                               |    |                   |            |    |                   |       |
| 1  | No                                                                                   |                                                                                                                                                                                       |                                                                                                                                                                                                                                                                                                                                                                                                                                                                                                                                                                                                                                                                                                                                                                                                                                                                                                                                                                                                                                                                                                                                                                                                                                                                                                                                                                                                                                                    |   |                   |                      |          |                  |                            |   |                  |               |                |                  |                        |   |                  |                                      |   |                  |                                                                        |   |                  |                    |   |                  |                  |   |                  |                                  |    |                   |                                                               |    |                   |              |    |                   |                                               |    |                   |                                                               |    |                   |            |    |                   |       |
| 2  | Maybe                                                                                |                                                                                                                                                                                       |                                                                                                                                                                                                                                                                                                                                                                                                                                                                                                                                                                                                                                                                                                                                                                                                                                                                                                                                                                                                                                                                                                                                                                                                                                                                                                                                                                                                                                                    |   |                   |                      |          |                  |                            |   |                  |               |                |                  |                        |   |                  |                                      |   |                  |                                                                        |   |                  |                    |   |                  |                  |   |                  |                                  |    |                   |                                                               |    |                   |              |    |                   |                                               |    |                   |                                                               |    |                   |            |    |                   |       |
| 61 | pro_obstacles                                                                        | What might be the barrier(s) to integrating these patient advisors (PAs) into your clinic? Please select all that apply:                                                              | <p>checkbox</p> <table border="1"> <tr> <td>1</td> <td>pro_obstacles__1</td> <td>Resistance to change</td> </tr> <tr> <td>2</td> <td>pro_obstacles__2</td> <td>Lack of time</td> </tr> <tr> <td>3</td> <td>pro_obstacles__3</td> <td>Work overload</td> </tr> <tr> <td>4</td> <td>pro_obstacles__4</td> <td>Lack of physical space</td> </tr> <tr> <td>5</td> <td>pro_obstacles__5</td> <td>Fear of inadequate PA's intervention</td> </tr> <tr> <td>6</td> <td>pro_obstacles__6</td> <td>Fear that PAs address emotional issues that may be difficult to manage</td> </tr> <tr> <td>7</td> <td>pro_obstacles__7</td> <td>Confusion of roles</td> </tr> <tr> <td>8</td> <td>pro_obstacles__8</td> <td>Patient distrust</td> </tr> <tr> <td>9</td> <td>pro_obstacles__9</td> <td>Patients' sense of intrusiveness</td> </tr> <tr> <td>10</td> <td>pro_obstacles__10</td> <td>Confronting different perceptions of the PA and the physician</td> </tr> <tr> <td>11</td> <td>pro_obstacles__11</td> <td>No relevance</td> </tr> <tr> <td>12</td> <td>pro_obstacles__12</td> <td>No value added to already available resources</td> </tr> <tr> <td>13</td> <td>pro_obstacles__13</td> <td>There are no barriers to the integration of patient advisors.</td> </tr> <tr> <td>14</td> <td>pro_obstacles__14</td> <td>Don't know</td> </tr> <tr> <td>15</td> <td>pro_obstacles__15</td> <td>Other</td> </tr> </table> <p>Alignement personnalisé : LV</p> | 1 | pro_obstacles__1  | Resistance to change | 2        | pro_obstacles__2 | Lack of time               | 3 | pro_obstacles__3 | Work overload | 4              | pro_obstacles__4 | Lack of physical space | 5 | pro_obstacles__5 | Fear of inadequate PA's intervention | 6 | pro_obstacles__6 | Fear that PAs address emotional issues that may be difficult to manage | 7 | pro_obstacles__7 | Confusion of roles | 8 | pro_obstacles__8 | Patient distrust | 9 | pro_obstacles__9 | Patients' sense of intrusiveness | 10 | pro_obstacles__10 | Confronting different perceptions of the PA and the physician | 11 | pro_obstacles__11 | No relevance | 12 | pro_obstacles__12 | No value added to already available resources | 13 | pro_obstacles__13 | There are no barriers to the integration of patient advisors. | 14 | pro_obstacles__14 | Don't know | 15 | pro_obstacles__15 | Other |
| 1  | pro_obstacles__1                                                                     | Resistance to change                                                                                                                                                                  |                                                                                                                                                                                                                                                                                                                                                                                                                                                                                                                                                                                                                                                                                                                                                                                                                                                                                                                                                                                                                                                                                                                                                                                                                                                                                                                                                                                                                                                    |   |                   |                      |          |                  |                            |   |                  |               |                |                  |                        |   |                  |                                      |   |                  |                                                                        |   |                  |                    |   |                  |                  |   |                  |                                  |    |                   |                                                               |    |                   |              |    |                   |                                               |    |                   |                                                               |    |                   |            |    |                   |       |
| 2  | pro_obstacles__2                                                                     | Lack of time                                                                                                                                                                          |                                                                                                                                                                                                                                                                                                                                                                                                                                                                                                                                                                                                                                                                                                                                                                                                                                                                                                                                                                                                                                                                                                                                                                                                                                                                                                                                                                                                                                                    |   |                   |                      |          |                  |                            |   |                  |               |                |                  |                        |   |                  |                                      |   |                  |                                                                        |   |                  |                    |   |                  |                  |   |                  |                                  |    |                   |                                                               |    |                   |              |    |                   |                                               |    |                   |                                                               |    |                   |            |    |                   |       |
| 3  | pro_obstacles__3                                                                     | Work overload                                                                                                                                                                         |                                                                                                                                                                                                                                                                                                                                                                                                                                                                                                                                                                                                                                                                                                                                                                                                                                                                                                                                                                                                                                                                                                                                                                                                                                                                                                                                                                                                                                                    |   |                   |                      |          |                  |                            |   |                  |               |                |                  |                        |   |                  |                                      |   |                  |                                                                        |   |                  |                    |   |                  |                  |   |                  |                                  |    |                   |                                                               |    |                   |              |    |                   |                                               |    |                   |                                                               |    |                   |            |    |                   |       |
| 4  | pro_obstacles__4                                                                     | Lack of physical space                                                                                                                                                                |                                                                                                                                                                                                                                                                                                                                                                                                                                                                                                                                                                                                                                                                                                                                                                                                                                                                                                                                                                                                                                                                                                                                                                                                                                                                                                                                                                                                                                                    |   |                   |                      |          |                  |                            |   |                  |               |                |                  |                        |   |                  |                                      |   |                  |                                                                        |   |                  |                    |   |                  |                  |   |                  |                                  |    |                   |                                                               |    |                   |              |    |                   |                                               |    |                   |                                                               |    |                   |            |    |                   |       |
| 5  | pro_obstacles__5                                                                     | Fear of inadequate PA's intervention                                                                                                                                                  |                                                                                                                                                                                                                                                                                                                                                                                                                                                                                                                                                                                                                                                                                                                                                                                                                                                                                                                                                                                                                                                                                                                                                                                                                                                                                                                                                                                                                                                    |   |                   |                      |          |                  |                            |   |                  |               |                |                  |                        |   |                  |                                      |   |                  |                                                                        |   |                  |                    |   |                  |                  |   |                  |                                  |    |                   |                                                               |    |                   |              |    |                   |                                               |    |                   |                                                               |    |                   |            |    |                   |       |
| 6  | pro_obstacles__6                                                                     | Fear that PAs address emotional issues that may be difficult to manage                                                                                                                |                                                                                                                                                                                                                                                                                                                                                                                                                                                                                                                                                                                                                                                                                                                                                                                                                                                                                                                                                                                                                                                                                                                                                                                                                                                                                                                                                                                                                                                    |   |                   |                      |          |                  |                            |   |                  |               |                |                  |                        |   |                  |                                      |   |                  |                                                                        |   |                  |                    |   |                  |                  |   |                  |                                  |    |                   |                                                               |    |                   |              |    |                   |                                               |    |                   |                                                               |    |                   |            |    |                   |       |
| 7  | pro_obstacles__7                                                                     | Confusion of roles                                                                                                                                                                    |                                                                                                                                                                                                                                                                                                                                                                                                                                                                                                                                                                                                                                                                                                                                                                                                                                                                                                                                                                                                                                                                                                                                                                                                                                                                                                                                                                                                                                                    |   |                   |                      |          |                  |                            |   |                  |               |                |                  |                        |   |                  |                                      |   |                  |                                                                        |   |                  |                    |   |                  |                  |   |                  |                                  |    |                   |                                                               |    |                   |              |    |                   |                                               |    |                   |                                                               |    |                   |            |    |                   |       |
| 8  | pro_obstacles__8                                                                     | Patient distrust                                                                                                                                                                      |                                                                                                                                                                                                                                                                                                                                                                                                                                                                                                                                                                                                                                                                                                                                                                                                                                                                                                                                                                                                                                                                                                                                                                                                                                                                                                                                                                                                                                                    |   |                   |                      |          |                  |                            |   |                  |               |                |                  |                        |   |                  |                                      |   |                  |                                                                        |   |                  |                    |   |                  |                  |   |                  |                                  |    |                   |                                                               |    |                   |              |    |                   |                                               |    |                   |                                                               |    |                   |            |    |                   |       |
| 9  | pro_obstacles__9                                                                     | Patients' sense of intrusiveness                                                                                                                                                      |                                                                                                                                                                                                                                                                                                                                                                                                                                                                                                                                                                                                                                                                                                                                                                                                                                                                                                                                                                                                                                                                                                                                                                                                                                                                                                                                                                                                                                                    |   |                   |                      |          |                  |                            |   |                  |               |                |                  |                        |   |                  |                                      |   |                  |                                                                        |   |                  |                    |   |                  |                  |   |                  |                                  |    |                   |                                                               |    |                   |              |    |                   |                                               |    |                   |                                                               |    |                   |            |    |                   |       |
| 10 | pro_obstacles__10                                                                    | Confronting different perceptions of the PA and the physician                                                                                                                         |                                                                                                                                                                                                                                                                                                                                                                                                                                                                                                                                                                                                                                                                                                                                                                                                                                                                                                                                                                                                                                                                                                                                                                                                                                                                                                                                                                                                                                                    |   |                   |                      |          |                  |                            |   |                  |               |                |                  |                        |   |                  |                                      |   |                  |                                                                        |   |                  |                    |   |                  |                  |   |                  |                                  |    |                   |                                                               |    |                   |              |    |                   |                                               |    |                   |                                                               |    |                   |            |    |                   |       |
| 11 | pro_obstacles__11                                                                    | No relevance                                                                                                                                                                          |                                                                                                                                                                                                                                                                                                                                                                                                                                                                                                                                                                                                                                                                                                                                                                                                                                                                                                                                                                                                                                                                                                                                                                                                                                                                                                                                                                                                                                                    |   |                   |                      |          |                  |                            |   |                  |               |                |                  |                        |   |                  |                                      |   |                  |                                                                        |   |                  |                    |   |                  |                  |   |                  |                                  |    |                   |                                                               |    |                   |              |    |                   |                                               |    |                   |                                                               |    |                   |            |    |                   |       |
| 12 | pro_obstacles__12                                                                    | No value added to already available resources                                                                                                                                         |                                                                                                                                                                                                                                                                                                                                                                                                                                                                                                                                                                                                                                                                                                                                                                                                                                                                                                                                                                                                                                                                                                                                                                                                                                                                                                                                                                                                                                                    |   |                   |                      |          |                  |                            |   |                  |               |                |                  |                        |   |                  |                                      |   |                  |                                                                        |   |                  |                    |   |                  |                  |   |                  |                                  |    |                   |                                                               |    |                   |              |    |                   |                                               |    |                   |                                                               |    |                   |            |    |                   |       |
| 13 | pro_obstacles__13                                                                    | There are no barriers to the integration of patient advisors.                                                                                                                         |                                                                                                                                                                                                                                                                                                                                                                                                                                                                                                                                                                                                                                                                                                                                                                                                                                                                                                                                                                                                                                                                                                                                                                                                                                                                                                                                                                                                                                                    |   |                   |                      |          |                  |                            |   |                  |               |                |                  |                        |   |                  |                                      |   |                  |                                                                        |   |                  |                    |   |                  |                  |   |                  |                                  |    |                   |                                                               |    |                   |              |    |                   |                                               |    |                   |                                                               |    |                   |            |    |                   |       |
| 14 | pro_obstacles__14                                                                    | Don't know                                                                                                                                                                            |                                                                                                                                                                                                                                                                                                                                                                                                                                                                                                                                                                                                                                                                                                                                                                                                                                                                                                                                                                                                                                                                                                                                                                                                                                                                                                                                                                                                                                                    |   |                   |                      |          |                  |                            |   |                  |               |                |                  |                        |   |                  |                                      |   |                  |                                                                        |   |                  |                    |   |                  |                  |   |                  |                                  |    |                   |                                                               |    |                   |              |    |                   |                                               |    |                   |                                                               |    |                   |            |    |                   |       |
| 15 | pro_obstacles__15                                                                    | Other                                                                                                                                                                                 |                                                                                                                                                                                                                                                                                                                                                                                                                                                                                                                                                                                                                                                                                                                                                                                                                                                                                                                                                                                                                                                                                                                                                                                                                                                                                                                                                                                                                                                    |   |                   |                      |          |                  |                            |   |                  |               |                |                  |                        |   |                  |                                      |   |                  |                                                                        |   |                  |                    |   |                  |                  |   |                  |                                  |    |                   |                                                               |    |                   |              |    |                   |                                               |    |                   |                                                               |    |                   |            |    |                   |       |
| 62 | pro_obstaclesautre<br>Afficher le champ UNIQUEMENT si :<br>[pro_obstacles(13)] = '1' | If other, please specify:                                                                                                                                                             | <p>text</p> <p>Alignement personnalisé : LV</p>                                                                                                                                                                                                                                                                                                                                                                                                                                                                                                                                                                                                                                                                                                                                                                                                                                                                                                                                                                                                                                                                                                                                                                                                                                                                                                                                                                                                    |   |                   |                      |          |                  |                            |   |                  |               |                |                  |                        |   |                  |                                      |   |                  |                                                                        |   |                  |                    |   |                  |                  |   |                  |                                  |    |                   |                                                               |    |                   |              |    |                   |                                               |    |                   |                                                               |    |                   |            |    |                   |       |
| 63 | pro_bidon5                                                                           | Please check the box that best corresponds to your opinion.                                                                                                                           | <p>descriptive</p>                                                                                                                                                                                                                                                                                                                                                                                                                                                                                                                                                                                                                                                                                                                                                                                                                                                                                                                                                                                                                                                                                                                                                                                                                                                                                                                                                                                                                                 |   |                   |                      |          |                  |                            |   |                  |               |                |                  |                        |   |                  |                                      |   |                  |                                                                        |   |                  |                    |   |                  |                  |   |                  |                                  |    |                   |                                                               |    |                   |              |    |                   |                                               |    |                   |                                                               |    |                   |            |    |                   |       |
| 64 | pro_parplan                                                                          | I believe in the importance of patient and family involvement in planning and decision-making for one's own care.                                                                     | <p>radio (Matrice)</p> <table border="1"> <tr> <td>0</td> <td>Strongly Disagree</td> </tr> <tr> <td>1</td> <td>Disagree</td> </tr> <tr> <td>2</td> <td>Neither agree nor disagree</td> </tr> <tr> <td>3</td> <td>Agree</td> </tr> <tr> <td>4</td> <td>Strongly agree</td> </tr> </table>                                                                                                                                                                                                                                                                                                                                                                                                                                                                                                                                                                                                                                                                                                                                                                                                                                                                                                                                                                                                                                                                                                                                                           | 0 | Strongly Disagree | 1                    | Disagree | 2                | Neither agree nor disagree | 3 | Agree            | 4             | Strongly agree |                  |                        |   |                  |                                      |   |                  |                                                                        |   |                  |                    |   |                  |                  |   |                  |                                  |    |                   |                                                               |    |                   |              |    |                   |                                               |    |                   |                                                               |    |                   |            |    |                   |       |
| 0  | Strongly Disagree                                                                    |                                                                                                                                                                                       |                                                                                                                                                                                                                                                                                                                                                                                                                                                                                                                                                                                                                                                                                                                                                                                                                                                                                                                                                                                                                                                                                                                                                                                                                                                                                                                                                                                                                                                    |   |                   |                      |          |                  |                            |   |                  |               |                |                  |                        |   |                  |                                      |   |                  |                                                                        |   |                  |                    |   |                  |                  |   |                  |                                  |    |                   |                                                               |    |                   |              |    |                   |                                               |    |                   |                                                               |    |                   |            |    |                   |       |
| 1  | Disagree                                                                             |                                                                                                                                                                                       |                                                                                                                                                                                                                                                                                                                                                                                                                                                                                                                                                                                                                                                                                                                                                                                                                                                                                                                                                                                                                                                                                                                                                                                                                                                                                                                                                                                                                                                    |   |                   |                      |          |                  |                            |   |                  |               |                |                  |                        |   |                  |                                      |   |                  |                                                                        |   |                  |                    |   |                  |                  |   |                  |                                  |    |                   |                                                               |    |                   |              |    |                   |                                               |    |                   |                                                               |    |                   |            |    |                   |       |
| 2  | Neither agree nor disagree                                                           |                                                                                                                                                                                       |                                                                                                                                                                                                                                                                                                                                                                                                                                                                                                                                                                                                                                                                                                                                                                                                                                                                                                                                                                                                                                                                                                                                                                                                                                                                                                                                                                                                                                                    |   |                   |                      |          |                  |                            |   |                  |               |                |                  |                        |   |                  |                                      |   |                  |                                                                        |   |                  |                    |   |                  |                  |   |                  |                                  |    |                   |                                                               |    |                   |              |    |                   |                                               |    |                   |                                                               |    |                   |            |    |                   |       |
| 3  | Agree                                                                                |                                                                                                                                                                                       |                                                                                                                                                                                                                                                                                                                                                                                                                                                                                                                                                                                                                                                                                                                                                                                                                                                                                                                                                                                                                                                                                                                                                                                                                                                                                                                                                                                                                                                    |   |                   |                      |          |                  |                            |   |                  |               |                |                  |                        |   |                  |                                      |   |                  |                                                                        |   |                  |                    |   |                  |                  |   |                  |                                  |    |                   |                                                               |    |                   |              |    |                   |                                               |    |                   |                                                               |    |                   |            |    |                   |       |
| 4  | Strongly agree                                                                       |                                                                                                                                                                                       |                                                                                                                                                                                                                                                                                                                                                                                                                                                                                                                                                                                                                                                                                                                                                                                                                                                                                                                                                                                                                                                                                                                                                                                                                                                                                                                                                                                                                                                    |   |                   |                      |          |                  |                            |   |                  |               |                |                  |                        |   |                  |                                      |   |                  |                                                                        |   |                  |                    |   |                  |                  |   |                  |                                  |    |                   |                                                               |    |                   |              |    |                   |                                               |    |                   |                                                               |    |                   |            |    |                   |       |
| 65 | pro_pvtous                                                                           | I believe that the views and opinions of patients and their families are just as valid as those of staff and clinicians in planning and making decisions about a patient's care plan. | <p>radio (Matrice)</p> <table border="1"> <tr> <td>0</td> <td>Strongly Disagree</td> </tr> <tr> <td>1</td> <td>Disagree</td> </tr> <tr> <td>2</td> <td>Neither agree nor disagree</td> </tr> <tr> <td>3</td> <td>Agree</td> </tr> <tr> <td>4</td> <td>Strongly agree</td> </tr> </table>                                                                                                                                                                                                                                                                                                                                                                                                                                                                                                                                                                                                                                                                                                                                                                                                                                                                                                                                                                                                                                                                                                                                                           | 0 | Strongly Disagree | 1                    | Disagree | 2                | Neither agree nor disagree | 3 | Agree            | 4             | Strongly agree |                  |                        |   |                  |                                      |   |                  |                                                                        |   |                  |                    |   |                  |                  |   |                  |                                  |    |                   |                                                               |    |                   |              |    |                   |                                               |    |                   |                                                               |    |                   |            |    |                   |       |
| 0  | Strongly Disagree                                                                    |                                                                                                                                                                                       |                                                                                                                                                                                                                                                                                                                                                                                                                                                                                                                                                                                                                                                                                                                                                                                                                                                                                                                                                                                                                                                                                                                                                                                                                                                                                                                                                                                                                                                    |   |                   |                      |          |                  |                            |   |                  |               |                |                  |                        |   |                  |                                      |   |                  |                                                                        |   |                  |                    |   |                  |                  |   |                  |                                  |    |                   |                                                               |    |                   |              |    |                   |                                               |    |                   |                                                               |    |                   |            |    |                   |       |
| 1  | Disagree                                                                             |                                                                                                                                                                                       |                                                                                                                                                                                                                                                                                                                                                                                                                                                                                                                                                                                                                                                                                                                                                                                                                                                                                                                                                                                                                                                                                                                                                                                                                                                                                                                                                                                                                                                    |   |                   |                      |          |                  |                            |   |                  |               |                |                  |                        |   |                  |                                      |   |                  |                                                                        |   |                  |                    |   |                  |                  |   |                  |                                  |    |                   |                                                               |    |                   |              |    |                   |                                               |    |                   |                                                               |    |                   |            |    |                   |       |
| 2  | Neither agree nor disagree                                                           |                                                                                                                                                                                       |                                                                                                                                                                                                                                                                                                                                                                                                                                                                                                                                                                                                                                                                                                                                                                                                                                                                                                                                                                                                                                                                                                                                                                                                                                                                                                                                                                                                                                                    |   |                   |                      |          |                  |                            |   |                  |               |                |                  |                        |   |                  |                                      |   |                  |                                                                        |   |                  |                    |   |                  |                  |   |                  |                                  |    |                   |                                                               |    |                   |              |    |                   |                                               |    |                   |                                                               |    |                   |            |    |                   |       |
| 3  | Agree                                                                                |                                                                                                                                                                                       |                                                                                                                                                                                                                                                                                                                                                                                                                                                                                                                                                                                                                                                                                                                                                                                                                                                                                                                                                                                                                                                                                                                                                                                                                                                                                                                                                                                                                                                    |   |                   |                      |          |                  |                            |   |                  |               |                |                  |                        |   |                  |                                      |   |                  |                                                                        |   |                  |                    |   |                  |                  |   |                  |                                  |    |                   |                                                               |    |                   |              |    |                   |                                               |    |                   |                                                               |    |                   |            |    |                   |       |
| 4  | Strongly agree                                                                       |                                                                                                                                                                                       |                                                                                                                                                                                                                                                                                                                                                                                                                                                                                                                                                                                                                                                                                                                                                                                                                                                                                                                                                                                                                                                                                                                                                                                                                                                                                                                                                                                                                                                    |   |                   |                      |          |                  |                            |   |                  |               |                |                  |                        |   |                  |                                      |   |                  |                                                                        |   |                  |                    |   |                  |                  |   |                  |                                  |    |                   |                                                               |    |                   |              |    |                   |                                               |    |                   |                                                               |    |                   |            |    |                   |       |

|    |                            |                                                                                                              |                                                                                                                                                                                                                                                                    |   |                   |   |          |   |                            |   |       |   |                |
|----|----------------------------|--------------------------------------------------------------------------------------------------------------|--------------------------------------------------------------------------------------------------------------------------------------------------------------------------------------------------------------------------------------------------------------------|---|-------------------|---|----------|---|----------------------------|---|-------|---|----------------|
| 66 | pro_utileepi               | I believe that involving the PA in the planning and decision-making of a patient's care plan can be helpful. | radio (Matrice) <table border="1"> <tr><td>0</td><td>Strongly Disagree</td></tr> <tr><td>1</td><td>Disagree</td></tr> <tr><td>2</td><td>Neither agree nor disagree</td></tr> <tr><td>3</td><td>Agree</td></tr> <tr><td>4</td><td>Strongly agree</td></tr> </table> | 0 | Strongly Disagree | 1 | Disagree | 2 | Neither agree nor disagree | 3 | Agree | 4 | Strongly agree |
| 0  | Strongly Disagree          |                                                                                                              |                                                                                                                                                                                                                                                                    |   |                   |   |          |   |                            |   |       |   |                |
| 1  | Disagree                   |                                                                                                              |                                                                                                                                                                                                                                                                    |   |                   |   |          |   |                            |   |       |   |                |
| 2  | Neither agree nor disagree |                                                                                                              |                                                                                                                                                                                                                                                                    |   |                   |   |          |   |                            |   |       |   |                |
| 3  | Agree                      |                                                                                                              |                                                                                                                                                                                                                                                                    |   |                   |   |          |   |                            |   |       |   |                |
| 4  | Strongly agree             |                                                                                                              |                                                                                                                                                                                                                                                                    |   |                   |   |          |   |                            |   |       |   |                |
| 67 | pro_contribu               | I believe that PAs can contribute at the same level as health care providers in the provision of services.   | radio (Matrice) <table border="1"> <tr><td>0</td><td>Strongly Disagree</td></tr> <tr><td>1</td><td>Disagree</td></tr> <tr><td>2</td><td>Neither agree nor disagree</td></tr> <tr><td>3</td><td>Agree</td></tr> <tr><td>4</td><td>Strongly agree</td></tr> </table> | 0 | Strongly Disagree | 1 | Disagree | 2 | Neither agree nor disagree | 3 | Agree | 4 | Strongly agree |
| 0  | Strongly Disagree          |                                                                                                              |                                                                                                                                                                                                                                                                    |   |                   |   |          |   |                            |   |       |   |                |
| 1  | Disagree                   |                                                                                                              |                                                                                                                                                                                                                                                                    |   |                   |   |          |   |                            |   |       |   |                |
| 2  | Neither agree nor disagree |                                                                                                              |                                                                                                                                                                                                                                                                    |   |                   |   |          |   |                            |   |       |   |                |
| 3  | Agree                      |                                                                                                              |                                                                                                                                                                                                                                                                    |   |                   |   |          |   |                            |   |       |   |                |
| 4  | Strongly agree             |                                                                                                              |                                                                                                                                                                                                                                                                    |   |                   |   |          |   |                            |   |       |   |                |
| 68 | pro_initiative             | I am comfortable asking for PAs to be invited to participate in initiatives.                                 | radio (Matrice) <table border="1"> <tr><td>0</td><td>Strongly disagree</td></tr> <tr><td>1</td><td>Disagree</td></tr> <tr><td>2</td><td>Neither agree nor disagree</td></tr> <tr><td>3</td><td>Agree</td></tr> <tr><td>4</td><td>Strongly agree</td></tr> </table> | 0 | Strongly disagree | 1 | Disagree | 2 | Neither agree nor disagree | 3 | Agree | 4 | Strongly agree |
| 0  | Strongly disagree          |                                                                                                              |                                                                                                                                                                                                                                                                    |   |                   |   |          |   |                            |   |       |   |                |
| 1  | Disagree                   |                                                                                                              |                                                                                                                                                                                                                                                                    |   |                   |   |          |   |                            |   |       |   |                |
| 2  | Neither agree nor disagree |                                                                                                              |                                                                                                                                                                                                                                                                    |   |                   |   |          |   |                            |   |       |   |                |
| 3  | Agree                      |                                                                                                              |                                                                                                                                                                                                                                                                    |   |                   |   |          |   |                            |   |       |   |                |
| 4  | Strongly agree             |                                                                                                              |                                                                                                                                                                                                                                                                    |   |                   |   |          |   |                            |   |       |   |                |
| 69 | pro_chargetrav             | I consider that the participation of PAs does not increase my workload.                                      | radio (Matrice) <table border="1"> <tr><td>0</td><td>Strongly disagree</td></tr> <tr><td>1</td><td>Disagree</td></tr> <tr><td>2</td><td>Neither agree nor disagree</td></tr> <tr><td>3</td><td>Agree</td></tr> <tr><td>4</td><td>Strongly agree</td></tr> </table> | 0 | Strongly disagree | 1 | Disagree | 2 | Neither agree nor disagree | 3 | Agree | 4 | Strongly agree |
| 0  | Strongly disagree          |                                                                                                              |                                                                                                                                                                                                                                                                    |   |                   |   |          |   |                            |   |       |   |                |
| 1  | Disagree                   |                                                                                                              |                                                                                                                                                                                                                                                                    |   |                   |   |          |   |                            |   |       |   |                |
| 2  | Neither agree nor disagree |                                                                                                              |                                                                                                                                                                                                                                                                    |   |                   |   |          |   |                            |   |       |   |                |
| 3  | Agree                      |                                                                                                              |                                                                                                                                                                                                                                                                    |   |                   |   |          |   |                            |   |       |   |                |
| 4  | Strongly agree             |                                                                                                              |                                                                                                                                                                                                                                                                    |   |                   |   |          |   |                            |   |       |   |                |
| 70 | pro_respro                 | I wonder about my professional responsibility towards the participation of PAs.                              | radio (Matrice) <table border="1"> <tr><td>0</td><td>Strongly disagree</td></tr> <tr><td>1</td><td>Disagree</td></tr> <tr><td>2</td><td>Neither agree nor disagree</td></tr> <tr><td>3</td><td>Agree</td></tr> <tr><td>4</td><td>Strongly agree</td></tr> </table> | 0 | Strongly disagree | 1 | Disagree | 2 | Neither agree nor disagree | 3 | Agree | 4 | Strongly agree |
| 0  | Strongly disagree          |                                                                                                              |                                                                                                                                                                                                                                                                    |   |                   |   |          |   |                            |   |       |   |                |
| 1  | Disagree                   |                                                                                                              |                                                                                                                                                                                                                                                                    |   |                   |   |          |   |                            |   |       |   |                |
| 2  | Neither agree nor disagree |                                                                                                              |                                                                                                                                                                                                                                                                    |   |                   |   |          |   |                            |   |       |   |                |
| 3  | Agree                      |                                                                                                              |                                                                                                                                                                                                                                                                    |   |                   |   |          |   |                            |   |       |   |                |
| 4  | Strongly agree             |                                                                                                              |                                                                                                                                                                                                                                                                    |   |                   |   |          |   |                            |   |       |   |                |
| 71 | pro_enjeu                  | I wonder about the legal issues related to the participation of PAs in my organization.                      | radio (Matrice) <table border="1"> <tr><td>0</td><td>Strongly disagree</td></tr> <tr><td>1</td><td>Disagree</td></tr> <tr><td>2</td><td>Neither agree nor disagree</td></tr> <tr><td>3</td><td>Agree</td></tr> <tr><td>4</td><td>Strongly agree</td></tr> </table> | 0 | Strongly disagree | 1 | Disagree | 2 | Neither agree nor disagree | 3 | Agree | 4 | Strongly agree |
| 0  | Strongly disagree          |                                                                                                              |                                                                                                                                                                                                                                                                    |   |                   |   |          |   |                            |   |       |   |                |
| 1  | Disagree                   |                                                                                                              |                                                                                                                                                                                                                                                                    |   |                   |   |          |   |                            |   |       |   |                |
| 2  | Neither agree nor disagree |                                                                                                              |                                                                                                                                                                                                                                                                    |   |                   |   |          |   |                            |   |       |   |                |
| 3  | Agree                      |                                                                                                              |                                                                                                                                                                                                                                                                    |   |                   |   |          |   |                            |   |       |   |                |
| 4  | Strongly agree             |                                                                                                              |                                                                                                                                                                                                                                                                    |   |                   |   |          |   |                            |   |       |   |                |
| 72 | pro_perspect               | I believe that PAs bring an interesting perspective to improve the service offer.                            | radio (Matrice) <table border="1"> <tr><td>0</td><td>Strongly disagree</td></tr> <tr><td>1</td><td>Disagree</td></tr> <tr><td>2</td><td>Neither agree nor disagree</td></tr> <tr><td>3</td><td>Agree</td></tr> <tr><td>4</td><td>Strongly agree</td></tr> </table> | 0 | Strongly disagree | 1 | Disagree | 2 | Neither agree nor disagree | 3 | Agree | 4 | Strongly agree |
| 0  | Strongly disagree          |                                                                                                              |                                                                                                                                                                                                                                                                    |   |                   |   |          |   |                            |   |       |   |                |
| 1  | Disagree                   |                                                                                                              |                                                                                                                                                                                                                                                                    |   |                   |   |          |   |                            |   |       |   |                |
| 2  | Neither agree nor disagree |                                                                                                              |                                                                                                                                                                                                                                                                    |   |                   |   |          |   |                            |   |       |   |                |
| 3  | Agree                      |                                                                                                              |                                                                                                                                                                                                                                                                    |   |                   |   |          |   |                            |   |       |   |                |
| 4  | Strongly agree             |                                                                                                              |                                                                                                                                                                                                                                                                    |   |                   |   |          |   |                            |   |       |   |                |
| 73 | pro_membre                 | I consider PAs to be full-fledged members of the health care team.                                           | radio (Matrice) <table border="1"> <tr><td>0</td><td>Strongly disagree</td></tr> <tr><td>1</td><td>Disagree</td></tr> <tr><td>2</td><td>Neither agree nor disagree</td></tr> <tr><td>3</td><td>Agree</td></tr> <tr><td>4</td><td>Strongly agree</td></tr> </table> | 0 | Strongly disagree | 1 | Disagree | 2 | Neither agree nor disagree | 3 | Agree | 4 | Strongly agree |
| 0  | Strongly disagree          |                                                                                                              |                                                                                                                                                                                                                                                                    |   |                   |   |          |   |                            |   |       |   |                |
| 1  | Disagree                   |                                                                                                              |                                                                                                                                                                                                                                                                    |   |                   |   |          |   |                            |   |       |   |                |
| 2  | Neither agree nor disagree |                                                                                                              |                                                                                                                                                                                                                                                                    |   |                   |   |          |   |                            |   |       |   |                |
| 3  | Agree                      |                                                                                                              |                                                                                                                                                                                                                                                                    |   |                   |   |          |   |                            |   |       |   |                |
| 4  | Strongly agree             |                                                                                                              |                                                                                                                                                                                                                                                                    |   |                   |   |          |   |                            |   |       |   |                |

|                                                                                                                                                 |                                                    |                                                                                                                                                                                                                                                                            |                                                                                                                                                                                                                                                                                                                                                                                                                                                                                                                                                                                                                                                                                                                                                                                                                                                                                                                                 |   |                        |   |                              |   |                            |   |               |   |                |   |               |   |                |   |                            |   |                |   |                     |    |                                    |    |                           |    |            |    |                 |    |                  |    |                 |    |                       |
|-------------------------------------------------------------------------------------------------------------------------------------------------|----------------------------------------------------|----------------------------------------------------------------------------------------------------------------------------------------------------------------------------------------------------------------------------------------------------------------------------|---------------------------------------------------------------------------------------------------------------------------------------------------------------------------------------------------------------------------------------------------------------------------------------------------------------------------------------------------------------------------------------------------------------------------------------------------------------------------------------------------------------------------------------------------------------------------------------------------------------------------------------------------------------------------------------------------------------------------------------------------------------------------------------------------------------------------------------------------------------------------------------------------------------------------------|---|------------------------|---|------------------------------|---|----------------------------|---|---------------|---|----------------|---|---------------|---|----------------|---|----------------------------|---|----------------|---|---------------------|----|------------------------------------|----|---------------------------|----|------------|----|-----------------|----|------------------|----|-----------------|----|-----------------------|
| 74                                                                                                                                              | pro_favo                                           | My organization promotes the participation of PAs in my daily work.                                                                                                                                                                                                        | <p>radio (Matrice)</p> <table border="1"> <tr><td>0</td><td>Strongly disagree</td></tr> <tr><td>1</td><td>Disagree</td></tr> <tr><td>2</td><td>Neither agree nor disagree</td></tr> <tr><td>3</td><td>Agree</td></tr> <tr><td>4</td><td>Strongly agree</td></tr> </table>                                                                                                                                                                                                                                                                                                                                                                                                                                                                                                                                                                                                                                                       | 0 | Strongly disagree      | 1 | Disagree                     | 2 | Neither agree nor disagree | 3 | Agree         | 4 | Strongly agree |   |               |   |                |   |                            |   |                |   |                     |    |                                    |    |                           |    |            |    |                 |    |                  |    |                 |    |                       |
| 0                                                                                                                                               | Strongly disagree                                  |                                                                                                                                                                                                                                                                            |                                                                                                                                                                                                                                                                                                                                                                                                                                                                                                                                                                                                                                                                                                                                                                                                                                                                                                                                 |   |                        |   |                              |   |                            |   |               |   |                |   |               |   |                |   |                            |   |                |   |                     |    |                                    |    |                           |    |            |    |                 |    |                  |    |                 |    |                       |
| 1                                                                                                                                               | Disagree                                           |                                                                                                                                                                                                                                                                            |                                                                                                                                                                                                                                                                                                                                                                                                                                                                                                                                                                                                                                                                                                                                                                                                                                                                                                                                 |   |                        |   |                              |   |                            |   |               |   |                |   |               |   |                |   |                            |   |                |   |                     |    |                                    |    |                           |    |            |    |                 |    |                  |    |                 |    |                       |
| 2                                                                                                                                               | Neither agree nor disagree                         |                                                                                                                                                                                                                                                                            |                                                                                                                                                                                                                                                                                                                                                                                                                                                                                                                                                                                                                                                                                                                                                                                                                                                                                                                                 |   |                        |   |                              |   |                            |   |               |   |                |   |               |   |                |   |                            |   |                |   |                     |    |                                    |    |                           |    |            |    |                 |    |                  |    |                 |    |                       |
| 3                                                                                                                                               | Agree                                              |                                                                                                                                                                                                                                                                            |                                                                                                                                                                                                                                                                                                                                                                                                                                                                                                                                                                                                                                                                                                                                                                                                                                                                                                                                 |   |                        |   |                              |   |                            |   |               |   |                |   |               |   |                |   |                            |   |                |   |                     |    |                                    |    |                           |    |            |    |                 |    |                  |    |                 |    |                       |
| 4                                                                                                                                               | Strongly agree                                     |                                                                                                                                                                                                                                                                            |                                                                                                                                                                                                                                                                                                                                                                                                                                                                                                                                                                                                                                                                                                                                                                                                                                                                                                                                 |   |                        |   |                              |   |                            |   |               |   |                |   |               |   |                |   |                            |   |                |   |                     |    |                                    |    |                           |    |            |    |                 |    |                  |    |                 |    |                       |
| 75                                                                                                                                              | pro_formcont                                       | Have you had continuing education about the partnership of care?                                                                                                                                                                                                           | <p>radio</p> <table border="1"> <tr><td>0</td><td>No</td></tr> <tr><td>1</td><td>Yes</td></tr> </table> <p>Alignement personnalisé : LV</p>                                                                                                                                                                                                                                                                                                                                                                                                                                                                                                                                                                                                                                                                                                                                                                                     | 0 | No                     | 1 | Yes                          |   |                            |   |               |   |                |   |               |   |                |   |                            |   |                |   |                     |    |                                    |    |                           |    |            |    |                 |    |                  |    |                 |    |                       |
| 0                                                                                                                                               | No                                                 |                                                                                                                                                                                                                                                                            |                                                                                                                                                                                                                                                                                                                                                                                                                                                                                                                                                                                                                                                                                                                                                                                                                                                                                                                                 |   |                        |   |                              |   |                            |   |               |   |                |   |               |   |                |   |                            |   |                |   |                     |    |                                    |    |                           |    |            |    |                 |    |                  |    |                 |    |                       |
| 1                                                                                                                                               | Yes                                                |                                                                                                                                                                                                                                                                            |                                                                                                                                                                                                                                                                                                                                                                                                                                                                                                                                                                                                                                                                                                                                                                                                                                                                                                                                 |   |                        |   |                              |   |                            |   |               |   |                |   |               |   |                |   |                            |   |                |   |                     |    |                                    |    |                           |    |            |    |                 |    |                  |    |                 |    |                       |
| 76                                                                                                                                              | nul                                                | <p>Thank you for contributing to the improvement of patient well-being.<br/>Thank you for completing this questionnaire.</p> <p>Please click on the check mark to access the socio-demographic questionnaire which will complete the questionnaire.</p>                    | descriptive                                                                                                                                                                                                                                                                                                                                                                                                                                                                                                                                                                                                                                                                                                                                                                                                                                                                                                                     |   |                        |   |                              |   |                            |   |               |   |                |   |               |   |                |   |                            |   |                |   |                     |    |                                    |    |                           |    |            |    |                 |    |                  |    |                 |    |                       |
| 77                                                                                                                                              | pro_bidonreft1                                     | <p>En-tête de section : <i>REFERENCES</i></p> <p>Collaborative practice assessment tool (CPAT) © mars 2009<br/>Owned by the Office of Interprofessional Education and Practice. Queen's University.</p> <p>Group Innovation Inventory, Caldwell DF, O'Reilly CA (2003)</p> | descriptive                                                                                                                                                                                                                                                                                                                                                                                                                                                                                                                                                                                                                                                                                                                                                                                                                                                                                                                     |   |                        |   |                              |   |                            |   |               |   |                |   |               |   |                |   |                            |   |                |   |                     |    |                                    |    |                           |    |            |    |                 |    |                  |    |                 |    |                       |
| 78                                                                                                                                              | pro_depot                                          | For the administration: submission of the paper questionnaire                                                                                                                                                                                                              | file                                                                                                                                                                                                                                                                                                                                                                                                                                                                                                                                                                                                                                                                                                                                                                                                                                                                                                                            |   |                        |   |                              |   |                            |   |               |   |                |   |               |   |                |   |                            |   |                |   |                     |    |                                    |    |                           |    |            |    |                 |    |                  |    |                 |    |                       |
| 79                                                                                                                                              | paroleonco_questionnaire_t0_clinical_team_complete | <p>En-tête de section : <i>Form Status</i></p> <p>Complete?</p>                                                                                                                                                                                                            | <p>dropdown</p> <table border="1"> <tr><td>0</td><td>Incomplete</td></tr> <tr><td>1</td><td>Unverified</td></tr> <tr><td>2</td><td>Complete</td></tr> </table>                                                                                                                                                                                                                                                                                                                                                                                                                                                                                                                                                                                                                                                                                                                                                                  | 0 | Incomplete             | 1 | Unverified                   | 2 | Complete                   |   |               |   |                |   |               |   |                |   |                            |   |                |   |                     |    |                                    |    |                           |    |            |    |                 |    |                  |    |                 |    |                       |
| 0                                                                                                                                               | Incomplete                                         |                                                                                                                                                                                                                                                                            |                                                                                                                                                                                                                                                                                                                                                                                                                                                                                                                                                                                                                                                                                                                                                                                                                                                                                                                                 |   |                        |   |                              |   |                            |   |               |   |                |   |               |   |                |   |                            |   |                |   |                     |    |                                    |    |                           |    |            |    |                 |    |                  |    |                 |    |                       |
| 1                                                                                                                                               | Unverified                                         |                                                                                                                                                                                                                                                                            |                                                                                                                                                                                                                                                                                                                                                                                                                                                                                                                                                                                                                                                                                                                                                                                                                                                                                                                                 |   |                        |   |                              |   |                            |   |               |   |                |   |               |   |                |   |                            |   |                |   |                     |    |                                    |    |                           |    |            |    |                 |    |                  |    |                 |    |                       |
| 2                                                                                                                                               | Complete                                           |                                                                                                                                                                                                                                                                            |                                                                                                                                                                                                                                                                                                                                                                                                                                                                                                                                                                                                                                                                                                                                                                                                                                                                                                                                 |   |                        |   |                              |   |                            |   |               |   |                |   |               |   |                |   |                            |   |                |   |                     |    |                                    |    |                           |    |            |    |                 |    |                  |    |                 |    |                       |
| <p>Formulaire : <b>PAROLE-Onco - Socio-demographic questionnaire</b> (paroleonco_sociodemographic_questionnaire) <a href="#">^ Collapse</a></p> |                                                    |                                                                                                                                                                                                                                                                            |                                                                                                                                                                                                                                                                                                                                                                                                                                                                                                                                                                                                                                                                                                                                                                                                                                                                                                                                 |   |                        |   |                              |   |                            |   |               |   |                |   |               |   |                |   |                            |   |                |   |                     |    |                                    |    |                           |    |            |    |                 |    |                  |    |                 |    |                       |
| 80                                                                                                                                              | pro_region                                         | In which administrative region do you predominantly practice your profession?                                                                                                                                                                                              | <p>radio</p> <table border="1"> <tr><td>0</td><td>Bas-Saint-Laurent (01)</td></tr> <tr><td>1</td><td>Saguenay-Lac-Saint-Jean (02)</td></tr> <tr><td>2</td><td>Capitale-Nationale (03)</td></tr> <tr><td>3</td><td>Mauricie (04)</td></tr> <tr><td>4</td><td>Estrie (05)</td></tr> <tr><td>5</td><td>Montréal (06)</td></tr> <tr><td>6</td><td>Outaouais (07)</td></tr> <tr><td>7</td><td>Abitibi-Témiscamingue (08)</td></tr> <tr><td>8</td><td>Côte-Nord (09)</td></tr> <tr><td>9</td><td>Nord-du-Québec (10)</td></tr> <tr><td>10</td><td>Gaspésie-Îles-de-la-Madeleine (11)</td></tr> <tr><td>11</td><td>Chaudière-Appalaches (12)</td></tr> <tr><td>12</td><td>Laval (13)</td></tr> <tr><td>13</td><td>Lanaudière (14)</td></tr> <tr><td>14</td><td>Laurentides (15)</td></tr> <tr><td>15</td><td>Montérégie (16)</td></tr> <tr><td>16</td><td>Centre-du-Québec (17)</td></tr> </table> <p>Alignement personnalisé : LV</p> | 0 | Bas-Saint-Laurent (01) | 1 | Saguenay-Lac-Saint-Jean (02) | 2 | Capitale-Nationale (03)    | 3 | Mauricie (04) | 4 | Estrie (05)    | 5 | Montréal (06) | 6 | Outaouais (07) | 7 | Abitibi-Témiscamingue (08) | 8 | Côte-Nord (09) | 9 | Nord-du-Québec (10) | 10 | Gaspésie-Îles-de-la-Madeleine (11) | 11 | Chaudière-Appalaches (12) | 12 | Laval (13) | 13 | Lanaudière (14) | 14 | Laurentides (15) | 15 | Montérégie (16) | 16 | Centre-du-Québec (17) |
| 0                                                                                                                                               | Bas-Saint-Laurent (01)                             |                                                                                                                                                                                                                                                                            |                                                                                                                                                                                                                                                                                                                                                                                                                                                                                                                                                                                                                                                                                                                                                                                                                                                                                                                                 |   |                        |   |                              |   |                            |   |               |   |                |   |               |   |                |   |                            |   |                |   |                     |    |                                    |    |                           |    |            |    |                 |    |                  |    |                 |    |                       |
| 1                                                                                                                                               | Saguenay-Lac-Saint-Jean (02)                       |                                                                                                                                                                                                                                                                            |                                                                                                                                                                                                                                                                                                                                                                                                                                                                                                                                                                                                                                                                                                                                                                                                                                                                                                                                 |   |                        |   |                              |   |                            |   |               |   |                |   |               |   |                |   |                            |   |                |   |                     |    |                                    |    |                           |    |            |    |                 |    |                  |    |                 |    |                       |
| 2                                                                                                                                               | Capitale-Nationale (03)                            |                                                                                                                                                                                                                                                                            |                                                                                                                                                                                                                                                                                                                                                                                                                                                                                                                                                                                                                                                                                                                                                                                                                                                                                                                                 |   |                        |   |                              |   |                            |   |               |   |                |   |               |   |                |   |                            |   |                |   |                     |    |                                    |    |                           |    |            |    |                 |    |                  |    |                 |    |                       |
| 3                                                                                                                                               | Mauricie (04)                                      |                                                                                                                                                                                                                                                                            |                                                                                                                                                                                                                                                                                                                                                                                                                                                                                                                                                                                                                                                                                                                                                                                                                                                                                                                                 |   |                        |   |                              |   |                            |   |               |   |                |   |               |   |                |   |                            |   |                |   |                     |    |                                    |    |                           |    |            |    |                 |    |                  |    |                 |    |                       |
| 4                                                                                                                                               | Estrie (05)                                        |                                                                                                                                                                                                                                                                            |                                                                                                                                                                                                                                                                                                                                                                                                                                                                                                                                                                                                                                                                                                                                                                                                                                                                                                                                 |   |                        |   |                              |   |                            |   |               |   |                |   |               |   |                |   |                            |   |                |   |                     |    |                                    |    |                           |    |            |    |                 |    |                  |    |                 |    |                       |
| 5                                                                                                                                               | Montréal (06)                                      |                                                                                                                                                                                                                                                                            |                                                                                                                                                                                                                                                                                                                                                                                                                                                                                                                                                                                                                                                                                                                                                                                                                                                                                                                                 |   |                        |   |                              |   |                            |   |               |   |                |   |               |   |                |   |                            |   |                |   |                     |    |                                    |    |                           |    |            |    |                 |    |                  |    |                 |    |                       |
| 6                                                                                                                                               | Outaouais (07)                                     |                                                                                                                                                                                                                                                                            |                                                                                                                                                                                                                                                                                                                                                                                                                                                                                                                                                                                                                                                                                                                                                                                                                                                                                                                                 |   |                        |   |                              |   |                            |   |               |   |                |   |               |   |                |   |                            |   |                |   |                     |    |                                    |    |                           |    |            |    |                 |    |                  |    |                 |    |                       |
| 7                                                                                                                                               | Abitibi-Témiscamingue (08)                         |                                                                                                                                                                                                                                                                            |                                                                                                                                                                                                                                                                                                                                                                                                                                                                                                                                                                                                                                                                                                                                                                                                                                                                                                                                 |   |                        |   |                              |   |                            |   |               |   |                |   |               |   |                |   |                            |   |                |   |                     |    |                                    |    |                           |    |            |    |                 |    |                  |    |                 |    |                       |
| 8                                                                                                                                               | Côte-Nord (09)                                     |                                                                                                                                                                                                                                                                            |                                                                                                                                                                                                                                                                                                                                                                                                                                                                                                                                                                                                                                                                                                                                                                                                                                                                                                                                 |   |                        |   |                              |   |                            |   |               |   |                |   |               |   |                |   |                            |   |                |   |                     |    |                                    |    |                           |    |            |    |                 |    |                  |    |                 |    |                       |
| 9                                                                                                                                               | Nord-du-Québec (10)                                |                                                                                                                                                                                                                                                                            |                                                                                                                                                                                                                                                                                                                                                                                                                                                                                                                                                                                                                                                                                                                                                                                                                                                                                                                                 |   |                        |   |                              |   |                            |   |               |   |                |   |               |   |                |   |                            |   |                |   |                     |    |                                    |    |                           |    |            |    |                 |    |                  |    |                 |    |                       |
| 10                                                                                                                                              | Gaspésie-Îles-de-la-Madeleine (11)                 |                                                                                                                                                                                                                                                                            |                                                                                                                                                                                                                                                                                                                                                                                                                                                                                                                                                                                                                                                                                                                                                                                                                                                                                                                                 |   |                        |   |                              |   |                            |   |               |   |                |   |               |   |                |   |                            |   |                |   |                     |    |                                    |    |                           |    |            |    |                 |    |                  |    |                 |    |                       |
| 11                                                                                                                                              | Chaudière-Appalaches (12)                          |                                                                                                                                                                                                                                                                            |                                                                                                                                                                                                                                                                                                                                                                                                                                                                                                                                                                                                                                                                                                                                                                                                                                                                                                                                 |   |                        |   |                              |   |                            |   |               |   |                |   |               |   |                |   |                            |   |                |   |                     |    |                                    |    |                           |    |            |    |                 |    |                  |    |                 |    |                       |
| 12                                                                                                                                              | Laval (13)                                         |                                                                                                                                                                                                                                                                            |                                                                                                                                                                                                                                                                                                                                                                                                                                                                                                                                                                                                                                                                                                                                                                                                                                                                                                                                 |   |                        |   |                              |   |                            |   |               |   |                |   |               |   |                |   |                            |   |                |   |                     |    |                                    |    |                           |    |            |    |                 |    |                  |    |                 |    |                       |
| 13                                                                                                                                              | Lanaudière (14)                                    |                                                                                                                                                                                                                                                                            |                                                                                                                                                                                                                                                                                                                                                                                                                                                                                                                                                                                                                                                                                                                                                                                                                                                                                                                                 |   |                        |   |                              |   |                            |   |               |   |                |   |               |   |                |   |                            |   |                |   |                     |    |                                    |    |                           |    |            |    |                 |    |                  |    |                 |    |                       |
| 14                                                                                                                                              | Laurentides (15)                                   |                                                                                                                                                                                                                                                                            |                                                                                                                                                                                                                                                                                                                                                                                                                                                                                                                                                                                                                                                                                                                                                                                                                                                                                                                                 |   |                        |   |                              |   |                            |   |               |   |                |   |               |   |                |   |                            |   |                |   |                     |    |                                    |    |                           |    |            |    |                 |    |                  |    |                 |    |                       |
| 15                                                                                                                                              | Montérégie (16)                                    |                                                                                                                                                                                                                                                                            |                                                                                                                                                                                                                                                                                                                                                                                                                                                                                                                                                                                                                                                                                                                                                                                                                                                                                                                                 |   |                        |   |                              |   |                            |   |               |   |                |   |               |   |                |   |                            |   |                |   |                     |    |                                    |    |                           |    |            |    |                 |    |                  |    |                 |    |                       |
| 16                                                                                                                                              | Centre-du-Québec (17)                              |                                                                                                                                                                                                                                                                            |                                                                                                                                                                                                                                                                                                                                                                                                                                                                                                                                                                                                                                                                                                                                                                                                                                                                                                                                 |   |                        |   |                              |   |                            |   |               |   |                |   |               |   |                |   |                            |   |                |   |                     |    |                                    |    |                           |    |            |    |                 |    |                  |    |                 |    |                       |

|    |                                                                           |                                                             |                                                                                                                                                                                                                                                                                                                                                                                                                                                                                                                                                                                                                                                                                                                                                                                                                                                                                                     |   |                                        |   |                                                 |   |                                         |   |                                   |   |                             |   |                                                |   |                         |   |                                      |   |                         |    |            |    |              |    |               |    |                  |    |                               |    |         |    |       |
|----|---------------------------------------------------------------------------|-------------------------------------------------------------|-----------------------------------------------------------------------------------------------------------------------------------------------------------------------------------------------------------------------------------------------------------------------------------------------------------------------------------------------------------------------------------------------------------------------------------------------------------------------------------------------------------------------------------------------------------------------------------------------------------------------------------------------------------------------------------------------------------------------------------------------------------------------------------------------------------------------------------------------------------------------------------------------------|---|----------------------------------------|---|-------------------------------------------------|---|-----------------------------------------|---|-----------------------------------|---|-----------------------------|---|------------------------------------------------|---|-------------------------|---|--------------------------------------|---|-------------------------|----|------------|----|--------------|----|---------------|----|------------------|----|-------------------------------|----|---------|----|-------|
| 81 | recupro                                                                   | From which institution were you recruited for this project? | <p>radio</p> <table border="1"> <tr><td>1</td><td>At CHUM</td></tr> <tr><td>2</td><td>At CIUSSS de la Mauricie-et-du-Centre-du-Québec</td></tr> <tr><td>3</td><td>At CIUSSS de l'Est-de-l'Île-de-Montréal</td></tr> <tr><td>4</td><td>At CHU de Québec-Université Laval</td></tr> <tr><td>5</td><td>At CISSS de Laval</td></tr> <tr><td>6</td><td>At CIUSSS du Centre-Ouest-de-l'Île-de-Montréal</td></tr> <tr><td>7</td><td>At CISSS de la Gaspésie</td></tr> <tr><td>8</td><td>At CIUSSS du Saguenay-Lac-Saint-Jean</td></tr> <tr><td>9</td><td>At CUSM</td></tr> </table> <p>Alignement personnalisé : LV<br/>Annotation de champ: @p1000notes{"": "Établissement de recrutement"}</p>                                                                                                                                                                                                           | 1 | At CHUM                                | 2 | At CIUSSS de la Mauricie-et-du-Centre-du-Québec | 3 | At CIUSSS de l'Est-de-l'Île-de-Montréal | 4 | At CHU de Québec-Université Laval | 5 | At CISSS de Laval           | 6 | At CIUSSS du Centre-Ouest-de-l'Île-de-Montréal | 7 | At CISSS de la Gaspésie | 8 | At CIUSSS du Saguenay-Lac-Saint-Jean | 9 | At CUSM                 |    |            |    |              |    |               |    |                  |    |                               |    |         |    |       |
| 1  | At CHUM                                                                   |                                                             |                                                                                                                                                                                                                                                                                                                                                                                                                                                                                                                                                                                                                                                                                                                                                                                                                                                                                                     |   |                                        |   |                                                 |   |                                         |   |                                   |   |                             |   |                                                |   |                         |   |                                      |   |                         |    |            |    |              |    |               |    |                  |    |                               |    |         |    |       |
| 2  | At CIUSSS de la Mauricie-et-du-Centre-du-Québec                           |                                                             |                                                                                                                                                                                                                                                                                                                                                                                                                                                                                                                                                                                                                                                                                                                                                                                                                                                                                                     |   |                                        |   |                                                 |   |                                         |   |                                   |   |                             |   |                                                |   |                         |   |                                      |   |                         |    |            |    |              |    |               |    |                  |    |                               |    |         |    |       |
| 3  | At CIUSSS de l'Est-de-l'Île-de-Montréal                                   |                                                             |                                                                                                                                                                                                                                                                                                                                                                                                                                                                                                                                                                                                                                                                                                                                                                                                                                                                                                     |   |                                        |   |                                                 |   |                                         |   |                                   |   |                             |   |                                                |   |                         |   |                                      |   |                         |    |            |    |              |    |               |    |                  |    |                               |    |         |    |       |
| 4  | At CHU de Québec-Université Laval                                         |                                                             |                                                                                                                                                                                                                                                                                                                                                                                                                                                                                                                                                                                                                                                                                                                                                                                                                                                                                                     |   |                                        |   |                                                 |   |                                         |   |                                   |   |                             |   |                                                |   |                         |   |                                      |   |                         |    |            |    |              |    |               |    |                  |    |                               |    |         |    |       |
| 5  | At CISSS de Laval                                                         |                                                             |                                                                                                                                                                                                                                                                                                                                                                                                                                                                                                                                                                                                                                                                                                                                                                                                                                                                                                     |   |                                        |   |                                                 |   |                                         |   |                                   |   |                             |   |                                                |   |                         |   |                                      |   |                         |    |            |    |              |    |               |    |                  |    |                               |    |         |    |       |
| 6  | At CIUSSS du Centre-Ouest-de-l'Île-de-Montréal                            |                                                             |                                                                                                                                                                                                                                                                                                                                                                                                                                                                                                                                                                                                                                                                                                                                                                                                                                                                                                     |   |                                        |   |                                                 |   |                                         |   |                                   |   |                             |   |                                                |   |                         |   |                                      |   |                         |    |            |    |              |    |               |    |                  |    |                               |    |         |    |       |
| 7  | At CISSS de la Gaspésie                                                   |                                                             |                                                                                                                                                                                                                                                                                                                                                                                                                                                                                                                                                                                                                                                                                                                                                                                                                                                                                                     |   |                                        |   |                                                 |   |                                         |   |                                   |   |                             |   |                                                |   |                         |   |                                      |   |                         |    |            |    |              |    |               |    |                  |    |                               |    |         |    |       |
| 8  | At CIUSSS du Saguenay-Lac-Saint-Jean                                      |                                                             |                                                                                                                                                                                                                                                                                                                                                                                                                                                                                                                                                                                                                                                                                                                                                                                                                                                                                                     |   |                                        |   |                                                 |   |                                         |   |                                   |   |                             |   |                                                |   |                         |   |                                      |   |                         |    |            |    |              |    |               |    |                  |    |                               |    |         |    |       |
| 9  | At CUSM                                                                   |                                                             |                                                                                                                                                                                                                                                                                                                                                                                                                                                                                                                                                                                                                                                                                                                                                                                                                                                                                                     |   |                                        |   |                                                 |   |                                         |   |                                   |   |                             |   |                                                |   |                         |   |                                      |   |                         |    |            |    |              |    |               |    |                  |    |                               |    |         |    |       |
| 82 | pro_occup                                                                 | What is your profession?                                    | <p>radio</p> <table border="1"> <tr><td>0</td><td>Family physician, general practitioner</td></tr> <tr><td>1</td><td>Hemato-oncologist</td></tr> <tr><td>3</td><td>Radio-oncologist</td></tr> <tr><td>4</td><td>Medical oncologist</td></tr> <tr><td>5</td><td>General oncological surgeon</td></tr> <tr><td>6</td><td>Nurse</td></tr> <tr><td>7</td><td>Auxiliary nurse</td></tr> <tr><td>8</td><td>Clinical Nurse</td></tr> <tr><td>9</td><td>Pivot nurse in oncology</td></tr> <tr><td>11</td><td>Pharmacist</td></tr> <tr><td>12</td><td>Psychologist</td></tr> <tr><td>13</td><td>Social worker</td></tr> <tr><td>14</td><td>Community worker</td></tr> <tr><td>15</td><td>Technologist (radio-oncology)</td></tr> <tr><td>16</td><td>Manager</td></tr> <tr><td>17</td><td>Other</td></tr> </table> <p>Alignement personnalisé : LV<br/>Annotation de champ: @p1000notes{"": "Occupation"}</p> | 0 | Family physician, general practitioner | 1 | Hemato-oncologist                               | 3 | Radio-oncologist                        | 4 | Medical oncologist                | 5 | General oncological surgeon | 6 | Nurse                                          | 7 | Auxiliary nurse         | 8 | Clinical Nurse                       | 9 | Pivot nurse in oncology | 11 | Pharmacist | 12 | Psychologist | 13 | Social worker | 14 | Community worker | 15 | Technologist (radio-oncology) | 16 | Manager | 17 | Other |
| 0  | Family physician, general practitioner                                    |                                                             |                                                                                                                                                                                                                                                                                                                                                                                                                                                                                                                                                                                                                                                                                                                                                                                                                                                                                                     |   |                                        |   |                                                 |   |                                         |   |                                   |   |                             |   |                                                |   |                         |   |                                      |   |                         |    |            |    |              |    |               |    |                  |    |                               |    |         |    |       |
| 1  | Hemato-oncologist                                                         |                                                             |                                                                                                                                                                                                                                                                                                                                                                                                                                                                                                                                                                                                                                                                                                                                                                                                                                                                                                     |   |                                        |   |                                                 |   |                                         |   |                                   |   |                             |   |                                                |   |                         |   |                                      |   |                         |    |            |    |              |    |               |    |                  |    |                               |    |         |    |       |
| 3  | Radio-oncologist                                                          |                                                             |                                                                                                                                                                                                                                                                                                                                                                                                                                                                                                                                                                                                                                                                                                                                                                                                                                                                                                     |   |                                        |   |                                                 |   |                                         |   |                                   |   |                             |   |                                                |   |                         |   |                                      |   |                         |    |            |    |              |    |               |    |                  |    |                               |    |         |    |       |
| 4  | Medical oncologist                                                        |                                                             |                                                                                                                                                                                                                                                                                                                                                                                                                                                                                                                                                                                                                                                                                                                                                                                                                                                                                                     |   |                                        |   |                                                 |   |                                         |   |                                   |   |                             |   |                                                |   |                         |   |                                      |   |                         |    |            |    |              |    |               |    |                  |    |                               |    |         |    |       |
| 5  | General oncological surgeon                                               |                                                             |                                                                                                                                                                                                                                                                                                                                                                                                                                                                                                                                                                                                                                                                                                                                                                                                                                                                                                     |   |                                        |   |                                                 |   |                                         |   |                                   |   |                             |   |                                                |   |                         |   |                                      |   |                         |    |            |    |              |    |               |    |                  |    |                               |    |         |    |       |
| 6  | Nurse                                                                     |                                                             |                                                                                                                                                                                                                                                                                                                                                                                                                                                                                                                                                                                                                                                                                                                                                                                                                                                                                                     |   |                                        |   |                                                 |   |                                         |   |                                   |   |                             |   |                                                |   |                         |   |                                      |   |                         |    |            |    |              |    |               |    |                  |    |                               |    |         |    |       |
| 7  | Auxiliary nurse                                                           |                                                             |                                                                                                                                                                                                                                                                                                                                                                                                                                                                                                                                                                                                                                                                                                                                                                                                                                                                                                     |   |                                        |   |                                                 |   |                                         |   |                                   |   |                             |   |                                                |   |                         |   |                                      |   |                         |    |            |    |              |    |               |    |                  |    |                               |    |         |    |       |
| 8  | Clinical Nurse                                                            |                                                             |                                                                                                                                                                                                                                                                                                                                                                                                                                                                                                                                                                                                                                                                                                                                                                                                                                                                                                     |   |                                        |   |                                                 |   |                                         |   |                                   |   |                             |   |                                                |   |                         |   |                                      |   |                         |    |            |    |              |    |               |    |                  |    |                               |    |         |    |       |
| 9  | Pivot nurse in oncology                                                   |                                                             |                                                                                                                                                                                                                                                                                                                                                                                                                                                                                                                                                                                                                                                                                                                                                                                                                                                                                                     |   |                                        |   |                                                 |   |                                         |   |                                   |   |                             |   |                                                |   |                         |   |                                      |   |                         |    |            |    |              |    |               |    |                  |    |                               |    |         |    |       |
| 11 | Pharmacist                                                                |                                                             |                                                                                                                                                                                                                                                                                                                                                                                                                                                                                                                                                                                                                                                                                                                                                                                                                                                                                                     |   |                                        |   |                                                 |   |                                         |   |                                   |   |                             |   |                                                |   |                         |   |                                      |   |                         |    |            |    |              |    |               |    |                  |    |                               |    |         |    |       |
| 12 | Psychologist                                                              |                                                             |                                                                                                                                                                                                                                                                                                                                                                                                                                                                                                                                                                                                                                                                                                                                                                                                                                                                                                     |   |                                        |   |                                                 |   |                                         |   |                                   |   |                             |   |                                                |   |                         |   |                                      |   |                         |    |            |    |              |    |               |    |                  |    |                               |    |         |    |       |
| 13 | Social worker                                                             |                                                             |                                                                                                                                                                                                                                                                                                                                                                                                                                                                                                                                                                                                                                                                                                                                                                                                                                                                                                     |   |                                        |   |                                                 |   |                                         |   |                                   |   |                             |   |                                                |   |                         |   |                                      |   |                         |    |            |    |              |    |               |    |                  |    |                               |    |         |    |       |
| 14 | Community worker                                                          |                                                             |                                                                                                                                                                                                                                                                                                                                                                                                                                                                                                                                                                                                                                                                                                                                                                                                                                                                                                     |   |                                        |   |                                                 |   |                                         |   |                                   |   |                             |   |                                                |   |                         |   |                                      |   |                         |    |            |    |              |    |               |    |                  |    |                               |    |         |    |       |
| 15 | Technologist (radio-oncology)                                             |                                                             |                                                                                                                                                                                                                                                                                                                                                                                                                                                                                                                                                                                                                                                                                                                                                                                                                                                                                                     |   |                                        |   |                                                 |   |                                         |   |                                   |   |                             |   |                                                |   |                         |   |                                      |   |                         |    |            |    |              |    |               |    |                  |    |                               |    |         |    |       |
| 16 | Manager                                                                   |                                                             |                                                                                                                                                                                                                                                                                                                                                                                                                                                                                                                                                                                                                                                                                                                                                                                                                                                                                                     |   |                                        |   |                                                 |   |                                         |   |                                   |   |                             |   |                                                |   |                         |   |                                      |   |                         |    |            |    |              |    |               |    |                  |    |                               |    |         |    |       |
| 17 | Other                                                                     |                                                             |                                                                                                                                                                                                                                                                                                                                                                                                                                                                                                                                                                                                                                                                                                                                                                                                                                                                                                     |   |                                        |   |                                                 |   |                                         |   |                                   |   |                             |   |                                                |   |                         |   |                                      |   |                         |    |            |    |              |    |               |    |                  |    |                               |    |         |    |       |
| 83 | pro_occupautre<br>Afficher le champ UNIQUEMENT si :<br>[pro_occup] = '17' | If Other, specify :                                         | <p>text</p> <p>Annotation de champ: @p1000notes{"": "Autre occupation"}</p>                                                                                                                                                                                                                                                                                                                                                                                                                                                                                                                                                                                                                                                                                                                                                                                                                         |   |                                        |   |                                                 |   |                                         |   |                                   |   |                             |   |                                                |   |                         |   |                                      |   |                         |    |            |    |              |    |               |    |                  |    |                               |    |         |    |       |
| 84 | pro_sexe                                                                  | What is your gender?                                        | <p>radio</p> <table border="1"> <tr><td>0</td><td>Male</td></tr> <tr><td>1</td><td>Female</td></tr> </table> <p>Alignement personnalisé : LV<br/>Annotation de champ: @p1000notes{"": "Sexe"}</p>                                                                                                                                                                                                                                                                                                                                                                                                                                                                                                                                                                                                                                                                                                   | 0 | Male                                   | 1 | Female                                          |   |                                         |   |                                   |   |                             |   |                                                |   |                         |   |                                      |   |                         |    |            |    |              |    |               |    |                  |    |                               |    |         |    |       |
| 0  | Male                                                                      |                                                             |                                                                                                                                                                                                                                                                                                                                                                                                                                                                                                                                                                                                                                                                                                                                                                                                                                                                                                     |   |                                        |   |                                                 |   |                                         |   |                                   |   |                             |   |                                                |   |                         |   |                                      |   |                         |    |            |    |              |    |               |    |                  |    |                               |    |         |    |       |
| 1  | Female                                                                    |                                                             |                                                                                                                                                                                                                                                                                                                                                                                                                                                                                                                                                                                                                                                                                                                                                                                                                                                                                                     |   |                                        |   |                                                 |   |                                         |   |                                   |   |                             |   |                                                |   |                         |   |                                      |   |                         |    |            |    |              |    |               |    |                  |    |                               |    |         |    |       |
| 85 | pro_age                                                                   | What is your age group?                                     | <p>radio</p> <table border="1"> <tr><td>0</td><td>24 years old and under</td></tr> <tr><td>1</td><td>25 - 34 years old</td></tr> <tr><td>2</td><td>35 - 44 years old</td></tr> <tr><td>3</td><td>45 - 54 years old</td></tr> <tr><td>4</td><td>55 - 64 years old</td></tr> <tr><td>5</td><td>65 - 74 years old</td></tr> <tr><td>6</td><td>75 years old and over</td></tr> </table> <p>Alignement personnalisé : LV</p>                                                                                                                                                                                                                                                                                                                                                                                                                                                                             | 0 | 24 years old and under                 | 1 | 25 - 34 years old                               | 2 | 35 - 44 years old                       | 3 | 45 - 54 years old                 | 4 | 55 - 64 years old           | 5 | 65 - 74 years old                              | 6 | 75 years old and over   |   |                                      |   |                         |    |            |    |              |    |               |    |                  |    |                               |    |         |    |       |
| 0  | 24 years old and under                                                    |                                                             |                                                                                                                                                                                                                                                                                                                                                                                                                                                                                                                                                                                                                                                                                                                                                                                                                                                                                                     |   |                                        |   |                                                 |   |                                         |   |                                   |   |                             |   |                                                |   |                         |   |                                      |   |                         |    |            |    |              |    |               |    |                  |    |                               |    |         |    |       |
| 1  | 25 - 34 years old                                                         |                                                             |                                                                                                                                                                                                                                                                                                                                                                                                                                                                                                                                                                                                                                                                                                                                                                                                                                                                                                     |   |                                        |   |                                                 |   |                                         |   |                                   |   |                             |   |                                                |   |                         |   |                                      |   |                         |    |            |    |              |    |               |    |                  |    |                               |    |         |    |       |
| 2  | 35 - 44 years old                                                         |                                                             |                                                                                                                                                                                                                                                                                                                                                                                                                                                                                                                                                                                                                                                                                                                                                                                                                                                                                                     |   |                                        |   |                                                 |   |                                         |   |                                   |   |                             |   |                                                |   |                         |   |                                      |   |                         |    |            |    |              |    |               |    |                  |    |                               |    |         |    |       |
| 3  | 45 - 54 years old                                                         |                                                             |                                                                                                                                                                                                                                                                                                                                                                                                                                                                                                                                                                                                                                                                                                                                                                                                                                                                                                     |   |                                        |   |                                                 |   |                                         |   |                                   |   |                             |   |                                                |   |                         |   |                                      |   |                         |    |            |    |              |    |               |    |                  |    |                               |    |         |    |       |
| 4  | 55 - 64 years old                                                         |                                                             |                                                                                                                                                                                                                                                                                                                                                                                                                                                                                                                                                                                                                                                                                                                                                                                                                                                                                                     |   |                                        |   |                                                 |   |                                         |   |                                   |   |                             |   |                                                |   |                         |   |                                      |   |                         |    |            |    |              |    |               |    |                  |    |                               |    |         |    |       |
| 5  | 65 - 74 years old                                                         |                                                             |                                                                                                                                                                                                                                                                                                                                                                                                                                                                                                                                                                                                                                                                                                                                                                                                                                                                                                     |   |                                        |   |                                                 |   |                                         |   |                                   |   |                             |   |                                                |   |                         |   |                                      |   |                         |    |            |    |              |    |               |    |                  |    |                               |    |         |    |       |
| 6  | 75 years old and over                                                     |                                                             |                                                                                                                                                                                                                                                                                                                                                                                                                                                                                                                                                                                                                                                                                                                                                                                                                                                                                                     |   |                                        |   |                                                 |   |                                         |   |                                   |   |                             |   |                                                |   |                         |   |                                      |   |                         |    |            |    |              |    |               |    |                  |    |                               |    |         |    |       |

|    |                                                                                    |                                                                                                                                                                                                                                        |                                                                                                                                                                                                                                                                                                                                                                                                          |   |                                     |                             |                                          |                  |                                          |   |                                      |                                                      |                   |               |                |   |               |       |
|----|------------------------------------------------------------------------------------|----------------------------------------------------------------------------------------------------------------------------------------------------------------------------------------------------------------------------------------|----------------------------------------------------------------------------------------------------------------------------------------------------------------------------------------------------------------------------------------------------------------------------------------------------------------------------------------------------------------------------------------------------------|---|-------------------------------------|-----------------------------|------------------------------------------|------------------|------------------------------------------|---|--------------------------------------|------------------------------------------------------|-------------------|---------------|----------------|---|---------------|-------|
| 86 | pro_scol                                                                           | What is the highest level of education you have completed?                                                                                                                                                                             | <table border="1"> <tr><td>0</td><td>Secondary or professional (DES/DEP)</td></tr> <tr><td>1</td><td>College (Non-University Certificate/DEC)</td></tr> <tr><td>2</td><td>University</td></tr> <tr><td>3</td><td>Other</td></tr> </table> <p>Alignement personnalisé : LV</p>                                                                                                                            | 0 | Secondary or professional (DES/DEP) | 1                           | College (Non-University Certificate/DEC) | 2                | University                               | 3 | Other                                |                                                      |                   |               |                |   |               |       |
| 0  | Secondary or professional (DES/DEP)                                                |                                                                                                                                                                                                                                        |                                                                                                                                                                                                                                                                                                                                                                                                          |   |                                     |                             |                                          |                  |                                          |   |                                      |                                                      |                   |               |                |   |               |       |
| 1  | College (Non-University Certificate/DEC)                                           |                                                                                                                                                                                                                                        |                                                                                                                                                                                                                                                                                                                                                                                                          |   |                                     |                             |                                          |                  |                                          |   |                                      |                                                      |                   |               |                |   |               |       |
| 2  | University                                                                         |                                                                                                                                                                                                                                        |                                                                                                                                                                                                                                                                                                                                                                                                          |   |                                     |                             |                                          |                  |                                          |   |                                      |                                                      |                   |               |                |   |               |       |
| 3  | Other                                                                              |                                                                                                                                                                                                                                        |                                                                                                                                                                                                                                                                                                                                                                                                          |   |                                     |                             |                                          |                  |                                          |   |                                      |                                                      |                   |               |                |   |               |       |
| 87 | pro_scolautre<br>Afficher le champ UNIQUEM<br>ENT si :<br>[pro_scol] = '3'         | If other, please specify:                                                                                                                                                                                                              | text<br>Alignement personnalisé : LV                                                                                                                                                                                                                                                                                                                                                                     |   |                                     |                             |                                          |                  |                                          |   |                                      |                                                      |                   |               |                |   |               |       |
| 88 | pro_postean                                                                        | How long have you been in this position?                                                                                                                                                                                               | <table border="1"> <tr><td>0</td><td>Less than 1 year</td></tr> <tr><td>1</td><td>Between 1 and less than 3 years old</td></tr> <tr><td>2</td><td>Between 3 and less than 5 years old</td></tr> <tr><td>3</td><td>Between 5 and less than 10 years old</td></tr> <tr><td>4</td><td>10 years and over</td></tr> </table> <p>Alignement personnalisé : LV</p>                                              | 0 | Less than 1 year                    | 1                           | Between 1 and less than 3 years old      | 2                | Between 3 and less than 5 years old      | 3 | Between 5 and less than 10 years old | 4                                                    | 10 years and over |               |                |   |               |       |
| 0  | Less than 1 year                                                                   |                                                                                                                                                                                                                                        |                                                                                                                                                                                                                                                                                                                                                                                                          |   |                                     |                             |                                          |                  |                                          |   |                                      |                                                      |                   |               |                |   |               |       |
| 1  | Between 1 and less than 3 years old                                                |                                                                                                                                                                                                                                        |                                                                                                                                                                                                                                                                                                                                                                                                          |   |                                     |                             |                                          |                  |                                          |   |                                      |                                                      |                   |               |                |   |               |       |
| 2  | Between 3 and less than 5 years old                                                |                                                                                                                                                                                                                                        |                                                                                                                                                                                                                                                                                                                                                                                                          |   |                                     |                             |                                          |                  |                                          |   |                                      |                                                      |                   |               |                |   |               |       |
| 3  | Between 5 and less than 10 years old                                               |                                                                                                                                                                                                                                        |                                                                                                                                                                                                                                                                                                                                                                                                          |   |                                     |                             |                                          |                  |                                          |   |                                      |                                                      |                   |               |                |   |               |       |
| 4  | 10 years and over                                                                  |                                                                                                                                                                                                                                        |                                                                                                                                                                                                                                                                                                                                                                                                          |   |                                     |                             |                                          |                  |                                          |   |                                      |                                                      |                   |               |                |   |               |       |
| 89 | pro_posteanprecise<br>Afficher le champ UNIQUEM<br>ENT si :<br>[pro_postean] = '4' | If 10 years and over, please specify :<br><i>X years</i>                                                                                                                                                                               | text (number)<br>Alignement personnalisé : LV                                                                                                                                                                                                                                                                                                                                                            |   |                                     |                             |                                          |                  |                                          |   |                                      |                                                      |                   |               |                |   |               |       |
| 90 | pro_milieu                                                                         | In which environment(s) do you work?                                                                                                                                                                                                   | <table border="1"> <tr><td>0</td><td>pro_milieu__0</td><td>Family Medicine Group (FMG)</td></tr> <tr><td>1</td><td>pro_milieu__1</td><td>Outpatient Cancer Clinic</td></tr> <tr><td>2</td><td>pro_milieu__2</td><td>CLSC</td></tr> <tr><td>3</td><td>pro_milieu__3</td><td>Inpatient Unit</td></tr> <tr><td>4</td><td>pro_milieu__4</td><td>Other</td></tr> </table> <p>Alignement personnalisé : LV</p> | 0 | pro_milieu__0                       | Family Medicine Group (FMG) | 1                                        | pro_milieu__1    | Outpatient Cancer Clinic                 | 2 | pro_milieu__2                        | CLSC                                                 | 3                 | pro_milieu__3 | Inpatient Unit | 4 | pro_milieu__4 | Other |
| 0  | pro_milieu__0                                                                      | Family Medicine Group (FMG)                                                                                                                                                                                                            |                                                                                                                                                                                                                                                                                                                                                                                                          |   |                                     |                             |                                          |                  |                                          |   |                                      |                                                      |                   |               |                |   |               |       |
| 1  | pro_milieu__1                                                                      | Outpatient Cancer Clinic                                                                                                                                                                                                               |                                                                                                                                                                                                                                                                                                                                                                                                          |   |                                     |                             |                                          |                  |                                          |   |                                      |                                                      |                   |               |                |   |               |       |
| 2  | pro_milieu__2                                                                      | CLSC                                                                                                                                                                                                                                   |                                                                                                                                                                                                                                                                                                                                                                                                          |   |                                     |                             |                                          |                  |                                          |   |                                      |                                                      |                   |               |                |   |               |       |
| 3  | pro_milieu__3                                                                      | Inpatient Unit                                                                                                                                                                                                                         |                                                                                                                                                                                                                                                                                                                                                                                                          |   |                                     |                             |                                          |                  |                                          |   |                                      |                                                      |                   |               |                |   |               |       |
| 4  | pro_milieu__4                                                                      | Other                                                                                                                                                                                                                                  |                                                                                                                                                                                                                                                                                                                                                                                                          |   |                                     |                             |                                          |                  |                                          |   |                                      |                                                      |                   |               |                |   |               |       |
| 91 | pro_milieuautre<br>Afficher le champ UNIQUEM<br>ENT si :<br>[pro_milieu(4)] = '1'  | If other, please specify :                                                                                                                                                                                                             | text<br>Alignement personnalisé : LV                                                                                                                                                                                                                                                                                                                                                                     |   |                                     |                             |                                          |                  |                                          |   |                                      |                                                      |                   |               |                |   |               |       |
| 92 | pro_milieumed<br>Afficher le champ UNIQUEM<br>ENT si :<br>[pro_milieu(0)] = '1'    | If you work in a FMG, please specify :                                                                                                                                                                                                 | <table border="1"> <tr><td>0</td><td>pro_milieumed__0</td><td>Family Medicine Group (FMG)</td></tr> <tr><td>1</td><td>pro_milieumed__1</td><td>University Family Medicine Group (FMG-U)</td></tr> <tr><td>2</td><td>pro_milieumed__2</td><td>Family Medicine Network Group (FMG-R or Superclinic)</td></tr> </table> <p>Alignement personnalisé : LV</p>                                                 | 0 | pro_milieumed__0                    | Family Medicine Group (FMG) | 1                                        | pro_milieumed__1 | University Family Medicine Group (FMG-U) | 2 | pro_milieumed__2                     | Family Medicine Network Group (FMG-R or Superclinic) |                   |               |                |   |               |       |
| 0  | pro_milieumed__0                                                                   | Family Medicine Group (FMG)                                                                                                                                                                                                            |                                                                                                                                                                                                                                                                                                                                                                                                          |   |                                     |                             |                                          |                  |                                          |   |                                      |                                                      |                   |               |                |   |               |       |
| 1  | pro_milieumed__1                                                                   | University Family Medicine Group (FMG-U)                                                                                                                                                                                               |                                                                                                                                                                                                                                                                                                                                                                                                          |   |                                     |                             |                                          |                  |                                          |   |                                      |                                                      |                   |               |                |   |               |       |
| 2  | pro_milieumed__2                                                                   | Family Medicine Network Group (FMG-R or Superclinic)                                                                                                                                                                                   |                                                                                                                                                                                                                                                                                                                                                                                                          |   |                                     |                             |                                          |                  |                                          |   |                                      |                                                      |                   |               |                |   |               |       |
| 93 | pro_bidon9                                                                         | Answer the following questions based on an average that you feel is representative.<br><i>X heure(s)</i>                                                                                                                               | descriptive                                                                                                                                                                                                                                                                                                                                                                                              |   |                                     |                             |                                          |                  |                                          |   |                                      |                                                      |                   |               |                |   |               |       |
| 94 | pro_heuresem_qso                                                                   | How many hours do you work per week?<br><i>X hours</i>                                                                                                                                                                                 | text (number)<br>Alignement personnalisé : LV                                                                                                                                                                                                                                                                                                                                                            |   |                                     |                             |                                          |                  |                                          |   |                                      |                                                      |                   |               |                |   |               |       |
| 95 | pro_heureonco_qso                                                                  | How many hours per week do you work more specifically for oncology or oncogenetics patients?<br>(If the question does not apply, please indicate 0)<br><i>X hour(s) (including clinical and management activities, projects, etc.)</i> | text (number)<br>Alignement personnalisé : LV                                                                                                                                                                                                                                                                                                                                                            |   |                                     |                             |                                          |                  |                                          |   |                                      |                                                      |                   |               |                |   |               |       |
| 96 | pro_perjour_qso                                                                    | How many patients do you see per week, regardless of the type of patient?<br>(If the question does not apply, please indicate 0)<br><i>X patient(s)</i>                                                                                | text (number)<br>Alignement personnalisé : LV                                                                                                                                                                                                                                                                                                                                                            |   |                                     |                             |                                          |                  |                                          |   |                                      |                                                      |                   |               |                |   |               |       |
| 97 | pro_personco_qso                                                                   | How many patients do you see in a week in an oncology or oncogenetic clinic?<br>(If the question does not apply, please indicate 0)<br><i>X patient(s)</i>                                                                             | text<br>Alignement personnalisé : LV                                                                                                                                                                                                                                                                                                                                                                     |   |                                     |                             |                                          |                  |                                          |   |                                      |                                                      |                   |               |                |   |               |       |
| 98 | pro_depotqsocio                                                                    | For administration: submission of the paper questionnaire.                                                                                                                                                                             | file<br>Alignement personnalisé : LV                                                                                                                                                                                                                                                                                                                                                                     |   |                                     |                             |                                          |                  |                                          |   |                                      |                                                      |                   |               |                |   |               |       |

|                                                                                                              |                                                    |                                                      |                                                                                                                                                                                       |          |  |   |            |   |            |   |          |
|--------------------------------------------------------------------------------------------------------------|----------------------------------------------------|------------------------------------------------------|---------------------------------------------------------------------------------------------------------------------------------------------------------------------------------------|----------|--|---|------------|---|------------|---|----------|
| 99                                                                                                           | paroleonco_sociodemographic_questionnaire_complete | En-tête de section : <i>Form Status</i><br>Complete? | <table border="1"> <tr><td colspan="2">dropdown</td></tr> <tr><td>0</td><td>Incomplete</td></tr> <tr><td>1</td><td>Unverified</td></tr> <tr><td>2</td><td>Complete</td></tr> </table> | dropdown |  | 0 | Incomplete | 1 | Unverified | 2 | Complete |
| dropdown                                                                                                     |                                                    |                                                      |                                                                                                                                                                                       |          |  |   |            |   |            |   |          |
| 0                                                                                                            | Incomplete                                         |                                                      |                                                                                                                                                                                       |          |  |   |            |   |            |   |          |
| 1                                                                                                            | Unverified                                         |                                                      |                                                                                                                                                                                       |          |  |   |            |   |            |   |          |
| 2                                                                                                            | Complete                                           |                                                      |                                                                                                                                                                                       |          |  |   |            |   |            |   |          |
| Formulaire : <b>PAROLE-Onco- Questionnaire T2- Clinical Team</b> (paroleonco_questionnaire_t2_clinical_team) |                                                    |                                                      | <a href="#">Expand</a>                                                                                                                                                                |          |  |   |            |   |            |   |          |
| Formulaire : <b>Focus group</b> (focus_group)                                                                |                                                    |                                                      | <a href="#">Expand</a>                                                                                                                                                                |          |  |   |            |   |            |   |          |
| Formulaire : <b>Interview</b> (interview)                                                                    |                                                    |                                                      | <a href="#">Expand</a>                                                                                                                                                                |          |  |   |            |   |            |   |          |
| Formulaire : <b>Pilot interview</b> (pilot_interview)                                                        |                                                    |                                                      | <a href="#">Expand</a>                                                                                                                                                                |          |  |   |            |   |            |   |          |
| Formulaire : <b>Focus group general form</b> (focus_group_general_form)                                      |                                                    |                                                      | <a href="#">Expand</a>                                                                                                                                                                |          |  |   |            |   |            |   |          |
| Formulaire : <b>Status - End of study</b> (status_end_of_study)                                              |                                                    |                                                      | <a href="#">Expand</a>                                                                                                                                                                |          |  |   |            |   |            |   |          |
